# Supplementary material for: 1,5-Hydrogen atom transfer of α-iminyl radical cations: a new platform for relay annulation for pyridine derivatives and axially chiral heterobiaryls
Source: Royal Society of Chemistry journal article supplement (doi:10.1039/d4sc01858c), 2024-01-01

## Supporting Information

### 1,5-Hydrogen Atom Transfer of $\alpha$ -Iminyl Radical Cations: A New Platform for Relay Annulation towards Pyridine Derivatives and Axially Chiral Heterobiaryls

Yu-Qiang Zhou, Kui-Cheng He, Wei-Hao Zheng, Jing-Fang Lv, Shi-Mei He, Ning Yu, Yun-Bo Yang, Lv-Yan Liu, Kun Jiang,\* and Ye Wei\*

Key Laboratory of Applied Chemistry of Chongqing Municipality, School of Chemistry and Chemical Engineering, Southwest University, Chongqing, 400715, China

### Table of Contents

|                                                                                                      |     |
|------------------------------------------------------------------------------------------------------|-----|
| General Information.....                                                                             | S2  |
| Preparation of Starting Materials .....                                                              | S3  |
| General Procedures for the Synthesis of Oxime Esters.....                                            | S3  |
| The Characterization Data for Oxime Esters .....                                                     | S8  |
| General Procedures for the Synthesis of Enals .....                                                  | S12 |
| The Characterization Data for Enals .....                                                            | S15 |
| Optimization of the Reaction Conditions.....                                                         | S22 |
| Construction of Fused Pyridines and Axially Chiral Heterobiaryls .....                               | S26 |
| General Procedures Toward Fused Pyridines.....                                                       | S26 |
| General Procedures Toward Axially Chiral Heterobiaryls .....                                         | S26 |
| Characterization Data for Products .....                                                             | S27 |
| Synthetic Transformations .....                                                                      | S70 |
| Scale-up Reaction .....                                                                              | S70 |
| Synthetic Transformations of pyridines .....                                                         | S71 |
| Synthetic Transformations of Axially Chiral Heterobiaryls.....                                       | S76 |
| Mechanistic Studies .....                                                                            | S81 |
| (a) Role of the Secondary Amine .....                                                                | S81 |
| (b) Experimental Evidence for the $\alpha$ -Carbon Radical.....                                      | S81 |
| (c) Experimental Evidence for the $\alpha$ -Iminyl Radical Cation.....                               | S82 |
| (d) Experimental Evidence for the $\alpha$ -Iminyl Radical Cation-Triggered 1,5-HAT .....            | S83 |
| (e) Exclusion of A Route to the Pyridine via A Condensation of A Ketone, An Enal and An Ammonia..... | S85 |
| Proposed Mechanism for the Formation of 3' .....                                                     | S86 |
| Proposed Model for the Central-to-Axial Chirality Conversion .....                                   | S87 |
| References.....                                                                                      | S88 |
| NMR Spectra of the New Compounds.....                                                                | S91 |

## General Information

**Methods.** All reactions dealing with air- and moisture-sensitive compounds were carried out in dry reaction vessels under a nitrogen atmosphere. Flash column chromatography was performed using 200-300 mesh silica gels. Thin layer chromatography was used for product detection using silica gel-coated plates, with visualization effected via exposure to UV Light at 254 nm or staining and heating with 2,4-Dinitrophenylhydrazine (DNP) or 1,2,3-Indantrione Monohydrate.

**Instrumentation.**  $^1\text{H}$  NMR,  $^{13}\text{C}$  NMR and  $^{19}\text{F}$  NMR spectra were obtained on a Bruker Ascend 400 at 400 MHz ( $^1\text{H}$  NMR at 400 MHz,  $^{13}\text{C}$  NMR at 101 MHz,  $^{19}\text{F}$  NMR at 376 MHz) and Bruker Ascend 600 at 600 MHz ( $^1\text{H}$  NMR at 600 MHz,  $^{13}\text{C}$  NMR at 151 MHz,  $^{19}\text{F}$  NMR at 565 MHz) at ambient temperature with chloroform- $d$  as the deuterated solvent unless stated otherwise. All chemical shifts  $\delta$  are reported in parts per million (ppm), and the residual solvent peak was used as an internal reference: proton (chloroform  $\delta$  7.26), carbon (chloroform  $\delta$  77.0), or tetramethylsilane (TMS  $\delta$  0.00) was used as a reference. Coupling constants (J) were reported in Hertz (Hz) and referred to apparent peak multiplications. Data for  $^1\text{H}$  NMR spectra were reported as follows: chemical shift (ppm), multiplicity (given as s(singlet), d (doublet), t (triplet), q (quartet), m (multiplet), br (broad) or a combination of them), coupling constants (Hz) and integration.  $^{13}\text{C}$  NMR was only reported as chemical shifts. High-resolution mass spectra (HRMS) were recorded on a Bruker Impact II Q-TOF mass spectrometer (ESI). The enantiomeric ratios of products were determined by chiral phase HPLC analysis (Chiralpak AD-H, IE, ID columns were purchased from Daicel Chemical Industries, LTD). Optical rotations were determined at  $\lambda = 589$  nm (sodium D line) at 25 °C by using a Rudolph-API automatic polarimeter. Gas chromatography (GC) analysis was performed on Shimadzu GC-2014. Single crystal X-ray data were recorded in a diffractometer with Mo  $K\alpha$  radiation. Melting points were determined using a capillary melting point apparatus and were uncorrected.

**Materials.** Unless stated otherwise, materials were purchased from commercial suppliers and used without additional purification. Anhydrous 1,4-dioxane, toluene, and other solvents were dried and degassed by standard methods and stored under  $\text{N}_2$  atmosphere. Ammonium and iminium salts were prepared according to the literature procedure.<sup>1</sup>

## Preparation of Starting Materials

### General Procedures for the Synthesis of Oxime Esters

All oximes were synthesized according to general procedures (Methods A, B, C, D, and A') reported in the literature.<sup>2-10</sup> The characterization data of newly synthesized substrates were summarized below. <sup>1</sup>H, <sup>13</sup>C NMR and <sup>19</sup>F NMR spectra data for the rest of known ones were in agreement with the literature data.

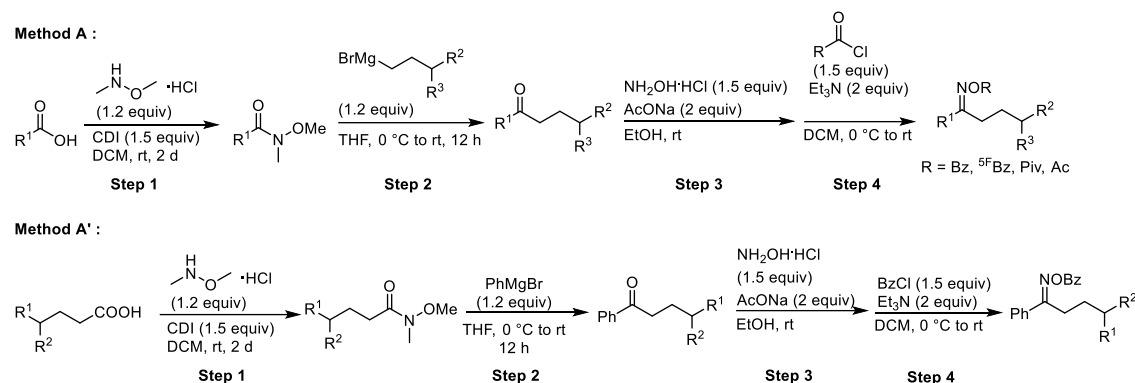

### Method A and Method A'

#### Step 1

A 100 mL flask was fitted with a stirring bar, and carboxylic acid (10 mmol) and DCM (0.25 M) were added. The acid dissolved in DCM to give a solution. Subsequently, N, N'-Carbonyldiimidazole (15 mmol, 1.5 equiv) was slowly added in several portions. The reaction mixture was stirred at room temperature for 1 h, then N, O-dimethylhydroxylamine hydrochloride (12 mmol, 1.2 equiv) was slowly added and the flask was sealed with a rubber septum equipped with a deflated balloon. The mixture was stirred at room temperature for 1-2 days and monitored by TLC. The reaction was quenched with an aqueous solution of saturated NaHCO<sub>3</sub>. Then the aqueous layers were extracted with ethyl acetate. The combined organic layers were washed with brine and dried over Na<sub>2</sub>SO<sub>4</sub>. Then the solution was filtered, and concentrated to give the crude Weinreb amide which was used in the next step without further purification.

#### Step 2

To a 100 mL flask was added the crude Weinreb amide (10 mmol). The flask was backfilled with nitrogen (3 times). Dry THF (0.5 M) was added, then the solution was cooled to 0 °C, and Grignard reagent (12 mmol, 1.2 equiv) was added dropwise. The reaction was warmed to room temperature and stirred for 12 h. The reaction was quenched with an aqueous solution of saturated NH<sub>4</sub>Cl. The aqueous layers were extracted with ethyl acetate. The combined organic layers were dried over Na<sub>2</sub>SO<sub>4</sub>. Then the solution was filtered, and concentrated to give the crude ketone, which was purified by flash chromatography to be used in the next step.

#### Step 3

A mixture of ketone (5 mmol), hydroxylamine hydrochloride (7.5 mmol, 1.5 equiv), and NaOAc (10 mmol, 2 equiv) was dissolved in EtOH/H<sub>2</sub>O (25 mL/25 mL). The mixture was stirred at room temperature for 3-4 h. Then EtOH was removed by concentration, and the residue was diluted

with 1N HCl and ethyl acetate. The organic layer was separated and the aqueous layer was extracted with ethyl acetate. The combined organic layers were washed with saturated NaHCO<sub>3</sub> solution, and brine, and dried over Na<sub>2</sub>SO<sub>4</sub>. The combined organic solution was concentrated by rotary evaporation to give the crude hydroxyl oxime, which was used in the next step without further purification.

#### Step 4

To a mixture of hydroxyl oxime (~5 mmol, 1 equiv), triethylamine (10 mmol, 2 equiv), and DCM (0.5 M) was added Acyl chloride (7.5 mmol, 1.5 equiv) at 0 °C. Then, the reaction mixture was stirred at room temperature for 0.5 h under a nitrogen atmosphere. The reaction was quenched with an aqueous solution of saturated NaHCO<sub>3</sub>. The aqueous layer was extracted with DCM. The combined organic layers were washed with brine and dried over Na<sub>2</sub>SO<sub>4</sub>. The crude product was purified by flash chromatography on silica gel to give the final oxime ester.

#### Method B :

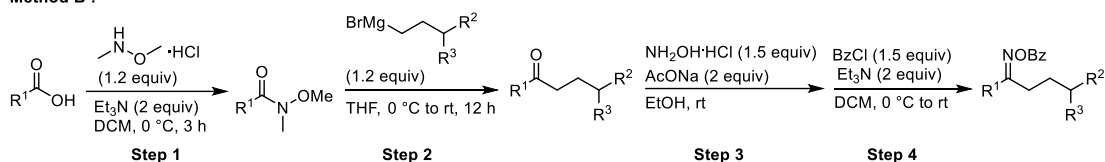

#### Method B

##### Step 1

A 100 mL three-necked flask was charged with *N, O*-dimethylhydroxylamine hydrochloride (12 mmol, 1.2 equiv), and the flask was evacuated and backfilled with nitrogen (3 times). Dry DCM (0.25 M) was added, and after cooling to 0 °C, triethylamine (20 mmol, 2 equiv) was subsequently added followed by the dropwise addition of carboxylic acid (10 mmol). The mixture was then slowly warmed to room temperature and stirred for 3 h before being quenched with saturated NaHCO<sub>3</sub>. The aqueous layers were extracted with ethyl acetate. The combined organic layers were washed with brine and dried over Na<sub>2</sub>SO<sub>4</sub>. Then the solution was filtered, and concentrated to give the crude Weinreb amide, which was used in the next step without further purification. The final oxime ester was prepared according to steps 2-4 of Method A.

#### Method C :

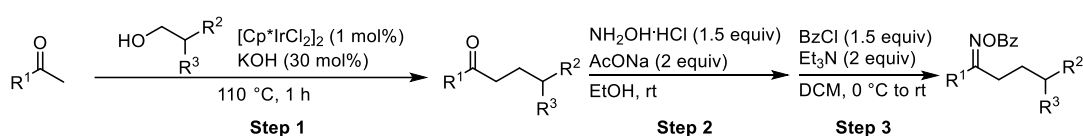

#### Method C

##### Step 1

A mixture of ketone (10 mmol), primary alcohol (15 mmol, 1.5 equiv), [Cp\*IrCl<sub>2</sub>]<sub>2</sub> (1 mol%) and KOH (3 mmol) was placed in a 50 mL screw-capped flask under nitrogen. The reaction mixture was allowed to react at 110 °C for 1 h. The reaction was quenched by adding water and the aqueous phase was extracted with ethyl acetate. The combined organic layers were washed with 1N HCl and brine, and then dried over Na<sub>2</sub>SO<sub>4</sub>. The crude product was purified by flash chromatography to give the ketone. The final oxime ester was prepared according to steps 3-4 of Method A.



**Method D :**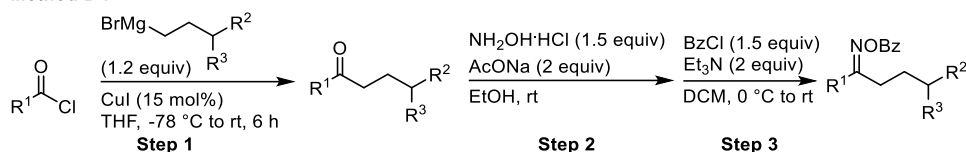**Method D****Step 1**

To a 100 mL three-necked flask was added CuI (1.5 mmol, 15 mol%), and the flask was evacuated and backfilled with nitrogen (3 times). Dry THF (0.5 M) and acid chloride (10 mmol) were added. The solution was cooled to  $-78^\circ C$  and Grignard reagent (12 mmol, 1.2 equiv) was added dropwise. Then the mixture was warmed to room temperature and stirred for 6 h. The reaction was quenched with an aqueous solution of saturated  $NH_4Cl$ . The aqueous layer was extracted with ethyl acetate. The combined organic layer was washed with brine and dried over  $Na_2SO_4$ . Subsequently, the solution was filtered, and concentrated to give the crude ketone, which was used in the next step without further purification. The final oxime ester was prepared according to steps 3-4 of Method A.

**Oxime Esters**

Substrates (**1**, **95**, **S4**, **S5**, **S9**, **S12**, **S14-16**, **S24**, **S25**, **S98**, **S99**, **S104**, **S121**, **S122**) were prepared according to Method A reported in the literature,<sup>4,6</sup> substrates (**S6-8**, **S10**, **S11**, **S13**, **S17**, **S18**, **S28**, **S29**, **S100-103**) were prepared according to Method B reported in the literature,<sup>3</sup> substrates (**87**, **S21**, **S22**, **S106**) were prepared according to Method C reported in the literature,<sup>3,7</sup> substrates (**S19**, **S20**, **S105**) were prepared according to Method D reported in the literature,<sup>2,3,5,10</sup> substrates (**S23**, **S26**, **S27**) were prepared according to Method A' reported in the literature.<sup>4,6</sup>

**73** was synthesized according to the literature with some variations.<sup>8,9</sup>

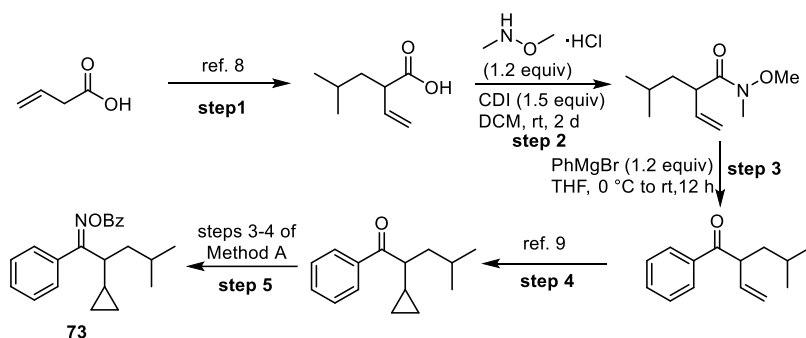

**Step 1.** A solution of commercial LDA (2 M in THF, 11.8 mL, 23.5 mmol, 2 equiv) was cooled to ice-water temperature, and a solution of 3-butenic acid (1 mL, 11.77 mmol) in 10 mL of THF was added slowly over 15 min. The resulting mixture was stirred at the same temperature for 45 min to obtain a deep yellow solution. A total of the alkylating agent (12.9 mmol, 1.1 equiv) was added, whereupon the reaction mixture immediately turned colorless. After stirring for 30 min at the same temperature and 1 h at room temperature, the pH of the solution was adjusted to 2.5 with 10% HCl. The organic phase was separated. The aqueous layer was saturated with solid NaCl and

the mixture was extracted with ethyl acetate. The combined organic layers were dried over anhydrous Na<sub>2</sub>SO<sub>4</sub> and filtered. Removal of solvents under reduced pressure followed by chromatography on silica gel produced the targeted 4-methyl-2-vinylpentanoic acid.

**Steps 2-3** were performed according to steps 1-2 of Method A' to afford 4-methyl-1-phenyl-2-vinylpentan-1-one.

**Step 4.** A dried 100 mL round bottom flask was charged with a stir bar, and DCM (10 mL) under nitrogen atmosphere was added and cooled to -40 °C. ZnEt<sub>2</sub> (1.0 M, 4 mL, 4 mmol, 2 equiv) was added followed by a solution of TFA (3.3 mL, 4 mmol, 2.0 equiv) in DCM (10 mL). The reaction mixture was stirred at this temperature for 1 h followed by warming to -10 °C. Next, CH<sub>2</sub>I<sub>2</sub> (4 mmol, 2.0 equiv) was dropwise into the reaction mixture and the resulting solution was allowed to stir at -10 °C for another 1 h. A solution of 4-methyl-1-phenyl-2-vinylpentan-1-one (2 mmol, 1.0 equiv) in DCM (5 mL) was then added, and the reaction mixture was allowed to warmed to room temperature and stirred for 16 h. The reaction was quenched by saturated NH<sub>4</sub>Cl (3 mL) and extracted with DCM (5 mL× 3). The combined organic layers were washed with aqueous NaHCO<sub>3</sub> and brine, dried over Na<sub>2</sub>SO<sub>4</sub>, filtered, concentrated, and purified by flash chromatography (Petroleum ether/Ethyl acetate = 100:1) to afford 2-cyclopropyl-4-methyl-1-phenylpentan-1-one.

**Step 5** was performed according to steps 3-4 of Method A to give the final oxime ester **73**.

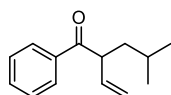

#### 4-methyl-1-phenyl-2-vinylpentan-1-one:

Colorless oil (1.07 g, 5.3 mmol, 45% yield over steps 1-3; R<sub>f</sub> = 0.7 (Petroleum ether/Ethyl acetate = 10:1); **<sup>1</sup>H NMR** (600 MHz, CDCl<sub>3</sub>) δ 8.00 – 7.96 (m, 2H), 7.55 (t, *J* = 7.4 Hz, 1H), 7.46 (t, *J* = 7.7 Hz, 2H), 5.88 (ddd, *J* = 17.3, 10.1, 8.8 Hz, 1H), 5.16 (d, *J* = 17.5 Hz, 1H), 5.13 (d, *J* = 10.2 Hz, 1H), 4.18 – 4.12 (m, 1H), 1.78 – 1.72 (m, 1H), 1.67 – 1.61 (m, 1H), 1.56 – 1.50 (m, 1H), 0.93 (d, *J* = 6.5 Hz, 3H), 0.90 (d, *J* = 6.6 Hz, 3H); **<sup>13</sup>C NMR** (151 MHz, CDCl<sub>3</sub>) δ 201.1, 137.4, 136.9, 132.9, 128.6, 128.4, 117.3, 49.8, 41.1, 25.6, 23.0, 22.2; **HRMS** (ESI) *m/z*: [M + Na]<sup>+</sup> calcd. for C<sub>14</sub>H<sub>18</sub>NaO 225.1250; found 225.1251.

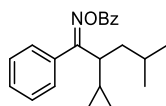

#### 2-cyclopropyl-4-methyl-1-phenylpentan-1-one O-benzoyl oxime (**73**):

Colorless oil (203.0 mg, 0.6 mmol, 30% yield over steps 4-5; R<sub>f</sub> = 0.5 (Petroleum ether/Ethyl acetate = 10:1); **<sup>1</sup>H NMR** (600 MHz, CDCl<sub>3</sub>) δ 8.07 (d, *J* = 7.6 Hz, 2H), 7.64 – 7.56 (m, 3H), 7.50 (t, *J* = 7.5 Hz, 2H), 7.45–7.37 (m, 3H), 2.90 – 2.77 (m, 1H), 1.80 – 1.71 (m, 2H), 1.66 – 1.60 (m, 1H), 1.00 – 0.93 (m, 1H), 0.90 (d, *J* = 5.8 Hz, 6H), 0.71 – 0.71 (m, 1H), 0.54 – 0.46 (m, 1H), 0.37 – 0.24 (m, 2H); **<sup>13</sup>C NMR** (151 MHz, CDCl<sub>3</sub>) δ 171.6, 163.9, 133.3, 129.6, 129.5, 129.3, 128.6, 128.4, 128.3, 42.1, 26.0, 23.0, 22.6, 14.1, 6.9, 3.9; **HRMS** (ESI) *m/z*: [M + Na]<sup>+</sup> calcd. for C<sub>22</sub>H<sub>25</sub>NNaO<sub>2</sub> 358.1778; found 358.1778.

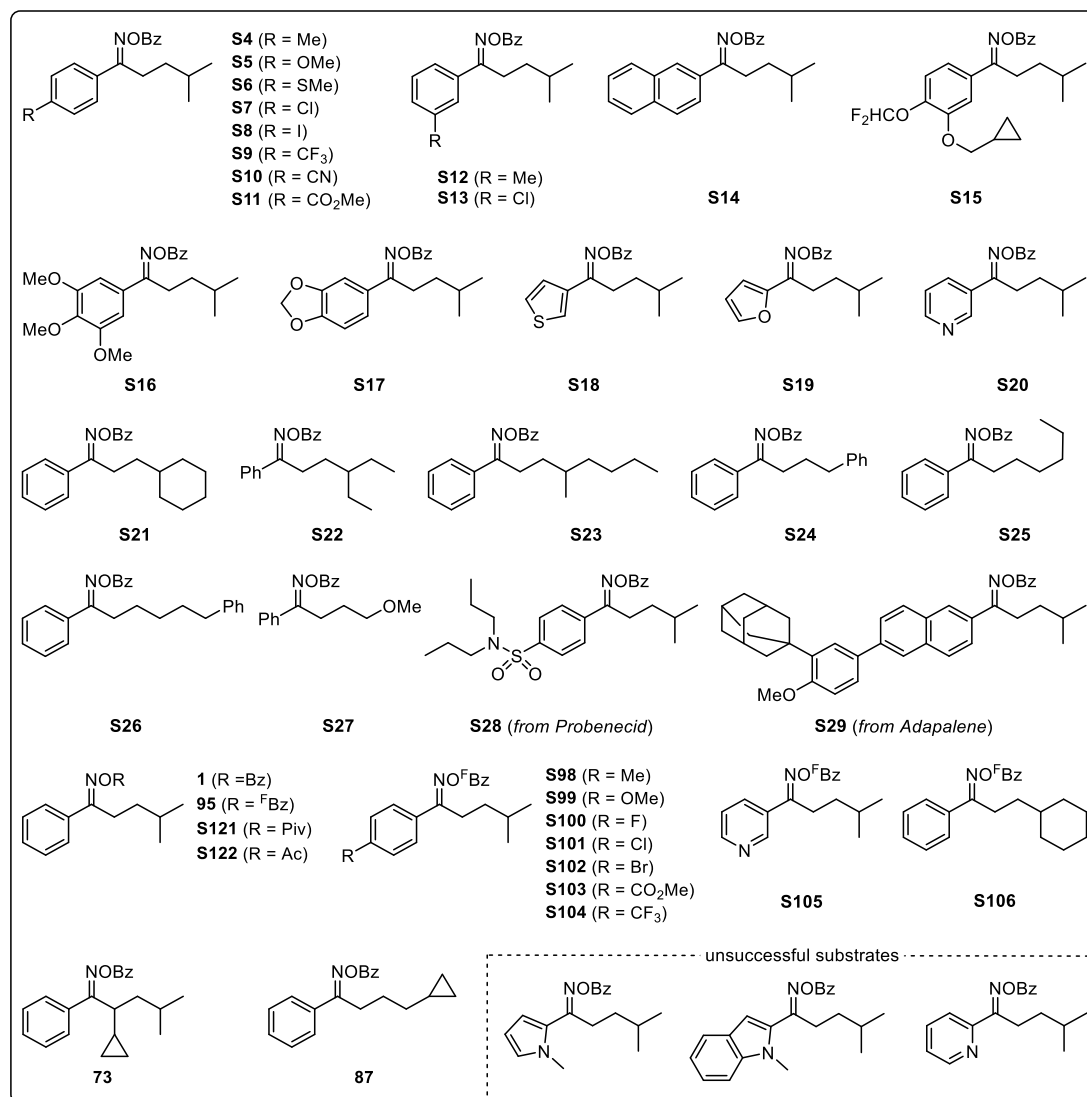

**Scheme S1.** Oxime ester substrates used in the reactions.

## The Characterization Data for Oxime Esters

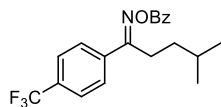

### 4-methyl-1-(4-(trifluoromethyl)phenyl)pentan-1-one O-benzoyl oxime (S9):

White solid (1.20 g, 66% yield over steps 3-4);  $R_f = 0.5$  (Petroleum ether/Ethyl acetate = 10:1);  $M_p = 45 - 46\text{ }^\circ\text{C}$ ;  $^1\text{H NMR}$  (600 MHz,  $\text{CDCl}_3$ )  $\delta$  8.13 (d,  $J = 7.6$  Hz, 2H), 7.91 (d,  $J = 8.1$  Hz, 2H), 7.70 (d,  $J = 8.1$  Hz, 2H), 7.63 (t,  $J = 7.4$  Hz, 1H), 7.51 (t,  $J = 7.5$  Hz, 2H), 3.01 – 2.96 (m, 2H), 1.75 – 1.67 (m, 1H), 1.57 – 1.52 (m, 2H), 0.98 (d,  $J = 6.6$  Hz, 6H);  $^{13}\text{C NMR}$  (151 MHz,  $\text{CDCl}_3$ )  $\delta$  166.5, 163.7, 137.7, 133.5, 132.4 (q,  $^2J_{\text{C-F}} = 32.8$  Hz), 129.6, 128.7, 127.8, 125.7 (q,  $^3J_{\text{C-F}} = 3.8$  Hz), 124.74, 123.8 (q,  $^1J_{\text{C-F}} = 272.6$  Hz), 28.5, 26.8, 22.3;  $^{19}\text{F NMR}$  (565 MHz,  $\text{CDCl}_3$ )  $\delta$  -62.90; **HRMS** (ESI)  $m/z$ :  $[\text{M} + \text{H}]^+$  calcd. for  $\text{C}_{20}\text{H}_{21}\text{F}_3\text{NO}_2$  364.1519; found 364.1520.

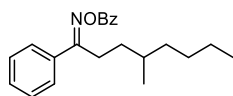

### 4-methyl-1-phenyloctan-1-one O-benzoyl oxime (S23):

White solid (1.18 g, 70% yield over steps 3-4);  $R_f = 0.5$  (Petroleum ether/Ethyl acetate = 10:1);  $M_p = 35 - 36\text{ }^\circ\text{C}$ ;  $^1\text{H NMR}$  (600 MHz,  $\text{CDCl}_3$ )  $\delta$  8.13 (d,  $J = 7.5$  Hz, 2H), 7.79 (d,  $J = 7.0$  Hz, 2H), 7.62 (t,  $J = 7.4$  Hz, 1H), 7.50 (t,  $J = 7.7$  Hz, 2H), 7.47 – 7.41 (m, 3H), 3.01 – 2.91 (m, 2H), 1.70 – 1.63 (m, 1H), 1.57 – 1.45 (m, 2H), 1.39 – 1.32 (m, 1H), 1.32 – 1.23 (m, 4H), 1.21 – 1.18 (m, 1H), 0.97 (d,  $J = 6.5$  Hz, 3H), 0.85 (t,  $J = 6.8$  Hz, 3H);  $^{13}\text{C NMR}$  (151 MHz,  $\text{CDCl}_3$ )  $\delta$  167.9, 163.9, 134.2, 133.3, 130.6, 129.6, 128.7, 128.6, 127.4, 36.3, 33.8, 33.3, 29.2, 26.6, 22.9, 19.5, 14.1; **HRMS** (ESI)  $m/z$ :  $[\text{M} + \text{H}]^+$  calcd. for  $\text{C}_{22}\text{H}_{28}\text{NO}_2$  338.2115; found 338.2115.

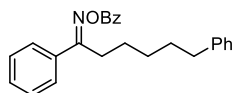

### 1,6-diphenylhexan-1-one O-benzoyl oxime (S26):

Colorless oil (1.45 g, 78% yield over steps 3-4);  $R_f = 0.4$  (Petroleum ether/Ethyl acetate = 10:1);  $^1\text{H NMR}$  (600 MHz,  $\text{CDCl}_3$ )  $\delta$  8.10 (d,  $J = 7.7$  Hz, 2H), 7.78 (d,  $J = 7.3$  Hz, 2H), 7.61 (t,  $J = 7.4$  Hz, 1H), 7.49 – 7.45 (m, 3H), 7.43 (t,  $J = 7.3$  Hz, 2H), 7.25 – 7.22 (m, 2H), 7.16 (t,  $J = 7.2$  Hz, 1H), 7.11 (d,  $J = 7.4$  Hz, 2H), 2.97 (m, t,  $J = 7.8$  Hz, 2H), 2.58 (t,  $J = 7.6$  Hz, 2H), 1.73 – 1.63 (m, 4H), 1.51 – 1.44 (m, 2H);  $^{13}\text{C NMR}$  (151 MHz,  $\text{CDCl}_3$ )  $\delta$  167.5, 163.9, 142.3, 134.1, 133.3, 130.6, 129.6, 128.7, 128.6, 128.4, 128.3, 127.4, 125.7, 35.7, 31.1, 29.3, 28.6, 26.7; **HRMS** (ESI)  $m/z$ :  $[\text{M} + \text{H}]^+$  calcd. for  $\text{C}_{25}\text{H}_{26}\text{NO}_2$  372.1958; found 372.1957.

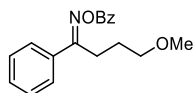

### 4-methoxy-1-phenylbutan-1-one O-benzoyl oxime (S27):

Yellow oil (1.07 g, 72% yield over steps 3-4);  $R_f = 0.33$  (Petroleum ether/Ethyl acetate = 10:1);  $^1\text{H NMR}$  (600 MHz,  $\text{CDCl}_3$ )  $\delta$  8.16 (d,  $J = 7.3$  Hz, 2H), 7.83 (d,  $J = 6.9$  Hz, 2H), 7.61 (t,  $J = 7.4$  Hz, 1H), 7.50 (t,  $J = 7.7$  Hz, 2H), 7.47 – 7.40 (m, 3H), 3.43 (t,  $J = 5.9$  Hz, 2H), 3.29 (s, 3H), 3.10 (t,  $J = 7.8$  Hz, 2H), 1.98 – 1.91 (m, 2H);  $^{13}\text{C NMR}$  (151 MHz,  $\text{CDCl}_3$ )  $\delta$  167.10, 163.82, 133.99, 133.30, 130.65, 129.71, 129.22, 128.67, 128.60, 127.42, 77.27, 77.06, 76.85, 71.54, 58.62, 27.10,

25.40; **HRMS** (ESI)  $m/z$ :  $[M + H]^+$  calcd. for  $C_{18}H_{20}NO_3$  298.1438; found 298.1439.

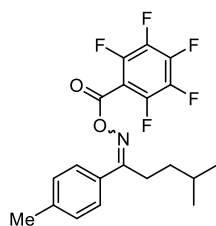

**4-methyl-1-(p-tolyl)pentan-1-one O-perfluorobenzoyl oxime (S98)**

White solid (1.28 g, 64% yield over steps 3-4);  $R_f$  = 0.67 (Petroleum ether/Ethyl acetate = 10:1);  $M_p$  = 62 – 63 °C;  **$^1H$  NMR** (600 MHz,  $CDCl_3$ )  $\delta$  7.64 (d,  $J$  = 7.5 Hz, 2H), 7.24 (d,  $J$  = 7.6 Hz, 2H), 2.90 – 2.81 (m, 2H), 2.40 (s, 3H), 1.67 – 1.60 (m, 1H), 1.48 – 1.42 (m, 2H), 0.91 (d,  $J$  = 6.2 Hz, 6H);  **$^{13}C$  NMR** (151 MHz,  $CDCl_3$ )  $\delta$  169.1, 156.7, 146.3 (m), 142.5 (m), 141.5, 137.0 (m), 130.3, 129.5, 127.3, 107.3 (m), 35.7, 28.4, 26.9, 22.1, 21.4;  **$^{19}F$  NMR** (565 MHz,  $CDCl_3$ )  $\delta$  -137.2 (m, 2F), -147.8 (m, F), -159.9 (m, 2F); **HRMS** (ESI)  $m/z$ :  $[M + H]^+$  calcd. for  $C_{20}H_{19}F_5NO_2$  400.1330; found 400.1330.

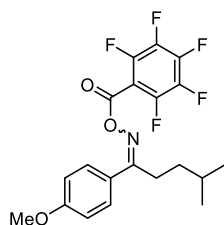

**1-(4-methoxyphenyl)-4-methylpentan-1-one O-perfluorobenzoyl oxime (S99):**

White solid (1.47 g, 71% yield over steps 3-4);  $R_f$  = 0.5 (Petroleum ether/Ethyl acetate = 10:1);  $M_p$  = 67 – 69 °C;  **$^1H$  NMR** (600 MHz,  $CDCl_3$ )  $\delta$  7.72 (d,  $J$  = 8.4 Hz, 2H), 6.95 (d,  $J$  = 8.4 Hz, 2H), 3.86 (s, 3H), 2.89 – 2.81 (m, 2H), 1.66 – 1.60 (m, 1H), 1.49 – 1.42 (m, 2H), 0.92 (d,  $J$  = 6.3 Hz, 6H);  **$^{13}C$  NMR** (151 MHz,  $CDCl_3$ )  $\delta$  168.5, 162.0, 156.7, 146.3 (m), 142.6 (m), 137.0 (m), 127.0, 125.3, 114.2, 107.3 (m), 55.4, 35.8, 28.5, 26.7, 22.1;  **$^{19}F$  NMR** (565 MHz,  $CDCl_3$ )  $\delta$  -137.3 (m, 2F), -147.9 (m, 1F), -160.0 (m, 2F); **HRMS** (ESI)  $m/z$ :  $[M + H]^+$  calcd. for  $C_{20}H_{19}F_5NO_3$  416.1280; found 416.1277.

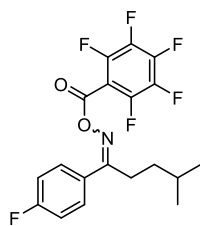

**1-(4-fluorophenyl)-4-methylpentan-1-one O-perfluorobenzoyl oxime (S100):**

White solid (1.67 g, 83% yield over steps 3-4);  $R_f$  = 0.67 (Petroleum ether/Ethyl acetate = 10:1);  $M_p$  = 41 – 42 °C;  **$^1H$  NMR** (600 MHz,  $CDCl_3$ )  $\delta$  7.80 – 7.72 (m, 2H), 7.17 – 7.10 (m, 2H), 2.90 – 2.82 (m, 2H), 1.68 – 1.60 (m, 1H), 1.49 – 1.42 (m, 2H), 0.92 (d,  $J$  = 6.6 Hz, 6H);  **$^{13}C$  NMR** (151 MHz,  $CDCl_3$ )  $\delta$  168.1, 164.5 (d,  $^1J_{C-F}$  = 252.0 Hz), 156.5, 137.0 (m), 129.5 (d,  $^3J_{C-F}$  = 8.7 Hz), 129.3, 116.0 (d,  $^2J_{C-F}$  = 21.8 Hz), 107.0 (m), 35.5, 28.4, 27.0, 22.1;  **$^{19}F$  NMR** (565 MHz,  $CDCl_3$ )  $\delta$  -108.8 (s, 1F), -137.1 (m, 2F), -147.4 (m, 1F), -159.8 (m, 2F); **HRMS** (ESI)  $m/z$ :  $[M + H]^+$  calcd. for  $C_{19}H_{16}F_6NO_2$  404.1080; found 404.1079.

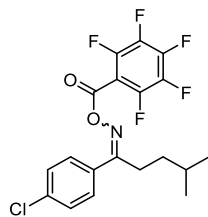

**1-(4-chlorophenyl)-4-methylpentan-1-one O-perfluorobenzoyl oxime (S101):**

White solid (1.57 g, 75% yield over steps 3-4);  $R_f = 0.67$  (Petroleum ether/Ethyl acetate = 10:1);  $M_p = 50 - 51\text{ }^\circ\text{C}$ ;  $^1\text{H NMR}$  (600 MHz,  $\text{CDCl}_3$ )  $\delta$  7.70 (d,  $J = 8.3$  Hz, 2H), 7.42 (d,  $J = 8.2$  Hz, 2H), 2.90 – 2.81 (m, 2H), 1.67 – 1.60 (m, 1H), 1.48 – 1.41 (m, 2H), 0.92 (d,  $J = 6.5$  Hz, 6H);  $^{13}\text{C NMR}$  (151 MHz,  $\text{CDCl}_3$ )  $\delta$  168.1, 156.5, 146.4 (m), 137.3, 131.7, 129.1, 128.7, 107.0 (m), 35.5, 28.4, 26.8, 22.1;  $^{19}\text{F NMR}$  (565 MHz,  $\text{CDCl}_3$ )  $\delta$  -137.08 (m, 2F), -147.3 (m, 1F), -159.7 (m, 2F); **HRMS** (ESI)  $m/z$ :  $[M + H]^+$  calcd. for  $\text{C}_{19}\text{H}_{16}\text{ClF}_5\text{NO}_2$  420.0784; found 420.0784.

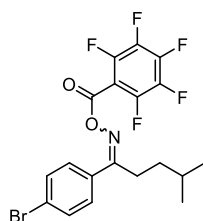

**1-(4-bromophenyl)-4-methylpentan-1-one O-perfluorobenzoyl oxime (S102):**

White solid (1.51 g, 65% yield over steps 3-4);  $R_f = 0.67$  (Petroleum ether/Ethyl acetate = 10:1);  $M_p = 66 - 67\text{ }^\circ\text{C}$ ;  $^1\text{H NMR}$  (600 MHz,  $\text{CDCl}_3$ )  $\delta$  7.63 (d,  $J = 7.9$  Hz, 2H), 7.58 (d,  $J = 7.5$  Hz, 2H), 2.89 – 2.81 (m, 2H), 1.68 – 1.60 (m, 1H), 1.48 – 1.40 (m, 2H), 0.92 (d,  $J = 6.3$  Hz, 6H);  $^{13}\text{C NMR}$  (151 MHz,  $\text{CDCl}_3$ )  $\delta$  168.2, 156.5, 146.4 (m), 142.7 (m), 137.0 (m), 132.1, 132.1, 128.9, 125.7, 107.0 (m), 35.5, 28.4, 26.8, 22.1;  $^{19}\text{F NMR}$  (565 MHz,  $\text{CDCl}_3$ )  $\delta$  -137.1 (m, 2F), -147.3 (m, 1F), -159.7 (m, 2F); **HRMS** (ESI)  $m/z$ :  $[M + H]^+$  calcd. for  $\text{C}_{19}\text{H}_{16}\text{BrF}_5\text{NO}_2$  464.0279; found 464.0278.

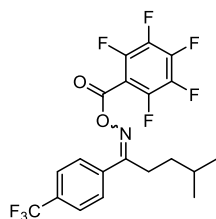

**4-methyl-1-(4-(trifluoromethyl)phenyl)pentan-1-one O-perfluorobenzoyl oxime (S104):**

White solid (1.63 g, 72% yield over steps 3-4);  $R_f = 0.67$  (Petroleum ether/Ethyl acetate = 10:1);  $M_p = 50 - 51\text{ }^\circ\text{C}$ ;  $^1\text{H NMR}$  (600 MHz,  $\text{CDCl}_3$ )  $\delta$  7.87 (d,  $J = 7.6$  Hz, 2H), 7.71 (d,  $J = 7.6$  Hz, 2H), 2.94 – 2.86 (m, 2H), 1.68 – 1.60 (m, 1H), 1.49 – 1.42 (m, 2H), 0.93 (d,  $J = 6.1$  Hz, 6H);  $^{13}\text{C NMR}$  (151 MHz,  $\text{CDCl}_3$ )  $\delta$  168.0, 156.4, 146.5 (m), 136.8, 132.8 (q,  $^2J_{\text{C-F}} = 32.8$  Hz), 127.8, 125.8 (q,  $^3J_{\text{C-F}} = 3.8$  Hz), 123.7 (q,  $^1J_{\text{C-F}} = 272.7$  Hz), 35.4, 28.4, 27.0, 22.1;  $^{19}\text{F NMR}$  (565 MHz,  $\text{CDCl}_3$ )  $\delta$  -63.00 (s, 3F), -136.97 (m, 2F), -147.05 (m, 1F), -159.6 (m, 2F); **HRMS** (ESI)  $m/z$ :  $[M + \text{Na}]^+$  calcd. for  $\text{C}_{20}\text{H}_{15}\text{F}_8\text{NNaO}_2$  476.0867; found 476.0867.

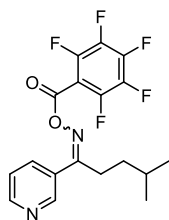

**4-methyl-1-(pyridin-3-yl)pentan-1-one O-perfluorobenzoyl oxime (S105):**

White solid (1.14 g, 59% yield over steps 3-4);  $R_f = 0.3$  (Petroleum ether/Ethyl acetate = 10:1);  $M_p = 38 - 39\text{ }^\circ\text{C}$ ;  $^1\text{H NMR}$  (600 MHz,  $\text{CDCl}_3$ )  $\delta$  8.96 (s, 1H), 8.74 (d,  $J = 4.1$  Hz, 1H), 8.14 (d,  $J = 7.0$  Hz, 1H), 7.46 – 7.37 (m, 1H), 2.96 – 2.86 (m, 2H), 1.70 – 1.60 (m, 1H), 1.53 – 1.41 (m, 2H), 0.93 (d,  $J = 6.3$  Hz, 6H);  $^{13}\text{C NMR}$  (151 MHz,  $\text{CDCl}_3$ )  $\delta$  166.9, 156.4, 151.6, 148.1, 146.5 (m), 142.8 (m), 137.0 (m), 135.2, 129.5, 123.8, 106.7 (m), 35.3, 28.4, 26.8, 22.1;  $^{19}\text{F NMR}$  (565 MHz,  $\text{CDCl}_3$ )  $\delta$  -137.0 (m, 2F), -147.0 (m, 1F), -159.6 (m, 2F); **HRMS** (ESI)  $m/z$ :  $[\text{M} + \text{H}]^+$  calcd. for  $\text{C}_{18}\text{H}_{16}\text{F}_5\text{N}_2\text{O}_2$  387.1126; found 387.1125.

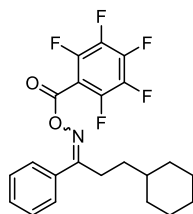

**3-cyclohexyl-1-phenylpropan-1-one O-perfluorobenzoyl oxime (S106):**

White solid (1.66 g, 78% yield over steps 3-4);  $R_f = 0.67$  (Petroleum ether/Ethyl acetate = 10:1);  $M_p = 93 - 95\text{ }^\circ\text{C}$ ;  $^1\text{H NMR}$  (600 MHz,  $\text{CDCl}_3$ )  $\delta$  7.74 (d,  $J = 7.4$  Hz, 2H), 7.51 – 7.46 (m, 1H), 7.44 (t,  $J = 7.1$  Hz, 2H), 2.92 – 2.84 (m, 2H), 1.75 – 1.60 (m, 5H), 1.50 – 1.40 (m, 2H), 1.35 – 1.25 (s, 1H), 1.25 – 1.07 (m, 3H), 0.95 – 0.85 (m, 2H);  $^{13}\text{C NMR}$  (151 MHz,  $\text{CDCl}_3$ )  $\delta$  169.3, 156.7, 146.3 (m), 142.6 (m), 137.0 (m), 133.3, 131.0, 128.8, 127.4, 107.3 (m), 38.0, 34.1, 32.9, 26.6, 26.5, 26.2;  $^{19}\text{F NMR}$  (565 MHz,  $\text{CDCl}_3$ )  $\delta$  -137.15 (m, 2F), -147.72 (m, 1F), -159.87 (m, 2F); **HRMS** (ESI)  $m/z$ :  $[\text{M} + \text{H}]^+$  calcd. for  $\text{C}_{22}\text{H}_{21}\text{F}_5\text{NO}_2$  426.1487; found 426.1485.

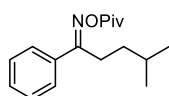

**4-methyl-1-phenylpentan-1-one O-pivaloyl oxime (S121):**

White solid (1.10 g, 80% yield over steps 3-4);  $R_f = 0.7$  (Petroleum ether/Ethyl acetate = 10:1);  $M_p = 48 - 49\text{ }^\circ\text{C}$ ;  $^1\text{H NMR}$  (600 MHz,  $\text{CDCl}_3$ )  $\delta$  7.73 (d,  $J = 7.5$  Hz, 2H), 7.45 – 7.39 (m, 3H), 2.85 – 2.80 (m, 2H), 1.70 – 1.62 (m, 1H), 1.50 – 1.44 (m, 2H), 1.34 (s, 9H), 0.95 (d,  $J = 6.6$  Hz, 6H);  $^{13}\text{C NMR}$  (151 MHz,  $\text{CDCl}_3$ )  $\delta$  175.1, 167.2, 134.3, 130.4, 128.6, 127.3, 38.8, 35.6, 28.6, 27.3, 26.7, 22.3; **HRMS** (ESI)  $m/z$ :  $[\text{M} + \text{H}]^+$  calcd. for  $\text{C}_{17}\text{H}_{26}\text{NO}_2$  276.1958; found 276.1960.

## General Procedures for the Synthesis of Enals

All enals were synthesized according to general procedures (Methods A, B, C, D) reported in the literature<sup>11-18</sup> with slight modifications. The characterization data of newly synthesized substrates were summarized below. <sup>1</sup>H, <sup>13</sup>C NMR and <sup>19</sup>F NMR spectra data for the rest of known ones were in agreement with the literature data. Some substrates of them were synthesized according to additional procedures given in the Supporting Information.

### Method A :

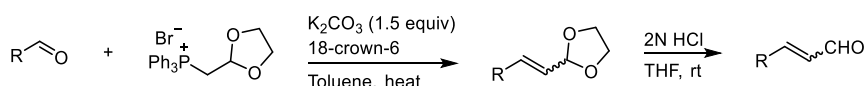

### Method B :

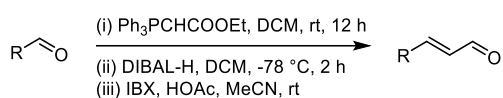

### Method C :

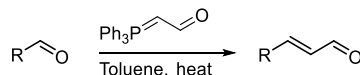

### Method D :

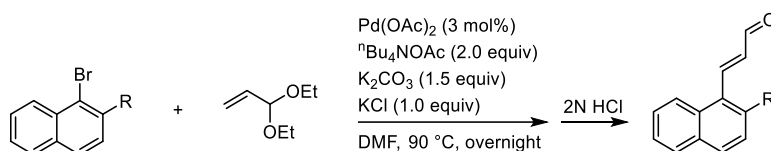

### Method A

According to the procedures reported in the literature<sup>11</sup>, a 100 mL round bottom flask was charged with carbonyl compound (5 mmol, 1.0 equiv), 18-crown-6 (2 mol%), (1,3-dioxolan-2-ylmethyl)triphenylphosphonium bromide (7.5 mmol, 1.5 equiv), K<sub>2</sub>CO<sub>3</sub> (7.5 mmol, 1.5 equiv), and toluene (20 mL). Then the reaction mixture was heated at 100 °C with stirring for 18 h. After cooling to room temperature, the solvent was evaporated in vacuo. The reaction mixture was then diluted with deionized water, followed by extraction with ethyl acetate (2 × 20 mL). The combined organic phases were dried over Na<sub>2</sub>SO<sub>4</sub>, then concentrated in vacuo to give the crude acetal product, which was used in the next step without any further purification. The crude acetal was added to tetrahydrofuran (20 mL), followed by 2N HCl. The reaction was stirred at room temperature for 6 h. Then, the solvent was evaporated in vacuo. The reaction mixture was diluted with deionized water, followed by extraction with ethyl acetate (2 × 20 mL). The combined organic phases were dried over Na<sub>2</sub>SO<sub>4</sub>, and concentrated in vacuo. The residue was then purified by flash chromatography on silica gel to give the desired cinnamaldehyde product.

### Method B

According to the procedures reported in the literature<sup>12,13</sup> with slight modification, to a stirred solution of the appropriate aldehyde (5 mmol, 1.0 equiv) in DCM (0.5 M) was added ethyl (triphenylphosphoranylidene)acetate (5.5 mmol, 1.1 equiv) by portions. The resulting solution was stirred at room temperature for 12 hours. The volatiles were removed under vacuum and a mixture of petroleum ether/Et<sub>2</sub>O (4/1, 25 mL) was added to the solid obtained. The white solid (Ph<sub>3</sub>PO) was filtered off and washed thoroughly with petroleum ether/Et<sub>2</sub>O (1/1). The solvents were removed under vacuum and the crude residue was washed on a short pad of SiO<sub>2</sub> eluting with petroleum ether/Et<sub>2</sub>O (4/1). The α,β-unsaturated ester was used in the next step without further



purification.

The  $\alpha,\beta$ -unsaturated ester (~ 5 mmol) was dissolved in DCM (0.5 M) and the resulting solution was cooled down to  $-78\text{ }^{\circ}\text{C}$ . DIBAL-H solution (1.0 M in hexanes, 11 mmol, 2.2 equiv) was added dropwise over 15 min. The reaction was stirred at the same temperature for 2 h at which point water (5 mL) was added. The solution was allowed to warm up to room temperature then a NaOH solution (10% in water, 20 mL) was added followed by water (10 mL). The suspension was stirred vigorously for 1 h, diluted with water. Then the aqueous layers were extracted with DCM. The combined organic layers were washed with brine, dried over  $\text{Na}_2\text{SO}_4$ , filtered, and concentrated to give the crude allylic alcohol which was used in the next step without further purification.

A suspension of the allylic alcohol (1 equiv), IBX (1.2 equiv), and acetic acid (1.2 equiv) in acetonitrile (20 mL) was stirred vigorously at room temperature. The reaction progress was monitored by a TLC plate. After completion of the reaction, excess sodium bicarbonate was added to the mixture. The resulting mixture was passed through a short path of silica gel using ethyl acetate as the eluent. After the removal of the solvent, the residue was purified by flash chromatography on silica gel to afford the desired enal.

#### Method C

According to the procedures reported in the literature<sup>14</sup>, to a suspension of aldehyde (5 mmol, 1.0 equiv) in toluene (20.0 mL) was added 2- (triphenylphosphoranylidene)acetaldehyde (5.5 mmol, 1.1 equiv), the reaction mixture was heated to  $120\text{ }^{\circ}\text{C}$  (oil bath) and stirred for 4 h. Then the mixture was concentrated directly in vacuum and the residue was purified by silica gel chromatography to give the desired enal.

#### Method D

According to the procedures reported in the literature<sup>15</sup>, to a stirred solution of aryl bromide (5 mmol, 1 equiv) in 20 mL of DMF were added acrolein diethyl acetal (2.29 mL, 15 mmol),  $n\text{Bu}_4\text{NOAc}$  (3.02 g, 10 mmol),  $\text{K}_2\text{CO}_3$  (1.04 g, 7.5 mmol), KCl (0.37 g, 5 mmol), and  $\text{Pd}(\text{OAc})_2$  (0.03 g, 0.15 mmol). The mixture was stirred for 6 h at  $90\text{ }^{\circ}\text{C}$ . After cooling, 2N HCl was slowly added and the reaction mixture was stirred at room temperature for 20 min. Then, it was diluted with ethyl acetate and washed with water. The organic layer was dried over  $\text{Na}_2\text{SO}_4$  and concentrated under reduced pressure. The residue was purified by flash chromatography on silica gel to afford the desired cinnamaldehyde.

#### Enals

Substrates (**2**, **88**, **S30**, **S34**, **S36**, **S39**, **S48**, **S54**, **S56-58**) were purchased from commercial sources and used as received. Substrates (**S32**, **S33**, **S35**, **S37**, **S38**, **S40-47**, **S49-53**, **S59-62**, **S112**) were prepared according to Method A. Substrate **S113** was prepared according to Method B. Substrates (**80**, **S55**) were prepared according to Method C. Substrates (**96**, **S63**, **S107-111**, **S114-116**) were prepared according to Method D.

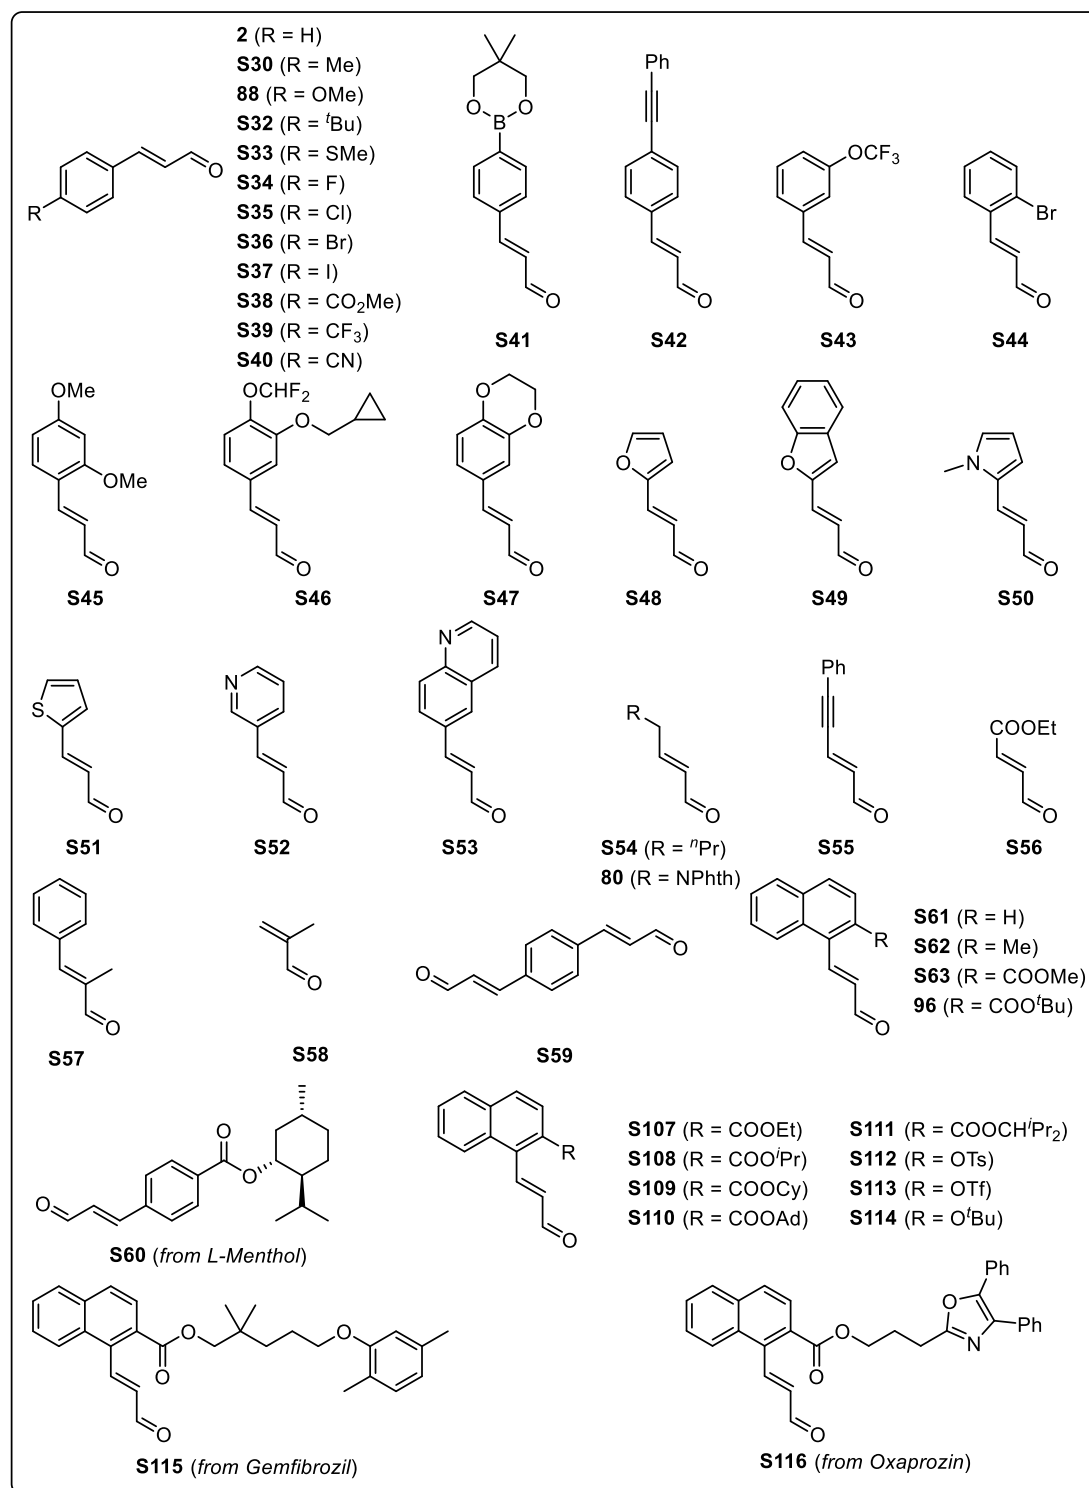

**Scheme S2.** Enal substrates used in the reactions.

## The Characterization Data for Enals

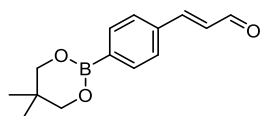

### (*E*)-3-(4-(5,5-dimethyl-1,3,2-dioxaborinan-2-yl)phenyl)acrylaldehyde (S41):

White solid (0.55 g, 45% yield);  $R_f$  = 0.3 (Petroleum ether/Ethyl acetate = 10:1);  $M_p$  = 93 – 95 °C;  $^1\text{H NMR}$  (600 MHz,  $\text{CDCl}_3$ )  $\delta$  9.64 (d,  $J$  = 7.7 Hz, 1H), 7.78 (d,  $J$  = 7.7 Hz, 2H), 7.47 (d,  $J$  = 7.7 Hz, 2H), 7.41 (d,  $J$  = 15.9 Hz, 1H), 6.68 (dd,  $J$  = 15.9, 7.7 Hz, 1H), 3.71 (s, 4H), 0.96 (s, 6H);  $^{13}\text{C NMR}$  (151 MHz,  $\text{CDCl}_3$ )  $\delta$  192.7, 151.8, 134.8, 133.5, 127.9, 126.5, 71.4, 30.9, 20.9; **HRMS** (ESI)  $m/z$ :  $[\text{M} + \text{Na}]^+$  calcd. for  $\text{C}_{14}\text{H}_{17}\text{BNaO}_3$  267.1163; found 267.1167.

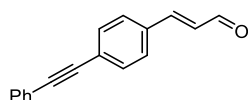

### (*E*)-3-(4-(phenylethynyl)phenyl)acrylaldehyde (S42):

White solid (0.72 g, 62% yield);  $R_f$  = 0.5 (Petroleum ether/Ethyl acetate = 10:1);  $M_p$  = 131 – 133 °C;  $^1\text{H NMR}$  (600 MHz,  $\text{CDCl}_3$ )  $\delta$  9.72 (d,  $J$  = 7.6 Hz, 1H), 7.58 (d,  $J$  = 8.0 Hz, 2H), 7.57 – 7.53 (m, 4H), 7.46 (d,  $J$  = 16.0 Hz, 1H), 7.39 – 7.34 (m, 3H), 6.73 (dd,  $J$  = 15.9, 7.6 Hz, 1H);  $^{13}\text{C NMR}$  (151 MHz,  $\text{CDCl}_3$ )  $\delta$  193.4, 151.6, 133.7, 132.2, 131.7, 129.0, 128.8, 128.5, 128.4, 126.3, 122.8, 92.3, 88.9; **HRMS** (ESI)  $m/z$ :  $[\text{M} + \text{H}]^+$  calcd. for  $\text{C}_{17}\text{H}_{13}\text{O}$  233.0961; found 233.0962.

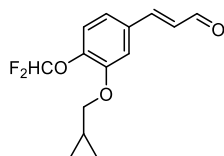

### (*E*)-3-(3-(cyclopropylmethoxy)-4-(difluoromethoxy)phenyl)acrylaldehyde (S46):

White solid (0.54 g, 40% yield);  $R_f$  = 0.3 (Petroleum ether/Ethyl acetate = 10:1);  $M_p$  = 60 – 61 °C;  $^1\text{H NMR}$  (600 MHz,  $\text{CDCl}_3$ )  $\delta$  9.69 (d,  $J$  = 7.5 Hz, 1H), 7.41 (d,  $J$  = 15.9 Hz, 1H), 7.21 (d,  $J$  = 8.0 Hz, 1H), 7.14 (d,  $J$  = 9.7 Hz, 2H), 6.69 (t,  $J$  = 75.0 Hz, 1H), 6.65 (dd,  $J$  = 15.9, 7.6 Hz, 1H), 3.92 (d,  $J$  = 6.9 Hz, 2H), 1.35 – 1.26 (m, 1H), 0.71 – 0.64 (m, 2H), 0.41 – 0.35 (m, 2H);  $^{13}\text{C NMR}$  (151 MHz,  $\text{CDCl}_3$ )  $\delta$  193.28, 151.4, 150.8, 142.7, 132.5, 128.8, 122.8, 122.2, 115.8 (t,  $^1J_{\text{C-F}}$  = 261.1 Hz), 113.4, 74.1, 10.1, 3.3;  $^{19}\text{F NMR}$  (565 MHz,  $\text{CDCl}_3$ )  $\delta$  -81.84; **HRMS** (ESI)  $m/z$ :  $[\text{M} + \text{H}]^+$  calcd. for  $\text{C}_{14}\text{H}_{15}\text{F}_2\text{O}_3$  269.0984; found 269.0985.

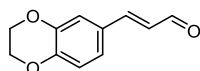

### (*E*)-3-(2,3-dihydrobenzo[b][1,4]dioxin-6-yl)acrylaldehyde (S47):

White solid (0.74 g, 78% yield);  $R_f$  = 0.3 (Petroleum ether/Ethyl acetate = 10:1);  $M_p$  = 80 – 82 °C;  $^1\text{H NMR}$  (600 MHz,  $\text{CDCl}_3$ )  $\delta$  9.64 (d,  $J$  = 7.7 Hz, 1H), 7.35 (d,  $J$  = 15.8 Hz, 1H), 7.10 (s, 1H), 7.09 – 7.06 (m, 1H), 6.91 (d,  $J$  = 8.3 Hz, 1H), 6.58 (dd,  $J$  = 15.8, 7.7 Hz, 1H), 4.33 – 4.31 (m, 2H), 4.30 – 4.27 (m, 2H);  $^{13}\text{C NMR}$  (151 MHz,  $\text{CDCl}_3$ )  $\delta$  193.6, 152.6, 146.6, 143.9, 127.7, 127.1, 122.7, 118.0, 117.2, 64.6, 64.2; **HRMS** (ESI)  $m/z$ :  $[\text{M} + \text{H}]^+$  calcd. for  $\text{C}_{11}\text{H}_{11}\text{O}_3$  191.0703; found 191.0701.

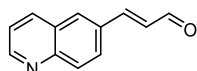

### (*E*)-3-(quinolin-6-yl)acrylaldehyde (S53):

White solid (0.48 g, 52% yield);  $R_f$  = 0.1 (Petroleum ether/Ethyl acetate = 5:1);  $M_p$  = 159 –

160 °C; **<sup>1</sup>H NMR** (600 MHz, CDCl<sub>3</sub>) δ 9.80 – 9.76 (m, 1H), 8.98 – 8.94 (m, 1H), 8.21 (d, *J* = 7.8 Hz, 1H), 8.15 (d, *J* = 7.2 Hz, 1H), 7.99 (s, 1H), 7.93 (d, *J* = 8.4 Hz, 1H), 7.65 (d, *J* = 15.9 Hz, 1H), 7.49 – 7.44 (m, 1H), 6.88 – 6.81 (m, 1H); **<sup>13</sup>C NMR** (151 MHz, CDCl<sub>3</sub>) δ 193.4, 151.9, 151.4, 149.4, 136.6, 132.3, 130.6, 129.9, 129.6, 128.2, 127.4, 122.1; **HRMS** (ESI) *m/z*: [M + H]<sup>+</sup> calcd. for C<sub>12</sub>H<sub>10</sub>NO 184.0757; found 184.0756.

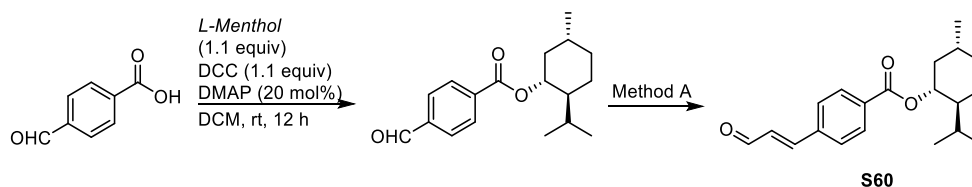

According to the procedure reported in the literature<sup>16</sup>, A 50 mL round bottom flask was fitted with a stirring bar, 4-formylbenzoic acid (5 mmol, 1.0 equiv), DCC (5.5 mmol, 1.1 equiv), and DMAP (20 mol%) was added. Then DCM (20 mL) and *L*-Menthol (5.5 mmol, 1.1 equiv) were added sequentially. The reaction mixture was stirred at room temperature for 12 h. The reaction was filtered through a Celite pad and concentrated in vacuo. The crude residue was purified by flash silica gel chromatography (Petroleum ether/Ethyl acetate 30:1 to 10:1) to afford the desired ester product. The final ester substituted cinnamaldehyde was prepared according to Method A in General procedures for the Synthesis of Enals.

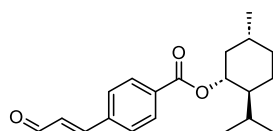

**(1R,2S,5R)-2-isopropyl-5-methylcyclohexyl 4-((E)-3-oxoprop-1-en-1-yl)benzoate (S60):**

Colorless oil (1.12 g, 71% yield); *R*<sub>f</sub> = 0.35 (Petroleum ether/Ethyl acetate = 10:1); **<sup>1</sup>H NMR** (600 MHz, CDCl<sub>3</sub>) δ 9.75 (d, *J* = 7.6 Hz, 1H), 8.10 (d, *J* = 8.3 Hz, 2H), 7.63 (d, *J* = 8.3 Hz, 2H), 7.51 (d, *J* = 16.0 Hz, 1H), 6.78 (dd, *J* = 16.0, 7.6 Hz, 1H), 4.95 (td, *J* = 10.9, 4.4 Hz, 1H), 2.17 – 2.10 (m, 1H), 1.99 – 1.91 (m, 1H), 1.77 – 1.71 (m, 2H), 1.60 – 1.53 (m, 2H), 1.19 – 1.08 (m, 2H), 0.93 (t, *J* = 7.0 Hz, 7H), 0.80 (d, *J* = 6.9 Hz, 3H); **<sup>13</sup>C NMR** (151 MHz, CDCl<sub>3</sub>) δ 193.3, 165.3, 151.0, 137.9, 133.0, 130.3, 130.2, 128.3, 75.4, 47.3, 41.0, 34.3, 31.5, 26.6, 23.7, 22.0, 20.8, 16.6; **HRMS** (ESI) *m/z*: [M + H]<sup>+</sup> calcd. for C<sub>20</sub>H<sub>27</sub>O<sub>3</sub> 315.1955; found 315.1961.

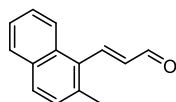

**(E)-3-(2-methylnaphthalen-1-yl)acrylaldehyde (S62):**

White solid (0.64 g, 65% yield); *R*<sub>f</sub> = 0.55 (Petroleum ether/Ethyl acetate = 10:1); *Mp* = 87 – 88 °C; **<sup>1</sup>H NMR** (600 MHz, CDCl<sub>3</sub>) δ 9.88 (d, *J* = 7.8 Hz, 1H), 8.06 – 7.99 (m, 2H), 7.84 (d, *J* = 8.0 Hz, 1H), 7.79 (d, *J* = 8.4 Hz, 1H), 7.52 (t, *J* = 7.4 Hz, 1H), 7.48 (t, *J* = 7.3 Hz, 1H), 7.38 (d, *J* = 8.4 Hz, 1H), 6.57 (dd, *J* = 16.3, 7.8 Hz, 1H), 2.54 (s, 3H); **<sup>13</sup>C NMR** (151 MHz, CDCl<sub>3</sub>) δ 193.8, 150.6, 136.0, 134.6, 132.2, 131.1, 130.0, 129.6, 129.0, 128.6, 127.0, 125.5, 124.2, 21.2; **HRMS** (ESI) *m/z*: [M + H]<sup>+</sup> calcd. for C<sub>14</sub>H<sub>13</sub>O 197.0961; found 197.0962.

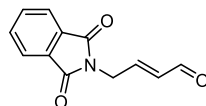

**(E)-4-(1,3-dioxoisindolin-2-yl)but-2-enal (80):**

White solid (0.43 g, 40% yield, E/Z = 7/1);  $R_f$  = 0.2 (Petroleum ether/Ethyl acetate = 4:1); Mp = 117 – 118 °C;  $^1\text{H NMR}$  (600 MHz,  $\text{CDCl}_3$ )  $\delta$  9.57 (d,  $J$  = 7.6 Hz, 1H), 7.91 – 7.87 (m, 2H), 7.78 – 7.75 (m, 2H), 6.82 (dt,  $J$  = 15.8, 5.0 Hz, 1H), 6.15 (dd,  $J$  = 15.8, 7.6 Hz, 1H), 4.59 – 4.53 (m, 2H);  $^{13}\text{C NMR}$  (151 MHz,  $\text{CDCl}_3$ )  $\delta$  192.5, 167.5, 149.0, 134.4, 133.2, 131.9, 123.7, 38.4; **HRMS** (ESI)  $m/z$ :  $[\text{M} + \text{H}]^+$  calcd. for  $\text{C}_{12}\text{H}_{10}\text{NO}_3$  216.0655; found 216.0658.

**General procedures for the Synthesis of ester-substituted enals**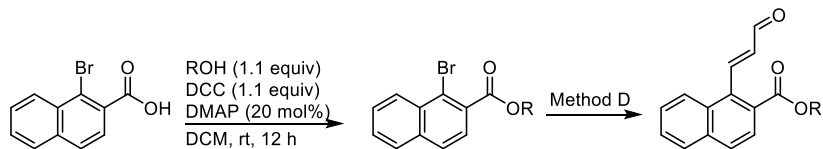

According to the procedure reported in the literature<sup>16</sup>, A 50 mL round bottom flask was fitted with a stirring bar, naphthoic acid (5 mmol, 1.0 equiv), DCC (5.5 mmol, 1.1 equiv), and DMAP (20 mol%) were added. Then DCM (20 mL) and alcohol (5.5 mmol, 1.1 equiv) were added sequentially. The reaction mixture was stirred at room temperature for 12 h. The reaction was filtered through a Celite pad and concentrated in vacuo. The crude residue was purified by flash silica gel chromatography (Petroleum ether/Ethyl acetate 40:1 to 5:1) to afford the desired ester product. The final ester substituted cinnamaldehyde was prepared according to Method D in General Procedures for the Synthesis of Enals.

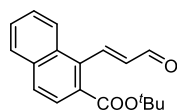**tert-butyl (E)-1-(3-oxoprop-1-en-1-yl)-2-naphthoate (96):**

White solid (0.44 g, 31% yield);  $R_f$  = 0.5 (Petroleum ether/Ethyl acetate = 10:1); Mp = 72 – 74 °C;  $^1\text{H NMR}$  (600 MHz,  $\text{CDCl}_3$ )  $\delta$  9.93 (d,  $J$  = 7.8 Hz, 1H), 8.35 (d,  $J$  = 16.3 Hz, 1H), 8.10 (d,  $J$  = 8.4 Hz, 1H), 7.95 (d,  $J$  = 8.6 Hz, 1H), 7.92 – 7.87 (m, 2H), 7.60 (t,  $J$  = 7.0 Hz, 1H), 7.56 (dd,  $J$  = 11.2, 3.9 Hz, 1H), 6.39 (dd,  $J$  = 16.3, 7.8 Hz, 1H), 1.61 (s, 9H);  $^{13}\text{C NMR}$  (151 MHz,  $\text{CDCl}_3$ )  $\delta$  193.5, 166.4, 152.0, 135.2, 135.0, 134.7, 130.4, 129.2, 128.5, 128.4, 127.9, 127.3, 126.3, 125.8, 82.4, 28.3; **HRMS** (ESI)  $m/z$ :  $[\text{M} + \text{H}]^+$  calcd. for  $\text{C}_{18}\text{H}_{19}\text{O}_3$  283.1329; found 283.1329.

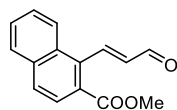**methyl (E)-1-(3-oxoprop-1-en-1-yl)-2-naphthoate (S63):**

White solid (0.46 g, 38% yield);  $R_f$  = 0.5 (Petroleum ether/Ethyl acetate = 10:1); Mp = 92 – 93 °C;  $^1\text{H NMR}$  (600 MHz,  $\text{CDCl}_3$ )  $\delta$  9.94 (d,  $J$  = 7.8 Hz, 1H), 8.38 (d,  $J$  = 16.3 Hz, 1H), 8.13 (d,  $J$  = 8.5 Hz, 1H), 8.02 (d,  $J$  = 8.7 Hz, 1H), 7.91 (d,  $J$  = 8.7 Hz, 2H), 7.63 (t,  $J$  = 7.4 Hz, 1H), 7.57 (t,  $J$  = 7.6 Hz, 1H), 6.38 (dd,  $J$  = 16.3, 7.8 Hz, 1H), 3.95 (s, 3H);  $^{13}\text{C NMR}$  (151 MHz,  $\text{CDCl}_3$ )  $\delta$  193.5, 167.4, 151.7, 136.0, 135.5, 135.3, 130.4, 129.3, 128.5, 128.3, 127.5, 126.5, 126.2, 125.6, 52.5; **HRMS** (ESI)  $m/z$ :  $[\text{M} + \text{H}]^+$  calcd. for  $\text{C}_{15}\text{H}_{13}\text{O}_3$  241.0859; found 241.0860.

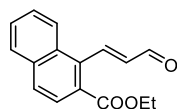**ethyl (E)-1-(3-oxoprop-1-en-1-yl)-2-naphthoate (S107):**

White solid (0.46 g, 36% yield);  $R_f = 0.5$  (Petroleum ether/Ethyl acetate = 10:1);  $M_p = 83 - 84\text{ }^\circ\text{C}$ ;  **$^1\text{H NMR}$**  (600 MHz,  $\text{CDCl}_3$ )  $\delta$  9.93 (d,  $J = 7.8\text{ Hz}$ , 1H), 8.38 (d,  $J = 16.2\text{ Hz}$ , 1H), 8.13 (d,  $J = 8.4\text{ Hz}$ , 1H), 8.03 (d,  $J = 8.5\text{ Hz}$ , 1H), 7.91 (d,  $J = 8.4\text{ Hz}$ , 2H), 7.62 (t,  $J = 7.3\text{ Hz}$ , 1H), 7.57 (t,  $J = 7.5\text{ Hz}$ , 1H), 6.38 (dd,  $J = 16.2, 7.8\text{ Hz}$ , 1H), 4.45 – 4.37 (m, 2H), 1.42 (t,  $J = 7.1\text{ Hz}$ , 3H);  **$^{13}\text{C NMR}$**  (151 MHz,  $\text{CDCl}_3$ )  $\delta$  193.5, 167.0, 151.8, 135.7, 135.4, 135.3, 130.3, 129.2, 128.5, 128.2, 127.4, 126.6, 126.5, 125.7, 61.6, 14.3; **HRMS** (ESI)  $m/z$ :  $[\text{M} + \text{H}]^+$  calcd. for  $\text{C}_{16}\text{H}_{15}\text{O}_3$  255.1016; found 255.1015.

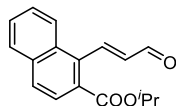

**isopropyl (*E*)-1-(3-oxoprop-1-en-1-yl)-2-naphthoate (S108):**

White solid (0.41 g, 30% yield);  $R_f = 0.5$  (Petroleum ether/Ethyl acetate = 10:1);  $M_p = 63 - 64\text{ }^\circ\text{C}$ ;  **$^1\text{H NMR}$**  (600 MHz,  $\text{CDCl}_3$ )  $\delta$  9.93 (d,  $J = 7.8\text{ Hz}$ , 1H), 8.37 (d,  $J = 16.3\text{ Hz}$ , 1H), 8.12 (d,  $J = 8.4\text{ Hz}$ , 1H), 8.00 (d,  $J = 8.6\text{ Hz}$ , 1H), 7.91 (d,  $J = 8.4\text{ Hz}$ , 2H), 7.64 – 7.58 (m, 1H), 7.58 – 7.53 (m, 1H), 6.39 (dd,  $J = 16.3, 7.8\text{ Hz}$ , 1H), 5.31 – 5.24 (m, 1H), 1.39 (d,  $J = 6.3\text{ Hz}$ , 6H);  **$^{13}\text{C NMR}$**  (151 MHz,  $\text{CDCl}_3$ )  $\delta$  193.5, 166.6, 151.8, 135.4, 135.3, 135.2, 130.3, 129.2, 128.4, 128.1, 127.4, 127.1, 126.4, 125.7, 69.3, 22.0; **HRMS** (ESI)  $m/z$ :  $[\text{M} + \text{H}]^+$  calcd. for  $\text{C}_{17}\text{H}_{17}\text{O}_3$  269.1172; found 269.1173.

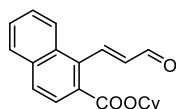

**cyclohexyl (*E*)-1-(3-oxoprop-1-en-1-yl)-2-naphthoate (S109):**

White solid (0.54 g, 35% yield);  $R_f = 0.5$  (Petroleum ether/Ethyl acetate = 10:1);  $M_p = 68 - 70\text{ }^\circ\text{C}$ ;  **$^1\text{H NMR}$**  (600 MHz,  $\text{CDCl}_3$ )  $\delta$  9.93 (d,  $J = 7.8\text{ Hz}$ , 1H), 8.38 (d,  $J = 16.3\text{ Hz}$ , 1H), 8.13 (d,  $J = 8.4\text{ Hz}$ , 1H), 8.02 (d,  $J = 8.6\text{ Hz}$ , 1H), 7.91 (d,  $J = 8.3\text{ Hz}$ , 2H), 7.62 (t,  $J = 7.3\text{ Hz}$ , 1H), 7.59 – 7.53 (m, 1H), 6.39 (dd,  $J = 16.2, 7.8\text{ Hz}$ , 1H), 5.09 – 5.01 (m, 1H), 2.05 – 1.95 (m, 2H), 1.85 – 1.75 (m, 2H), 1.63 – 1.57 (m, 3H), 1.51 – 1.38 (m, 2H), 1.39 – 1.30 (m, 1H);  **$^{13}\text{C NMR}$**  (151 MHz,  $\text{CDCl}_3$ )  $\delta$  193.5, 166.5, 151.9, 135.4, 135.3, 135.2, 130.4, 129.2, 128.4, 128.1, 127.4, 127.2, 126.4, 125.7, 74.2, 31.7, 25.4, 23.8; **HRMS** (ESI)  $m/z$ :  $[\text{M} + \text{H}]^+$  calcd. for  $\text{C}_{20}\text{H}_{21}\text{O}_3$  309.1485; found 309.1484.

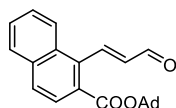

**(3*r*)-adamantan-1-yl 1-((*E*)-3-oxoprop-1-en-1-yl)-2-naphthoate (S110):**

White solid (0.40 g, 22% yield);  $R_f = 0.5$  (Petroleum ether/Ethyl acetate = 10:1);  $M_p = 119 - 120\text{ }^\circ\text{C}$ ;  **$^1\text{H NMR}$**  (600 MHz,  $\text{CDCl}_3$ )  $\delta$  9.93 (d,  $J = 7.8\text{ Hz}$ , 1H), 8.34 (d,  $J = 16.3\text{ Hz}$ , 1H), 8.10 (d,  $J = 8.4\text{ Hz}$ , 1H), 7.95 (d,  $J = 8.6\text{ Hz}$ , 1H), 7.92 – 7.87 (m, 2H), 7.60 (t,  $J = 7.4\text{ Hz}$ , 1H), 7.55 (t,  $J = 7.6\text{ Hz}$ , 1H), 6.39 (dd,  $J = 16.3, 7.8\text{ Hz}$ , 1H), 2.30 – 2.25 (m, 6H), 2.25 – 2.21 (m, 3H), 1.76 – 1.68 (m, 6H);  **$^{13}\text{C NMR}$**  (151 MHz,  $\text{CDCl}_3$ )  $\delta$  193.6, 166.1, 152.1, 135.1, 135.0, 134.6, 130.4, 129.1, 128.6, 128.4, 127.9, 127.3, 126.3, 125.9, 82.7, 41.6, 36.2, 31.0; **HRMS** (ESI)  $m/z$ :  $[\text{M} + \text{H}]^+$  calcd. for  $\text{C}_{24}\text{H}_{25}\text{O}_3$  361.1798; found 361.1796.

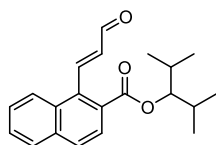

**2,4-dimethylpentan-3-yl (*E*)-1-(3-oxoprop-1-en-1-yl)-2-naphthoate (S111):**

White solid (0.44 g, 27% yield);  $R_f = 0.5$  (Petroleum ether/Ethyl acetate = 10:1);  $M_p = 70 - 72\text{ }^\circ\text{C}$ ;  $^1\text{H NMR}$  (600 MHz,  $\text{CDCl}_3$ )  $\delta$  9.93 (d,  $J = 7.9$  Hz, 1H), 8.39 (d,  $J = 16.3$  Hz, 1H), 8.14 (d,  $J = 8.5$  Hz, 1H), 8.07 (d,  $J = 8.7$  Hz, 1H), 7.95 – 7.90 (m, 2H), 7.62 (t,  $J = 7.1$  Hz, 1H), 7.57 (t,  $J = 7.2$  Hz, 1H), 6.39 (dd,  $J = 16.3, 7.9$  Hz, 1H), 4.90 (t,  $J = 6.1$  Hz, 1H), 2.10 – 2.01 (m, 2H), 0.97 (dd,  $J = 6.7, 1.5$  Hz, 12H);  $^{13}\text{C NMR}$  (151 MHz,  $\text{CDCl}_3$ )  $\delta$  193.6, 166.9, 152.1, 135.9, 135.3, 135.3, 130.4, 129.2, 128.4, 128.2, 127.4, 126.6, 125.6, 84.4, 29.6, 19.7, 17.5; **HRMS** (ESI)  $m/z$ :  $[\text{M} + \text{Na}]^+$  calcd. for  $\text{C}_{21}\text{H}_{24}\text{NaO}_3$  347.1618; found 347.1619.

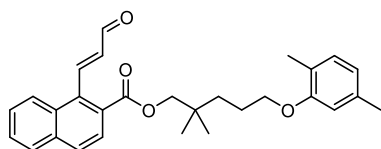**5-(2,5-dimethylphenoxy)-2,2-dimethylpentyl (*E*)-1-(3-oxoprop-1-en-1-yl)-2-naphthoate (S115)**

Yellow oil (0.77 g, 35% yield);  $R_f = 0.45$  (Petroleum ether/Ethyl acetate = 10:1);  $^1\text{H NMR}$  (600 MHz,  $\text{CDCl}_3$ )  $\delta$  9.92 (d,  $J = 7.6$  Hz, 1H), 8.38 (d,  $J = 16.2$  Hz, 1H), 8.13 (d,  $J = 8.2$  Hz, 1H), 8.03 (d,  $J = 8.3$  Hz, 1H), 7.95 – 7.85 (m, 2H), 7.66 – 7.59 (m, 1H), 7.59 – 7.52 (m, 1H), 6.97 (d,  $J = 6.9$  Hz, 1H), 6.63 (d,  $J = 7.0$  Hz, 1H), 6.61 (s, 1H), 6.38 (dd,  $J = 16.1, 7.7$  Hz, 1H), 4.12 (s, 2H), 3.98 – 3.90 (m, 2H), 2.29 (s, 3H), 2.13 (s, 3H), 1.88 – 1.76 (m, 2H), 1.61 – 1.53 (m, 2H), 1.07 (s, 6H);  $^{13}\text{C NMR}$  (151 MHz,  $\text{CDCl}_3$ )  $\delta$  193.5, 167.0, 157.0, 151.7, 136.5, 136.0, 135.5, 135.3, 130.4, 130.3, 129.3, 128.5, 128.3, 127.5, 126.5, 126.5, 125.5, 123.5, 120.8, 112.0, 73.5, 68.2, 35.7, 33.9, 24.5, 24.2, 21.4, 15.8; **HRMS** (ESI)  $m/z$ :  $[\text{M} + \text{H}]^+$  calcd. for  $\text{C}_{29}\text{H}_{33}\text{O}_4$  445.2373; found 445.2372.

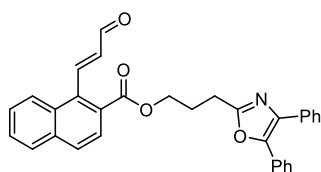**3-(4,5-diphenyloxazol-2-yl)propyl (*E*)-1-(3-oxoprop-1-en-1-yl)-2-naphthoate (S116):**

Yellow oil (0.56 g, 23% yield);  $R_f = 0.2$  (Petroleum ether/Ethyl acetate = 5:1);  $^1\text{H NMR}$  (600 MHz,  $\text{CDCl}_3$ )  $\delta$  9.91 (d,  $J = 7.7$  Hz, 1H), 8.32 (d,  $J = 16.3$  Hz, 1H), 8.07 (d,  $J = 8.3$  Hz, 1H), 7.98 (d,  $J = 8.6$  Hz, 1H), 7.84 (d,  $J = 7.8$  Hz, 1H), 7.79 (d,  $J = 8.5$  Hz, 1H), 7.62 – 7.55 (m, 3H), 7.54 – 7.46 (m, 3H), 7.35 – 7.26 (m, 6H), 6.32 (dd,  $J = 16.2, 7.8$  Hz, 1H), 4.51 (t,  $J = 5.7$  Hz, 2H), 3.05 (t,  $J = 7.0$  Hz, 2H), 2.44 – 2.32 (m, 2H);  $^{13}\text{C NMR}$  (151 MHz,  $\text{CDCl}_3$ )  $\delta$  193.5, 166.7, 162.4, 151.7, 145.4, 136.2, 135.4, 135.2, 132.4, 130.3, 129.2, 128.9, 128.6, 128.5, 128.4, 128.3, 128.1, 127.9, 127.4, 126.5, 126.4, 126.0, 125.6, 64.7, 26.2, 25.3; **HRMS** (ESI)  $m/z$ :  $[\text{M} + \text{H}]^+$  calcd. for  $\text{C}_{32}\text{H}_{26}\text{NO}_4$  488.1856; found 488.1857.

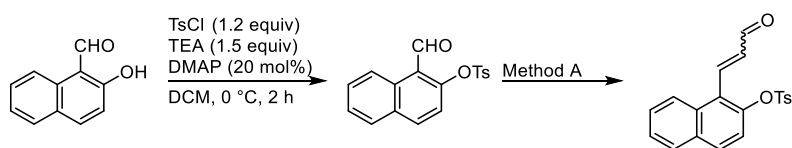

Prepared according to literature<sup>17</sup>. To round bottom flask equipped with a stirring bar, 2-hydroxy-1-naphthaldehyde (5 mmol, 1 equiv), TEA (7.5 mmol, 1.5 equiv), DMAP (20 mol%), and DCM were added. The reaction was cooled to 0 °C and TsCl (6 mmol, 1.2 equiv) in DCM was added

dropwise and left to stir for 2 hours. The reaction was quenched with DCM (3 × 25 mL) and the combined organic layers were washed with brine (3 × 25 mL) and dried over magnesium sulfate. The solvent was evaporated to give the crude product. The crude product was purified by flash column chromatography to afford 1-formylnaphthalen-2-yl 4-methylbenzenesulfonate. Then, the desired cinnamaldehyde was prepared according to Method A in General Procedures for the Synthesis of Enals.

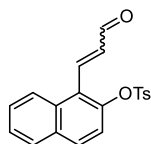

**1-(3-oxoprop-1-en-1-yl)naphthalen-2-yl 4-methylbenzenesulfonate (S112):**

White solid (0.52 g, 29% yield);  $R_f$  = 0.2 (Petroleum ether/Ethyl acetate = 10:1);  $M_p$  = 92 – 94 °C;  $^1\text{H NMR}$  (600 MHz,  $\text{CDCl}_3$ )  $\delta$  9.50 – 9.36 (m, 1H), 8.04 – 7.82 (m, 3H), 7.72 – 7.41 (m, 6H), 7.32 – 7.17 (m, 2H), 6.45 – 6.28 (m, 1H), 2.46 – 2.33 (m, 3H);  $^{13}\text{C NMR}$  (151 MHz,  $\text{CDCl}_3$ )  $\delta$  193.1, 146.3, 145.5, 144.3, 135.9, 132.4, 131.8, 131.0, 130.1, 128.9, 128.6, 128.0, 126.8, 124.6, 124.5, 122.0, 21.7; **HRMS** (ESI)  $m/z$ :  $[M + H]^+$  calcd. for  $\text{C}_{20}\text{H}_{17}\text{O}_4\text{S}$  353.0842; found 353.0841.

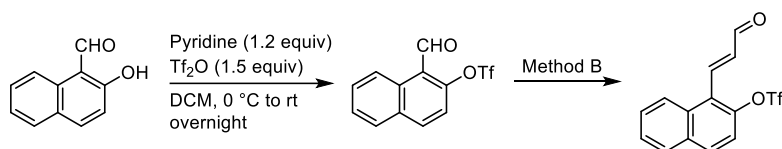

Prepared according to literature<sup>17</sup>. To round bottom flask equipped with a stirring bar, 2-hydroxy-1-naphthaldehyde (5 mmol, 1 equiv), pyridine (6 mmol, 1.2 equiv), and dry DCM were added. The flask was cooled to 0 °C and  $\text{Tf}_2\text{O}$  (7.5 mmol, 1.5 equiv) was added dropwise. The reaction was warmed to room temperature and left to stir overnight. The reaction was saturated with  $\text{NaHCO}_3$  (25 mL). The aqueous phase was washed with DCM (3 × 25 mL) and dried over magnesium sulfate. The solvent was evaporated to give the crude product. The crude product was purified by flash column chromatography to afford 1-formylnaphthalen-2-yl trifluoromethanesulfonate. Then, the desired cinnamaldehyde was prepared according to Method B in General Procedures for the Synthesis of Enals.

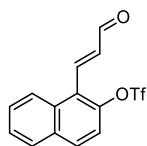

**(E)-1-(3-oxoprop-1-en-1-yl)naphthalen-2-yl trifluoromethanesulfonate (S113):**

White solid (0.81 g, 49% yield);  $R_f$  = 0.35 (Petroleum ether/Ethyl acetate = 10:1);  $M_p$  = 42 – 44 °C;  $^1\text{H NMR}$  (600 MHz,  $\text{CDCl}_3$ )  $\delta$  9.89 (d,  $J$  = 7.5 Hz, 1H), 8.10 (d,  $J$  = 8.4 Hz, 1H), 7.99 (d,  $J$  = 9.1 Hz, 1H), 7.97 – 7.92 (m, 2H), 7.70 – 7.62 (m, 2H), 7.48 (d,  $J$  = 9.0 Hz, 1H), 6.79 (dd,  $J$  = 16.4, 7.5 Hz, 1H);  $^{13}\text{C NMR}$  (151 MHz,  $\text{CDCl}_3$ )  $\delta$  192.7, 144.4, 143.0, 138.0, 132.6, 132.2, 131.2, 128.9, 128.6, 127.5, 124.9, 124.8, 119.6, 118.6 (q,  $^1J_{\text{C-F}}$  = 320.6 Hz);  $^{19}\text{F NMR}$  (565 MHz,  $\text{CDCl}_3$ )  $\delta$  -73.5; **HRMS** (ESI)  $m/z$ :  $[M + \text{Na}]^+$  calcd. for  $\text{C}_{14}\text{H}_9\text{F}_3\text{NaO}_4\text{S}$  353.0066; found 353.0064.



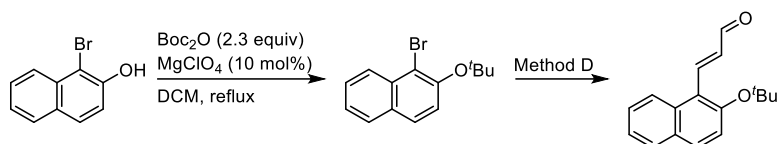

According to the procedure reported in the literature<sup>18</sup>, in a 100 mL three-necked flask equipped with a magnetic stirring bar and a condenser coil,  $\text{Mg}(\text{ClO}_4)_2$  (0.5 mmol, 10 mol%) and the alcohol (5.0 mmol) were dissolved in 10 mL of DCM. Then  $\text{Boc}_2\text{O}$  (11.5 mmol, 2.3 equiv) was added and bubbling was immediately observed. The mixture was stirred at reflux until the TLC analysis revealed the presence of  $\text{Boc}_2\text{O}$ . The crude reaction mixture was diluted with water and extracted with DCM. The organic layer was separated, dried over  $\text{Na}_2\text{SO}_4$ , filtered, and removed by rotary evaporation. The tert-butyl ether was purified by flash chromatography on silica gel with a mixture of petroleum ether/Ethyl acetate =40:1. The final tert-butoxy substituted cinnamaldehyde was prepared according to Method D in General Procedures for the Synthesis of Enals.

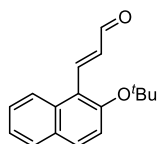

#### (*E*)-3-(2-(tert-butoxy)naphthalen-1-yl)acrylaldehyde (S114):

White solid (0.38 g, 30% yield);  $R_f = 0.5$  (Petroleum ether/Ethyl acetate = 10:1);  $\text{Mp} = 116 - 117^\circ\text{C}$ ;  $^1\text{H NMR}$  (600 MHz,  $\text{CDCl}_3$ )  $\delta$  9.83 (d,  $J = 7.8$  Hz, 1H), 8.19 – 8.10 (m, 2H), 7.82 (t,  $J = 7.4$  Hz, 2H), 7.54 (t,  $J = 7.6$  Hz, 1H), 7.44 (t,  $J = 7.3$  Hz, 1H), 7.35 (d,  $J = 8.9$  Hz, 1H), 7.00 (dd,  $J = 16.2, 7.8$  Hz, 1H), 1.47 (s, 9H);  $^{13}\text{C NMR}$  (151 MHz,  $\text{CDCl}_3$ )  $\delta$  194.8, 154.0, 148.5, 134.5, 132.1, 131.4, 130.2, 128.7, 127.5, 124.8, 123.7, 123.0, 122.3, 81.7, 29.6; **HRMS** (ESI)  $m/z$ :  $[\text{M} + \text{Na}]^+$  calcd. for  $\text{C}_{17}\text{H}_{18}\text{NaO}_2$  277.1199; found 277.1201.

#### Chiral Secondary Amines

**A1** was purchased from commercial sources and used as received. **A2**,<sup>19a</sup> **A3**,<sup>19b</sup> **A4**,<sup>19c</sup> **A5**,<sup>19d</sup> **A6**,<sup>19e</sup> **A7**,<sup>19f</sup> **A8**,<sup>19g</sup> **A9**,<sup>19a</sup> and **A10**<sup>19b</sup> were prepared according to the procedures reported in the literature.

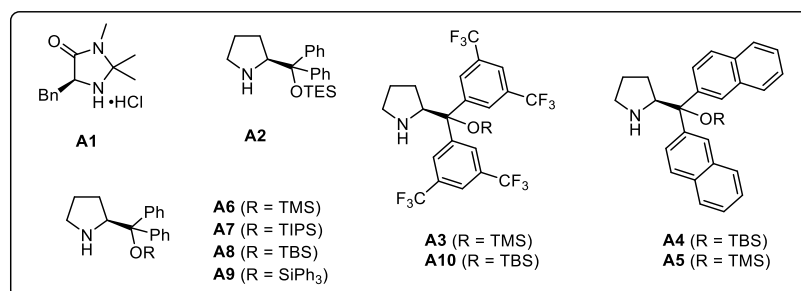

**Scheme S3.** Chiral secondary amines used in the reactions.

## Optimization of the Reaction Conditions

### General Procedures:

For the conditions toward achiral pyridine, an oven-dried Schlenk tube (10 mL) containing a stirring bar was charged with oxime (0.3 mmol, 3 equiv) and **2** (0.1 mmol, 1 equiv). The Schlenk tube was then introduced into a glove box, where it was charged with [Fe] (10 mol%) and amine (20 mol%). The tube was fitted with a rubber septum and removed from the glove box. Then solvent (1 mL) was added to the Schlenk tube through the rubber septum using syringes, and then the septum was replaced by a Teflon screwcap under nitrogen flow. The reaction mixture was stirred at the set temperature for 12 h. Then, the mixture was cooled to room temperature and diluted with ethyl acetate (3 mL). Then, n-tridecane (0.1 mmol) was added to the tube as an internal standard, and the yield of the desired product was determined by GC analysis. As for the isolated yield of the desired product, the reaction mixture was diluted with ethyl acetate (5 mL) and filtered through a pad of silica gel with additional ethyl acetate (20 mL) as the eluent. The filtrate was concentrated under reduced pressure. The residue was purified by flash chromatography on silica gel to afford the desired product.

For the conditions toward axially chiral heterobiaryls, an oven-dried Schlenk tube (10 mL) containing a stirring bar was charged with the oxime (0.3 mmol, 3 equiv) and enal **96** (0.1 mmol, 1 equiv). The Schlenk tube was then introduced into a glove box, where it was charged with Fe(acac)<sub>2</sub> (10 mol%) and chiral amine (20 mol%). The tube was fitted with a rubber septum and removed from the glove box. Then solvent (1 mL) was added to the Schlenk tube through the rubber septum using syringes, and then the septum was replaced by a Teflon screwcap under nitrogen flow. The reaction mixture was stirred at the set temperature for a set length of time. Upon cooling to room temperature, the reaction mixture was diluted with 5 mL of ethyl acetate and filtered through a pad of silica gel with additional ethyl acetate (20 mL) as the eluent. The filtrate was concentrated under reduced pressure. The residue was purified by flash chromatography on silica gel to afford the desired product.

**Table S1.** Optimization of the Reaction Conditions Toward Pyridines<sup>a</sup>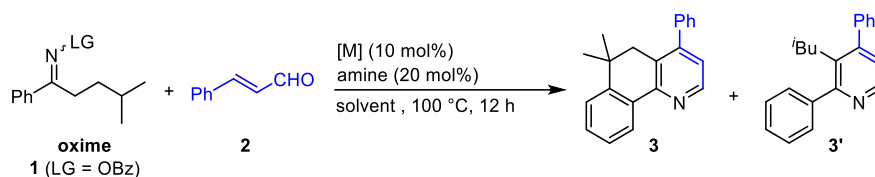

| Entry                 | [M]                         | LG         | Solvent            | Amine                                             | <b>3</b> (%) <sup>b</sup>               | <b>3'</b> (%) <sup>b</sup> |
|-----------------------|-----------------------------|------------|--------------------|---------------------------------------------------|-----------------------------------------|----------------------------|
| 1                     | FeS                         | OBz        | 1,4-dioxane        | pyrrolidine·HClO <sub>4</sub>                     | 42                                      | 13                         |
| 2                     | Fe(OTf) <sub>2</sub>        | OBz        | 1,4-dioxane        | pyrrolidine·HClO <sub>4</sub>                     | 48                                      | 21                         |
| 3                     | FeCl <sub>3</sub>           | OBz        | 1,4-dioxane        | pyrrolidine·HClO <sub>4</sub>                     | 31                                      | 20                         |
| 4                     | CuI                         | OBz        | 1,4-dioxane        | pyrrolidine·HClO <sub>4</sub>                     | 0                                       | 56                         |
| 5                     | Fe(acac) <sub>2</sub>       | OBz        | 1,4-dioxane        | pyrrolidine·HClO <sub>4</sub>                     | 59 (55 <sup>h</sup> , 47 <sup>i</sup> ) | 13                         |
| 6                     | Fe(acac) <sub>2</sub>       | OAc        | 1,4-dioxane        | pyrrolidine·HClO <sub>4</sub>                     | 40                                      | 27                         |
| 7                     | Fe(acac) <sub>2</sub>       | OPiv       | 1,4-dioxane        | pyrrolidine·HClO <sub>4</sub>                     | 58                                      | 16                         |
| 8                     | Fe(acac) <sub>2</sub>       | OFBz       | 1,4-dioxane        | pyrrolidine·HClO <sub>4</sub>                     | 57                                      | 5                          |
| 9                     | Fe(acac) <sub>2</sub>       | OBz        | toluene            | pyrrolidine·HClO <sub>4</sub>                     | 47                                      | 4                          |
| 10                    | Fe(acac) <sub>2</sub>       | OBz        | THF                | pyrrolidine·HClO <sub>4</sub>                     | 50                                      | 17                         |
| 11                    | Fe(acac) <sub>2</sub>       | OBz        | MeCN               | pyrrolidine·HClO <sub>4</sub>                     | 56                                      | 11                         |
| 12                    | Fe(acac) <sub>2</sub>       | OBz        | DMSO               | pyrrolidine·HClO <sub>4</sub>                     | 46                                      | 22                         |
| 13                    | Fe(acac) <sub>2</sub>       | OBz        | 1,4-dioxane        | piperidine·HClO <sub>4</sub>                      | 51                                      | 15                         |
| 14                    | Fe(acac) <sub>2</sub>       | OBz        | 1,4-dioxane        | morpholine·HClO <sub>4</sub>                      | 55                                      | 12                         |
| 15                    | Fe(acac) <sub>2</sub>       | OBz        | 1,4-dioxane        | <sup>i</sup> Pr <sub>2</sub> NH·HClO <sub>4</sub> | 34                                      | 7                          |
| 16                    | Fe(acac) <sub>2</sub>       | OBz        | 1,4-dioxane        | <b>A1</b>                                         | 0                                       | 0                          |
| 17                    | Fe(acac) <sub>2</sub>       | OBz        | 1,4-dioxane        | <b>A2</b>                                         | 18                                      | 18                         |
| 18                    | Fe(acac) <sub>2</sub>       | OBz        | 1,4-dioxane        | <b>A3</b>                                         | 17                                      | 7                          |
| 19                    | Fe(acac) <sub>2</sub>       | OBz        | 1,4-dioxane        | pyrrolidine·HOTf                                  | 55                                      | 15                         |
| 20 <sup>c</sup>       | Fe(acac) <sub>2</sub>       | OBz        | 1,4-dioxane        | pyrrolidine·HClO <sub>4</sub>                     | 51                                      | 10                         |
| 21 <sup>c</sup>       | Fe(acac) <sub>2</sub>       | OBz        | 1,4-dioxane        | none                                              | 0                                       | 0                          |
| 22 <sup>c</sup>       | none                        | OBz        | 1,4-dioxane        | pyrrolidine·HClO <sub>4</sub>                     | 0                                       | 0                          |
| <b>23<sup>d</sup></b> | <b>Fe(acac)<sub>2</sub></b> | <b>OBz</b> | <b>1,4-dioxane</b> | <b>pyrrolidine·HClO<sub>4</sub></b>               | <b>72 (70<sup>e</sup>)</b>              | <b>12(7<sup>e</sup>)</b>   |
| 24 <sup>d,f</sup>     | Fe(acac) <sub>2</sub>       | OBz        | 1,4-dioxane        | pyrrolidine·HClO <sub>4</sub>                     | N.D.                                    | N.D.                       |
| 25 <sup>d,g</sup>     | Fe(acac) <sub>2</sub>       | OBz        | 1,4-dioxane        | pyrrolidine·HClO <sub>4</sub>                     | 26                                      | 19                         |

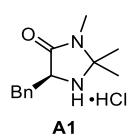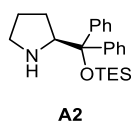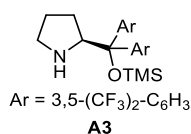

<sup>a</sup> Reaction conditions: oxime (0.3 mmol), **2** (0.1 mmol), [Fe] (10 mol%), amine (20 mol%), 1,4-dioxane (1 mL), 100 °C, 12 h, under N<sub>2</sub>. <sup>b</sup> Yield determined by GC using n-tridecane as an internal standard. <sup>c</sup> Reaction was run at 60 °C. <sup>d</sup> Reaction was run at 120 °C. <sup>e</sup> Isolated yield. <sup>f</sup> **1** (0.15 mmol, 1.5 equiv), DDQ (0.2 mmol, 2 equiv) as an extrinsic oxidant. <sup>g</sup> **1** (0.15 mmol, 1.5 equiv), PhNO<sub>2</sub> (0.2 mmol, 2 equiv) as an extrinsic oxidant. <sup>h</sup> The amount of oxime was 0.2 mmol. <sup>i</sup> The amount of oxime was 0.15 mmol. Abbreviation: LG = Leaving group. Bz = Benzoyl. Ac = Acetyl. Piv = pivaloyl. <sup>F</sup>Bz = Pentafluorobenzoyl. TES = Triethylsilyl. TMS = Trimethylsilyl. DDQ = 2,3-Dichloro-5,6-dicyano-1,4-benzoquinone. N.D. = Not detected.

**Table S2.** Optimization of the Reaction Conditions Toward Axially Chiral Heterobiaryls<sup>a</sup>

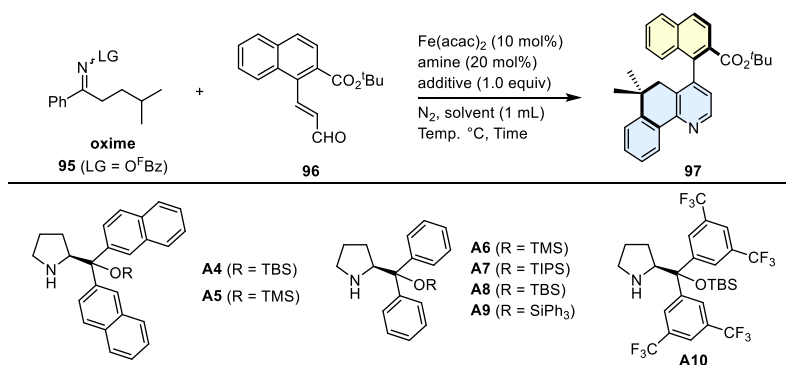

| Entry | LG                | Additive                        | Temp. (°C) | Amine | Solvent                             | Time(h) | 3 (%) <sup>b</sup>  | er (%) <sup>c</sup> |
|-------|-------------------|---------------------------------|------------|-------|-------------------------------------|---------|---------------------|---------------------|
| 1     | OBz               | PhCOOH                          | 60         | A4    | 1,4-dioxane                         | 12      | N.D.                | -                   |
| 2     | OAc               | PhCOOH                          | 60         | A4    | 1,4-dioxane                         | 12      | N.D.                | -                   |
| 3     | OPiv              | PhCOOH                          | 60         | A4    | 1,4-dioxane                         | 12      | N.D.                | -                   |
| 4     | O <sup>F</sup> Bz | PhCOOH                          | 60         | A4    | 1,4-dioxane                         | 12      | 47                  | 90:10               |
| 5     | O <sup>F</sup> Bz | <i>m</i> -MeBzOH                | 60         | A4    | 1,4-dioxane                         | 12      | 34                  | 89.5:10.5           |
| 6     | O <sup>F</sup> Bz | <i>p</i> -OMeBzOH               | 60         | A4    | 1,4-dioxane                         | 12      | 31                  | 88:12               |
| 7     | O <sup>F</sup> Bz | <i>p</i> -NO <sub>2</sub> BzOH  | 60         | A4    | 1,4-dioxane                         | 12      | 35                  | 88.5:11.5           |
| 8     | O <sup>F</sup> Bz | KH <sub>2</sub> PO <sub>4</sub> | 60         | A4    | 1,4-dioxane                         | 12      | 33                  | 92:8                |
| 9     | O <sup>F</sup> Bz | PhCOOH                          | 50         | A4    | 1,4-dioxane                         | 12      | 43                  | 90:10               |
| 10    | O <sup>F</sup> Bz | PhCOOH                          | 70         | A4    | 1,4-dioxane                         | 12      | 44                  | 87.5:12.5           |
| 11    | O <sup>F</sup> Bz | none                            | 60         | A4    | 1,4-dioxane (0.5 mL)                | 12      | 36                  | 92:8                |
| 12    | O <sup>F</sup> Bz | none                            | 60         | A4    | 1,4-dioxane (2.0 mL)                | 12      | 34                  | 92:8                |
| 13    | O <sup>F</sup> Bz | none                            | 60         | A4    | 1,4-dioxane                         | 12      | 35                  | 93:7                |
| 14    | O <sup>F</sup> Bz | none                            | 60         | A5    | 1,4-dioxane                         | 12      | 13                  | 85:15               |
| 15    | O <sup>F</sup> Bz | none                            | 60         | A6    | 1,4-dioxane                         | 12      | trace               | -                   |
| 16    | O <sup>F</sup> Bz | none                            | 60         | A7    | 1,4-dioxane                         | 12      | 19                  | 91.5:8.5            |
| 17    | O <sup>F</sup> Bz | none                            | 60         | A8    | 1,4-dioxane                         | 12      | 40                  | 91.5:8.5            |
| 18    | O <sup>F</sup> Bz | none                            | 60         | A9    | 1,4-dioxane                         | 12      | 20                  | 90.5:9.5            |
| 19    | O <sup>F</sup> Bz | none                            | 60         | A10   | 1,4-dioxane                         | 12      | 17                  | 90:10               |
| 20    | O <sup>F</sup> Bz | none                            | 40         | A4    | 1,4-dioxane                         | 72      | 40                  | 93.5:7.5            |
| 21    | O <sup>F</sup> Bz | none                            | 50         | A4    | 1,4-dioxane                         | 48      | 39                  | 93:7                |
| 22    | O <sup>F</sup> Bz | none                            | 50         | A4    | THF                                 | 48      | N.D.                | -                   |
| 23    | O <sup>F</sup> Bz | none                            | 50         | A4    | MeCN                                | 48      | N.D.                | -                   |
| 24    | O <sup>F</sup> Bz | none                            | 50         | A4    | DMSO                                | 48      | N.D.                | -                   |
| 25    | O <sup>F</sup> Bz | none                            | 50         | A4    | Toluene                             | 48      | 50                  | 90:10               |
| 26    | O <sup>F</sup> Bz | none                            | 50         | A4    | PhCF <sub>3</sub>                   | 48      | 35                  | 85:15               |
| 27    | O <sup>F</sup> Bz | none                            | 50         | A4    | <i>p</i> -xylene                    | 48      | 42                  | 85:15               |
| 28    | O <sup>F</sup> Bz | none                            | 50         | A4    | Toluene / 1,4-dioxane (0.5mL/0.5mL) | 48      | 53(0 <sup>d</sup> ) | 93:7                |

<sup>a</sup> Reaction conditions: **oxime** (0.3 mmol), **96** (0.1 mmol), Fe(acac)<sub>2</sub> (10 mol%), amine (20 mol%), solvent (1 mL), additive (0 or 1 equiv), at a set temperature for the set reaction time, under N<sub>2</sub>. <sup>b</sup> Isolated yield. <sup>c</sup> Determined by chiral HPLC analysis. <sup>d</sup> In absence of Fe(acac)<sub>2</sub> or amine.

Abbreviation: LG = Leaving group. Bz = Benzoyl. Ac = Acetyl. Piv = pivaloyl. <sup>F</sup>Bz = Pentafluorobenzoyl. TBS = Tert-butyldimethylsilyl. TIPS = Triisopropylsilyl. TMS = Trimethylsilyl. N.D. = Not detected. er = enantiomeric ratio.

## Construction of Fused Pyridines and Axially Chiral Heterobiaryls

### General Procedures Toward Fused Pyridines:

An oven-dried Schlenk tube (10 mL) containing a stirring bar was charged with the oxime (0.6 mmol, 3 equiv) and enal (0.2 mmol, 1 equiv). The Schlenk tube was then introduced into a glove box, where it was charged with  $\text{Fe}(\text{acac})_2$  (10 mol%, 5.0 mg) and pyrrolidine· $\text{HClO}_4$  (20 mol%, 6.8 mg). The tube was fitted with a rubber septum and removed from the glove box. Then 1,4-dioxane (2 mL) was added to the Schlenk tube through the rubber septum using syringes, and then the septum was replaced by a Teflon screwcap under nitrogen flow. The reaction mixture was stirred at 120 °C for 12 h. Upon cooling to room temperature, the reaction mixture was diluted with ethyl acetate (5 mL) and filtered through a pad of silica gel with additional ethyl acetate (20 mL) as the eluent. The filtrate was concentrated under reduced pressure. The residue was purified by flash chromatography on silica gel to afford the desired product.

### General Procedures Toward Axially Chiral Heterobiaryls:

An oven-dried Schlenk tube (10 mL) containing a stirring bar was charged with the oxime (0.6 mmol, 3 equiv) and enal (0.2 mmol, 1 equiv). The Schlenk tube was then introduced into a glove box, where it was charged with  $\text{Fe}(\text{acac})_2$  (10 mol%, 5.0 mg) and chiral amine **A4** (20 mol%, 18.7 mg). The tube was fitted with a rubber septum and taken out from the glove box. Then solvent (1,4-dioxane (1 mL) and toluene (1 mL)) was added to the Schlenk tube through the rubber septum using syringes, and then the septum was replaced by a Teflon screwcap under nitrogen flow. The reaction mixture was stirred at 50 °C for 48 h. Upon cooling to room temperature, the reaction mixture was diluted with 5 mL of ethyl acetate and filtered through a pad of silica gel with additional ethyl acetate (20 mL) as the eluent. The filtrate was concentrated under reduced pressure. The residue was purified by flash chromatography on silica gel to afford the desired axially chiral heterobiaryls. The racemic heterobiaryls were prepared according to the general procedures toward pyridines.

### Note:

All the axially chiral aza-biaryl compounds obtained in this work are stable when they are stored under air, and their enantiopurity remains unchanged.

## Characterization Data for Products

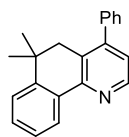

### 6,6-dimethyl-4-phenyl-5,6-dihydrobenzo[h]quinoline (3):

According to the general procedure, a mixture consisting of oxime (0.6 mmol, 177.2 mg), enal (0.2 mmol, 26.4 mg), Fe(acac)<sub>2</sub> (0.02 mmol, 5.0 mg), pyrrolidine·HClO<sub>4</sub> (0.04 mmol, 6.8 mg) and 1,4-dioxane (2 mL) under a N<sub>2</sub> atmosphere was stirred at 120 °C for 12 h to afford **3**. White solid (40.1 mg, 70% yield); R<sub>f</sub> = 0.6 (Petroleum ether/Ethyl acetate = 10:1); Mp = 93-94 °C; **<sup>1</sup>H NMR** (600 MHz, CDCl<sub>3</sub>): δ 8.57 (d, *J* = 4.8 Hz, 1H), 8.44 – 8.40 (m, 1H), 7.47 (t, *J* = 7.4 Hz, 2H), 7.43 (t, *J* = 7.3 Hz, 1H), 7.39 – 7.36 (m, 3H), 7.34 (d, *J* = 7.1 Hz, 2H), 7.11 (d, *J* = 4.8 Hz, 1H), 2.80 (s, 2H), 1.22 (s, 6H); **<sup>13</sup>C NMR** (151 MHz, CDCl<sub>3</sub>): δ 152.8, 149.1, 147.1, 146.3, 139.0, 133.6, 129.6, 128.8, 128.5, 128.1, 127.9, 126.7, 125.9, 123.7, 123.3, 40.1, 33.8, 28.1; **HRMS** (ESI) *m/z*: [M + H]<sup>+</sup> calcd. for C<sub>21</sub>H<sub>20</sub>N 286.1590; found 286.1587.

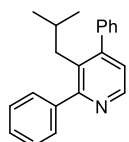

### 3-isobutyl-2,4-diphenylpyridine (Side product 3'):

White solid (4.0 mg, 7% yield); R<sub>f</sub> = 0.3 (Petroleum ether/Ethyl acetate = 10:1); Mp = 113-114 °C; **<sup>1</sup>H NMR** (600 MHz, CDCl<sub>3</sub>) δ 8.52 (d, *J* = 4.8 Hz, 1H), 7.51 (d, *J* = 7.3 Hz, 2H), 7.47 – 7.42 (m, 4H), 7.41 – 7.37 (m, 2H), 7.36 (d, *J* = 7.1 Hz, 2H), 7.10 (d, *J* = 4.8 Hz, 1H), 2.69 (d, *J* = 7.2 Hz, 2H), 1.24 – 1.19 (m, 1H), 0.40 (d, *J* = 6.6 Hz, 6H); **<sup>13</sup>C NMR** (151 MHz, DMSO) δ 160.7, 151.4, 146.5, 142.0, 140.6, 132.6, 129.3, 129.0, 128.5, 128.3, 127.8, 127.8, 123.9, 37.7, 28.9, 28.8, 22.3; **HRMS** (ESI) *m/z*: [M + H]<sup>+</sup> calcd. for C<sub>21</sub>H<sub>22</sub>N 288.1747; found 288.1748.

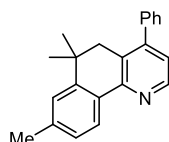

### 6,6,8-trimethyl-4-phenyl-5,6-dihydrobenzo[h]quinoline (4):

According to the general procedure, a mixture consisting of oxime (0.6 mmol, 185.6 mg), enal (0.2 mmol, 26.4 mg), Fe(acac)<sub>2</sub> (0.02 mmol, 5.0 mg), pyrrolidine·HClO<sub>4</sub> (0.04 mmol, 6.8 mg) and 1,4-dioxane (2 mL) under a N<sub>2</sub> atmosphere was stirred at 120 °C for 12 h to afford **4**. White solid (19.0 mg, 31% yield); R<sub>f</sub> = 0.6 (Petroleum ether/Ethyl acetate = 10:1); Mp = 107-108 °C; **<sup>1</sup>H NMR** (600 MHz, CDCl<sub>3</sub>) δ 8.54 (d, *J* = 4.9 Hz, 1H), 8.30 (d, *J* = 7.8 Hz, 1H), 7.47 (t, *J* = 7.3 Hz, 2H), 7.42 (t, *J* = 7.3 Hz, 1H), 7.33 (d, *J* = 7.0 Hz, 2H), 7.22 – 7.15 (m, 2H), 7.08 (d, *J* = 4.9 Hz, 1H), 2.78 (s, 2H), 2.41 (s, 3H), 1.20 (s, 6H); **<sup>13</sup>C NMR** (151 MHz, CDCl<sub>3</sub>) δ 153.0, 148.9, 147.0, 146.2, 139.5, 139.1, 131.0, 128.8, 128.4, 127.9, 127.7, 127.5, 125.9, 124.4, 123.0, 40.2, 33.8, 28.2, 21.7; **HRMS** (ESI) *m/z*: [M + H]<sup>+</sup> calcd. for C<sub>22</sub>H<sub>22</sub>N 300.1747; found 300.1749.

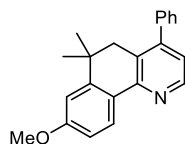

**8-methoxy-6,6-dimethyl-4-phenyl-5,6-dihydrobenzo[h]quinoline (5):**

According to the general procedure, a mixture consisting of oxime (0.6 mmol, 195.2 mg), enal (0.2 mmol, 26.4 mg), Fe(acac)<sub>2</sub> (0.02 mmol, 5.0 mg), pyrrolidine·HClO<sub>4</sub> (0.04 mmol, 6.8 mg) and 1,4-dioxane (2 mL) under a N<sub>2</sub> atmosphere was stirred at 120 °C for 12 h to afford **5**. White solid (40.4 mg, 64% yield); R<sub>f</sub> = 0.5 (Petroleum ether/Ethyl acetate = 10:1); Mp = 128–129 °C; <sup>1</sup>H NMR (600 MHz, CDCl<sub>3</sub>): δ 8.52 (d, *J* = 4.9 Hz, 1H), 8.40–8.34 (m, 1H), 7.47 (t, *J* = 7.3 Hz, 2H), 7.42 (t, *J* = 7.3 Hz, 1H), 7.36 – 7.31 (m, 2H), 7.05 (d, *J* = 4.9 Hz, 1H), 6.93 – 6.88 (m, 2H), 3.88 (s, 3H), 2.78 (s, 2H), 1.20 (s, 6H); <sup>13</sup>C NMR (151 MHz, CDCl<sub>3</sub>): δ 161.0, 152.8, 148.9, 148.2, 146.9, 139.1, 128.7, 128.4, 127.8, 127.6, 127.0, 126.7, 122.6, 111.3, 110.1, 55.3, 40.1, 34.0, 28.1; HRMS (ESI) *m/z*: [M + H]<sup>+</sup> calcd. for C<sub>22</sub>H<sub>22</sub>NO 316.1696; found 316.1692.

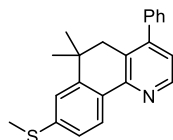

**6,6-dimethyl-8-(methylthio)-4-phenyl-5,6-dihydrobenzo[h]quinoline (6):**

According to the general procedure, a mixture consisting of oxime (0.6 mmol, 204.9 mg), enal (0.2 mmol, 26.4 mg), Fe(acac)<sub>2</sub> (0.02 mmol, 5.0 mg), pyrrolidine·HClO<sub>4</sub> (0.04 mmol, 6.8 mg) and 1,4-dioxane (2 mL) under a N<sub>2</sub> atmosphere was stirred at 120 °C for 12 h to afford **6**. White solid (34.0 mg, 51% yield); R<sub>f</sub> = 0.5 (Petroleum ether/Ethyl acetate = 10:1); Mp = 141–142 °C; <sup>1</sup>H NMR (600 MHz, CDCl<sub>3</sub>): δ 8.54 (d, *J* = 4.9 Hz, 1H), 8.35 (d, *J* = 8.1 Hz, 1H), 7.49–7.44 (m, 2H), 7.44 – 7.40 (m, 1H), 7.34 – 7.31 (m, 2H), 7.26 – 7.23 (m, 2H), 7.08 (d, *J* = 4.9 Hz, 1H), 2.78 (s, 2H), 2.54 (s, 3H), 1.21 (s, 6H); <sup>13</sup>C NMR (151 MHz, CDCl<sub>3</sub>): δ 152.5, 149.0, 147.1, 146.7, 140.2, 138.9, 130.7, 128.7, 128.5, 127.9, 127.6, 126.5, 124.3, 123.1, 121.9, 40.1, 34.0, 28.1, 15.7; HRMS (ESI) *m/z*: [M + H]<sup>+</sup> calcd. for C<sub>22</sub>H<sub>22</sub>NS 332.1467; found 332.1464.

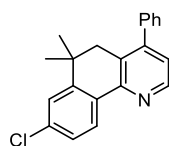

**8-chloro-6,6-dimethyl-4-phenyl-5,6-dihydrobenzo[h]quinoline (7):**

According to the general procedure, a mixture consisting of oxime (0.6 mmol, 197.9 mg), enal (0.2 mmol, 26.4 mg), Fe(acac)<sub>2</sub> (0.02 mmol, 5.0 mg), pyrrolidine·HClO<sub>4</sub> (0.04 mmol, 6.8 mg) and 1,4-dioxane (2 mL) under a N<sub>2</sub> atmosphere was stirred at 120 °C for 12 h to afford **7**. White solid (33.9 mg, 53% yield); R<sub>f</sub> = 0.6 (Petroleum ether/Ethyl acetate = 10:1); Mp = 108–110 °C; <sup>1</sup>H NMR (600 MHz, CDCl<sub>3</sub>) δ 8.55 (d, *J* = 4.8 Hz, 1H), 8.36 (d, *J* = 8.9 Hz, 1H), 7.48 (t, *J* = 7.2 Hz, 2H), 7.44 (t, *J* = 7.2 Hz, 1H), 7.36 – 7.30 (m, 4H), 7.12 (d, *J* = 4.8 Hz, 1H), 2.80 (s, 2H), 1.21 (s, 6H); <sup>13</sup>C NMR (151 MHz, DMSO) δ 147.2, 144.5, 143.3, 142.4, 134.0, 130.8, 127.4, 123.9, 123.7, 123.3, 123.1, 122.7, 122.2, 119.4, 118.8, 35.2, 29.3, 23.2; HRMS (ESI) *m/z*: [M + H]<sup>+</sup> calcd. for C<sub>21</sub>H<sub>19</sub>ClN 320.1201; found 320.1196.



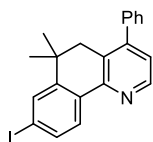

**8-iodo-6,6-dimethyl-4-phenyl-5,6-dihydrobenzo[h]quinoline (8):**

According to the general procedure, a mixture consisting of oxime (0.6 mmol, 252.7 mg), enal (0.2 mmol, 26.4 mg), Fe(acac)<sub>3</sub> (0.02 mmol, 5.0 mg), pyrrolidine·HClO<sub>4</sub> (0.04 mmol, 6.8 mg) and 1,4-dioxane (2 mL) under a N<sub>2</sub> atmosphere was stirred at 120 °C for 12 h to afford **8**. White solid (28.0 mg, 34% yield); R<sub>f</sub> = 0.6 (Petroleum ether/Ethyl acetate = 10:1); Mp = 119–121 °C; <sup>1</sup>H NMR (600 MHz, CDCl<sub>3</sub>): δ 8.55 (d, *J* = 4.9 Hz, 1H), 8.13 (d, *J* = 8.2 Hz, 1H), 7.71 (d, *J* = 8.3 Hz, 1H), 7.69 (s, 1H), 7.48 (t, *J* = 7.3 Hz, 2H), 7.44 (t, *J* = 7.3 Hz, 1H), 7.32 (d, *J* = 7.2 Hz, 2H), 7.13 (d, *J* = 4.9 Hz, 1H), 2.78 (s, 2H), 1.20 (s, 6H); <sup>13</sup>C NMR (151 MHz, CDCl<sub>3</sub>): δ 152.1, 149.3, 148.4, 147.2, 138.7, 136.0, 133.2, 133.1, 128.7, 128.5, 128.1, 128.0, 127.8, 123.8, 96.3, 39.95, 33.9, 28.0; HRMS (ESI) *m/z*: [M + H]<sup>+</sup> calcd. for C<sub>21</sub>H<sub>19</sub>IN 412.0557; found 412.0551.

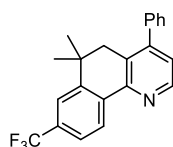

**6,6-dimethyl-4-phenyl-8-(trifluoromethyl)-5,6-dihydrobenzo[h]quinoline (9):**

According to the general procedure, a mixture consisting of oxime (0.6 mmol, 218.0 mg), enal (0.2 mmol, 26.4 mg), Fe(acac)<sub>3</sub> (0.02 mmol, 5.0 mg), pyrrolidine·HClO<sub>4</sub> (0.04 mmol, 6.8 mg) and 1,4-dioxane (2 mL) under a N<sub>2</sub> atmosphere was stirred at 120 °C for 12 h to afford **9**. White solid (35.3 mg, 50% yield); R<sub>f</sub> = 0.6 (Petroleum ether/Ethyl acetate = 10:1); Mp = 130–132 °C; <sup>1</sup>H NMR (600 MHz, CDCl<sub>3</sub>): δ 8.60 (d, *J* = 4.9 Hz, 1H), 8.54 (d, *J* = 8.1 Hz, 1H), 7.63 (d, *J* = 8.5 Hz, 1H), 7.61 (s, 1H), 7.50 (t, *J* = 7.2 Hz, 2H), 7.45 (t, *J* = 7.3 Hz, 1H), 7.36 – 7.32 (m, 2H), 7.18 (d, *J* = 4.9 Hz, 1H), 2.84 (s, 2H), 1.25 (s, 6H); <sup>13</sup>C NMR (151 MHz, CDCl<sub>3</sub>): δ 151.5, 149.4, 147.4, 146.8, 138.6, 136.9, 131.2 (q, <sup>2</sup>J<sub>C-F</sub> = 32.0 Hz), 128.7, 128.6, 128.1, 126.4, 124.4 (q, <sup>1</sup>J<sub>C-F</sub> = 272.4 Hz), 124.2, 123.6 (q, <sup>3</sup>J<sub>C-F</sub> = 3.8 Hz), 120.8 (q, <sup>3</sup>J<sub>C-F</sub> = 3.8 Hz), 39.80, 34.03, 27.94; <sup>19</sup>F NMR (565 MHz, CDCl<sub>3</sub>): δ -62.48; HRMS (ESI) *m/z*: [M + H]<sup>+</sup> calcd. for C<sub>22</sub>H<sub>19</sub>F<sub>3</sub>N 354.1464; found 354.1463.

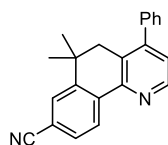

**6,6-dimethyl-4-phenyl-5,6-dihydrobenzo[h]quinoline-8-carbonitrile (10):**

According to the general procedure, a mixture consisting of oxime (0.6 mmol, 192.2 mg), enal (0.2 mmol, 26.4 mg), Fe(acac)<sub>3</sub> (0.02 mmol, 5.0 mg), pyrrolidine·HClO<sub>4</sub> (0.04 mmol, 6.8 mg) and 1,4-dioxane (2 mL) under a N<sub>2</sub> atmosphere was stirred at 120 °C for 12 h to afford **10**. White solid (33.5 mg, 54% yield); R<sub>f</sub> = 0.4 (Petroleum ether/Ethyl acetate = 40:1); Mp = 201–202 °C; <sup>1</sup>H NMR (600 MHz, CDCl<sub>3</sub>): δ 8.61 (d, *J* = 4.9 Hz, 1H), 8.54 – 8.51 (m, 1H), 7.67–7.62 (m, 2H), 7.52–7.47 (m, 2H), 7.47 – 7.43 (m, 1H), 7.35 – 7.29 (m, 2H), 7.20 (d, *J* = 4.9 Hz, 1H), 2.84 (s, 2H), 1.23 (s, 6H); <sup>13</sup>C NMR (151 MHz, CDCl<sub>3</sub>): δ 150.9, 149.6, 147.5, 147.1, 138.3, 137.8, 130.4, 128.8, 128.6, 128.6, 128.2, 127.9, 126.6, 124.5, 119.2, 112.8, 39.6, 34.0, 27.8; HRMS (ESI) *m/z*:

$[M + H]^+$  calcd. for  $C_{22}H_{19}N_2$  311.1543; found 311.1537.

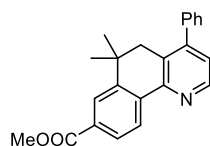

**methyl 6,6-dimethyl-4-phenyl-5,6-dihydrobenzo[h]quinoline-8-carboxylate (11):**

According to the general procedure, a mixture consisting of oxime (0.6 mmol, 212.0 mg), enal (0.2 mmol, 26.4 mg),  $Fe(acac)_2$  (0.02 mmol, 5.0 mg), pyrrolidine· $HClO_4$  (0.04 mmol, 6.8 mg) and 1,4-dioxane (2 mL) under a  $N_2$  atmosphere was stirred at 120 °C for 12 h to afford **11**. White solid (26.3 mg, 38% yield);  $R_f$  = 0.4 (Petroleum ether/Ethyl acetate = 10:1);  $M_p$  = 148–149 °C;  $^1H$  NMR (600 MHz,  $CDCl_3$ )  $\delta$  8.60 (d,  $J$  = 4.8 Hz, 1H), 8.49 (d,  $J$  = 8.1 Hz, 1H), 8.06 (s, 1H), 8.03 (d,  $J$  = 8.1 Hz, 1H), 7.48 (t,  $J$  = 7.2 Hz, 2H), 7.44 (t,  $J$  = 7.2 Hz, 1H), 7.33 (d,  $J$  = 6.9 Hz, 2H), 7.16 (d,  $J$  = 4.8 Hz, 1H), 3.94 (s, 3H), 2.83 (s, 2H), 1.25 (s, 6H);  $^{13}C$  NMR (151 MHz,  $CDCl_3$ )  $\delta$  167.2, 151.8, 149.4, 147.3, 146.3, 138.7, 137.8, 130.8, 128.9, 128.7, 128.5, 128.1, 127.9, 126.0, 125.3, 124.1, 52.0, 40.0, 34.0, 28.0; HRMS (ESI)  $m/z$ :  $[M + H]^+$  calcd. for  $C_{23}H_{22}NO_2$  344.1645; found 344.1644.

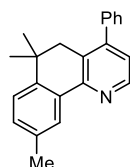

**6,6,9-trimethyl-4-phenyl-5,6-dihydrobenzo[h]quinoline (12):**

According to the general procedure, a mixture consisting of oxime (0.6 mmol, 185.6 mg), enal (0.2 mmol, 26.4 mg),  $Fe(acac)_2$  (0.02 mmol, 5.0 mg), pyrrolidine· $HClO_4$  (0.04 mmol, 6.8 mg) and 1,4-dioxane (2 mL) under a  $N_2$  atmosphere was stirred at 120 °C for 12 h to afford **12**. White solid (26.0 mg, 43% yield);  $R_f$  = 0.6 (Petroleum ether/Ethyl acetate = 10:1);  $M_p$  = 120–121 °C;  $^1H$  NMR (600 MHz,  $CDCl_3$ )  $\delta$  8.57 (d,  $J$  = 4.8 Hz, 1H), 8.24 (s, 1H), 7.48 (t,  $J$  = 7.2 Hz, 2H), 7.43 (t,  $J$  = 7.3 Hz, 1H), 7.34 (d,  $J$  = 7.1 Hz, 2H), 7.27 (d,  $J$  = 7.9 Hz, 1H), 7.21 (d,  $J$  = 7.7 Hz, 1H), 7.11 (d,  $J$  = 4.8 Hz, 1H), 2.79 (s, 2H), 2.43 (s, 3H), 1.20 (s, 6H);  $^{13}C$  NMR (151 MHz,  $CDCl_3$ )  $\delta$  152.9, 149.2, 147.0, 143.5, 139.0, 136.3, 133.3, 130.4, 128.7, 128.4, 128.2, 127.9, 126.3, 123.7, 123.2, 40.3, 33.5, 28.2, 21.1; HRMS (ESI)  $m/z$ :  $[M + H]^+$  calcd. for  $C_{22}H_{22}N$  300.1747; found 300.1750.

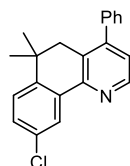

**9-chloro-6,6-dimethyl-4-phenyl-5,6-dihydrobenzo[h]quinoline (13):**

According to the general procedure, a mixture consisting of oxime (0.6 mmol, 197.9 mg), enal (0.2 mmol, 26.4 mg),  $Fe(acac)_2$  (0.02 mmol, 5.0 mg), pyrrolidine· $HClO_4$  (0.04 mmol, 6.8 mg) and 1,4-dioxane (2 mL) under a  $N_2$  atmosphere was stirred at 120 °C for 12 h to afford **13**. White solid (45.4 mg, 71% yield);  $R_f$  = 0.6 (Petroleum ether/Ethyl acetate = 10:1);  $M_p$  = 137–138 °C;  $^1H$  NMR (600 MHz,  $CDCl_3$ )  $\delta$  8.57 (d,  $J$  = 4.8 Hz, 1H), 8.41 (d,  $J$  = 1.8 Hz, 1H), 7.52 – 7.46 (m, 2H), 7.46 – 7.41 (m, 1H), 7.35–7.32 (m, 3H), 7.30 (d,  $J$  = 8.3 Hz, 1H), 7.14 (d,  $J$  = 4.8 Hz, 1H), 2.80 (s, 2H), 1.20 (s, 6H);  $^{13}C$  NMR (151 MHz,  $CDCl_3$ )  $\delta$  151.6, 149.3, 147.2, 144.5, 138.7, 135.3, 132.9,

129.4, 128.7, 128.5, 128.3, 128.0, 125.8, 125.4, 123.9, 39.9, 33.7, 28.1; **HRMS** (ESI)  $m/z$ :  $[M + H]^+$  calcd. for  $C_{21}H_{19}ClN$  320.1201; found 320.1205.

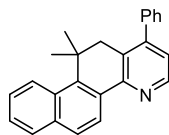

**11,11-dimethyl-1-phenyl-11,12-dihydronaphtho[1,2-h]quinoline (14):**

According to the general procedure, a mixture consisting of oxime (0.6 mmol, 207.2 mg), enal (0.2 mmol, 26.4 mg),  $Fe(acac)_2$  (0.02 mmol, 5.0 mg), pyrrolidine· $HClO_4$  (0.04 mmol, 6.8 mg) and 1,4-dioxane (2 mL) under a  $N_2$  atmosphere was stirred at 120 °C for 12 h to afford **14**. White solid (27.0 mg, 40% yield);  $R_f$  = 0.6 (Petroleum ether/Ethyl acetate = 10:1);  $M_p$  = 170–171 °C;  **$^1H$  NMR** (600 MHz,  $CDCl_3$ )  $\delta$  8.60 (d,  $J$  = 4.8 Hz, 1H), 8.56 (d,  $J$  = 8.4 Hz, 1H), 8.41 – 8.36 (m, 1H), 7.89–7.86 (m, 1H), 7.85 (d,  $J$  = 8.4 Hz, 1H), 7.50 (t,  $J$  = 7.2 Hz, 2H), 7.47 – 7.42 (m, 3H), 7.41 – 7.37 (m, 2H), 7.13 (d,  $J$  = 4.8 Hz, 1H), 2.94 (s, 2H), 1.59 (s, 7H);  **$^{13}C$  NMR** (151 MHz,  $CDCl_3$ )  $\delta$  153.4, 148.5, 147.3, 142.79, 138.8, 135.6, 132.4, 131.3, 129.3, 128.9, 128.5, 128.0, 127.9, 127.2, 126.6, 125.5, 124.8, 124.0, 123.2, 43.8, 36.1, 28.8; **HRMS** (ESI)  $m/z$ :  $[M + H]^+$  calcd. for  $C_{25}H_{22}N$  336.1747; found 336.1741.

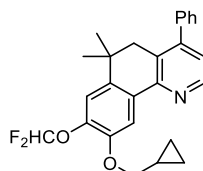

**9-(cyclopropylmethoxy)-8-(difluoromethoxy)-6,6-dimethyl-4-phenyl-5,6-dihydrobenzo[h]quinoline (15):**

According to the general procedure, a mixture consisting of oxime (0.6 mmol, 258.9 mg), enal (0.2 mmol, 26.4 mg),  $Fe(acac)_2$  (0.02 mmol, 5.0 mg), pyrrolidine· $HClO_4$  (0.04 mmol, 6.8 mg) and 1,4-dioxane (2 mL) under a  $N_2$  atmosphere was stirred at 120 °C for 12 h to afford **15**. White solid (61.8 mg, 73% yield);  $R_f$  = 0.45 (Petroleum ether/Ethyl acetate = 10:1);  $M_p$  = 87–89 °C;  **$^1H$  NMR** (600 MHz,  $CDCl_3$ )  $\delta$  8.54 (d,  $J$  = 4.9 Hz, 1H), 8.04 (s, 1H), 7.48 (t,  $J$  = 7.3 Hz, 2H), 7.43 (t,  $J$  = 7.3 Hz, 1H), 7.34 – 7.30 (m, 2H), 7.14 (s, 1H), 7.11 (d,  $J$  = 4.9 Hz, 1H), 6.74 (t,  $J$  = 75.9 Hz, 1H), 4.03 (d,  $J$  = 6.9 Hz, 2H), 2.78 (s, 2H), 1.37 – 1.31 (m, 1H), 1.18 (s, 6H), 0.68 – 0.63 (m, 2H), 0.41–0.36 (m, 2H);  **$^{13}C$  NMR** (151 MHz,  $CDCl_3$ )  $\delta$  151.9, 149.3, 149.1, 147.0, 141.5, 139.8, 138.8, 132.0, 128.7, 128.5, 128.1, 128.0, 123.5, 118.5, 116.4 (t,  $^1J_{C-F}$  = 259.2 Hz), 111.7, 74.0, 40.1, 33.4, 28.1, 10.3, 3.1.  **$^{19}F$  NMR** (565 MHz,  $CDCl_3$ )  $\delta$  -81.45; **HRMS** (ESI)  $m/z$ :  $[M + H]^+$  calcd. for  $C_{26}H_{26}F_2NO_2$  422.1926; found 422.1923.

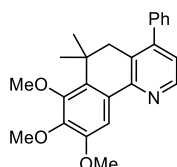

**7,8,9-trimethoxy-6,6-dimethyl-4-phenyl-5,6-dihydrobenzo[h]quinoline (16):**

According to the general procedure, a mixture consisting of oxime (0.6 mmol, 231.2 mg), enal (0.2 mmol, 26.4 mg),  $Fe(acac)_2$  (0.02 mmol, 5.0 mg), pyrrolidine· $HClO_4$  (0.04 mmol, 6.8 mg) and 1,4-dioxane (2 mL) under a  $N_2$  atmosphere was stirred at 120 °C for 12 h to afford **16**. White solid

(42.0 mg, 56% yield);  $R_f$  = 0.4 (Petroleum ether/Ethyl acetate = 10:1);  $M_p$  = 155–157 °C;  $^1\text{H}$  NMR (600 MHz,  $\text{CDCl}_3$ ):  $\delta$  8.52 (d,  $J$  = 4.9 Hz, 1H), 7.90 (s, 1H), 7.47 (t,  $J$  = 7.3 Hz, 2H), 7.44–7.40 (m, 1H), 7.36–7.31 (m, 2H), 7.07 (d,  $J$  = 4.9 Hz, 1H), 4.00 (s, 3H), 3.91 (s, 3H), 3.90 (s, 3H), 2.76 (s, 2H), 1.32 (s, 6H);  $^{13}\text{C}$  NMR (151 MHz,  $\text{CDCl}_3$ ):  $\delta$  152.5, 152.3, 152.2, 148.7, 146.8, 144.3, 138.9, 132.1, 130.1, 128.7, 128.4, 127.9, 127.4, 123.0, 105.2, 60.8, 60.5, 56.0, 42.3, 34.4, 28.3; HRMS (ESI)  $m/z$ :  $[\text{M} + \text{H}]^+$  calcd. for  $\text{C}_{24}\text{H}_{26}\text{NO}_3$  376.1907; found 376.1900.

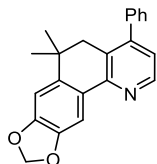

**6,6-dimethyl-4-phenyl-5,6-dihydro-[1,3]dioxolo[4',5':4,5]benzo[1,2-h]quinoline (17):**

According to the general procedure, a mixture consisting of oxime (0.6 mmol, 203.6 mg), enal (0.2 mmol, 26.4 mg),  $\text{Fe}(\text{acac})_2$  (0.02 mmol, 5.0 mg), pyrrolidine· $\text{HClO}_4$  (0.04 mmol, 6.8 mg) and 1,4-dioxane (2 mL) under a  $\text{N}_2$  atmosphere was stirred at 120 °C for 12 h to afford **17**. White solid (45.5 mg, 69% yield);  $R_f$  = 0.45 (Petroleum ether/Ethyl acetate = 10:1);  $M_p$  = 160–161 °C;  $^1\text{H}$  NMR (600 MHz,  $\text{CDCl}_3$ )  $\delta$  8.51 (d,  $J$  = 4.8 Hz, 1H), 7.93 (s, 1H), 7.47 (t,  $J$  = 7.2 Hz, 2H), 7.42 (t,  $J$  = 7.3 Hz, 1H), 7.34 – 7.30 (m, 2H), 7.05 (d,  $J$  = 4.8 Hz, 1H), 6.86 (s, 1H), 5.98 (s, 2H), 2.76 (s, 2H), 1.17 (s, 6H);  $^{13}\text{C}$  NMR (151 MHz,  $\text{CDCl}_3$ )  $\delta$  152.7, 149.0, 148.9, 146.9, 146.6, 141.5, 139.1, 128.8, 128.5, 128.1, 127.9, 127.2, 122.8, 106.2, 104.3, 101.1, 40.2, 34.0, 28.3; HRMS (ESI)  $m/z$ :  $[\text{M} + \text{H}]^+$  calcd. for  $\text{C}_{22}\text{H}_{20}\text{NO}_2$  330.1489; found 330.1492.

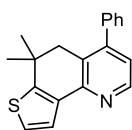

**6,6-dimethyl-4-phenyl-5,6-dihydrothieno[2,3-h]quinoline (18):**

According to the general procedure, a mixture consisting of oxime (0.6 mmol, 180.8 mg), enal (0.2 mmol, 26.4 mg),  $\text{Fe}(\text{acac})_2$  (0.02 mmol, 5.0 mg), pyrrolidine· $\text{HClO}_4$  (0.04 mmol, 6.8 mg) and 1,4-dioxane (2 mL) under a  $\text{N}_2$  atmosphere was stirred at 120 °C for 12 h to afford **18**. White solid (33.8 mg, 58% yield);  $R_f$  = 0.5 (Petroleum ether/Ethyl acetate = 10:1);  $M_p$  = 103–105 °C;  $^1\text{H}$  NMR (600 MHz,  $\text{CDCl}_3$ )  $\delta$  8.46 (d,  $J$  = 5.0 Hz, 1H), 7.71 (d,  $J$  = 5.1 Hz, 1H), 7.47 (t,  $J$  = 7.3 Hz, 2H), 7.42 (t,  $J$  = 7.3 Hz, 1H), 7.32 (d,  $J$  = 7.0 Hz, 2H), 7.18 (d,  $J$  = 5.1 Hz, 1H), 7.02 (d,  $J$  = 5.0 Hz, 1H), 2.88 (s, 2H), 1.27 (s, 6H);  $^{13}\text{C}$  NMR (151 MHz,  $\text{CDCl}_3$ )  $\delta$  152.5, 151.1, 149.1, 146.8, 139.3, 135.8, 128.6, 128.5, 127.9, 126.8, 125.1, 122.8, 122.6, 41.2, 34.1, 29.0; HRMS (ESI)  $m/z$ :  $[\text{M} + \text{H}]^+$  calcd. for  $\text{C}_{19}\text{H}_{18}\text{NS}$  292.1154; found 292.1150.

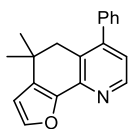

**4,4-dimethyl-6-phenyl-4,5-dihydrofuro[3,2-h]quinoline (19):**

According to the general procedure, a mixture consisting of oxime (0.6 mmol, 171.2 mg), enal (0.2 mmol, 26.4 mg),  $\text{Fe}(\text{acac})_2$  (0.02 mmol, 5.0 mg), pyrrolidine· $\text{HClO}_4$  (0.04 mmol, 6.8 mg) and 1,4-dioxane (2 mL) under a  $\text{N}_2$  atmosphere was stirred at 120 °C for 12 h to afford **19**. White solid (14.4 mg, 26% yield);  $R_f$  = 0.2 (Petroleum ether/Ethyl acetate = 20:1);  $M_p$  = 125–127 °C;  $^1\text{H}$

**NMR** (600 MHz, CDCl<sub>3</sub>)  $\delta$  8.43 (d,  $J$  = 4.9 Hz, 1H), 7.50 (d,  $J$  = 1.4 Hz, 1H), 7.47 (t,  $J$  = 7.3 Hz, 2H), 7.42 (t,  $J$  = 7.2 Hz, 1H), 7.31 (d,  $J$  = 7.0 Hz, 2H), 6.98 (d,  $J$  = 5.0 Hz, 1H), 6.42 (d,  $J$  = 1.4 Hz, 1H), 2.82 (s, 2H), 1.19 (s, 6H); **<sup>13</sup>C NMR** (151 MHz, CDCl<sub>3</sub>)  $\delta$  149.0, 147.5, 146.8, 146.5, 144., 139.1, 133.8, 128.6, 128.5, 127.9, 126.8, 122.4, 108.3, 41.1, 31.6, 27.8; **HRMS** (ESI)  $m/z$ : [M + H]<sup>+</sup> calcd. for C<sub>19</sub>H<sub>18</sub>NO 276.1383; found 276.1379.

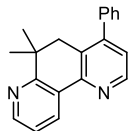

**6,6-dimethyl-4-phenyl-5,6-dihydro-1,7-phenanthroline (20):**

According to the general procedure, a mixture consisting of oxime (0.6 mmol, 177.8 mg), enal (0.2 mmol, 26.4 mg), Fe(acac)<sub>3</sub> (0.02 mmol, 5.0 mg), pyrrolidine·HClO<sub>4</sub> (0.04 mmol, 6.8 mg) and 1,4-dioxane (2 mL) under a N<sub>2</sub> atmosphere was stirred at 120 °C for 12 h to afford **20**. White solid (43.1 mg, 75% yield); R<sub>f</sub> = 0.5 (Petroleum ether/Ethyl acetate = 10:1); Mp = 80–81 °C; **<sup>1</sup>H NMR** (600 MHz, CDCl<sub>3</sub>)  $\delta$  8.66 (dd,  $J$  = 7.8, 1.2 Hz 1H), 8.58 (dd,  $J$  = 4.8, 1.4 Hz, 1H), 8.57 (d,  $J$  = 4.9 Hz, 1H), 7.49 (t,  $J$  = 7.2 Hz, 2H), 7.45 (t,  $J$  = 7.3 Hz, 1H), 7.35 (d,  $J$  = 7.9 Hz, 2H), 7.29 (dd,  $J$  = 7.7, 4.8 Hz, 1H), 7.16 (d,  $J$  = 4.9 Hz, 1H), 2.92 (s, 2H), 1.28 (s, 6H); **<sup>13</sup>C NMR** (151 MHz, CDCl<sub>3</sub>)  $\delta$  164.3, 151.6, 149.7, 149.4, 147.4, 138.6, 133.1, 128.8, 128.7, 128.5, 128.1, 128.1, 123.9, 122.1, 39.7, 36.3, 26.8; **HRMS** (ESI)  $m/z$ : [M + H]<sup>+</sup> calcd. for C<sub>20</sub>H<sub>19</sub>N<sub>2</sub> 287.1543; found 287.1542.

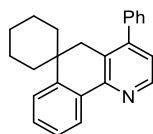

**4-phenyl-5H-spiro[benzo[h]quinoline-6,1'-cyclohexane] (21):**

According to the general procedure, a mixture consisting of oxime (0.6 mmol, 201.3 mg), enal (0.2 mmol, 26.4 mg), Fe(acac)<sub>3</sub> (0.02 mmol, 5.0 mg), pyrrolidine·HClO<sub>4</sub> (0.04 mmol, 6.8 mg) and 1,4-dioxane (2 mL) under a N<sub>2</sub> atmosphere was stirred at 120 °C for 12 h to afford **21**. White solid (32.6 mg, 50% yield); R<sub>f</sub> = 0.6 (Petroleum ether/Ethyl acetate = 50:1); Mp = 134–135 °C; **<sup>1</sup>H NMR** (600 MHz, CDCl<sub>3</sub>)  $\delta$  8.56 (d,  $J$  = 4.7 Hz, 1H), 8.41 (d,  $J$  = 7.0 Hz, 1H), 7.48 (t,  $J$  = 7.1 Hz, 2H), 7.45–7.43 (m, 2H), 7.42 – 7.33 (m, 4H), 7.12 (d,  $J$  = 4.8 Hz, 1H), 2.92 (s, 2H), 1.68 – 1.61 (m, 2H), 1.57–1.50 (m, 3H), 1.50–1.43 (m, 2H), 1.23 – 1.10 (m, 3H); **<sup>13</sup>C NMR** (151 MHz, CDCl<sub>3</sub>)  $\delta$  153.2, 149.1, 147.1, 147.0, 138.9, 134.0, 129.6, 128.6, 128.4, 128.0, 127.6, 126.6, 126.1, 123.2, 123.1, 36.5, 35.0, 32.5, 25.9, 22.1; **HRMS** (ESI)  $m/z$ : [M + H]<sup>+</sup> calcd. for C<sub>24</sub>H<sub>24</sub>N 326.1903; found 326.1892.

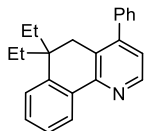

**6,6-diethyl-4-phenyl-5,6-dihydrobenzo[h]quinoline (22):**

According to the general procedure, a mixture consisting of oxime (0.6 mmol, 194.1 mg), enal (0.2 mmol, 26.4 mg), Fe(acac)<sub>3</sub> (0.02 mmol, 5.0 mg), pyrrolidine·HClO<sub>4</sub> (0.04 mmol, 6.8 mg) and 1,4-dioxane (2 mL) under a N<sub>2</sub> atmosphere was stirred at 120 °C for 12 h to afford **22**. White solid (27.6 mg, 44% yield); R<sub>f</sub> = 0.6 (Petroleum ether/Ethyl acetate = 10:1); Mp = 106–108 °C; **<sup>1</sup>H NMR** (600 MHz, CDCl<sub>3</sub>)  $\delta$  8.55 (d,  $J$  = 4.9 Hz, 1H), 8.47–8.43 (m, 1H), 7.47 (t,  $J$  = 7.3 Hz, 2H),

7.43 (t,  $J = 7.4$  Hz, 1H), 7.39 – 7.32 (m, 4H), 7.26-7.24 (m, 1H), 7.09 (d,  $J = 4.9$  Hz, 1H), 2.82 (s, 2H), 1.62-1.57 (m, 2H), 1.56-1.49 (m, 2H), 0.70 (t,  $J = 7.4$  Hz, 6H);  $^{13}\text{C}$  NMR (151 MHz,  $\text{CDCl}_3$ )  $\delta$  152.7, 149.1, 146.9, 142.9, 139.1, 134.6, 128.9, 128.7, 128.4, 128.0, 127.9, 126.5, 126.1, 125.8, 123.3, 40.1, 34.3, 29.6, 8.5; **HRMS** (ESI)  $m/z$ :  $[\text{M} + \text{H}]^+$  calcd. for  $\text{C}_{23}\text{H}_{24}\text{N}$  314.1903; found 314.1896.

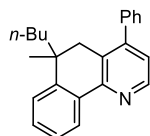

#### 6-butyl-6-methyl-4-phenyl-5,6-dihydrobenzo[h]quinoline (23):

According to the general procedure, a mixture consisting of oxime (0.6 mmol, 202.5 mg), enal (0.2 mmol, 26.4 mg),  $\text{Fe}(\text{acac})_2$  (0.02 mmol, 5.0 mg), pyrrolidine· $\text{HClO}_4$  (0.04 mmol, 6.8 mg) and 1,4-dioxane (2 mL) under a  $\text{N}_2$  atmosphere was stirred at 120 °C for 12 h to afford **23**. Colorless oil (40.5 mg, 61% yield);  $R_f = 0.6$  (Petroleum ether/Ethyl acetate = 10:1);  $^1\text{H}$  NMR (600 MHz,  $\text{CDCl}_3$ )  $\delta$  8.56 (d,  $J = 4.8$  Hz, 1H), 8.43-8.39 (m, 1H), 7.47 (t,  $J = 7.3$  Hz, 2H), 7.42 (t,  $J = 7.3$  Hz, 1H), 7.39 – 7.35 (m, 2H), 7.35-7.32 (m, 2H), 7.32 – 7.29 (m, 1H), 7.10 (d,  $J = 4.8$  Hz, 1H), 2.83 (d,  $J = 15.7$  Hz, 1H), 2.77 (d,  $J = 15.7$  Hz, 1H), 1.39-1.31 (m, 2H), 1.28 (s, 3H), 1.10 – 1.00 (m, 3H), 0.99-0.91 (m, 1H), 0.72 (t,  $J = 7.0$  Hz, 3H);  $^{13}\text{C}$  NMR (151 MHz,  $\text{CDCl}_3$ )  $\delta$  153.0, 149.0, 147.0, 145.4, 139.0, 133.9, 129.3, 128.7, 128.4, 128.0, 127.9, 126.6, 125.9, 124.7, 123.3, 39.5, 38.0, 36.8, 26.8, 25.5, 23.1, 13.9; **HRMS** (ESI)  $m/z$ :  $[\text{M} + \text{H}]^+$  calcd. for  $\text{C}_{24}\text{H}_{26}\text{N}$  328.2060; found 328.2057.

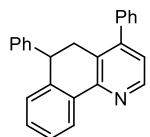

#### 4,6-diphenyl-5,6-dihydrobenzo[h]quinoline (24):

According to the general procedure, a mixture consisting of oxime (0.6 mmol, 206.1 mg), enal (0.2 mmol, 26.4 mg),  $\text{Fe}(\text{acac})_2$  (0.02 mmol, 5.0 mg), pyrrolidine· $\text{HClO}_4$  (0.04 mmol, 6.8 mg) and 1,4-dioxane (2 mL) under a  $\text{N}_2$  atmosphere was stirred at 120 °C for 12 h to afford **24**. White solid (16.8 mg, 25% yield);  $R_f = 0.6$  (Petroleum ether/Ethyl acetate = 10:1);  $\text{Mp} = 141\text{--}143$  °C;  $^1\text{H}$  NMR (600 MHz,  $\text{CDCl}_3$ )  $\delta$  8.57 (d,  $J = 4.8$  Hz, 1H), 8.46 (d,  $J = 7.8$  Hz, 1H), 7.45-7.33 (m, 4H), 7.29 (t,  $J = 7.4$  Hz, 1H), 7.24 (d,  $J = 7.8$  Hz, 2H), 7.20 (t,  $J = 7.4$  Hz, 3H), 7.10 (d,  $J = 7.4$  Hz, 2H), 7.08 (d,  $J = 4.8$  Hz, 1H), 6.92 (d,  $J = 7.6$  Hz, 1H), 4.17 (dd,  $J = 8.9, 5.8$  Hz, 1H), 3.25 (dd,  $J = 15.5, 9.3$  Hz, 1H), 3.18 (dd,  $J = 15.5, 5.6$  Hz, 1H);  $^{13}\text{C}$  NMR (151 MHz,  $\text{CDCl}_3$ )  $\delta$  153.0, 149.0, 147.4, 142.9, 140.5, 138.8, 135.0, 129.4, 128.7, 128.5, 128.5, 128.4, 128.0, 127.8, 127.5, 126.7, 125.7, 123.5, 44.0, 33.3; **HRMS** (ESI)  $m/z$ :  $[\text{M} + \text{H}]^+$  calcd. for  $\text{C}_{25}\text{H}_{20}\text{N}$  334.1590; found 334.1596.

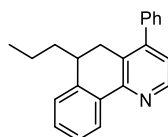

#### 4-phenyl-6-propyl-5,6-dihydrobenzo[h]quinoline (25):

According to the general procedure, a mixture consisting of oxime (0.6 mmol, 185.6 mg), enal (0.2 mmol, 26.4 mg),  $\text{Fe}(\text{acac})_2$  (0.02 mmol, 5.0 mg), pyrrolidine· $\text{HClO}_4$  (0.04 mmol, 6.8 mg) and 1,4-dioxane (2 mL) under a  $\text{N}_2$  atmosphere was stirred at 120 °C for 12 h to afford **25**. Colorless oil (13.9 mg, 23% yield);  $R_f = 0.6$  (Petroleum ether/Ethyl acetate = 50:1);  $^1\text{H}$  NMR (600 MHz,

CDCl<sub>3</sub>)  $\delta$  8.57 (d,  $J$  = 4.9 Hz, 1H), 8.37 (d,  $J$  = 7.6 Hz, 1H), 7.48 (t,  $J$  = 7.3 Hz, 2H), 7.43 (t,  $J$  = 7.3 Hz, 1H), 7.39 (t,  $J$  = 7.5 Hz, 1H), 7.36 – 7.30 (m, 3H), 7.19 (d,  $J$  = 7.4 Hz, 1H), 7.12 (d,  $J$  = 4.9 Hz, 1H), 3.03 (dd,  $J$  = 15.7, 5.5 Hz, 1H), 2.89 (dd,  $J$  = 15.7, 3.1 Hz, 1H), 2.85 – 2.79 (m, 1H), 1.41 – 1.34 (m, 1H), 1.32 – 1.27 (m, 1H), 1.22 – 1.17 (m, 1H), 1.16 – 1.08 (m, 1H), 0.78 (t,  $J$  = 7.3 Hz, 3H); <sup>13</sup>C NMR (151 MHz, CDCl<sub>3</sub>)  $\delta$  152.8, 149.4, 147.0, 142.2, 139.0, 133.9, 129.0, 128.7, 128.4, 128.0, 127.9, 127.6, 127.1, 125.7, 123.4, 37.6, 36.3, 30.4, 20.6, 14.0; HRMS (ESI)  $m/z$ : [M + H]<sup>+</sup> calcd. for C<sub>25</sub>H<sub>20</sub>N 334.1590; found 334.1596.

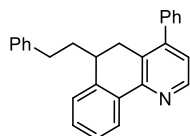

#### 6-phenethyl-4-phenyl-5,6-dihydrobenzo[h]quinoline (26):

According to the general procedure, a mixture consisting of oxime (0.6 mmol, 222.9 mg), enal (0.2 mmol, 26.4 mg), Fe(acac)<sub>3</sub> (0.02 mmol, 5.0 mg), pyrrolidine·HClO<sub>4</sub> (0.04 mmol, 6.8 mg) and 1,4-dioxane (2 mL) under a N<sub>2</sub> atmosphere was stirred at 120 °C for 12 h to afford **26**. Colorless oil (16.0 mg, 22% yield);  $R_f$  = 0.55 (Petroleum ether/Ethyl acetate = 10:1); <sup>1</sup>H NMR (600 MHz, CDCl<sub>3</sub>)  $\delta$  8.56 (d,  $J$  = 4.9 Hz, 1H), 8.39 (d,  $J$  = 7.7 Hz, 1H), 7.47 (t,  $J$  = 7.4 Hz, 2H), 7.43 (t,  $J$  = 7.2 Hz, 1H), 7.40 (t,  $J$  = 7.5 Hz, 1H), 7.36–7.32 (m, 3H), 7.21 – 7.16 (m, 3H), 7.13–7.09 (m, 2H), 6.99 (d,  $J$  = 7.6 Hz, 2H), 3.05 (dd,  $J$  = 15.8, 5.5 Hz, 1H), 2.95 (dd,  $J$  = 15.8, 3.1 Hz, 1H), 2.87 – 2.82 (m, 1H), 2.52 – 2.45 (m, 1H), 2.43 – 2.36 (m, 1H), 1.77–1.69 (m, 1H), 1.66 – 1.62 (m, 1H); <sup>13</sup>C NMR (151 MHz, CDCl<sub>3</sub>)  $\delta$  152.8, 149.4, 147.1, 141.9, 141.7, 139.0, 134.0, 129.1, 128.7, 128.5, 128.2, 128.3, 128.0, 127.6, 127.6, 127.3, 125.9, 125.8, 123.4, 37.4, 35.7, 33.7, 30.3; HRMS (ESI)  $m/z$ : [M + H]<sup>+</sup> calcd. for C<sub>27</sub>H<sub>24</sub>N 362.1903; found 362.1895.

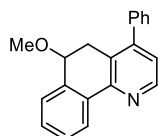

#### 6-methoxy-4-phenyl-5,6-dihydrobenzo[h]quinoline (27):

According to the general procedure, a mixture consisting of oxime (0.6 mmol, 178.4 mg), enal (0.2 mmol, 26.4 mg), Fe(acac)<sub>3</sub> (0.02 mmol, 5.0 mg), pyrrolidine·HClO<sub>4</sub> (0.04 mmol, 6.8 mg) and 1,4-dioxane (2 mL) under a N<sub>2</sub> atmosphere was stirred at 120 °C for 12 h to afford **27**. White solid (18.0 mg, 31% yield);  $R_f$  = 0.5 (Petroleum ether/Ethyl acetate = 10:1); Mp = 128–130 °C; <sup>1</sup>H NMR (600 MHz, CDCl<sub>3</sub>)  $\delta$  8.58 (d,  $J$  = 4.8 Hz, 1H), 8.46 (d,  $J$  = 7.8 Hz, 1H), 7.51 (t,  $J$  = 7.3 Hz, 1H), 7.47 (t,  $J$  = 7.3 Hz, 2H), 7.45 – 7.36 (m, 5H), 7.14 (d,  $J$  = 4.8 Hz, 1H), 4.32 (t,  $J$  = 4.3 Hz, 1H), 3.26 (dd,  $J$  = 16.2, 4.9 Hz, 1H), 3.20 (s, 3H), 3.04 (dd,  $J$  = 16.2, 3.8 Hz, 1H); <sup>13</sup>C NMR (151 MHz, CDCl<sub>3</sub>)  $\delta$  152.04, 149.49, 147.29, 138.82, 135.90, 134.42, 129.04, 128.83, 128.78, 128.47, 128.03, 127.81, 126.38, 126.01, 123.58, 75.82, 56.11, 31.38; HRMS (ESI)  $m/z$ : [M + H]<sup>+</sup> calcd. for C<sub>20</sub>H<sub>18</sub>NO 288.1383; found 288.1379.

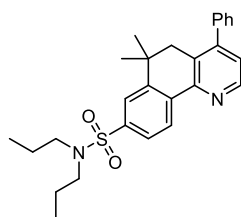

**6,6-dimethyl-4-phenyl-N,N-dipropyl-5,6-dihydrobenzo[h]quinoline-8-sulfonamide (28):**

According to the general procedure, a mixture consisting of oxime (0.6 mmol, 275.2 mg), enal (0.2 mmol, 26.4 mg), Fe(acac)<sub>2</sub> (0.02 mmol, 5.0 mg), pyrrolidine·HClO<sub>4</sub> (0.04 mmol, 6.8 mg) and 1,4-dioxane (2 mL) under a N<sub>2</sub> atmosphere was stirred at 120 °C for 12 h to afford **28**. White solid (71.0 mg, 79% yield); R<sub>f</sub> = 0.45 (Petroleum ether/Ethyl acetate = 10:1); Mp = 99–101 °C; <sup>1</sup>H NMR (600 MHz, CDCl<sub>3</sub>) δ 8.60 (d, *J* = 4.9 Hz, 1H), 8.54 (d, *J* = 8.1 Hz, 1H), 7.80 (s, 1H), 7.79 (d, *J* = 8.2 Hz, 1H), 7.49 (t, *J* = 7.3 Hz, 2H), 7.45 (t, *J* = 7.3 Hz, 1H), 7.33 (d, *J* = 7.0 Hz, 2H), 7.18 (d, *J* = 4.9 Hz, 1H), 3.16 – 3.10 (m, 4H), 2.85 (s, 2H), 1.60 – 1.52 (m, 4H), 1.25 (s, 6H), 0.88 (t, *J* = 7.4 Hz, 6H); <sup>13</sup>C NMR (151 MHz, CDCl<sub>3</sub>) δ 151.3, 149.5, 147.5, 147.1, 140.8, 138.5, 137.2, 128.7, 128.7, 128.6, 128.2, 126.6, 125.3, 124.3, 122.8, 77.2, 77.0, 76.8, 49.8, 39.8, 34.1, 28.0, 21.8, 11.2; HRMS (ESI) *m/z*: [M + H]<sup>+</sup> calcd. for C<sub>27</sub>H<sub>33</sub>N<sub>2</sub>O<sub>2</sub>S 449.2257; found 449.2258.

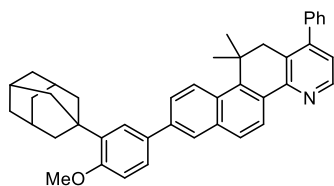**8-(3-(adamantan-1-yl)-4-methoxyphenyl)-11,11-dimethyl-1-phenyl-11,12-dihydronaphtho[1,2-h]quinoline (29):**

According to the general procedure, a mixture consisting of oxime (0.6 mmol, 351.4 mg), enal (0.2 mmol, 26.4 mg), Fe(acac)<sub>2</sub> (0.02 mmol, 5.0 mg), pyrrolidine·HClO<sub>4</sub> (0.04 mmol, 6.8 mg) and 1,4-dioxane (2 mL) under a N<sub>2</sub> atmosphere was stirred at 120 °C for 12 h to afford **29**. White solid (46.2 mg, 40% yield); R<sub>f</sub> = 0.55 (Petroleum ether/Ethyl acetate = 10:1); Mp = 237–238 °C; <sup>1</sup>H NMR (600 MHz, CDCl<sub>3</sub>) δ 8.60 (d, *J* = 4.8 Hz, 1H), 8.57 (d, *J* = 8.5 Hz, 1H), 8.42 (d, *J* = 8.9 Hz, 1H), 8.02 (s, 1H), 7.89 (d, *J* = 8.5 Hz, 1H), 7.70 (d, *J* = 8.4 Hz, 1H), 7.62 (s, 1H), 7.55 (d, *J* = 7.2 Hz, 1H), 7.50 (t, *J* = 6.9 Hz, 2H), 7.45 (t, *J* = 6.9 Hz, 1H), 7.39 (d, *J* = 6.9 Hz, 2H), 7.12 (d, *J* = 4.6 Hz, 1H), 6.99 (d, *J* = 8.3 Hz, 1H), 3.90 (s, 3H), 2.95 (s, 2H), 2.20 (s, 6H), 2.10 (s, 3H), 1.81 (s, 6H), 1.61 (s, 6H); <sup>13</sup>C NMR (151 MHz, CDCl<sub>3</sub>) δ 158.7, 153.4, 148.4, 147.2, 142.7, 139.0, 138.8, 138.4, 136.1, 132.7, 132.0, 130.0, 128.8, 128.5, 128.0, 127.9, 127.1, 126.9, 126.1, 125.8, 125.4, 124.4, 124.3, 123.0, 112.2, 55.2, 43.7, 40.7, 37.3, 37.2, 36.0, 29.2, 28.9; HRMS (ESI) *m/z*: [M + H]<sup>+</sup> calcd. for C<sub>42</sub>H<sub>42</sub>NO 576.3261; found 576.3260.

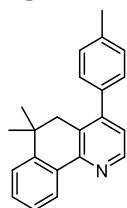**6,6-dimethyl-4-(p-tolyl)-5,6-dihydrobenzo[h]quinoline (30):**

According to the general procedure, a mixture consisting of oxime (0.6 mmol, 177.2 mg), enal (0.2 mmol, 29.2 mg), Fe(acac)<sub>2</sub> (0.02 mmol, 5.0 mg), pyrrolidine·HClO<sub>4</sub> (0.04 mmol, 6.8 mg) and 1,4-dioxane (2 mL) under a N<sub>2</sub> atmosphere was stirred at 120 °C for 12 h to afford **30**. White solid (40.0 mg, 66% yield); R<sub>f</sub> = 0.6 (Petroleum ether/Ethyl acetate = 10:1); Mp = 115–116 °C; <sup>1</sup>H NMR (600 MHz, CDCl<sub>3</sub>) δ 8.55 (d, *J* = 4.7 Hz, 1H), 8.44–8.38 (m, 1H), 7.40–7.34 (m, 3H), 7.28 (d, *J* = 7.6 Hz, 2H), 7.23 (d, *J* = 7.7 Hz, 2H), 7.10 (d, *J* = 4.8 Hz, 1H), 2.82 (s, 2H), 2.44 (s, 3H), 1.21 (s, 6H); <sup>13</sup>C NMR (151 MHz, CDCl<sub>3</sub>) δ 152.8, 149.1, 147.0, 146.3, 137.8, 136.0, 133.7, 129.6, 129.2, 128.7, 128.1, 126.7, 125.9, 123.7, 123.4, 40.1, 33.8, 28.1, 21.2; HRMS (ESI) *m/z*:



$[M + H]^+$  calcd. for  $C_{22}H_{22}N$  300.1747; Found 300.1751.

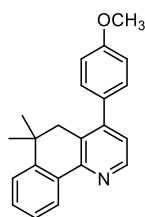

**4-(4-methoxyphenyl)-6,6-dimethyl-5,6-dihydrobenzo[h]quinoline (31):**

According to the general procedure, a mixture consisting of oxime (0.6 mmol, 177.2 mg), enal (0.2 mmol, 32.4 mg),  $Fe(acac)_2$  (0.02 mmol, 5.0 mg), pyrrolidine· $HClO_4$  (0.04 mmol, 6.8 mg) and 1,4-dioxane (2 mL) under a  $N_2$  atmosphere was stirred at 120 °C for 12 h to afford **31**. White solid (50.2 mg, 79% yield);  $R_f$  = 0.5 (Petroleum ether/Ethyl acetate = 10:1);  $M_p$  = 101–102 °C;  $^1H$  NMR (600 MHz,  $CDCl_3$ )  $\delta$  8.55 (d,  $J$  = 4.9 Hz, 1H), 8.44–8.38 (m, 1H), 7.39 – 7.35 (m, 3H), 7.28 (d,  $J$  = 8.4 Hz, 2H), 7.10 (d,  $J$  = 4.9 Hz, 1H), 7.01 (d,  $J$  = 8.4 Hz, 2H), 3.88 (s, 3H), 2.83 (s, 2H), 1.22 (s, 6H);  $^{13}C$  NMR (151 MHz,  $CDCl_3$ )  $\delta$  159.5, 152.8, 148.7, 147.0, 146.2, 133.7, 131.3, 130.0, 129.6, 128.1, 126.7, 125.9, 123.6, 123.4, 113.9, 55.3, 40.2, 33.9, 28.1; HRMS (ESI)  $m/z$ :  $[M + H]^+$  calcd. for  $C_{22}H_{22}NO$  316.1696; Found 316.1699.

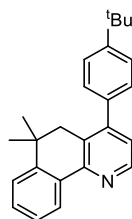

**4-(4-(tert-butyl)phenyl)-6,6-dimethyl-5,6-dihydrobenzo[h]quinoline (32):**

According to the general procedure, a mixture consisting of oxime (0.6 mmol, 177.2 mg), enal (0.2 mmol, 37.6 mg),  $Fe(acac)_2$  (0.02 mmol, 5.0 mg), pyrrolidine· $HClO_4$  (0.04 mmol, 6.8 mg) and 1,4-dioxane (2 mL) under a  $N_2$  atmosphere was stirred at 120 °C for 12 h to afford **32**. White solid (48.5 mg, 71% yield);  $R_f$  = 0.6 (Petroleum ether/Ethyl acetate = 10:1);  $M_p$  = 155–157 °C;  $^1H$  NMR (600 MHz,  $CDCl_3$ )  $\delta$  8.55 (d,  $J$  = 4.9 Hz, 1H), 8.43 – 8.39 (m, 1H), 7.49 (d,  $J$  = 8.3 Hz, 2H), 7.39 – 7.35 (m, 3H), 7.28 (d,  $J$  = 8.3 Hz, 2H), 7.11 (d,  $J$  = 4.9 Hz, 1H), 2.84 (s, 2H), 1.39 (s, 9H), 1.23 (s, 6H);  $^{13}C$  NMR (151 MHz,  $CDCl_3$ )  $\delta$  152.8, 151.0, 149.1, 147.0, 146.3, 136.0, 133.7, 129.6, 128.5, 128.2, 126.7, 125.9, 125.4, 123.7, 123.5, 40.2, 34.71, 33.9, 31.4, 28.2; HRMS (ESI)  $m/z$ :  $[M + H]^+$  calcd. for  $C_{25}H_{28}N$  342.2216; Found 342.2215.

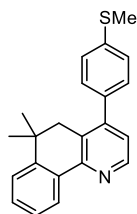

**6,6-dimethyl-4-(4-(methylthio)phenyl)-5,6-dihydrobenzo[h]quinoline (33):**

According to the general procedure, a mixture consisting of oxime (0.6 mmol, 177.2 mg), enal (0.2 mmol, 35.6 mg),  $Fe(acac)_2$  (0.02 mmol, 5.0 mg), pyrrolidine· $HClO_4$  (0.04 mmol, 6.8 mg) and 1,4-dioxane (2 mL) under a  $N_2$  atmosphere was stirred at 120 °C for 12 h to afford **33**. White solid (47.2 mg, 71% yield);  $R_f$  = 0.55 (Petroleum ether/Ethyl acetate = 10:1);  $M_p$  = 99–100 °C;  $^1H$

**NMR** (600 MHz, CDCl<sub>3</sub>)  $\delta$  8.56 (d,  $J$  = 4.9 Hz, 1H), 8.42 – 8.39 (m, 1H), 7.41 – 7.37 (m, 3H), 7.35 (d,  $J$  = 8.3 Hz, 2H), 7.27 (d,  $J$  = 8.3 Hz, 2H), 7.09 (d,  $J$  = 4.9 Hz, 1H), 2.81 (s, 2H), 2.55 (s, 3H), 1.22 (s, 6H); **<sup>13</sup>C NMR** (151 MHz, CDCl<sub>3</sub>)  $\delta$  152.9, 148.4, 147.1, 146.2, 138.7, 135.6, 133.6, 129.6, 129.2, 128.0, 126.7, 126.3, 125.9, 123.7, 123.2, 40.2, 33.8, 28.1, 15.6; **HRMS** (ESI)  $m/z$ : [M + H]<sup>+</sup> calcd. for C<sub>22</sub>H<sub>22</sub>NS 332.1467; Found 332.1467.

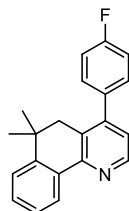

**4-(4-fluorophenyl)-6,6-dimethyl-5,6-dihydrobenzo[h]quinoline (34):**

According to the general procedure, a mixture consisting of oxime (0.6 mmol, 177.2 mg), enal (0.2 mmol, 30.0 mg), Fe(acac)<sub>3</sub> (0.02 mmol, 5.0 mg), pyrrolidine·HClO<sub>4</sub> (0.04 mmol, 6.8 mg) and 1,4-dioxane (2 mL) under a N<sub>2</sub> atmosphere was stirred at 120 °C for 12 h to afford **34**. White solid (26.4 mg, 43% yield);  $R_f$  = 0.6 (Petroleum ether/Ethyl acetate = 10:1); Mp = 129–130 °C; **<sup>1</sup>H NMR** (600 MHz, CDCl<sub>3</sub>)  $\delta$  8.56 (d,  $J$  = 4.8 Hz, 1H), 8.44 – 8.38 (m, 1H), 7.40 – 7.35 (m, 3H), 7.33 – 7.28 (m, 2H), 7.17 (t,  $J$  = 8.2 Hz, 2H), 7.08 (d,  $J$  = 4.6 Hz, 1H), 2.77 (s, 2H), 1.22 (s, 6H); **<sup>13</sup>C NMR** (151 MHz, CDCl<sub>3</sub>)  $\delta$  162.6 (d,  $^1J_{C-F}$  = 247.9 Hz), 152.9, 148.0, 147.1, 146.2, 134.9, 133.5, 130.4 (d,  $^3J_{C-F}$  = 8.2 Hz), 129.7, 128.1, 126.8, 125.9, 123.7, 123.2, 115.5 (d,  $^2J_{C-F}$  = 21.6 Hz), 40.2, 33.8, 28.1; **<sup>19</sup>F NMR** (565 MHz, CDCl<sub>3</sub>)  $\delta$  -113.95; **HRMS** (ESI)  $m/z$ : [M + H]<sup>+</sup> calcd. for C<sub>21</sub>H<sub>19</sub>FN 304.1496; Found 304.1495.

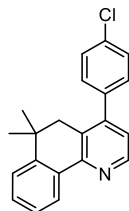

**4-(4-chlorophenyl)-6,6-dimethyl-5,6-dihydrobenzo[h]quinoline (35):**

According to the general procedure, a mixture consisting of oxime (0.6 mmol, 177.2 mg), enal (0.2 mmol, 33.3 mg), Fe(acac)<sub>3</sub> (0.02 mmol, 5.0 mg), pyrrolidine·HClO<sub>4</sub> (0.04 mmol, 6.8 mg) and 1,4-dioxane (2 mL) under a N<sub>2</sub> atmosphere was stirred at 120 °C for 12 h to afford **35**. White solid (39.0 mg, 60% yield);  $R_f$  = 0.6 (Petroleum ether/Ethyl acetate = 10:1); Mp = 137–139 °C; **<sup>1</sup>H NMR** (600 MHz, CDCl<sub>3</sub>)  $\delta$  8.57 (d,  $J$  = 4.8 Hz, 1H), 8.43 – 8.39 (m, 1H), 7.46 (d,  $J$  = 8.2 Hz, 2H), 7.41 – 7.35 (m, 3H), 7.27 (d,  $J$  = 8.3 Hz, 2H), 7.07 (d,  $J$  = 4.8 Hz, 1H), 2.77 (s, 2H), 1.22 (s, 6H); **<sup>13</sup>C NMR** (151 MHz, CDCl<sub>3</sub>)  $\delta$  153.0, 147.8, 147.2, 146.2, 137.4, 134.2, 133.4, 130.1, 129.8, 128.7, 127.9, 126.8, 125.9, 123.7, 123.0, 40.1, 33.8, 28.1; **HRMS** (ESI)  $m/z$ : [M + H]<sup>+</sup> calcd. for C<sub>21</sub>H<sub>19</sub>ClN 320.1201; Found 320.1200.

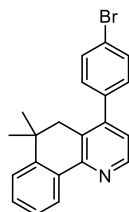

**4-(4-bromophenyl)-6,6-dimethyl-5,6-dihydrobenzo[h]quinoline (36):**

According to the general procedure, a mixture consisting of oxime (0.6 mmol, 177.2 mg), enal (0.2 mmol, 42.2 mg), Fe(acac)<sub>2</sub> (0.02 mmol, 5.0 mg), pyrrolidine·HClO<sub>4</sub> (0.04 mmol, 6.8 mg) and 1,4-dioxane (2 mL) under a N<sub>2</sub> atmosphere was stirred at 120 °C for 12 h to afford **36**. White solid (49.7 mg, 68% yield); R<sub>f</sub> = 0.6 (Petroleum ether/Ethyl acetate = 10:1); Mp = 132–133 °C; <sup>1</sup>H NMR (600 MHz, CDCl<sub>3</sub>) δ 8.57 (d, *J* = 4.9 Hz, 1H), 8.43–8.39 (m, 1H), 7.61 (d, *J* = 8.2 Hz, 2H), 7.41 – 7.35 (m, 3H), 7.21 (d, *J* = 8.2 Hz, 2H), 7.07 (d, *J* = 4.9 Hz, 1H), 2.77 (s, 2H), 1.21 (s, 6H); <sup>13</sup>C NMR (151 MHz, CDCl<sub>3</sub>) δ 153.0, 147.9, 147.2, 146.2, 137.8, 133.4, 131.7, 130.4, 129.8, 127.9, 126.8, 126.0, 123.8, 123.0, 122.3, 40.2, 33.9, 28.2; HRMS (ESI) *m/z*: [M + H]<sup>+</sup> calcd. for C<sub>21</sub>H<sub>19</sub>BrN 364.0695; Found 364.0695.

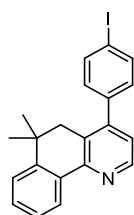**4-(4-iodophenyl)-6,6-dimethyl-5,6-dihydrobenzo[h]quinoline (37):**

According to the general procedure, a mixture consisting of oxime (0.6 mmol, 177.2 mg), enal (0.2 mmol, 51.6 mg), Fe(acac)<sub>2</sub> (0.02 mmol, 5.0 mg), pyrrolidine·HClO<sub>4</sub> (0.04 mmol, 6.8 mg) and 1,4-dioxane (2 mL) under a N<sub>2</sub> atmosphere was stirred at 120 °C for 12 h to afford **37**. White solid (49.5 mg, 60% yield); R<sub>f</sub> = 0.6 (Petroleum ether/Ethyl acetate = 10:1); Mp = 67–69 °C; <sup>1</sup>H NMR (600 MHz, CDCl<sub>3</sub>) δ 8.56 (d, *J* = 4.9 Hz, 1H), 8.42 – 8.39 (m, 1H), 7.81 (d, *J* = 8.3 Hz, 2H), 7.39 – 7.35 (m, 3H), 7.08 (d, *J* = 8.3 Hz, 2H), 7.06 (d, *J* = 5.0 Hz, 1H), 2.76 (s, 2H), 1.21 (s, 6H); <sup>13</sup>C NMR (151 MHz, CDCl<sub>3</sub>) δ 153.0, 147.9, 147.2, 146.2, 138.5, 137.7, 133.4, 130.6, 129.8, 127.8, 126.8, 126.0, 123.7, 122.9, 93.9, 40.1, 33.8, 28.2; HRMS (ESI) *m/z*: [M + H]<sup>+</sup> calcd. for C<sub>21</sub>H<sub>19</sub>IN 412.0557; Found 412.0555.

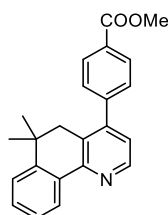**methyl 4-(6,6-dimethyl-5,6-dihydrobenzo[h]quinolin-4-yl)benzoate (38):**

According to the general procedure, a mixture consisting of oxime (0.6 mmol, 177.2 mg), enal (0.2 mmol, 38.0 mg), Fe(acac)<sub>2</sub> (0.02 mmol, 5.0 mg), pyrrolidine·HClO<sub>4</sub> (0.04 mmol, 6.8 mg) and 1,4-dioxane (2 mL) under a N<sub>2</sub> atmosphere was stirred at 120 °C for 12 h to afford **38**. White solid (47.0 mg, 68% yield); R<sub>f</sub> = 0.45 (Petroleum ether/Ethyl acetate = 10:1); Mp = 146–148 °C; <sup>1</sup>H NMR (600 MHz, CDCl<sub>3</sub>) δ 8.59 (d, *J* = 4.9 Hz, 1H), 8.44–8.40 (m, 1H), 8.15 (d, *J* = 8.2 Hz, 2H), 7.42 (d, *J* = 8.1 Hz, 2H), 7.40 – 7.35 (m, 3H), 7.10 (d, *J* = 4.9 Hz, 1H), 3.97 (s, 3H), 2.76 (s, 2H), 1.21 (s, 6H); <sup>13</sup>C NMR (151 MHz, CDCl<sub>3</sub>) δ 166.7, 153.0, 148.0, 147.2, 146.2, 143.6, 133.3, 129.9, 129.8, 129.8, 128.8, 127.8, 126.8, 126.0, 123.7, 122.8, 52.2, 40.1, 33.8, 28.1; HRMS (ESI) *m/z*: [M + H]<sup>+</sup> calcd. for C<sub>23</sub>H<sub>22</sub>NO<sub>2</sub> 344.1645; Found 344.1641.

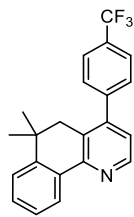

**6,6-dimethyl-4-(4-(trifluoromethyl)phenyl)-5,6-dihydrobenzo[h]quinoline (39):**

According to the general procedure, a mixture consisting of oxime (0.6 mmol, 177.2 mg), enal (0.2 mmol, 40.0 mg), Fe(acac)<sub>2</sub> (0.02 mmol, 5.0 mg), pyrrolidine·HClO<sub>4</sub> (0.04 mmol, 6.8 mg) and 1,4-dioxane (2 mL) under a N<sub>2</sub> atmosphere was stirred at 120 °C for 12 h to afford **39**. White solid (45.2 mg, 64% yield); R<sub>f</sub> = 0.6 (Petroleum ether/Ethyl acetate = 10:1); Mp = 150–152 °C; <sup>1</sup>H NMR (600 MHz, CDCl<sub>3</sub>) δ 8.60 (d, *J* = 4.9 Hz, 1H), 8.42 (d, *J* = 7.7 Hz, 1H), 7.75 (d, *J* = 8.0 Hz, 2H), 7.46 (d, *J* = 7.9 Hz, 2H), 7.42 – 7.36 (m, 3H), 7.09 (d, *J* = 4.9 Hz, 1H), 2.76 (s, 2H), 1.22 (s, 6H); <sup>13</sup>C NMR (151 MHz, CDCl<sub>3</sub>) δ 153.09, 147.59, 147.26, 146.14, 142.62, 133.27, 130.3 (q, <sup>2</sup>J<sub>C-F</sub> = 32.6 Hz), 129.89, 129.14, 127.85, 126.83, 125.98, 125.5 (q, <sup>3</sup>J<sub>C-F</sub> = 3.8 Hz), 124.1 (q, <sup>1</sup>J<sub>C-F</sub> = 272.2 Hz), 123.74, 122.88, 40.11, 33.82, 28.13; <sup>19</sup>F NMR (565 MHz, CDCl<sub>3</sub>) δ -62.57; HRMS (ESI) *m/z*: [M + H]<sup>+</sup> calcd. for C<sub>22</sub>H<sub>19</sub>F<sub>3</sub>N 354.1464; Found 354.1459.

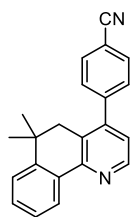

**4-(6,6-dimethyl-5,6-dihydrobenzo[h]quinolin-4-yl)benzonitrile (40):**

According to the general procedure, a mixture consisting of oxime (0.6 mmol, 177.2 mg), enal (0.2 mmol, 31.4 mg), Fe(acac)<sub>2</sub> (0.02 mmol, 5.0 mg), pyrrolidine·HClO<sub>4</sub> (0.04 mmol, 6.8 mg) and 1,4-dioxane (2 mL) under a N<sub>2</sub> atmosphere was stirred at 120 °C for 12 h to afford **40**. White solid (38.0 mg, 61% yield); R<sub>f</sub> = 0.3 (Petroleum ether/Ethyl acetate = 10:1); Mp = 183–184 °C; <sup>1</sup>H NMR (600 MHz, CDCl<sub>3</sub>) δ 8.60 (d, *J* = 4.9 Hz, 1H), 8.43–8.40 (m, 1H), 7.78 (d, *J* = 8.1 Hz, 2H), 7.45 (d, *J* = 8.1 Hz, 2H), 7.42 – 7.35 (m, 3H), 7.07 (d, *J* = 4.9 Hz, 1H), 2.73 (s, 2H), 1.22 (s, 6H); <sup>13</sup>C NMR (151 MHz, CDCl<sub>3</sub>) δ 153.2, 147.4, 147.0, 146.1, 143.7, 133.1, 132.3, 130.0, 129.6, 127.6, 126.9, 126.0, 123.8, 122.6, 118.4, 112.6, 40.1, 33.8, 28.2; HRMS (ESI) *m/z*: [M + H]<sup>+</sup> calcd. for C<sub>22</sub>H<sub>19</sub>N<sub>2</sub> 311.1543; Found 311.1542.

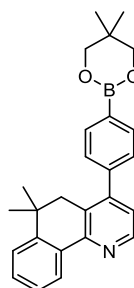

**4-(4-(5,5-dimethyl-1,3,2-dioxaborinan-2-yl)phenyl)-6,6-dimethyl-5,6-dihydrobenzo[h]quinoline (41):**

According to the general procedure, a mixture consisting of oxime (0.6 mmol, 177.2 mg), enal

(0.2 mmol, 48.8 mg), Fe(acac)<sub>2</sub> (0.02 mmol, 5.0 mg), pyrrolidine·HClO<sub>4</sub> (0.04 mmol, 6.8 mg) and 1,4-dioxane (2 mL) under a N<sub>2</sub> atmosphere was stirred at 120 °C for 12 h to afford **41**. White solid (47.7 mg, 60% yield); R<sub>f</sub> = 0.2 (Petroleum ether/Ethyl acetate = 10:1); Mp = 137–138 °C; <sup>1</sup>H NMR (600 MHz, CDCl<sub>3</sub>) δ 8.56 (d, *J* = 4.9 Hz, 1H), 8.43–8.39 (m, 1H), 7.91 (d, *J* = 7.9 Hz, 2H), 7.39–7.35 (m, 3H), 7.33 (d, *J* = 8.0 Hz, 2H), 7.12 (d, *J* = 4.9 Hz, 1H), 3.81 (s, 4H), 2.80 (s, 2H), 1.20 (s, 6H), 1.05 (s, 6H); <sup>13</sup>C NMR (151 MHz, CDCl<sub>3</sub>) δ 152.8, 149.2, 147.0, 146.3, 141.1, 133.9, 133.6, 129.6, 128.1, 128.0, 126.7, 125.9, 123.7, 123.2, 72.4, 40.1, 33.8, 31.9, 28.1, 21.9; HRMS (ESI) *m/z*: [M + H]<sup>+</sup> calcd. for C<sub>26</sub>H<sub>29</sub>BNO<sub>2</sub> 398.2286; Found 398.2289.

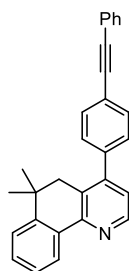

**6,6-dimethyl-4-(4-(phenylethynyl)phenyl)-5,6-dihydrobenzo[h]quinoline (42):**

According to the general procedure, a mixture consisting of oxime (0.6 mmol, 177.2 mg), enal (0.2 mmol, 46.4 mg), Fe(acac)<sub>2</sub> (0.02 mmol, 5.0 mg), pyrrolidine·HClO<sub>4</sub> (0.04 mmol, 6.8 mg) and 1,4-dioxane (2 mL) under a N<sub>2</sub> atmosphere was stirred at 120 °C for 12 h to afford **42**. White solid (41.8 mg, 54% yield); R<sub>f</sub> = 0.6 (Petroleum ether/Ethyl acetate = 10:1); Mp = 165–166 °C; <sup>1</sup>H NMR (600 MHz, CDCl<sub>3</sub>) δ 8.58 (d, *J* = 4.8 Hz, 1H), 8.45 – 8.40 (m, 1H), 7.64 (d, *J* = 7.9 Hz, 2H), 7.59 – 7.53 (m, 2H), 7.42 – 7.34 (m, 6H), 7.33 (d, *J* = 8.0 Hz, 2H), 7.11 (d, *J* = 4.9 Hz, 1H), 2.80 (s, 2H), 1.22 (s, 6H); <sup>13</sup>C NMR (151 MHz, CDCl<sub>3</sub>) δ 153.0, 148.4, 147.2, 146.2, 138.8, 133.5, 131.7, 129.7, 128.8, 128.5, 128.4, 127.9, 126.8, 125.9, 123.7, 123.2, 123.0, 90.4, 88.9, 40.2, 33.9, 28.2; HRMS (ESI) *m/z*: [M + H]<sup>+</sup> calcd. for C<sub>29</sub>H<sub>24</sub>N 386.1903; Found 386.1902.

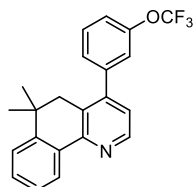

**6,6-dimethyl-4-(3-(trifluoromethoxy)phenyl)-5,6-dihydrobenzo[h]quinoline (43):**

According to the general procedure, a mixture consisting of oxime (0.6 mmol, 177.2 mg), enal (0.2 mmol, 43.2 mg), Fe(acac)<sub>2</sub> (0.02 mmol, 5.0 mg), pyrrolidine·HClO<sub>4</sub> (0.04 mmol, 6.8 mg) and 1,4-dioxane (2 mL) under a N<sub>2</sub> atmosphere was stirred at 120 °C for 12 h to afford **43**. White solid (35.5 mg, 48% yield); R<sub>f</sub> = 0.5 (Petroleum ether/Ethyl acetate = 10:1); Mp = 55–57 °C; <sup>1</sup>H NMR (600 MHz, CDCl<sub>3</sub>) δ 8.59 (d, *J* = 4.9 Hz, 1H), 8.44 – 8.40 (m, 1H), 7.51 (t, *J* = 7.9 Hz, 1H), 7.42 – 7.35 (m, 3H), 7.28 (t, *J* = 9.5 Hz, 2H), 7.21 (s, 1H), 7.09 (d, *J* = 4.9 Hz, 1H), 2.77 (s, 2H), 1.23 (s, 6H); <sup>13</sup>C NMR (151 MHz, CDCl<sub>3</sub>) δ 153.1, 149.3, 147.4, 147.3, 146.2, 141.0, 133.3, 130.0, 129.8, 127.9, 127.1, 126.8, 126.0, 123.7, 122.9, 121.3, 120.5 (q, <sup>1</sup>J<sub>C-F</sub> = 257.7 Hz), 120.3, 40.0, 33.8, 28.1; <sup>19</sup>F NMR (565 MHz, CDCl<sub>3</sub>) δ -57.79; HRMS (ESI) *m/z*: [M + H]<sup>+</sup> calcd. for C<sub>22</sub>H<sub>19</sub>F<sub>3</sub>NO 370.1413; Found 370.1411.

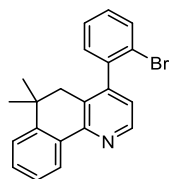

#### 4-(2-bromophenyl)-6,6-dimethyl-5,6-dihydrobenzo[h]quinoline (44):

According to the general procedure, a mixture consisting of oxime (0.6 mmol, 177.2 mg), enal (0.2 mmol, 42.2 mg), Fe(acac)<sub>2</sub> (0.02 mmol, 5.0 mg), pyrrolidine·HClO<sub>4</sub> (0.04 mmol, 6.8 mg) and 1,4-dioxane (2 mL) under a N<sub>2</sub> atmosphere was stirred at 120 °C for 12 h to afford **44**. White solid (40.8 mg, 56% yield); R<sub>f</sub> = 0.6 (Petroleum ether/Ethyl acetate = 10:1); Mp = 144–145 °C; <sup>1</sup>H NMR (600 MHz, CDCl<sub>3</sub>) δ 8.59 (d, *J* = 4.9 Hz, 1H), 8.46 – 8.41 (m, 1H), 7.70 (d, *J* = 8.0 Hz, 1H), 7.43 – 7.35 (m, 4H), 7.32 – 7.27 (m, 1H), 7.18 (dd, *J* = 7.5, 1.3 Hz, 1H), 7.01 (d, *J* = 4.9 Hz, 1H), 2.61 (d, *J* = 15.7 Hz, 1H), 2.50 (d, *J* = 15.7 Hz, 1H), 1.25 (s, 3H), 1.20 (s, 3H); <sup>13</sup>C NMR (151 MHz, CDCl<sub>3</sub>) δ 152.7, 148.4, 147.0, 146.3, 139.9, 133.3, 132.9, 130.2, 129.7, 129.5, 128.8, 127.4, 126.7, 125.8, 123.8, 123.1, 122.7, 39.8, 33.7, 28.5, 28.2; HRMS (ESI) *m/z*: [M + H]<sup>+</sup> calcd. for C<sub>21</sub>H<sub>19</sub>BrN 364.0695; Found 364.0693.

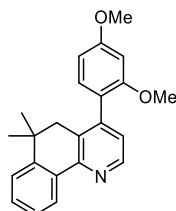

#### 4-(2,4-dimethoxyphenyl)-6,6-dimethyl-5,6-dihydrobenzo[h]quinoline (45):

According to the general procedure, a mixture consisting of oxime (0.6 mmol, 177.2 mg), enal (0.2 mmol, 38.4 mg), Fe(acac)<sub>2</sub> (0.02 mmol, 5.0 mg), pyrrolidine·HClO<sub>4</sub> (0.04 mmol, 6.8 mg) and 1,4-dioxane (2 mL) under a N<sub>2</sub> atmosphere was stirred at 120 °C for 12 h to afford **45**. White solid (48.0 mg, 69% yield); R<sub>f</sub> = 0.4 (Petroleum ether/Ethyl acetate = 10:1); Mp = 107–109 °C; <sup>1</sup>H NMR (600 MHz, CDCl<sub>3</sub>) δ 8.53 (d, *J* = 4.9 Hz, 1H), 8.42 – 8.39 (m, 1H), 7.38 – 7.34 (m, 3H), 7.08 (d, *J* = 8.2 Hz, 1H), 7.04 (d, *J* = 4.9 Hz, 1H), 6.59 (dd, *J* = 8.2, 2.3 Hz, 1H), 6.57 (d, *J* = 2.2 Hz, 1H), 3.88 (s, 3H), 3.73 (s, 3H), 2.71 (d, *J* = 15.5 Hz, 1H), 2.53 (d, *J* = 15.5 Hz, 1H), 1.26 (s, 3H), 1.14 (s, 3H); <sup>13</sup>C NMR (151 MHz, CDCl<sub>3</sub>) δ 161.1, 157.5, 152.1, 146.8, 146.4, 146.3, 133.8, 130.9, 130.1, 129.4, 126.6, 125.8, 124.3, 123.7, 120.8, 104.6, 98.8, 55.4, 55.4, 40.0, 33.7, 28.3; HRMS (ESI) *m/z*: [M + H]<sup>+</sup> calcd. for C<sub>23</sub>H<sub>24</sub>NO<sub>2</sub> 346.1802; Found 346.1800.

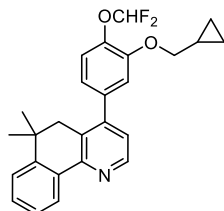

#### 4-(3-(cyclopropylmethoxy)-4-(difluoromethoxy)phenyl)-6,6-dimethyl-5,6-dihydrobenzo[h]quinoline (46):

According to the general procedure, a mixture consisting of oxime (0.6 mmol, 177.2 mg), enal (0.2 mmol, 53.6 mg), Fe(acac)<sub>2</sub> (0.02 mmol, 5.0 mg), pyrrolidine·HClO<sub>4</sub> (0.04 mmol, 6.8 mg) and

1,4-dioxane (2 mL) under a N<sub>2</sub> atmosphere was stirred at 120 °C for 12 h to afford **46**. White solid (46.1 mg, 54% yield); R<sub>f</sub> = 0.5 (Petroleum ether/Ethyl acetate = 10:1); Mp = 104–105 °C; **<sup>1</sup>H NMR** (600 MHz, CDCl<sub>3</sub>) δ 8.56 (d, *J* = 4.9 Hz, 1H), 8.43 – 8.38 (m, 1H), 7.41 – 7.35 (m, 3H), 7.25 (d, *J* = 7.8 Hz, 1H), 7.08 (d, *J* = 4.9 Hz, 1H), 6.90 (s, 1H), 6.89 – 6.86 (m, 1H), 6.71 (t, *J* = 75.4 Hz, 1H), 3.90 (d, *J* = 6.8 Hz, 2H), 2.78 (s, 2H), 1.34 – 1.27 (m, 1H), 1.23 (s, 6H), 0.66 (q, *J* = 5.7 Hz, 2H), 0.37 (q, *J* = 5.0 Hz, 2H); **<sup>13</sup>C NMR** (151 MHz, CDCl<sub>3</sub>) δ 153.0, 150.5, 148.2, 147.2, 146.2, 140.3, 137.5, 133.5, 129.8, 128.0, 126.8, 126.0, 123.8, 123.1, 122.7, 121.6, 116.3 (t, <sup>1</sup>*J*<sub>C-F</sub> = 260.2 Hz), 115.3, 74.2, 40.2, 33.9, 28.2, 10.2, 3.2; **<sup>19</sup>F NMR** (565 MHz, CDCl<sub>3</sub>) δ -81.53; **HRMS** (ESI) *m/z*: [M + H]<sup>+</sup> calcd. for C<sub>26</sub>H<sub>26</sub>F<sub>2</sub>NO<sub>2</sub> 422.1926; Found 422.1924.

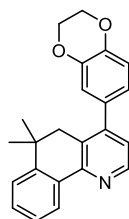

**4-(2,3-dihydrobenzo[b][1,4]dioxin-6-yl)-6,6-dimethyl-5,6-dihydrobenzo[h]quinoline (47):**

According to the general procedure, a mixture consisting of oxime (0.6 mmol, 177.2 mg), enal (0.2 mmol, 38.0 mg), Fe(acac)<sub>3</sub> (0.02 mmol, 5.0 mg), pyrrolidine·HClO<sub>4</sub> (0.04 mmol, 6.8 mg) and 1,4-dioxane (2 mL) under a N<sub>2</sub> atmosphere was stirred at 120 °C for 12 h to afford **47**. White solid (48.5 mg, 70% yield); R<sub>f</sub> = 0.4 (Petroleum ether/Ethyl acetate = 10:1); Mp = 144–146 °C; **<sup>1</sup>H NMR** (600 MHz, CDCl<sub>3</sub>) δ 8.53 (d, *J* = 4.9 Hz, 1H), 8.42 – 8.37 (m, 1H), 7.39 – 7.34 (m, 3H), 7.08 (d, *J* = 4.9 Hz, 1H), 6.96 (d, *J* = 8.2 Hz, 1H), 6.86 (d, *J* = 2.0 Hz, 1H), 6.81 (dd, *J* = 8.2, 2.1 Hz, 1H), 4.32 (s, 4H), 2.84 (s, 2H), 1.22 (s, 6H); **<sup>13</sup>C NMR** (151 MHz, CDCl<sub>3</sub>) δ 152.8, 148.5, 147.0, 146.3, 143.5, 143.4, 133.7, 132.2, 129.6, 128.1, 126.7, 125.9, 123.6, 123.3, 122.0, 117.7, 117.3, 64.5, 64.4, 40.2, 33.9, 28.1; **HRMS** (ESI) *m/z*: [M + H]<sup>+</sup> calcd. for C<sub>23</sub>H<sub>22</sub>NO<sub>2</sub> 344.1645; Found 344.1645.

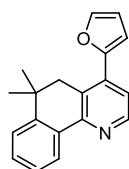

**4-(furan-2-yl)-6,6-dimethyl-5,6-dihydrobenzo[h]quinoline (48):**

According to the general procedure, a mixture consisting of oxime (0.6 mmol, 177.2 mg), enal (0.2 mmol, 24.4 mg), Fe(acac)<sub>3</sub> (0.02 mmol, 5.0 mg), pyrrolidine·HClO<sub>4</sub> (0.04 mmol, 6.8 mg) and 1,4-dioxane (2 mL) under a N<sub>2</sub> atmosphere was stirred at 120 °C for 12 h to afford **48**. Yellow oil (28.8 mg, 52% yield); R<sub>f</sub> = 0.55 (Petroleum ether/Ethyl acetate = 10:1); **<sup>1</sup>H NMR** (400 MHz, CDCl<sub>3</sub>) δ 8.56 (d, *J* = 5.1 Hz, 1H), 8.39 – 8.33 (m, 1H), 7.62–7.58 (m, 1H), 7.46 (d, *J* = 5.1 Hz, 1H), 7.42 – 7.33 (m, 3H), 6.70 (d, *J* = 3.3 Hz, 1H), 6.59–6.55 (m, 1H), 3.07 (s, 2H), 1.29 (s, 6H); **<sup>13</sup>C NMR** (101 MHz, CDCl<sub>3</sub>) δ 153.2, 151.0, 147.2, 145.9, 143.3, 136.9, 133.4, 129.7, 126.7, 126.4, 126.0, 123.6, 120.0, 111.7, 111.6, 40.4, 33.6, 28.6; **HRMS** (ESI) *m/z*: [M + H]<sup>+</sup> calcd. for C<sub>19</sub>H<sub>18</sub>NO 276.1383; Found 276.1382.

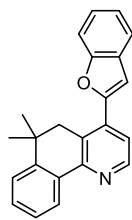

**4-(benzofuran-2-yl)-6,6-dimethyl-5,6-dihydrobenzo[h]quinoline (49):**

According to the general procedure, a mixture consisting of oxime (0.6 mmol, 177.2 mg), enal (0.2 mmol, 34.4 mg), Fe(acac)<sub>2</sub> (0.02 mmol, 5.0 mg), pyrrolidine·HClO<sub>4</sub> (0.04 mmol, 6.8 mg) and 1,4-dioxane (2 mL) under a N<sub>2</sub> atmosphere was stirred at 120 °C for 12 h to afford **49**. White solid (28.7 mg, 44% yield); R<sub>f</sub> = 0.55 (Petroleum ether/Ethyl acetate = 10:1); Mp = 153–154 °C; <sup>1</sup>H NMR (600 MHz, CDCl<sub>3</sub>) δ 8.64 (d, *J* = 5.0 Hz, 1H), 8.40 (d, *J* = 7.4 Hz, 1H), 7.67 (d, *J* = 7.7 Hz, 1H), 7.61 (d, *J* = 5.0 Hz, 1H), 7.59 (d, *J* = 8.3 Hz, 1H), 7.44 – 7.35 (m, 4H), 7.30 (t, *J* = 7.4 Hz, 1H), 7.03 (s, 1H), 3.16 (s, 2H), 1.30 (s, 6H); <sup>13</sup>C NMR (151 MHz, CDCl<sub>3</sub>) δ 155.0, 153.4, 152.9, 147.5, 146.0, 137.0, 133.4, 129.8, 128.7, 127.6, 126.8, 126.1, 125.4, 123.7, 123.3, 121.5, 120.9, 111.5, 108.0, 40.6, 33.8, 28.6; HRMS (ESI) *m/z*: [M + H]<sup>+</sup> calcd. for C<sub>23</sub>H<sub>20</sub>NO 326.1539; Found 326.1538.

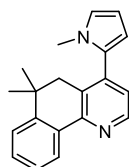

**6,6-dimethyl-4-(1-methyl-1H-pyrrol-2-yl)-5,6-dihydrobenzo[h]quinoline (50):**

According to the general procedure, a mixture consisting of oxime (0.6 mmol, 177.2 mg), enal (0.2 mmol, 27.0 mg), Fe(acac)<sub>2</sub> (0.02 mmol, 5.0 mg), pyrrolidine·HClO<sub>4</sub> (0.04 mmol, 6.8 mg) and 1,4-dioxane (2 mL) under a N<sub>2</sub> atmosphere was stirred at 120 °C for 12 h to afford **50**. Yellow oil (27.7 mg, 48% yield); R<sub>f</sub> = 0.5 (Petroleum ether/Ethyl acetate = 10:1); <sup>1</sup>H NMR (600 MHz, CDCl<sub>3</sub>) δ 8.55 (d, *J* = 4.7 Hz, 1H), 8.43–8.38 (m, 1H), 7.39 – 7.34 (m, 3H), 7.09 (d, *J* = 4.7 Hz, 1H), 6.78–6.75 (m, 1H), 6.27–6.23 (m, 1H), 6.16–6.12 (m, 1H), 3.48 (s, 3H), 2.76 (s, 2H), 1.22 (s, 6H); <sup>13</sup>C NMR (151 MHz, CDCl<sub>3</sub>) δ 153.0, 146.9, 146.4, 140.7, 133.5, 130.4, 130.1, 129.7, 126.8, 125.9, 124.3, 123.8, 123.3, 110.1, 108.0, 40.2, 34.5, 33.8, 28.2; HRMS (ESI) *m/z*: [M + H]<sup>+</sup> calcd. for C<sub>20</sub>H<sub>21</sub>N<sub>2</sub> 289.1699; Found 289.1695.

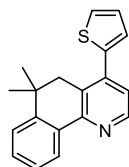

**6,6-dimethyl-4-(thiophen-2-yl)-5,6-dihydrobenzo[h]quinoline (51):**

According to the general procedure, a mixture consisting of oxime (0.6 mmol, 177.2 mg), enal (0.2 mmol, 27.6 mg), Fe(acac)<sub>2</sub> (0.02 mmol, 5.0 mg), pyrrolidine·HClO<sub>4</sub> (0.04 mmol, 6.8 mg) and 1,4-dioxane (2 mL) under a N<sub>2</sub> atmosphere was stirred at 120 °C for 12 h to afford **51**. Yellow oil (36.8 mg, 63% yield); R<sub>f</sub> = 0.5 (Petroleum ether/Ethyl acetate = 10:1); <sup>1</sup>H NMR (600 MHz, CDCl<sub>3</sub>) δ 8.54 (d, *J* = 4.9 Hz, 1H), 8.39 (d, *J* = 6.8 Hz, 1H), 7.44 (d, *J* = 4.6 Hz, 1H), 7.41 – 7.34 (m, 3H), 7.24 (d, *J* = 4.9 Hz, 1H), 7.17 – 7.13 (m, 2H), 3.00 (s, 2H), 1.25 (s, 6H); <sup>13</sup>C NMR (151



MHz, CDCl<sub>3</sub>)  $\delta$  153.2, 147.1, 146.2, 141.6, 139.9, 133.5, 129.7, 128.3, 127.8, 127.5, 126.7, 126.7, 126.0, 123.7, 123.5, 40.3, 33.8, 28.3; **HRMS** (ESI)  $m/z$ : [M + H]<sup>+</sup> calcd. for C<sub>19</sub>H<sub>18</sub>NS 292.1154; Found 292.1153.

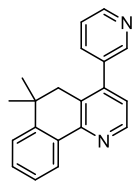

**6,6-dimethyl-4-(pyridin-3-yl)-5,6-dihydrobenzo[h]quinoline (52):**

According to the general procedure, a mixture consisting of oxime (0.6 mmol, 177.2 mg), enal (0.2 mmol, 26.6 mg), Fe(acac)<sub>2</sub> (0.02 mmol, 5.0 mg), pyrrolidine·HClO<sub>4</sub> (0.04 mmol, 6.8 mg) and 1,4-dioxane (2 mL) under a N<sub>2</sub> atmosphere was stirred at 120 °C for 12 h to afford **52**. Yellow oil (43.0 mg, 75% yield);  $R_f$  = 0.3 (Petroleum ether/Ethyl acetate = 10:1); **<sup>1</sup>H NMR** (600 MHz, CDCl<sub>3</sub>)  $\delta$  8.71-8.68 (m, 1H), 8.64 (s, 1H), 8.61 (d,  $J$  = 4.8 Hz, 1H), 8.44-8.40 (m, 1H), 7.68 (d,  $J$  = 7.7 Hz, 1H), 7.43 (dd,  $J$  = 7.3, 5.3 Hz, 1H), 7.41-7.36 (m, 3H), 7.11 (d,  $J$  = 4.8 Hz, 1H), 2.79 (s, 2H), 1.23 (s, 6H); **<sup>13</sup>C NMR** (151 MHz, CDCl<sub>3</sub>)  $\delta$  153.2, 149.5, 149.3, 147.4, 146.1, 145.3, 136.1, 134.6, 133.2, 129.9, 128.2, 126.8, 126.0, 123.7, 123.3, 123.1, 40.1, 33.8, 28.2; **HRMS** (ESI)  $m/z$ : [M + H]<sup>+</sup> calcd. for C<sub>20</sub>H<sub>19</sub>N<sub>2</sub> 287.1543; Found 287.1543.

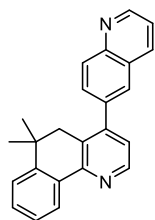

**6,6-dimethyl-4-(quinolin-6-yl)-5,6-dihydrobenzo[h]quinoline (53):**

According to the general procedure, a mixture consisting of oxime (0.6 mmol, 177.2 mg), enal (0.2 mmol, 36.6 mg), Fe(acac)<sub>2</sub> (0.02 mmol, 5.0 mg), pyrrolidine·HClO<sub>4</sub> (0.04 mmol, 6.8 mg) and 1,4-dioxane (2 mL) under a N<sub>2</sub> atmosphere was stirred at 120 °C for 12 h to afford **53**. White solid (54.0 mg, 80% yield);  $R_f$  = 0.4 (Petroleum ether/Ethyl acetate = 10:1);  $M_p$  = 148–149 °C; **<sup>1</sup>H NMR** (600 MHz, CDCl<sub>3</sub>)  $\delta$  9.00 (d,  $J$  = 4.0 Hz, 1H), 8.63 (d,  $J$  = 4.9 Hz, 1H), 8.46-8.43 (m, 1H), 8.24-8.21 (m, 2H), 7.80 (s, 1H), 7.70 (dd,  $J$  = 8.6, 1.5 Hz, 1H), 7.49 (dd,  $J$  = 8.2, 4.2 Hz, 1H), 7.42 – 7.38 (m, 3H), 7.21 (d,  $J$  = 4.9 Hz, 1H), 2.84 (s, 2H), 1.22 (s, 6H); **<sup>13</sup>C NMR** (151 MHz, CDCl<sub>3</sub>)  $\delta$  153.1, 151.0, 148.3, 147.8, 147.3, 146.2, 137.4, 136.2, 133.5, 130.4, 129.9, 129.7, 128.2, 128.2, 127.7, 126.9, 126.0, 123.8, 123.4, 121.8, 40.3, 33.9, 28.2; **HRMS** (ESI)  $m/z$ : [M + H]<sup>+</sup> calcd. for C<sub>24</sub>H<sub>21</sub>N<sub>2</sub> 337.1699; Found 337.1690.

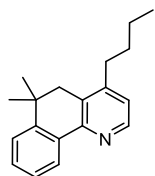

**4-butyl-6,6-dimethyl-5,6-dihydrobenzo[h]quinoline (54):**

According to the general procedure, a mixture consisting of oxime (0.6 mmol, 177.2 mg), enal (0.2 mmol, 22.4 mg), Fe(acac)<sub>2</sub> (0.02 mmol, 5.0 mg), pyrrolidine·HClO<sub>4</sub> (0.04 mmol, 6.8 mg) and 1,4-dioxane (2 mL) under a N<sub>2</sub> atmosphere was stirred at 120 °C for 12 h to afford **54**. Colorless

oil (18.3 mg, 34% yield);  $R_f$  = 0.6 (Petroleum ether/Ethyl acetate = 10:1);  **$^1\text{H}$  NMR** (600 MHz,  $\text{CDCl}_3$ )  $\delta$  8.42 (d,  $J$  = 4.9 Hz, 1H), 8.37 – 8.34 (m, 1H), 7.40 – 7.32 (m, 3H), 7.00 (d,  $J$  = 4.9 Hz, 1H), 2.81 (s, 2H), 2.65 (t,  $J$  = 7.8 Hz, 2H), 1.61 – 1.54 (m, 2H), 1.45 – 1.38 (m, 2H), 1.30 (s, 6H), 0.96 (t,  $J$  = 7.3 Hz, 3H);  **$^{13}\text{C}$  NMR** (151 MHz,  $\text{CDCl}_3$ )  $\delta$  152.0, 149.2, 147.0, 145.9, 133.7, 129.3, 128.9, 126.7, 125.8, 123.6, 123.2, 38.8, 33.7, 32.2, 32.0, 28.4, 22.5, 13.9; **HRMS** (ESI)  $m/z$ :  $[\text{M} + \text{H}]^+$  calcd. for  $\text{C}_{19}\text{H}_{24}\text{N}$  266.1903; Found 266.1900.

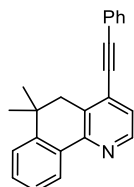

**6,6-dimethyl-4-(phenylethynyl)-5,6-dihydrobenzo[h]quinoline (55):**

According to the general procedure, a mixture consisting of oxime (0.6 mmol, 177.2 mg), enal (0.2 mmol, 31.2 mg),  $\text{Fe}(\text{acac})_2$  (0.02 mmol, 5.0 mg), pyrrolidine· $\text{HClO}_4$  (0.04 mmol, 6.8 mg) and 1,4-dioxane (2 mL) under a  $\text{N}_2$  atmosphere was stirred at 120 °C for 12 h to afford **55**. White solid (30.0 mg, 48% yield);  $R_f$  = 0.6 (Petroleum ether/Ethyl acetate = 10:1);  $\text{Mp}$  = 142–144 °C;  **$^1\text{H}$  NMR** (600 MHz,  $\text{CDCl}_3$ )  $\delta$  8.52 (d,  $J$  = 4.9 Hz, 1H), 8.37 (d,  $J$  = 7.4 Hz, 1H), 7.62 – 7.57 (m, 2H), 7.44 – 7.38 (m, 5H), 7.38 – 7.34 (m, 1H), 7.29 (d,  $J$  = 4.9 Hz, 1H), 3.09 (s, 2H), 1.34 (s, 6H);  **$^{13}\text{C}$  NMR** (151 MHz,  $\text{CDCl}_3$ )  $\delta$  152.6, 147.1, 146.4, 133.0, 131.9, 131.7, 130.7, 129.9, 129.1, 128.6, 126.8, 125.7, 124.5, 124.0, 122.6, 97.2, 85.7, 40.9, 33.8, 28.6; **HRMS** (ESI)  $m/z$ :  $[\text{M} + \text{H}]^+$  calcd. for  $\text{C}_{23}\text{H}_{20}\text{N}$  310.1590; Found 310.1585.

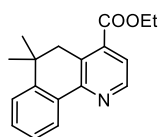

**ethyl 6,6-dimethyl-5,6-dihydrobenzo[h]quinoline-4-carboxylate (56):**

According to the general procedure, a mixture consisting of oxime (0.6 mmol, 177.2 mg), enal (0.2 mmol, 25.6 mg),  $\text{Fe}(\text{acac})_2$  (0.02 mmol, 5.0 mg), pyrrolidine· $\text{HClO}_4$  (0.04 mmol, 6.8 mg) and 1,4-dioxane (2 mL) under a  $\text{N}_2$  atmosphere was stirred at 120 °C for 12 h to afford **56**. Colorless oil (23.5 mg, 41% yield);  $R_f$  = 0.5 (Petroleum ether/Ethyl acetate = 10:1);  **$^1\text{H}$  NMR** (600 MHz,  $\text{CDCl}_3$ )  $\delta$  8.62 (d,  $J$  = 5.0 Hz, 1H), 8.36 (d,  $J$  = 7.5 Hz, 1H), 7.54 (d,  $J$  = 5.0 Hz, 1H), 7.42 – 7.39 (m, 2H), 7.38 – 7.35 (m, 1H), 4.42 (q,  $J$  = 7.1 Hz, 2H), 3.20 (s, 2H), 1.43 (t,  $J$  = 7.1 Hz, 3H), 1.29 (s, 6H);  **$^{13}\text{C}$  NMR** (151 MHz,  $\text{CDCl}_3$ )  $\delta$  166.6, 154.0, 147.4, 146.4, 137.6, 132.8, 130.5, 130.0, 126.7, 126.0, 123.8, 121.8, 61.5, 39.7, 33.4, 28.4, 14.2; **HRMS** (ESI)  $m/z$ :  $[\text{M} + \text{H}]^+$  calcd. for  $\text{C}_{18}\text{H}_{20}\text{NO}_2$  282.1489; Found 282.1487.

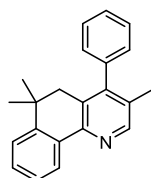

**3,6,6-trimethyl-4-phenyl-5,6-dihydrobenzo[h]quinoline (57):**

According to the general procedure, a mixture consisting of oxime (0.6 mmol, 177.2 mg), enal (0.2 mmol, 29.2 mg),  $\text{Fe}(\text{acac})_2$  (0.02 mmol, 5.0 mg), pyrrolidine· $\text{HClO}_4$  (0.04 mmol, 6.8 mg) and 1,4-dioxane (2 mL) under a  $\text{N}_2$  atmosphere was stirred at 120 °C for 12 h to afford **57**. White solid

(17.5 mg, 29% yield);  $R_f = 0.6$  (Petroleum ether/Ethyl acetate = 10:1);  $M_p = 110\text{--}112\text{ }^\circ\text{C}$ ;  $^1\text{H NMR}$  (600 MHz,  $\text{CDCl}_3$ )  $\delta$  8.45 (s, 1H), 8.41 – 8.37 (m, 1H), 7.48 (t,  $J = 7.4$  Hz, 2H), 7.41 (t,  $J = 7.4$  Hz, 1H), 7.38 – 7.33 (m, 3H), 7.14 (d,  $J = 7.2$  Hz, 2H), 2.51 (s, 2H), 2.06 (s, 3H), 1.19 (s, 6H);  $^{13}\text{C NMR}$  (151 MHz,  $\text{CDCl}_3$ )  $\delta$  150.3, 148.9, 148.2, 145.9, 138.0, 133.6, 130.0, 129.2, 128.7, 128.4, 128.2, 127.5, 126.7, 125.4, 123.7, 40.4, 33.8, 28.1, 17.5; **HRMS** (ESI)  $m/z$ :  $[\text{M} + \text{H}]^+$  calcd. for  $\text{C}_{22}\text{H}_{22}\text{N}$  300.1747; Found 300.1747.

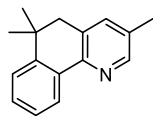

**3,6,6-trimethyl-5,6-dihydrobenzo[h]quinoline (58):**

According to the general procedure, a mixture consisting of oxime (0.6 mmol, 177.2 mg), enal (0.2 mmol, 14.1 mg),  $\text{Fe}(\text{acac})_2$  (0.02 mmol, 5.0 mg), pyrrolidine· $\text{HClO}_4$  (0.04 mmol, 6.8 mg) and 1,4-dioxane (2 mL) under a  $\text{N}_2$  atmosphere was stirred at  $120\text{ }^\circ\text{C}$  for 12 h to afford **58**. White solid (12.7 mg, 28% yield);  $R_f = 0.6$  (Petroleum ether/Ethyl acetate = 10:1);  $M_p = 66\text{--}68\text{ }^\circ\text{C}$ ;  $^1\text{H NMR}$  (600 MHz,  $\text{CDCl}_3$ )  $\delta$  8.36 (s, 1H), 8.34 – 8.31 (m, 1H), 7.40 – 7.36 (m, 1H), 7.36 – 7.31 (m, 2H), 7.28 (s, 1H), 2.79 (s, 2H), 2.34 (s, 3H), 1.28 (s, 6H);  $^{13}\text{C NMR}$  (151 MHz,  $\text{CDCl}_3$ )  $\delta$  149.8, 148.2, 146.0, 136.6, 133.3, 131.8, 130.1, 129.2, 126.7, 125.1, 123.9, 77.2, 77.0, 76.8, 43.1, 33.9, 28.3, 18.2; **HRMS** (ESI)  $m/z$ :  $[\text{M} + \text{H}]^+$  calcd. for  $\text{C}_{16}\text{H}_{18}\text{N}$  224.1434; Found 224.1435.

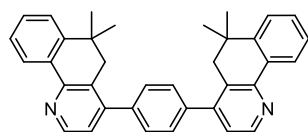

**1,4-bis(6,6-dimethyl-5,6-dihydrobenzo[h]quinolin-4-yl)benzene (59):**

According to the general procedure, a mixture consisting of oxime (1.2 mmol, 354.4 mg), enal (0.2 mmol, 37.2 mg),  $\text{Fe}(\text{acac})_2$  (0.04 mmol, 10.2 mg), pyrrolidine· $\text{HClO}_4$  (0.08 mmol, 13.7 mg) and 1,4-dioxane (4 mL) under a  $\text{N}_2$  atmosphere was stirred at  $120\text{ }^\circ\text{C}$  for 12 h to afford **59**. White solid (35.5 mg, 46% yield);  $R_f = 0.4$  (Petroleum ether/Ethyl acetate = 10:1);  $M_p = 284\text{--}285\text{ }^\circ\text{C}$ ;  $^1\text{H NMR}$  (600 MHz,  $\text{CDCl}_3$ )  $\delta$  8.61 (d,  $J = 4.8$  Hz, 2H), 8.46–8.42 (m, 2H), 7.46 (s, 4H), 7.42 – 7.37 (m, 6H), 7.19 (d,  $J = 4.8$  Hz, 2H), 2.90 (s, 4H), 1.28 (s, 12H);  $^{13}\text{C NMR}$  (151 MHz,  $\text{CDCl}_3$ )  $\delta$  153.0, 148.4, 147.2, 146.2, 138.6, 133.5, 129.8, 128.9, 128.0, 126.8, 126.0, 123.7, 123.3, 40.2, 33.9, 28.2; **HRMS** (ESI)  $m/z$ :  $[\text{M} + \text{H}]^+$  calcd. for  $\text{C}_{36}\text{H}_{33}\text{N}_2$  493.2638; Found 493.2637.

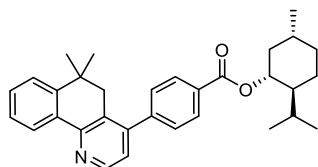

**(1R,2S,5R)-2-isopropyl-5-methylcyclohexyl 4-(6,6-dimethyl-5,6-dihydrobenzo[h]quinolin-4-yl)benzoate (60):**

According to the general procedure, a mixture consisting of oxime (0.6 mmol, 177.2 mg), enal (0.2 mmol, 62.8 mg),  $\text{Fe}(\text{acac})_2$  (0.02 mmol, 5.0 mg), pyrrolidine· $\text{HClO}_4$  (0.04 mmol, 6.8 mg) and 1,4-dioxane (2 mL) under a  $\text{N}_2$  atmosphere was stirred at  $120\text{ }^\circ\text{C}$  for 12 h to afford **60**. Colorless oil (43.4 mg, 46% yield);  $R_f = 0.5$  (Petroleum ether/Ethyl acetate = 10:1);  $^1\text{H NMR}$  (600 MHz,  $\text{CDCl}_3$ )  $\delta$  8.59 (d,  $J = 4.9$  Hz, 1H), 8.45 – 8.39 (m, 1H), 8.16 (d,  $J = 8.2$  Hz, 2H), 7.42 (d,  $J = 8.2$

Hz, 2H), 7.40 – 7.36 (m, 3H), 7.10 (d,  $J = 4.9$  Hz, 1H), 4.99 (td,  $J = 10.9, 4.3$  Hz, 1H), 2.78 (s, 2H), 2.19 – 2.14 (m, 1H), 2.06 – 1.97 (m, 1H), 1.79 – 1.72 (m, 2H), 1.63 – 1.55 (m, 2H), 1.22 (d,  $J = 3.2$  Hz, 6H), 1.18 – 1.10 (m, 2H), 0.95 (d,  $J = 6.8$  Hz, 7H), 0.84 (d,  $J = 6.9$  Hz, 3H);  $^{13}\text{C}$  NMR (151 MHz,  $\text{CDCl}_3$ )  $\delta$  165.8, 153.0, 148.1, 147.2, 146.2, 143.3, 133.3, 130.5, 129.8, 129.7, 128.8, 127.9, 126.8, 125.9, 123.8, 122.9, 75.1, 47.3, 41.0, 40.1, 34.3, 33.8, 31.5, 28.1, 26.6, 23.7, 22.1, 20.8, 16.6; **HRMS** (ESI)  $m/z$ :  $[\text{M} + \text{H}]^+$  calcd. for  $\text{C}_{32}\text{H}_{38}\text{NO}_2$  468.2897; Found 468.2893.

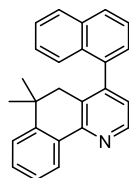

**6,6-dimethyl-4-(naphthalen-1-yl)-5,6-dihydrobenzo[h]quinoline (61):**

According to the general procedure, a mixture consisting of oxime (0.6 mmol, 177.2 mg), enal (0.2 mmol, 36.4 mg),  $\text{Fe}(\text{acac})_2$  (0.02 mmol, 5.0 mg), pyrrolidine· $\text{HClO}_4$  (0.04 mmol, 6.8 mg) and 1,4-dioxane (2 mL) under a  $\text{N}_2$  atmosphere was stirred at 120 °C for 12 h to afford **61**. Colorless oil (30.2 mg, 45% yield);  $R_f = 0.65$  (Petroleum ether/Ethyl acetate = 10:1);  $^1\text{H}$  NMR (600 MHz,  $\text{CDCl}_3$ )  $\delta$  8.63 (d,  $J = 4.8$  Hz, 1H), 8.50–8.47 (m, 1H), 7.94 (d,  $J = 3.4$  Hz, 1H), 7.93 (d,  $J = 3.5$  Hz, 1H), 7.56 (t,  $J = 7.2$  Hz, 1H), 7.51 (t,  $J = 7.4$  Hz, 1H), 7.45 (d,  $J = 8.3$  Hz, 1H), 7.41–7.33 (m, 4H), 7.32 (d,  $J = 6.9$  Hz, 1H), 7.14 (d,  $J = 4.8$  Hz, 1H), 2.51 (d,  $J = 15.8$  Hz, 1H), 2.46 (d,  $J = 15.8$  Hz, 1H), 1.14 (s, 3H), 1.13 (s, 3H);  $^{13}\text{C}$  NMR (151 MHz,  $\text{CDCl}_3$ )  $\delta$  152.6, 148.0, 147.0, 146.4, 136.7, 133.6, 133.5, 131.4, 129.7, 129.7, 128.4, 128.3, 126.8, 126.4, 126.2, 126.2, 125.9, 125.7, 125.3, 124.2, 123.8, 39.9, 33.7, 28.2, 28.0; **HRMS** (ESI)  $m/z$ :  $[\text{M} + \text{H}]^+$  calcd. for  $\text{C}_{25}\text{H}_{22}\text{N}$  336.1747; Found 336.1746.

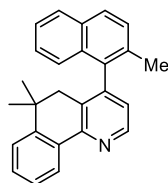

(ZYQ-2-189)ok

**6,6-dimethyl-4-(2-methylnaphthalen-1-yl)-5,6-dihydrobenzo[h]quinoline (62):**

According to the general procedure, a mixture consisting of oxime (0.6 mmol, 177.2 mg), enal (0.2 mmol, 39.3 mg),  $\text{Fe}(\text{acac})_2$  (0.02 mmol, 5.0 mg), pyrrolidine· $\text{HClO}_4$  (0.04 mmol, 6.8 mg) and 1,4-dioxane (2 mL) under a  $\text{N}_2$  atmosphere was stirred at 120 °C for 12 h to afford **62**. White solid (26.6 mg, 38% yield);  $R_f = 0.65$  (Petroleum ether/Ethyl acetate = 10:1);  $\text{Mp} = 188\text{--}189$  °C;  $^1\text{H}$  NMR (600 MHz,  $\text{CDCl}_3$ )  $\delta$  8.66 (d,  $J = 4.7$  Hz, 1H), 8.52 – 8.48 (m, 1H), 7.88 (d,  $J = 8.2$  Hz, 1H), 7.85 (d,  $J = 8.4$  Hz, 1H), 7.47 – 7.34 (m, 5H), 7.32 (t,  $J = 7.3$  Hz, 1H), 7.21 (d,  $J = 8.5$  Hz, 1H), 7.04 (d,  $J = 4.8$  Hz, 1H), 2.39 (d,  $J = 15.9$  Hz, 1H), 2.35 (d,  $J = 15.8$  Hz, 1H), 2.19 (s, 3H), 1.15 (s, 3H), 1.11 (s, 3H);  $^{13}\text{C}$  NMR (151 MHz,  $\text{CDCl}_3$ )  $\delta$  152.8, 147.5, 147.3, 146.4, 134.4, 133.4, 132.8, 131.9, 131.8, 130.1, 129.7, 128.5, 128.0, 127.9, 126.8, 126.3, 125.8, 125.4, 125.2, 124.2, 123.9, 39.5, 33.6, 28.4, 28.3, 20.3; **HRMS** (ESI)  $m/z$ :  $[\text{M} + \text{H}]^+$  calcd. for  $\text{C}_{26}\text{H}_{24}\text{N}$  350.1903; Found 350.1905.

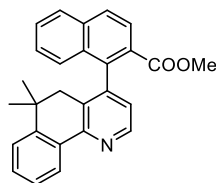

**methyl 1-(6,6-dimethyl-5,6-dihydrobenzo[h]quinolin-4-yl)-2-naphthoate (63):**

According to the general procedure, a mixture consisting of oxime (0.6 mmol, 177.2 mg), enal (0.2 mmol, 48.0 mg), Fe(acac)<sub>2</sub> (0.02 mmol, 5.0 mg), pyrrolidine·HClO<sub>4</sub> (0.04 mmol, 6.8 mg) and 1,4-dioxane (2 mL) under a N<sub>2</sub> atmosphere was stirred at 120 °C for 12 h to afford **63**. White solid (30.0 mg, 38% yield); R<sub>f</sub> = 0.5 (Petroleum ether/Ethyl acetate = 10:1); Mp = 189–190 °C; **<sup>1</sup>H NMR** (600 MHz, CDCl<sub>3</sub>) δ 8.64 (d, *J* = 4.8 Hz, 1H), 8.51 (dd, *J* = 7.3, 1.6 Hz, 1H), 8.07 (d, *J* = 8.7 Hz, 1H), 7.99 (d, *J* = 8.7 Hz, 1H), 7.95 (d, *J* = 8.2 Hz, 1H), 7.58 (t, *J* = 7.4 Hz, 1H), 7.42–7.37 (m, 3H), 7.35 (d, *J* = 8.4 Hz, 2H), 7.03 (d, *J* = 4.8 Hz, 1H), 3.61 (s, 3H), 2.41 (d, *J* = 15.8 Hz, 1H), 2.31 (d, *J* = 15.8 Hz, 1H), 1.12 (s, 3H), 1.11 (s, 3H); **<sup>13</sup>C NMR** (151 MHz, CDCl<sub>3</sub>) δ 167.6, 152.1, 147.0, 146.9, 146.3, 138.3, 134.9, 133.4, 131.5, 129.7, 129.6, 128.5, 128.2, 128.0, 127.3, 127.2, 127.1, 126.7, 125.9, 125.8, 123.8, 123.4, 52.0, 39.9, 33.6, 28.4, 28.3; **HRMS** (ESI) *m/z*: [M + H]<sup>+</sup> calcd. for C<sub>27</sub>H<sub>24</sub>NO<sub>2</sub> 394.1802; Found 394.1804.

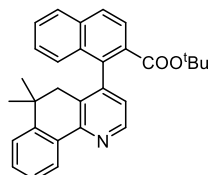

**tert-butyl 1-(6,6-dimethyl-5,6-dihydrobenzo[h]quinolin-4-yl)-2-naphthoate (64):**

According to the general procedure, a mixture consisting of oxime (0.6 mmol, 177.2 mg), enal (0.2 mmol, 56.4 mg), Fe(acac)<sub>2</sub> (0.02 mmol, 5.0 mg), pyrrolidine·HClO<sub>4</sub> (0.04 mmol, 6.8 mg) and 1,4-dioxane (2 mL) under a N<sub>2</sub> atmosphere was stirred at 120 °C for 12 h to afford **64**. White solid (38.4 mg, 44% yield); R<sub>f</sub> = 0.5 (Petroleum ether/Ethyl acetate = 10:1); Mp = 131–133 °C; **<sup>1</sup>H NMR** (600 MHz, CDCl<sub>3</sub>) δ 8.64 (d, *J* = 4.7 Hz, 1H), 8.51–8.47 (m, 1H), 8.02 (d, *J* = 8.6 Hz, 1H), 7.97 (d, *J* = 8.7 Hz, 1H), 7.94 (d, *J* = 8.2 Hz, 1H), 7.57 (t, *J* = 7.3 Hz, 1H), 7.43 – 7.33 (m, 5H), 7.07 (d, *J* = 4.8 Hz, 1H), 2.51 (d, *J* = 15.9 Hz, 1H), 2.19 (d, *J* = 15.9 Hz, 1H), 1.21 (s, 3H), 1.20 (s, 9H), 1.02 (s, 3H); **<sup>13</sup>C NMR** (151 MHz, CDCl<sub>3</sub>) δ 165.8, 151.3, 146.3, 145.8, 145.4, 135.9, 133.7, 132.2, 130.3, 129.0, 128.7, 128.5, 127.4, 127.1, 126.7, 126.1, 125.9, 125.7, 125.1, 124.8, 122.9, 122.8, 80.8, 39.0, 32.6, 27.8, 27.2, 26.7; **HRMS** (ESI) *m/z*: [M + H]<sup>+</sup> calcd. for C<sub>30</sub>H<sub>30</sub>NO<sub>2</sub> 436.2271; Found 436.2273.

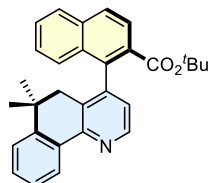

**tert-butyl (*S*)-1-(6,6-dimethyl-5,6-dihydrobenzo[h]quinolin-4-yl)-2-naphthoate (97):**

According to the general procedure, a mixture consisting of oxime (0.6 mmol, 231.2 mg), enal (0.2 mmol, 56.4 mg), Fe(acac)<sub>2</sub> (0.02 mmol, 5.0 mg), amine A4 (0.04 mmol, 18.7 mg) and 1,4-dioxane (1 mL)/toluene (1 mL) under a N<sub>2</sub> atmosphere was stirred at 50 °C for 48 h to afford **97**. Colorless oil (46.5 mg, 53% yield, 93:7 er); R<sub>f</sub> = 0.5 (Petroleum ether/Ethyl acetate = 10:1); **<sup>1</sup>H**,

$^{13}\text{C}$  NMR and HRMS spectra data for **97** were in agreement with the racemic **64**.

**HPLC analysis:** DAICEL CHIRALPAK IE, n-hexane/isopropanol = 90/10, flow rate = 1.0 mL/min,  $\lambda$  = 254 nm,  $t_R$  (major) = 6.4 min,  $t_R$  (minor) = 7.3 min, er = 93:7.

$[\alpha]^{25}_D$  = -61.39 (c = 0.32,  $\text{CHCl}_3$ ).

Chiral HPLC spectrum of (*rac*)-**97**:

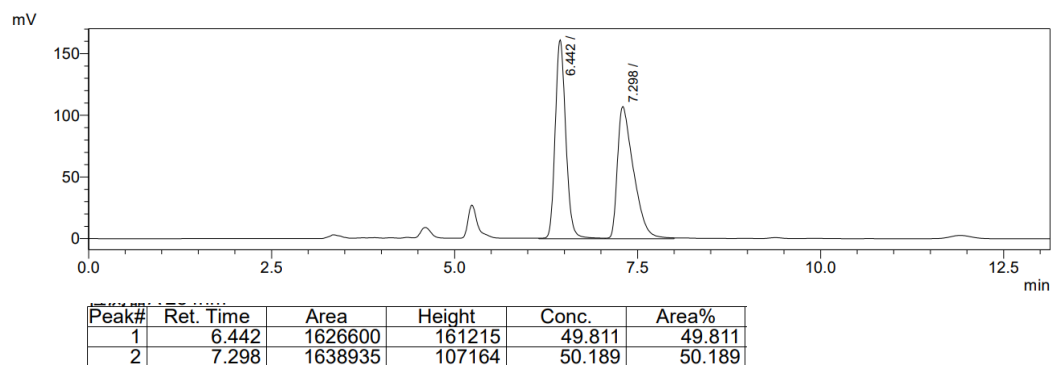

Chiral HPLC spectrum of (*S*)-**97**:

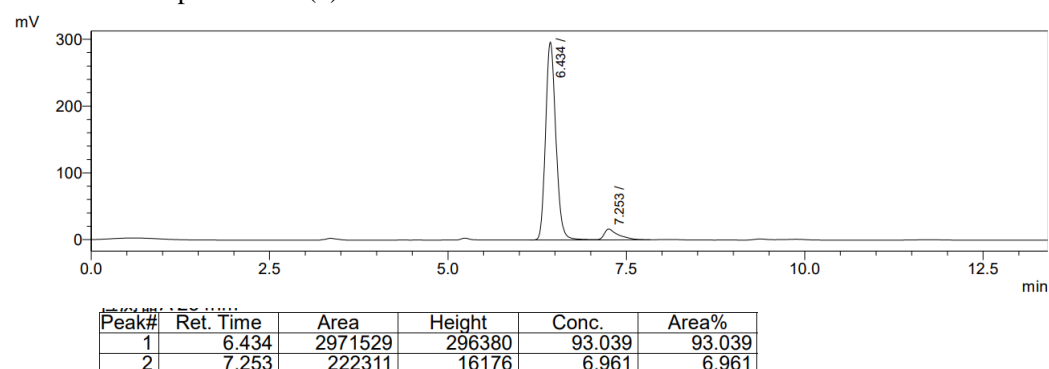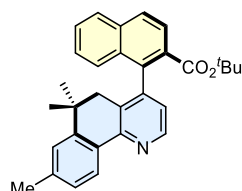

**tert-butyl (*S*)-1-(6,6,8-trimethyl-5,6-dihydrobenzo[h]quinolin-4-yl)-2-naphthoate (**98**):**

According to the general procedure, a mixture consisting of oxime (0.6 mmol, 239.6 mg), enal (0.2 mmol, 56.4 mg),  $\text{Fe}(\text{acac})_2$  (0.02 mmol, 5.0 mg), amine A4 (0.04 mmol, 18.7 mg) and 1,4-dioxane (1 mL)/toluene (1 mL) under a  $\text{N}_2$  atmosphere was stirred at 50 °C for 48 h to afford **98**.

Colorless oil (43.2 mg, 48% yield, 93:7 er);  $R_f$  = 0.5 (Petroleum ether/Ethyl acetate = 10:1);  $^1\text{H}$  NMR (600 MHz,  $\text{CDCl}_3$ )  $\delta$  8.61 (d,  $J$  = 4.2 Hz, 1H), 8.37 (d,  $J$  = 7.7 Hz, 1H), 8.02 (d,  $J$  = 8.5 Hz, 1H), 7.96 (d,  $J$  = 8.5 Hz, 1H), 7.94 (d,  $J$  = 8.0 Hz, 1H), 7.57 (t,  $J$  = 6.8 Hz, 1H), 7.42 – 7.35 (m, 2H), 7.21 (d,  $J$  = 7.7 Hz, 1H), 7.15 (s, 1H), 7.04 (d,  $J$  = 4.4 Hz, 1H), 2.49 (d,  $J$  = 15.8 Hz, 1H), 2.40 (s, 3H), 2.16 (d,  $J$  = 15.8 Hz, 1H), 1.20 (s, 12H), 1.00 (s, 3H);  $^{13}\text{C}$  NMR (151 MHz,  $\text{CDCl}_3$ )  $\delta$  166.9, 152.4, 147.3, 146.7, 146.3, 139.6, 137.0, 134.7, 131.3, 130.5, 129.7, 129.4, 128.4, 128.2, 127.7, 127.6, 127.2, 126.9, 126.1, 125.8, 124.6, 123.6, 81.8, 40.1, 33.5, 28.8, 28.2, 27.7, 21.7; HRMS (ESI)  $m/z$ :  $[\text{M} + \text{H}]^+$  calcd. for  $\text{C}_{31}\text{H}_{32}\text{NO}_2$  450.2428; Found 450.2425.

**HPLC analysis:** DAICEL CHIRALPAK IE, n-hexane/isopropanol = 95/5, flow rate = 1.0 mL/min,  $\lambda$  = 254 nm,  $t_R$  (major) = 9.1 min,  $t_R$  (minor) = 10.6 min, er = 93:7.

$[\alpha]^{25}_D$  = -70.31 (c = 0.43,  $\text{CHCl}_3$ ).

Chiral HPLC spectrum of (*rac*)-**98**:

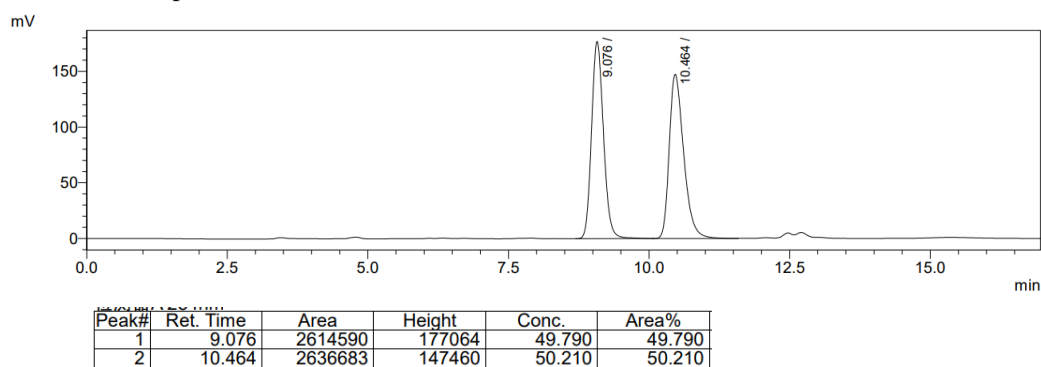

Chiral HPLC spectrum of (*S*)-**98**:

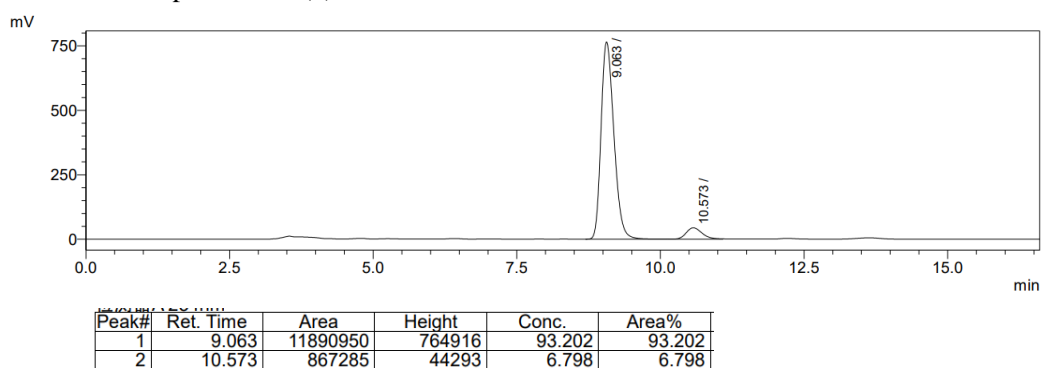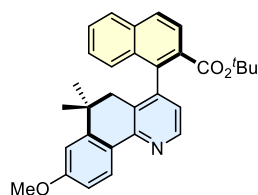

**tert-butyl (S)-1-(8-methoxy-6,6-dimethyl-5,6-dihydrobenzo[h]quinolin-4-yl)-2-naphthoate (**99**):**

According to the general procedure, a mixture consisting of oxime (0.6 mmol, 249.2 mg), enal (0.2 mmol, 56.4 mg), Fe(acac)<sub>2</sub> (0.02 mmol, 5.0 mg), amine A4 (0.04 mmol, 18.7 mg) and 1,4-dioxane (1 mL)/toluene (1 mL) under a N<sub>2</sub> atmosphere was stirred at 50 °C for 48 h to afford **99**. White solid (63.1 mg, 67% yield, 90:10 er); R<sub>f</sub> = 0.4 (Petroleum ether/Ethyl acetate = 10:1); Mp = 153–154 °C; <sup>1</sup>H NMR (600 MHz, CDCl<sub>3</sub>) δ 8.59 (d, *J* = 4.9 Hz, 1H), 8.44 (d, *J* = 8.6 Hz, 1H), 8.01 (d, *J* = 8.6 Hz, 1H), 7.96 (d, *J* = 8.7 Hz, 1H), 7.93 (d, *J* = 8.2 Hz, 1H), 7.59 – 7.54 (m, 1H), 7.42 – 7.36 (m, 2H), 7.01 (d, *J* = 4.9 Hz, 1H), 6.92 (dd, *J* = 8.7, 2.5 Hz, 1H), 6.88 (d, *J* = 2.5 Hz, 1H), 3.87 (s, 3H), 2.48 (d, *J* = 15.8 Hz, 1H), 2.16 (d, *J* = 15.8 Hz, 1H), 1.20 (s, 9H), 1.19 (s, 3H), 1.00 (s, 3H); <sup>13</sup>C NMR (151 MHz, CDCl<sub>3</sub>) δ 166.9, 161.0, 152.2, 148.4, 147.2, 146.6, 134.7, 131.3, 129.4, 129.0, 128.3, 128.1, 127.7, 127.5, 127.1, 126.9, 126.4, 126.0, 123.2, 111.3, 110.2, 81.8, 55.3, 40.0, 33.8, 28.7, 28.1, 27.7; HRMS (ESI) *m/z*: [M + H]<sup>+</sup> calcd. for C<sub>31</sub>H<sub>32</sub>NO<sub>3</sub> 466.2377; Found 466.2371.

**HPLC analysis:** DAICEL CHIRALPAK AD-H, n-hexane/isopropanol = 90/10, flow rate = 1.0 mL/min, λ = 254 nm, t<sub>R</sub> (major) = 9.7 min, t<sub>R</sub> (minor) = 6.5 min, er = 90:10.

[α]<sub>D</sub><sup>25</sup> = -70.31 (c = 0.63, CHCl<sub>3</sub>).

Chiral HPLC spectrum of (*rac*)-**99**:

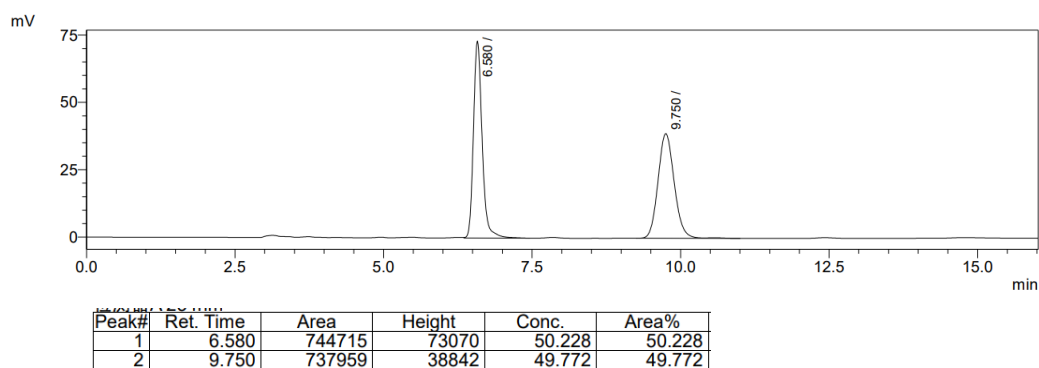

Chiral HPLC spectrum of (S)-99:

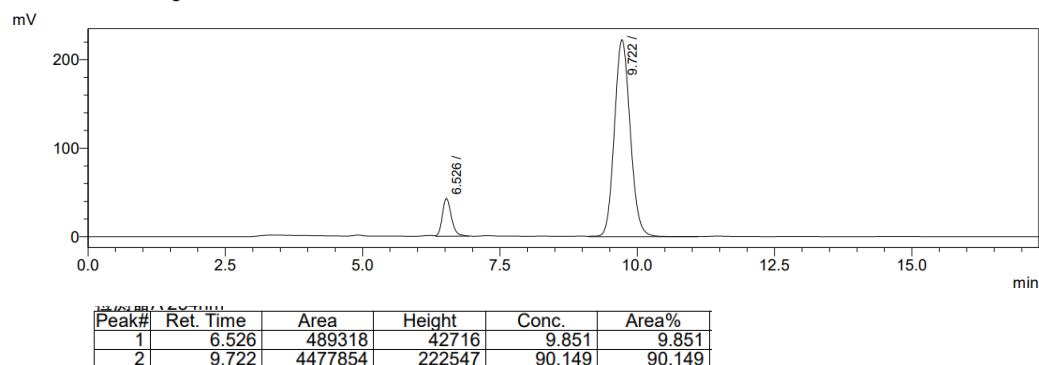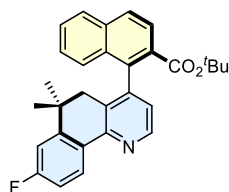

**tert-butyl (S)-1-(8-fluoro-6,6-dimethyl-5,6-dihydrobenzo[h]quinolin-4-yl)-2-naphthoate (100):**

According to the general procedure, a mixture consisting of oxime (0.6 mmol, 242.0 mg), enal (0.2 mmol, 56.4 mg), Fe(acac)<sub>3</sub> (0.02 mmol, 5.0 mg), amine A4 (0.04 mmol, 18.7 mg) and 1,4-dioxane (1 mL)/toluene (1 mL) under a N<sub>2</sub> atmosphere was stirred at 50 °C for 48 h to afford **100**. White solid (52.2 mg, 57% yield, 92:8 er); R<sub>f</sub> = 0.5 (Petroleum ether/Ethyl acetate = 10:1); Mp = 150–152 °C; <sup>1</sup>H NMR (600 MHz, CDCl<sub>3</sub>) δ 8.61 (d, *J* = 4.8 Hz, 1H), 8.49 (dd, *J* = 8.5, 6.3 Hz, 1H), 8.02 (d, *J* = 8.7 Hz, 1H), 7.97 (d, *J* = 8.7 Hz, 1H), 7.94 (d, *J* = 8.2 Hz, 1H), 7.57 (t, *J* = 7.1 Hz, 1H), 7.41 (t, *J* = 7.2 Hz, 1H), 7.35 (d, *J* = 8.5 Hz, 1H), 7.09 – 7.04 (m, 2H), 7.03 (dd, *J* = 10.2, 2.4 Hz, 1H), 2.50 (d, *J* = 15.9 Hz, 1H), 2.18 (d, *J* = 15.9 Hz, 1H), 1.21 (s, 9H), 1.19 (s, 3H), 1.00 (s, 3H); <sup>13</sup>C NMR (151 MHz, CDCl<sub>3</sub>) δ 166.7, 164.1 (d, <sup>1</sup>J<sub>C-F</sub> = 248.4 Hz), 151.5, 149.1, 149.1, 147.5, 146.8, 136.7, 134.7, 131.2, 129.5, 129.4, 128.4, 128.2, 128.0 (d, <sup>3</sup>J<sub>C-F</sub> = 8.5 Hz), 127.7, 127.0, 126.9, 126.0, 123.8, 113.6 (d, <sup>2</sup>J<sub>C-F</sub> = 21.4 Hz), 111.0 (d, <sup>2</sup>J<sub>C-F</sub> = 22.3 Hz), 81.8, 39.8, 33.8, 28.5, 28.0, 27.7; <sup>19</sup>F NMR (565 MHz, CDCl<sub>3</sub>) δ -111.42; HRMS (ESI) *m/z*: [M + H]<sup>+</sup> calcd. for C<sub>30</sub>H<sub>29</sub>FO<sub>2</sub> 454.2177; Found 454.2169.

**HPLC analysis:** DAICEL CHIRALPAK IE, n-hexane/isopropanol = 90/10, flow rate = 1.0 mL/min, λ = 254 nm, t<sub>R</sub> (major) = 5.8 min, t<sub>R</sub> (minor) = 6.4 min, er = 92:8.

[α]<sub>D</sub><sup>25</sup> = -52.89 (c = 0.23, CHCl<sub>3</sub>).

Chiral HPLC spectrum of (rac)-100:



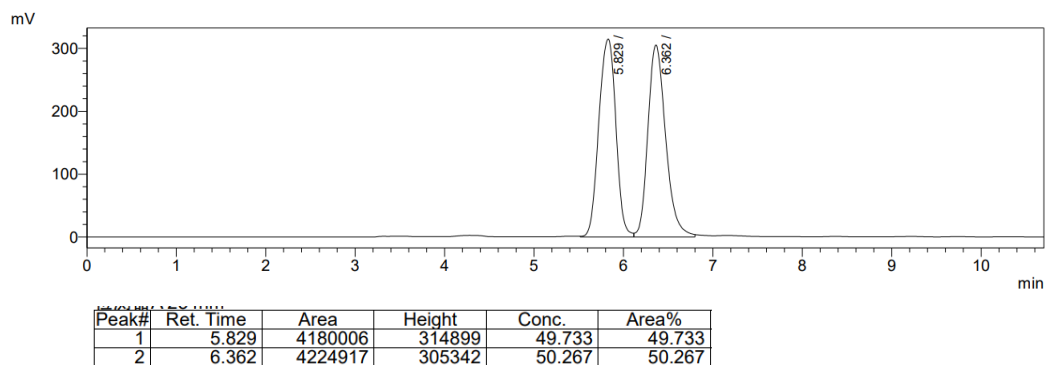

Chiral HPLC spectrum of (S)-**100**:

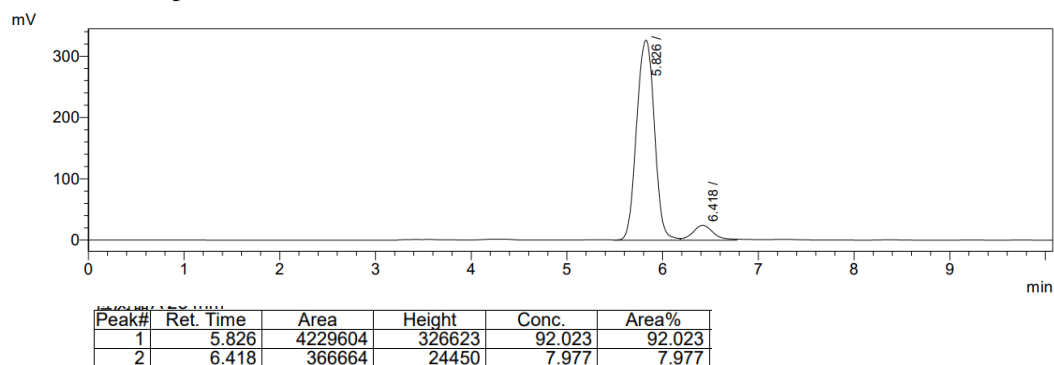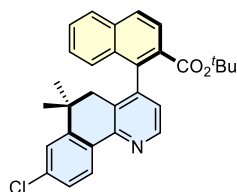

**tert-butyl (S)-1-(8-chloro-6,6-dimethyl-5,6-dihydrobenzo[*h*]quinolin-4-yl)-2-naphthoate (101):**

According to the general procedure, a mixture consisting of oxime (0.6 mmol, 251.8 mg), enal (0.2 mmol, 56.4 mg), Fe(acac)<sub>3</sub> (0.02 mmol, 5.0 mg), amine A4 (0.04 mmol, 18.7 mg) and 1,4-dioxane (1 mL)/toluene (1 mL) under a N<sub>2</sub> atmosphere was stirred at 50 °C for 48 h to afford **101**. White solid (50.4 mg, 53% yield, 94:6 er); R<sub>f</sub> = 0.5 (Petroleum ether/Ethyl acetate = 10:1); Mp = 113–114 °C; <sup>1</sup>H NMR (600 MHz, CDCl<sub>3</sub>) δ 8.63 (d, *J* = 4.8 Hz, 1H), 8.45 (d, *J* = 8.1 Hz, 1H), 8.02 (d, *J* = 8.6 Hz, 1H), 7.98 (d, *J* = 8.7 Hz, 1H), 7.95 (d, *J* = 8.2 Hz, 1H), 7.58 (t, *J* = 7.5 Hz, 1H), 7.41 (t, *J* = 7.6 Hz, 1H), 7.38 – 7.35 (m, 1H), 7.34 (d, *J* = 8.6 Hz, 1H), 7.31 (d, *J* = 1.8 Hz, 1H), 7.08 (d, *J* = 4.5 Hz, 1H), 2.50 (d, *J* = 16.0 Hz, 1H), 2.18 (d, *J* = 16.0 Hz, 1H), 1.20 (s, 9H), 1.20 (s, 3H), 1.01 (s, 3H); <sup>13</sup>C NMR (151 MHz, CDCl<sub>3</sub>) δ 166.7, 151.2, 148.2, 146.8, 136.6, 135.6, 134.7, 131.2, 129.9, 129.4, 128.5, 128.2, 127.8, 127.4, 127.1, 127.0, 126.9, 126.1, 124.3, 124.2, 81.8, 39.8, 33.8, 28.6, 27.9, 27.7; HRMS (ESI) *m/z*: [M + H]<sup>+</sup> calcd. for C<sub>30</sub>H<sub>29</sub>ClNO<sub>2</sub> 470.1881; Found 470.1887.

**HPLC analysis:** DAICEL CHIRALPAK AD-H, n-hexane/isopropanol = 90/10, flow rate = 1.0 mL/min, λ = 254 nm, t<sub>R</sub> (major) = 6.1 min, t<sub>R</sub> (minor) = 5.1 min, er = 94:6.

[α]<sub>D</sub><sup>25</sup> = -75.99 (c = 0.50, CHCl<sub>3</sub>).

Chiral HPLC spectrum of (rac)-**101**:

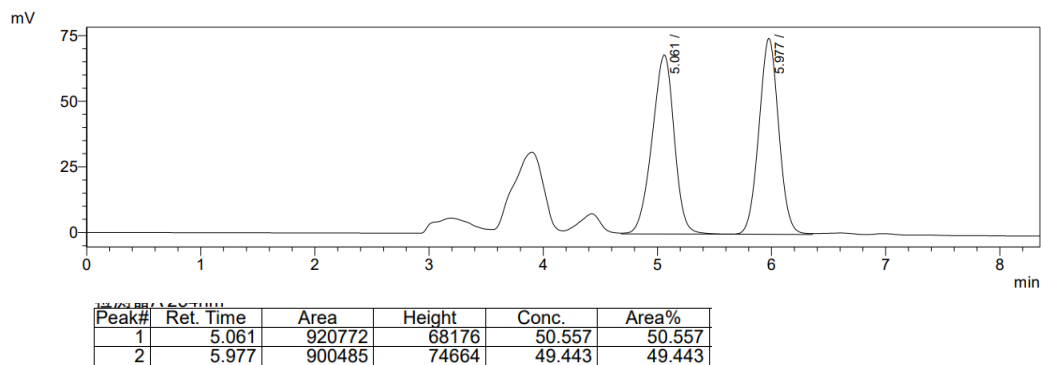

Chiral HPLC spectrum of (S)-**101**:

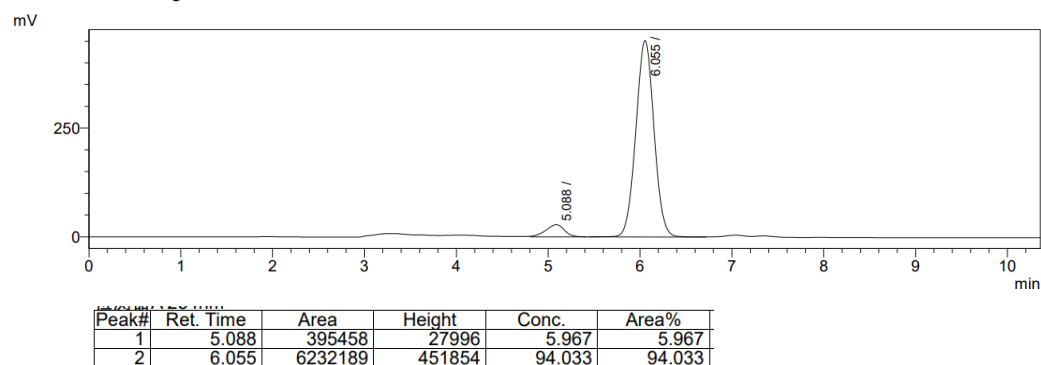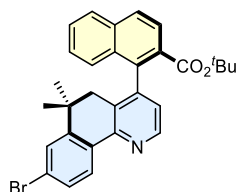

**tert-butyl (S)-1-(8-bromo-6,6-dimethyl-5,6-dihydrobenzo[h]quinolin-4-yl)-2-naphthoate (102):**

According to the general procedure, a mixture consisting of oxime (0.6 mmol, 278.5 mg), enal (0.2 mmol, 56.4 mg), Fe(acac)<sub>3</sub> (0.02 mmol, 5.0 mg), amine A4 (0.04 mmol, 18.7 mg) and 1,4-dioxane (1 mL)/toluene (1 mL) under a N<sub>2</sub> atmosphere was stirred at 50 °C for 48 h to afford **102**. Colorless oil (49.0 mg, 47% yield, 93:7 er); R<sub>f</sub> = 0.5 (Petroleum ether/Ethyl acetate = 10:1); <sup>1</sup>H NMR (600 MHz, CDCl<sub>3</sub>) δ 8.62 (d, *J* = 4.6 Hz, 1H), 8.36 (d, *J* = 8.3 Hz, 1H), 8.02 (d, *J* = 8.6 Hz, 1H), 7.98 (d, *J* = 8.7 Hz, 1H), 7.95 (d, *J* = 8.1 Hz, 1H), 7.58 (t, *J* = 7.3 Hz, 1H), 7.52 (d, *J* = 8.3 Hz, 1H), 7.47 (s, 1H), 7.41 (t, *J* = 7.5 Hz, 1H), 7.34 (d, *J* = 8.5 Hz, 1H), 7.08 (d, *J* = 4.5 Hz, 1H), 2.50 (d, *J* = 16.0 Hz, 1H), 2.17 (d, *J* = 16.0 Hz, 1H), 1.20 (s, 12H), 1.01 (s, 3H); <sup>13</sup>C NMR (151 MHz, CDCl<sub>3</sub>) δ 166.7, 151.3, 148.4, 147.6, 146.9, 136.6, 134.7, 132.2, 131.2, 129.9, 129.9, 129.4, 128.5, 128.2, 127.8, 127.6, 127.3, 127.0, 126.9, 126.1, 124.2, 124.1, 81.8, 39.8, 33.8, 28.6, 27.9, 27.7; HRMS (ESI) *m/z*: [M + H]<sup>+</sup> calcd. for C<sub>30</sub>H<sub>29</sub>BrNO<sub>2</sub> 514.1376; Found 514.1375.

**HPLC analysis:** DAICEL CHIRALPAK IE, n-hexane/isopropanol = 90/10, flow rate = 1.0 mL/min, λ = 254 nm, t<sub>R</sub> (major) = 6.5 min, t<sub>R</sub> (minor) = 5.4 min, er = 93:7.

[α]<sub>D</sub><sup>25</sup> = -71.74 (c = 0.46, CHCl<sub>3</sub>).

Chiral HPLC spectrum of (rac)-**102**:

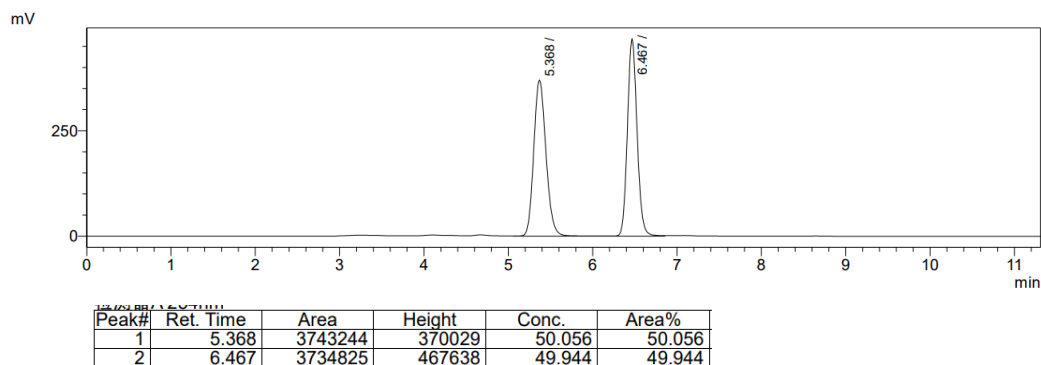

Chiral HPLC spectrum of (S)-**102**:

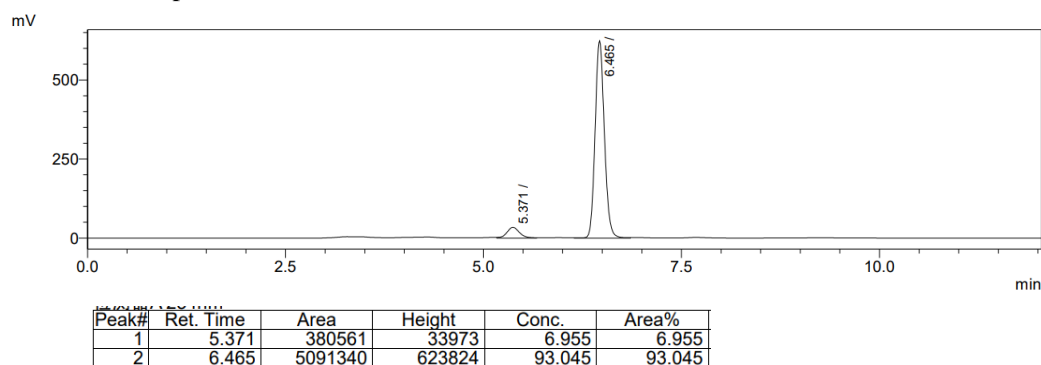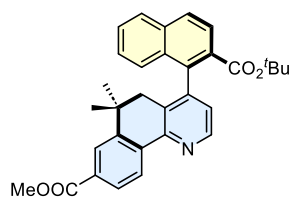

**methyl (S)-4-(2-(tert-butoxycarbonyl)naphthalen-1-yl)-6,6-dimethyl-5,6-dihydrobenzo[h]quinoline-8-carboxylate (**103**):**

According to the general procedure, a mixture consisting of oxime (0.6 mmol, 266.6 mg), enal (0.2 mmol, 56.4 mg), Fe(acac)<sub>3</sub> (0.02 mmol, 5.0 mg), amine A4 (0.04 mmol, 18.7 mg) and 1,4-dioxane (1 mL)/toluene (1 mL) under a N<sub>2</sub> atmosphere was stirred at 50 °C for 48 h to afford **103**. Colorless oil (40.5 mg, 41% yield, 93:7 er); R<sub>f</sub> = 0.3 (Petroleum ether/Ethyl acetate = 10:1); <sup>1</sup>H NMR (600 MHz, CDCl<sub>3</sub>) δ 8.67 (d, *J* = 4.8 Hz, 1H), 8.57 (d, *J* = 8.1 Hz, 1H), 8.08 – 8.05 (m, 1H), 8.03 – 8.01 (m, 2H), 7.98 (d, *J* = 8.7 Hz, 1H), 7.95 (d, *J* = 8.2 Hz, 1H), 7.58 (t, *J* = 7.3 Hz, 1H), 7.41 (t, *J* = 7.4 Hz, 1H), 7.35 (d, *J* = 8.5 Hz, 1H), 7.12 (d, *J* = 4.8 Hz, 1H), 3.94 (s, 3H), 2.54 (d, *J* = 16.0 Hz, 1H), 2.22 (d, *J* = 16.0 Hz, 1H), 1.26 (s, 3H), 1.20 (s, 9H), 1.05 (s, 3H); <sup>13</sup>C NMR (151 MHz, CDCl<sub>3</sub>) δ 167.2, 166.7, 151.2, 147.8, 147.1, 146.4, 137.4, 136.5, 134.7, 131.2, 130.9, 130.8, 129.4, 128.5, 128.2, 128.0, 127.8, 127.1, 126.9, 126.1, 125.9, 125.5, 124.7, 81.8, 52.1, 39.8, 33.7, 28.7, 28.1, 27.7; HRMS (ESI) *m/z*: [M + H]<sup>+</sup> calcd. for C<sub>32</sub>H<sub>32</sub>NO<sub>4</sub> 494.2326; Found 494.2323.

**HPLC analysis:** DAICEL CHIRALPAK AD-H, n-hexane/isopropanol = 90/10, flow rate = 1.0 mL/min, λ = 254 nm, t<sub>R</sub> (major) = 10.9 min, t<sub>R</sub> (minor) = 6.7 min, er = 93:7.

[α]<sub>D</sub><sup>25</sup> = -77.43 (c = 0.41, CHCl<sub>3</sub>).

Chiral HPLC spectrum of (rac)-**103**:

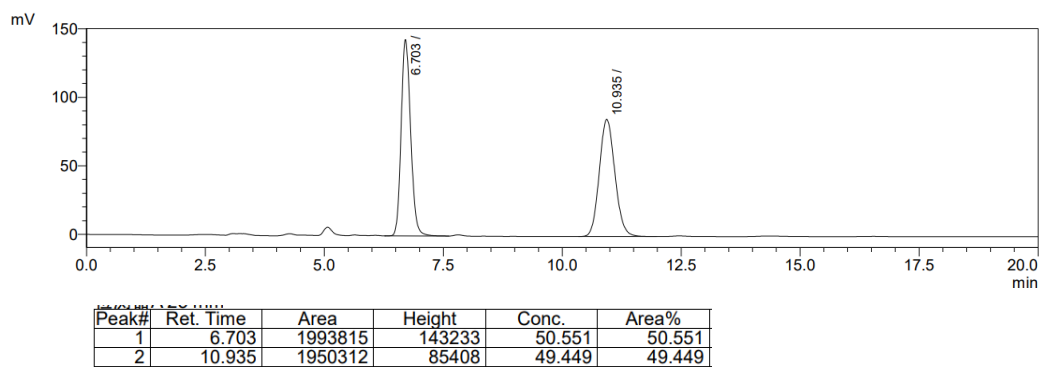

Chiral HPLC spectrum of (S)-**103**:

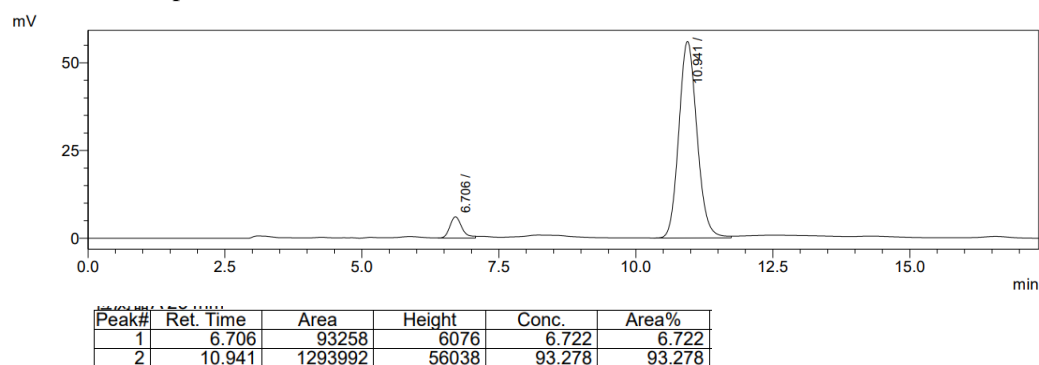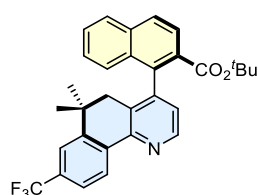

**tert-butyl (S)-1-(6,6-dimethyl-8-(trifluoromethyl)-5,6-dihydrobenzo[h]quinolin-4-yl)-2-naphthoate (**104**):**

According to the general procedure, a mixture consisting of oxime (0.6 mmol, 272.0 mg), enal (0.2 mmol, 56.4 mg), Fe(acac)<sub>3</sub> (0.02 mmol, 5.0 mg), amine A4 (0.04 mmol, 18.7 mg) and 1,4-dioxane (1 mL)/toluene (1 mL) under a N<sub>2</sub> atmosphere was stirred at 50 °C for 48 h to afford **104**. Colorless oil (54.4 mg, 54% yield, 94:6 er); R<sub>f</sub> = 0.5 (Petroleum ether/Ethyl acetate = 10:1); **<sup>1</sup>H NMR** (600 MHz, CDCl<sub>3</sub>) δ 8.67 (d, *J* = 4.2 Hz, 1H), 8.61 (d, *J* = 8.0 Hz, 1H), 8.04 (d, *J* = 8.5 Hz, 1H), 7.99 (d, *J* = 8.6 Hz, 1H), 7.96 (d, *J* = 8.1 Hz, 1H), 7.64 (d, *J* = 8.1 Hz, 1H), 7.61 – 7.56 (m, 2H), 7.42 (t, *J* = 7.5 Hz, 1H), 7.33 (d, *J* = 8.4 Hz, 1H), 7.13 (d, *J* = 4.0 Hz, 1H), 2.54 (d, *J* = 16.0 Hz, 1H), 2.22 (d, *J* = 16.0 Hz, 1H), 1.25 (s, 3H), 1.21 (s, 9H), 1.04 (s, 3H); **<sup>13</sup>C NMR** (151 MHz, CDCl<sub>3</sub>) δ 166.6, 150.8, 147.9, 147.1, 146.9, 136.5, 134.7, 131.2 (q, <sup>2</sup>*J*<sub>C-F</sub> = 31.8 Hz), 131.1, 130.6, 129.4, 128.6, 128.3, 127.83, 127.1, 126.9, 126.2, 126.1, 125.3 (q, <sup>1</sup>*J*<sub>C-F</sub> = 272.2 Hz), 124.8, 123.6 (q, <sup>3</sup>*J*<sub>C-F</sub> = 3.6 Hz), 121.0 (q, <sup>3</sup>*J*<sub>C-F</sub> = 3.8 Hz), 81.9, 39.6, 33.8, 28.6, 27.9, 27.7; **<sup>19</sup>F NMR** (565 MHz, CDCl<sub>3</sub>) δ -62.46; **HRMS** (ESI) *m/z*: [M + H]<sup>+</sup> calcd. for C<sub>31</sub>H<sub>29</sub>F<sub>3</sub>NO<sub>2</sub> 504.2145; Found 504.2143.

**HPLC analysis:** DAICEL CHIRALPAK AD-H, n-hexane/isopropanol = 88/12, flow rate = 0.6 mL/min, λ = 254 nm, t<sub>R</sub> (major) = 7.4 min, t<sub>R</sub> (minor) = 7.0 min, er = 94:6.

[α]<sub>D</sub><sup>25</sup> = -62.56 (c = 0.39, CHCl<sub>3</sub>).

Chiral HPLC spectrum of (*rac*)-**104**:

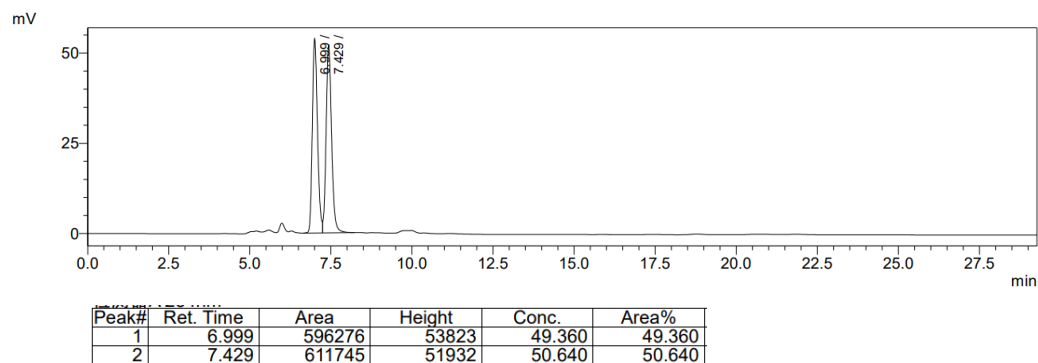

Chiral HPLC spectrum of (S)-**104**:

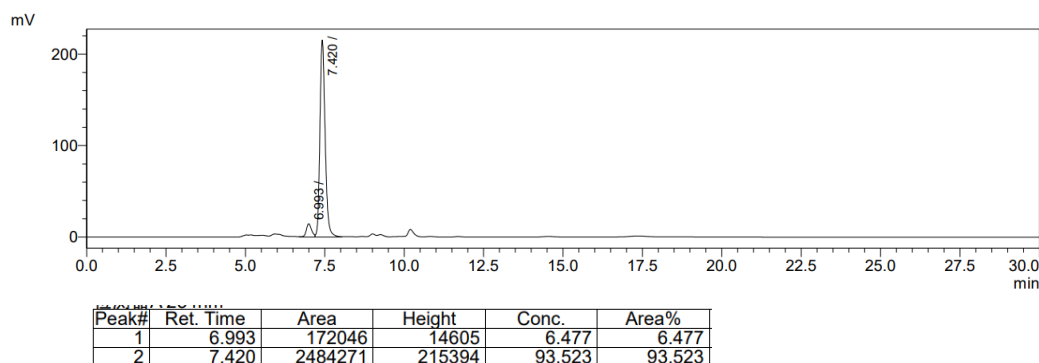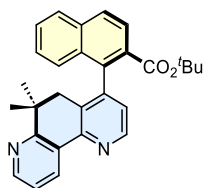

**tert-butyl (S)-1-(6,6-dimethyl-5,6-dihydro-1,7-phenanthrolin-4-yl)-2-naphthoate (**105**):**

According to the general procedure, a mixture consisting of oxime (0.6 mmol, 231.8 mg), enal (0.2 mmol, 56.4 mg), Fe(acac)<sub>3</sub> (0.02 mmol, 5.0 mg), amine A4 (0.04 mmol, 18.7 mg) and 1,4-dioxane (1 mL)/toluene (1 mL) under a N<sub>2</sub> atmosphere was stirred at 50 °C for 48 h to afford **105**. Colorless oil (27.6 mg, 31% yield, 93:7 er); R<sub>f</sub> = 0.5 (Petroleum ether/Ethyl acetate = 10:1); <sup>1</sup>H NMR (600 MHz, CDCl<sub>3</sub>) δ 8.74 (dd, *J* = 7.9, 1.7 Hz, 1H), 8.64 (d, *J* = 4.8 Hz, 1H), 8.59 (dd, *J* = 4.8, 1.7 Hz, 1H), 8.04 (d, *J* = 8.7 Hz, 1H), 7.99 (d, *J* = 8.7 Hz, 1H), 7.96 (d, *J* = 8.2 Hz, 1H), 7.61 – 7.57 (m, 1H), 7.44 – 7.40 (m, 1H), 7.35 (d, *J* = 8.5 Hz, 1H), 7.32 (dd, *J* = 7.8, 4.8 Hz, 1H), 7.11 (d, *J* = 4.8 Hz, 1H), 2.63 (d, *J* = 16.2 Hz, 1H), 2.31 (d, *J* = 16.2 Hz, 1H), 1.28 (s, 3H), 1.22 (s, 9H), 1.07 (s, 3H); <sup>13</sup>C NMR (151 MHz, CDCl<sub>3</sub>) δ 166.6, 164.4, 150.9, 149.7, 147.8, 147.1, 136.6, 134.7, 133.0, 131.1, 130.0, 129.3, 128.5, 128.5, 128.3, 127.8, 127.1, 126.9, 126.1, 124.5, 122.2, 81.8, 39.6, 36.1, 27.7, 27.4, 26.9; HRMS (ESI) *m/z*: [M + H]<sup>+</sup> calcd. for C<sub>29</sub>H<sub>29</sub>N<sub>2</sub>O<sub>2</sub> 437.2224; Found 437.2223.

**HPLC analysis:** DAICEL CHIRALPAK AD-H, n-hexane/isopropanol = 90/10, flow rate = 1.0 mL/min, λ = 254 nm, t<sub>R</sub> (major) = 6.7 min, t<sub>R</sub> (minor) = 5.7 min, er = 93:7.

[α]<sub>D</sub><sup>25</sup> = -73.14 (c = 0.24, CHCl<sub>3</sub>).

Chiral HPLC spectrum of (rac)-**105**:

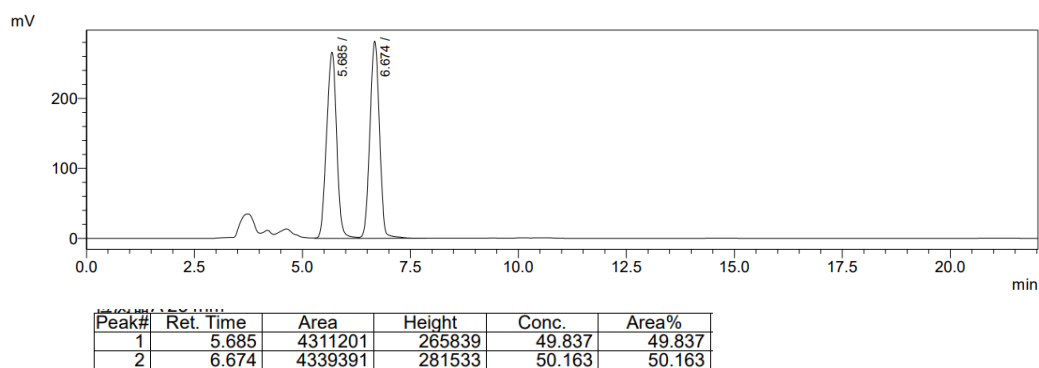

Chiral HPLC spectrum of (S)-**105**:

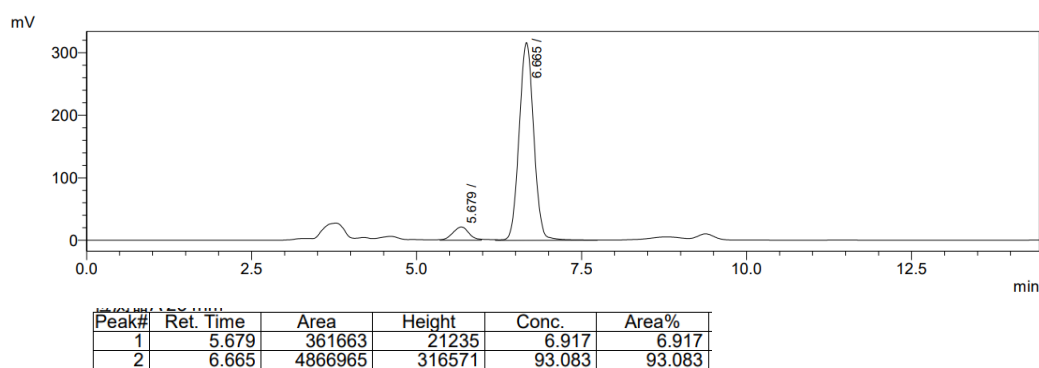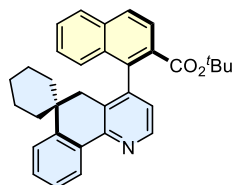

**tert-butyl (S)-1-(5H-spiro[benzo[*h*]quinoline-6,1'-cyclohexan]-4-yl)-2-naphthoate (**106**):**

According to the general procedure, a mixture consisting of oxime (0.6 mmol, 255.2 mg), enal (0.2 mmol, 56.4 mg), Fe(acac)<sub>3</sub> (0.02 mmol, 5.0 mg), amine A4 (0.04 mmol, 18.7 mg) and 1,4-dioxane (1 mL)/toluene (1 mL) under a N<sub>2</sub> atmosphere was stirred at 50 °C for 48 h to afford **106**. White solid (43.0 mg, 36% yield, 93:7 er); R<sub>f</sub> = 0.5 (Petroleum ether/Ethyl acetate = 10:1); Mp = 127–129 °C; <sup>1</sup>H NMR (600 MHz, CDCl<sub>3</sub>) δ 8.63 (d, *J* = 4.8 Hz, 1H), 8.54 – 8.49 (m, 1H), 8.08 (d, *J* = 8.7 Hz, 1H), 7.98 (d, *J* = 8.7 Hz, 1H), 7.94 (d, *J* = 8.2 Hz, 1H), 7.58 – 7.54 (m, 1H), 7.47 – 7.43 (m, 1H), 7.41 – 7.38 (m, 2H), 7.38 – 7.34 (m, 2H), 7.08 (d, *J* = 4.9 Hz, 1H), 2.52 (d, *J* = 16.1 Hz, 1H), 2.45 (d, *J* = 16.1 Hz, 1H), 1.76 (td, *J* = 12.6, 3.7 Hz, 1H), 1.56 (d, *J* = 13.3 Hz, 1H), 1.51 (d, *J* = 13.3 Hz, 1H), 1.45 – 1.38 (m, 2H), 1.32 – 1.27 (m, 1H), 1.20 (s, 9H), 1.13 – 1.01 (m, 3H), 0.60 – 0.50 (m, 1H); <sup>13</sup>C NMR (151 MHz, CDCl<sub>3</sub>) δ 166.7, 152.5, 147.5, 147.1, 146.6, 137.1, 134.7, 133.7, 131.5, 129.7, 129.3, 129.1, 128.4, 128.1, 127.7, 127.2, 126.9, 126.6, 126.2, 125.9, 124.0, 123.5, 81.8, 36.4, 35.4, 35.3, 32.7, 27.7, 25.8, 22.1, 21.9; HRMS (ESI) *m/z*: [M + H]<sup>+</sup> calcd. for C<sub>33</sub>H<sub>33</sub>NO<sub>2</sub> 476.2584; Found 476.2583.

**HPLC analysis:** DAICEL CHIRALPAK AD-H, n-hexane/isopropanol = 95/5, flow rate = 1.0 mL/min, λ = 254 nm, t<sub>R</sub> (major) = 9.2 min, t<sub>R</sub> (minor) = 5.6 min, er = 93:7.

[α]<sub>D</sub><sup>25</sup> = -73.14 (c = 0.24, CHCl<sub>3</sub>).

Chiral HPLC spectrum of (*rac*)-**106**:

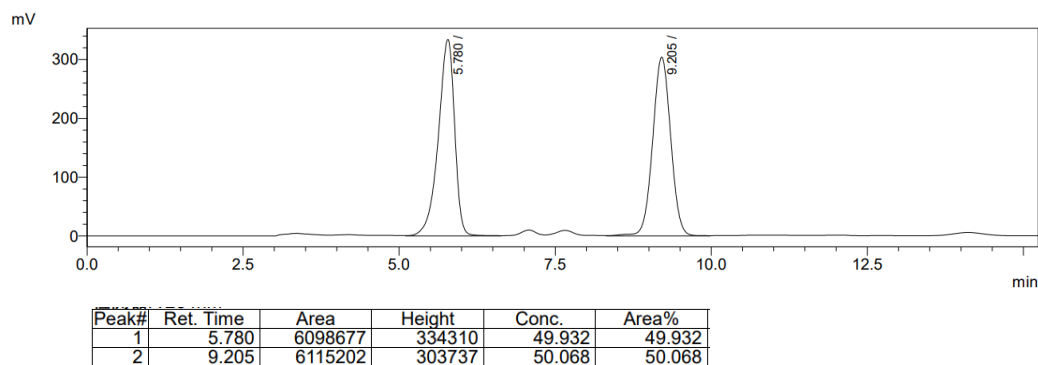

Chiral HPLC spectrum of (S)-**106**:

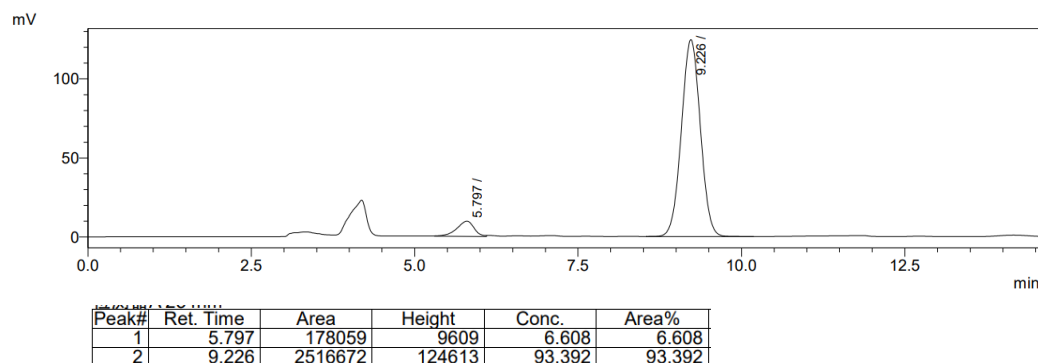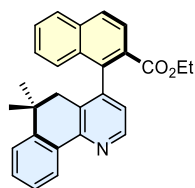

**ethyl (S)-1-(6,6-dimethyl-5,6-dihydrobenzo[h]quinolin-4-yl)-2-naphthoate (**107**):**

According to the general procedure, a mixture consisting of oxime (0.6 mmol, 231.2 mg), enal (0.2 mmol, 50.8 mg), Fe(acac)<sub>3</sub> (0.02 mmol, 5.0 mg), amine A4 (0.04 mmol, 18.7 mg) and 1,4-dioxane (1 mL)/toluene (1 mL) under a N<sub>2</sub> atmosphere was stirred at 50 °C for 48 h to afford **107**. Colorless oil (36.7 mg, 45% yield, 93:7 er); R<sub>f</sub> = 0.5 (Petroleum ether/Ethyl acetate = 10:1); <sup>1</sup>H NMR (600 MHz, CDCl<sub>3</sub>) δ 8.63 (d, *J* = 4.8 Hz, 1H), 8.53 – 8.48 (m, 1H), 8.09 (d, *J* = 8.7 Hz, 1H), 7.99 (d, *J* = 8.7 Hz, 1H), 7.95 (d, *J* = 8.2 Hz, 1H), 7.58 (t, *J* = 7.4 Hz, 1H), 7.43 – 7.33 (m, 5H), 7.05 (d, *J* = 4.8 Hz, 1H), 4.12 (dq, *J* = 10.9, 7.1 Hz, 1H), 4.02 (dq, *J* = 10.9, 7.1 Hz, 1H), 2.44 (d, *J* = 15.8 Hz, 1H), 2.28 (d, *J* = 15.8 Hz, 1H), 1.15 (s, 3H), 1.09 (s, 3H), 0.97 (t, *J* = 7.1 Hz, 3H); <sup>13</sup>C NMR (151 MHz, CDCl<sub>3</sub>) δ 167.3, 152.1, 147.2, 146.8, 146.3, 138.0, 134.9, 133.3, 131.4, 129.8, 129.7, 128.5, 128.2, 128.0, 127.6, 127.2, 127.1, 126.8, 126.0, 125.9, 123.9, 123.7, 61.1, 39.9, 33.6, 28.4, 28.3, 13.7; HRMS (ESI) *m/z*: [M + H]<sup>+</sup> calcd. for C<sub>28</sub>H<sub>26</sub>NO<sub>2</sub> 408.1958; Found 408.1958.

**HPLC analysis:** DAICEL CHIRALPAK IE, n-hexane/isopropanol = 90/10, flow rate = 1.0 mL/min, λ = 254 nm, t<sub>R</sub> (major) = 9.2 min, t<sub>R</sub> (minor) = 9.8 min, er = 90:10.

[α]<sub>D</sub><sup>25</sup> = -94.95 (c = 0.28, CHCl<sub>3</sub>).

Chiral HPLC spectrum of (rac)-**107**:

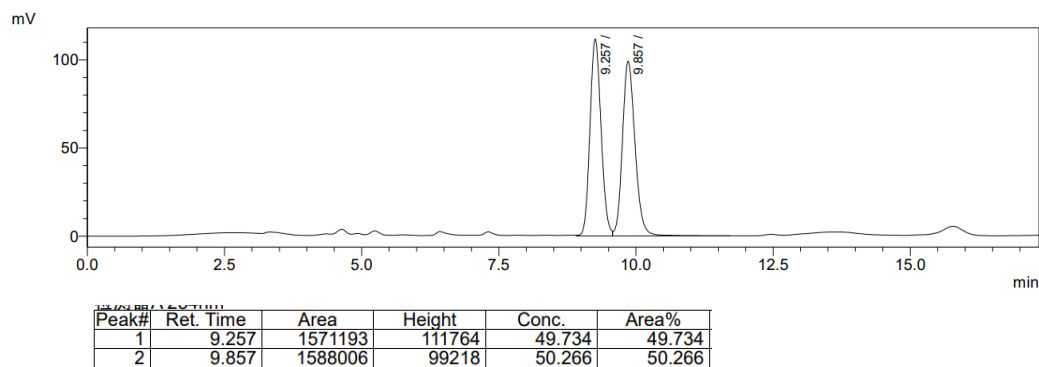

Chiral HPLC spectrum of (S)-**107**:

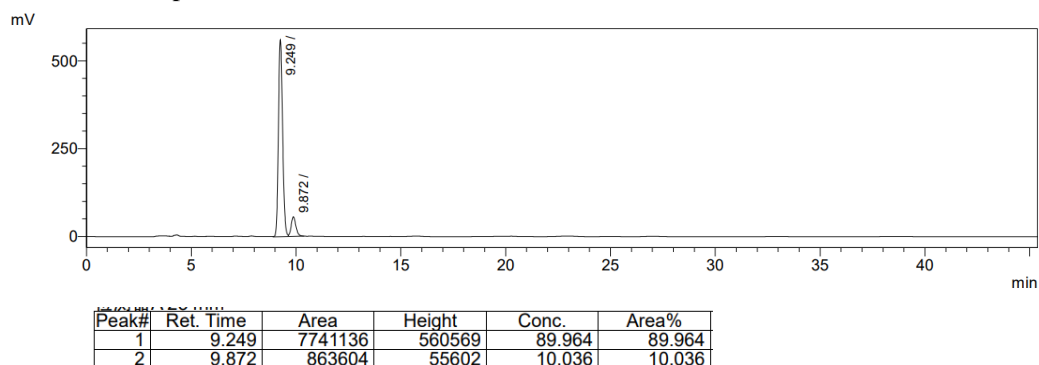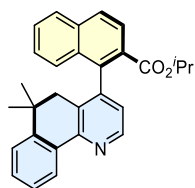

**isopropyl (S)-1-(6,6-dimethyl-5,6-dihydrobenzo[h]quinolin-4-yl)-2-naphthoate (**108**):**

According to the general procedure, a mixture consisting of oxime (0.6 mmol, 231.2 mg), enal (0.2 mmol, 53.6 mg), Fe(acac)<sub>3</sub> (0.02 mmol, 5.0 mg), amine A4 (0.04 mmol, 18.7 mg) and 1,4-dioxane (1 mL)/toluene (1 mL) under a N<sub>2</sub> atmosphere was stirred at 50 °C for 48 h to afford **108**. Colorless oil (35.5 mg, 42% yield, 92:8 er); R<sub>f</sub> = 0.5 (Petroleum ether/Ethyl acetate = 10:1); <sup>1</sup>H NMR (600 MHz, CDCl<sub>3</sub>) δ 8.63 (d, *J* = 4.8 Hz, 1H), 8.51 – 8.47 (m, 1H), 8.06 (d, *J* = 8.7 Hz, 1H), 7.98 (d, *J* = 8.7 Hz, 1H), 7.95 (d, *J* = 8.2 Hz, 1H), 7.60 – 7.55 (m, 1H), 7.43 – 7.33 (m, 5H), 7.06 (d, *J* = 4.8 Hz, 1H), 5.01 – 4.93 (m, 1H), 2.47 (d, *J* = 15.9 Hz, 1H), 2.23 (d, *J* = 15.8 Hz, 1H), 1.18 (s, 3H), 1.05 (s, 3H), 0.97 (s, 3H), 0.96 (s, 3H); <sup>13</sup>C NMR (151 MHz, CDCl<sub>3</sub>) δ 167.0, 152.1, 147.2, 146.8, 146.3, 137.6, 134.8, 133.2, 131.3, 130.0, 129.7, 128.4, 128.2, 128.1, 127.9, 127.1, 127.0, 126.8, 126.1, 125.8, 123.9, 123.8, 68.8, 40.0, 33.6, 28.6, 28.3, 21.4, 21.3; HRMS (ESI) *m/z*: [M + H]<sup>+</sup> calcd. for C<sub>29</sub>H<sub>28</sub>NO<sub>2</sub> 422.2115; Found 422.2114.

**HPLC analysis:** DAICEL CHIRALPAK IE, n-hexane/isopropanol = 90/10, flow rate = 1.0 mL/min, λ = 254 nm, t<sub>R</sub> (major) = 8.1 min, t<sub>R</sub> (minor) = 8.6 min, er = 92:8.

[α]<sub>D</sub><sup>25</sup> = -82.81 (c = 0.32, CHCl<sub>3</sub>).

Chiral HPLC spectrum of (*rac*)-**108**:



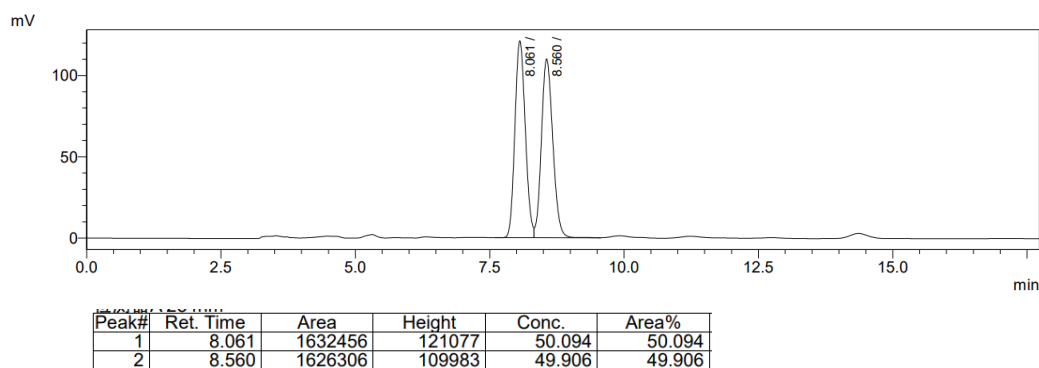

Chiral HPLC spectrum of (S)-108:

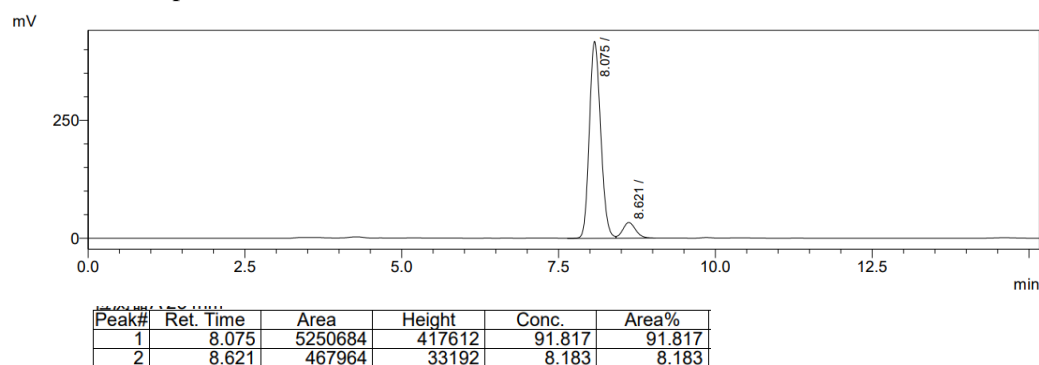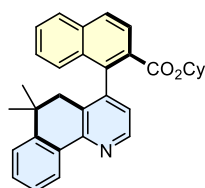

**cyclohexyl (S)-1-(6,6-dimethyl-5,6-dihydrobenzo[h]quinolin-4-yl)-2-naphthoate (109):**

According to the general procedure, a mixture consisting of oxime (0.6 mmol, 231.2 mg), enal (0.2 mmol, 61.7 mg), Fe(acac)<sub>3</sub> (0.02 mmol, 5.0 mg), amine A4 (0.04 mmol, 18.7 mg) and 1,4-dioxane (1 mL)/toluene (1 mL) under a N<sub>2</sub> atmosphere was stirred at 50 °C for 48 h to afford **109**. White solid (46.3 mg, 50% yield, 90:10 er); R<sub>f</sub> = 0.5 (Petroleum ether/Ethyl acetate = 10:1); Mp = 151–152 °C; <sup>1</sup>H NMR (600 MHz, CDCl<sub>3</sub>) δ 8.63 (d, *J* = 4.4 Hz, 1H), 8.48 (d, *J* = 7.0 Hz, 1H), 8.07 (d, *J* = 8.6 Hz, 1H), 7.98 (d, *J* = 8.6 Hz, 1H), 7.95 (d, *J* = 8.1 Hz, 1H), 7.58 (t, *J* = 7.2 Hz, 1H), 7.44 – 7.31 (m, 5H), 7.06 (d, *J* = 4.5 Hz, 1H), 4.77 – 4.68 (m, 1H), 2.46 (d, *J* = 15.8 Hz, 1H), 2.23 (d, *J* = 15.8 Hz, 1H), 1.70 – 1.62 (m, 2H), 1.60 – 1.50 (m, 2H), 1.48 – 1.40 (m, 1H), 1.28 – 1.19 (m, 2H), 1.18 (s, 3H), 1.05 (s, 6H); <sup>13</sup>C NMR (151 MHz, CDCl<sub>3</sub>) δ 166.9, 152.2, 147.2, 146.8, 146.3, 137.6, 134.8, 133.3, 131.3, 123.0, 129.7, 128.4, 128.2, 127.9, 127.1, 127.0, 126.8, 126.1, 125.8, 123.8, 74.0, 40.0, 33.6, 31.3, 31.2, 28.5, 28.3, 25.2, 23.8; HRMS (ESI) *m/z*: [M + H]<sup>+</sup> calcd. for C<sub>32</sub>H<sub>32</sub>NO<sub>2</sub> 462.2428; Found 462.2430.

**HPLC analysis:** DAICEL CHIRALPAK IE, n-hexane/isopropanol = 90/10, flow rate = 1.0 mL/min, λ = 254 nm, t<sub>R</sub> (major) = 8.4 min, t<sub>R</sub> (minor) = 9.3 min, er = 90:10.

[α]<sub>D</sub><sup>25</sup> = -50.11 (c = 0.44, CHCl<sub>3</sub>).

Chiral HPLC spectrum of (rac)-109:

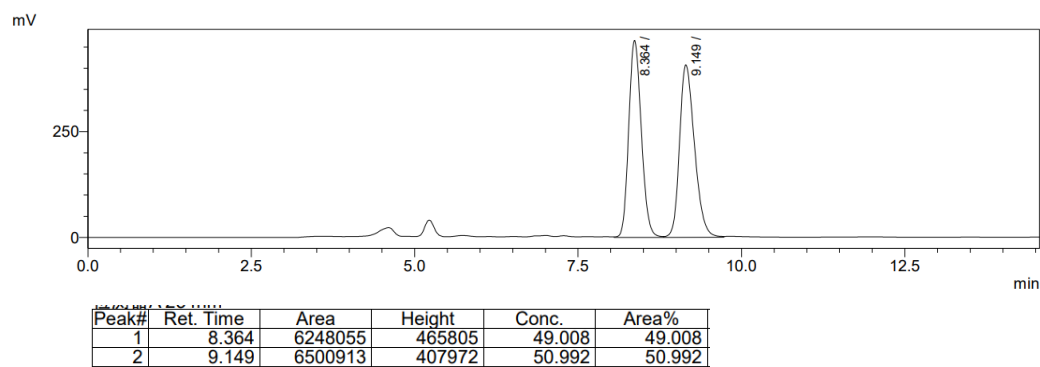

Chiral HPLC spectrum of (S)-**109**:

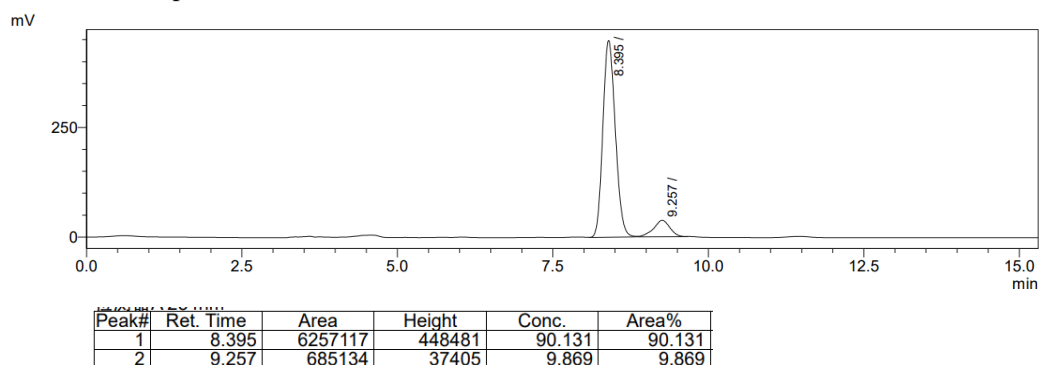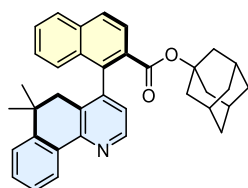

**adamantan-1-yl (S)-1-(6,6-dimethyl-5,6-dihydrobenzo[h]quinolin-4-yl)-2-naphthoate (**110**):**

According to the general procedure, a mixture consisting of oxime (0.6 mmol, 231.2 mg), enal (0.2 mmol, 72.1 mg), Fe(acac)<sub>2</sub> (0.02 mmol, 5.0 mg), amine A4 (0.04 mmol, 18.7 mg) and 1,4-dioxane (1 mL)/toluene (1 mL) under a N<sub>2</sub> atmosphere was stirred at 50 °C for 48 h to afford **110**. Colorless oil (51.4 mg, 50% yield, 91:9 er); R<sub>f</sub> = 0.5 (Petroleum ether/Ethyl acetate = 10:1); <sup>1</sup>H NMR (600 MHz, CDCl<sub>3</sub>) δ 8.64 (d, *J* = 4.8 Hz, 1H), 8.50 – 8.44 (m, 1H), 8.01 (d, *J* = 8.6 Hz, 1H), 7.96 (d, *J* = 8.7 Hz, 1H), 7.93 (d, *J* = 8.2 Hz, 1H), 7.59 – 7.54 (m, 1H), 7.42 – 7.34 (m, 5H), 7.07 (d, *J* = 4.9 Hz, 1H), 2.51 (d, *J* = 15.9 Hz, 1H), 2.18 (d, *J* = 15.9 Hz, 1H), 2.03 – 1.98 (m, 3H), 1.84 – 1.79 (m, 6H), 1.54 – 1.50 (m, 6H), 1.21 (s, 3H), 1.02 (s, 3H); <sup>13</sup>C NMR (151 MHz, CDCl<sub>3</sub>) δ 166.5, 152.3, 147.3, 146.8, 146.4, 136.8, 134.6, 133.3, 131.2, 130.2, 129.7, 129.6, 128.4, 128.2, 127.7, 127.1, 126.9, 126.8, 126.1, 125.7, 124.0, 123.9, 82.1, 40.9, 40.0, 36.0, 33.6, 30.8, 28.7, 28.2; HRMS (ESI) *m/z*: [M + H]<sup>+</sup> calcd. for C<sub>36</sub>H<sub>36</sub>NO<sub>2</sub> 514.2741; Found 514.2735.

**HPLC analysis:** DAICEL CHIRALPAK IE, n-hexane/isopropanol = 90/10, flow rate = 1.0 mL/min, λ = 254 nm, t<sub>R</sub> (major) = 7.8 min, t<sub>R</sub> (minor) = 9.6 min, er = 91:9.

[α]<sub>D</sub><sup>25</sup> = -31.83 (c = 0.51, CHCl<sub>3</sub>).

Chiral HPLC spectrum of (rac)-**110**:

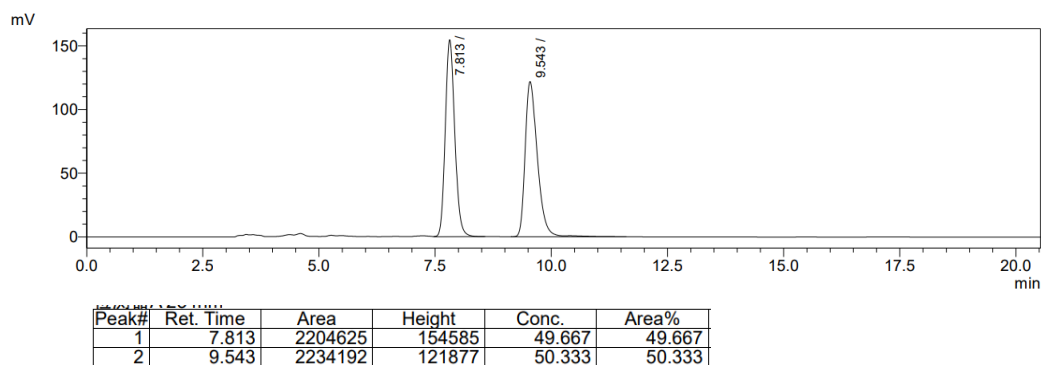

Chiral HPLC spectrum of (S)-110:

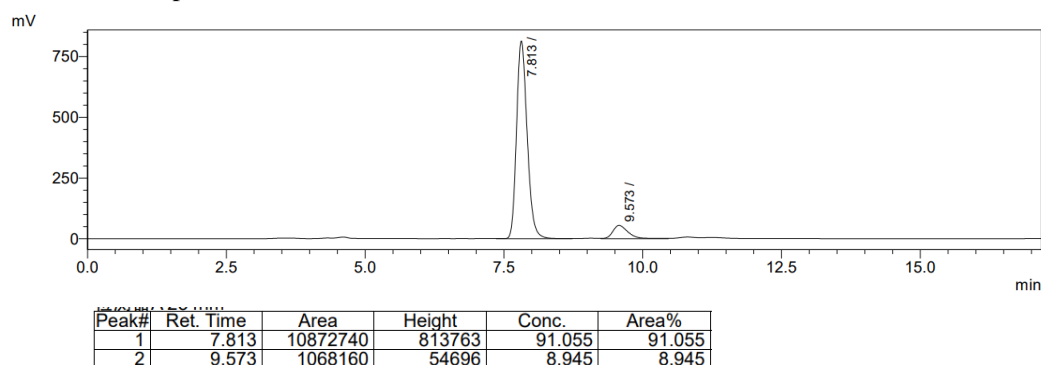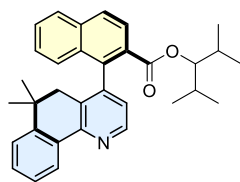

**2,4-dimethylpentan-3-yl (S)-1-(6,6-dimethyl-5,6-dihydrobenzo[h]quinolin-4-yl)-2-naphthoate (111):**

According to the general procedure, a mixture consisting of oxime (0.6 mmol, 231.2 mg), enal (0.2 mmol, 64.9 mg), Fe(acac)<sub>2</sub> (0.02 mmol, 5.0 mg), amine A4 (0.04 mmol, 18.7 mg) and 1,4-dioxane (1 mL)/toluene (1 mL) under a N<sub>2</sub> atmosphere was stirred at 50 °C for 48 h to afford **111**. Colorless oil (35.7 mg, 37% yield, 93:7 er); R<sub>f</sub> = 0.5 (Petroleum ether/Ethyl acetate = 10:1); <sup>1</sup>H NMR (600 MHz, CDCl<sub>3</sub>) δ 8.62 (d, *J* = 4.8 Hz, 1H), 8.51 – 8.44 (m, 1H), 8.09 (d, *J* = 8.7 Hz, 1H), 7.99 (d, *J* = 8.7 Hz, 1H), 7.95 (d, *J* = 8.2 Hz, 1H), 7.58 (t, *J* = 7.3 Hz, 1H), 7.43 – 7.32 (m, 5H), 7.04 (d, *J* = 4.8 Hz, 1H), 4.68 (t, *J* = 6.1 Hz, 1H), 2.55 (d, *J* = 15.9 Hz, 1H), 2.19 (d, *J* = 15.9 Hz, 1H), 1.89 – 1.77 (m, 2H), 1.18 (s, 3H), 1.01 (s, 3H), 0.83 (d, *J* = 6.8 Hz, 3H), 0.81 – 0.78 (m, 6H), 0.72 (d, *J* = 6.7 Hz, 3H); <sup>13</sup>C NMR (151 MHz, CDCl<sub>3</sub>) δ 166.9, 152.2, 147.1, 146.8, 146.3, 138.1, 134.7, 133.3, 131.5, 130.0, 129.6, 128.4, 128.1, 128.0, 127.9, 127.2, 127.0, 126.7, 125.9, 123.8, 123.7, 83.9, 40.0, 33.5, 29.5, 28.8, 28.2, 19.6, 19.4, 17.4, 17.3; HRMS (ESI) *m/z*: [M + H]<sup>+</sup> calcd. for C<sub>33</sub>H<sub>36</sub>NO<sub>2</sub> 478.2741; Found 478.2737.

**HPLC analysis:** DAICEL CHIRALPAK IE, n-hexane/isopropanol = 90/10, flow rate = 1.0 mL/min, λ = 254 nm, t<sub>R</sub> (major) = 6.2 min, t<sub>R</sub> (minor) = 7.2 min, er = 93:7.

[α]<sub>D</sub><sup>25</sup> = -66.37 (c = 0.35, CHCl<sub>3</sub>).

Chiral HPLC spectrum of (rac)-111:

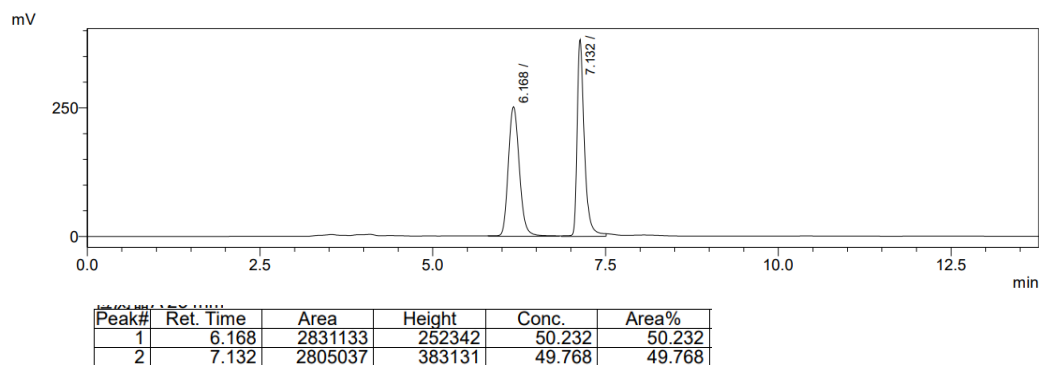

Chiral HPLC spectrum of (S)-**111**:

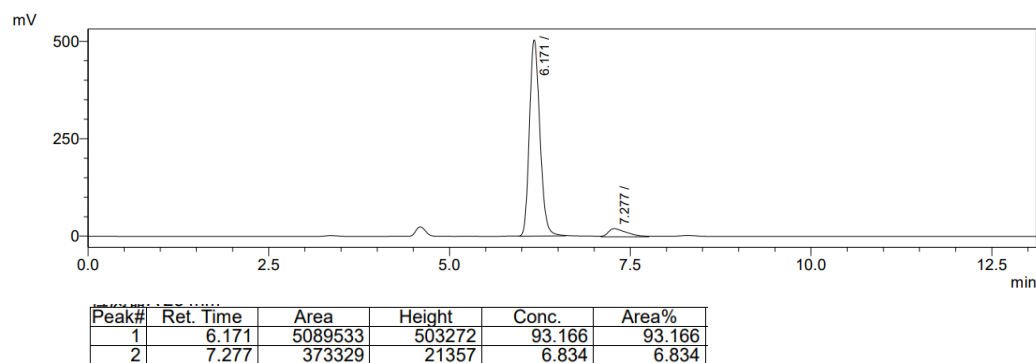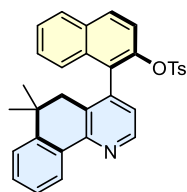

**(S)-1-(6,6-dimethyl-5,6-dihydrobenzo[h]quinolin-4-yl)naphthalen-2-yl methanesulfonate (**112**):**

**4-**

According to the general procedure, a mixture consisting of oxime (0.6 mmol, 231.2 mg), enal (0.2 mmol, 70.4 mg), Fe(acac)<sub>3</sub> (0.02 mmol, 5.0 mg), amine A4 (0.04 mmol, 18.7 mg) and 1,4-dioxane (1 mL)/toluene (1 mL) under a N<sub>2</sub> atmosphere was stirred at 50 °C for 48 h to afford **112**. Colorless oil (41.9 mg, 41% yield, 89:11 er); R<sub>f</sub> = 0.2 (Petroleum ether/Ethyl acetate = 10:1); <sup>1</sup>H NMR (600 MHz, CDCl<sub>3</sub>) δ 8.44 (d, *J* = 7.5 Hz, 1H), 8.42 (d, *J* = 4.5 Hz, 1H), 7.99 (d, *J* = 9.0 Hz, 1H), 7.94 (d, *J* = 8.1 Hz, 1H), 7.74 (d, *J* = 9.0 Hz, 1H), 7.52 (t, *J* = 7.4 Hz, 1H), 7.44 – 7.37 (m, 3H), 7.36 – 7.30 (m, 4H), 7.08 (d, *J* = 7.8 Hz, 2H), 6.69 (d, *J* = 4.5 Hz, 1H), 2.34 (d, *J* = 15.9 Hz, 1H), 2.30 (s, 3H), 2.19 (d, *J* = 15.8 Hz, 1H), 1.13 (s, 3H), 1.03 (s, 3H); <sup>13</sup>C NMR (151 MHz, CDCl<sub>3</sub>) δ 152.5, 146.5, 146.5, 145.3, 144.1, 142.1, 133.1, 133.0, 132.1, 132.1, 130.7, 130.2, 129.8, 129.7, 128.3, 127.9, 127.3, 126.8, 126.5, 125.8, 125.7, 124.7, 123.9, 121.5, 39.4, 33.5, 28.3, 28.0, 21.6; HRMS (ESI) *m/z*: [M + H]<sup>+</sup> calcd. for C<sub>32</sub>H<sub>28</sub>NO<sub>3</sub>S 506.1784; Found 506.1783.

**HPLC analysis:** DAICEL CHIRALPAK AD-H, n-hexane/isopropanol = 90/10, flow rate = 1.0 mL/min, λ = 254 nm, t<sub>R</sub> (major) = 16.7 min, t<sub>R</sub> (minor) = 12.0 min, er = 89:11.

[α]<sub>D</sub><sup>25</sup> = 9.65 (c = 0.31, CHCl<sub>3</sub>).

Chiral HPLC spectrum of (*rac*)-**112**:

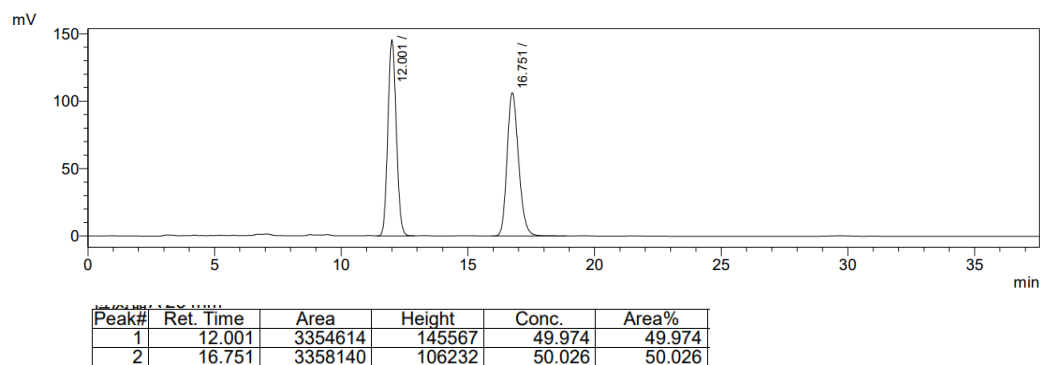

Chiral HPLC spectrum of (S)-**112**:

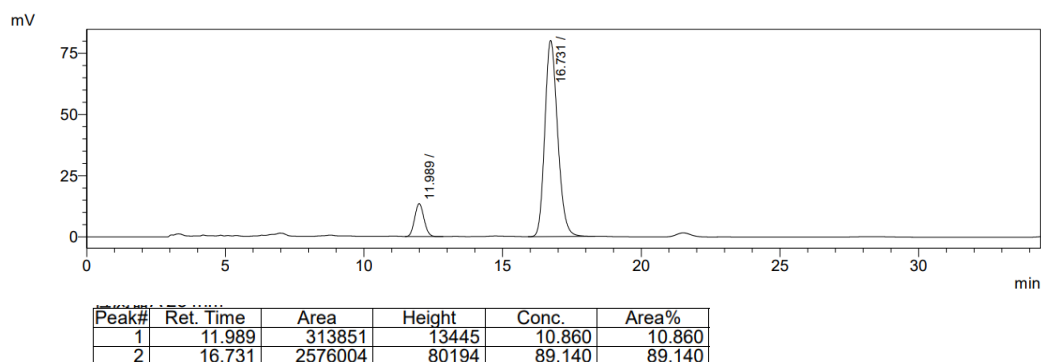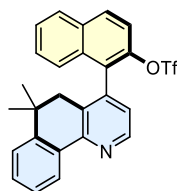

**(S)-1-(6,6-dimethyl-5,6-dihydrobenzo[h]quinolin-4-yl)naphthalen-2-yl trifluoromethanesulfonate (**113**) :**

According to the general procedure, a mixture consisting of oxime (0.6 mmol, 231.2 mg), enal (0.2 mmol, 66.0 mg), Fe(acac)<sub>2</sub> (0.02 mmol, 5.0 mg), amine A4 (0.04 mmol, 18.7 mg) and 1,4-dioxane (1 mL)/toluene (1 mL) under a N<sub>2</sub> atmosphere was stirred at 50 °C for 48 h to afford **113**. White solid (39.7 mg, 41% yield, 87:13 er); R<sub>f</sub> = 0.5 (Petroleum ether/Ethyl acetate = 10:1); Mp = 123–125 °C; <sup>1</sup>H NMR (600 MHz, CDCl<sub>3</sub>) δ 8.70 (d, *J* = 4.8 Hz, 1H), 8.52 – 8.48 (m, 1H), 8.04 (d, *J* = 9.1 Hz, 1H), 7.99 (d, *J* = 8.2 Hz, 1H), 7.60 (t, *J* = 7.4 Hz, 1H), 7.55 (d, *J* = 9.1 Hz, 1H), 7.49 (t, *J* = 7.6 Hz, 1H), 7.43 – 7.38 (m, 3H), 7.38 – 7.35 (m, 1H), 7.16 (d, *J* = 4.9 Hz, 1H), 2.52 (d, *J* = 15.8 Hz, 1H), 2.34 (d, *J* = 15.8 Hz, 1H), 1.19 (s, 3H), 1.12 (s, 3H); <sup>13</sup>C NMR (151 MHz, CDCl<sub>3</sub>) δ 153.0, 147.3, 146.4, 143.7, 140.7, 133.1, 132.5, 132.3, 131.0, 130.3, 123.0, 128.9, 128.5, 128.0, 127.4, 126.9, 126.1, 126.0, 124.6, 123.9, 119.4, 118.3 (q, <sup>1</sup>J<sub>C-F</sub> = 320.6 Hz), 39.8, 33.6, 28.3, 28.2; <sup>19</sup>F NMR (565 MHz, CDCl<sub>3</sub>) δ -74.13; HRMS (ESI) *m/z*: [M + H]<sup>+</sup> calcd. for C<sub>26</sub>H<sub>21</sub>F<sub>3</sub>NO<sub>3</sub>S 484.1189; Found 484.1186.

**HPLC analysis:** DAICEL CHIRALPAK IE, n-hexane/isopropanol = 90/10, flow rate = 1.0 mL/min, λ = 254 nm, t<sub>R</sub> (major) = 5.9 min, t<sub>R</sub> (minor) = 6.8 min, er = 87:13.

[α]<sub>D</sub><sup>25</sup> = -46.59 (c = 0.78, CHCl<sub>3</sub>).

Chiral HPLC spectrum of (*rac*)-**113**:

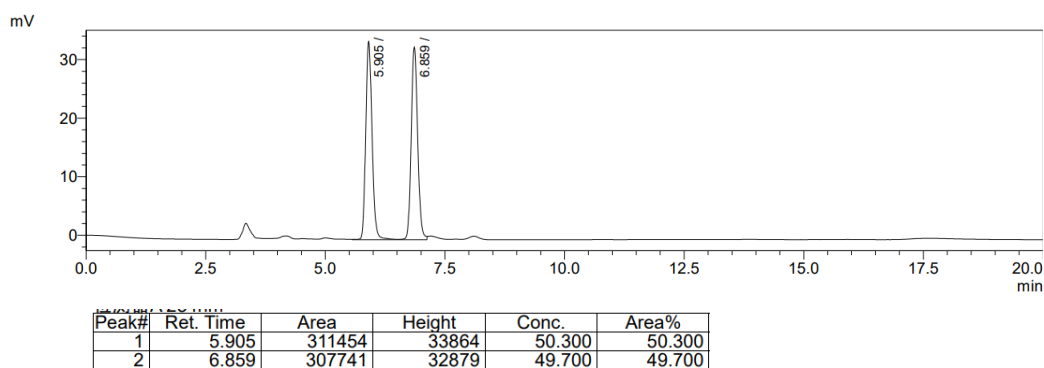

Chiral HPLC spectrum of (S)-**113**:

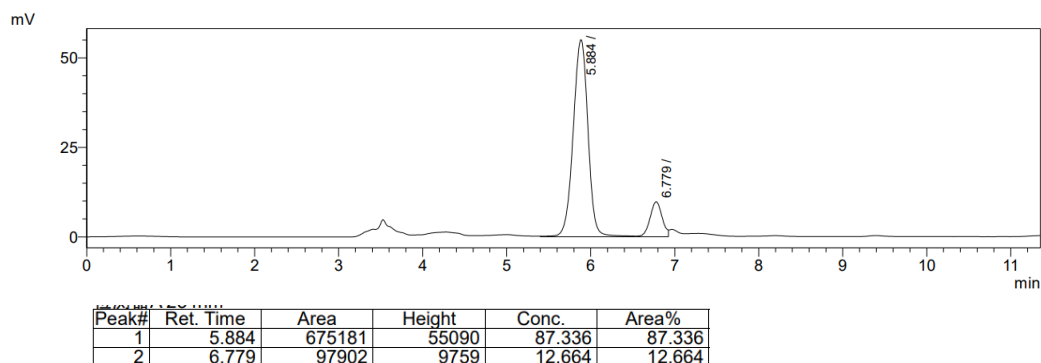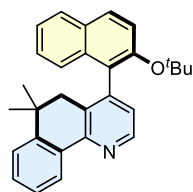

**(S)-4-(2-(tert-butoxy)naphthalen-1-yl)-6,6-dimethyl-5,6-dihydrobenzo[h]quinoline (**114**):**

According to the general procedure, a mixture consisting of oxime (0.6 mmol, 231.2 mg), enal (0.2 mmol, 50.8 mg), Fe(acac)<sub>2</sub> (0.02 mmol, 5.0 mg), amine A4 (0.04 mmol, 18.7 mg) and 1,4-dioxane (1 mL)/toluene (1 mL) under a N<sub>2</sub> atmosphere was stirred at 50 °C for 48 h to afford **114**. Colorless oil (50.0 mg, 61% yield, 80:20 er); R<sub>f</sub> = 0.6 (Petroleum ether/Ethyl acetate = 10:1); <sup>1</sup>H NMR (600 MHz, CDCl<sub>3</sub>) δ 8.62 (d, *J* = 4.4 Hz, 1H), 8.53 – 8.46 (m, 1H), 7.86 (t, *J* = 7.7 Hz, 2H), 7.45 – 7.35 (m, 5H), 7.35 – 7.28 (m, 2H), 7.10 (d, *J* = 4.5 Hz, 1H), 2.66 (d, *J* = 15.8 Hz, 1H), 2.37 (d, *J* = 15.8 Hz, 1H), 1.23 (s, 3H), 1.20 (s, 9H), 1.08 (s, 3H); <sup>13</sup>C NMR (151 MHz, CDCl<sub>3</sub>) δ 152.4, 151.1, 146.8, 146.4, 145.6, 133.6, 132.9, 131.3, 130.1, 129.6, 128.9, 128.0, 127.5, 126.7, 126.5, 125.7, 125.6, 125.3, 124.5, 123.9, 122.9, 79.9, 39.8, 33.7, 29.7, 28.5, 28.3; HRMS (ESI) *m/z*: [M + H]<sup>+</sup> calcd. for C<sub>29</sub>H<sub>30</sub>NO 408.2322; Found 408.2320.

**HPLC analysis:** DAICEL CHIRALPAK AD-H, n-hexane/isopropanol = 90/10, flow rate = 1.0 mL/min, λ = 254 nm, t<sub>R</sub> (major) = 4.4 min, t<sub>R</sub> (minor) = 4.0 min, er = 80:20.

[α]<sub>D</sub><sup>25</sup> = 32.46 (c = 0.50, CHCl<sub>3</sub>).

Chiral HPLC spectrum of (rac)-**114**:

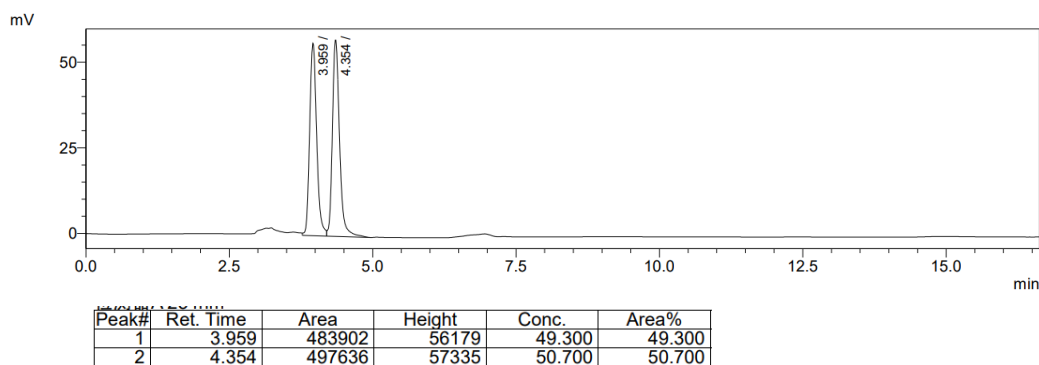

Chiral HPLC spectrum of (S)-114:

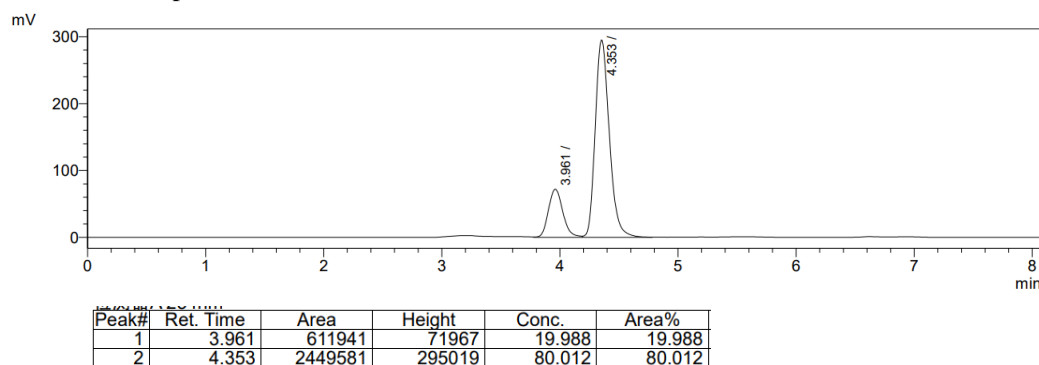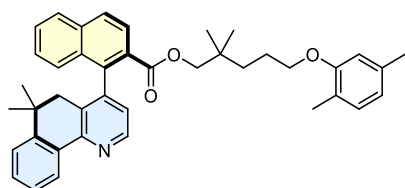

**5-(2,5-dimethylphenoxy)-2,2-dimethylpentyl (S)-1-(6,6-dimethyl-5,6-dihydrobenzo[h]quinolin-4-yl)-2-naphthoate (115)**

According to the general procedure, a mixture consisting of oxime (0.6 mmol, 231.2 mg), enal (0.2 mmol, 88.9 mg), Fe(acac)<sub>2</sub> (0.02 mmol, 5.0 mg), amine A4 (0.04 mmol, 18.7 mg) and 1,4-dioxane (1 mL)/toluene (1 mL) under a N<sub>2</sub> atmosphere was stirred at 50 °C for 48 h to afford **115**. Colorless oil (56.7 mg, 47% yield, 92:8 er); R<sub>f</sub> = 0.5 (Petroleum ether/Ethyl acetate = 10:1); <sup>1</sup>H NMR (600 MHz, CDCl<sub>3</sub>) δ 8.64 (d, *J* = 4.6 Hz, 1H), 8.51 – 8.45 (m, 1H), 8.09 (d, *J* = 8.6 Hz, 1H), 7.98 (d, *J* = 8.7 Hz, 1H), 7.95 (d, *J* = 8.2 Hz, 1H), 7.59 (t, *J* = 7.4 Hz, 1H), 7.43 – 7.39 (m, 1H), 7.38 – 7.31 (m, 4H), 7.06 (d, *J* = 4.5 Hz, 1H), 6.97 (d, *J* = 7.3 Hz, 1H), 6.64 (d, *J* = 7.2 Hz, 1H), 6.58 (s, 1H), 3.92 (d, *J* = 10.3 Hz, 1H), 3.85 – 3.80 (m, 3H), 2.49 (d, *J* = 15.8 Hz, 1H), 2.30 (s, 3H), 2.22 (d, *J* = 15.8 Hz, 1H), 2.12 (s, 3H), 1.73 – 1.66 (m, 2H), 1.37 – 1.31 (m, 2H), 1.16 (s, 3H), 1.04 (s, 3H), 0.86 (s, 3H), 0.85 (s, 3H); <sup>13</sup>C NMR (151 MHz, CDCl<sub>3</sub>) δ 167.1, 157.0, 152.3, 147.0, 146.9, 146.3, 138.2, 136.4, 134.9, 133.3, 131.5, 130.3, 129.8, 129.7, 128.5, 128.2, 128.1, 127.4, 127.2, 127.1, 126.8, 125.9, 123.8, 123.7, 123.5, 120.7, 112.0, 73.5, 68.2, 39.8, 35.3, 33.7, 33.6, 28.6, 28.2, 24.2, 24.1, 21.4, 15.8; HRMS (ESI) *m/z*: [M + H]<sup>+</sup> calcd. for C<sub>41</sub>H<sub>44</sub>NO<sub>3</sub> 598.3316; Found 598.3322.

**HPLC analysis:** DAICEL CHIRALPAK IE, n-hexane/isopropanol = 90/10, flow rate = 1.0 mL/min, λ = 254 nm, t<sub>R</sub> (major) = 8.5 min, t<sub>R</sub> (minor) = 10.1 min, er = 92:8.

[α]<sub>D</sub><sup>25</sup> = -31.53 (c = 0.41, CHCl<sub>3</sub>).

Chiral HPLC spectrum of (*rac*)-**115**:

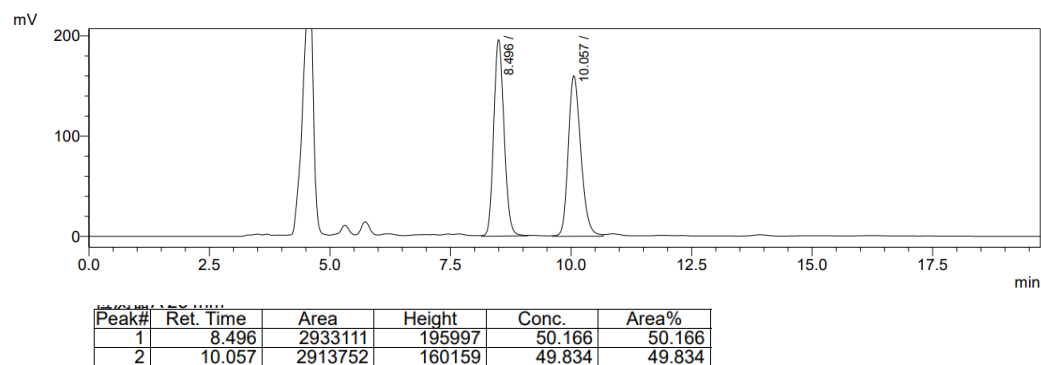

Chiral HPLC spectrum of (*S*)-**115**:

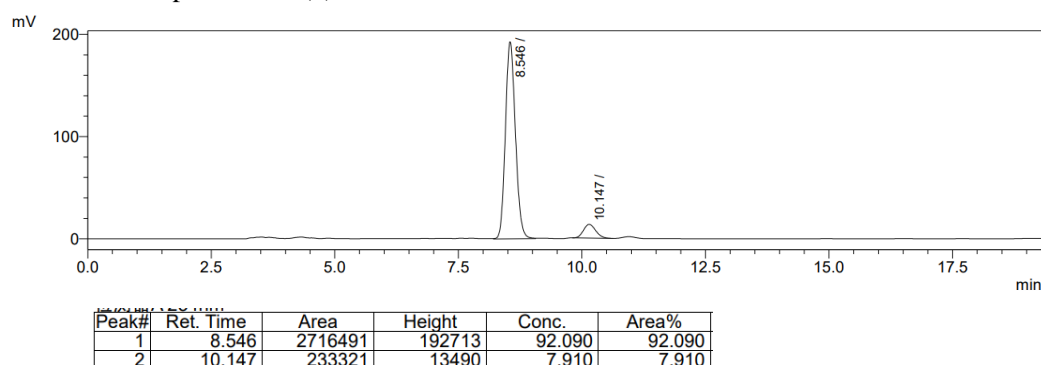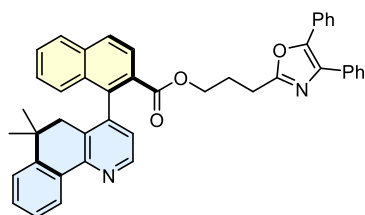

### 3-(4,5-diphenyloxazol-2-yl)propyl (S)-1-(6,6-dimethyl-5,6-dihydrobenzo[h]quinolin-4-yl)-2-naphthoate (**116**)

According to the general procedure, a mixture consisting of oxime (0.6 mmol, 231.2 mg), enal (0.2 mmol, 97.5 mg), Fe(acac)<sub>3</sub> (0.02 mmol, 5.0 mg), amine A4 (0.04 mmol, 18.7 mg) and 1,4-dioxane (1 mL)/toluene (1 mL) under a N<sub>2</sub> atmosphere was stirred at 50 °C for 48 h to afford **116**. Yellow oil (57.7 mg, 45% yield, 91:9 er); R<sub>f</sub> = 0.5 (Petroleum ether/Ethyl acetate = 10:1); <sup>1</sup>H NMR (600 MHz, CDCl<sub>3</sub>) δ 8.64 (d, *J* = 4.8 Hz, 1H), 8.50 – 8.44 (m, 1H), 8.07 (d, *J* = 8.7 Hz, 1H), 7.93 (d, *J* = 8.5 Hz, 2H), 7.61 – 7.56 (m, 3H), 7.55 – 7.50 (m, 2H), 7.40 (t, *J* = 7.6 Hz, 1H), 7.36 – 7.29 (m, 10H), 7.03 (d, *J* = 4.8 Hz, 1H), 4.28 – 4.23 (m, 1H), 4.20 – 4.15 (m, 1H), 2.76 (t, *J* = 7.4 Hz, 2H), 2.46 (d, *J* = 15.8 Hz, 1H), 2.24 (d, *J* = 15.8 Hz, 1H), 2.06 – 1.94 (m, 2H), 1.14 (s, 3H), 1.05 (s, 3H); <sup>13</sup>C NMR (151 MHz, CDCl<sub>3</sub>) δ 167.0, 162.3, 152.2, 146.9, 146.3, 145.3, 138.3, 135.1, 135.0, 133.2, 132.5, 131.4, 129.8, 129.7, 129.0, 128.6, 128.5, 128.4, 128.2, 128.1, 128.0, 127.9, 127.2, 127.1, 127.1, 126.8, 126.5, 126.0, 125.9, 123.8, 123.6, 64.4, 39.9, 33.6, 28.5, 28.2, 25.8, 25.0; HRMS (ESI) *m/z*: [M + Na]<sup>+</sup> calcd. for C<sub>44</sub>H<sub>36</sub>N<sub>2</sub>NaO<sub>3</sub> 663.2618; Found 663.2624.

**HPLC analysis:** DAICEL CHIRALPAK AD-H, n-hexane/isopropanol = 80/20, flow rate = 1.0 mL/min, λ = 254 nm, t<sub>R</sub> (major) = 7.9 min, t<sub>R</sub> (minor) = 6.7 min, er = 91:9.

[α]<sub>D</sub><sup>25</sup> = -17.68 (c = 0.58, CHCl<sub>3</sub>).



Chiral HPLC spectrum of (*rac*)-**116**:

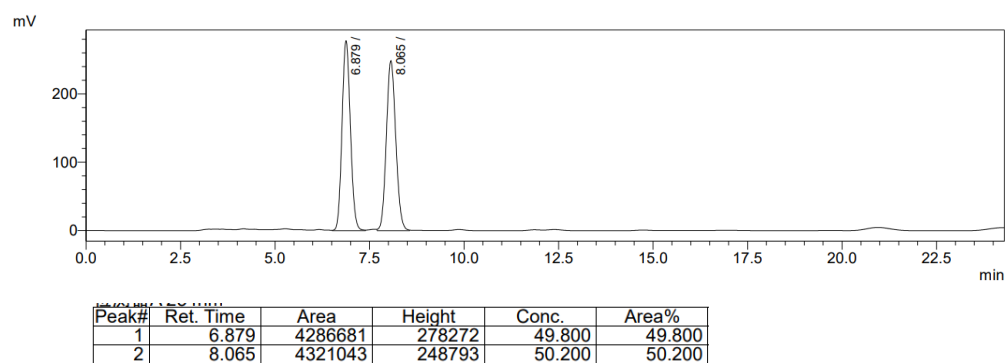

Chiral HPLC spectrum of (*S*)-**116**:

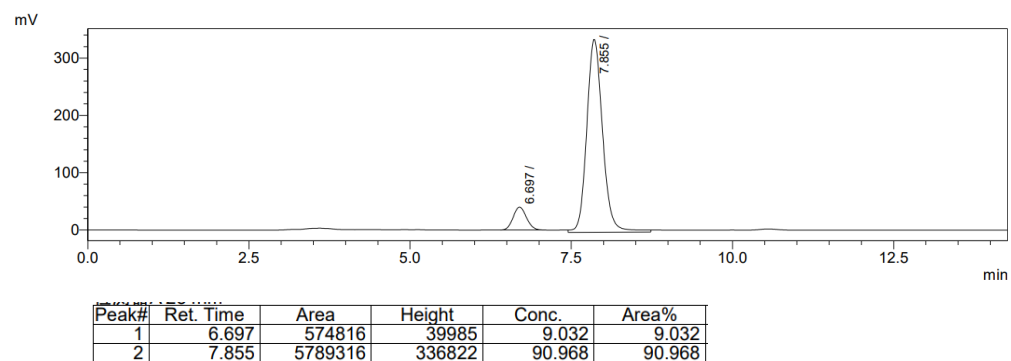

## Synthetic Transformations

### Scale-up Reaction

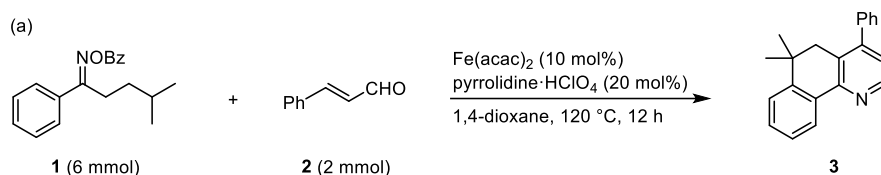

To an oven-dried 100 mL Schlenk tube equipped with a magnetic stir bar was added **1** (6.0 mmol, 3 equiv), **2** (2.0 mmol, 1.0 equiv). The tube was introduced in a nitrogen-filled glove box, and  $\text{Fe(acac)}_3$  (10 mol%) and pyrrolidine· $\text{HClO}_4$  (20 mol%) were added. The tube was then sealed with a Teflon-lined screw cap and taken out from the glove box. Then anhydrous 1,4-dioxane (20 mL) was added to the Schlenk tube through the rubber septum using syringes, and then the septum was replaced by a Teflon screwcap under nitrogen flow. Then the reaction mixture was stirred at 120 °C for 12 h. After the reaction was complete, the reaction was quenched with an aqueous solution of saturated  $\text{NaHCO}_3$ . Then the mixture was extracted with ethyl acetate. The combined organic layers were washed with brine and dried over  $\text{Na}_2\text{SO}_4$ . Then the organic layers were filtered, and concentrated in vacuo. The residue was purified by flash silica gel chromatography (eluent: Petroleum ether /Ethyl acetate = 60:1) to afford the desired product **3** as a white solid in 61% yield (347.7 mg).

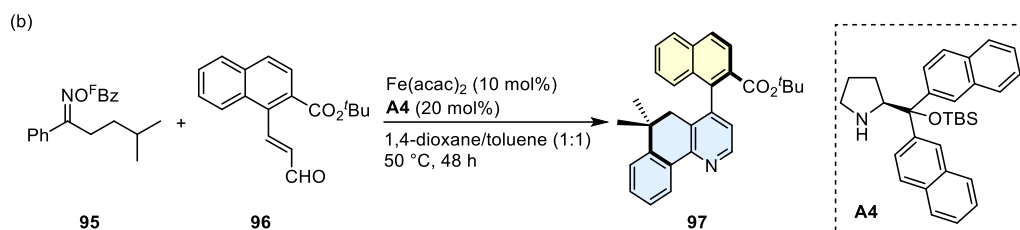

To an oven-dried 100 mL Schlenk tube equipped with a magnetic stir bar was added **95** (6.0 mmol, 3 equiv), **96** (2.0 mmol, 1.0 equiv). The tube was introduced in a nitrogen-filled glove box, and  $\text{Fe(acac)}_3$  (10 mol%) and **A4** (20 mol%) were added. The tube was then sealed with a Teflon-lined screw cap and taken out from the glove box. Anhydrous 1,4-dioxane (10 mL) and Toluene (10 mL) were added to the Schlenk tube through the rubber septum using syringes, and then the septum was replaced by a Teflon screwcap under nitrogen flow. Then the reaction mixture was stirred at 50 °C for 48 h. After the reaction was complete, the reaction was quenched with an aqueous solution of saturated  $\text{NaHCO}_3$ . Then the mixture was extracted with ethyl acetate. The combined organic layers were washed with brine and dried over anhydrous  $\text{Na}_2\text{SO}_4$ . Then the organic layers were filtered, and concentrated in vacuo. The residue was purified by flash silica gel chromatography (eluent: Petroleum ether /Ethyl acetate = 40:1) to afford the desired product **97** as a colorless oil in 51% yield (444.3 mg) with 93:7 er.

**HPLC analysis:** DAICEL CHIRALPAK AD-H, n-hexane/isopropanol = 90/10, flow rate = 1.0 mL/min,  $\lambda$  = 254 nm,  $t_R$  (major) = 5.9 min,  $t_R$  (minor) = 5.4 min, er = 93:7.

Chiral HPLC spectrum of (*rac*)-**97** (scale-up reaction):

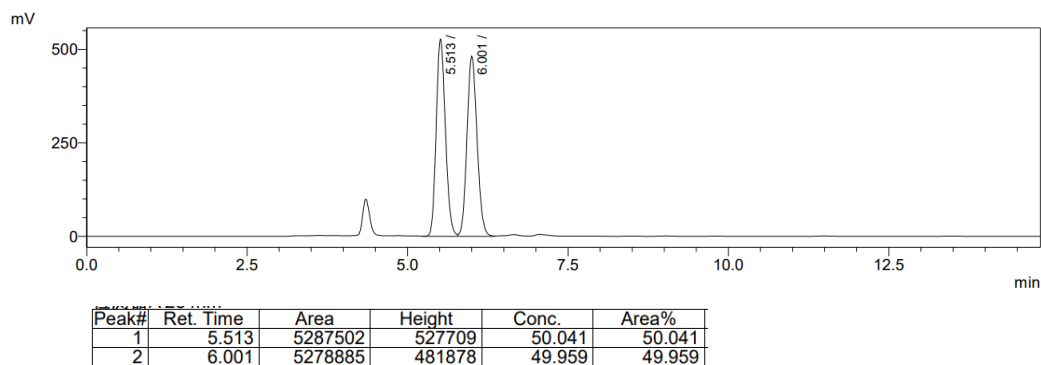

Chiral HPLC spectrum of (*S*)-**97** (scale-up reaction):

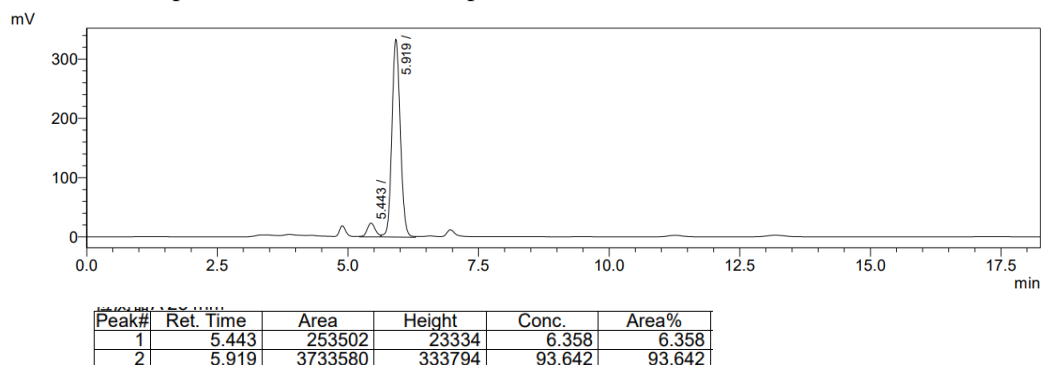

## Synthetic Transformations of pyridines

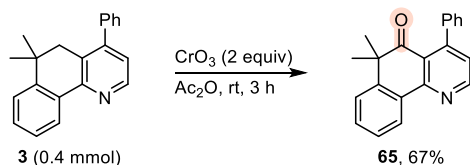

A 10 mL oven-dried Schlenk tube was charged with **3** (114.1mg, 0.4 mmol),  $\text{CrO}_3$  (80.0 mg, 0.8 mmol, 2 equiv), and 3 mL  $\text{Ac}_2\text{O}$ . Then the mixture was stirred for 3 h at room temperature. After completion, the reaction was quenched with an aqueous solution of saturated  $\text{NaHCO}_3$ . Then the aqueous layers were extracted with ethyl acetate. The combined organic layers were washed with brine, dried over  $\text{Na}_2\text{SO}_4$ , filtered, and concentrated. The residue was isolated by flash silica gel chromatography to give the product **65** in 67 % yield (80.5 mg).<sup>20</sup>

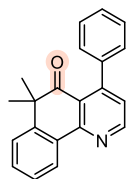

### 6,6-dimethyl-4-phenylbenzo[h]quinolin-5(6H)-one (**65**):

White solid (80.5 mg, 67% yield);  $R_f$  = 0.5 (Petroleum ether/Ethyl acetate = 10:1); Mp = 176 – 177 °C;  $^1\text{H NMR}$  (600 MHz,  $\text{CDCl}_3$ )  $\delta$  8.80 (d,  $J$  = 4.9 Hz, 1H), 8.69 – 8.65 (m, 1H), 7.50 – 7.41 (m, 6H), 7.30 – 7.26 (m, 2H), 7.21 (d,  $J$  = 4.9 Hz, 1H), 1.57 (s, 6H);  $^{13}\text{C NMR}$  (151 MHz,  $\text{CDCl}_3$ )  $\delta$  203.5, 155.0, 152.4, 151.4, 144.4, 139.3, 130.9, 130.7, 128.4, 128.1, 127.5, 127.3, 126.6, 125.4, 125.1, 124.2, 48.8, 25.5; **HRMS** (ESI)  $m/z$ :  $[\text{M} + \text{H}]^+$  calcd. for  $\text{C}_{21}\text{H}_{18}\text{NO}$  300.1383; Found 300.1382.

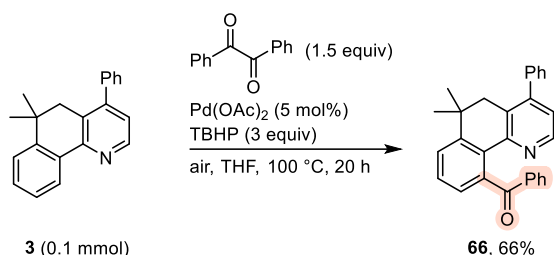

Under air atmosphere, a sealable reaction tube (10 mL) equipped with a magnetic stirrer bar was charged with **3** (28.5 mg, 0.1 mmol), Pd(OAc)<sub>2</sub> (1.1 mg, 5 mol%), α-diphenylketone (31.5 mg, 0.15 mmol, 1.5 equiv), TBHP (27.0 mg, 0.3 mmol, 3 equiv) and THF (1.0 mL). The rubber septum was then replaced by a Teflon-coated screw cap, and the reaction vessel was placed in an oil bath at 100 °C for 20 h. After the reaction was completed, it was cooled to room temperature and diluted with ethyl acetate. The resulting solution was directly filtered through a pad of silica gel using a sintered glass funnel, and concentrated under reduced pressure. The residue was purified by flash chromatography on silica gel to afford **66** in 66% yield (26.0 mg).<sup>21</sup>

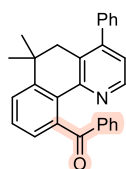

**(6,6-dimethyl-4-phenyl-5,6-dihydrobenzo[h]quinolin-10-yl)(phenyl)methanone (66):**

White solid (26.0 mg, 66% yield); *R*<sub>f</sub> = 0.5 (Petroleum ether/Ethyl acetate = 10:1); Mp = 179 – 180 °C; <sup>1</sup>H NMR (600 MHz, CDCl<sub>3</sub>) δ 8.08 (d, *J* = 4.9 Hz, 1H), 7.80 – 7.76 (m, 2H), 7.51 (dd, *J* = 7.7, 1.0 Hz, 1H), 7.48 – 7.43 (m, 3H), 7.43 – 7.38 (m, 2H), 7.34 – 7.29 (m, 3H), 7.29 – 7.26 (m, 2H), 6.89 (d, *J* = 4.9 Hz, 1H), 2.85 (s, 2H), 1.25 (s, 6H); <sup>13</sup>C NMR (151 MHz, CDCl<sub>3</sub>) δ 198.6, 150.6, 148.6, 147.0, 145.6, 139.4, 138.9, 138.6, 132.5, 131.6, 129.2, 128.9, 128.8, 128.4, 128.4, 128.0, 126.5, 125.0, 123.1, 39.7, 34.5, 28.1; HRMS (ESI) *m/z*: [M + H]<sup>+</sup> calcd. for C<sub>28</sub>H<sub>24</sub>NO 390.1852; Found 390.1851.

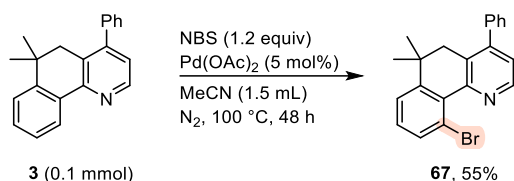

**3** (28.5mg, 0.1 mmol), Pd(OAc)<sub>2</sub> (1.1 mg, 5 mol%), and NBS (21.2 mg, 0.12 mmol, 1.2 equiv) were dissolved in MeCN (1.5 mL) in a 10 mL tube. The tube was evacuated and backfilled with nitrogen (3 times) and sealed with a Teflon screw cap. The mixture was heated at 100 °C for 48 h. After cooling to room temperature, the solvent was evaporated and the residue was purified by flash chromatography on silica gel to afford **67** in 55% yield (20.2 mg).<sup>22</sup>

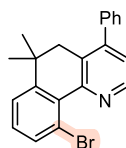

**10-bromo-6,6-dimethyl-4-phenyl-5,6-dihydrobenzo[h]quinoline (67):**

Colorless oil (20.2 mg, 55% yield);  $R_f = 0.6$  (Petroleum ether/Ethyl acetate = 10:1);  $^1\text{H NMR}$  (600 MHz,  $\text{CDCl}_3$ )  $\delta$  8.66 (d,  $J = 4.9$  Hz, 1H), 7.65 (d,  $J = 7.9$  Hz, 1H), 7.48 (t,  $J = 7.3$  Hz, 2H), 7.44 (t,  $J = 7.3$  Hz, 1H), 7.36 (d,  $J = 7.0$  Hz, 2H), 7.32 (d,  $J = 7.6$  Hz, 1H), 7.20 – 7.15 (m, 2H), 2.74 (s, 2H), 1.11 (s, 6H);  $^{13}\text{C NMR}$  (151 MHz,  $\text{CDCl}_3$ )  $\delta$  152.4, 150.0, 148.6, 146.0, 138.7, 133.8, 133.0, 129.9, 129.8, 129.0, 128.6, 128.1, 123.4, 123.1, 121.1, 40.4, 35.3, 27.5; **HRMS** (ESI)  $m/z$ :  $[\text{M} + \text{H}]^+$  calcd. for  $\text{C}_{21}\text{H}_{19}\text{BrN}$  364.0695; Found 364.0693.

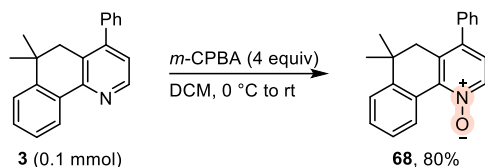

To a solution of **3** (28.5 mg, 0.1 mmol) in DCM (2.0 mL) was added *m*-chloroperoxybenzoic acid (69.0 mg, 0.4 mmol, 4 equiv) at 0 °C. The reaction mixture was stirred at 25 °C for 12 hours. After the reaction was complete (monitored by TLC), the reaction mixture was then quenched with saturated  $\text{Na}_2\text{CO}_3$  aqueous solution and extracted with DCM. The combined organic layers were washed with brine, dried over  $\text{Na}_2\text{SO}_4$ , and filtrated. The solvent was removed under reduced pressure and the residue was purified by flash chromatography on silica gel (DCM/MeOH = 60:1) to afford **68** in 80% yield (24.2 mg).<sup>23</sup>

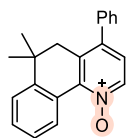

#### 6,6-dimethyl-4-phenyl-5,6-dihydrobenzo[h]quinoline 1-oxide (**68**):

White solid (24.2 mg, 80% yield);  $R_f = 0.5$  (DCM/MeOH = 30:1);  $\text{Mp} = 139 - 140$  °C;  $^1\text{H NMR}$  (600 MHz,  $\text{CDCl}_3$ )  $\delta$  9.44 (d,  $J = 7.7$  Hz, 1H), 8.29 (d,  $J = 6.6$  Hz, 1H), 7.49 (dd,  $J = 10.6, 3.9$  Hz, 2H), 7.46 – 7.36 (m, 4H), 7.31 (d,  $J = 7.0$  Hz, 2H), 7.08 (d,  $J = 6.7$  Hz, 1H), 2.71 (s, 2H), 1.19 (s, 6H);  $^{13}\text{C NMR}$  (151 MHz,  $\text{CDCl}_3$ )  $\delta$  146.9, 143.1, 139.0, 138.9, 137.9, 133.5, 130.5, 128.9, 128.8, 128.7, 128.2, 126.7, 125.8, 124.2, 123.2, 41.3, 33.9, 27.5; **HRMS** (ESI)  $m/z$ :  $[\text{M} + \text{H}]^+$  calcd. for  $\text{C}_{21}\text{H}_{20}\text{NO}$  302.1539; Found 302.1537.

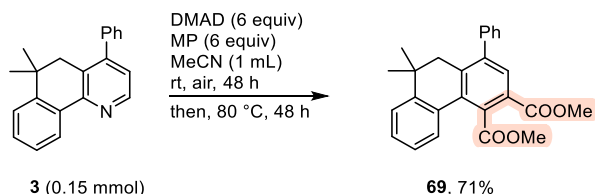

A 10 mL oven-dried Schlenk tube equipped with a magnetic stirring bar was charged with a pyridine substrate (28.5 mg, 0.15 mmol), methyl pyruvate (91.8 mg, 0.9 mmol, 6 equiv) and MeCN (1 mL, 0.15 M). Dimethyl acetylenedicarboxylate (127.9 mg, 0.9 mmol, 6 equiv) was then added to the stirred reaction mixture. The reaction mixture was allowed to stir at room temperature for 48 h. The reaction mixture was then stirred at 80 °C for 48 h under an air atmosphere. After the reaction was complete, as monitored by TLC, the solvent was removed in a rotary evaporator under reduced pressure and the residue was subjected to flash column chromatography over silica gel to give the corresponding product **69** in 71% yield (42.8 mg).<sup>24</sup>

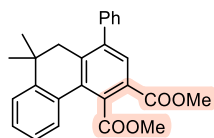

**dimethyl 9,9-dimethyl-1-phenyl-9,10-dihydrophenanthrene-3,4-dicarboxylate (69):**

White solid (42.8 mg, 71% yield);  $R_f = 0.4$  (Petroleum ether/Ethyl acetate = 10:1);  $M_p = 185 - 186^\circ\text{C}$ ;  $^1\text{H NMR}$  (600 MHz,  $\text{CDCl}_3$ )  $\delta$  7.86 (s, 1H), 7.67 (d,  $J = 7.8$  Hz, 1H), 7.46 (t,  $J = 7.3$  Hz, 2H), 7.44 – 7.37 (m, 2H), 7.35 – 7.30 (m, 3H), 7.28 – 7.24 (m, 1H), 3.91 (s, 3H), 3.88 (s, 3H), 2.67 (s, 2H), 1.14 (s, 6H);  $^{13}\text{C NMR}$  (151 MHz,  $\text{CDCl}_3$ )  $\delta$  170.8, 166.8, 146.5, 142.5, 140.5, 139.9, 134.2, 132.2, 131.3, 130.2, 129.2, 128.7, 128.5, 127.7, 127.4, 126.7, 126.2, 123.7, 52.6, 52.6, 42.4, 34.0, 27.0. **HRMS** (ESI)  $m/z$ :  $[\text{M} + \text{H}]^+$  calcd. for  $\text{C}_{26}\text{H}_{25}\text{O}_4$  401.1747; Found 401.1747.

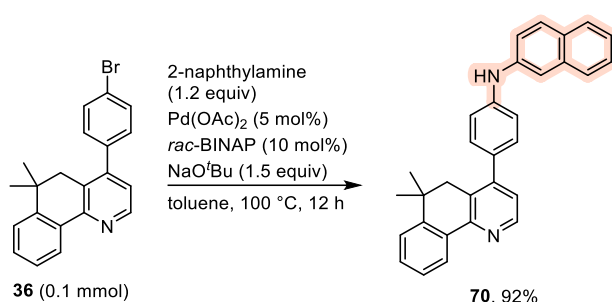

To a 10 mL Schlenk tube, **36** (36.4 mg, 0.1 mmol),  $\text{Pd(OAc)}_2$  (1.1 mg, 5 mol%), *rac*-BINAP (6.2 mg, 10 mol%),  $\text{NaO}^t\text{Bu}$  (14.4 mg, 0.15 mmol, 1.5 equiv), 2-naphthylamine (17.2 mg, 0.12 mmol, 1.2 equiv), and toluene (1 mL) were added. The tube was charged with nitrogen and the mixture was then heated at  $100^\circ\text{C}$  for 12 h. After cooling to room temperature, the reaction mixture was diluted with ethyl acetate and filtered through a short pad of silica. The final product was purified by flash chromatography to afford **70** in 92% yield (39.3 mg).<sup>25</sup>

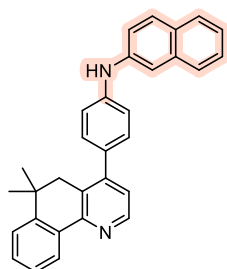

***N*-(4-(6,6-dimethyl-5,6-dihydrobenzo[h]quinolin-4-yl)phenyl)naphthalen-2-amine (70) :**

White solid (39.3 mg, 92% yield);  $R_f = 0.5$  (Petroleum ether/Ethyl acetate = 5:1);  $M_p = 132 - 133^\circ\text{C}$ ;  $^1\text{H NMR}$  (400 MHz,  $\text{CDCl}_3$ )  $\delta$  8.57 (d,  $J = 4.9$  Hz, 1H), 8.43 (d,  $J = 3.7$  Hz, 1H), 7.79 (t,  $J = 8.6$  Hz, 2H), 7.71 (d,  $J = 8.2$  Hz, 1H), 7.56 (d,  $J = 1.7$  Hz, 1H), 7.44 (t,  $J = 7.5$  Hz, 1H), 7.41 – 7.37 (m, 3H), 7.36 (d,  $J = 7.5$  Hz, 1H), 7.34 – 7.27 (m, 3H), 7.24 (d,  $J = 8.5$  Hz, 2H), 7.15 (d,  $J = 5.0$  Hz, 1H), 6.07 (s, 1H), 2.90 (s, 2H), 1.25 (s, 6H);  $^{13}\text{C NMR}$  (101 MHz,  $\text{CDCl}_3$ )  $\delta$  152.8, 148.9, 147.0, 146.3, 143.2, 140.0, 134.6, 133.6, 131.2, 130.1, 129.6, 129.3, 128.1, 127.7, 126.8, 126.6, 126.6, 125.9, 123.9, 123.7, 123.4, 120.5, 117.0, 113.1, 40.3, 33.9, 28.2; **HRMS** (ESI)  $m/z$ :  $[\text{M} + \text{H}]^+$  calcd. for  $\text{C}_{31}\text{H}_{27}\text{N}_2$  427.2169; Found 427.2168.

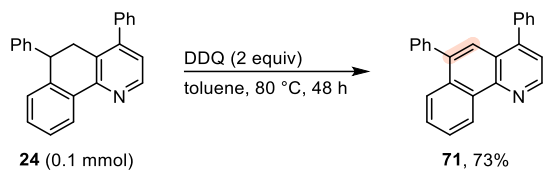

A 10 mL oven-dried reaction tube was charged with **24** (33.3 mg, 0.1 mmol), DDQ (45.4 mg, 0.2 mmol, 2 equiv) and 1 mL toluene. Then the mixture was stirred at 80 °C for 48 h. The reaction mixture was purified by silica gel column chromatography to afford **71** in 73 % yield (24.3 mg).<sup>20</sup>

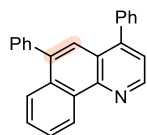

**4,6-diphenylbenzo[*h*]quinoline (71) :**

White solid (24.3 mg, 73% yield);  $R_f = 0.6$  (Petroleum ether/Ethyl acetate = 10:1); Mp = 173 – 174 °C; **<sup>1</sup>H NMR** (400 MHz, CDCl<sub>3</sub>)  $\delta$  9.50 (d,  $J = 8.2$  Hz, 1H), 9.03 (d,  $J = 4.5$  Hz, 1H), 7.88 (d,  $J = 8.2$  Hz, 1H), 7.80 – 7.72 (m, 2H), 7.64 (t,  $J = 7.2$  Hz, 1H), 7.58 – 7.42 (m, 11H); **<sup>13</sup>C NMR** (101 MHz, CDCl<sub>3</sub>)  $\delta$  148.4, 148.2, 146.6, 140.5, 139.8, 138.4, 132.4, 132.0, 130.0, 129.6, 128.7, 128.3, 128.3, 128.2, 127.5, 127.0, 126.2, 125.2, 124.0, 123.4, 122.7; **HRMS** (ESI)  $m/z$ : [M + H]<sup>+</sup> calcd. for C<sub>25</sub>H<sub>18</sub>N 332.1434; Found 332.1432.

## Synthetic Transformations of Axially Chiral Heterobiaryls

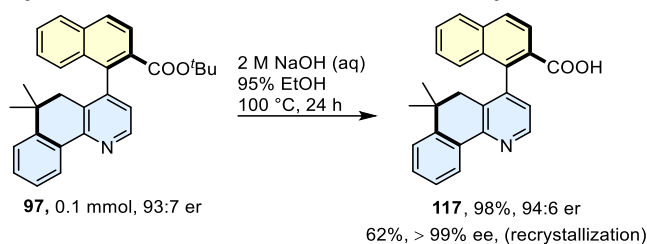

A 50 mL round-bottomed flask, equipped with a magnetic stirring bar, is charged with 10 mL 95% ethanol and NaOH (800 mg, 2 M) and **97** (87.0 mg, 0.2 mmol, 93:7 er). The flask is fitted with a reflux condenser, and the mixture was heated at 100 °C for 24 h. After the reaction was complete (monitored by TLC), the reaction mixture was then quenched with saturated NH<sub>4</sub>Cl aqueous solution and extracted with ethyl acetate. The organic layers were combined, dried over Na<sub>2</sub>SO<sub>4</sub>, and filtered. Then the solvent was removed under reduced pressure and the residue was purified by flash chromatography on silica gel (eluent: DCM/MeOH = 30/1) to afford **117** in 98% yield with 94:6 er, or recrystallized from ethyl acetate to afford **117** in 62% yield with > 99% ee.

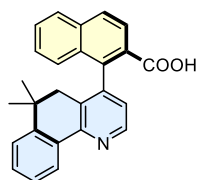

### (S)-1-(6,6-dimethyl-5,6-dihydrobenzo[h]quinolin-4-yl)-2-naphthoic acid (**117**) :

White solid (74.4 mg, 98% yield, 94:6 er; 47.3 mg, 62% yield after recrystallization from ethyl acetate, > 99% ee); *R*<sub>f</sub> = 0.3 (DCM/MeOH = 20:1); Mp = 179 – 181 °C; <sup>1</sup>H NMR (600 MHz, DMSO) δ 12.88 (s, 1H), 8.60 (d, *J* = 4.5 Hz, 1H), 8.42 (d, *J* = 6.9 Hz, 1H), 8.12 (d, *J* = 8.6 Hz, 1H), 8.09 (d, *J* = 8.1 Hz, 1H), 8.04 (d, *J* = 8.6 Hz, 1H), 7.64 (t, *J* = 7.3 Hz, 1H), 7.49 (t, *J* = 7.5 Hz, 1H), 7.43 – 7.35 (m, 3H), 7.27 (d, *J* = 8.4 Hz, 1H), 7.11 (d, *J* = 4.6 Hz, 1H), 2.39 (d, *J* = 15.7 Hz, 1H), 2.21 (d, *J* = 15.8 Hz, 1H), 1.08 (s, 3H), 1.03 (s, 3H); <sup>13</sup>C NMR (151 MHz, DMSO) δ 168.4, 151.3, 147.4, 147.3, 146.4, 137.5, 134.7, 133.3, 131.3, 130.1, 129.5, 128.9, 128.8, 128.4, 127.8, 127.0, 126.8, 126.3, 125.7, 124.5, 124.2, 33.6, 28.7, 28.7; HRMS (ESI) *m/z*: [M + H]<sup>+</sup> calcd. for C<sub>26</sub>H<sub>22</sub>NO<sub>2</sub> 380.1645; Found 380.1646.

**HPLC analysis:** DAICEL CHIRALPAK AD-H, n-hexane/isopropanol = 60/40, flow rate = 1.0 mL/min, λ = 254 nm, *t*<sub>R</sub> (major) = 5.2 min, *t*<sub>R</sub> (minor) = 6.7 min, er = 94:6; DAICEL CHIRALPAK AD-H, n-hexane/isopropanol = 60/40, flow rate = 1.0 mL/min, λ = 254 nm, *t*<sub>R</sub> (major) = 5.3 min, *t*<sub>R</sub> (minor) = 6.8 min, ee > 99%.

[α]<sub>D</sub><sup>25</sup> = -102.11 (c = 0.47, DMF, ee > 99%).

Chiral HPLC spectrum of (*rac*)-**117**:

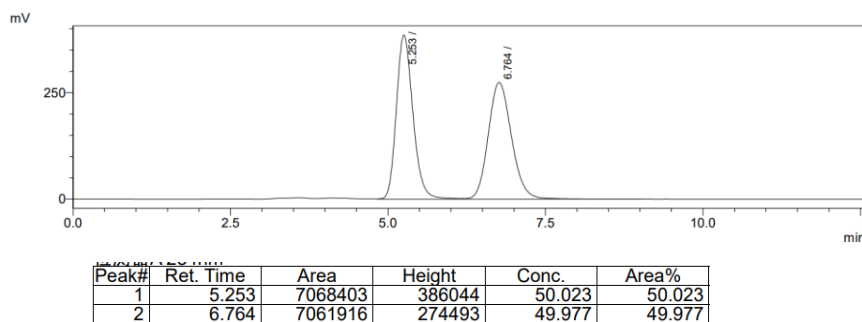



Chiral HPLC spectrum of (*S*)-**117**:

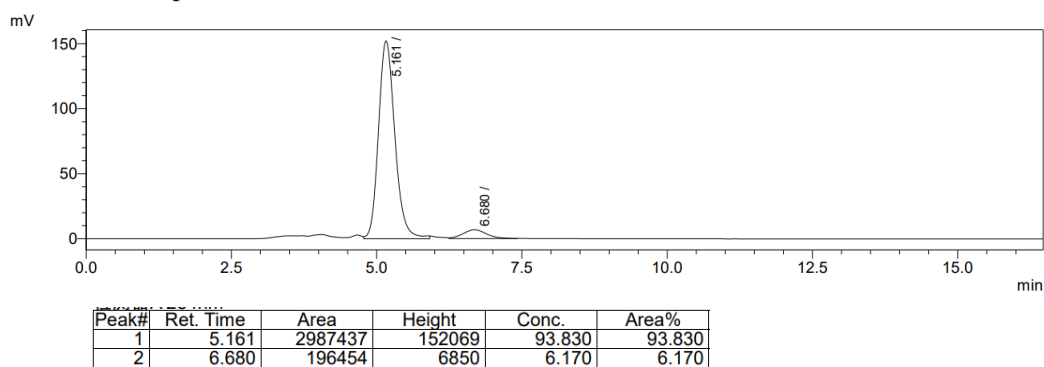

Chiral HPLC spectrum of (*S*)-**117** after recrystallization:

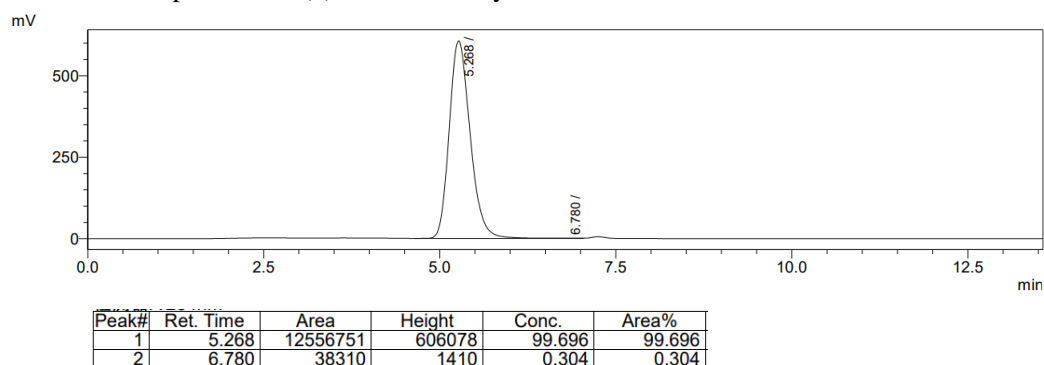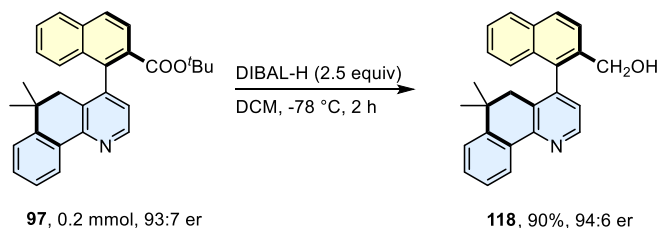

The axially chiral ester **97** (87.0 mg, 0.2 mmol) was dissolved in anhydrous DCM (5 mL) in a 50 mL flask. Then, the resulting solution was cooled down to -78 °C. DIBAL-H solution (1.0 M in hexanes, 0.5 mL, 0.5 mmol, 2.5 equiv) was added dropwise. The reaction was stirred at the same temperature for 2 h. After the reaction was complete (monitored by TLC), and then point water (2 mL) was added. The solution was allowed to warm up to room temperature and a NaOH solution (10% in water, 2 mL) was added followed by water (10 mL). The mixture was stirred vigorously for an hour until the aqueous phase changed clear, and extracted with DCM (10 mL × 3). The organic layers were combined, dried over Na<sub>2</sub>SO<sub>4</sub>, and filtered. Then the solvent was removed under reduced pressure and the residue was purified by flash chromatography on silica gel (eluent: petroleum ether/Ethyl acetate = 5/1) to afford **118** in 90% yield with 94:6 er.<sup>12</sup>

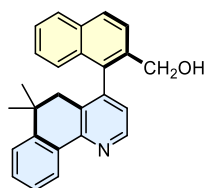

(*S*)-(1-(6,6-dimethyl-5,6-dihydrobenzo[h]quinolin-4-yl)naphthalen-2-yl)methanol (**118**) :

Colorless oil (65.8 mg, 90% yield, 94:6 er); *R*<sub>f</sub> = 0.2 (Petroleum ether/Ethyl acetate = 3:1); <sup>1</sup>H

**NMR** (600 MHz, CDCl<sub>3</sub>)  $\delta$  8.66 (d,  $J$  = 4.5 Hz, 1H), 8.51 – 8.47 (m, 1H), 7.99 (d,  $J$  = 8.5 Hz, 1H), 7.93 (d,  $J$  = 8.2 Hz, 1H), 7.77 (d,  $J$  = 8.5 Hz, 1H), 7.50 (t,  $J$  = 7.4 Hz, 1H), 7.43 – 7.33 (m, 4H), 7.25 – 7.23 (m, 1H), 7.07 (d,  $J$  = 4.5 Hz, 1H), 4.57 – 4.49 (m, 2H), 2.40 (d,  $J$  = 15.9 Hz, 1H), 2.33 (d,  $J$  = 15.7 Hz, 1H), 1.71 (s, 1H), 1.14 (s, 3H), 1.10 (s, 3H); **<sup>13</sup>C NMR** (151 MHz, CDCl<sub>3</sub>)  $\delta$  152.8, 147.4, 146.4, 146.0, 135.4, 133.8, 133.1, 132.9, 131.4, 130.2, 129.9, 128.7, 128.2, 126.9, 126.6, 126.1, 125.9, 125.8, 125.6, 124.2, 123.9, 62.9, 39.7, 33.6, 28.2; **HRMS** (ESI)  $m/z$ : [M + H]<sup>+</sup> calcd. for C<sub>26</sub>H<sub>24</sub>NO 366.1852; Found 366.1857.

**HPLC analysis:** DAICEL CHIRALPAK AD-H, n-hexane/isopropanol = 90/10, flow rate = 1.0 mL/min,  $\lambda$  = 254 nm,  $t_R$  (major) = 26.1 min,  $t_R$  (minor) = 16.0 min, er = 94:6.

$[\alpha]_D^{25}$  = -157.81 ( $c$  = 0.19, CHCl<sub>3</sub>).

Chiral HPLC spectrum of (*rac*)-**118**:

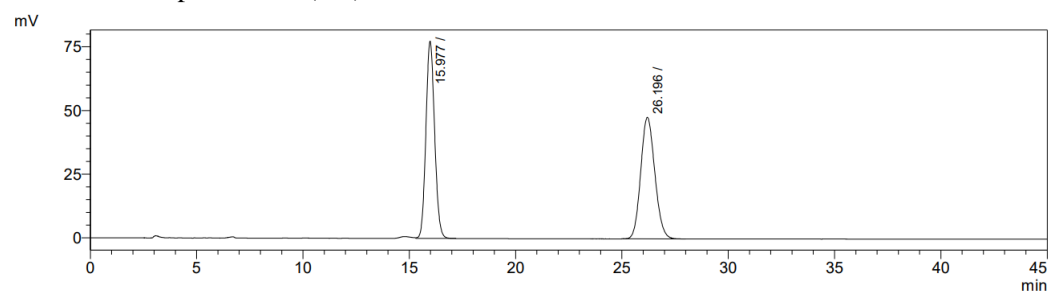

| Peak# | Ret. Time | Area    | Height | Conc.  | Area%  |
|-------|-----------|---------|--------|--------|--------|
| 1     | 15.977    | 2203295 | 77520  | 50.021 | 50.021 |
| 2     | 26.196    | 2201436 | 47727  | 49.979 | 49.979 |

Chiral HPLC spectrum of (*S*)-**118**:

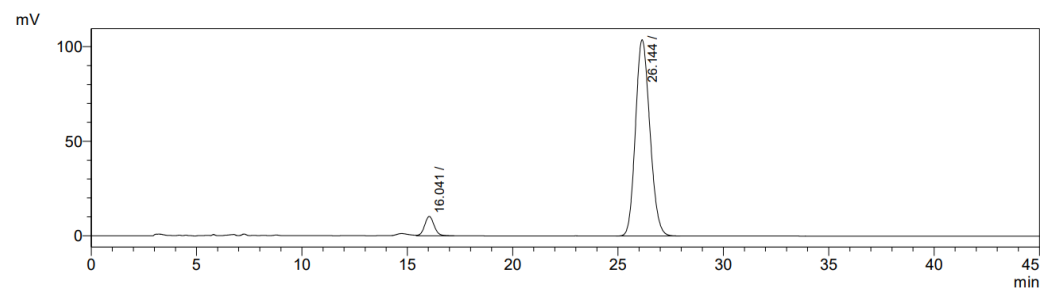

| Peak# | Ret. Time | Area    | Height | Conc.  | Area%  |
|-------|-----------|---------|--------|--------|--------|
| 1     | 16.041    | 319263  | 10251  | 6.079  | 6.079  |
| 2     | 26.144    | 4932392 | 103788 | 93.921 | 93.921 |

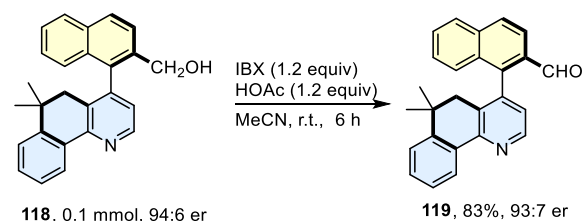

A suspension of the axially chiral alcohol **118** (36.5 mg, 0.1 mmol), IBX (33.6 mg, 0.12 mmol, 1.2 equiv), and acetic acid (7.2 mg, 0.12 mmol, 1.2 equiv) in acetonitrile (2 mL) was stirred at room temperature for 6 h. The reaction progress was monitored by a TLC plate. After completion of the reaction, excess sodium bicarbonate was added to the mixture. The resulting mixture was passed through a short path of silica gel using ethyl acetate as the eluent. Then the solvent was removed under reduced pressure and the residue was purified by flash chromatography on silica gel (eluent: petroleum ether/Ethyl acetate = 30/1) to afford **119** in 83% yield with 93:7 er.<sup>13</sup>

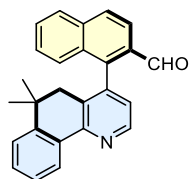

**(S)-1-(6,6-dimethyl-5,6-dihydrobenzo[h]quinolin-4-yl)-2-naphthaldehyde (119) :**

White solid (30.2 mg, 83% yield, 93:7 er);  $R_f = 0.5$  (Petroleum ether/Ethyl acetate = 10:1);  $M_p = 217 - 218\text{ }^\circ\text{C}$ ;  $^1\text{H NMR}$  (600 MHz,  $\text{CDCl}_3$ )  $\delta$  9.88 (s, 1H), 8.71 (d,  $J = 4.8$  Hz, 1H), 8.54 – 8.48 (m, 1H), 8.12 (d,  $J = 8.6$  Hz, 1H), 8.03 (d,  $J = 8.7$  Hz, 1H), 7.99 (d,  $J = 8.2$  Hz, 1H), 7.69 – 7.64 (m, 1H), 7.50 – 7.44 (m, 2H), 7.44 – 7.39 (m, 2H), 7.38 – 7.33 (m, 1H), 7.17 (d,  $J = 4.8$  Hz, 1H), 2.41 (d,  $J = 15.8$  Hz, 1H), 2.35 (d,  $J = 15.8$  Hz, 1H), 1.12 (d,  $J = 8.1$  Hz, 6H);  $^{13}\text{C NMR}$  (151 MHz,  $\text{CDCl}_3$ )  $\delta$  191.3, 152.9, 147.2, 146.2, 143.2, 142.7, 136.2, 132.9, 131.3, 130.8, 130.4, 130.2, 129.3, 129.2, 128.6, 127.5, 127.0, 126.9, 126.0, 124.5, 124.0, 122.2, 40.1, 33.7, 28.2, 28.1; **HRMS** (ESI)  $m/z$ :  $[M + H]^+$  calcd. for  $\text{C}_{26}\text{H}_{22}\text{NO}$  364.1696; Found 364.1694.

**HPLC analysis:** DAICEL CHIRALPAK IE, n-hexane/isopropanol = 80/20, flow rate = 1.0 mL/min,  $\lambda = 254$  nm,  $t_R$  (major) = 12.8 min,  $t_R$  (minor) = 11.8 min, er = 93:7.

$[\alpha]_D^{25} = -102.65$  ( $c = 0.28$ ,  $\text{CHCl}_3$ ).

Chiral HPLC spectrum of (*rac*)-**119**:

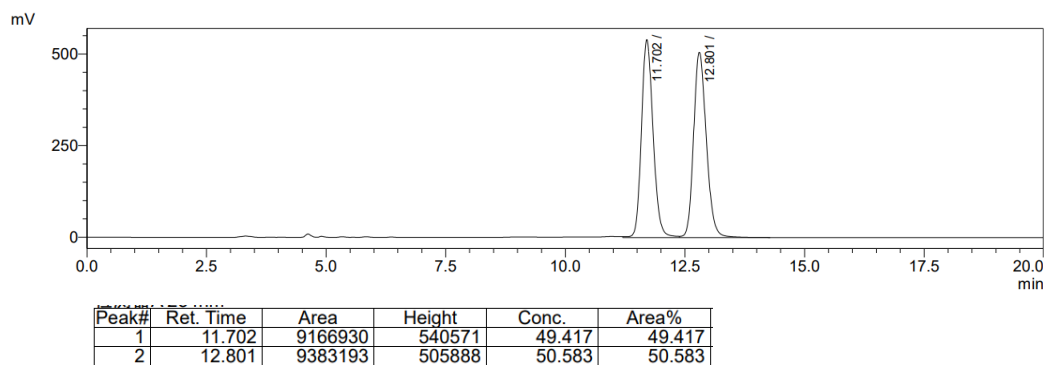

Chiral HPLC spectrum of (*S*)-**119**:

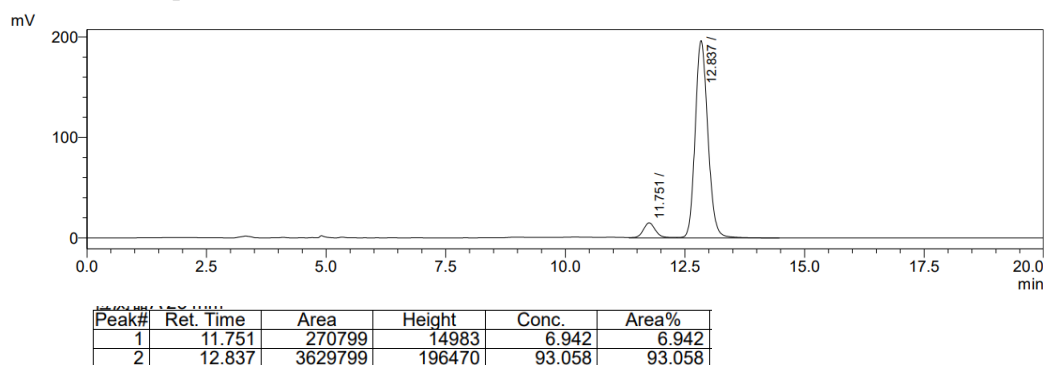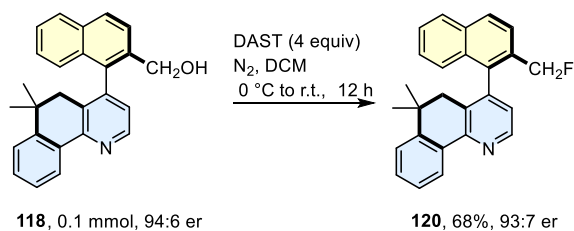

A 50 mL round-bottom flask was charged with **118** (36.5 mg, 0.1 mmol), purged with nitrogen,

and dry DCM (5 mL) was added. The solution was cooled to 0 °C and DAST (52  $\mu$ L, 0.4 mmol, 4 equiv) was added dropwise. The reaction was gradually warmed to room temperature for 12 h, then quenched with saturated aqueous NaHCO<sub>3</sub> (10 mL) and extracted with DCM (5 mL  $\times$  3). The combined organic phases were dried over Na<sub>2</sub>SO<sub>4</sub> and concentrated in vacuum. The residue was purified by silica gel column chromatography to afford **120** in 68% yield with 93:7 er.<sup>26</sup>

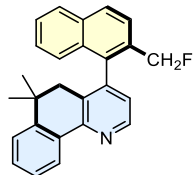

**(S)-4-(2-(fluoromethyl)naphthalen-1-yl)-6,6-dimethyl-5,6-dihydrobenzo[h]quinoline (**120**):**

White solid (25.0 mg, 68% yield, 93:7 er);  $R_f$  = 0.6 (Petroleum ether/Ethyl acetate = 10:1); Mp = 216 – 217 °C; <sup>1</sup>H NMR (600 MHz, CDCl<sub>3</sub>)  $\delta$  8.67 (d,  $J$  = 4.7 Hz, 1H), 8.53 – 8.48 (m, 1H), 8.00 (d,  $J$  = 8.5 Hz, 1H), 7.94 (d,  $J$  = 8.2 Hz, 1H), 7.71 (d,  $J$  = 8.5 Hz, 1H), 7.53 (t,  $J$  = 7.4 Hz, 1H), 7.44 – 7.37 (m, 3H), 7.37 – 7.34 (m, 1H), 7.29 (d,  $J$  = 8.5 Hz, 1H), 7.07 (d,  $J$  = 4.7 Hz, 1H), 5.27 (q,  $J$  = 10.9 Hz, 1H), 5.19 (q,  $J$  = 11.0 Hz, 1H), 2.39 (d,  $J$  = 15.9 Hz, 1H), 2.33 (d,  $J$  = 15.9 Hz, 1H), 1.13 (s, 3H), 1.11 (s, 3H); <sup>13</sup>C NMR (151 MHz, CDCl<sub>3</sub>)  $\delta$  152.9, 147.4, 146.4, 145.2, 135.3 (d, <sup>3</sup> $J_{C-F}$  = 5.9 Hz), 133.4, 133.1, 131.3, 131.0 (d, <sup>2</sup> $J_{C-F}$  = 16.5 Hz), 130.2, 130.0, 128.8, 128.3, 126.9, 126.8, 126.1, 125.9, 125.8 (d, <sup>3</sup> $J_{C-F}$  = 5.9 Hz), 124.1, 123.9, 82.5 (d, <sup>1</sup> $J_{C-F}$  = 166.4 Hz), 39.6, 33.6, 28.2; <sup>19</sup>F NMR (565 MHz, CDCl<sub>3</sub>)  $\delta$  -206.76; HRMS (ESI)  $m/z$ : [M + H]<sup>+</sup> calcd. for C<sub>26</sub>H<sub>23</sub>FN 368.1809; Found 368.1807.

**HPLC analysis:** DAICEL CHIRALPAK ID, n-hexane/isopropanol = 92/8, flow rate = 0.8 mL/min,  $\lambda$  = 254 nm,  $t_R$  (major) = 7.8 min,  $t_R$  (minor) = 8.4 min, er = 93:7.

$[\alpha]^{25}_D$  = -213.70 ( $c$  = 0.27, CHCl<sub>3</sub>).

Chiral HPLC spectrum of (*rac*)-**120**:

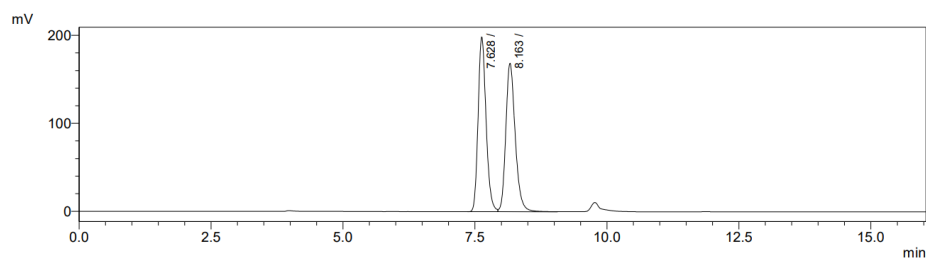

| Peak# | Ret. Time | Area    | Height | Conc.  | Area%  |
|-------|-----------|---------|--------|--------|--------|
| 1     | 7.628     | 2083185 | 198679 | 49.776 | 49.776 |
| 2     | 8.163     | 2101929 | 168817 | 50.224 | 50.224 |

Chiral HPLC spectrum of (*S*)-**120**:

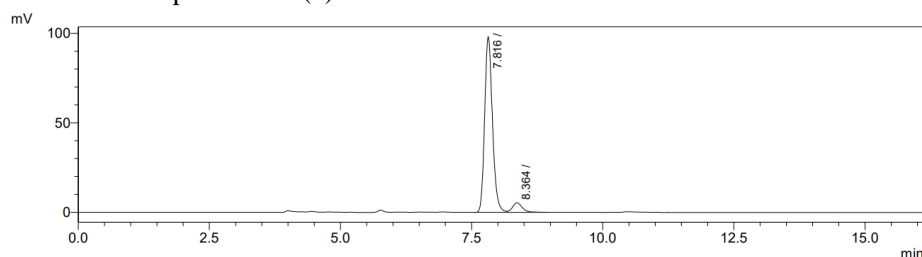

| Peak# | Ret. Time | Area    | Height | Conc.  | Area%  |
|-------|-----------|---------|--------|--------|--------|
| 1     | 7.816     | 1012377 | 98176  | 93.632 | 93.632 |
| 2     | 8.364     | 68850   | 5349   | 6.368  | 6.368  |

## Mechanistic Studies

### (a) Role of the Secondary Amine

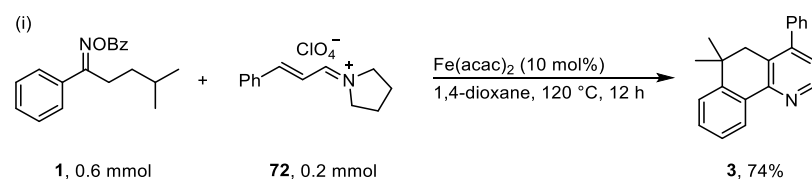

According to the general procedure toward pyridines, a reaction tube charged with **1** (177.2 mg, 0.6 mmol), **72** (57.1 mg, 0.2 mmol), Fe(acac)<sub>2</sub> (5.0 mg, 10 mol%), and 1,4-dioxane (2 mL) under a nitrogen atmosphere was stirred at 120 °C for 12 h to afford **3** in 74% yield (42.0 mg).

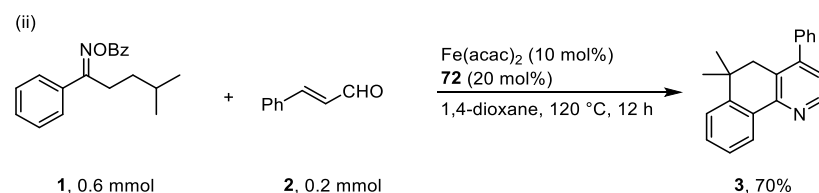

According to the general procedure toward pyridines, a reaction tube charged with **1** (177.2 mg, 0.6 mmol, 3 equiv), **2** (26.4 mg, 0.2 mmol), **72** (11.4 mg, 20 mol%), Fe(acac)<sub>2</sub> (5.0 mg, 10 mol%) and 1,4-dioxane (2 mL) under a nitrogen atmosphere was stirred at 120 °C for 12 h to afford **3** in 70% yield (39.9 mg).

### (b) Experimental Evidence for the $\alpha$ -Carbon Radical

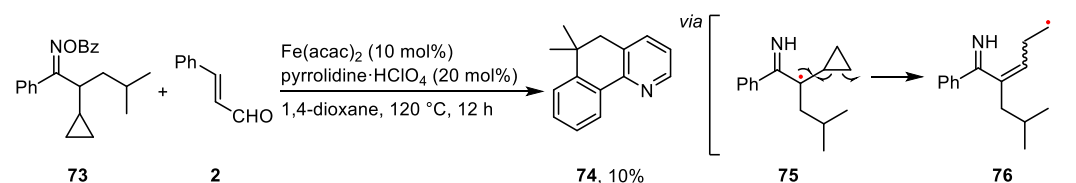

According to the general procedure toward pyridines, a reaction tube charged with **73** (100.6 mg, 0.3 mmol, 3 equiv), **2** (13.2 mg, 0.1 mmol), Fe(acac)<sub>2</sub> (2.5 mg, 10 mol%), pyrrolidine·HClO<sub>4</sub> (3.4 mg, 20 mol%) and 1,4-dioxane (1 mL) under a nitrogen atmosphere was stirred at 120 °C for 12 h to afford **74** in 10% yield (6.2 mg).

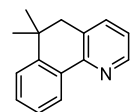

#### 6,6-dimethyl-5,6-dihydrobenzo[h]quinoline (**74**):

Colorless oil (6.2 mg, 10% yield);  $R_f$  = 0.6 (Petroleum ether/Ethyl acetate = 10:1); <sup>1</sup>H NMR (600 MHz, CDCl<sub>3</sub>)  $\delta$  8.54 (d,  $J$  = 4.0 Hz, 1H), 8.38 – 8.35 (m, 1H), 7.48 (d,  $J$  = 7.4 Hz, 1H), 7.42 – 7.33 (m, 3H), 7.14 (dd,  $J$  = 7.4, 4.8 Hz, 1H), 2.84 (s, 2H), 1.30 (s, 6H); <sup>13</sup>C NMR (151 MHz, CDCl<sub>3</sub>)  $\delta$  152.4, 147.7, 146.3, 136.1, 133.2, 130.7, 129.7, 126.8, 125.4, 124.0, 122.3, 43.1, 33.9, 28.3; HRMS (ESI)  $m/z$ : [M + H]<sup>+</sup> calcd. for C<sub>15</sub>H<sub>16</sub>N 210.1277; Found 210.1277.

### (c) Experimental Evidence for the $\alpha$ -Iminyl Radical Cation

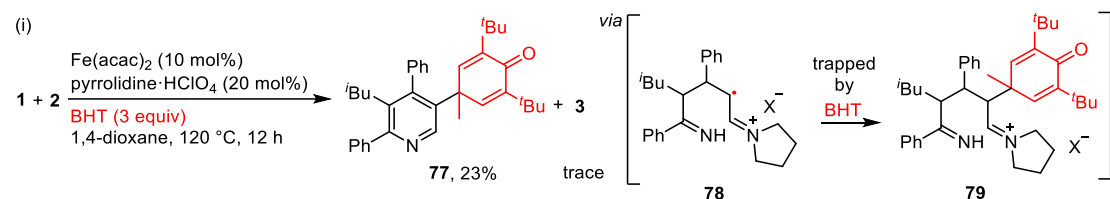

According to the general procedure toward pyridines, a reaction tube charged with **1** (177.2 mg, 0.6 mmol, 3 equiv), **2** (26.4 mg, 0.2 mmol), Fe(acac)<sub>2</sub> (5.0 mg, 10 mol%), pyrrolidine·HClO<sub>4</sub> (6.8 mg, 20 mol%), BHT (132.2 mg, 0.6 mmol, 3 equiv) and 1,4-dioxane (2 mL) under a nitrogen atmosphere was stirred at 120 °C for 12 h to afford **77** in 23% yield (23.2 mg) and a trace amount of **3**.

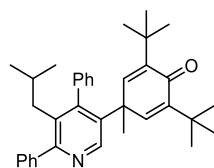

#### 2,6-di-tert-butyl-4-(5-isobutyl-4,6-diphenylpyridin-3-yl)-4-methylcyclohexa-2,5-dien-1-one (**77**):

Colorless oil (23.2 mg, 23% yield);  $R_f$  = 0.45 (Petroleum ether/Ethyl acetate = 10:1); <sup>1</sup>H NMR (600 MHz, CDCl<sub>3</sub>)  $\delta$  8.77 (s, 1H), 7.50 (d,  $J$  = 6.9 Hz, 2H), 7.44 (t,  $J$  = 7.1 Hz, 2H), 7.38 (t,  $J$  = 7.2 Hz, 1H), 7.29 (t,  $J$  = 7.2 Hz, 1H), 7.22 (t,  $J$  = 7.3 Hz, 2H), 7.02 (d,  $J$  = 7.1 Hz, 2H), 6.64 (s, 2H), 2.30 (d,  $J$  = 6.7 Hz, 2H), 1.60 (s, 3H), 1.19 – 1.14 (m, 1H), 1.11 (s, 18H), 0.33 (d,  $J$  = 6.5 Hz, 6H); <sup>13</sup>C NMR (151 MHz, CDCl<sub>3</sub>)  $\delta$  185.1, 159.2, 151.9, 147.2, 144.9, 143.8, 141.5, 137.1, 135.0, 134.0, 130.1, 129.1, 128.4, 128.2, 127.8, 127.4, 43.5, 37.7, 34.5, 30.9, 29.2, 28.8, 22.3; HRMS (ESI)  $m/z$ : [M + H]<sup>+</sup> calcd. for C<sub>36</sub>H<sub>44</sub>NO 506.3417; Found 506.3413.

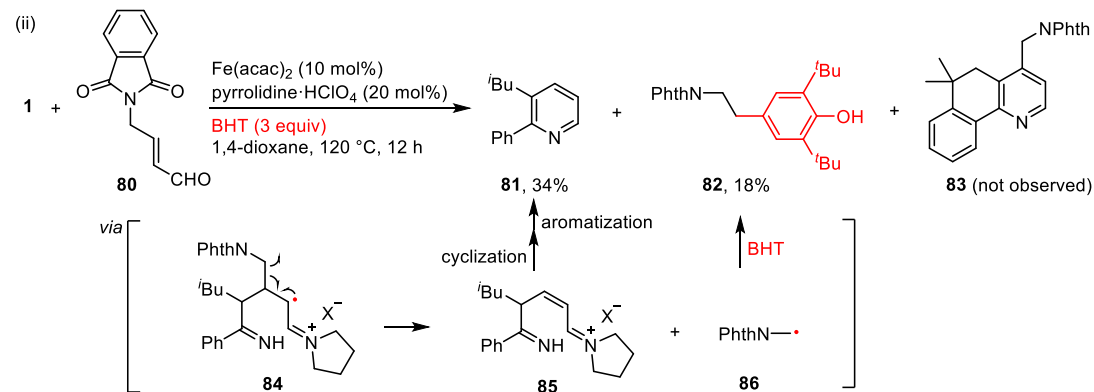

According to the general procedure toward pyridines, a reaction tube charged with **1** (177.2 mg, 0.6 mmol, 3 equiv), **80** (43.0 mg, 0.2 mmol), Fe(acac)<sub>2</sub> (5.0 mg, 10 mol%), pyrrolidine·HClO<sub>4</sub> (6.8 mg, 20 mol%), BHT (132.2 mg, 0.6 mmol, 3 equiv) and 1,4-dioxane (2 mL) under a nitrogen atmosphere was stirred at 120 °C for 12 h to afford **81** in 34% yield (14.4 mg) and **82** in 18% yield (13.7 mg). The compound **83** was not observed.

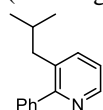

#### 3-isobutyl-2-phenylpyridine (**81**):

Colorless oil (14.4 mg, 34% yield);  $R_f$  = 0.45 (Petroleum ether/Ethyl acetate = 10:1); <sup>1</sup>H NMR

(600 MHz, CDCl<sub>3</sub>)  $\delta$  8.52 (d,  $J$  = 4.4 Hz, 1H), 7.58 (d,  $J$  = 7.7 Hz, 1H), 7.47 – 7.41 (m, 4H), 7.40 – 7.35 (m, 1H), 7.21 (dd,  $J$  = 7.2, 4.8 Hz, 1H), 2.56 (d,  $J$  = 7.2 Hz, 2H), 1.75 – 1.71 (m, 1H), 0.76 (d,  $J$  = 6.5 Hz, 6H); <sup>13</sup>C NMR (151 MHz, CDCl<sub>3</sub>)  $\delta$  159.4, 146.8, 140.9, 138.0, 134.6, 129.0, 128.1, 127.7, 122.0, 41.4, 29.4, 22.3; HRMS (ESI)  $m/z$ : [M + H]<sup>+</sup> calcd. for C<sub>15</sub>H<sub>18</sub>N 212.1434; Found 212.1432.

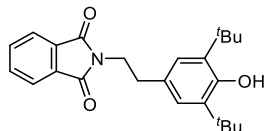

### 2-(3,5-di-tert-butyl-4-hydroxyphenethyl)isoindoline-1,3-dione (**82**) :

White solid (13.7 mg, 18% yield);  $R_f$  = 0.50 (Petroleum ether/Ethyl acetate = 10:1); Mp = 132 – 133 °C; <sup>1</sup>H NMR (600 MHz, CDCl<sub>3</sub>)  $\delta$  7.84 – 7.79 (m, 2H), 7.72 – 7.67 (m, 2H), 6.99 (s, 2H), 5.05 (s, 1H), 3.92 – 3.86 (m, 2H), 2.93 – 2.86 (m, 2H), 1.38 (s, 18H); <sup>13</sup>C NMR (151 MHz, CDCl<sub>3</sub>)  $\delta$  168.2, 152.5, 136.0, 133.8, 132.2, 128.6, 125.4, 123.1, 39.6, 34.3, 34.2, 30.3; HRMS (ESI)  $m/z$ : [M + Na]<sup>+</sup> calcd. for C<sub>24</sub>H<sub>29</sub>NNaO<sub>3</sub> 402.2040; Found 402.2039.

### (d) Experimental Evidence for the $\alpha$ -Iminyl Radical Cation-Triggered 1,5-HAT

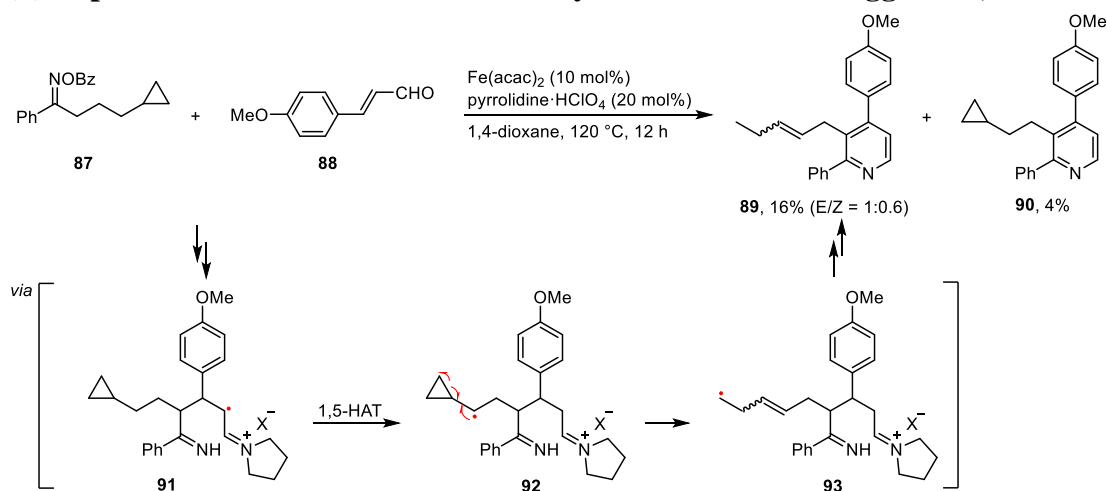

According to the general procedure toward pyridines, a reaction tube charged with **87** (276.6 mg, 0.9 mmol, 3 equiv), **88** (48.7 mg, 0.3 mmol), Fe(acac)<sub>2</sub> (7.6 mg, 10 mol%), pyrrolidine·HClO<sub>4</sub> (10.3 mg, 20 mol%) and 1,4-dioxane (3 mL) under a nitrogen atmosphere was stirred at 120 °C for 12 h to afford a mixture of **89** and **90** in 20% total yield (20.0 mg). Based on <sup>1</sup>H NMR spectra data of the mixture, it can be concluded that the yield of **89** was *ca.* 16% and the E/Z was 1:0.6.

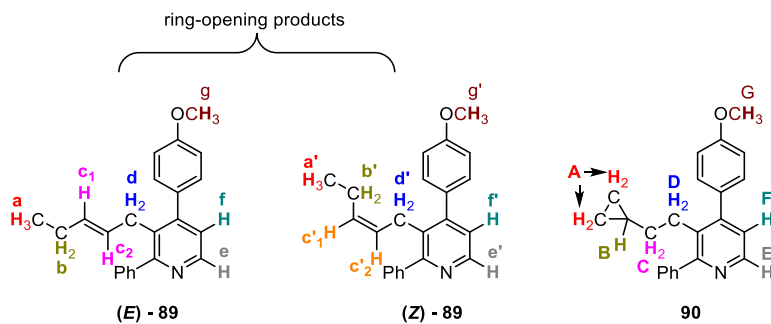

The mixture ((E) - **89** : (Z) - **89** : **90** = 1 : 0.6 : 0.35)

**89** or **90**, [M+H]<sup>+</sup> : calcd. 330.1852, found 330.1851

The mixture was given as a colorless oil (20.0 mg, 20% yield);  $R_f = 0.25$  (Petroleum ether/Ethyl acetate = 10:1);  $^1\text{H}$  NMR (600 MHz,  $\text{CDCl}_3$ )  $\delta$  8.53 (d,  $J = 4.9$  Hz, 0.98H (e)),  $\delta$  8.52 (d,  $J = 4.9$  Hz, 0.62H (e')), 8.48 (d,  $J = 4.9$  Hz, 0.35H, E), 7.49 – 7.46 (m, 4.00H), 7.45 – 7.35 (m, 6.94H), 7.30 – 7.26 (m, 3.78H), 7.12 (d,  $J = 4.8$  Hz, 1H (f), 0.6H (f')), 7.08 (d,  $J = 4.9$  Hz, 0.36H, F), 7.00 – 6.94 (m, 4.00H), 5.15 (dt,  $J = 15.3, 5.8$  Hz, 1.00H, C<sub>2</sub>), 5.11 – 5.03 (m, 1.24H, C'<sub>1</sub> & C'<sub>2</sub>), 4.87 (dt,  $J = 15.3, 6.5$  Hz, 1.00H, C<sub>1</sub>), 3.87 (s, 1.05H, G, OCH<sub>3</sub>), 3.86 (s, 3.00H (g), 1.80H (g'), OCH<sub>3</sub>), 3.39 (d,  $J = 5.4$  Hz, 1.20H, d'), 3.30 (d,  $J = 5.2$  Hz, 2.00H, d), 2.78 – 2.75 (m, 0.72H, D), 1.86 – 1.80 (m, 2.19H, b), 1.54 – 1.48 (m, 1.34H, b'), 1.01 – 0.97 (m, 0.82H, C), 0.81 (t,  $J = 7.4$  Hz, 3.00H, a), 0.68 (t,  $J = 7.5$  Hz, 1.80H, a'), 0.29 – 0.24 (m, 0.40H, B), 0.12 – 0.08 (m, 0.71H, A), -0.48 – -0.53 (m, 0.70H, A); HRMS (ESI)  $m/z$ :  $[\text{M} + \text{H}]^+$  calcd. for  $\text{C}_{23}\text{H}_{24}\text{NO}$  330.1852; Found 330.1851.

**$^1\text{H}$  NMR Spectrum for the mixture of 89 and 90 (600 MHz,  $\text{CDCl}_3$ ) :**

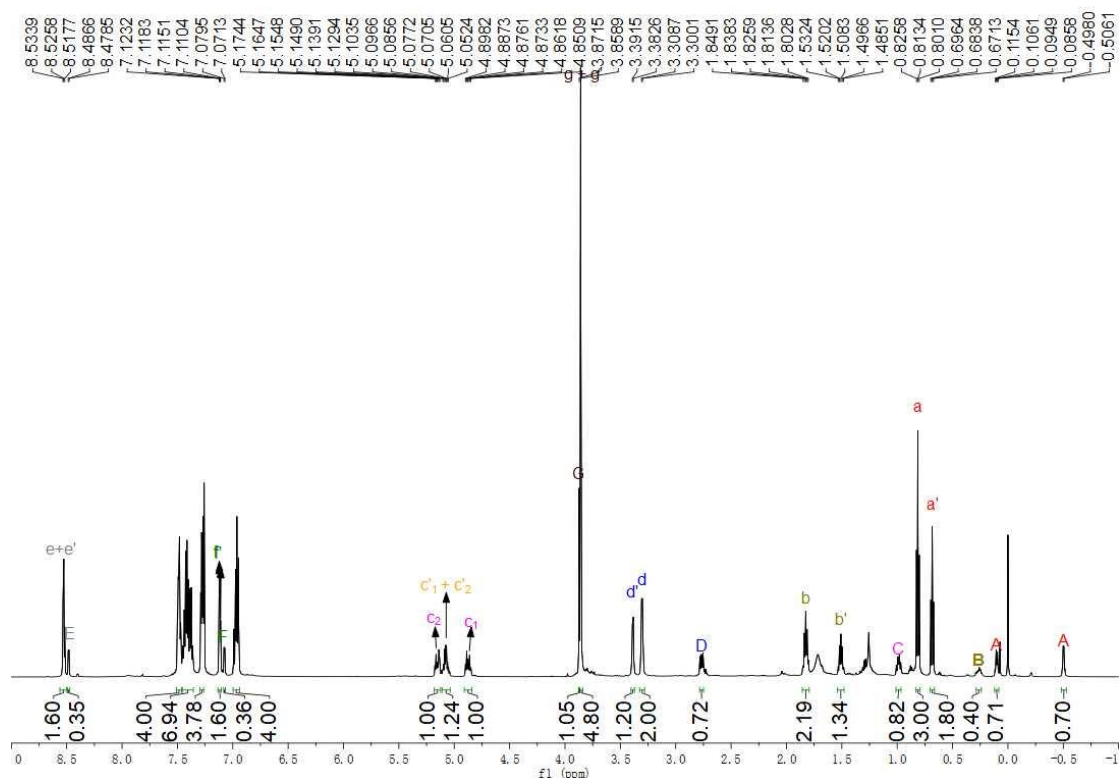



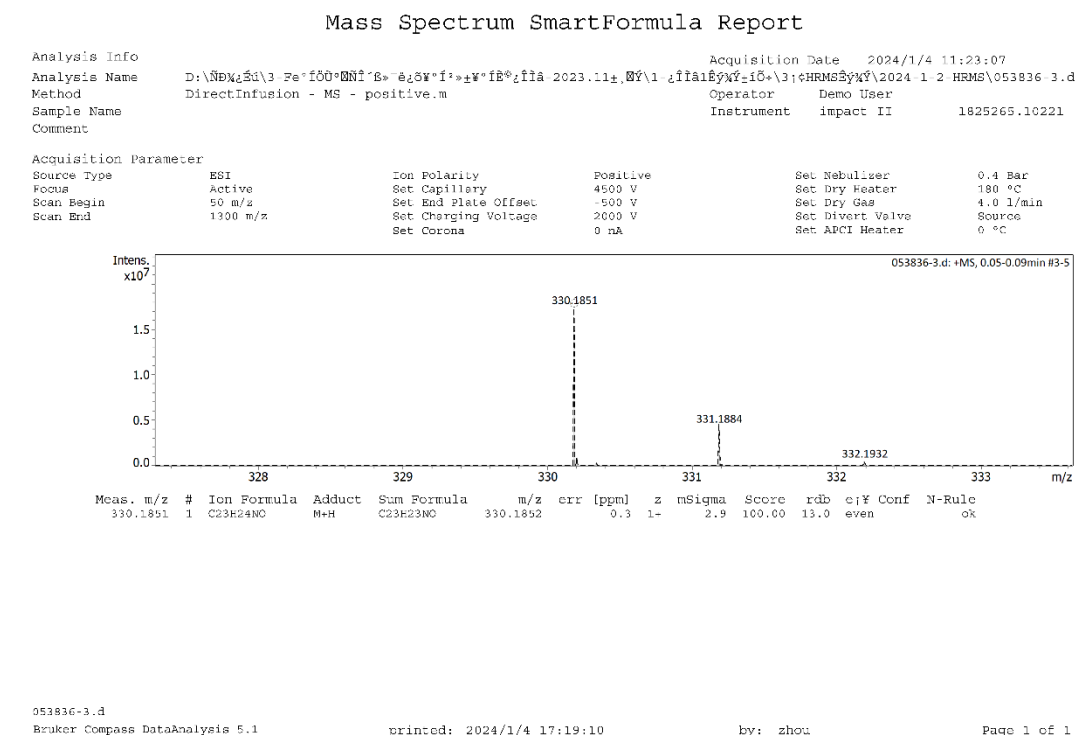

**(e) Exclusion of A Route to the Pyridine via A Condensation of A Ketone, An Enal and An Ammonia.**

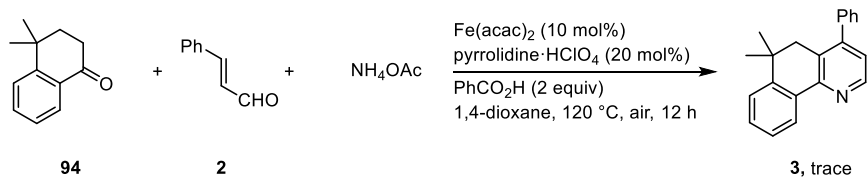

A reaction tube charged with **94** (52.2 mg, 0.3 mmol, 3 equiv), **2** (13.2 mg, 0.1 mmol), Fe(acac)<sub>3</sub> (2.5 mg, 10 mol%), pyrrolidine·HClO<sub>4</sub> (3.4 mg, 20 mol%), NH<sub>4</sub>OAc (46.2 mg, 0.6 mmol, 6 equiv), PhCOOH (24.4 mg, 2 equiv) and 1,4-dioxane (1 mL) under air atmosphere was stirred at 120 °C for 12 h. Only a trace amount of **3** was observed.

## Proposed Mechanism for the Formation of 3'

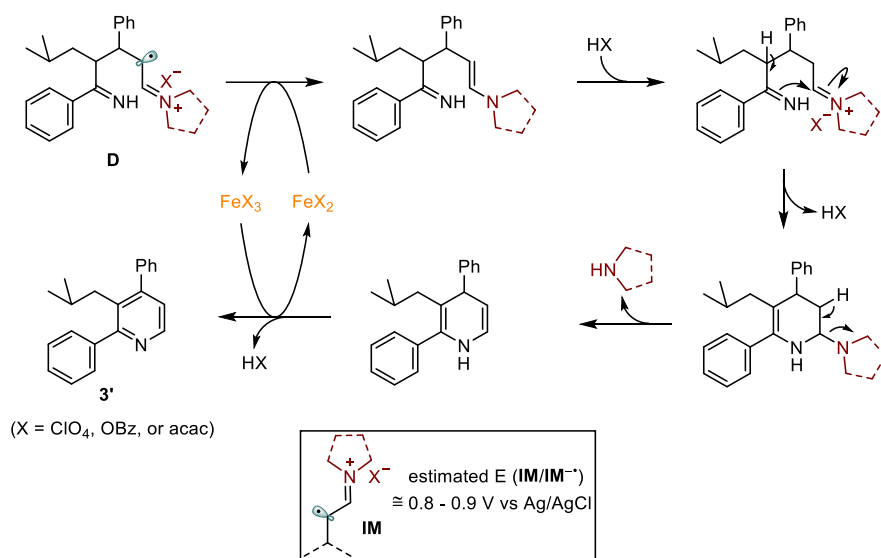

**Scheme S4.** Proposed mechanism for the formation of 3'.

The estimated E (IM/IM<sup>•+</sup>) of  $\alpha$ -iminyl radical cation **IM** that has a similar structure as **D** was reported in 0.8-0.9 V vs Ag/AgCl.<sup>27</sup> Thus, a SET event from reductive Fe(II) ( $E(\text{Fe}^{3+}/\text{Fe}^{2+}) \approx 0.55 \text{ V vs Ag/AgCl}$ ) to the  $\alpha$ -iminyl radical cation **D** might occur to afford the side product 3' via the following pathway (Scheme S4).

## Proposed Model for the Central-to-Axial Chirality Conversion

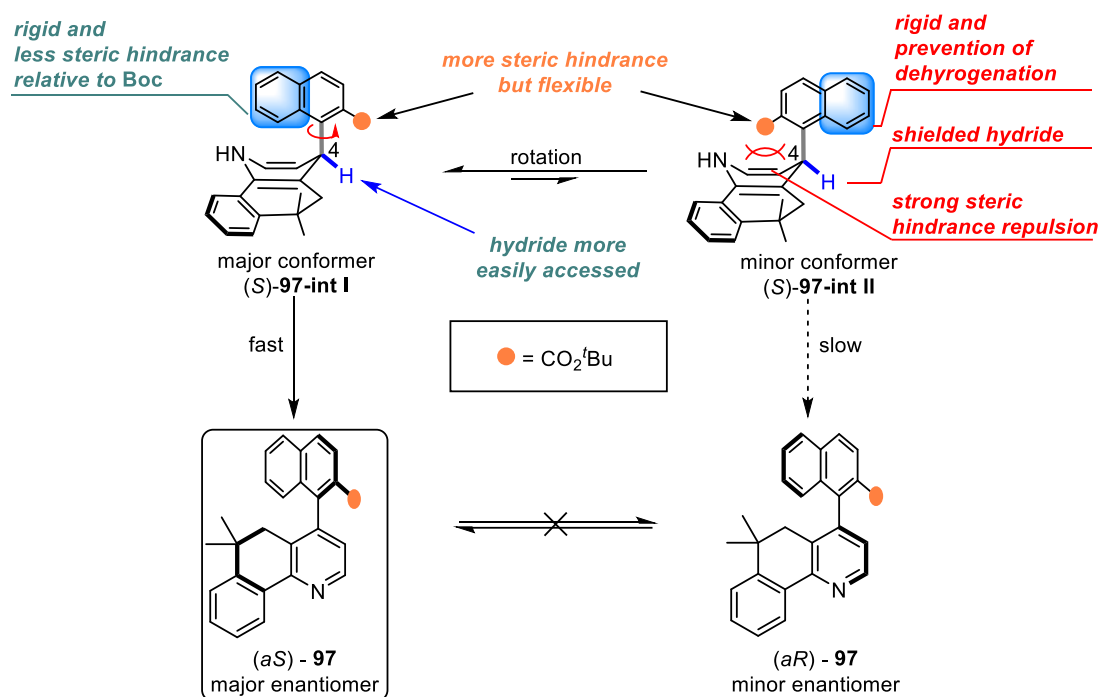

**Scheme S5.** Proposed model for the central-to-axial chirality conversion.

1,4-Dihydropyridines bearing sterically bulky substituents on C4 site in the pseudo-axial position are known to exist predominantly as boat conformers.<sup>28</sup> In the case of compound (S)-97-int I, the sterically bulky group around this bond in the axial orientation slows down its rotation. This rotation was accelerated at a higher temperature (70 °C), resulting in a significant decrease in the enantiomeric ratio value of 97 (entry 10, Table S2). Moreover, the installation of relatively less sterically bulky group (e.g., OTs, OTf, and O<sup>t</sup>Bu groups) at the  $\beta$  position of the naphthyl ring significantly reduced the stereoselectivities at 50 °C (the axially chiral biaryls 112-114). These results indicated that an equilibrium between the two rotamers, (S)-97-int I and (S)-97-int II, would be slowed down by the sterically bulky groups around the pseudo-axial position. In addition, the two rotamers can undergo oxidation to afford axially chiral pyridines, (aS)-97 and (aR)-97, respectively. Our observations point towards a scenario where the two conformers are in a slow equilibrium, and the central-to-axial chirality conversion depends on the stability of the two conformers and the ability of the oxidant to efficiently discriminate between the two conformers. The absolute configuration of 97 indicates that oxidation preferentially occurs from the more stable conformer (S)-97-int I to afford the desired enantioenriched (aS)-97 with efficient central-to-axial chirality conversion. It can be attributed to the fact that the sterically bulky tert-butoxycarbonyl group is positioned away from the crowded dihydropyridine ring, which resulted in a weak repulsion between the polycyclic dihydropyridine skeleton and the rigid aromatic ring. As such, the conformer (S)-97-int I is more stable. Moreover, the hydride on C4 site is more easily accessed by the oxidant than one in the conformer (S)-97-int II, because the tert-butoxycarbonyl group is flexible so that the hydride transfer would not be efficiently hampered (Scheme S5).

## References

- [1] Leonard, N. J.; Paukstelis, J. V. Direct Synthesis of Ternary Iminium Salts by Combination of Aldehydes or Ketones with Secondary Amine Salts<sup>1,2</sup>. *J. Org. Chem.* **1963**, *28*, 3021-3024.
- [2] Zhang, Y.; Yin, Z.; Wu, X. F. Iron-Catalyzed Synthesis of Dihydronaphthalenones from Aromatic Oxime Esters. *Adv. Synth. Catal.* **2019**, *361*, 3223-3227.
- [3] Liang, W.; Jiang, K.; Du, F.; Yang, J.; Shuai, L.; Ouyang, Q.; Chen, Y.-C.; Wei, Y. Iron-Catalyzed, Iminyl Radical-Triggered Cascade 1,5-Hydrogen Atom Transfer/(5+2) or (5+1) Annulation: Oxime as a Five-Atom Assembling Unit. *Angew. Chem. Int. Ed.* **2020**, *59*, 19222-19228.
- [4] Jiang, K.; Li, S.-J.; Liu, Q.-P.; Yu, N.; Li, Y.-L.; Zhou, Y.-Q.; He, K.-C.; Lin, J.; Zheng, T.-Y.; Lang, J.; Lan, Y.; Wei, Y. Iminyl radical-triggered relay annulation for the construction of bridged aza-tetracycles bearing four contiguous stereogenic centers. *Chem. Sci.* **2022**, *13*, 7283-7288.
- [5] Dauncey, E. M.; Morcillo, S. P.; Douglas, J. J.; Sheikh, N. S. Leonori, D. Photoinduced Remote Functionalizations by Iminyl Radical Promoted C-C and C-H Bond Cleavage Cascades. *Angew. Chem. Int. Ed.* **2018**, *57*, 744-748.
- [6] Torres-Ochoa, R. O.; Leclair, A.; Wang, Q.; Zhu, J. Iron-Catalysed Remote C (sp<sup>3</sup>)-H Azidation of O-Acyl Oximes and N-Acyloxy Imidates Enabled by 1, 5-Hydrogen Atom Transfer of Iminyl and Imidate Radicals: Synthesis of  $\gamma$ -Azido Ketones and  $\beta$ -Azido Alcohols. *Chem. Eur. J.* **2019**, *25*, 9477-9484.
- [7] Li, J.; Zhang, W.; Wang, F.; Jiang, M.; Dong, X.; Zhao, W. An Efficient  $\alpha$ -Alkylation of Aromatic Ketones with Primary Alcohols Catalyzed by [Cp\*IrCl<sub>2</sub>]<sub>2</sub> without Solvent. *Chin. J. Chem.* **2012**, *30*, 2363-2366.
- [8] Yang, S.; Liu, L.; Zhou, Z.; Huang, Z.; Zhao, Y. Palladium-catalyzed direct C-H arylation of 3-butenic acid derivatives. *Org. Lett.* **2020**, *23*, 296-299.
- [9] Wang, C.; Xing, Z.; Ge, Q.; Yu, Y.; Wang, M.; Duan, W.-L. Site-selective desaturation of C (sp<sup>3</sup>)-C (sp<sup>3</sup>) bonds via photoinduced ruthenium catalysis. *Org. Chem. Front.* **2022**, *9*, 4316-4327.
- [10] Gu, Y.-R.; Duan, X.-H.; Chen, L.; Ma, Z.-Y.; Gao, P.; Guo, L.-N. Iminyl radical-triggered intermolecular distal C (sp<sup>3</sup>)-H heteroarylation via 1, 5-hydrogen-atom transfer (HAT) cascade. *Org. Lett.* **2019**, *21*, 917-920.
- [11] Landge, V. G.; Shrestha, K. K.; Grant, A. J.; Young, M. C. Regioselective  $\alpha$ -Deuteration of Michael Acceptors Mediated by Isopropylamine in D<sub>2</sub>O/AcOD. *Org. Lett.* **2020**, *22*, 9745-9750.
- [12] Beaud, R.; Michelet, B.; Reviriot, Y.; Martin-Mingot, A.; Rodriguez, J.; Bonne, D.; Thibaudeau, S. Enantioenriched Methylene-Bridged Benzazocanes Synthesis by Organocatalytic and Superacid Activations. *Angew. Chem.* **2020**, *132*, 1295-1301.
- [13] Lin, C.-K.; Lu, T.-J. A simple method for the oxidation of primary alcohols with o-iodoxybenzoic acid (IBX) in the presence of acetic acid. *Tetrahedron* **2010**, *66*, 9688-9693.
- [14] Peng, X.; Xu, J.; Li, T.; Chi, Y. R.; Jin, Z. Chemo-selective cross reaction of two enals via carbene-catalyzed dual activation. *Chem. Sci.* **2020**, *11*, 12533-12539.
- [15] Battistuzzi, G.; Cacchi, S.; Fabrizi, G. An efficient palladium-catalyzed synthesis of cinnamaldehydes from acrolein diethyl acetal and aryl iodides and bromides. *Org. Lett.* **2003**,

5, 777-780.

- [16] Li, W.; Chen, S.; Xie, J.; Fan, Z.; Yang, K.; Song, Q. Synthesis of axially chiral alkenylboronates through combined copper-and palladium-catalysed atroposelective arylboration of alkynes. *Nat. Synth.* **2023**, *2*, 140-151.
- [17] Bolt, R. R.; Raby-Buck, S. E.; Ingram, K.; Leitch, J. A.; Browne, D. L. Temperature-Controlled Mechanochemistry for the Nickel-Catalyzed Suzuki–Miyaura-Type Coupling of Aryl Sulfamates via Ball Milling and Twin-Screw Extrusion. *Angew. Chem. Int. Ed.* **2022**, *61*, e202210508.
- [18] Bartoli, G.; Bosco, M.; Locatelli, M.; Marcantoni, E.; Melchiorre, P.; Sambri, L. Unusual and unexpected reactivity of t-butyl dicarbonate (Boc<sub>2</sub>O) with alcohols in the presence of magnesium perchlorate. A new and general route to t-butyl ethers. *Org. Lett.* **2005**, *7*, 427-430.
- [19] (a) Gómez-Bengoa, E.; Landa, A.; Lizarraga, A.; Mielgo, A.; Oiarbide, M.; Palomo, C. Catalytic asymmetric  $\alpha$ -alkylation of aldehydes via a SN2'-type addition-elimination pathway. *Chem. Sci.* **2011**, *2*, 353-357. (b) Lin, Q.; Meloni, D.; Pan, Y.; Xia, M.; Rodgers, J.; Shepard, S.; Li, M.; Galya, L.; Metcalf, B.; Yue, T.-Y.; Liu, P.; Zhou, J. Enantioselective Synthesis of Janus Kinase Inhibitor INCB018424 via an Organocatalytic Aza-Michael Reaction. *Org. Lett.* **2009**, *11*, 1999-2002. (c) Stiller, J.; Marqués-López, E.; Herrera, R. P.; Fröhlich, R.; Strohmann, C.; Christmann, M. Enantioselective  $\alpha$ - and  $\gamma$ -Alkylation of  $\alpha,\beta$ -Unsaturated Aldehydes Using Dienamine Activation. *Org. Lett.* **2011**, *13*, 70-73. (d) Kemppainen, E. K.; Sahoo, G.; Valkonen, A.; Pihko, P. M. Mukaiyama–Michael Reactions with Acrolein and Methacrolein: A Catalytic Enantioselective Synthesis of the C17–C28 Fragment of Pectenotoxins. *Org. Lett.* **2012**, *14*, 1086-1089. (e) Murar, C. E.; Harmand, T. J.; Bode, J. W. Improved synthesis of (S)-N-Boc-5-oxaproline for protein synthesis with the  $\alpha$ -ketoacid-hydroxylamine (KAHA) ligation. *Bioorg. Med. Chem.* **2017**, *25*, 4996-5001. (f) Wang, J.; Qi, T.; He, S.; Huang, W.; Peng, C.; Zhan, G.; Han, B. Catalyst-Controlled Switchable (5 + 4)/(3 + 4) Cycloadditions for the Divergent Synthesis of Pyrazole-Fused Seven- and Nine-Membered Heterocycles. *ACS Catal.* **2023**, *13*, 10694-10704. (g) Murar, C. E.; Thuaud, F.; Bode, J. W. KAHA Ligations That Form Aspartyl Aldehyde Residues as Synthetic Handles for Protein Modification and Purification. *J. Am. Chem. Soc.* **2014**, *136*, 18140-18148.
- [20] Zhan, J.-L.; Wu, M.-W.; Wei, D.; Wei, B.-Y.; Jiang, Y.; Yu, W.; Han, B. 4-HO-TEMPO-Catalyzed Redox Annulation of Cyclopropanols with Oxime Acetates toward Pyridine Derivatives. *ACS Catal.* **2019**, *9*, 4179-4188.
- [21] Zhou, W.; Li, H.; Wang, L. Direct Carbo-Acylation Reactions of 2-Arylpyridines with  $\alpha$ -Diketones via Pd-Catalyzed C–H Activation and Selective C(sp<sup>2</sup>)–C(sp<sup>2</sup>) Cleavage. *Org. Lett.* **2012**, *14*, 4594-4597.
- [22] Weimar, M.; Correa da Costa, R.; Lee, F.-H.; Fuchter, M. J. A Scalable and Expedient Route to 1-Aza[6]helicene Derivatives and Its Subsequent Application to a Chiral-Relay Asymmetric Strategy. *Org. Lett.* **2013**, *15*, 1706-1709.
- [23] Zhang, W.-W.; Wang, Q.; Zhang, S.-Z.; Zheng, C.; You, S.-L. (SCp)Rhodium-Catalyzed Asymmetric Satoh–Miura Reaction for Building-up Axial Chirality: Counteranion-Directed Switching of Reaction Pathways. *Angew. Chem. Int. Ed.* **2023**, *62*, e202214460.
- [24] Cheng, Q.; Bhattacharya, D.; Haring, M.; Cao, H.; Mück-Lichtenfeld, C.; Studer, A. Skeletal editing of pyridines through atom-pair swap from CN to CC. *Nat. Chem.* **2024**.

- [25] Bai, H.-Y.; Tan, F.-X.; Liu, T.-Q.; Zhu, G.-D.; Tian, J.-M.; Ding, T.-M.; Chen, Z.-M.; Zhang, S.-Y. Highly atroposelective synthesis of nonbiaryl naphthalene-1,2-diamine N-C atropisomers through direct enantioselective C-H amination. *Nat. Commun.* **2019**, *10*, 3063.
- [26] Wang, S.-J.; Zhai, J.-J.; Wang, L.; Tang, X.-Y. Consecutive regulation of catalytic activities of  $B(C_6F_5)_3 \cdot H_2O$ : direct nucleophilic substitution of benzyl fluorides with alcohol via dual activation. *Org. Chem. Front.* **2023**, *10*, 3849-3855.
- [27] Goti, G.; Bieszczad, B.; Vega-Peñaloza, A.; Melchiorre, P. Stereocontrolled Synthesis of 1, 4-Dicarbonyl Compounds by Photochemical Organocatalytic Acyl Radical Addition to Enals. *Angew. Chem. Int. Ed.* **2019**, *58*, 1213-1217.
- [28] Quinonero, O.; Jean, M.; Vanthuyne, N.; Roussel, C.; Bonne, D.; Constantieux, T.; Bressy, C.; Bugaut, X.; Rodriguez, J. Combining Organocatalysis with Central-to-Axial Chirality Conversion: Atroposelective Hantzsch-Type Synthesis of 4-Arylpyridines. *Angew. Chem. Int. Ed.* **2016**, *55*, 1401-1405.

# NMR Spectra of the New Compounds

## <sup>1</sup>H NMR Spectrum of S9 (600 MHz, CDCl<sub>3</sub>)

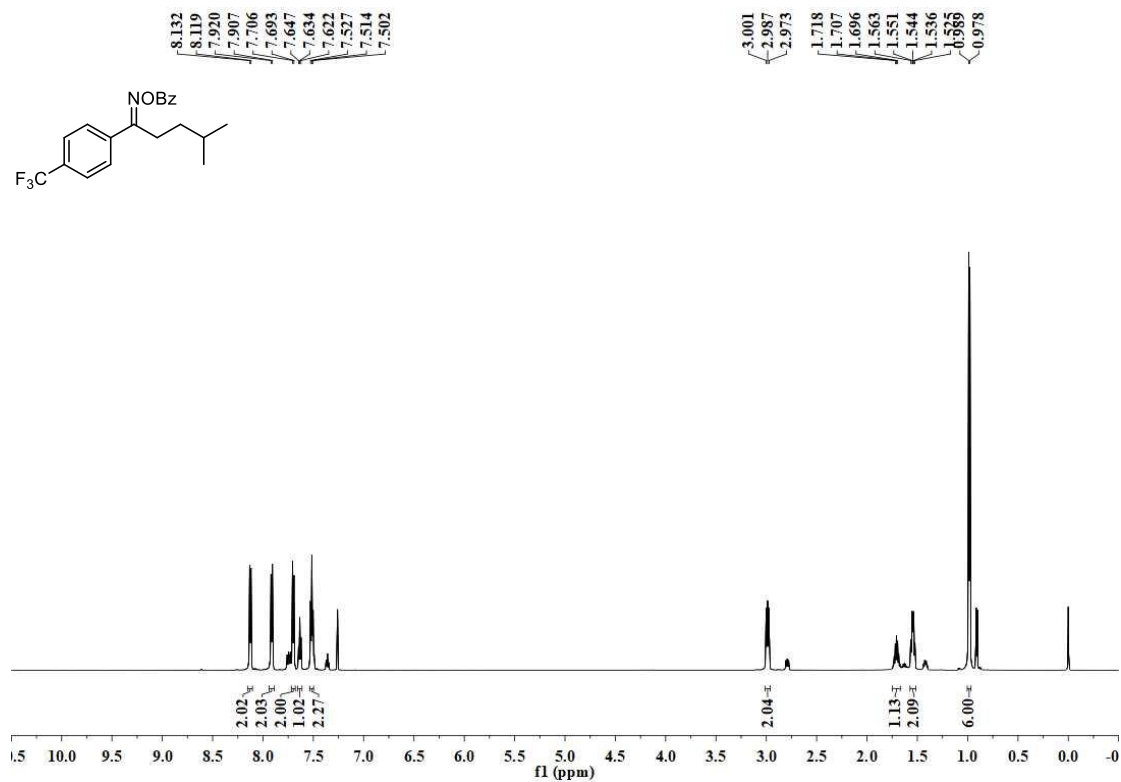

## <sup>13</sup>C NMR Spectrum of S9 (151 MHz, CDCl<sub>3</sub>)

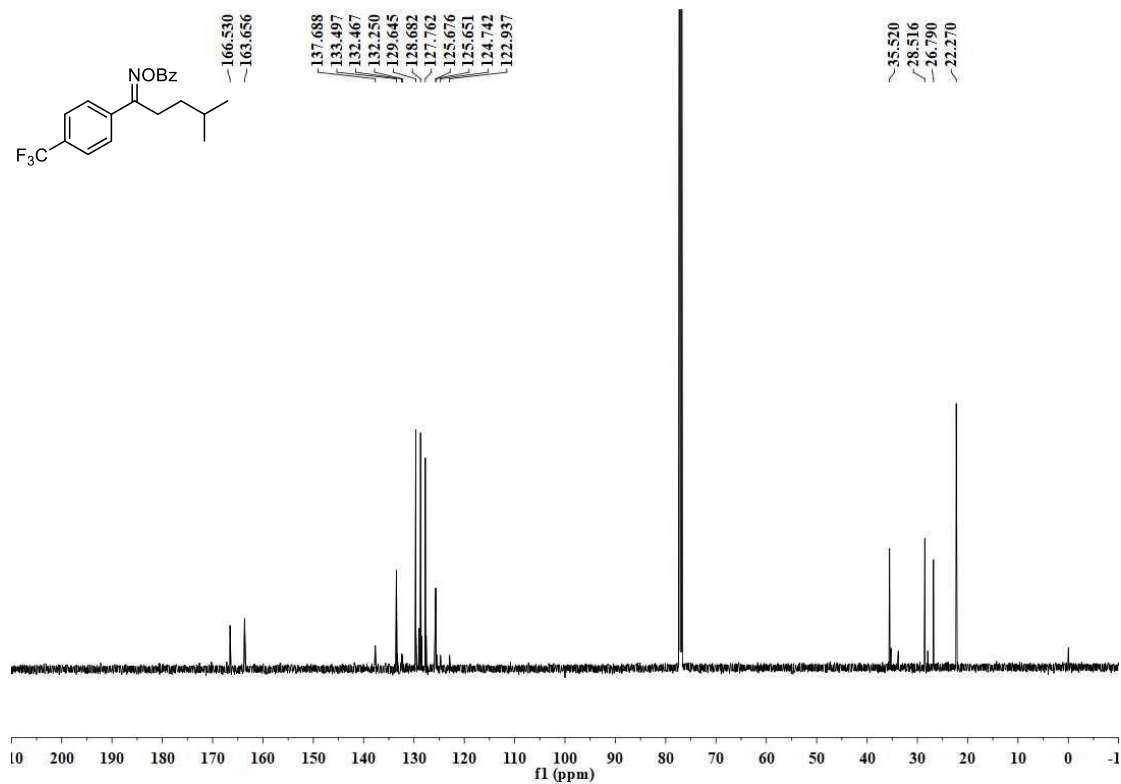

**$^{19}\text{F}$  NMR Spectrum of S9 (565 MHz,  $\text{CDCl}_3$ )**

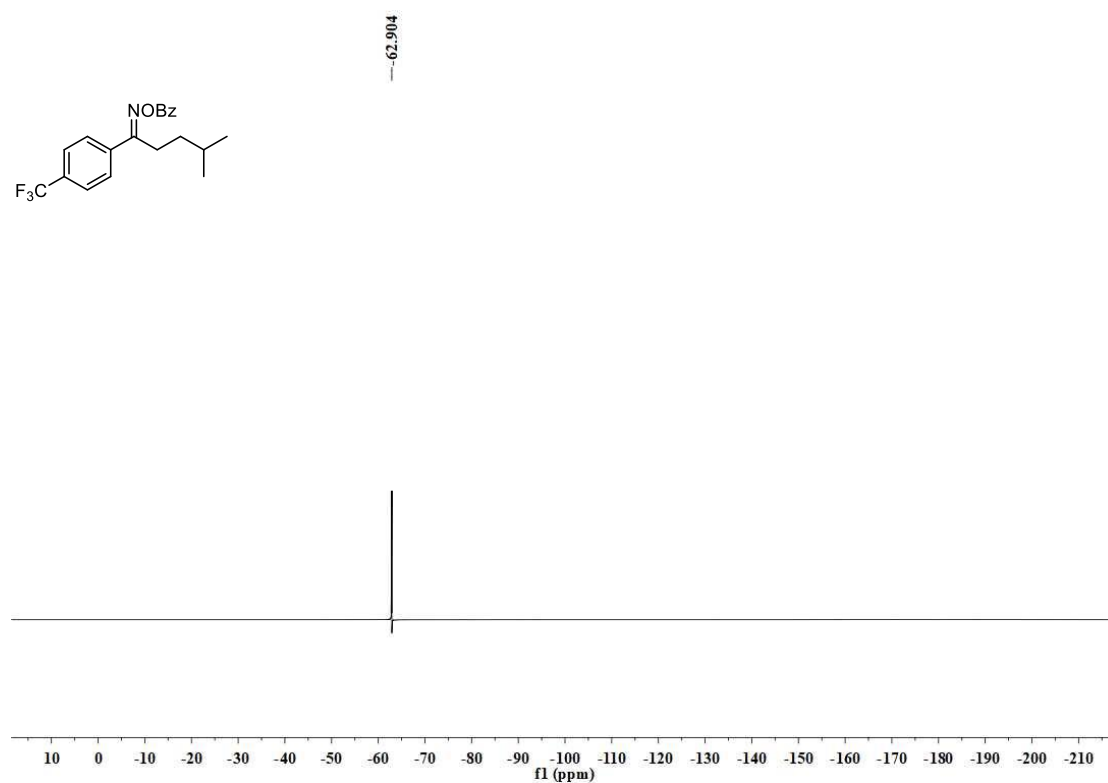

**$^1\text{H}$  NMR Spectrum of S23 (600 MHz,  $\text{CDCl}_3$ )**

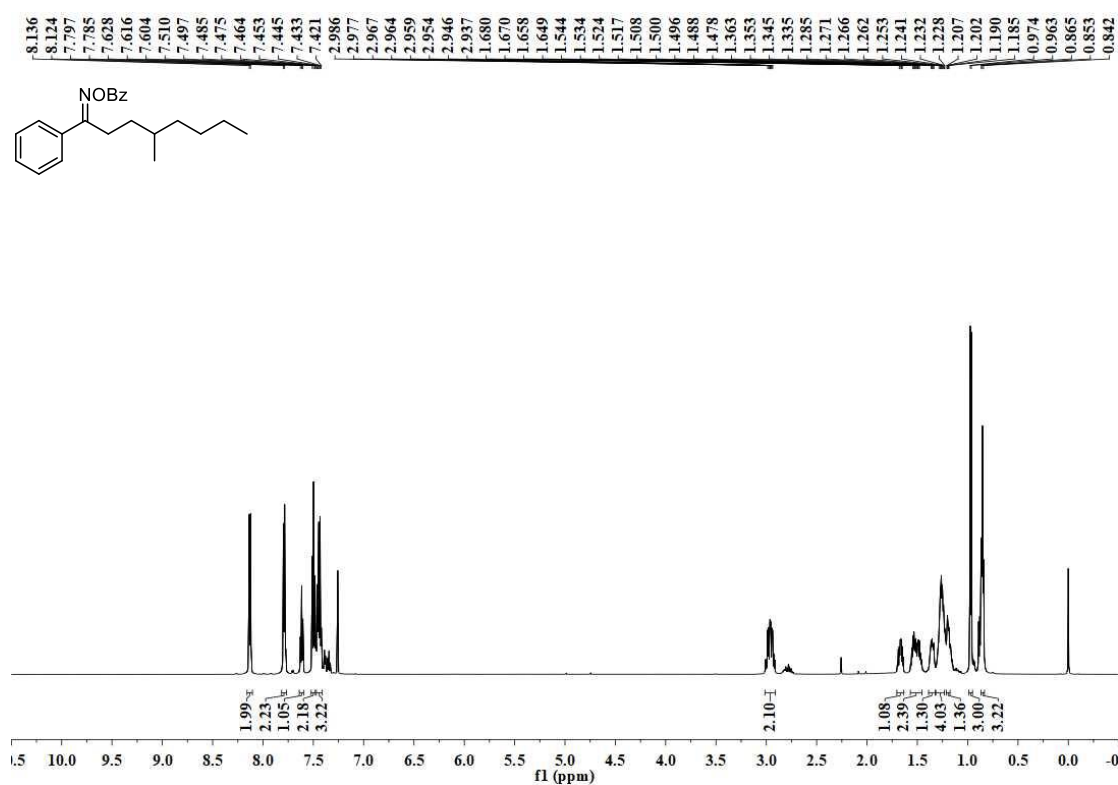



**$^{13}\text{C}$  NMR Spectrum of S23 (151 MHz,  $\text{CDCl}_3$ )**

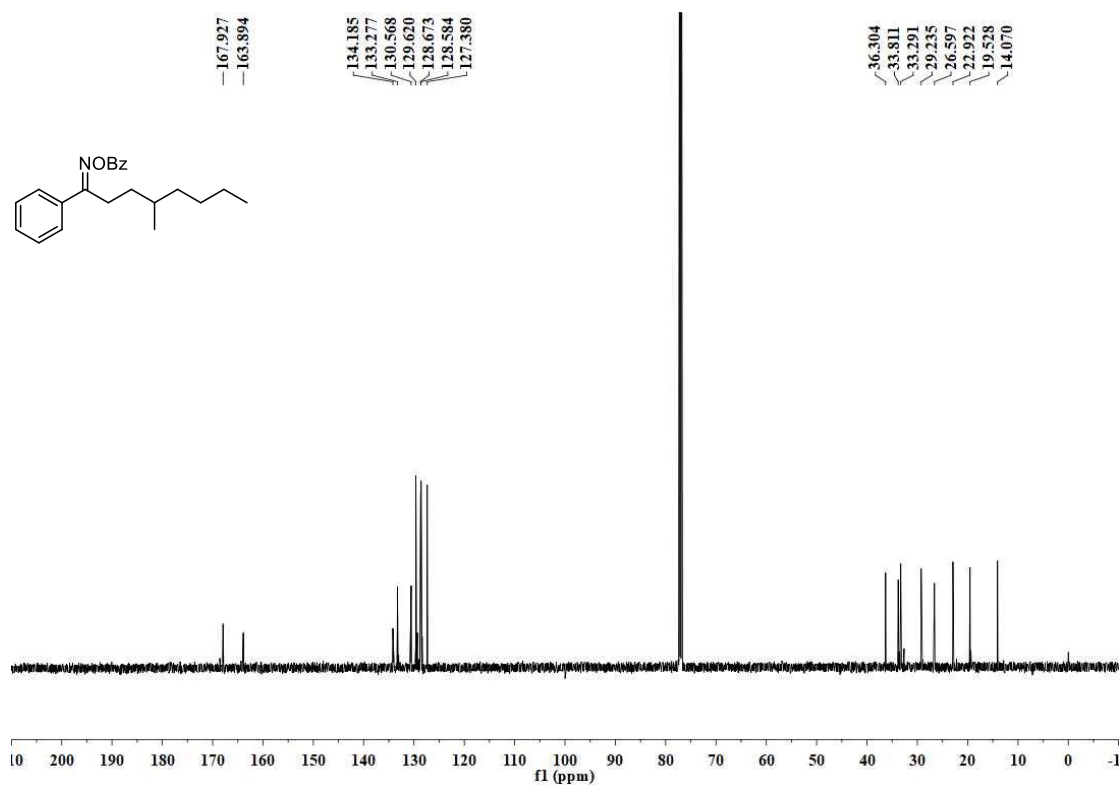

**$^1\text{H}$  NMR Spectrum of S26 (600 MHz,  $\text{CDCl}_3$ )**

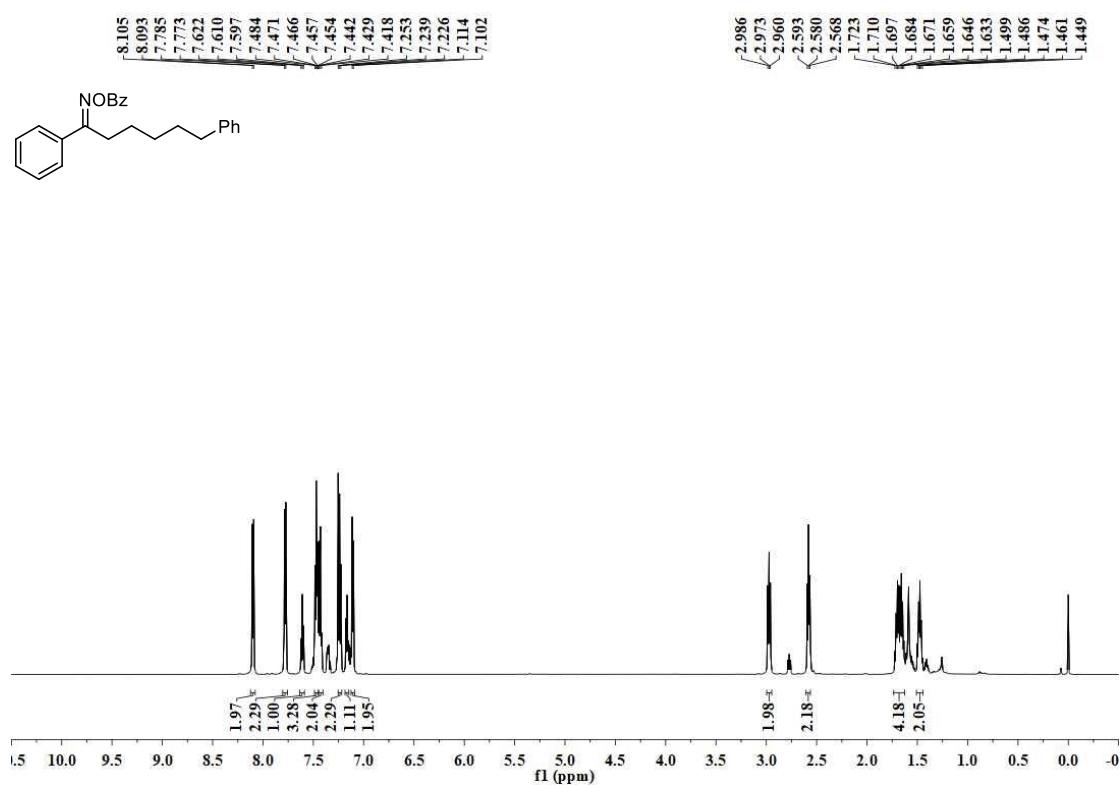

**$^{13}\text{C}$  NMR Spectrum of S26 (151 MHz,  $\text{CDCl}_3$ )**

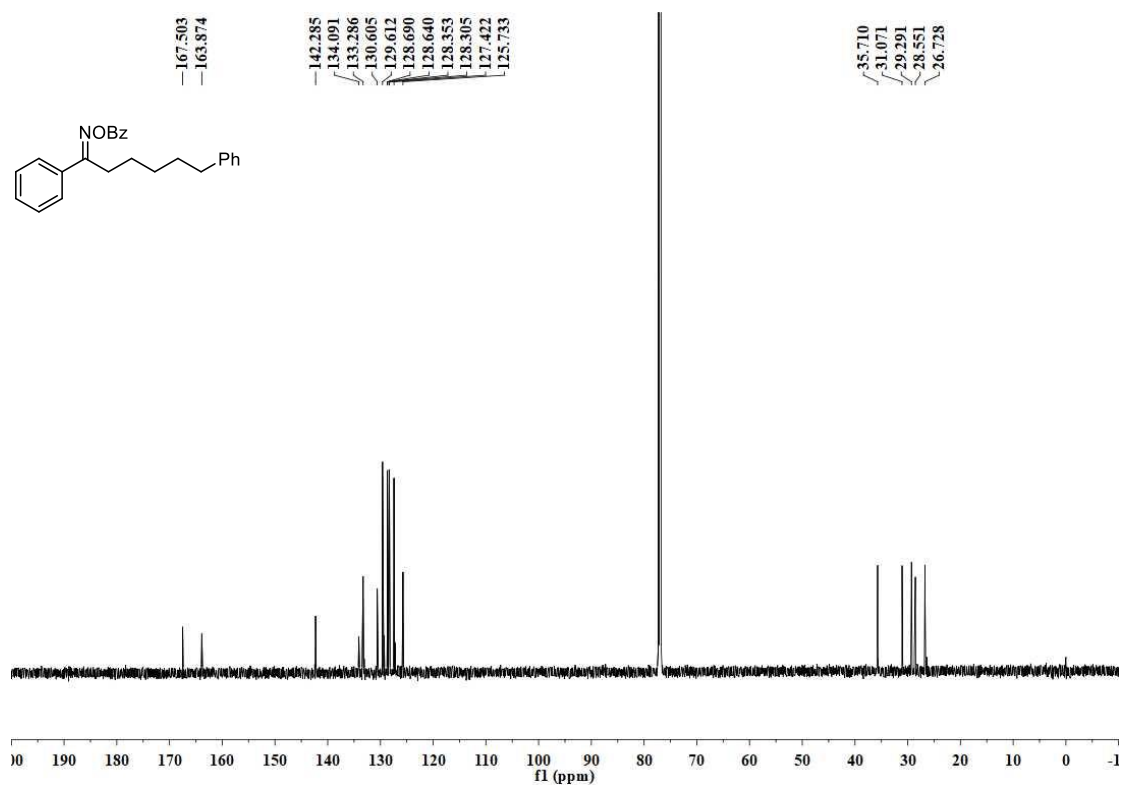

**$^1\text{H}$  NMR Spectrum of S27 (600 MHz,  $\text{CDCl}_3$ )**

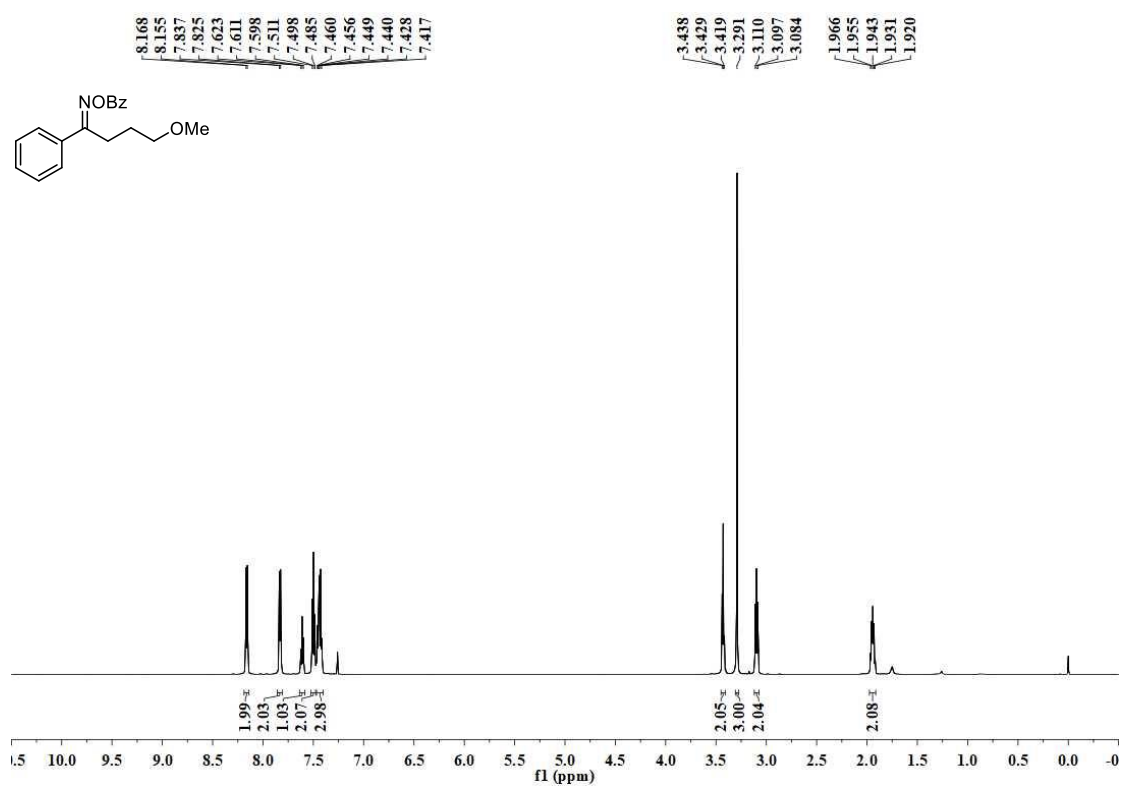

**$^{13}\text{C}$  NMR Spectrum of S27 (151 MHz,  $\text{CDCl}_3$ )**

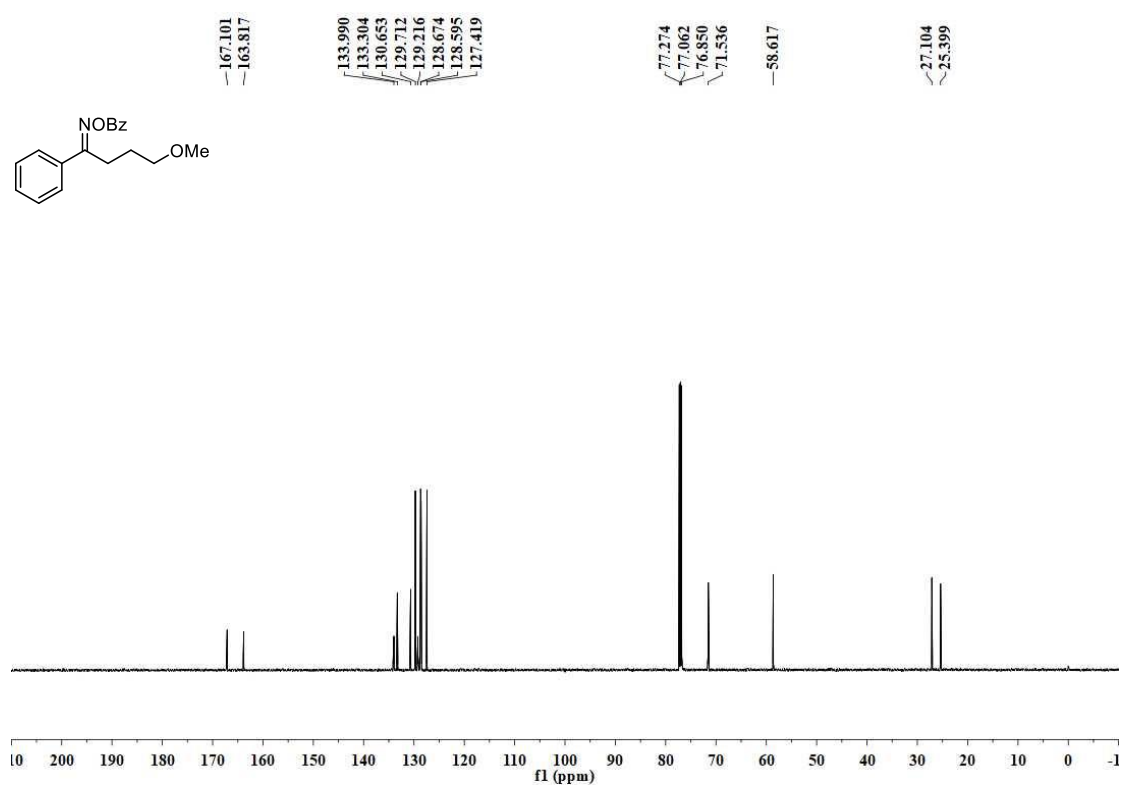

**$^1\text{H}$  NMR Spectrum of S98 (600 MHz,  $\text{CDCl}_3$ )**

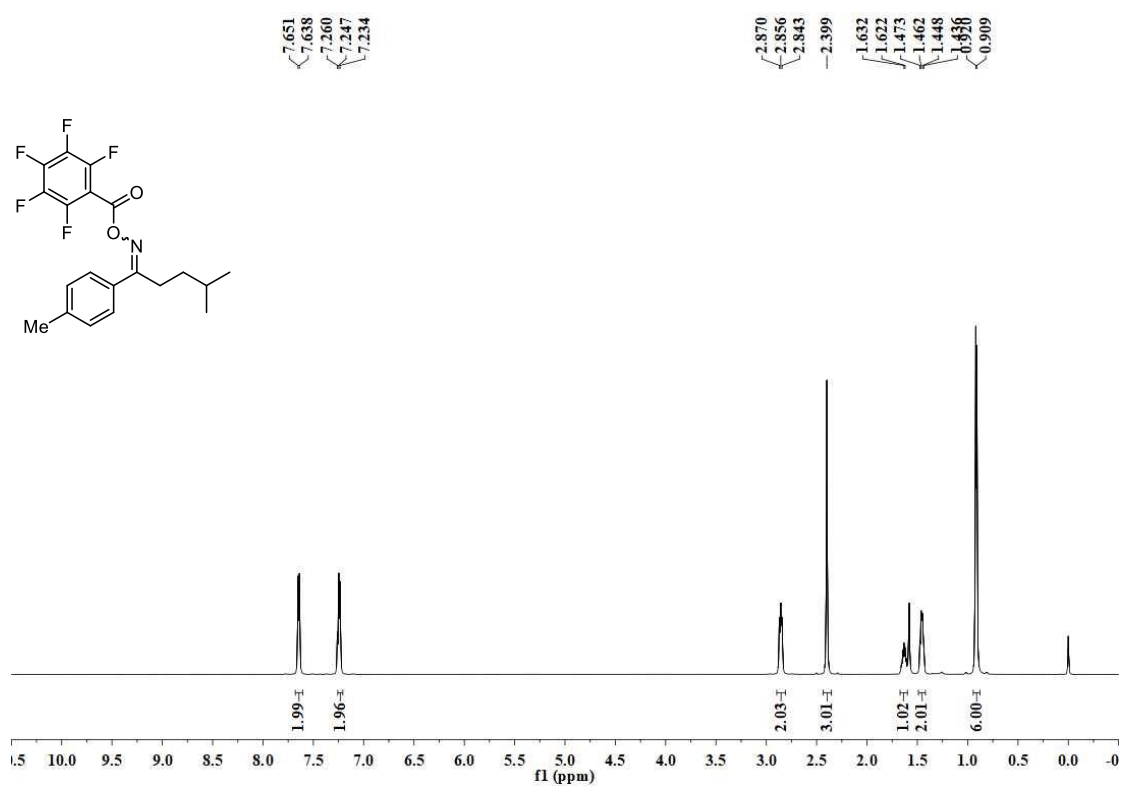

**$^{13}\text{C}$  NMR Spectrum of S98 (151 MHz,  $\text{CDCl}_3$ )**

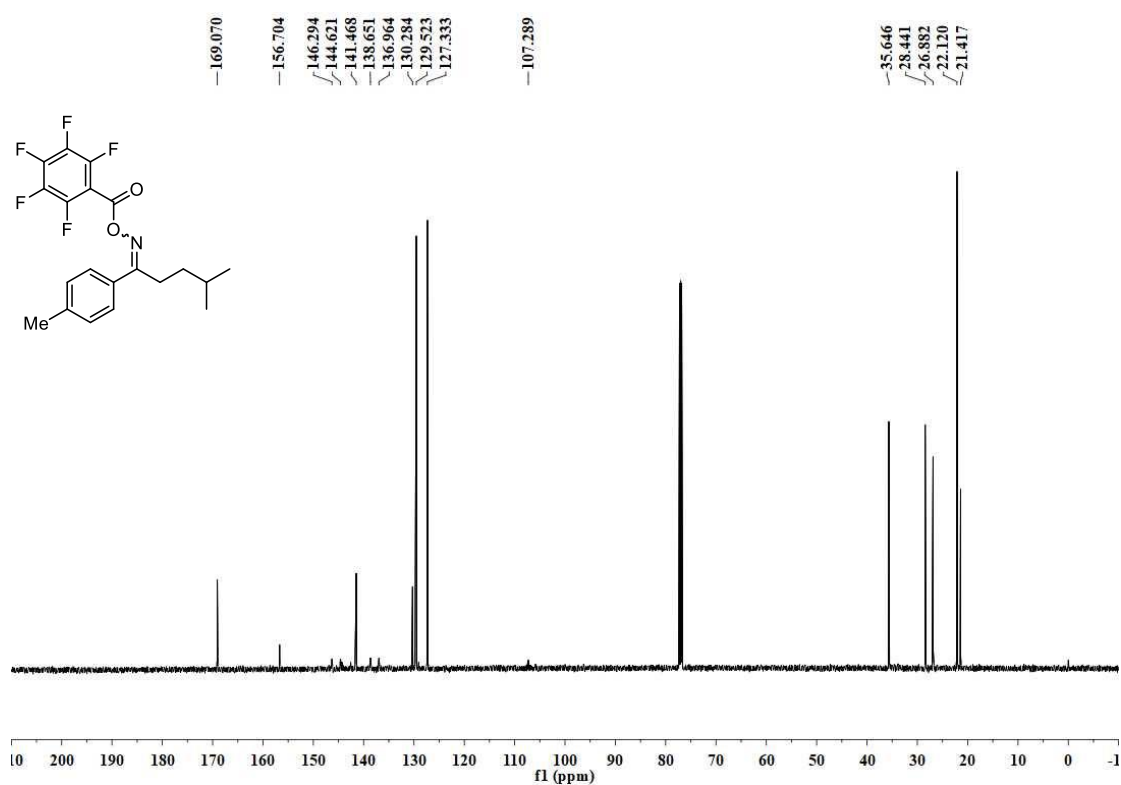

**$^{19}\text{F}$  NMR Spectrum of S98 (565 MHz,  $\text{CDCl}_3$ )**

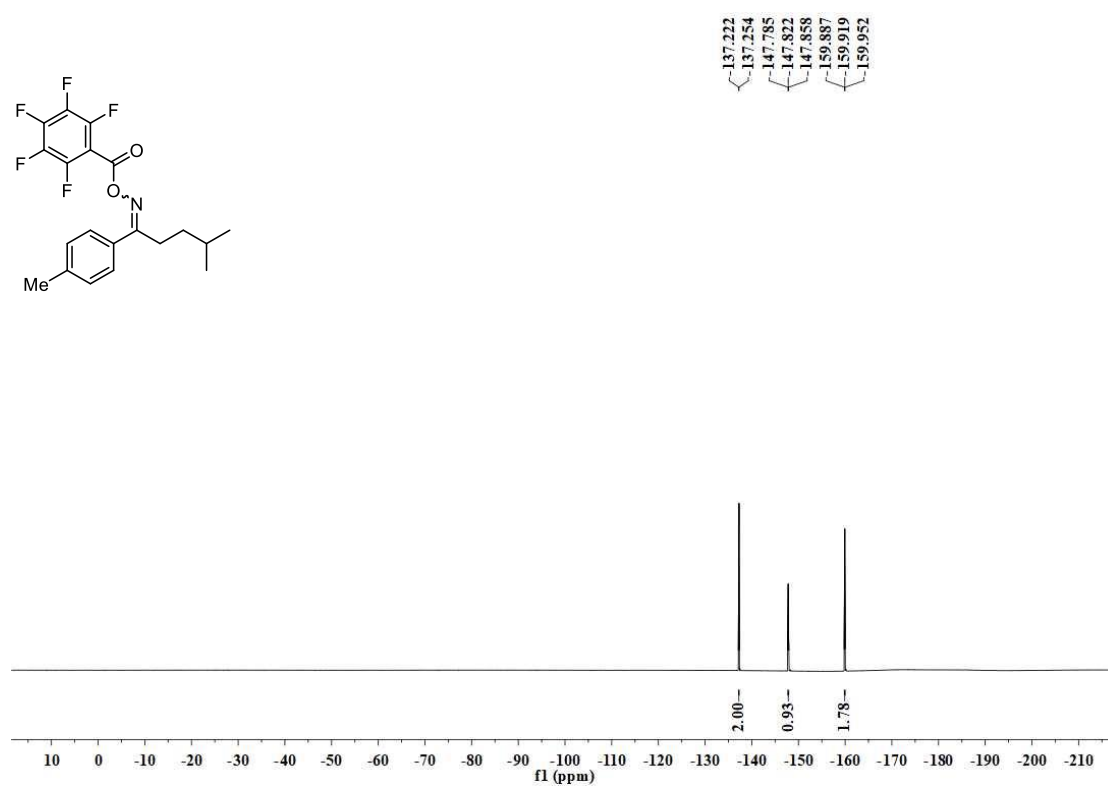

**<sup>1</sup>H NMR Spectrum of S99 (600 MHz, CDCl<sub>3</sub>)**

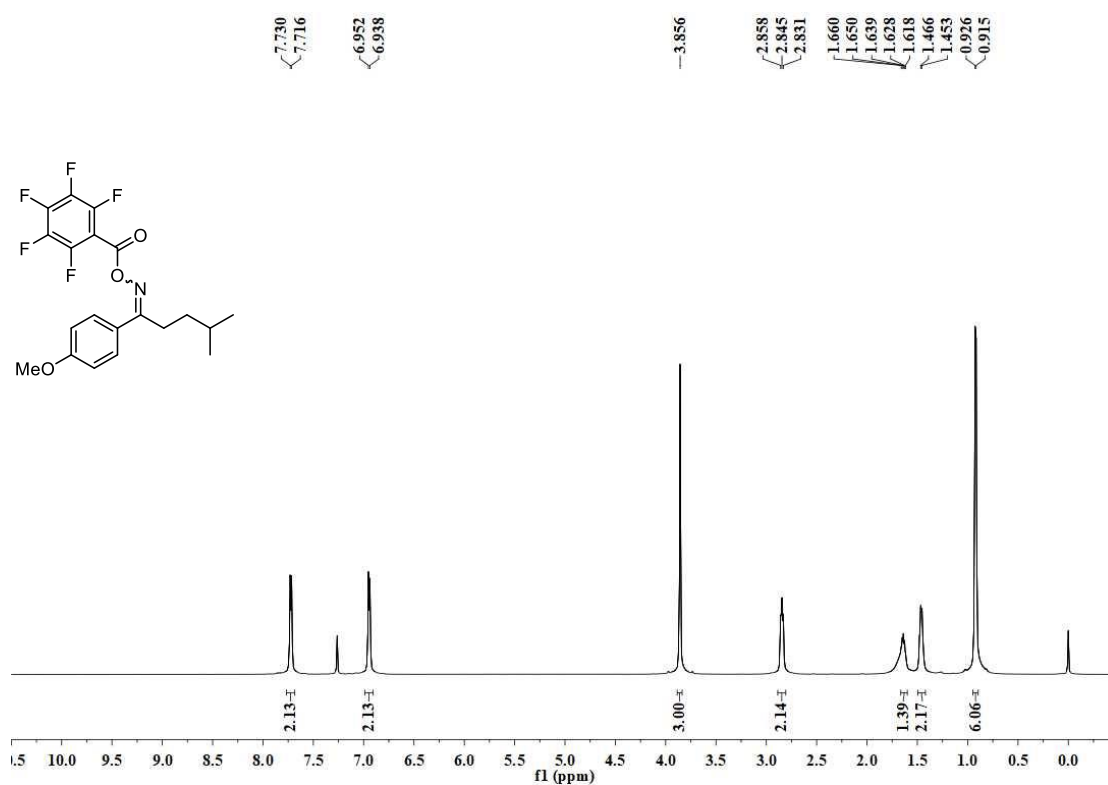

**<sup>13</sup>C NMR Spectrum of S99 (151 MHz, CDCl<sub>3</sub>)**

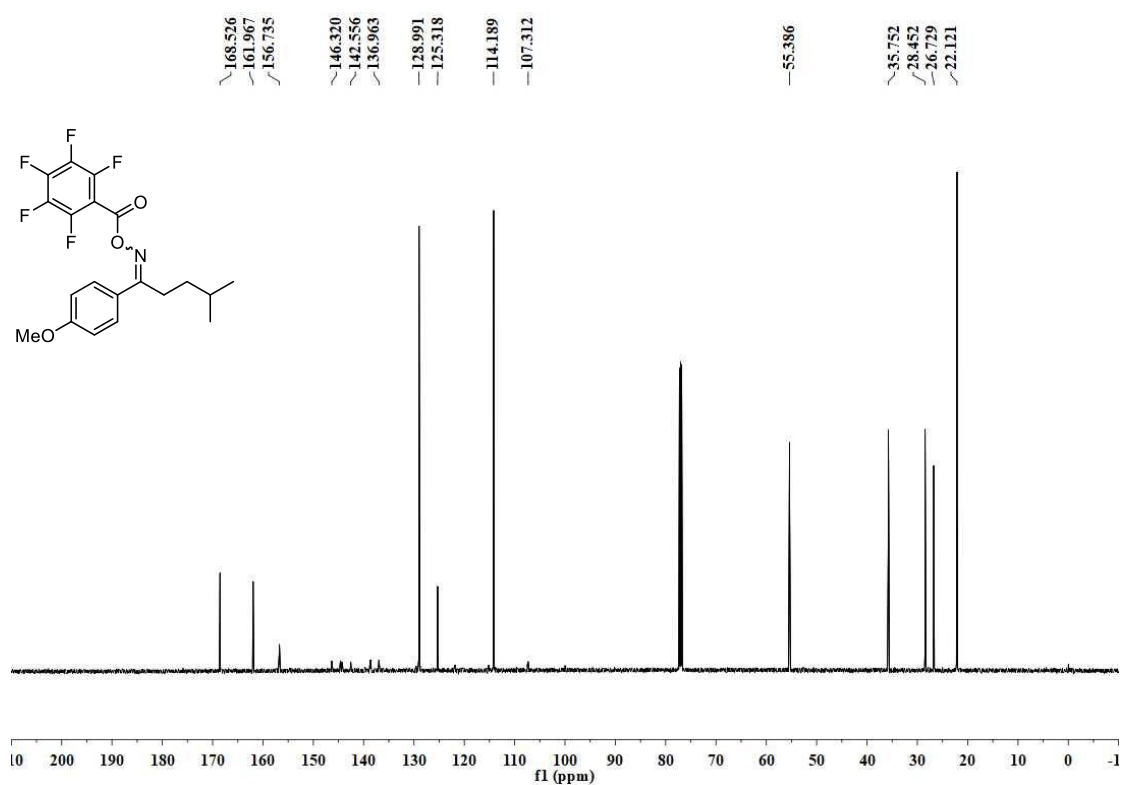

**<sup>19</sup>F NMR Spectrum of S99 (565 MHz, CDCl<sub>3</sub>)**

ZVQ-19F  
ZVQ-4-100

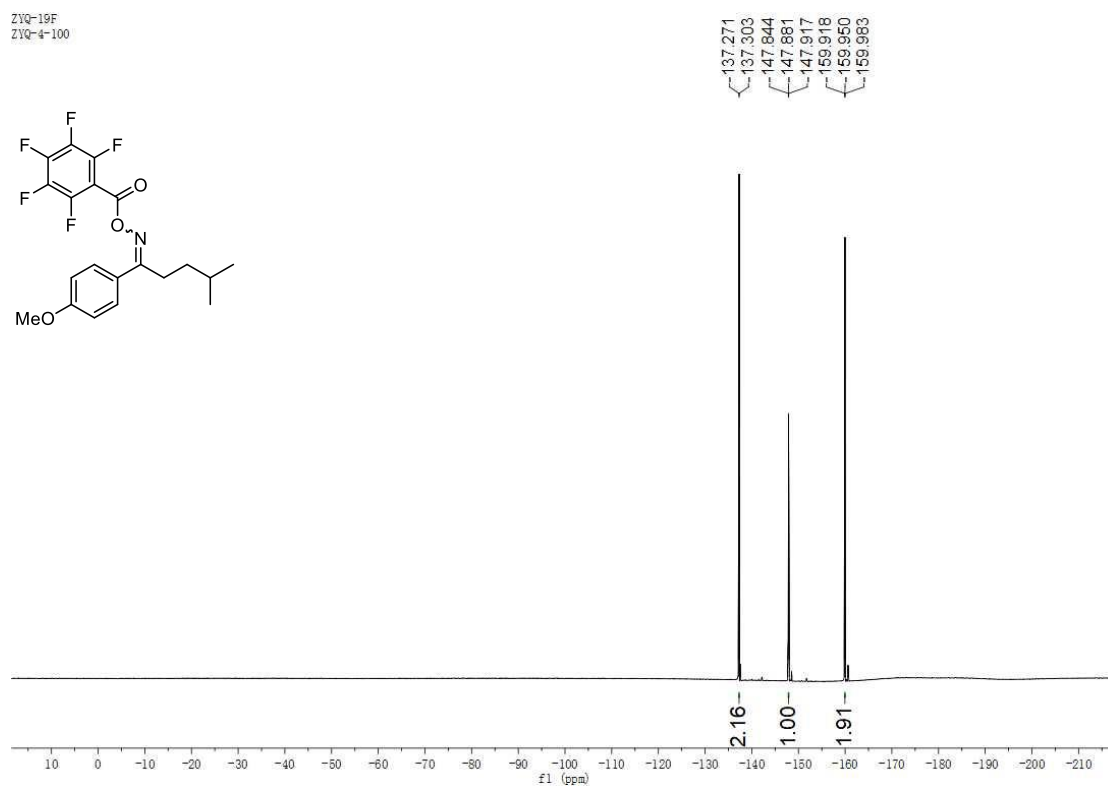

**<sup>1</sup>H NMR Spectrum of S100 (600 MHz, CDCl<sub>3</sub>)**

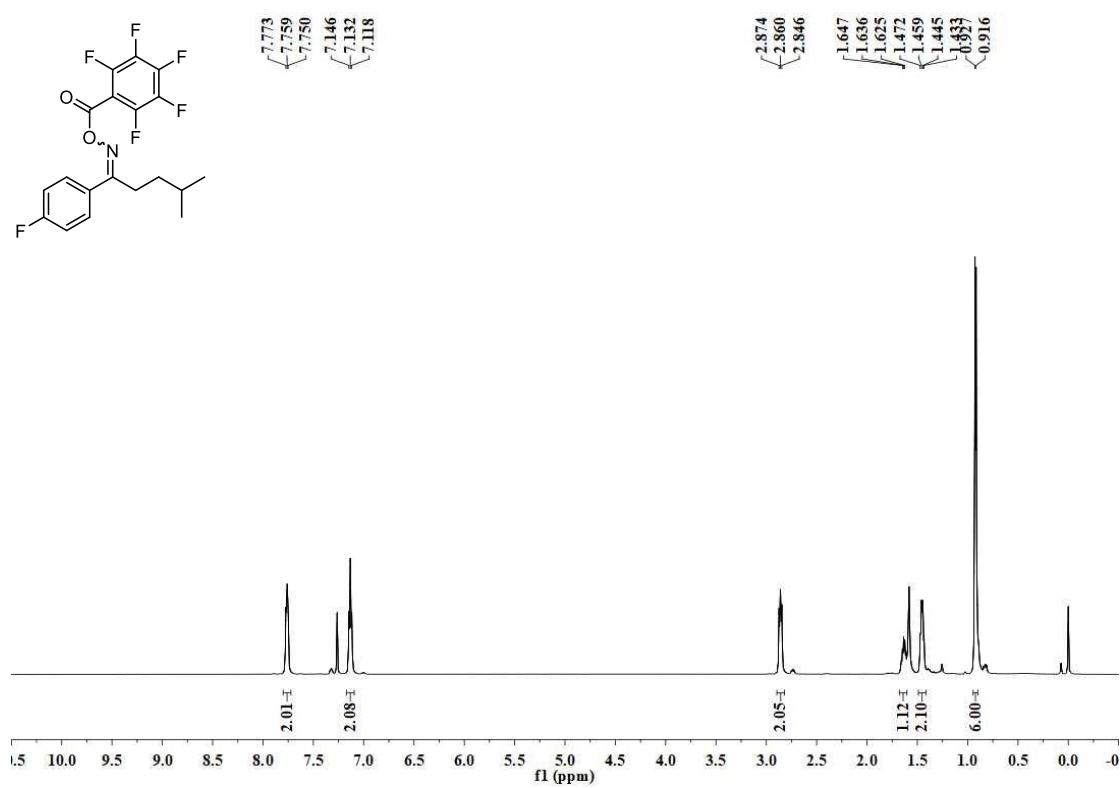

**$^{13}\text{C}$  NMR Spectrum of S100 (151 MHz,  $\text{CDCl}_3$ )**

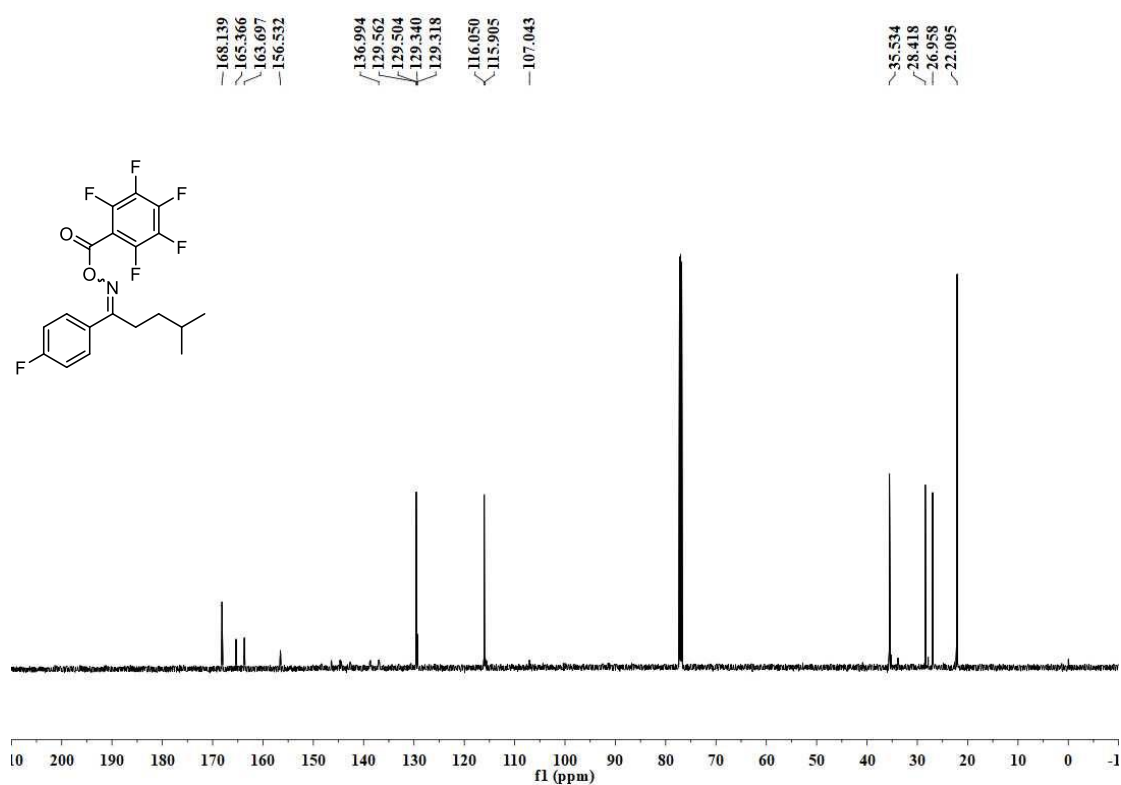

**$^{19}\text{F}$  NMR Spectrum of S100 (565 MHz,  $\text{CDCl}_3$ )**

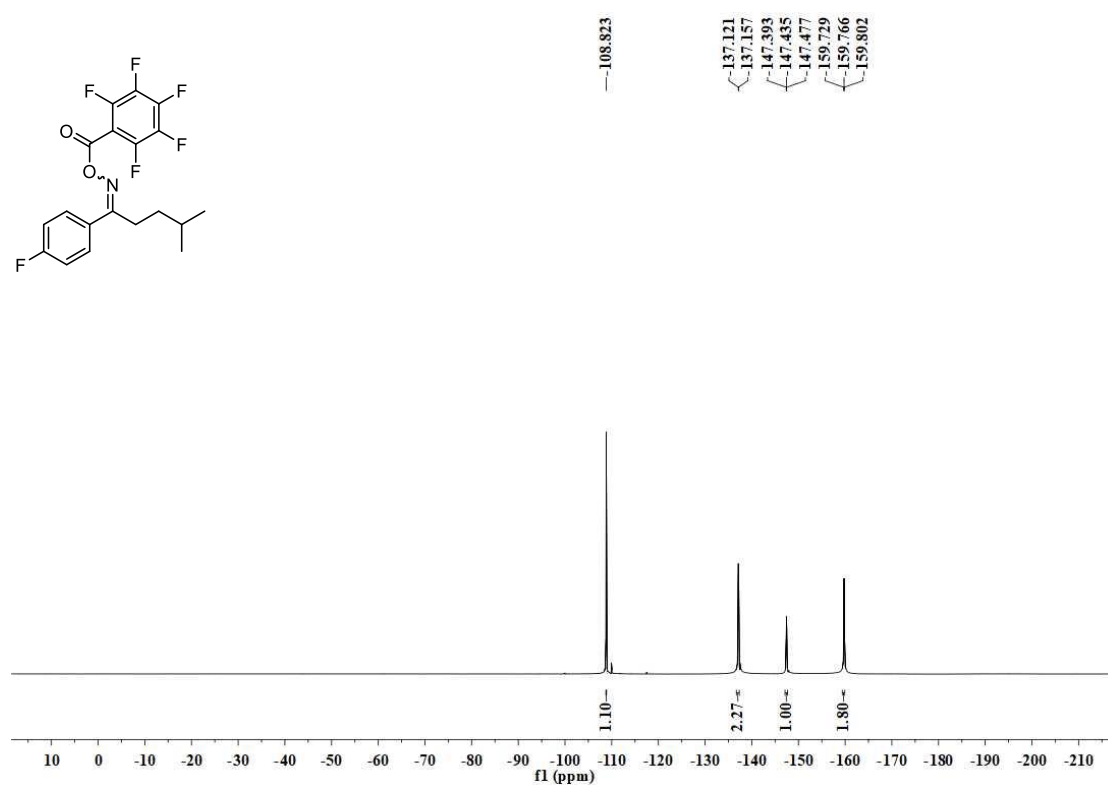

**<sup>1</sup>H NMR Spectrum of S101 (600 MHz, CDCl<sub>3</sub>)**

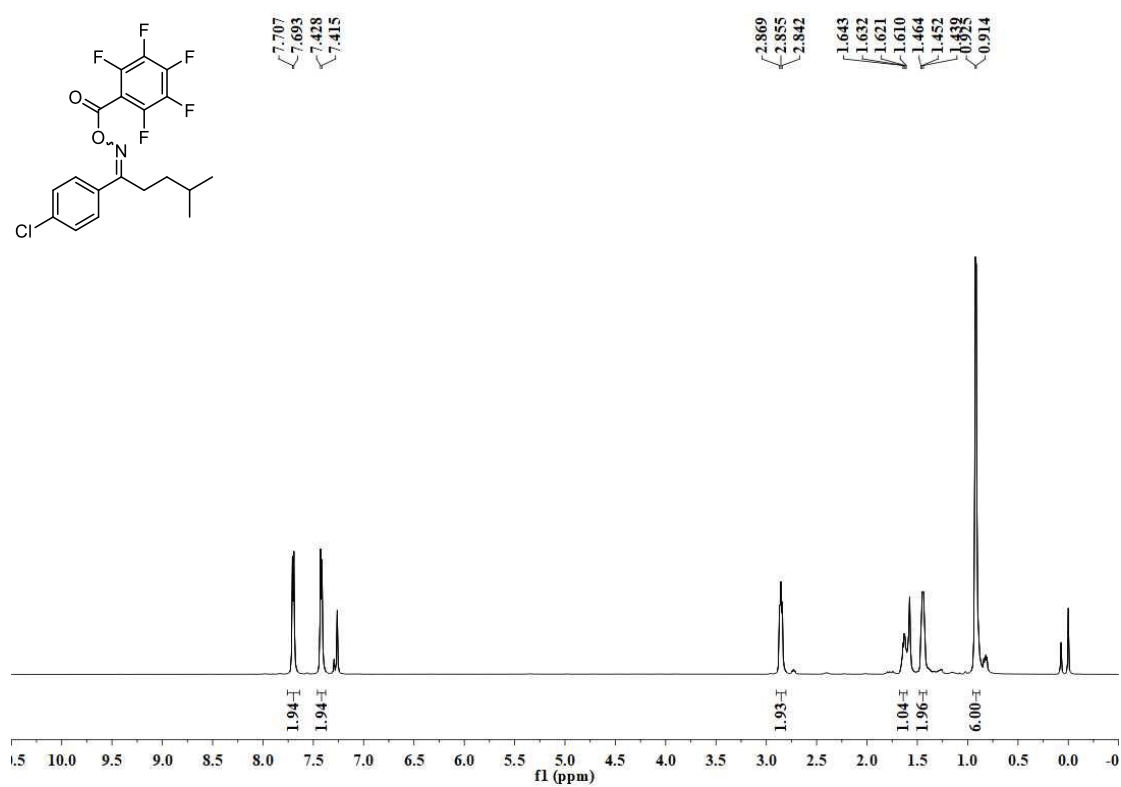

**<sup>13</sup>C NMR Spectrum of S101 (151 MHz, CDCl<sub>3</sub>)**

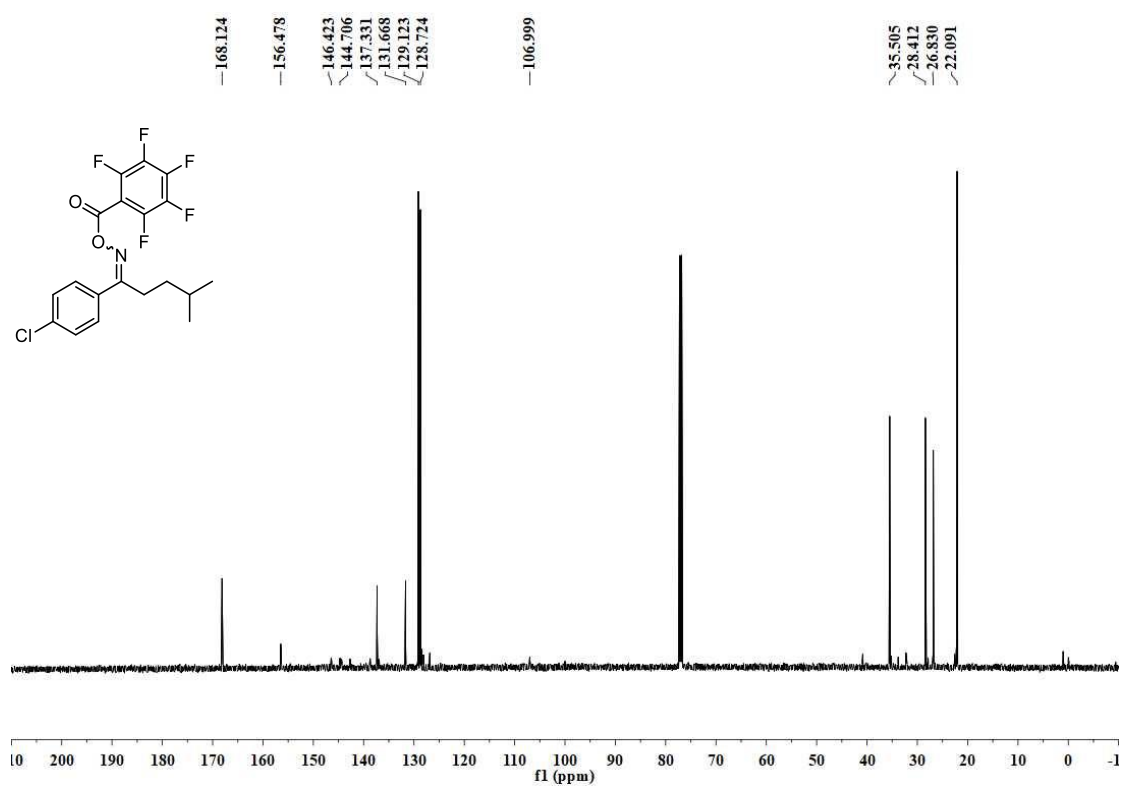



**$^{19}\text{F}$  NMR Spectrum of S101 (565 MHz,  $\text{CDCl}_3$ )**

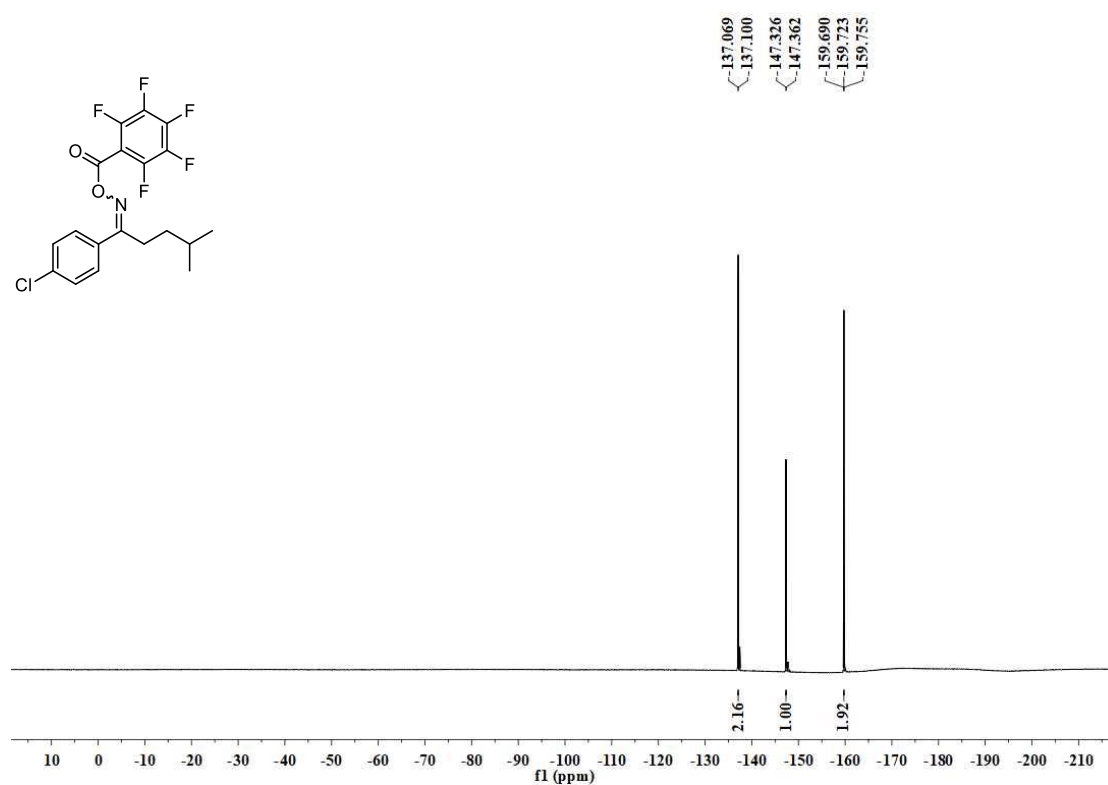

**$^1\text{H}$  NMR Spectrum of S102 (600 MHz,  $\text{CDCl}_3$ )**

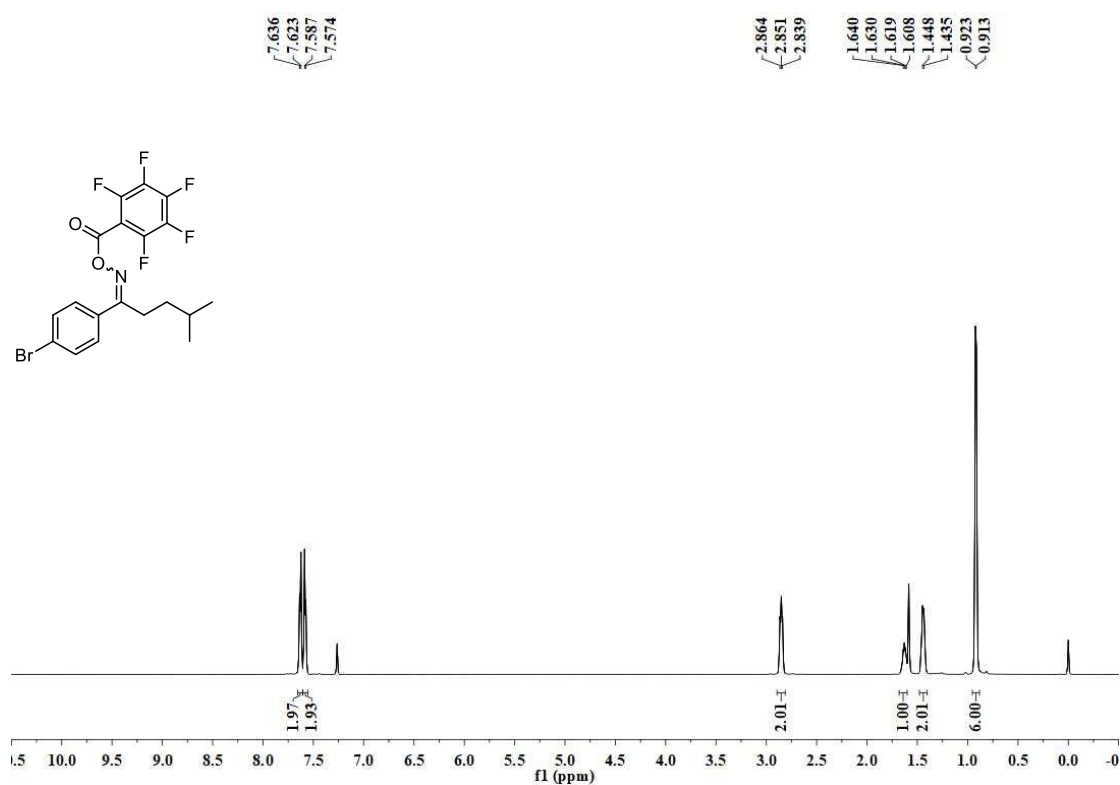

**$^{13}\text{C}$  NMR Spectrum of S102 (151 MHz,  $\text{CDCl}_3$ )**

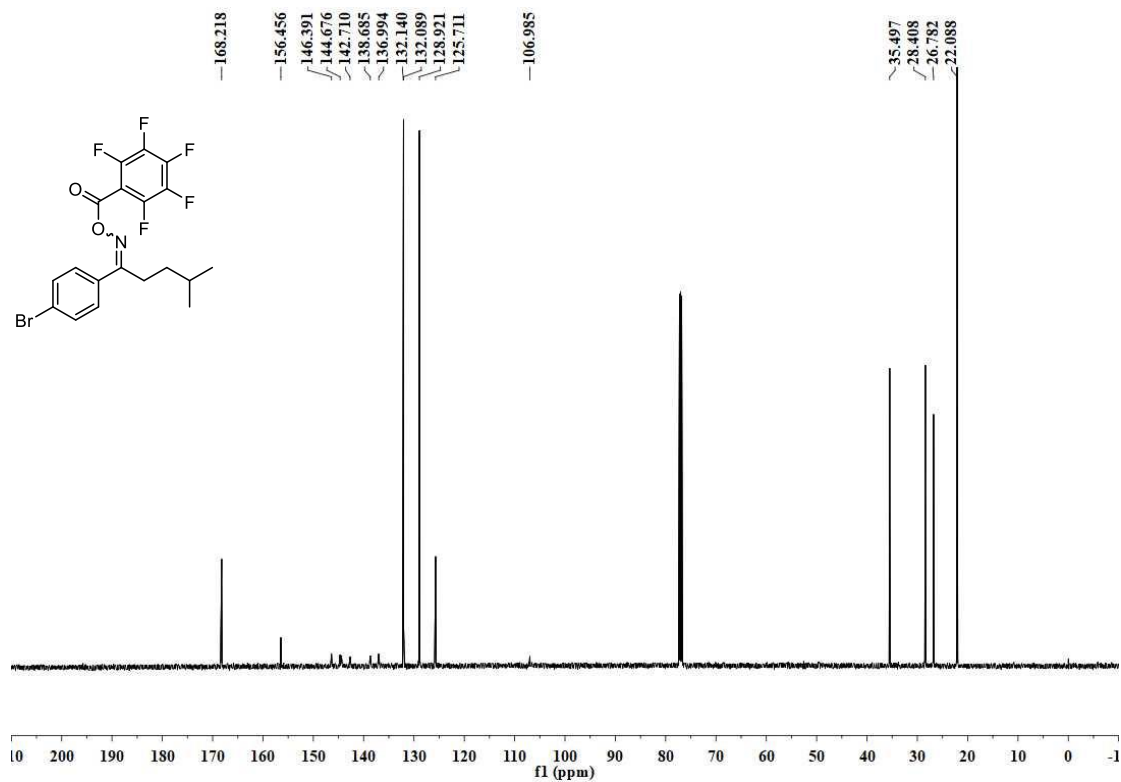

**$^{19}\text{F}$  NMR Spectrum of S102 (565 MHz,  $\text{CDCl}_3$ )**

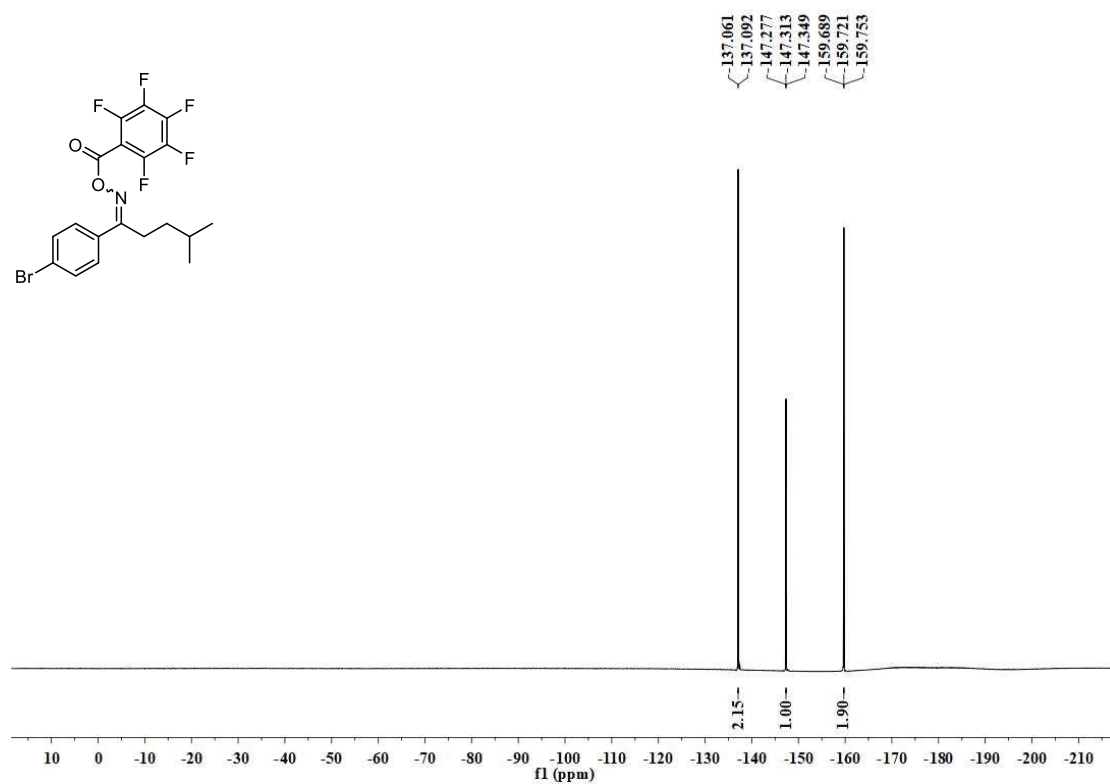

**<sup>1</sup>H NMR Spectrum of S104 (600 MHz, CDCl<sub>3</sub>)**

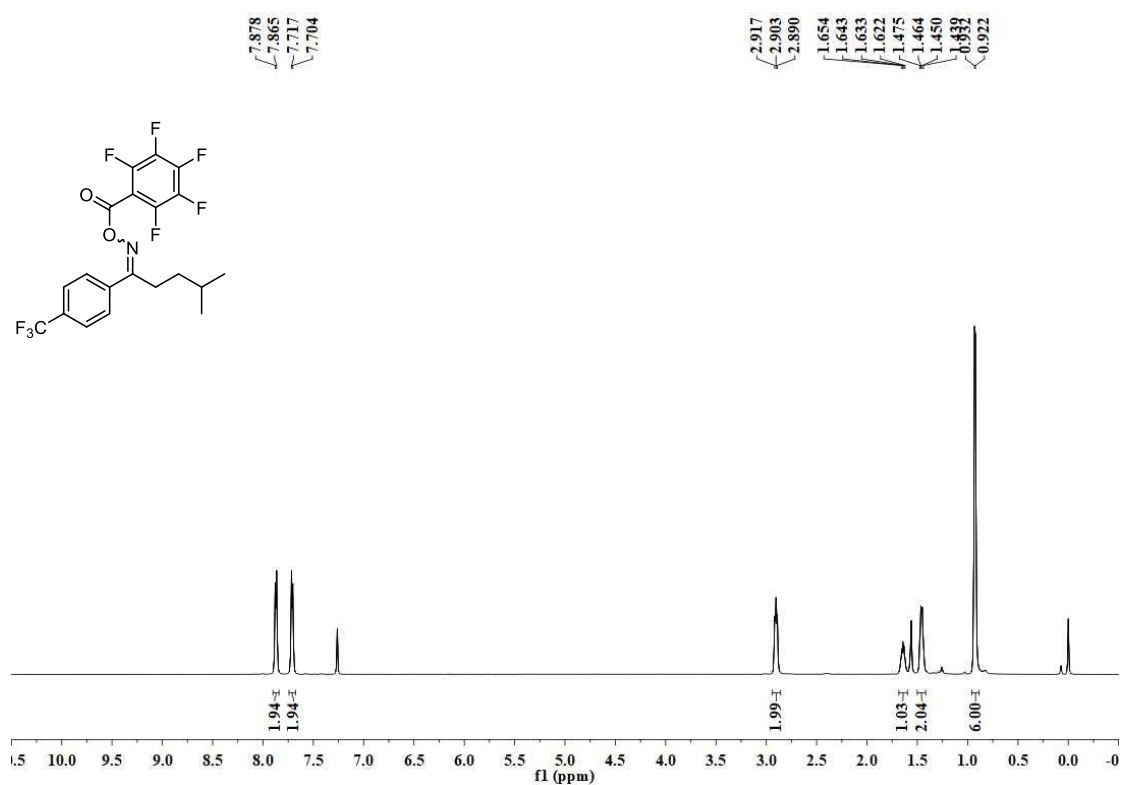

**<sup>13</sup>C NMR Spectrum of S104 (151 MHz, CDCl<sub>3</sub>)**

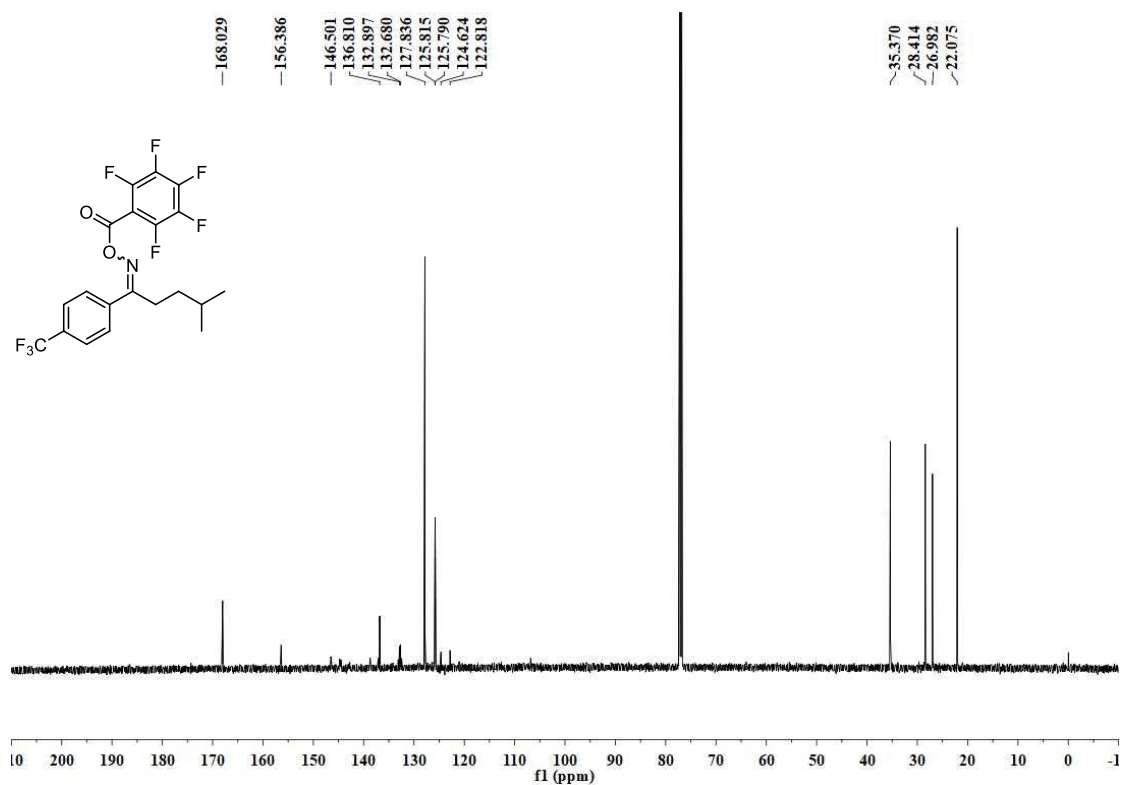

**$^{19}\text{F}$  NMR Spectrum of S104 (565 MHz,  $\text{CDCl}_3$ )**

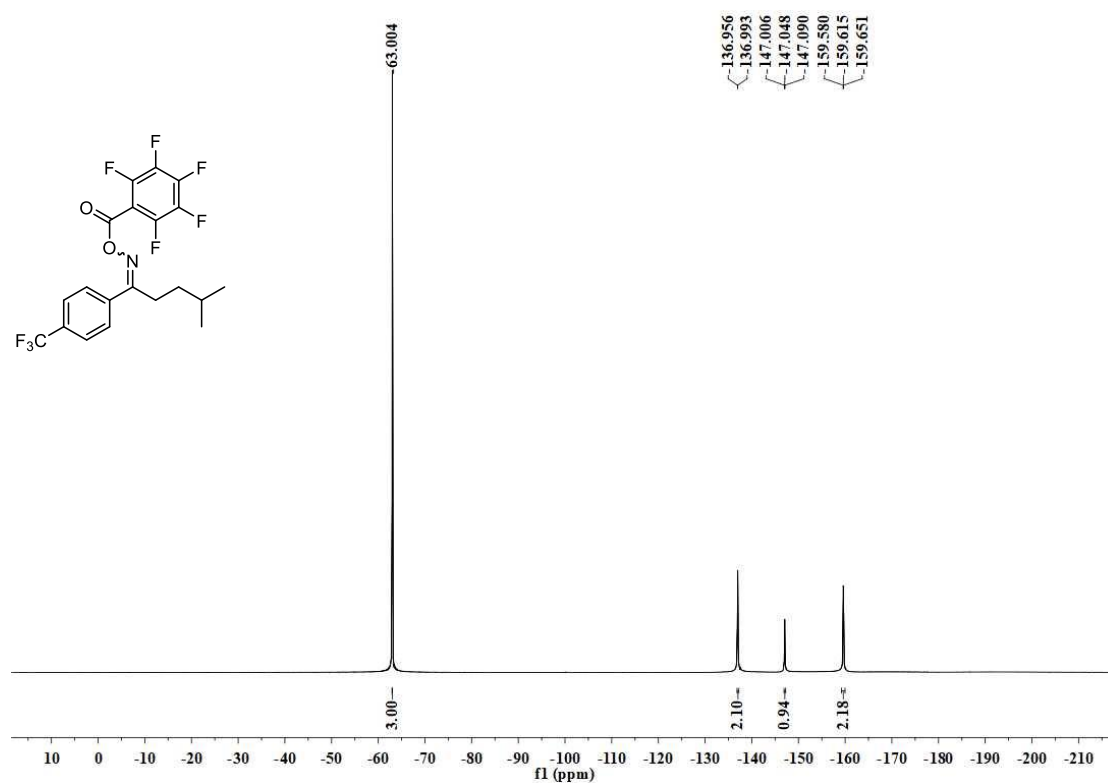

**$^1\text{H}$  NMR Spectrum of S105 (600 MHz,  $\text{CDCl}_3$ )**

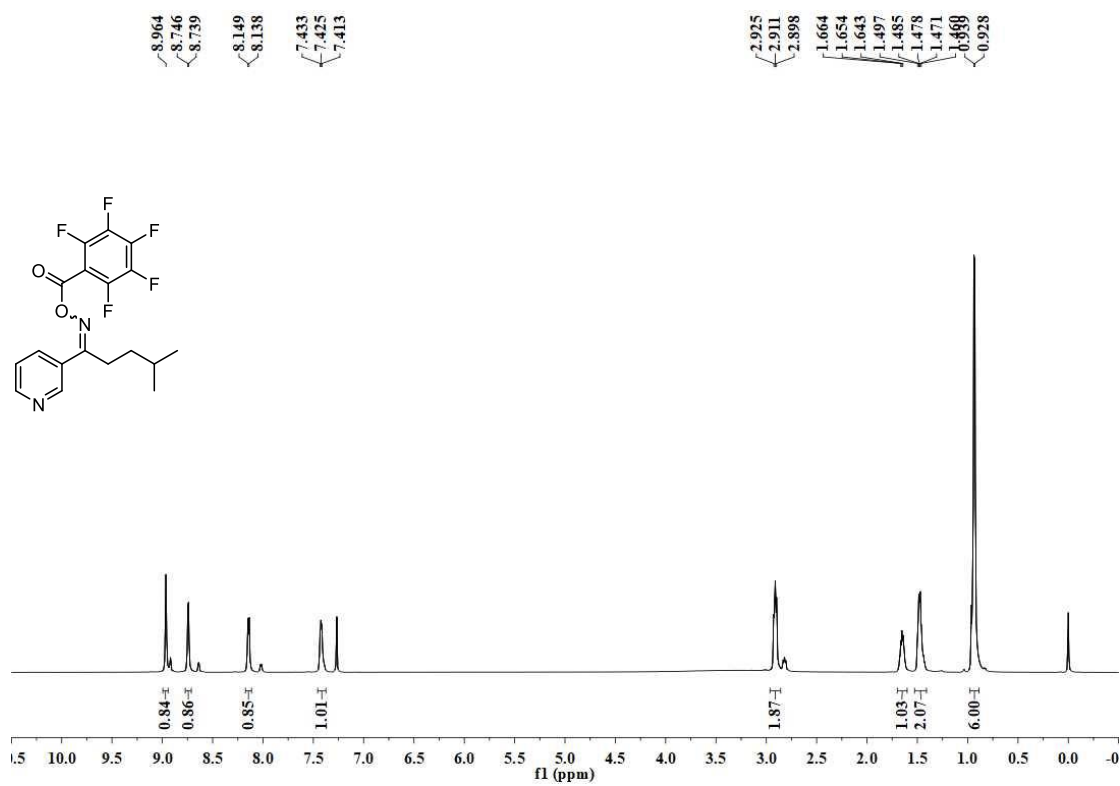

**$^{13}\text{C}$  NMR Spectrum of S105 (151 MHz,  $\text{CDCl}_3$ )**

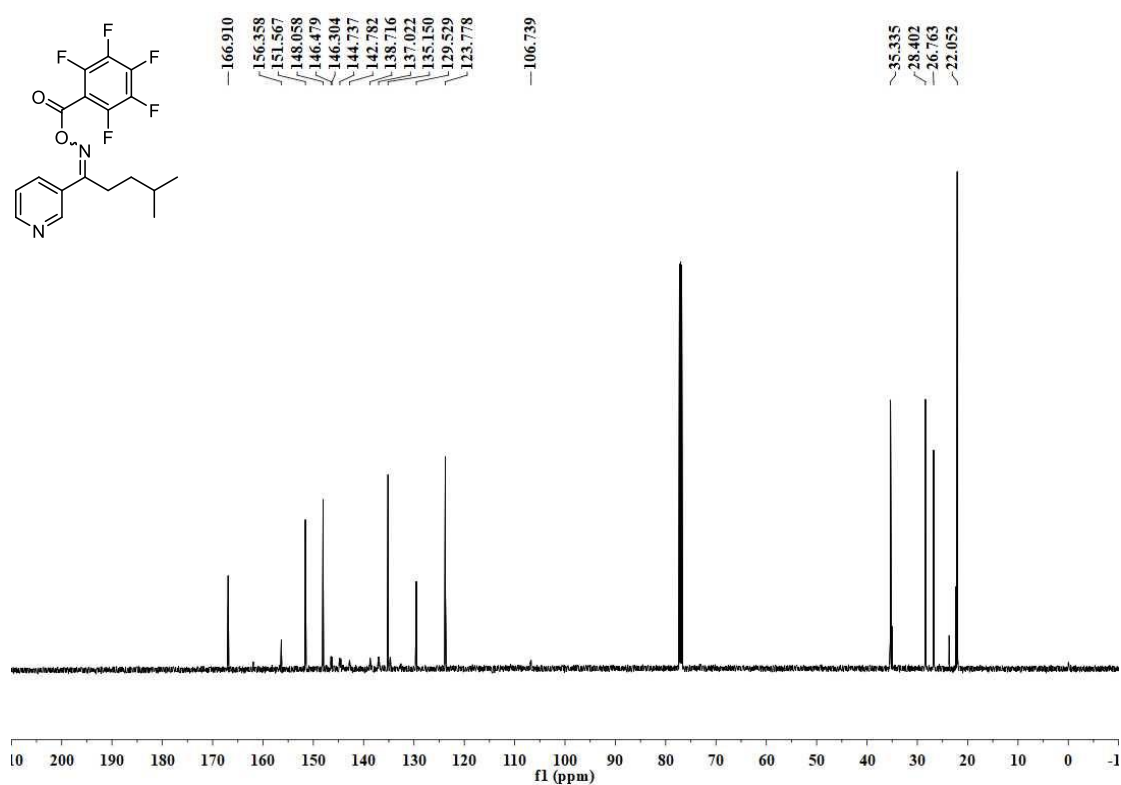

**$^{19}\text{F}$  NMR Spectrum of S105 (565 MHz,  $\text{CDCl}_3$ )**

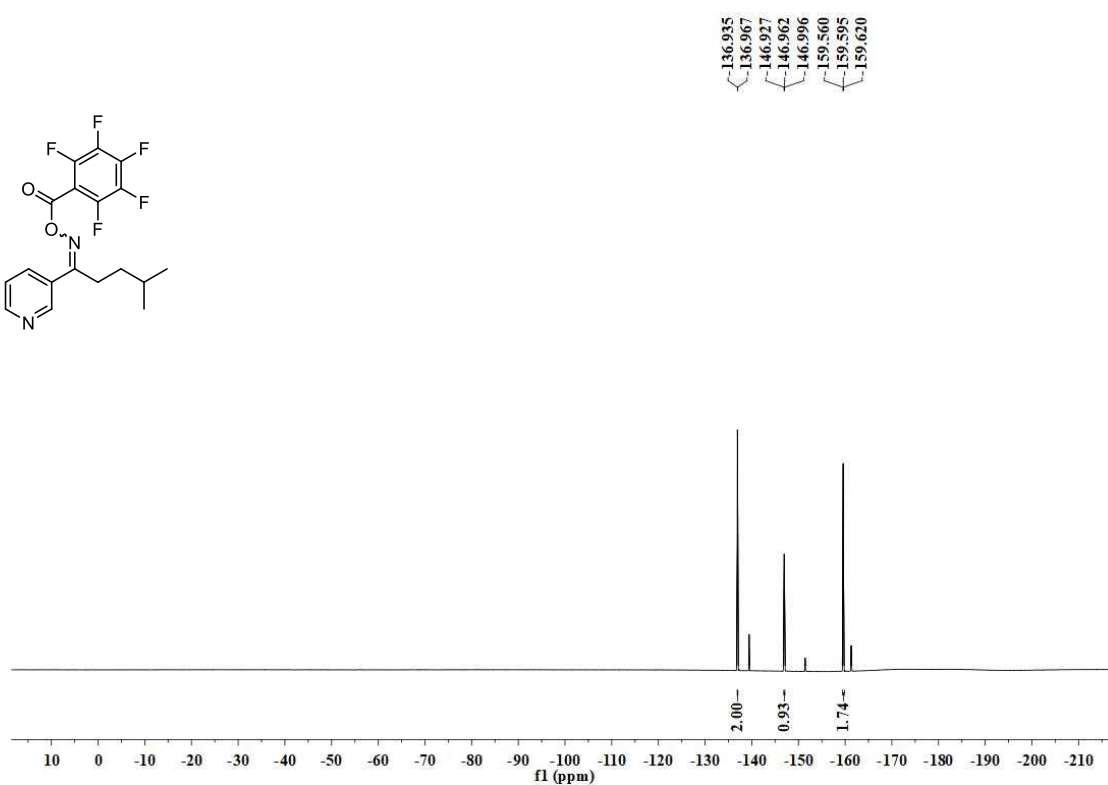

**<sup>1</sup>H NMR Spectrum of S106 (600 MHz, CDCl<sub>3</sub>)**

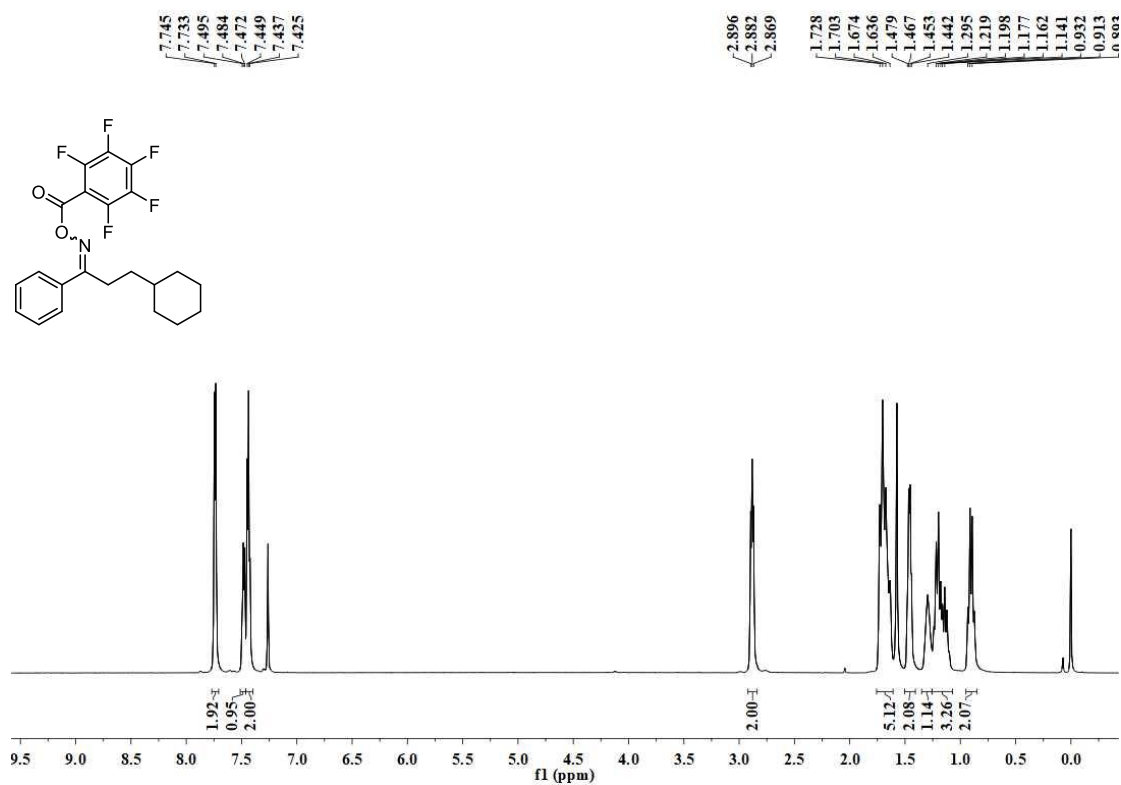

**<sup>13</sup>C NMR Spectrum of S106 (151 MHz, CDCl<sub>3</sub>)**

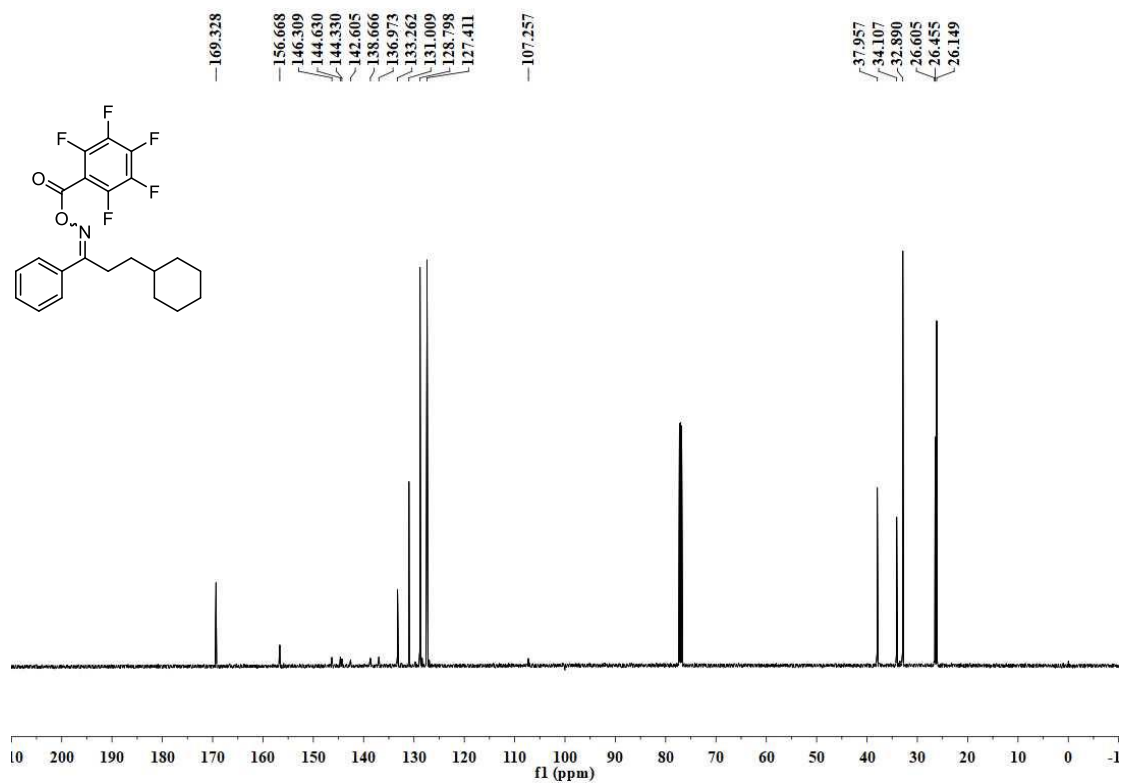

**$^{19}\text{F}$  NMR Spectrum of S106 (565 MHz,  $\text{CDCl}_3$ )**

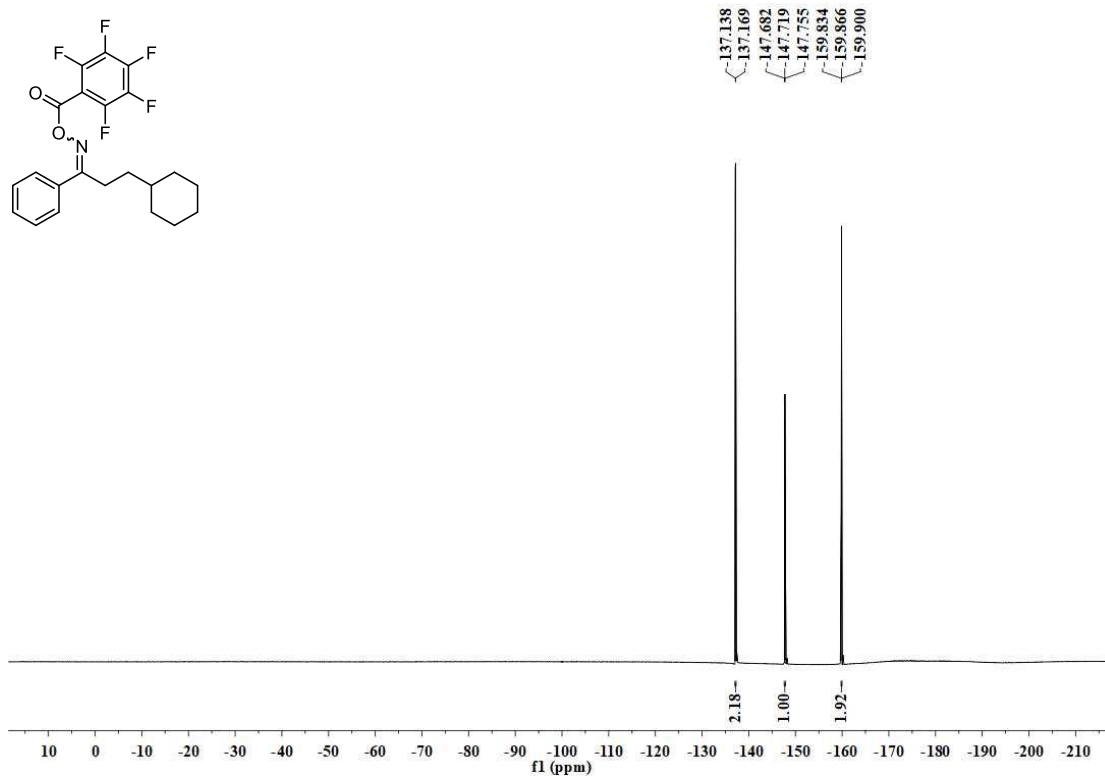

**$^1\text{H}$  NMR Spectrum of S121 (600 MHz,  $\text{CDCl}_3$ )**

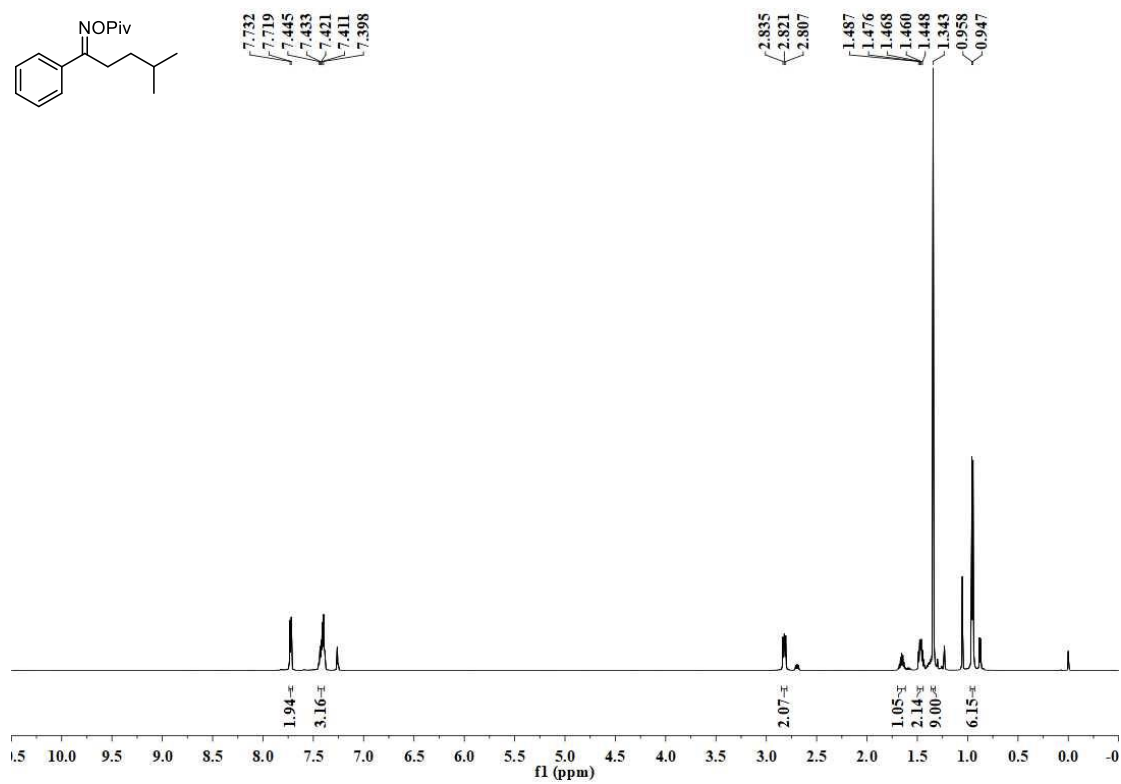

**<sup>13</sup>C NMR Spectrum of S121 (151 MHz, CDCl<sub>3</sub>)**

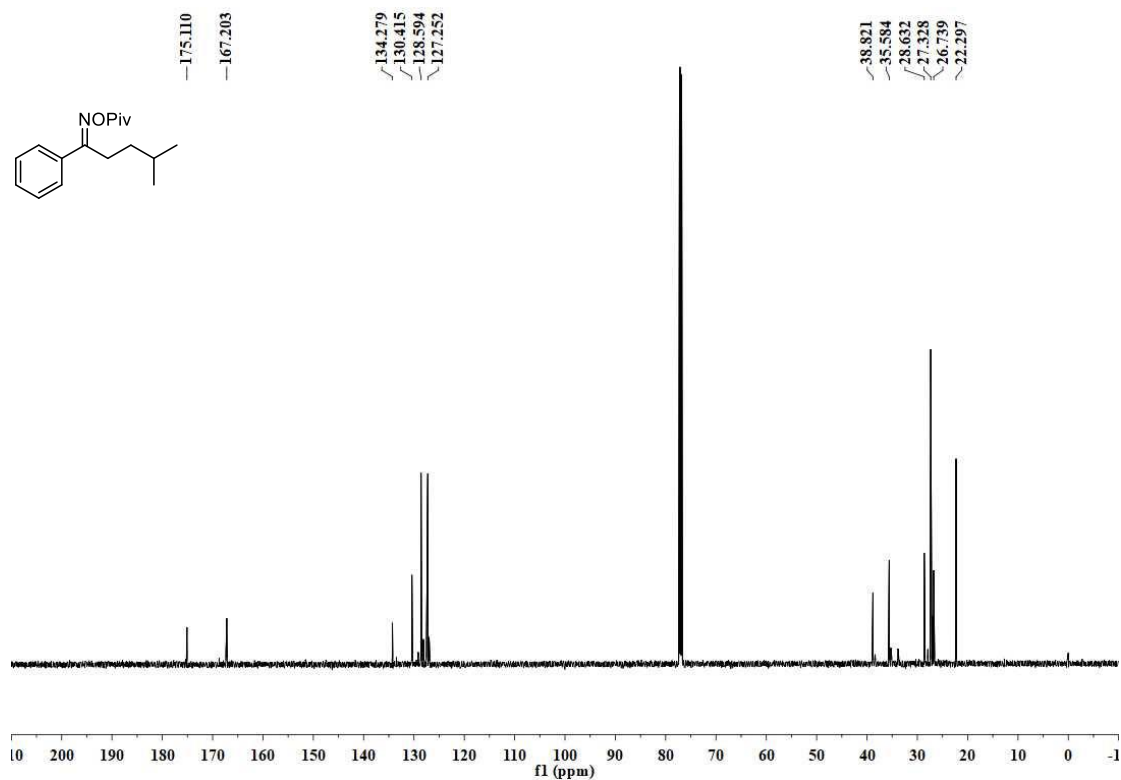

**<sup>1</sup>H NMR Spectrum of 4-methyl-1-phenyl-2-vinylpentan-1-one (600 MHz, CDCl<sub>3</sub>)**

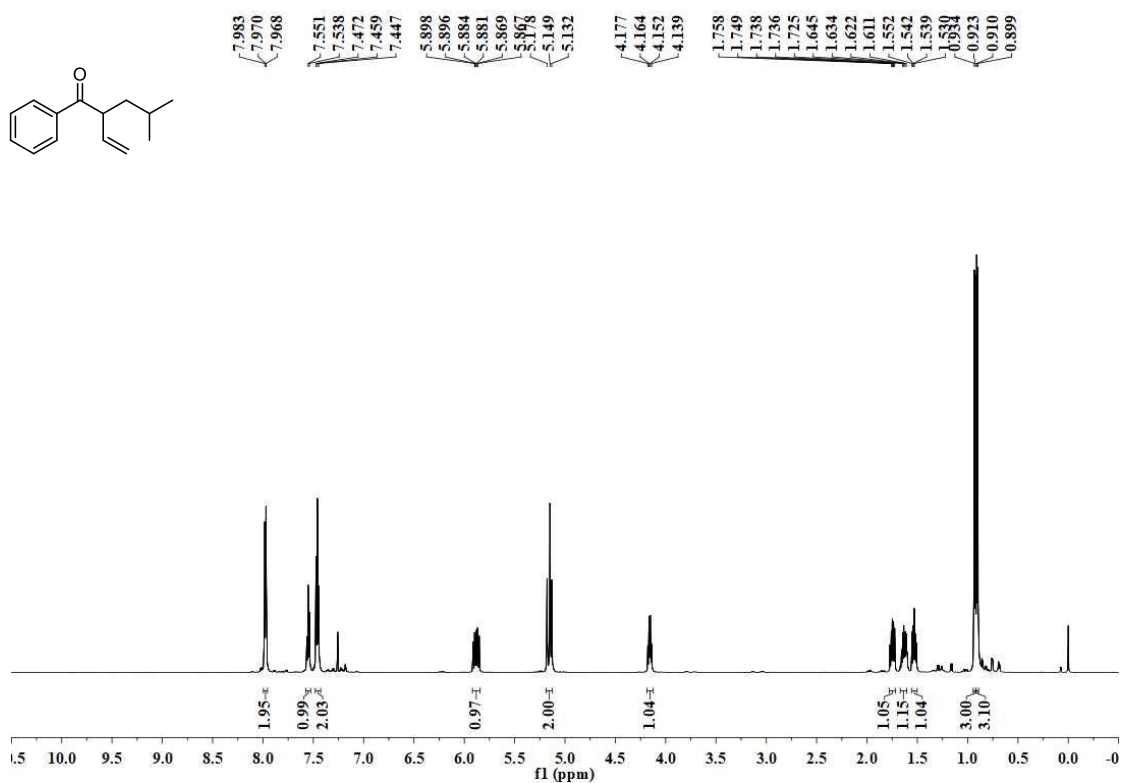



**$^{13}\text{C}$  NMR Spectrum of 4-methyl-1-phenyl-2-vinylpentan-1-one (151 MHz,  $\text{CDCl}_3$ )**

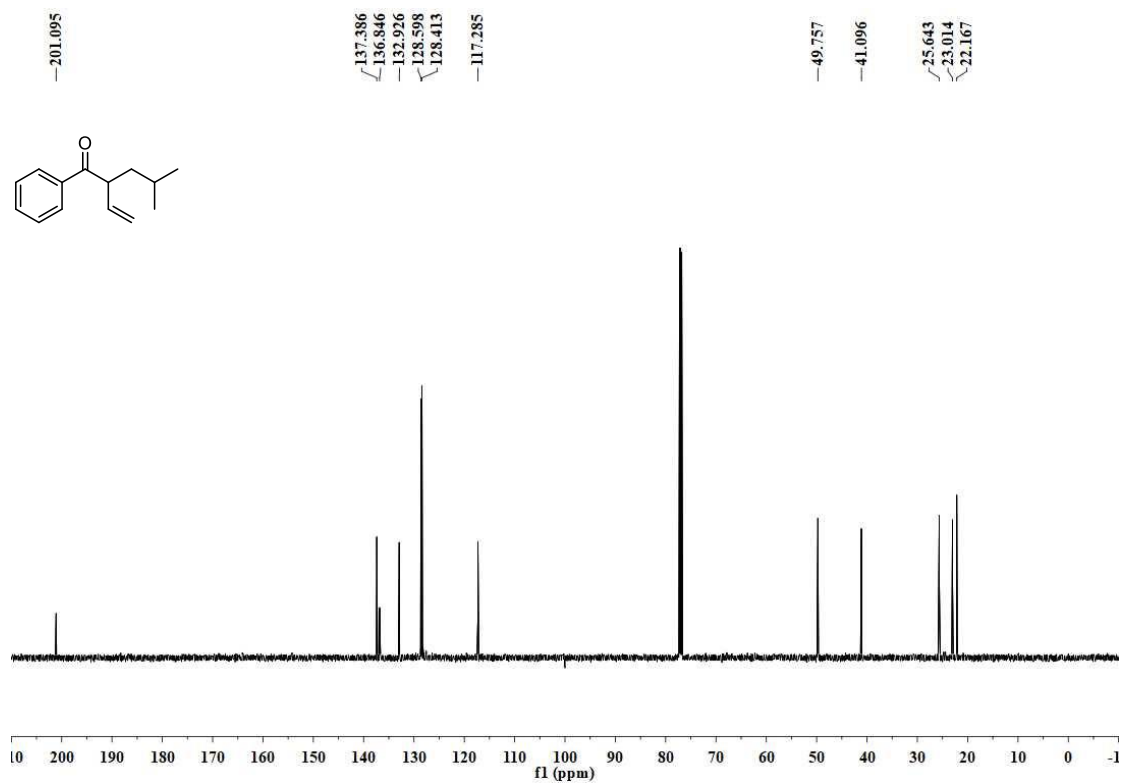

**$^1\text{H}$  NMR Spectrum of 73 (600 MHz,  $\text{CDCl}_3$ )**

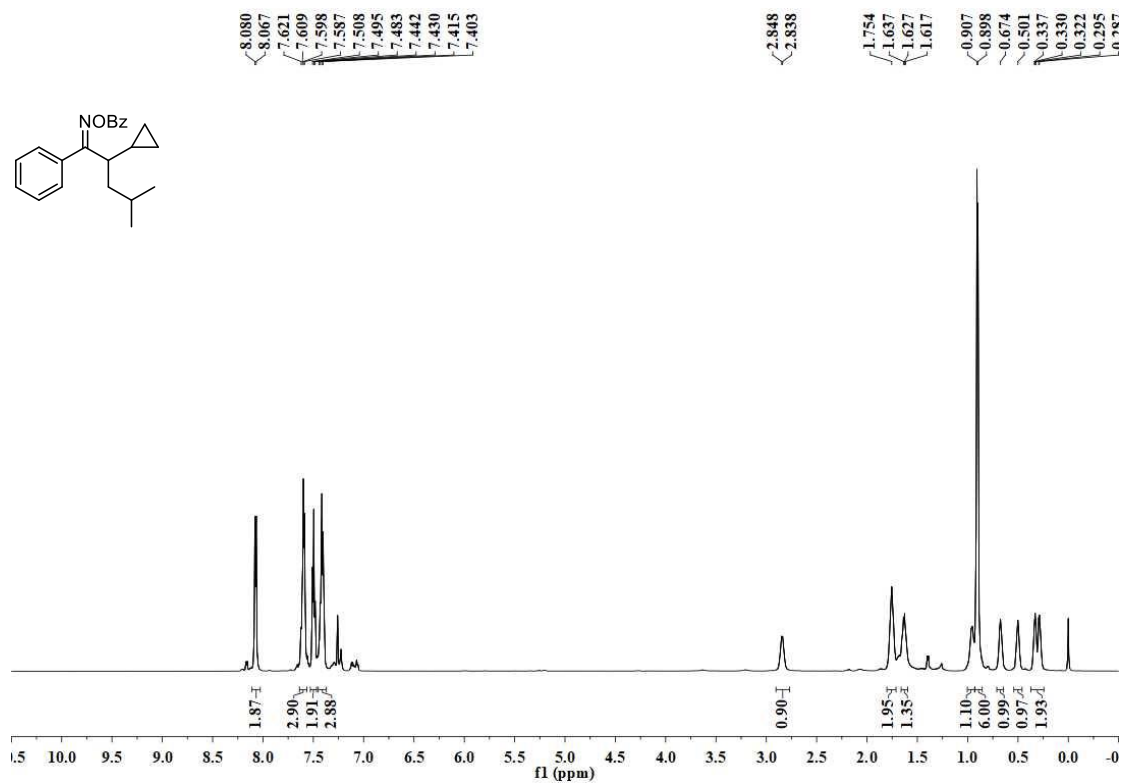

Chemical structure of the compound is shown above the spectrum. The spectrum displays peaks corresponding to the chemical shifts (ppm) listed on the right:

- 171.610
- 163.922
- 133.255
- 129.573
- 129.525
- 129.289
- 128.639
- 128.409
- 128.256
- 42.087
- 25.971
- 23.001
- 22.641
- 14.077
- 6.858
- 3.995

Chemical structure: CC(C)C(C)(C1=CC=CC=C1)C(=O)NOC2=CC=CC=C2

**$^{13}\text{C}$  NMR Spectrum of S41 (151 MHz,  $\text{CDCl}_3$ )**

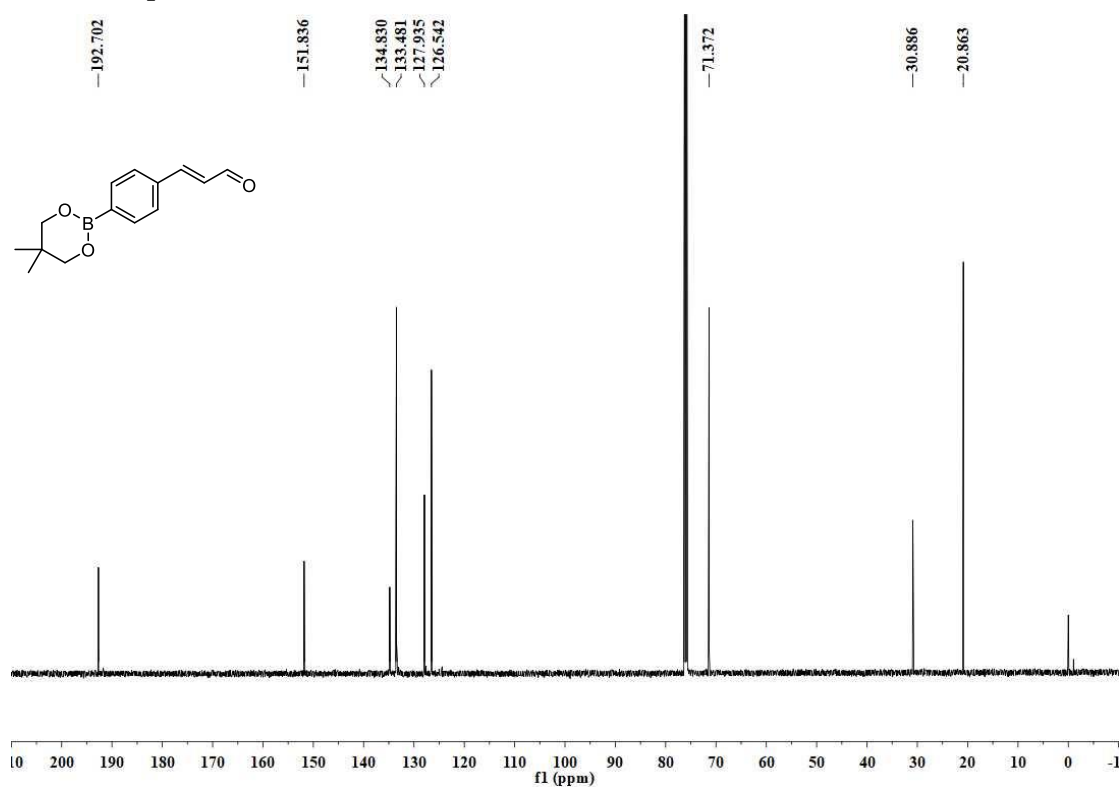

**$^1\text{H}$  NMR Spectrum of S42 (600 MHz,  $\text{CDCl}_3$ )**

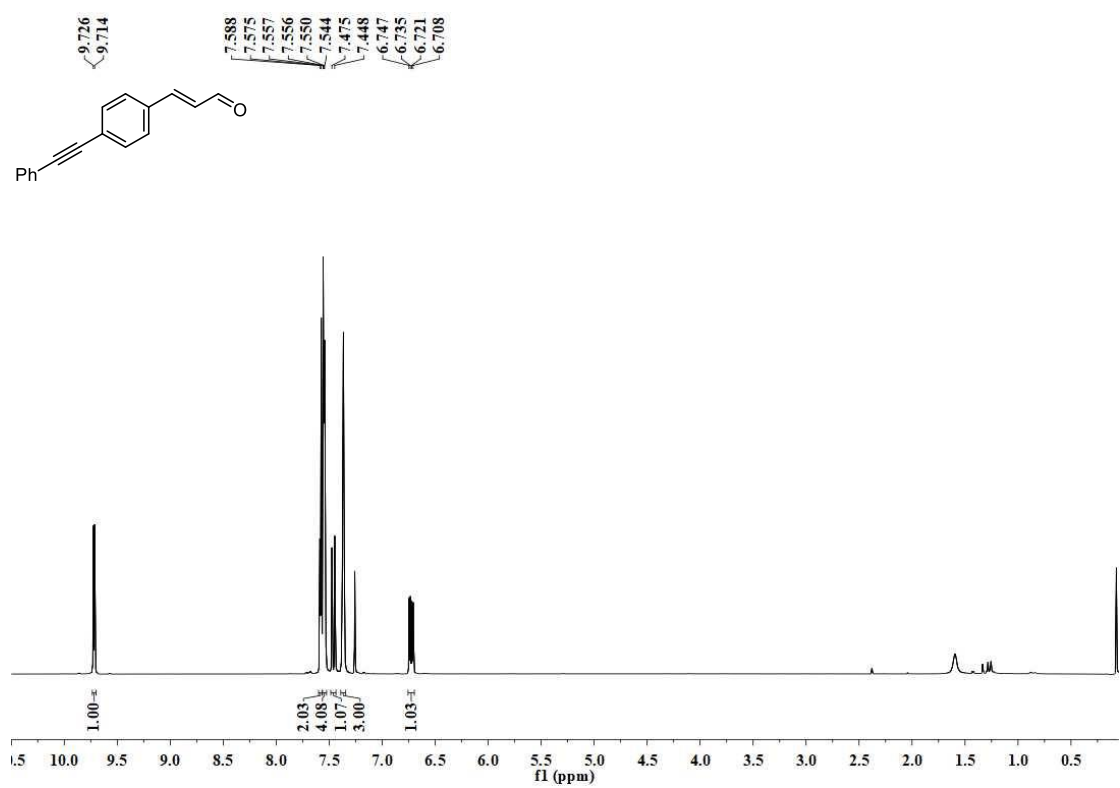

**$^{13}\text{C}$  NMR Spectrum of S42 (151 MHz,  $\text{CDCl}_3$ )**

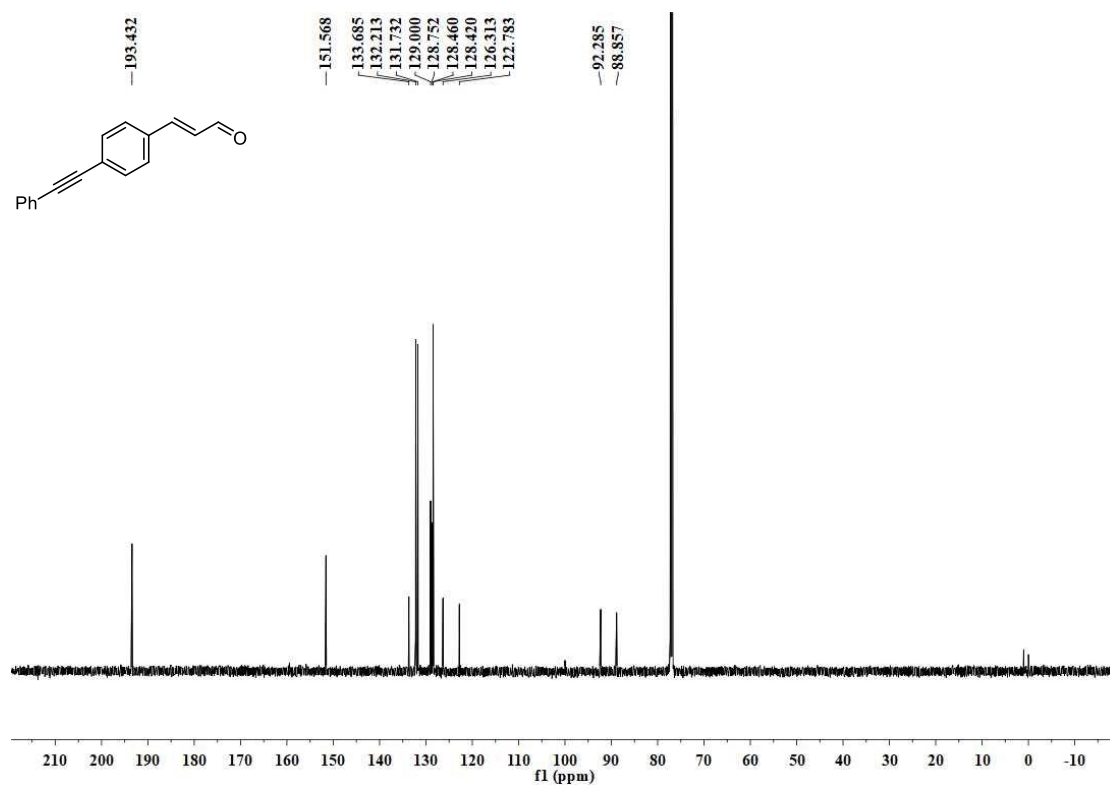

**$^1\text{H}$  NMR Spectrum of S46 (600 MHz,  $\text{CDCl}_3$ )**

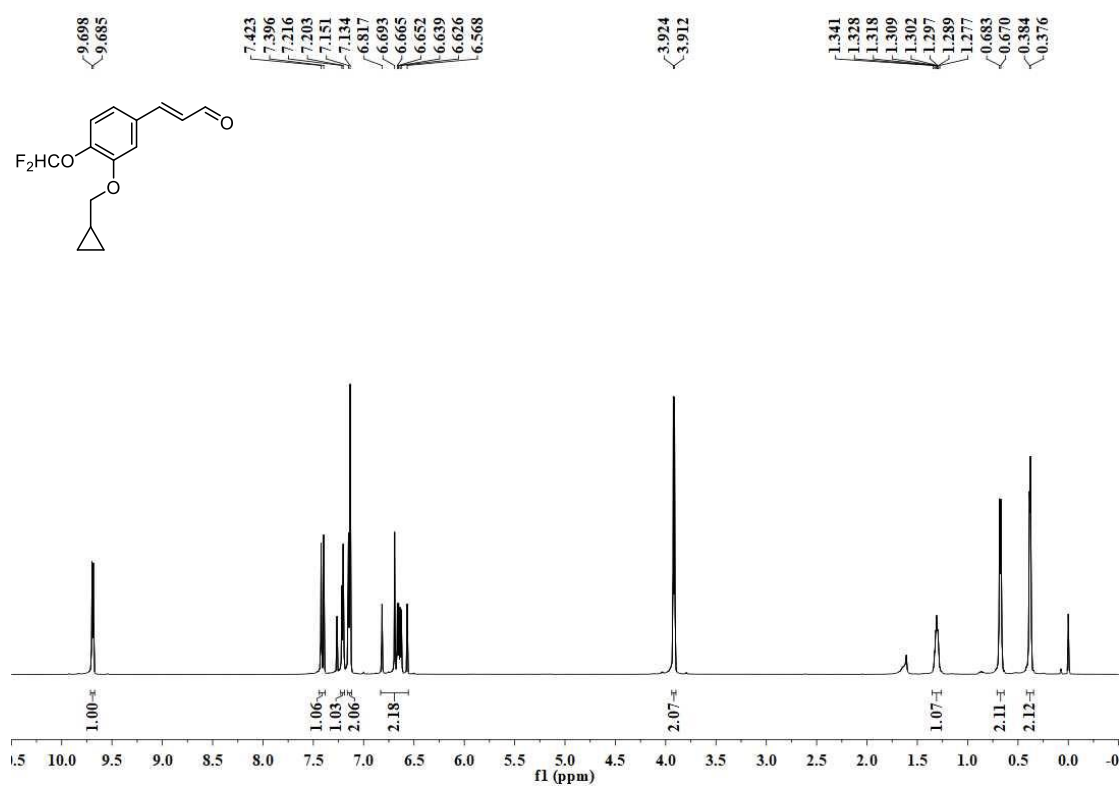

**$^{13}\text{C}$  NMR Spectrum of S46 (151 MHz,  $\text{CDCl}_3$ )**

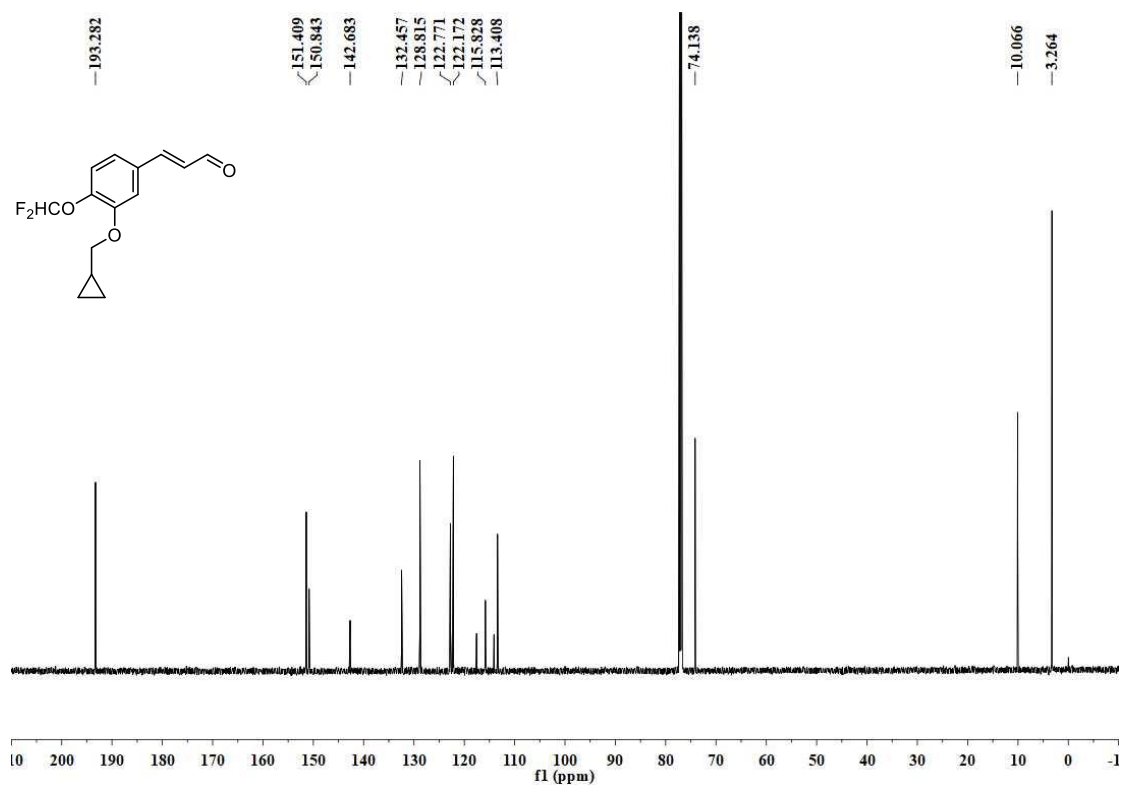

**$^{19}\text{F}$  NMR Spectrum of S46 (565 MHz,  $\text{CDCl}_3$ )**

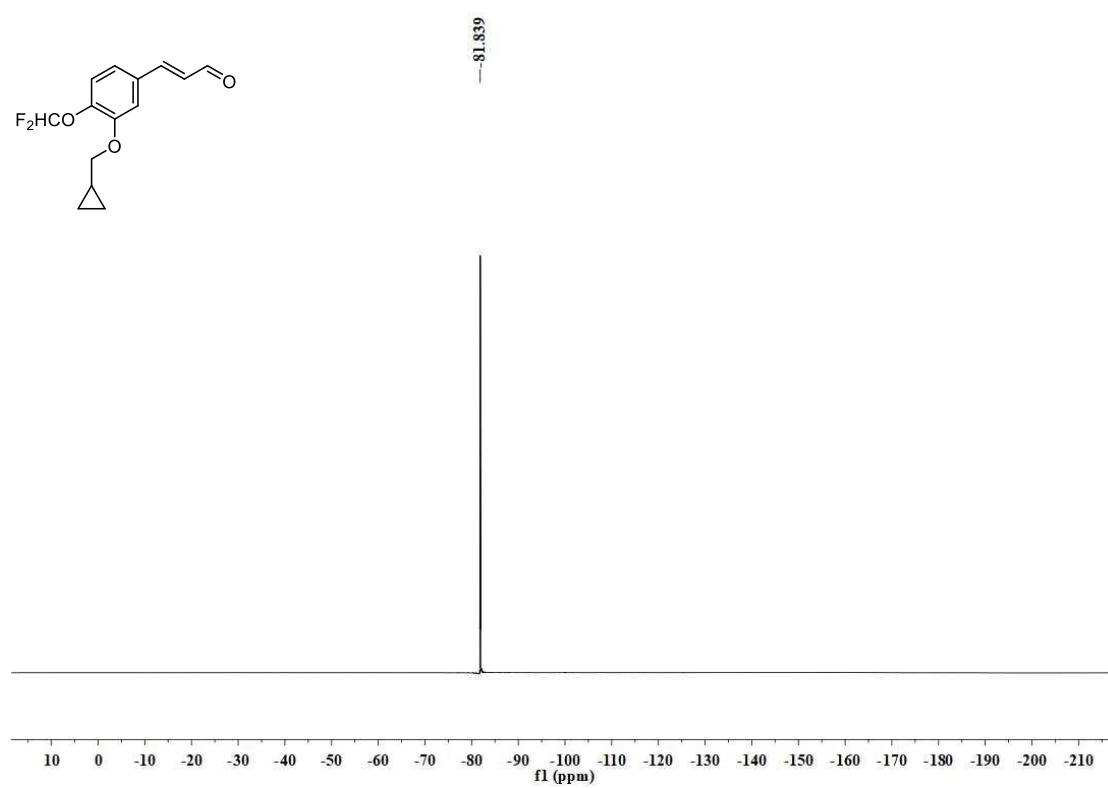

**<sup>1</sup>H NMR Spectrum of S47 (600 MHz, CDCl<sub>3</sub>)**

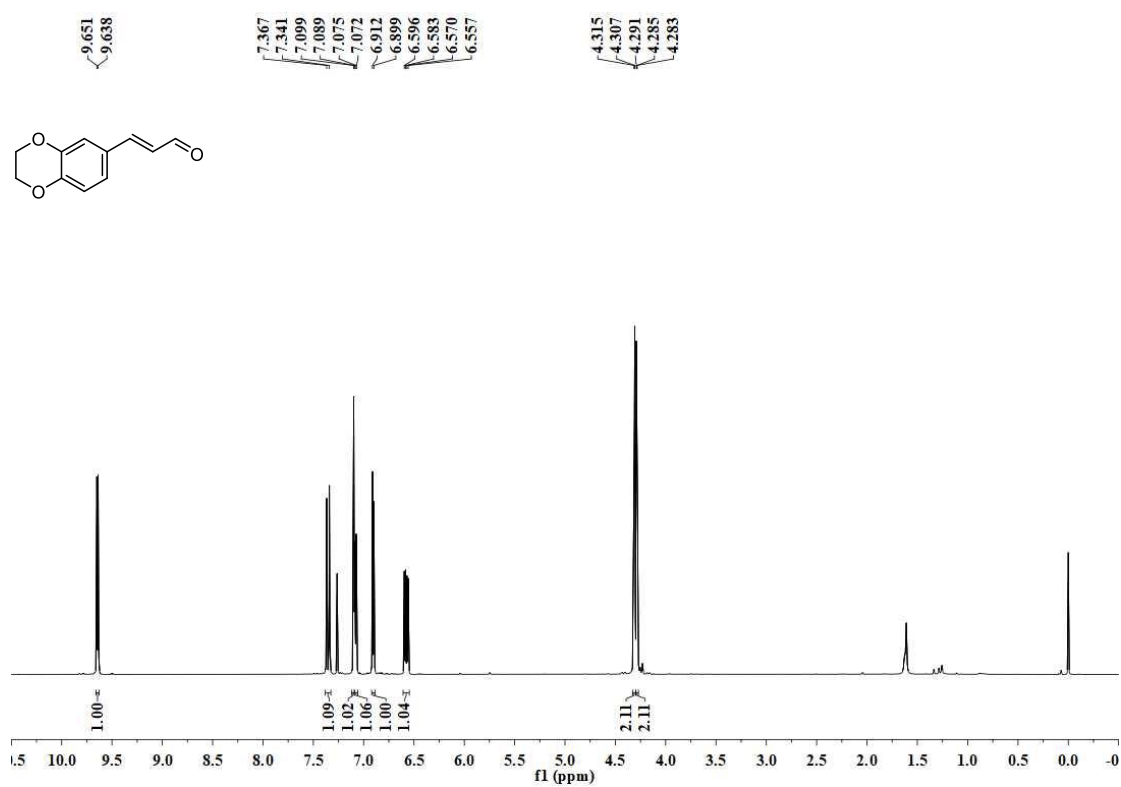

**<sup>13</sup>C NMR Spectrum of S47 (151 MHz, CDCl<sub>3</sub>)**

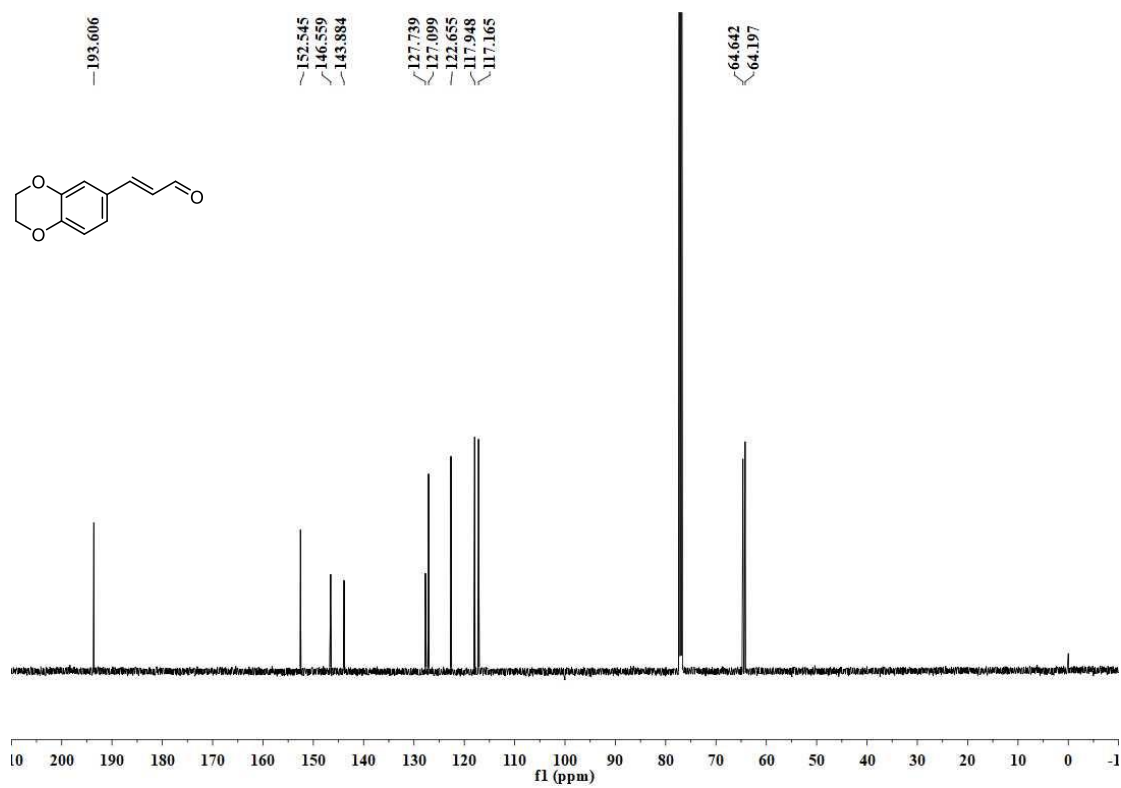

**<sup>1</sup>H NMR Spectrum of S53 (600 MHz, CDCl<sub>3</sub>)**

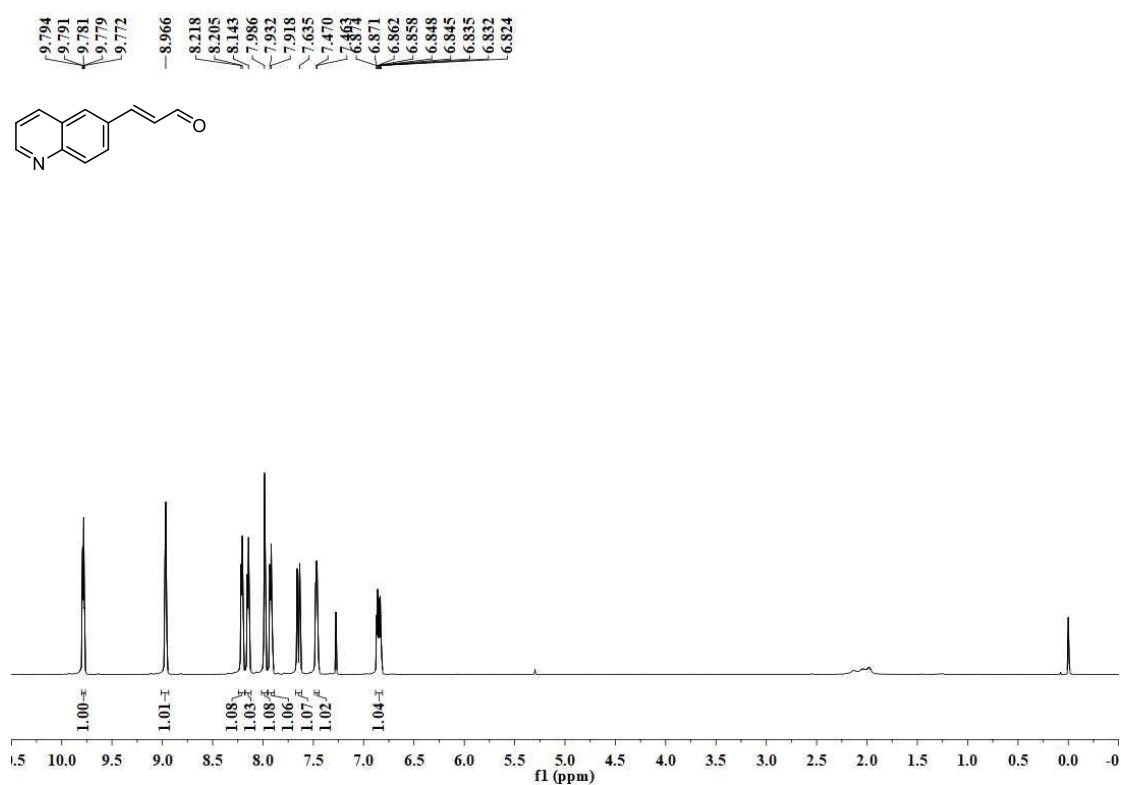

**<sup>13</sup>C NMR Spectrum of S53 (151 MHz, CDCl<sub>3</sub>)**

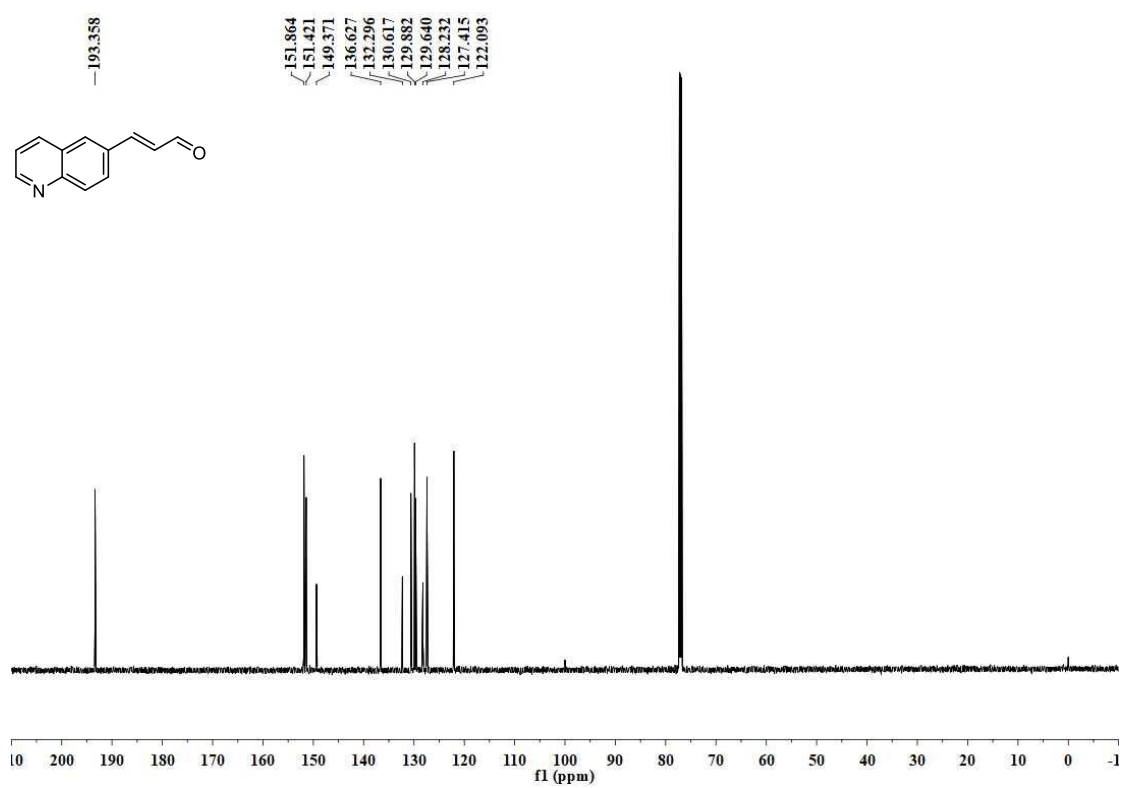

**<sup>1</sup>H NMR Spectrum of S60 (600 MHz, CDCl<sub>3</sub>)**

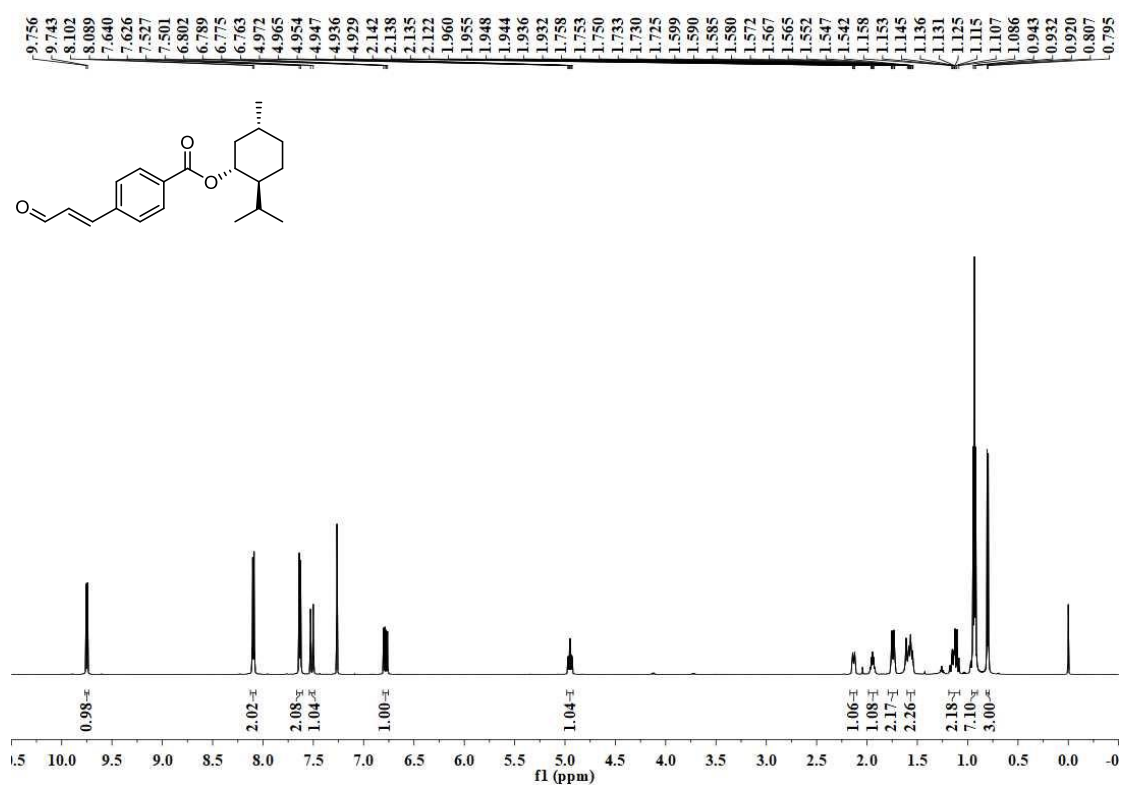

**<sup>13</sup>C NMR Spectrum of S60 (151 MHz, CDCl<sub>3</sub>)**

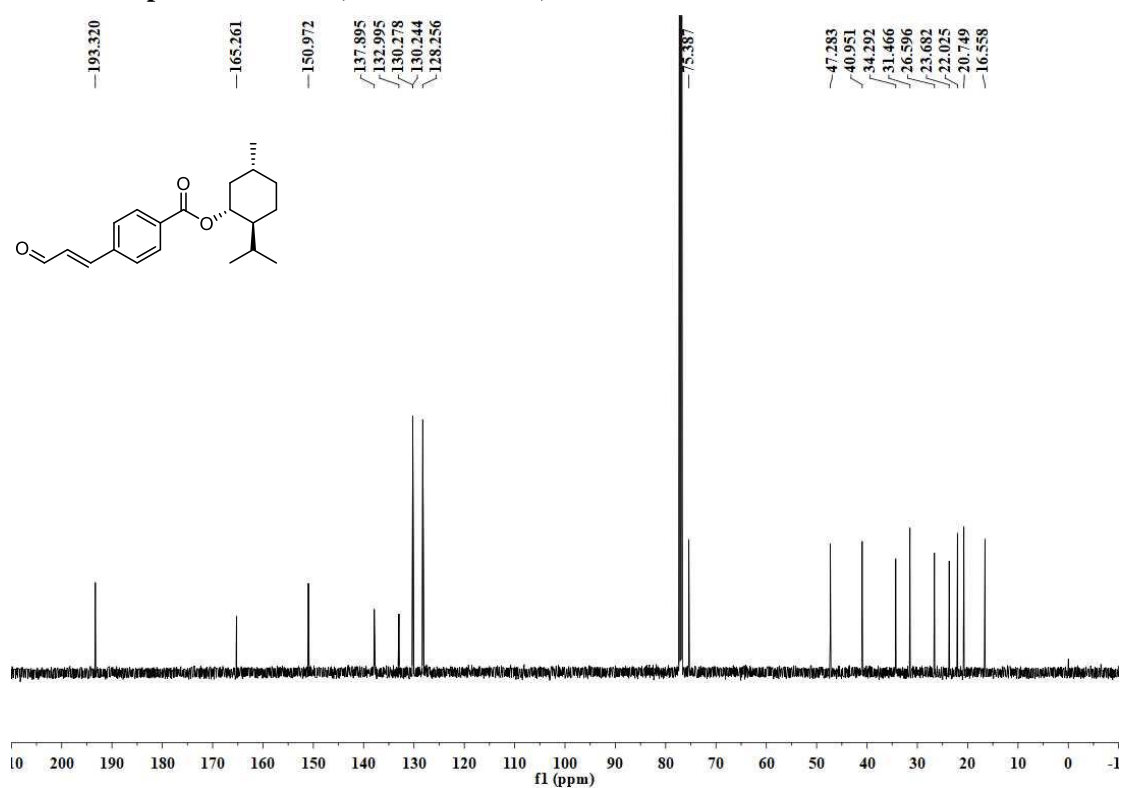



**<sup>1</sup>H NMR Spectrum of 80 (600 MHz, CDCl<sub>3</sub>)**

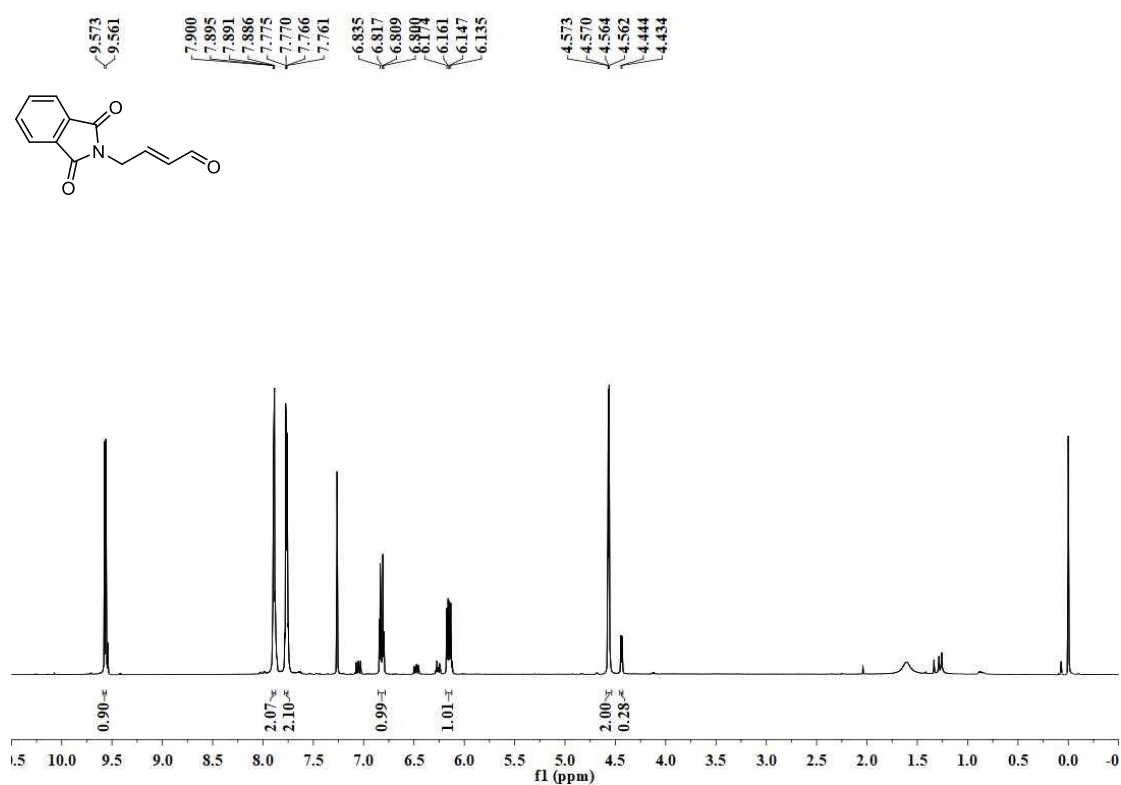

**<sup>13</sup>C NMR Spectrum of 80 (151 MHz, CDCl<sub>3</sub>)**

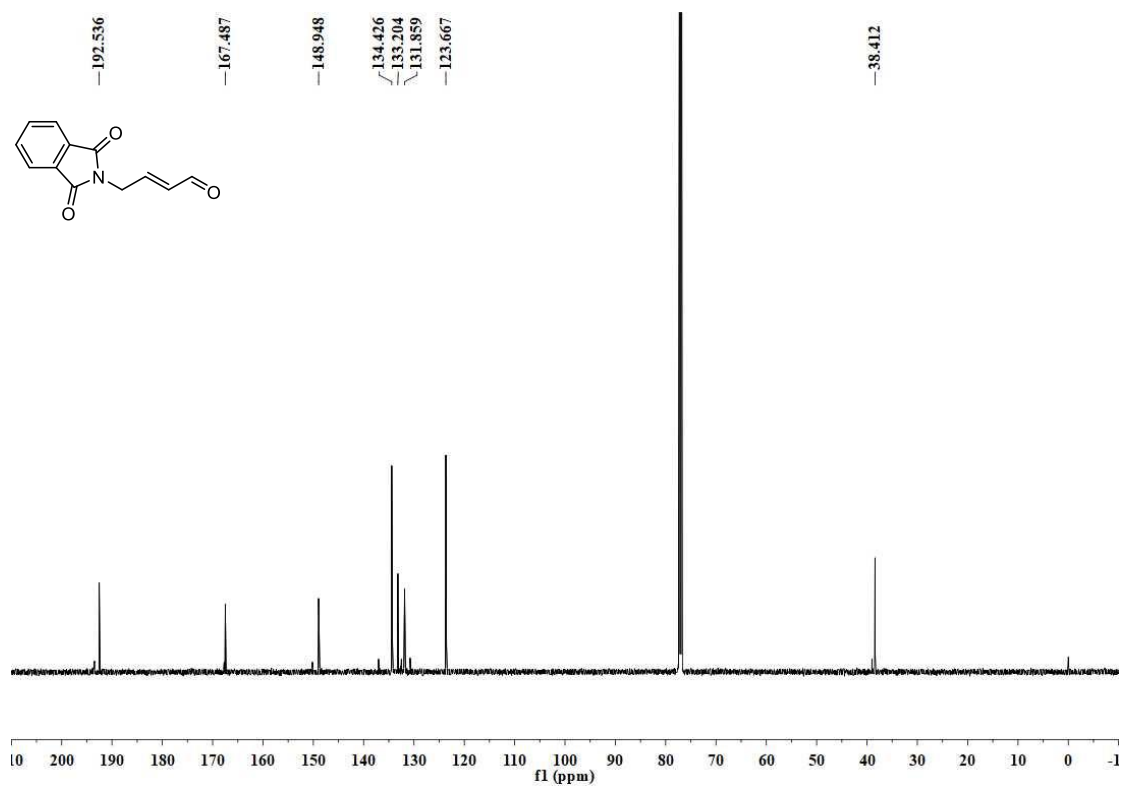

**<sup>1</sup>H NMR Spectrum of S62 (600 MHz, CDCl<sub>3</sub>)**

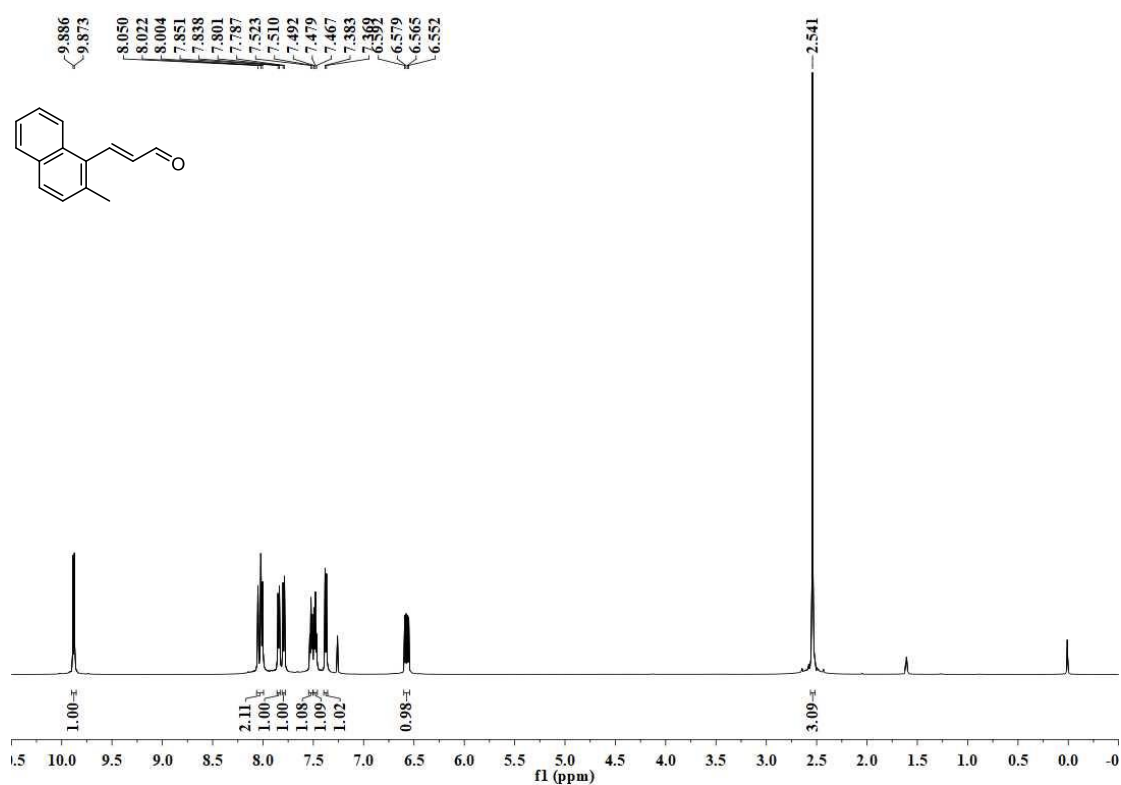

**<sup>13</sup>C NMR Spectrum of S62 (151 MHz, CDCl<sub>3</sub>)**

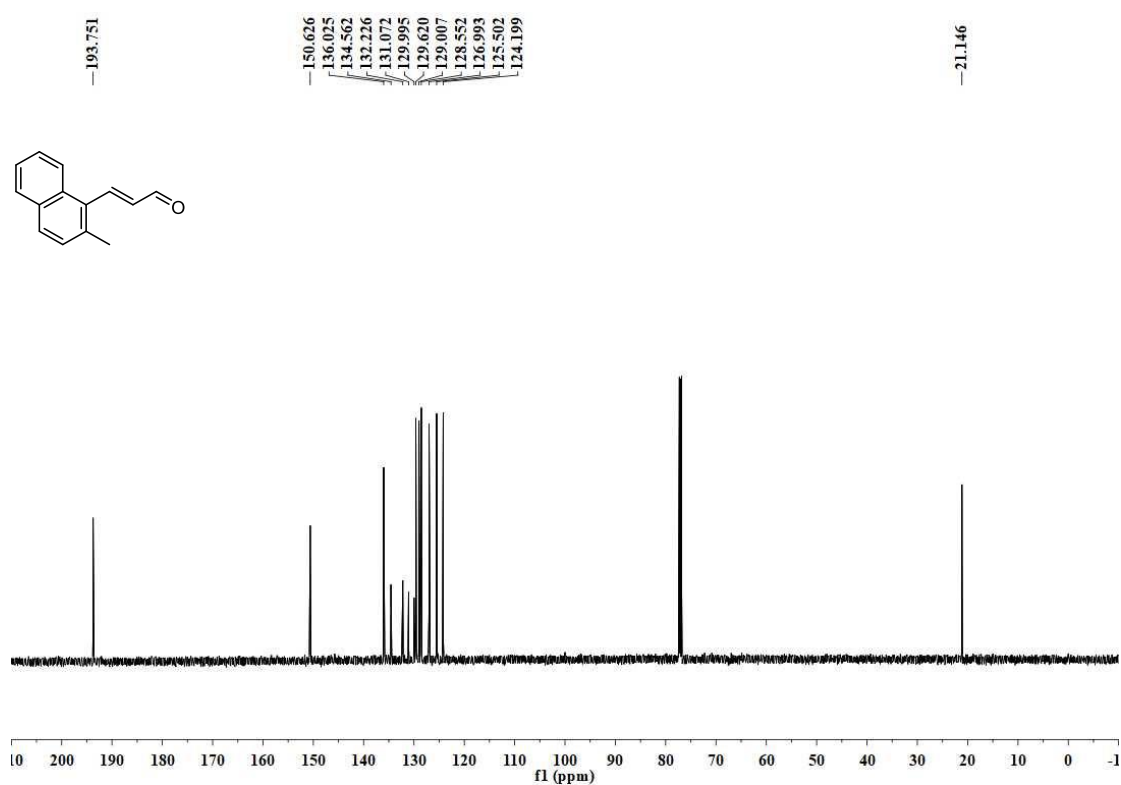

**<sup>1</sup>H NMR Spectrum of 96 (600 MHz, CDCl<sub>3</sub>)**

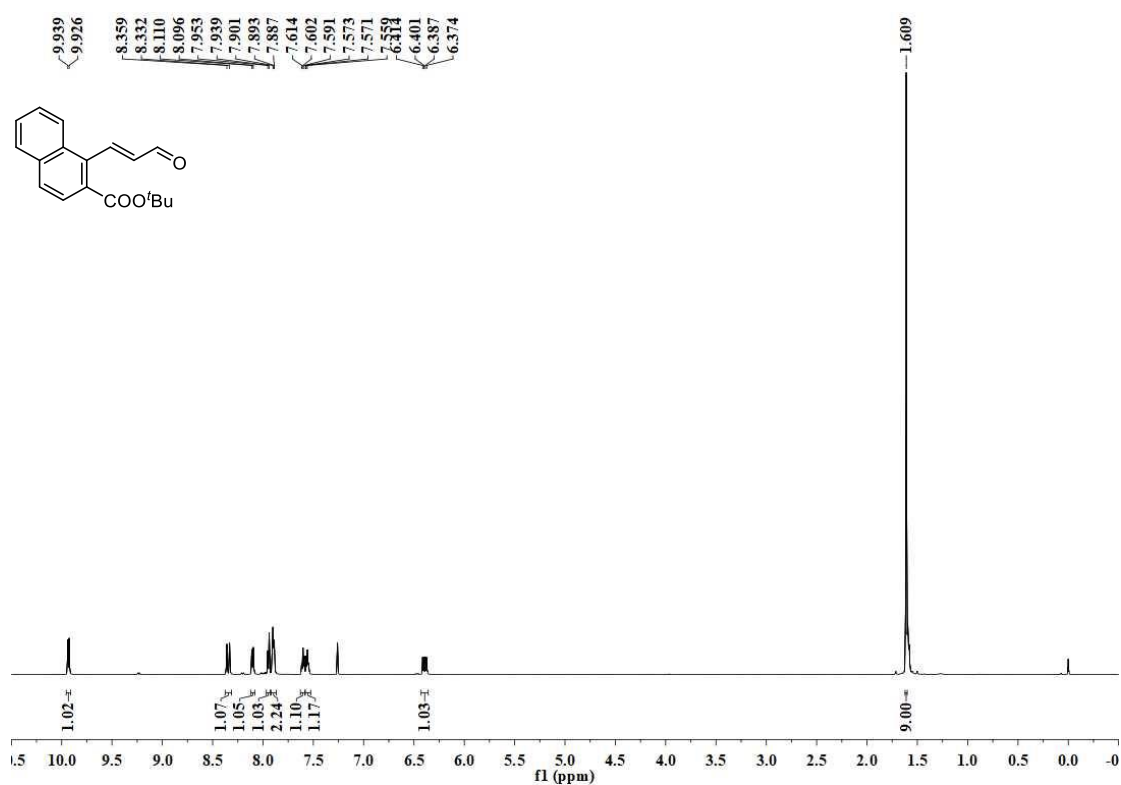

**<sup>13</sup>C NMR Spectrum of 96 (151 MHz, CDCl<sub>3</sub>)**

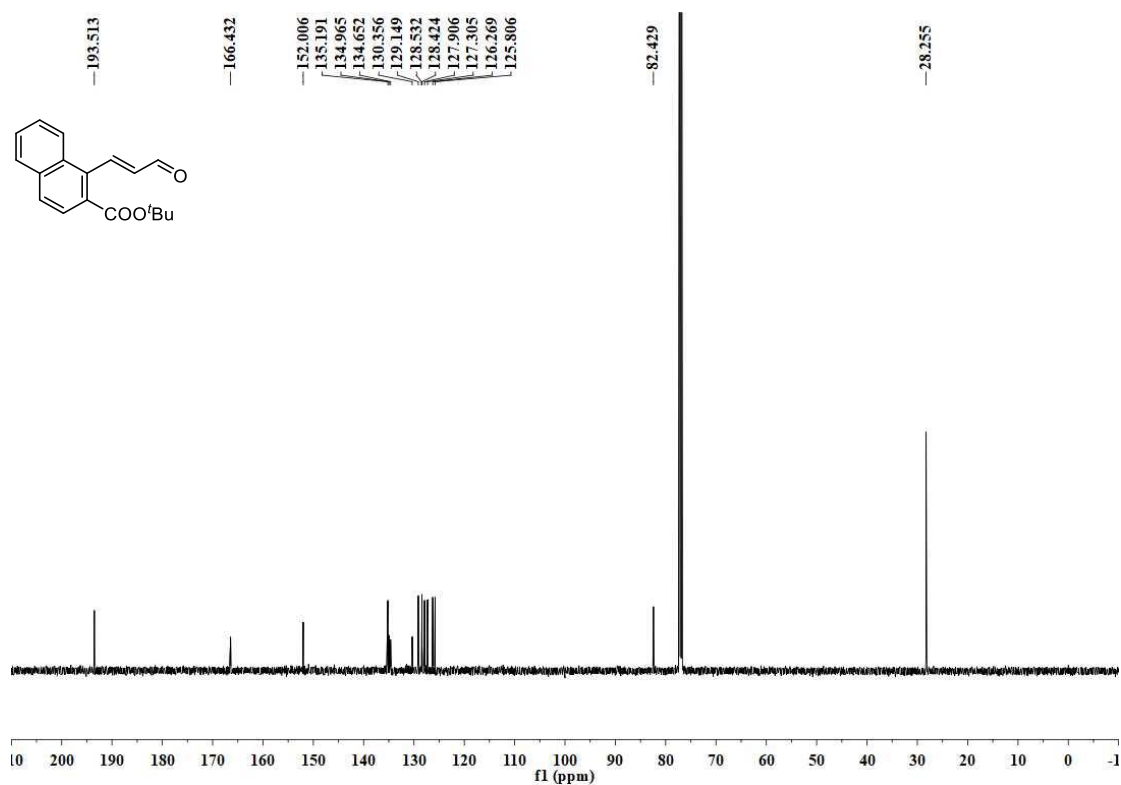

**<sup>1</sup>H NMR Spectrum of S63 (600 MHz, CDCl<sub>3</sub>)**

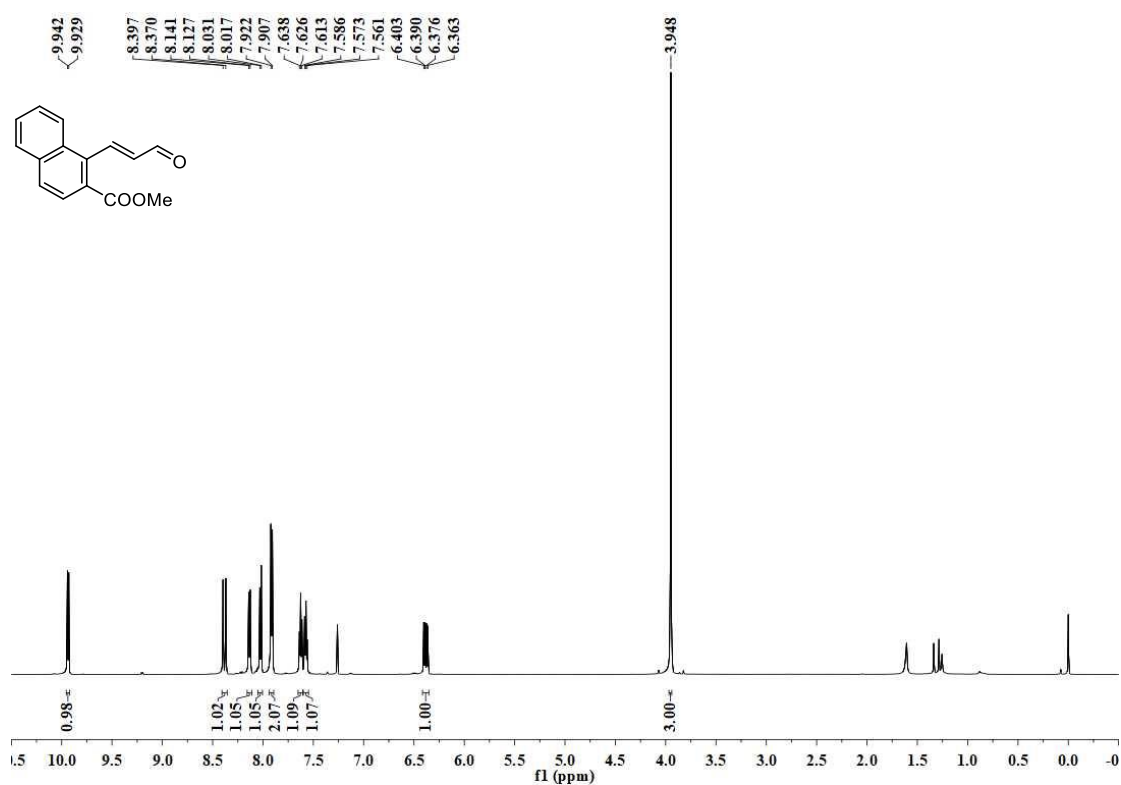

**<sup>13</sup>C NMR Spectrum of S63 (151 MHz, CDCl<sub>3</sub>)**

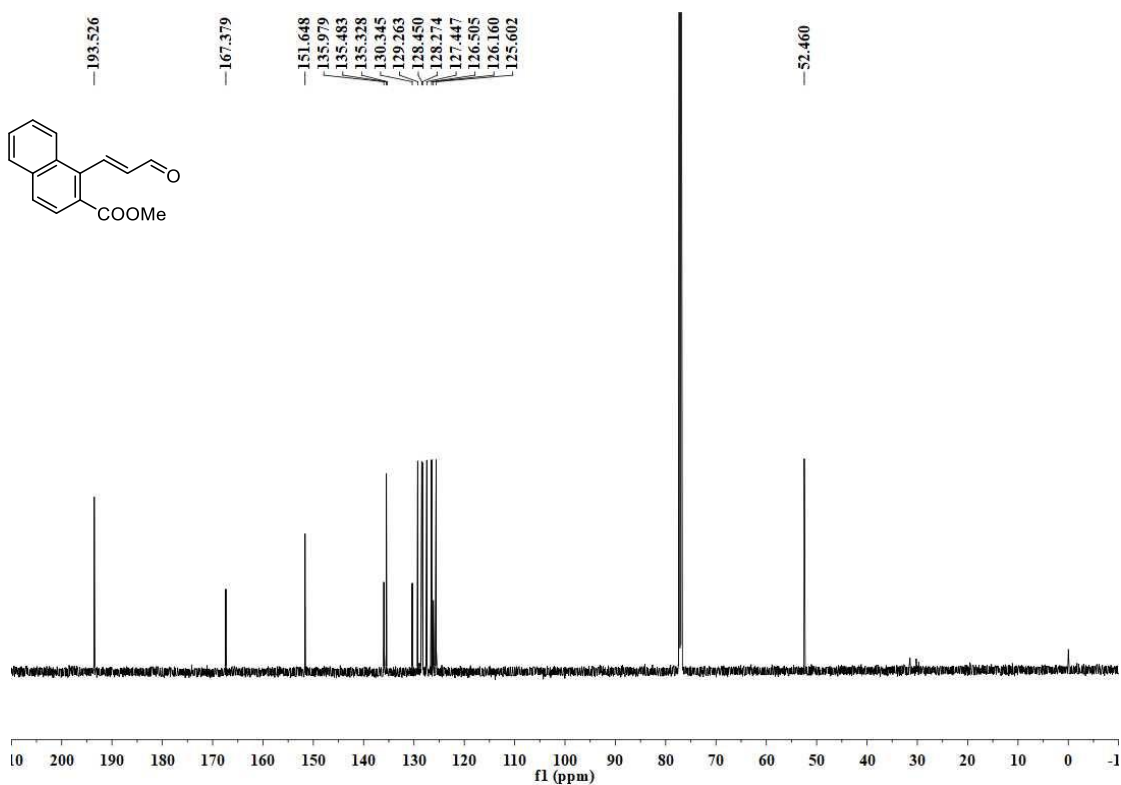

**<sup>1</sup>H NMR Spectrum of S107 (600 MHz, CDCl<sub>3</sub>)**

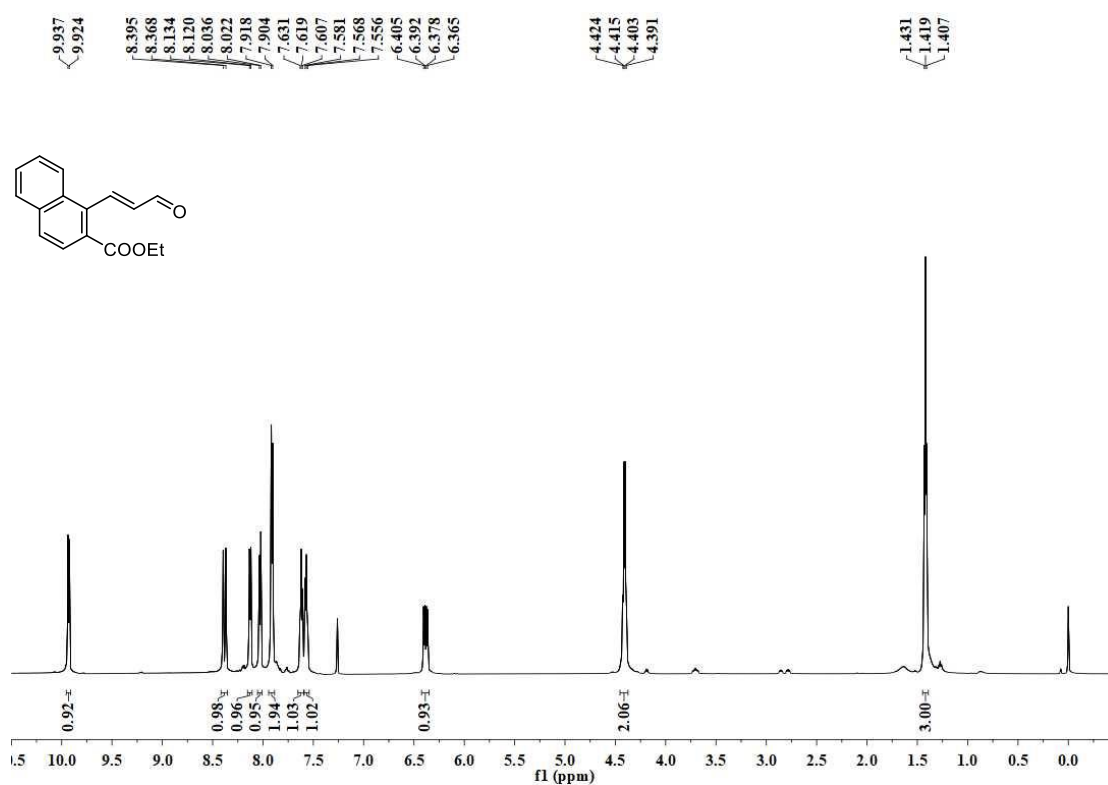

**<sup>13</sup>C NMR Spectrum of S107 (151 MHz, CDCl<sub>3</sub>)**

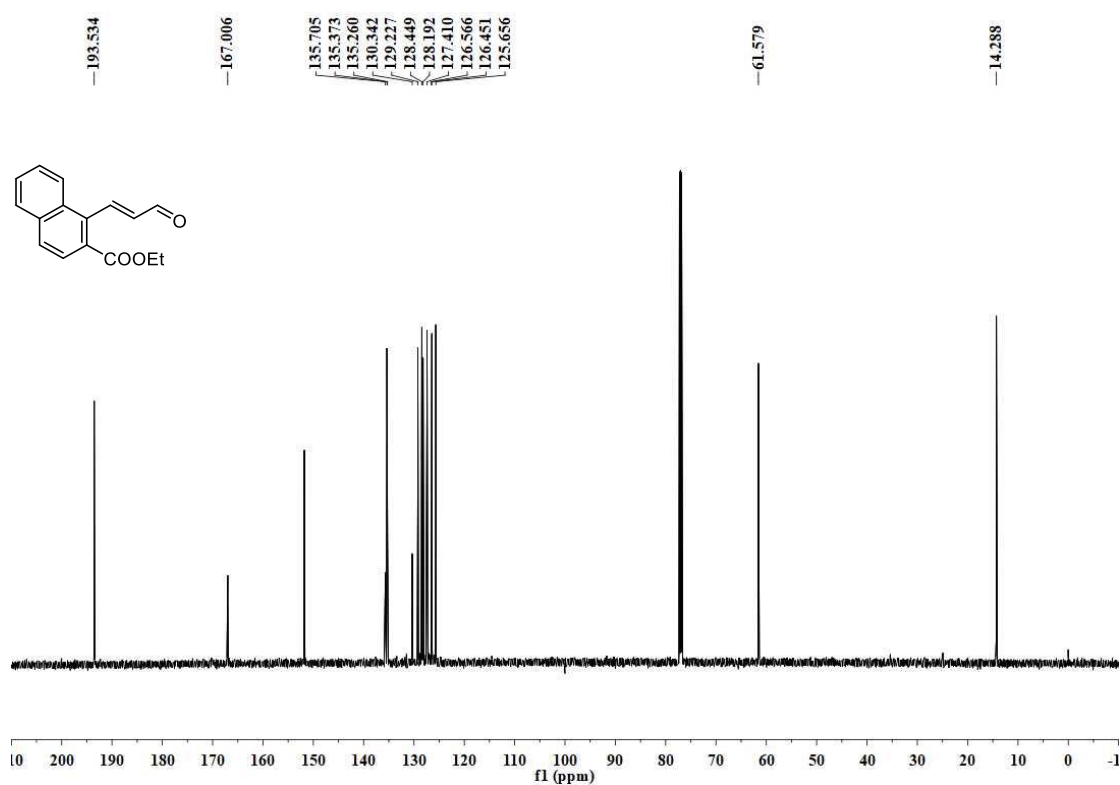

**<sup>1</sup>H NMR Spectrum of S108 (600 MHz, CDCl<sub>3</sub>)**

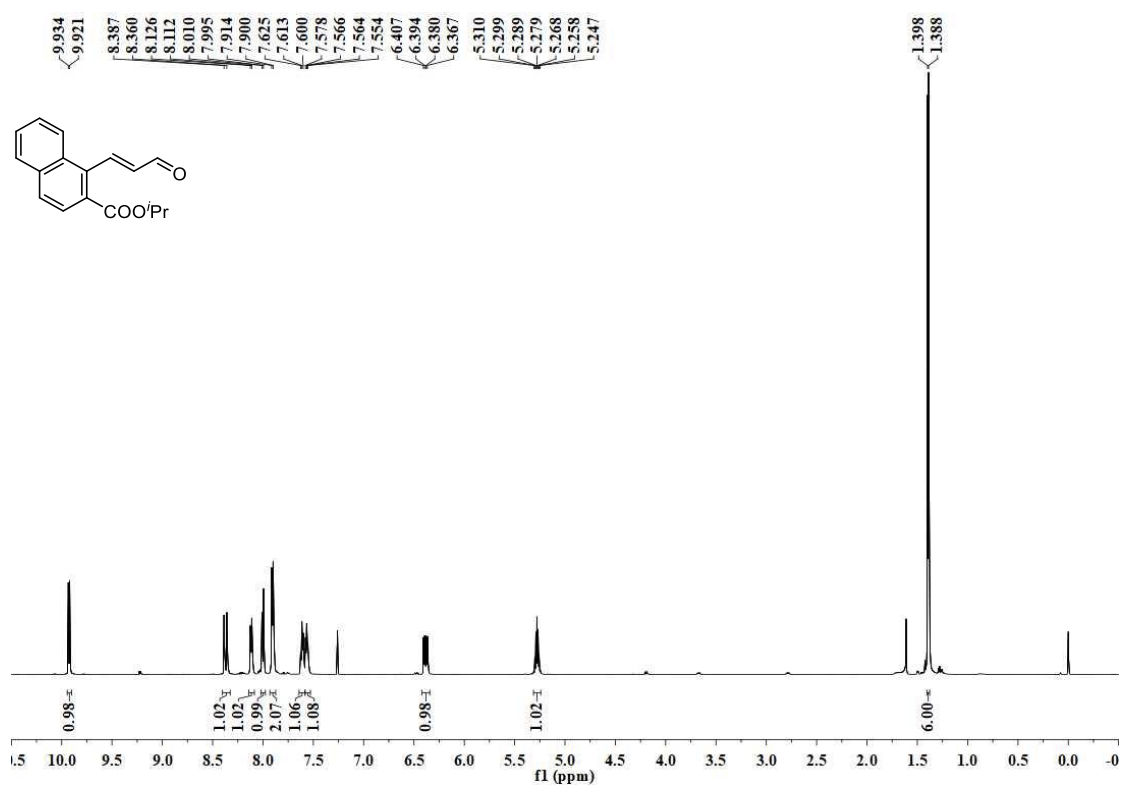

**<sup>13</sup>C NMR Spectrum of S108 (151 MHz, CDCl<sub>3</sub>)**

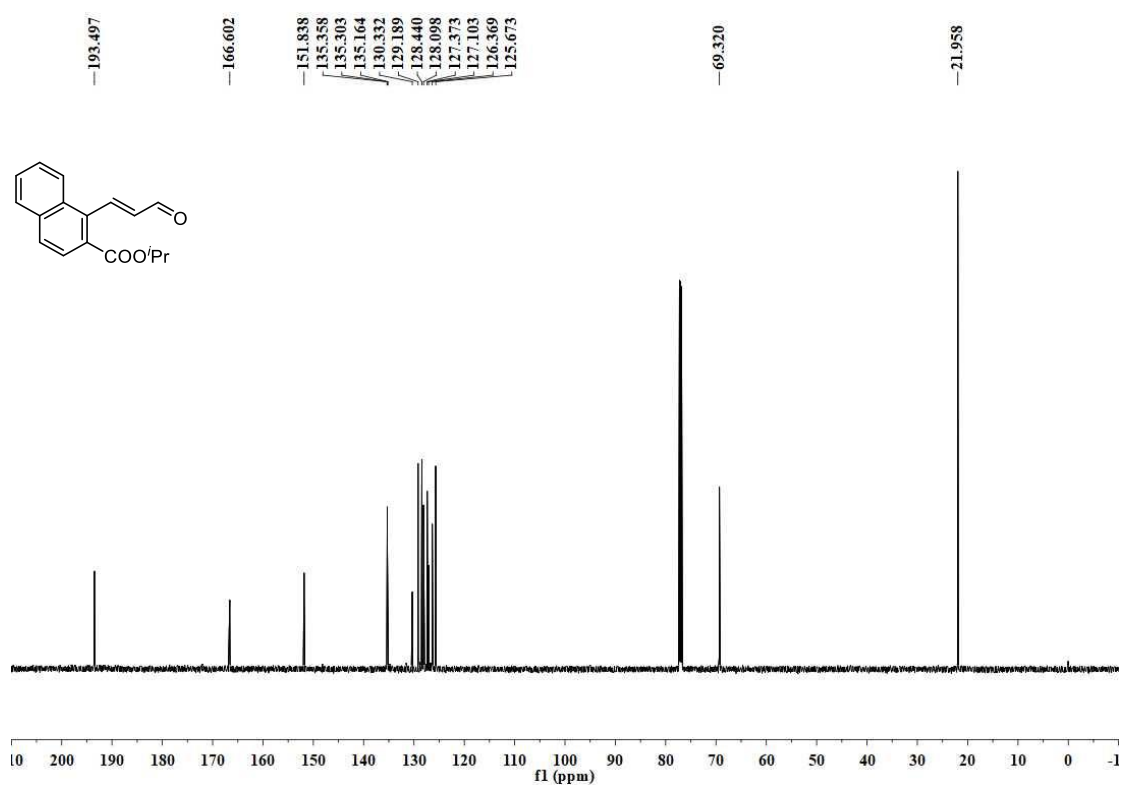

**<sup>1</sup>H NMR Spectrum of S109 (600 MHz, CDCl<sub>3</sub>)**

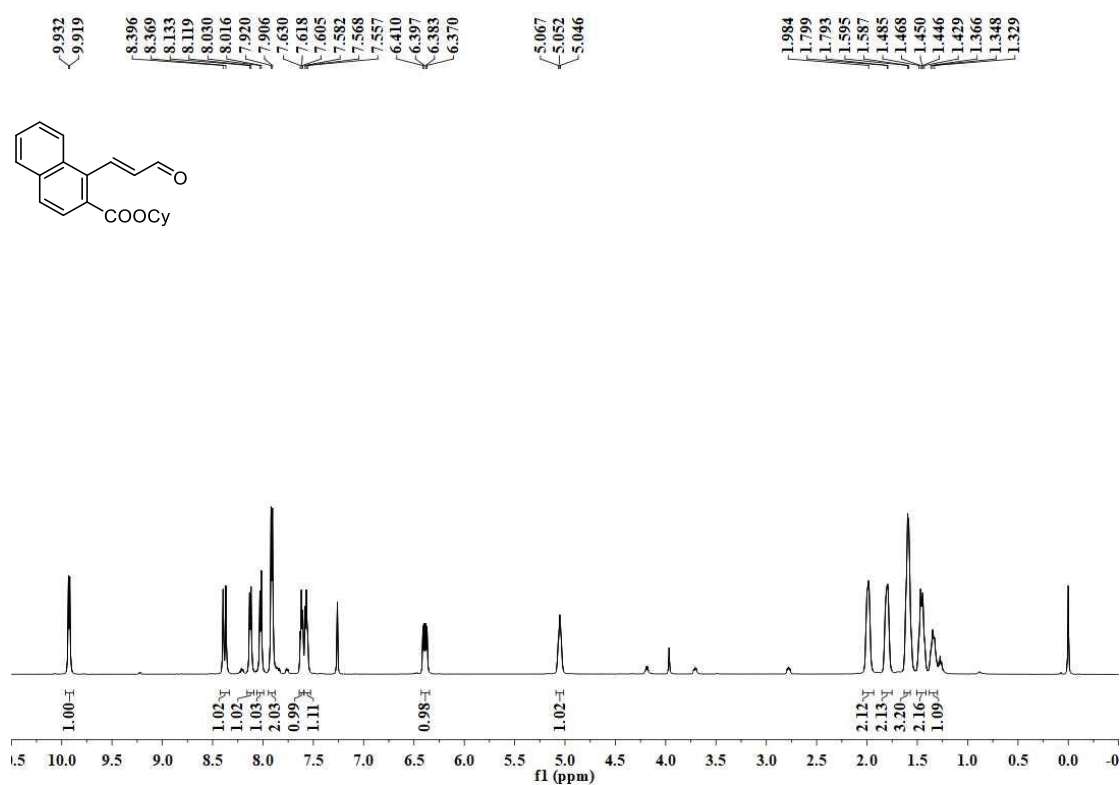

**<sup>13</sup>C NMR Spectrum of S109 (151 MHz, CDCl<sub>3</sub>)**

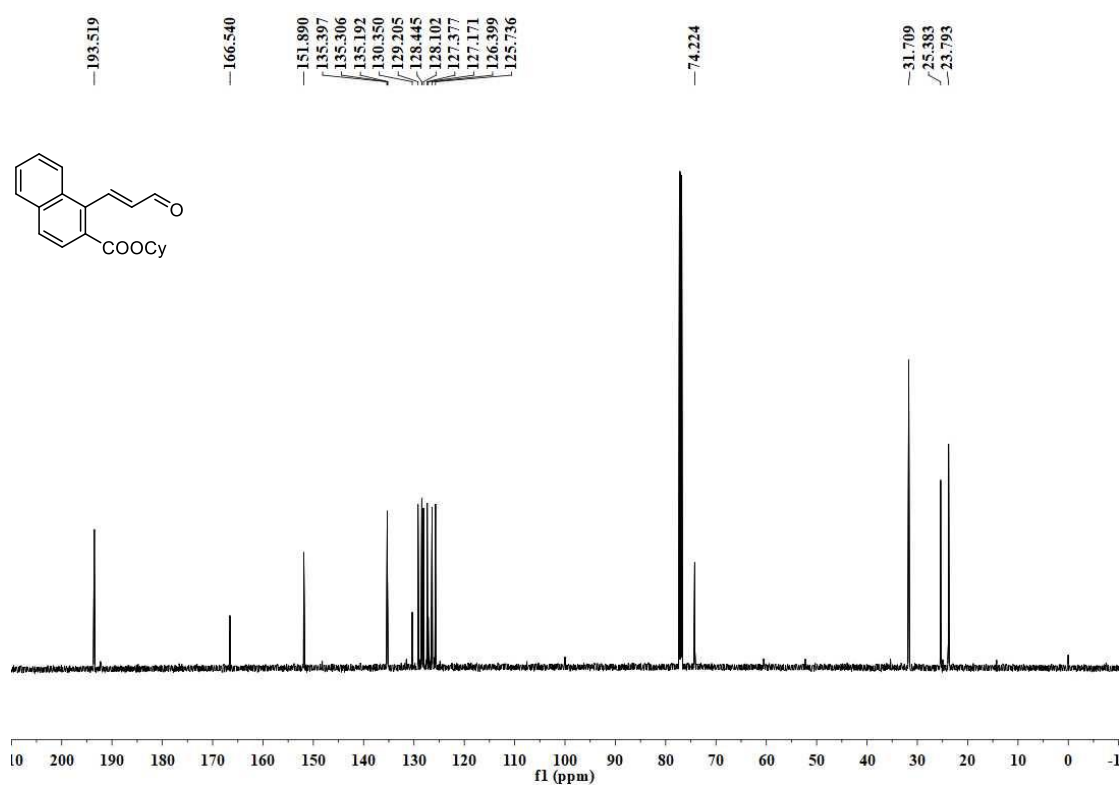

**<sup>1</sup>H NMR Spectrum of S110 (600 MHz, CDCl<sub>3</sub>)**

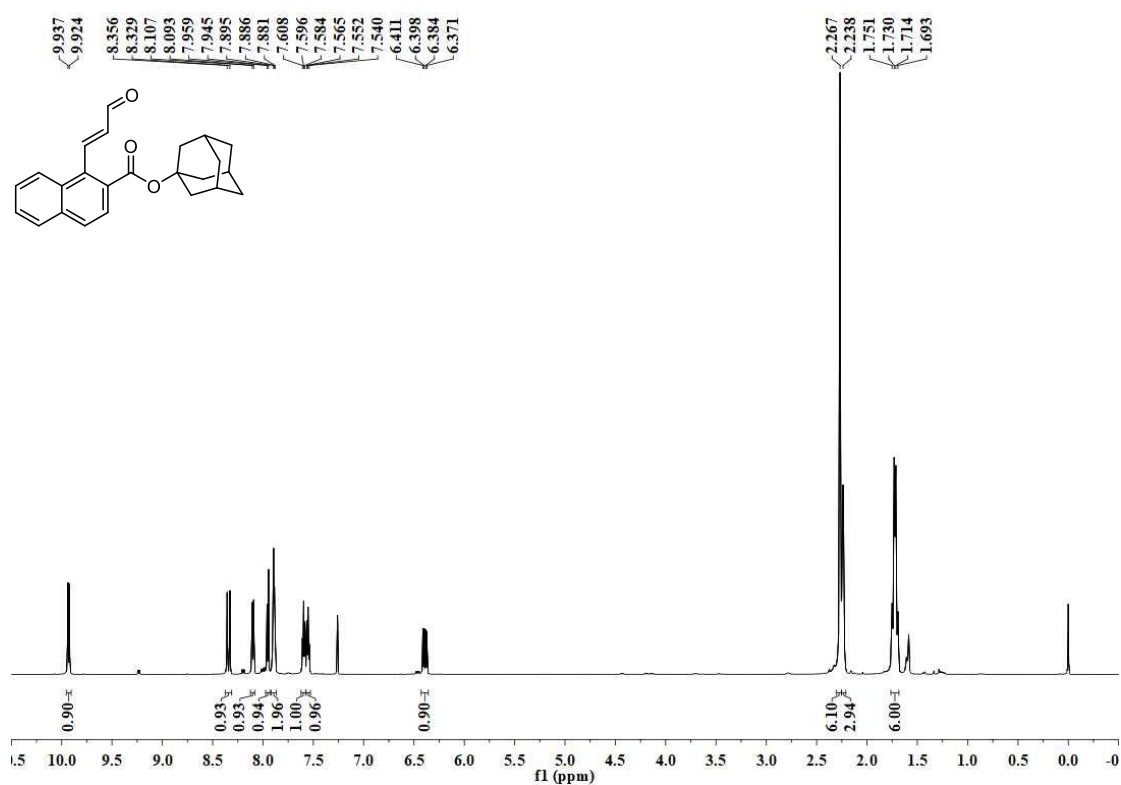

**<sup>13</sup>C NMR Spectrum of S110 (151 MHz, CDCl<sub>3</sub>)**

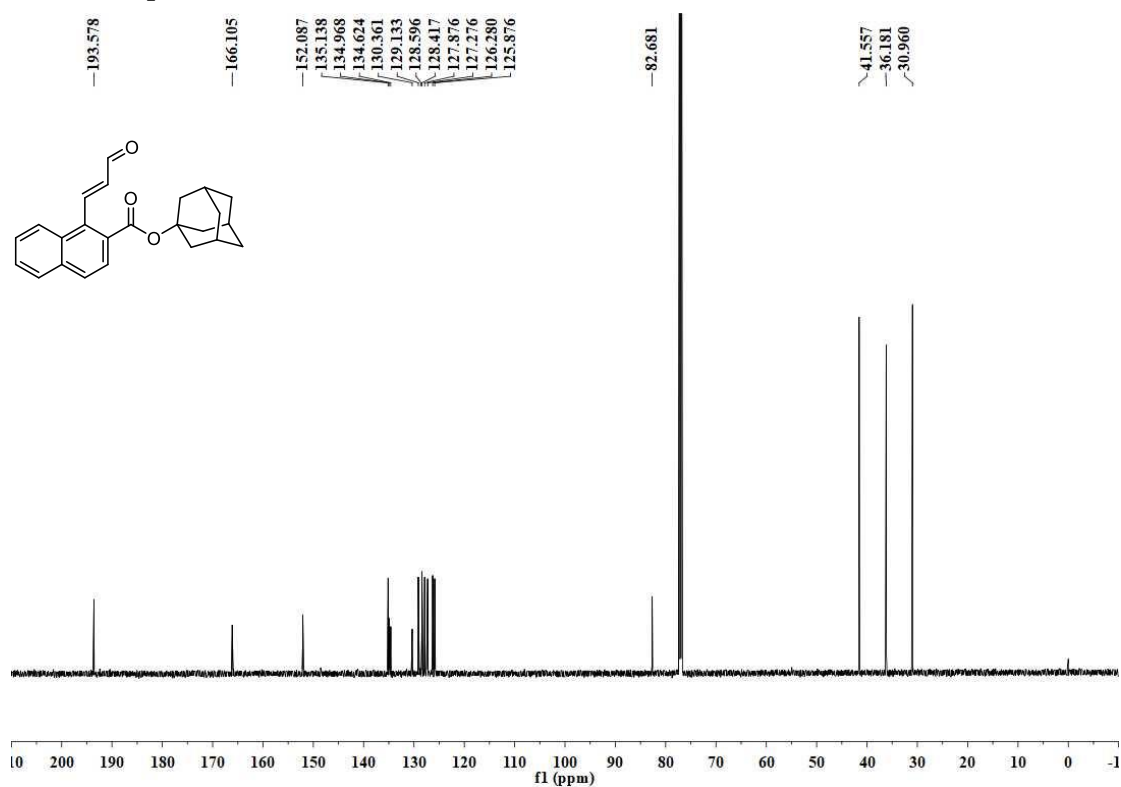



**<sup>1</sup>H NMR Spectrum of S111 (600 MHz, CDCl<sub>3</sub>)**

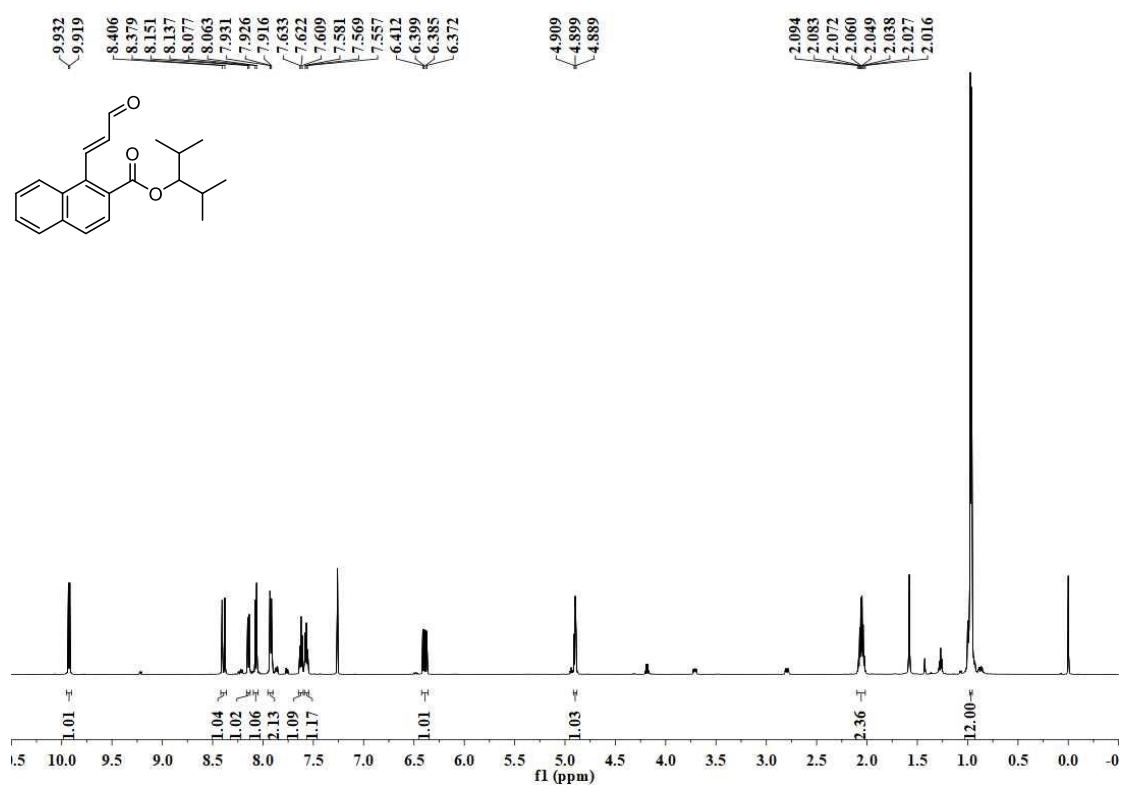

**<sup>13</sup>C NMR Spectrum of S111 (151 MHz, CDCl<sub>3</sub>)**

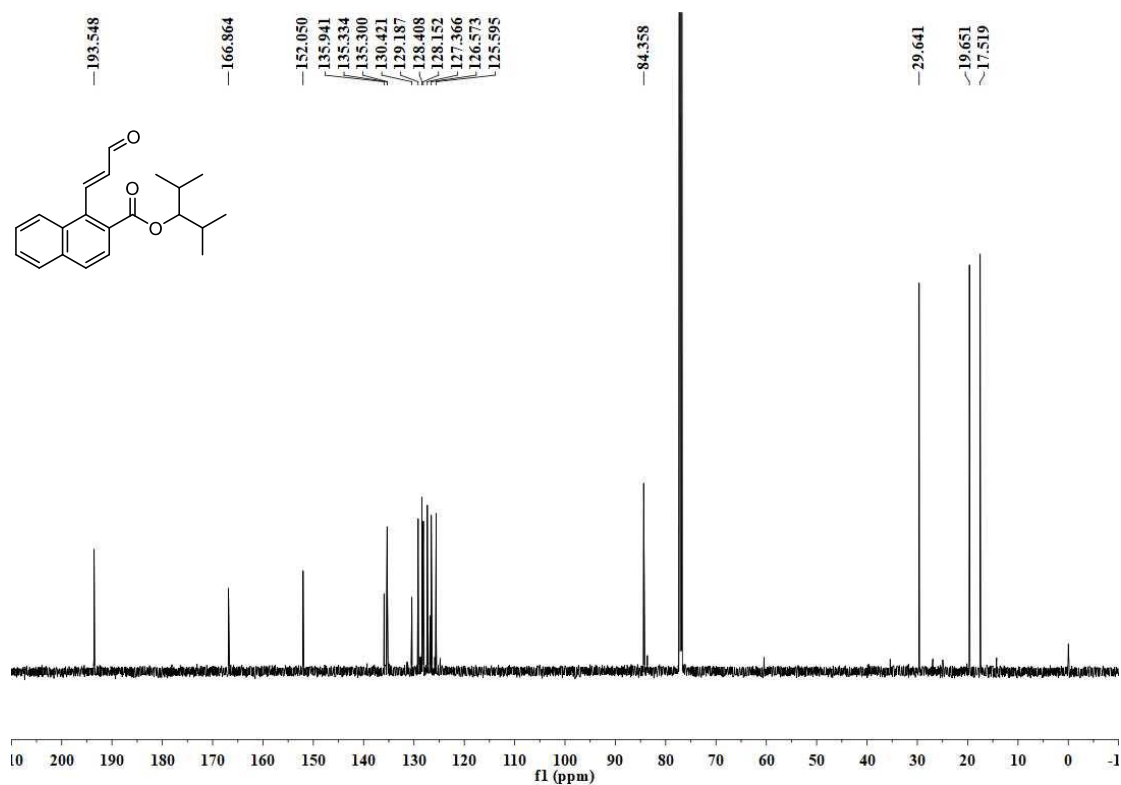

**<sup>1</sup>H NMR Spectrum of S112 (600 MHz, CDCl<sub>3</sub>)**

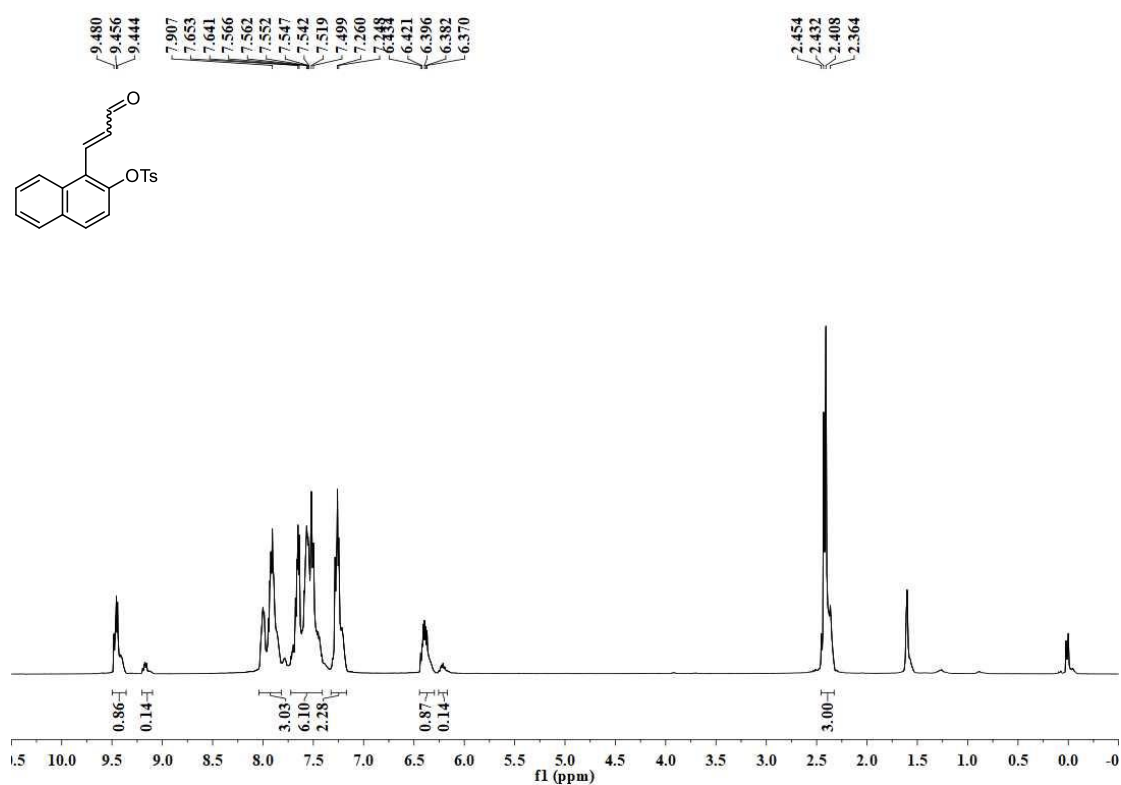

**<sup>13</sup>C NMR Spectrum of S112 (151 MHz, CDCl<sub>3</sub>)**

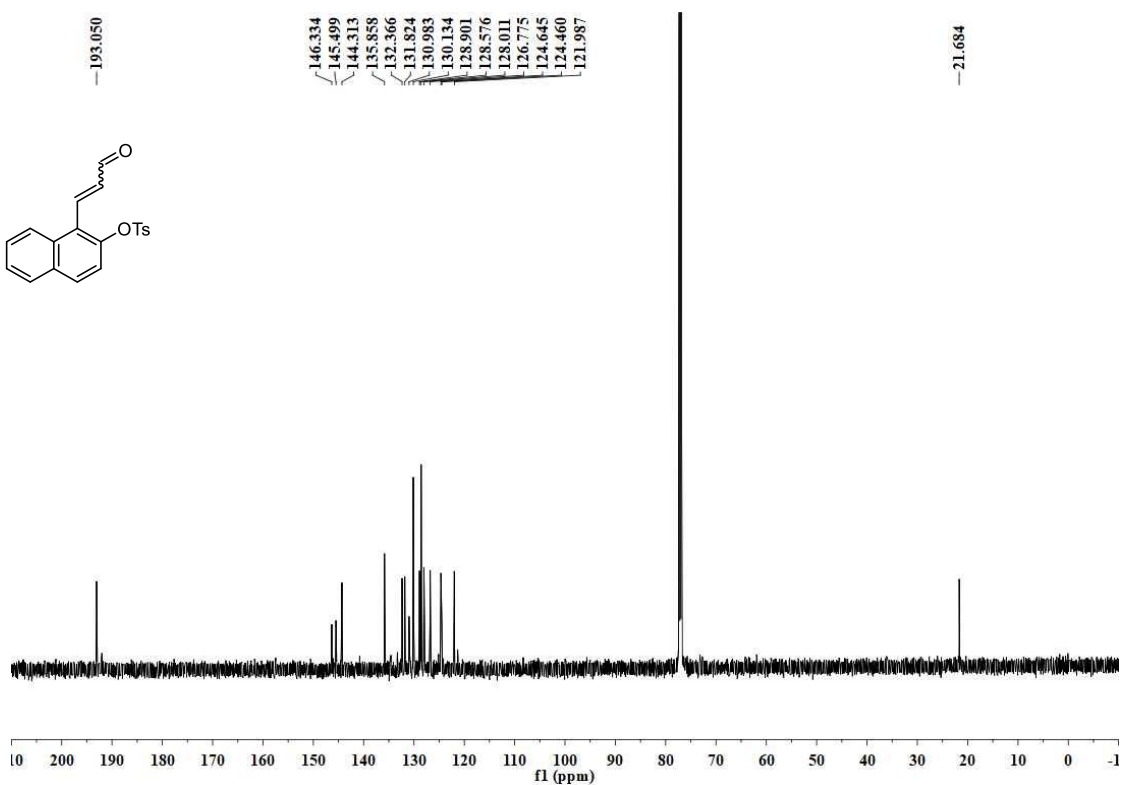

**<sup>1</sup>H NMR Spectrum of S113 (600 MHz, CDCl<sub>3</sub>)**

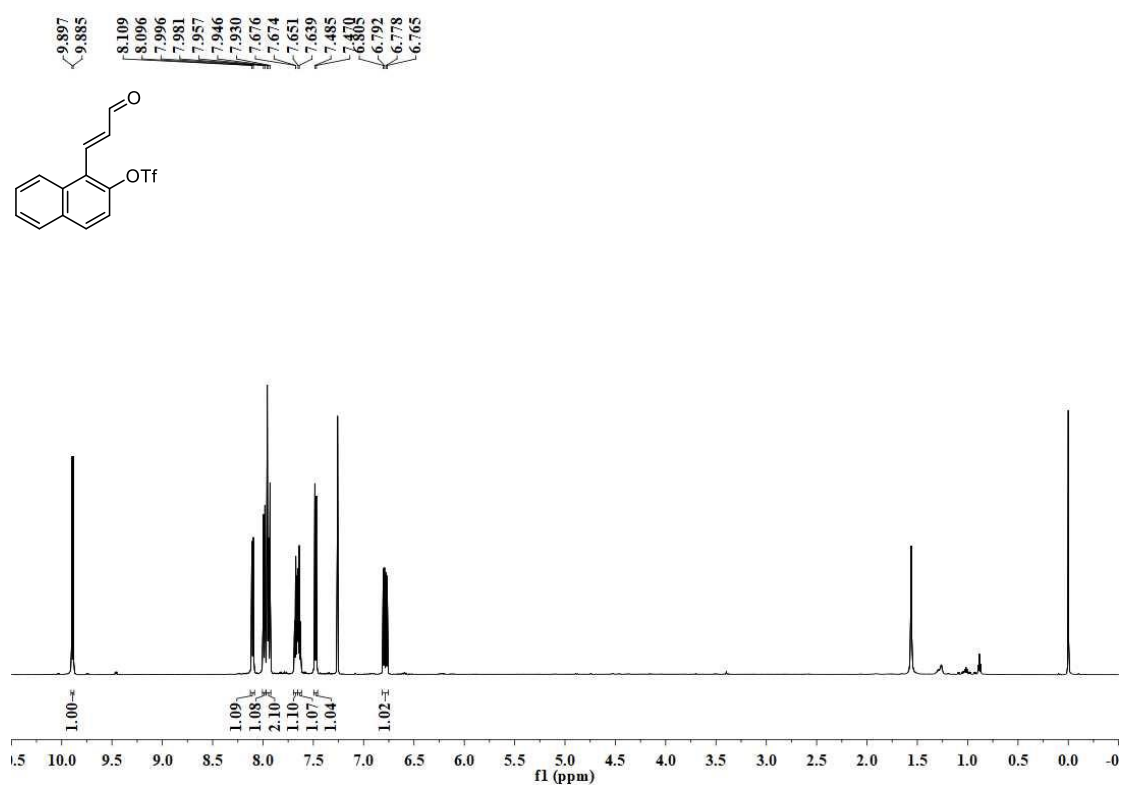

**<sup>13</sup>C NMR Spectrum of S112 (151 MHz, CDCl<sub>3</sub>)**

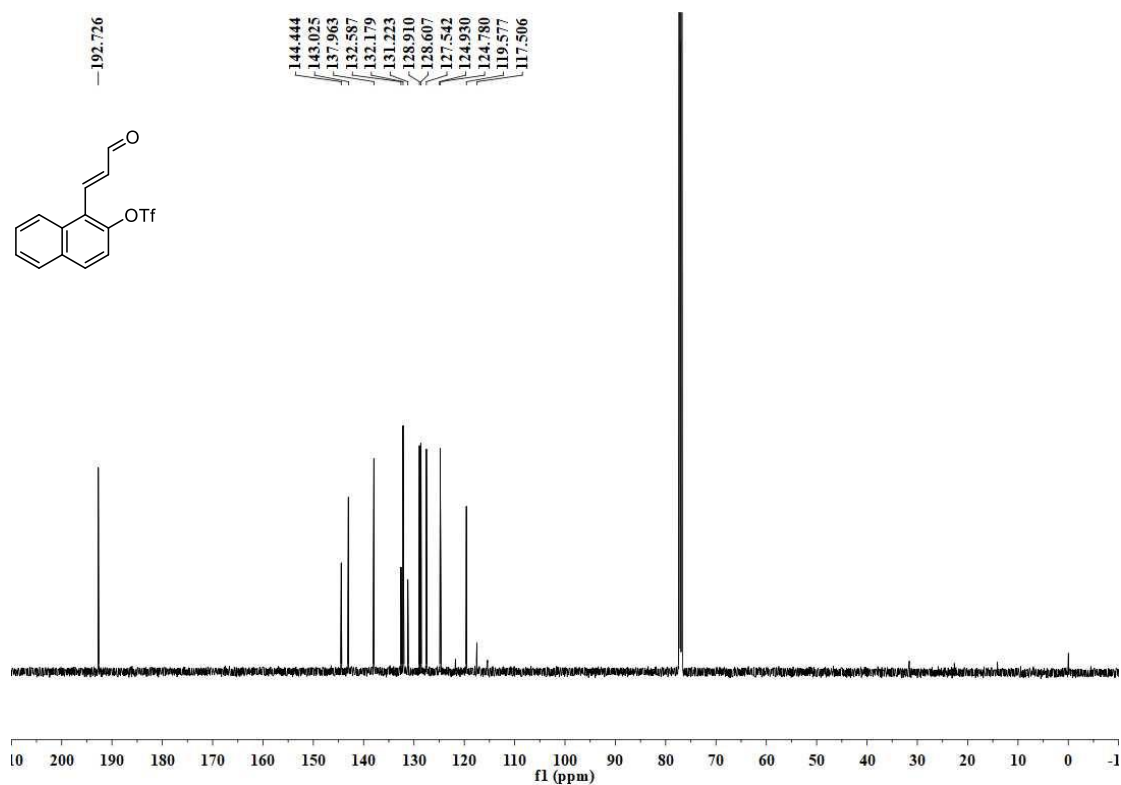

**$^{19}\text{F}$  NMR Spectrum of S113 (565 MHz,  $\text{CDCl}_3$ )**

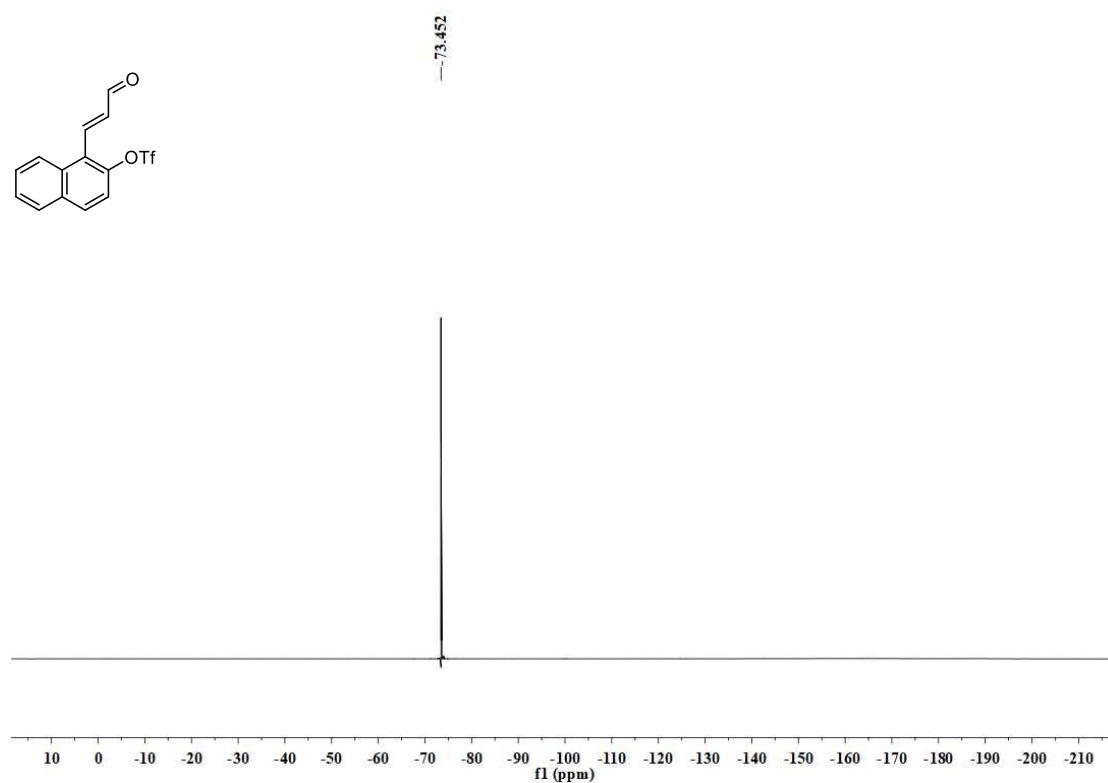

**$^1\text{H}$  NMR Spectrum of S114 (600 MHz,  $\text{CDCl}_3$ )**

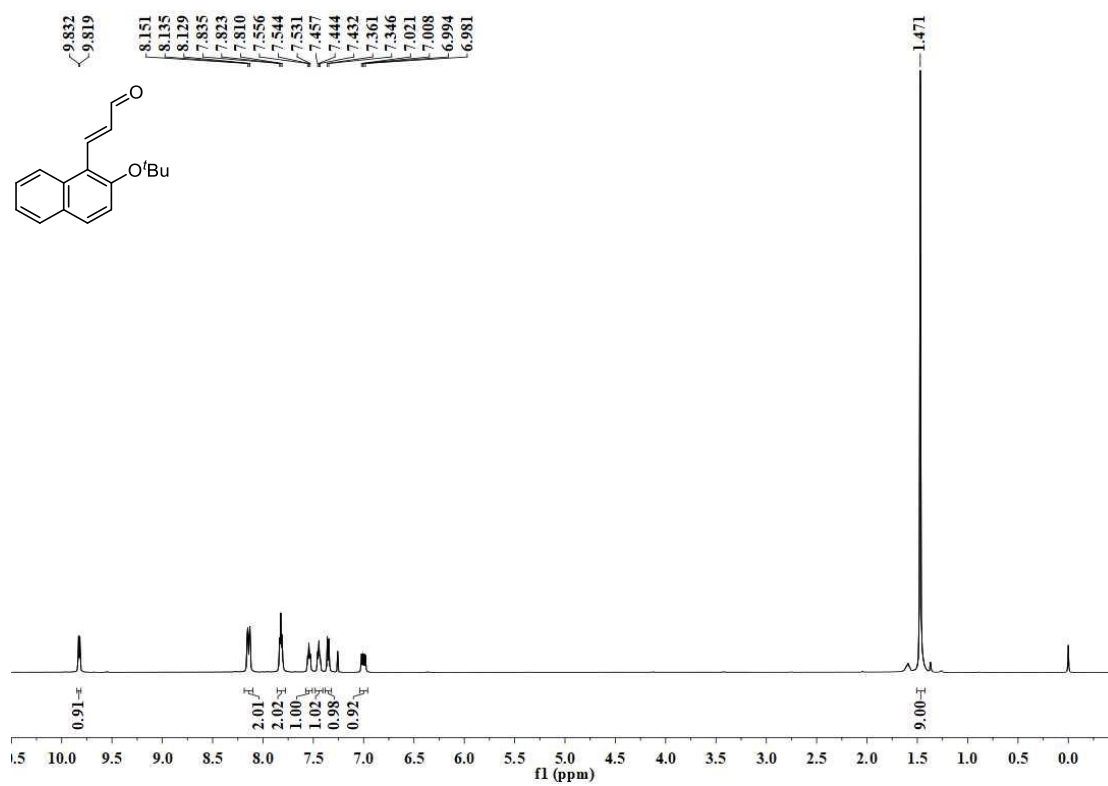

**$^{13}\text{C}$  NMR Spectrum of S114 (151 MHz,  $\text{CDCl}_3$ )**

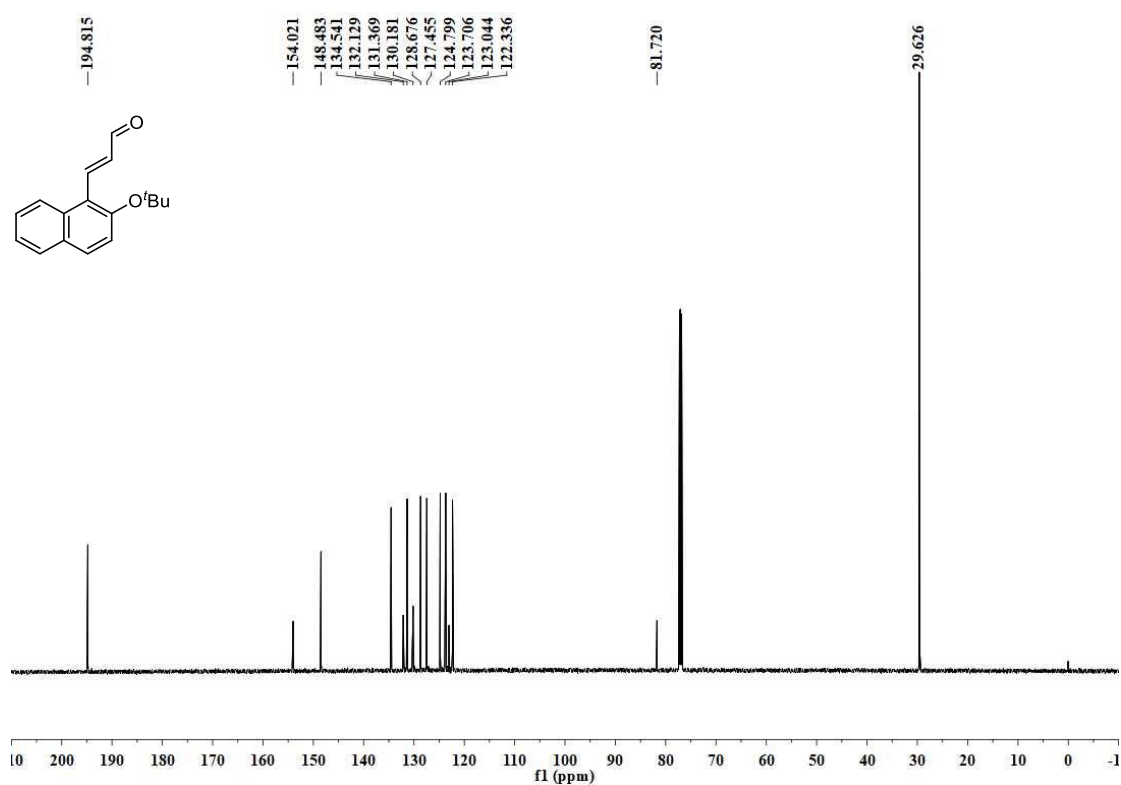

**$^1\text{H}$  NMR Spectrum of S115 (600 MHz,  $\text{CDCl}_3$ )**

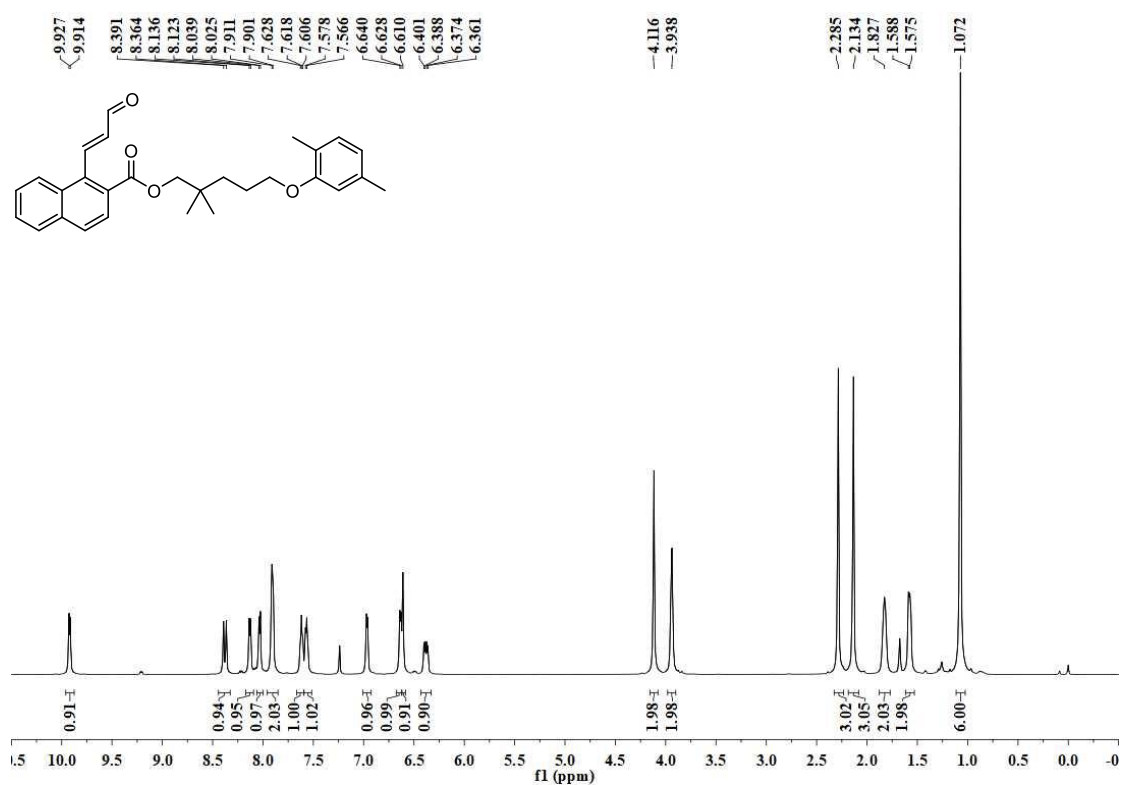

**$^{13}\text{C}$  NMR Spectrum of S115 (151 MHz,  $\text{CDCl}_3$ )**

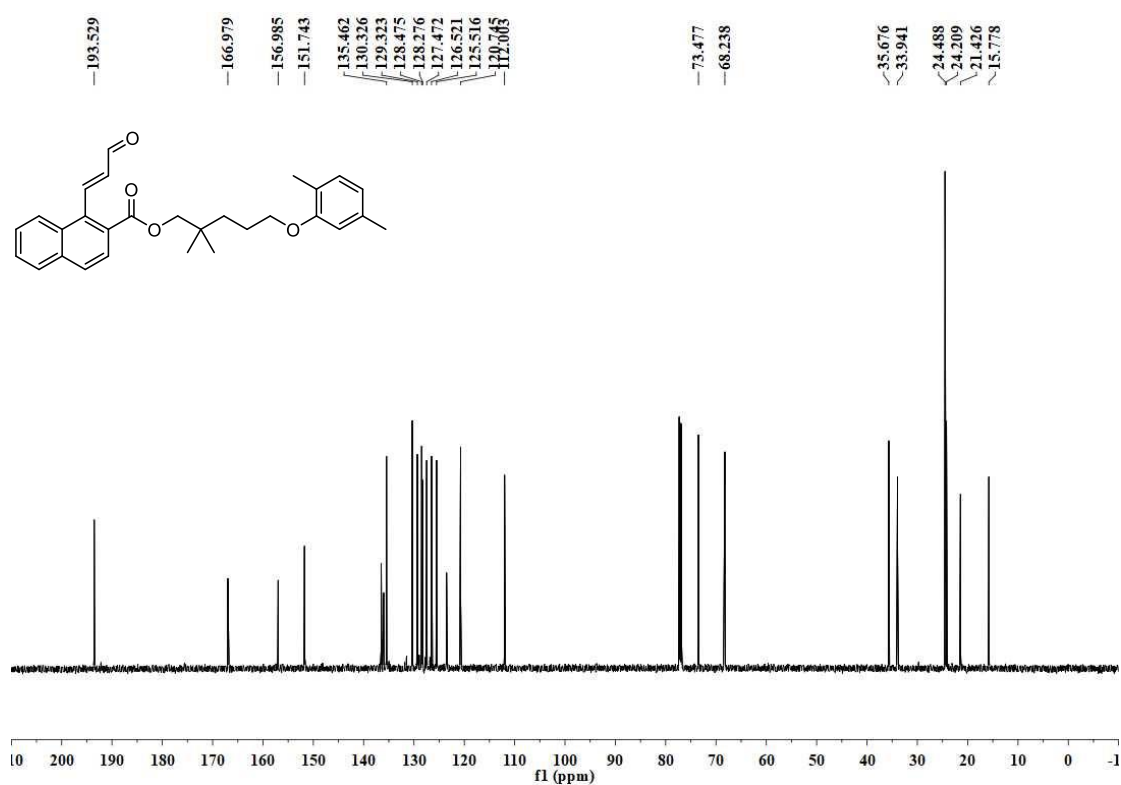

**$^1\text{H}$  NMR Spectrum of S116 (600 MHz,  $\text{CDCl}_3$ )**

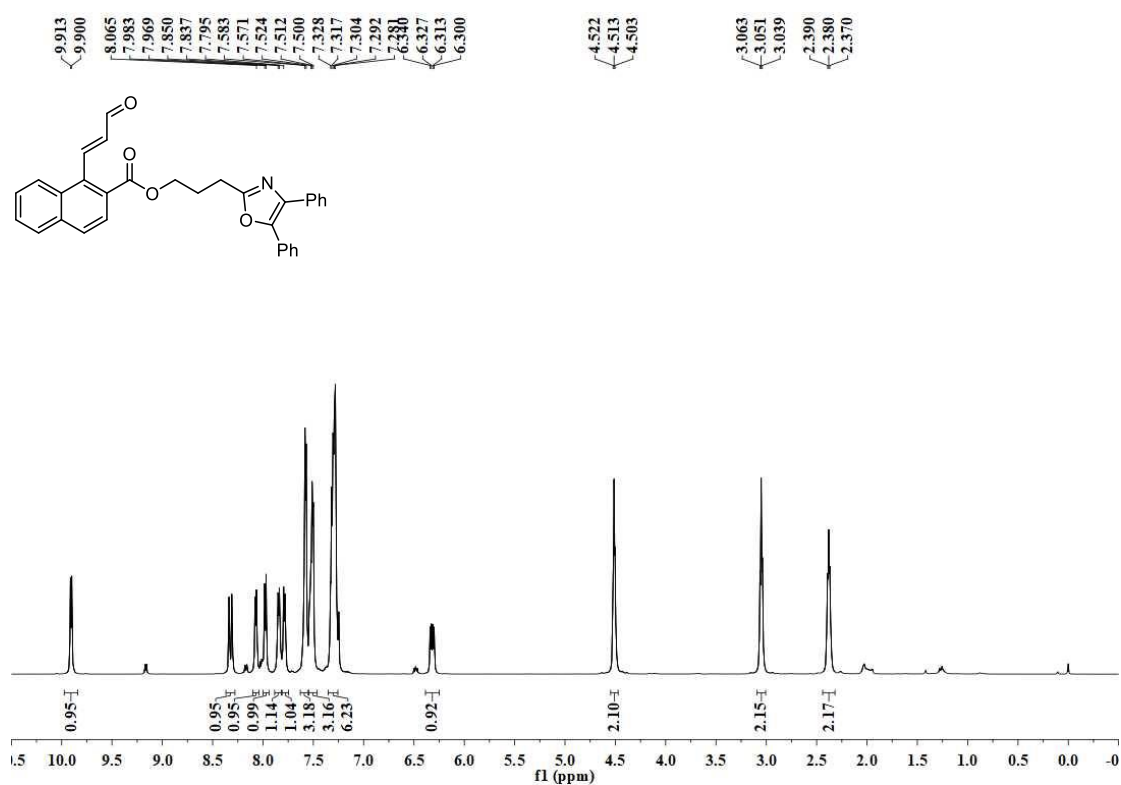

**$^{13}\text{C}$  NMR Spectrum of S116 (151 MHz,  $\text{CDCl}_3$ )**

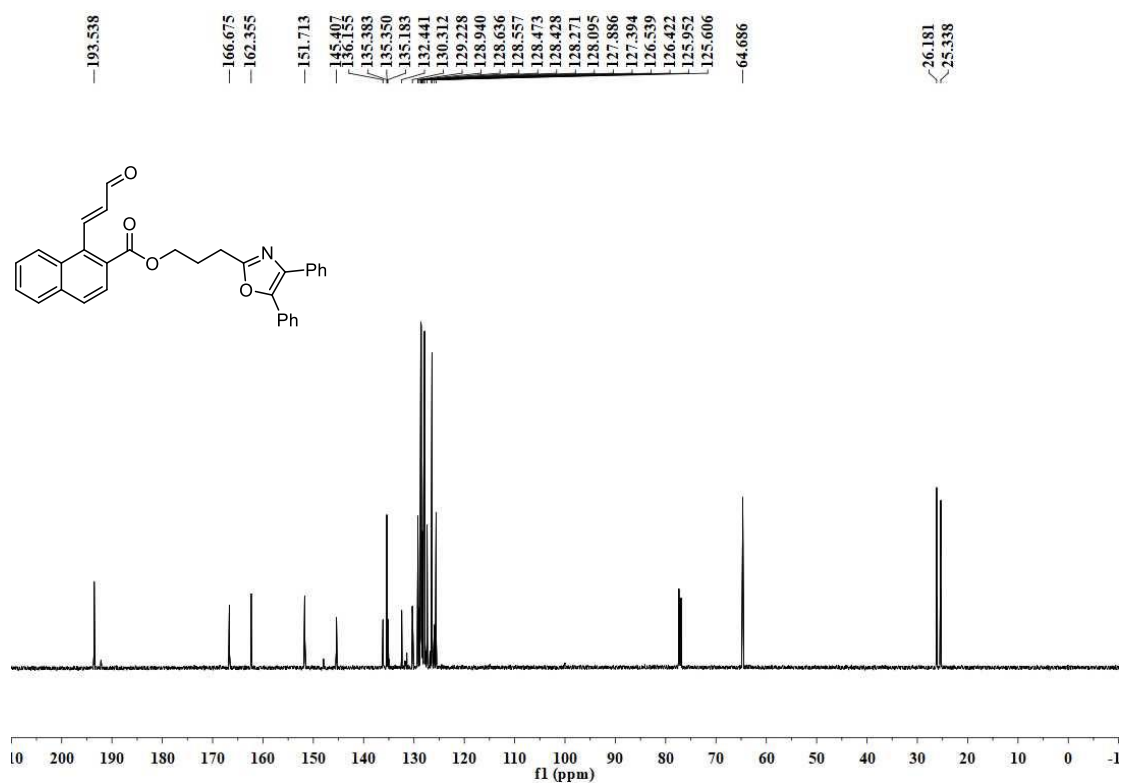

**$^1\text{H}$  NMR Spectrum of 3 (600 MHz,  $\text{CDCl}_3$ )**

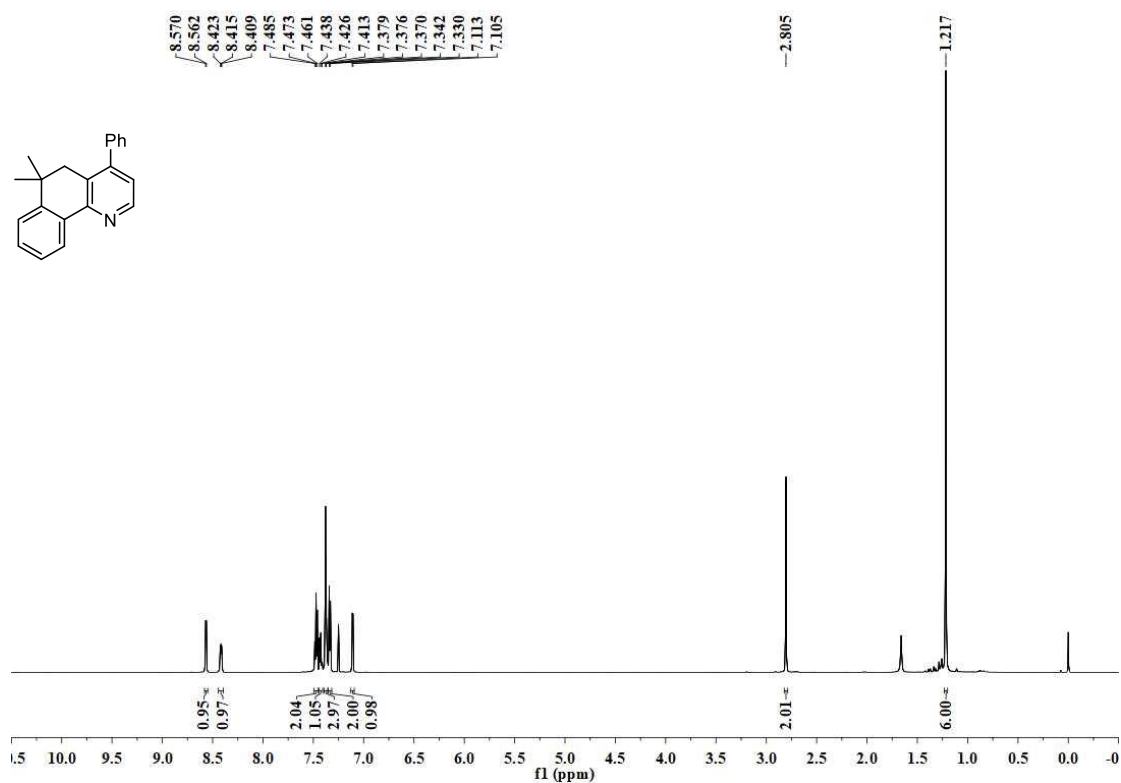

**$^{13}\text{C}$  NMR Spectrum of 3 (151 MHz,  $\text{CDCl}_3$ )**

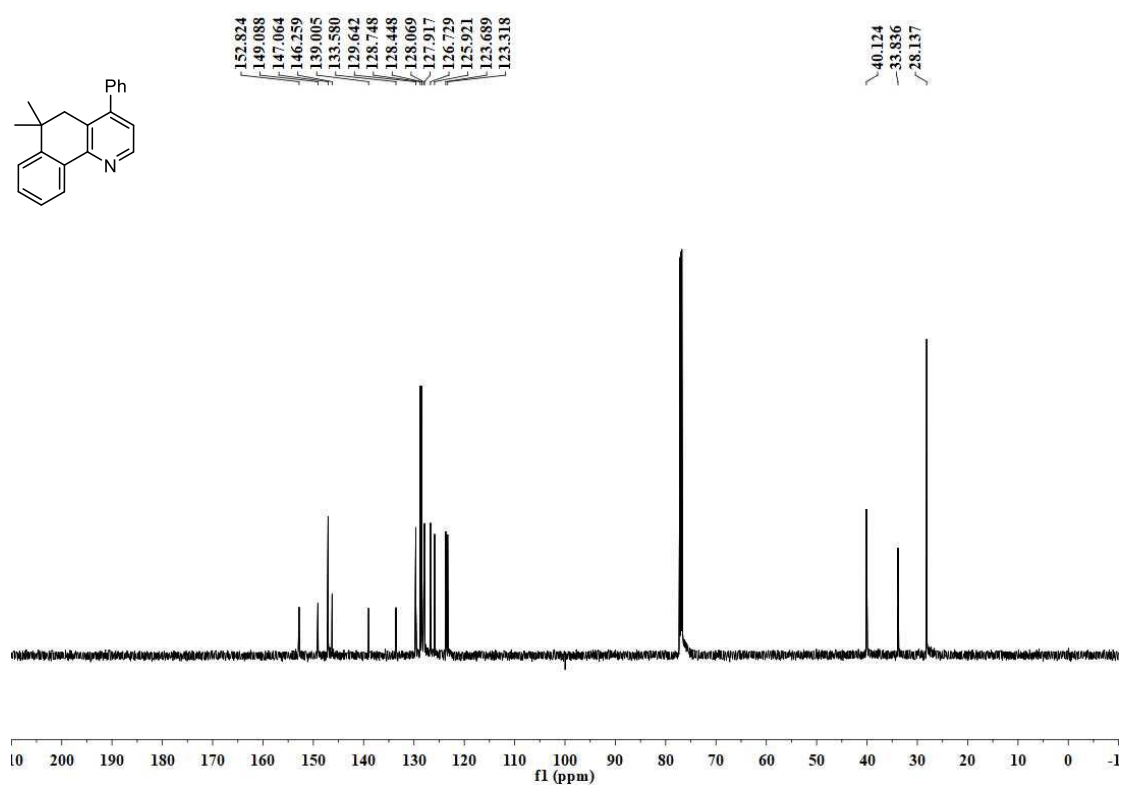

**$^1\text{H}$  NMR Spectrum of 3' (600 MHz,  $\text{CDCl}_3$ )**

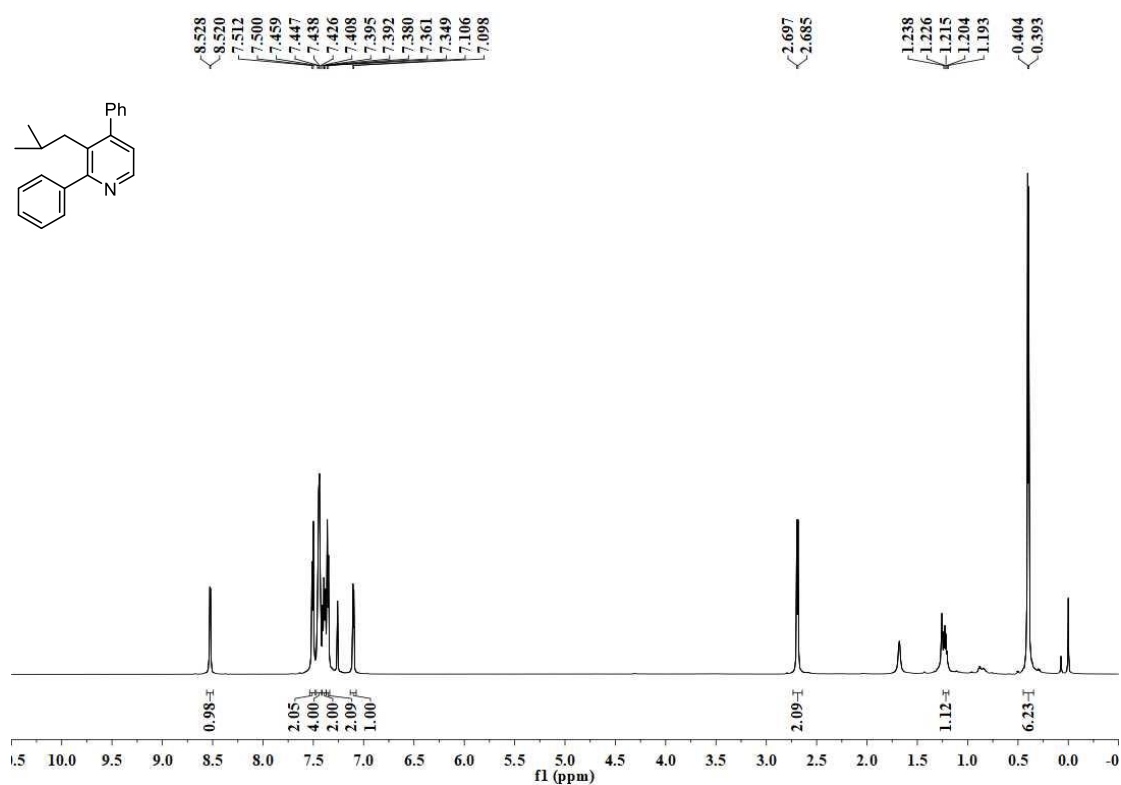



**$^{13}\text{C}$  NMR Spectrum of 3' (151 MHz,  $\text{CDCl}_3$ )**

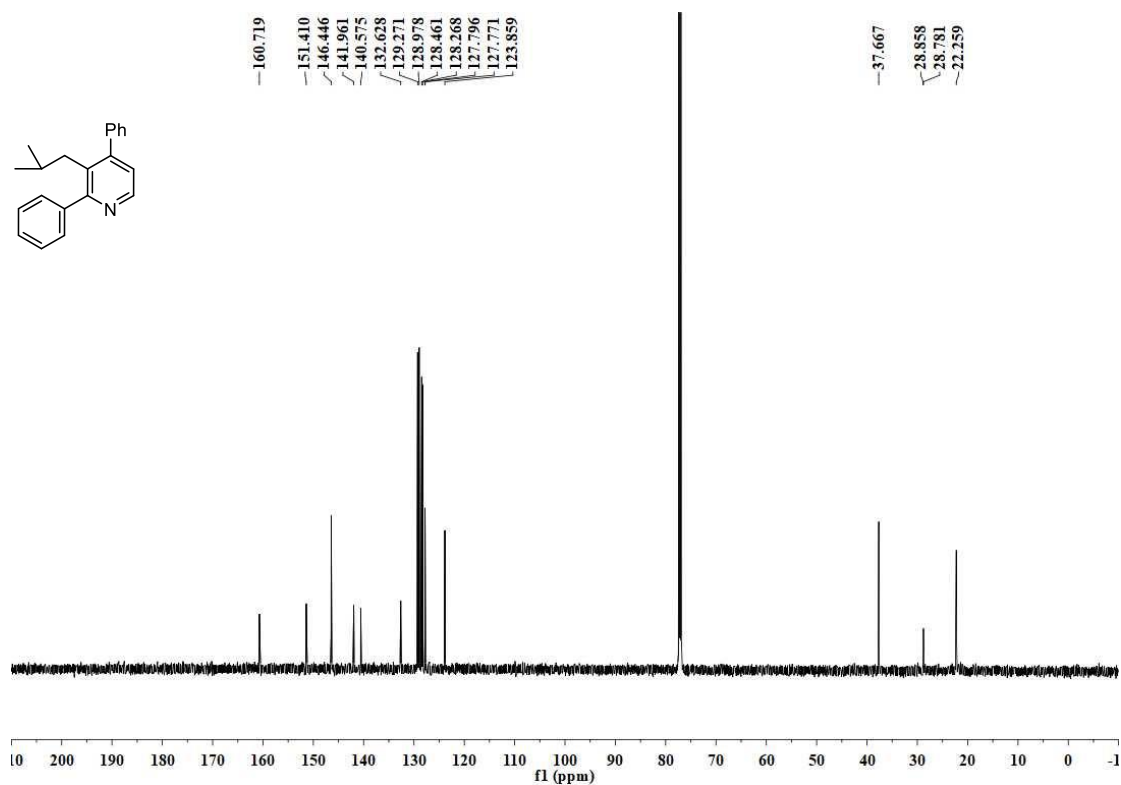

**$^1\text{H}$  NMR Spectrum of 4 (600 MHz,  $\text{CDCl}_3$ )**

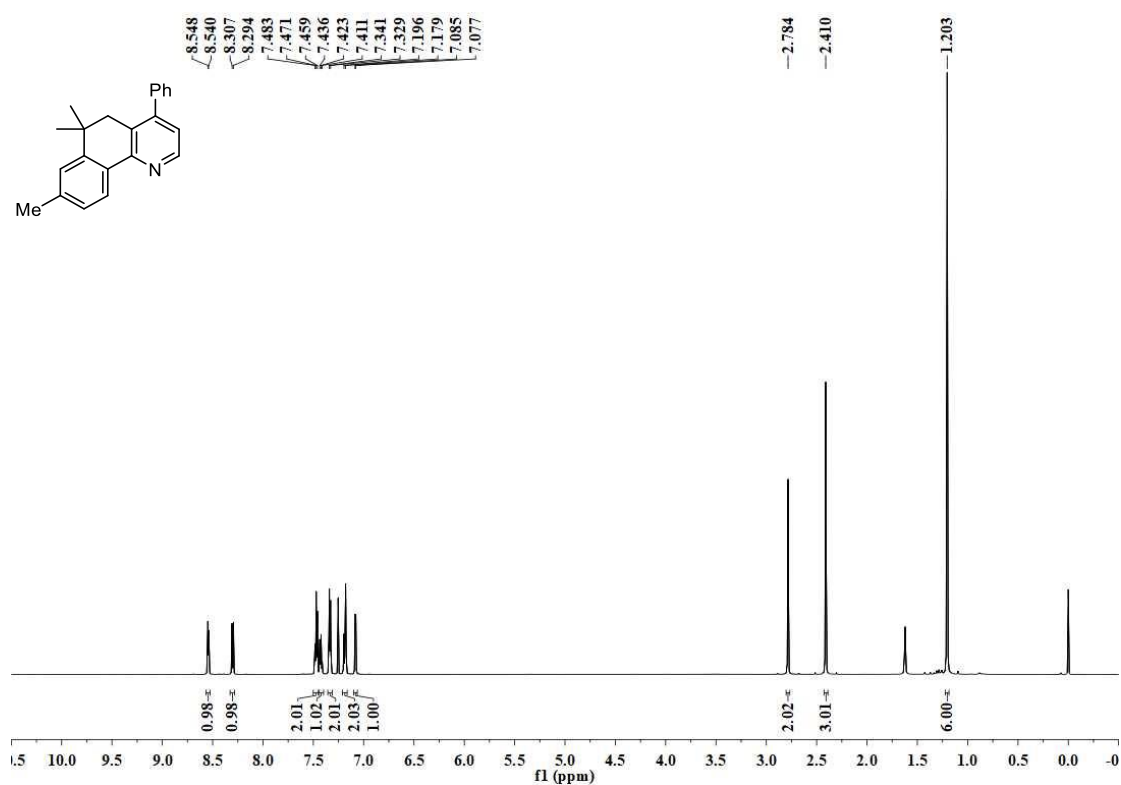

**<sup>13</sup>C NMR Spectrum of 4 (151 MHz, CDCl<sub>3</sub>)**

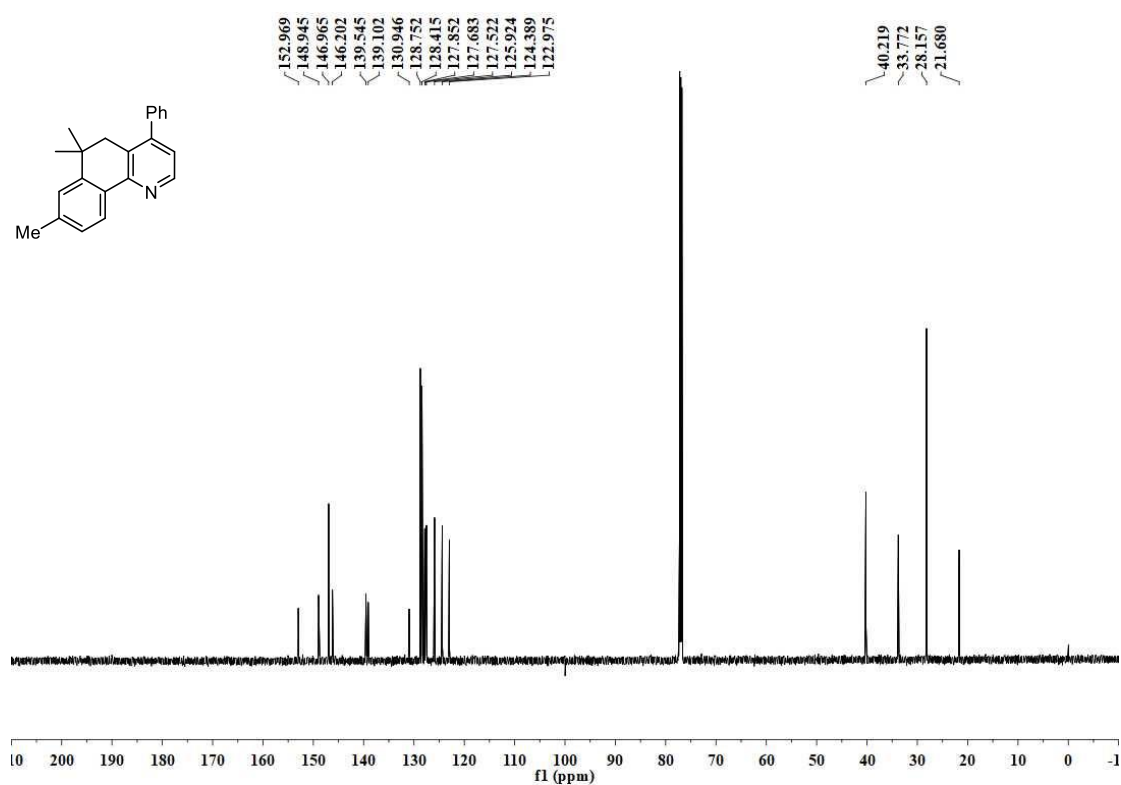

**<sup>1</sup>H NMR Spectrum of 5 (600 MHz, CDCl<sub>3</sub>)**

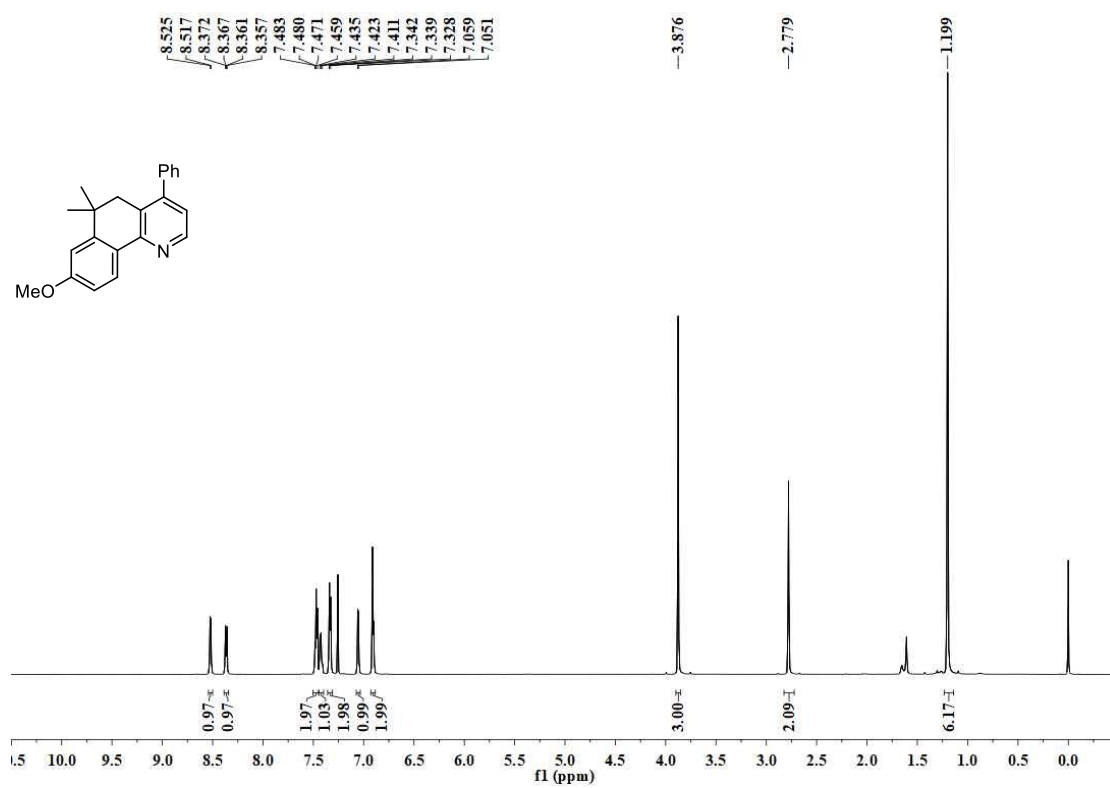

**$^{13}\text{C}$  NMR Spectrum of 5 (151 MHz,  $\text{CDCl}_3$ )**

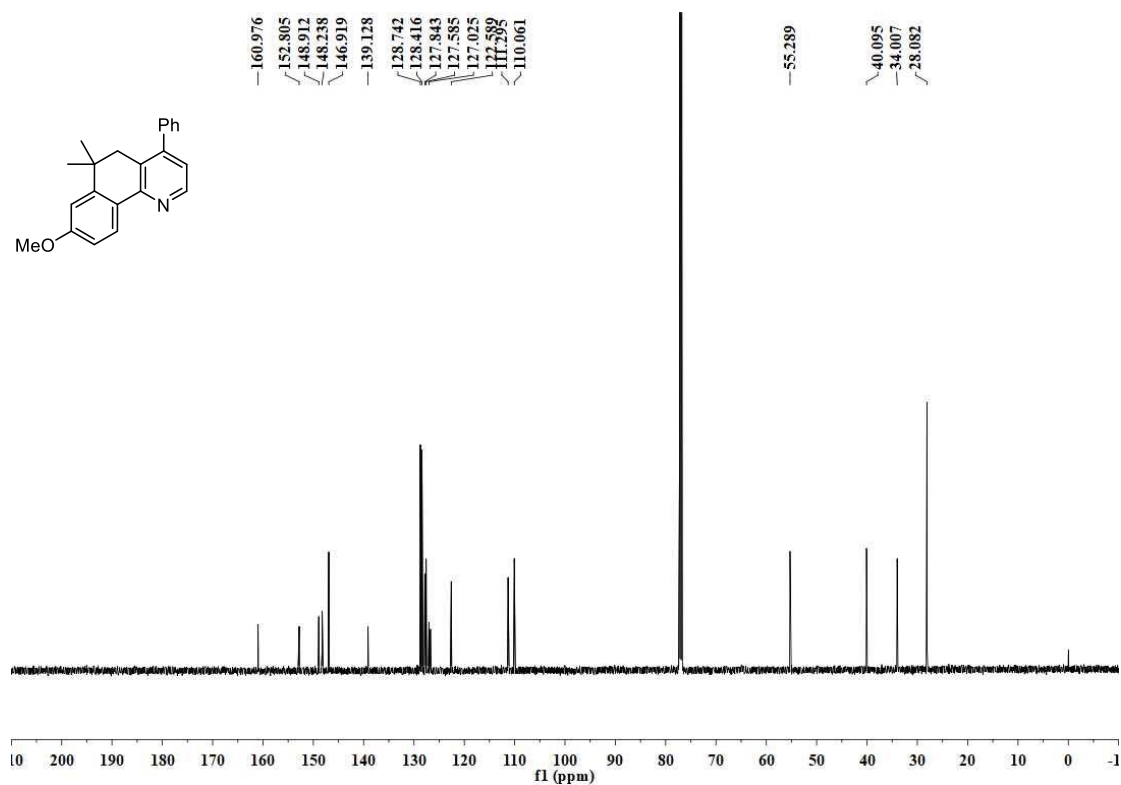

**$^1\text{H}$  NMR Spectrum of 6 (600 MHz,  $\text{CDCl}_3$ )**

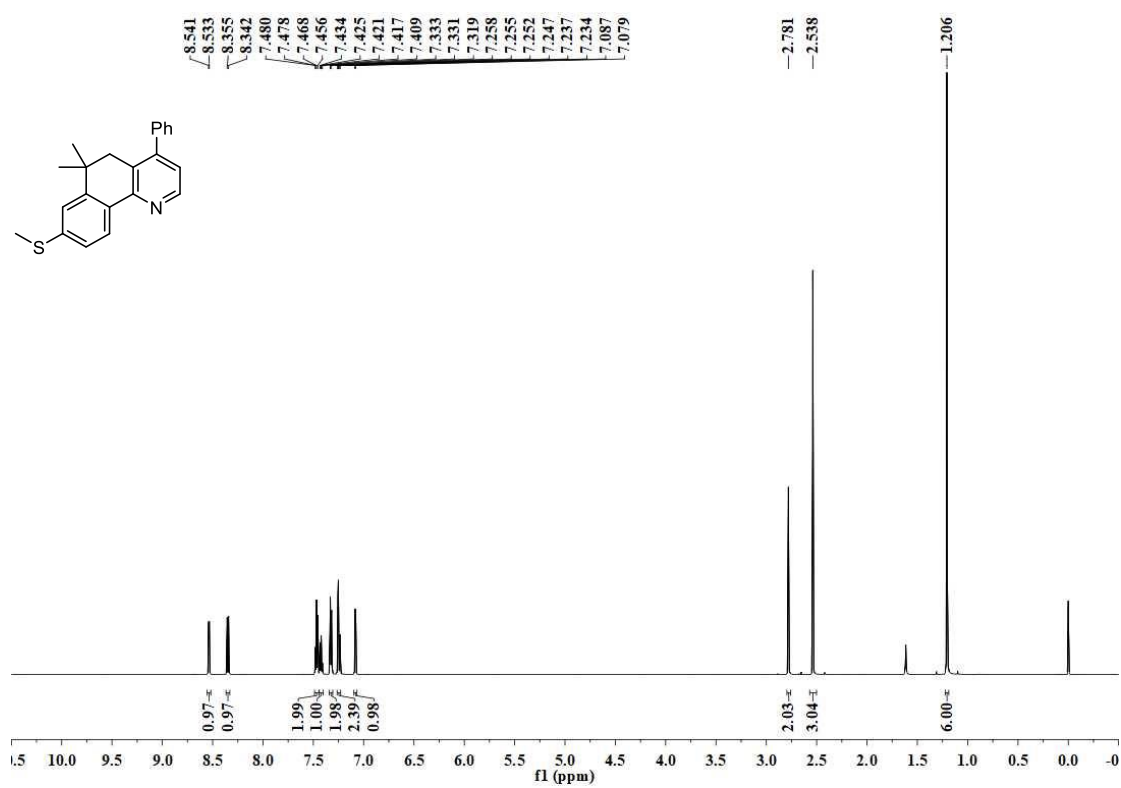

**$^{13}\text{C}$  NMR Spectrum of 6 (151 MHz,  $\text{CDCl}_3$ )**

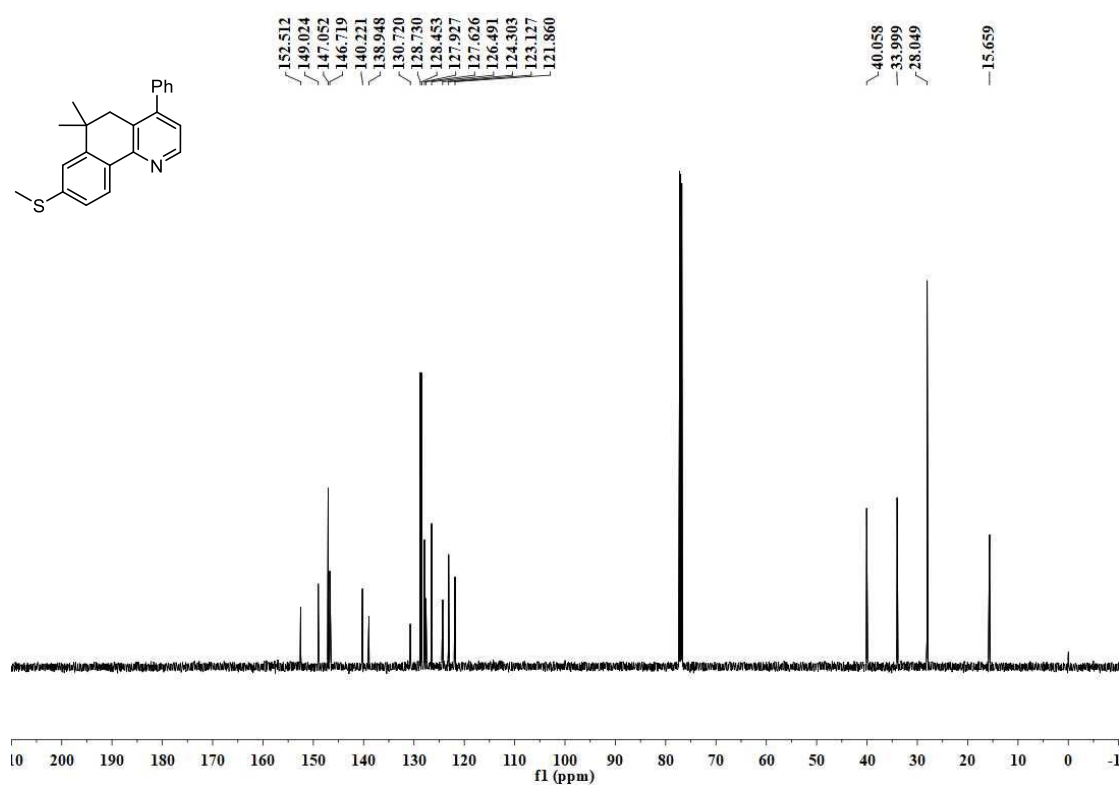

**$^1\text{H}$  NMR Spectrum of 7 (600 MHz,  $\text{CDCl}_3$ )**

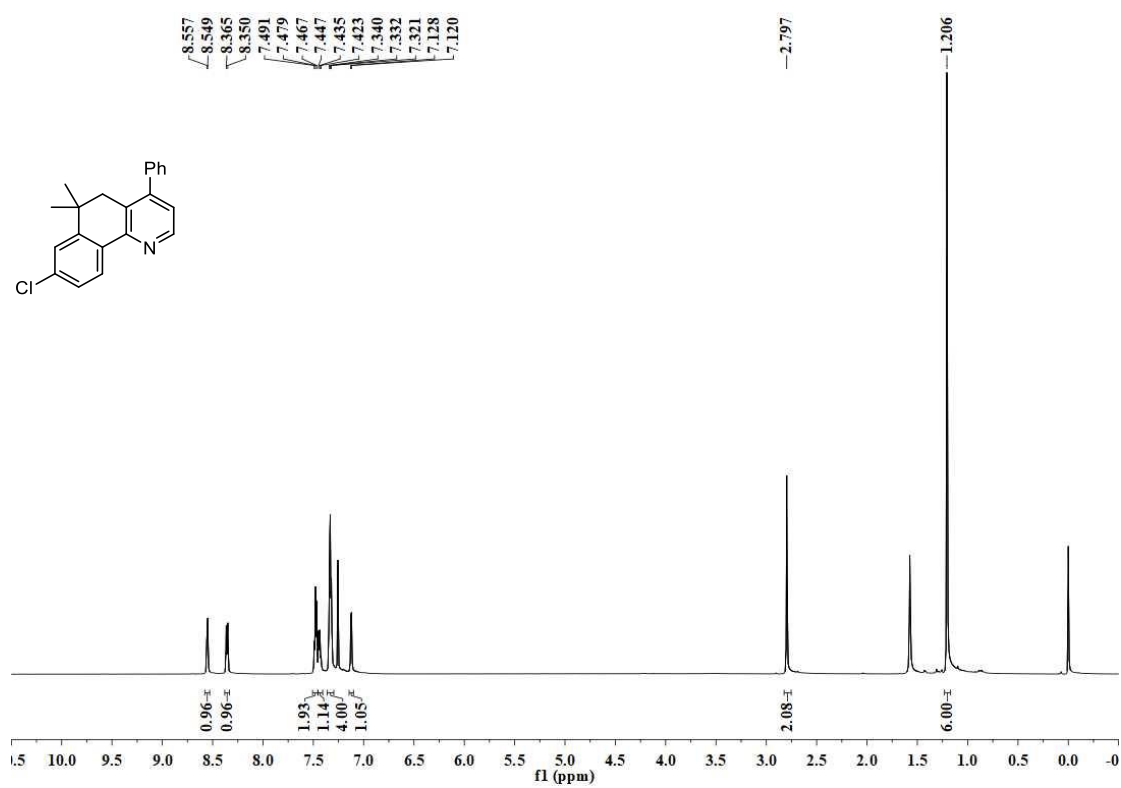

**$^{13}\text{C}$  NMR Spectrum of 7 (151 MHz,  $\text{CDCl}_3$ )**

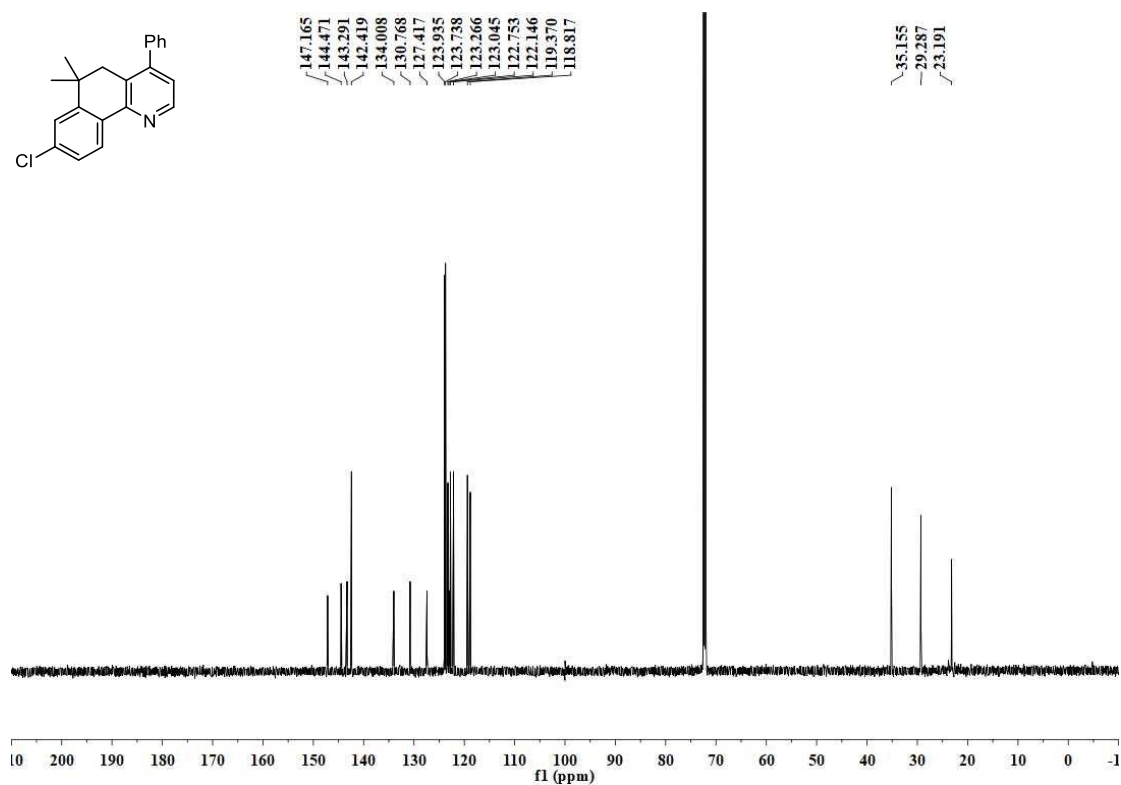

**$^1\text{H}$  NMR Spectrum of 8 (600 MHz,  $\text{CDCl}_3$ )**

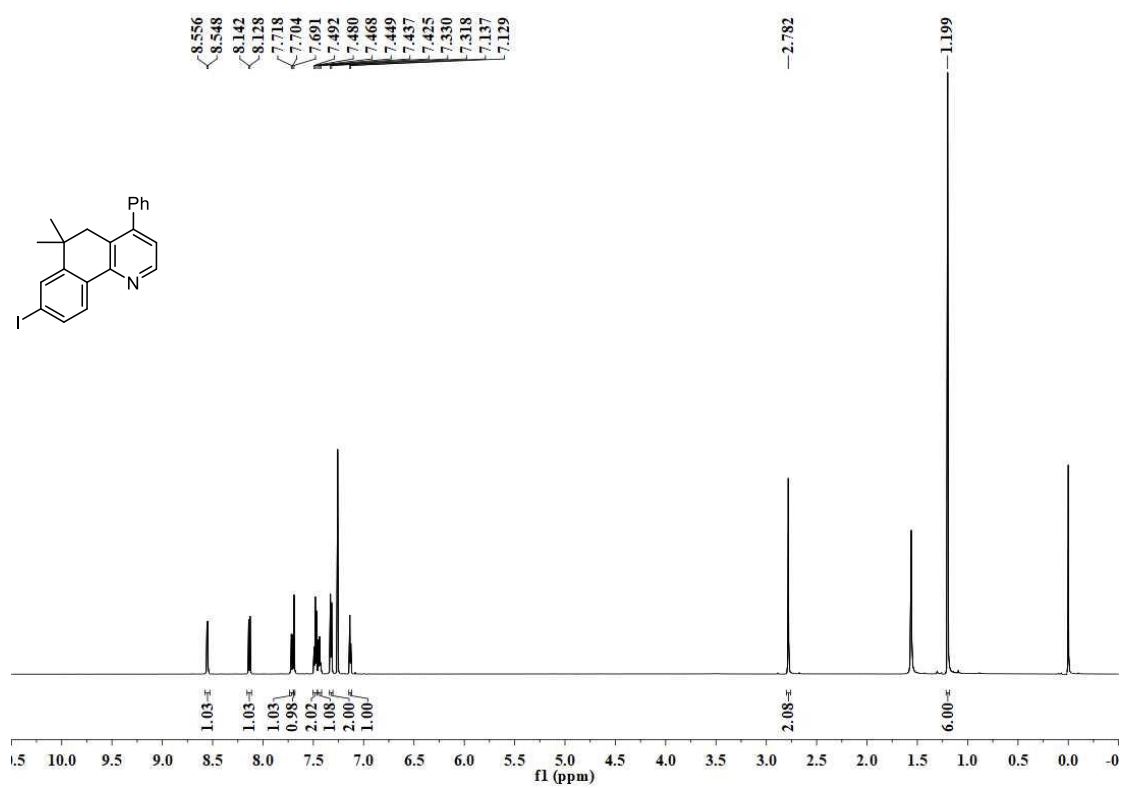

**<sup>13</sup>C NMR Spectrum of 8 (151 MHz, CDCl<sub>3</sub>)**

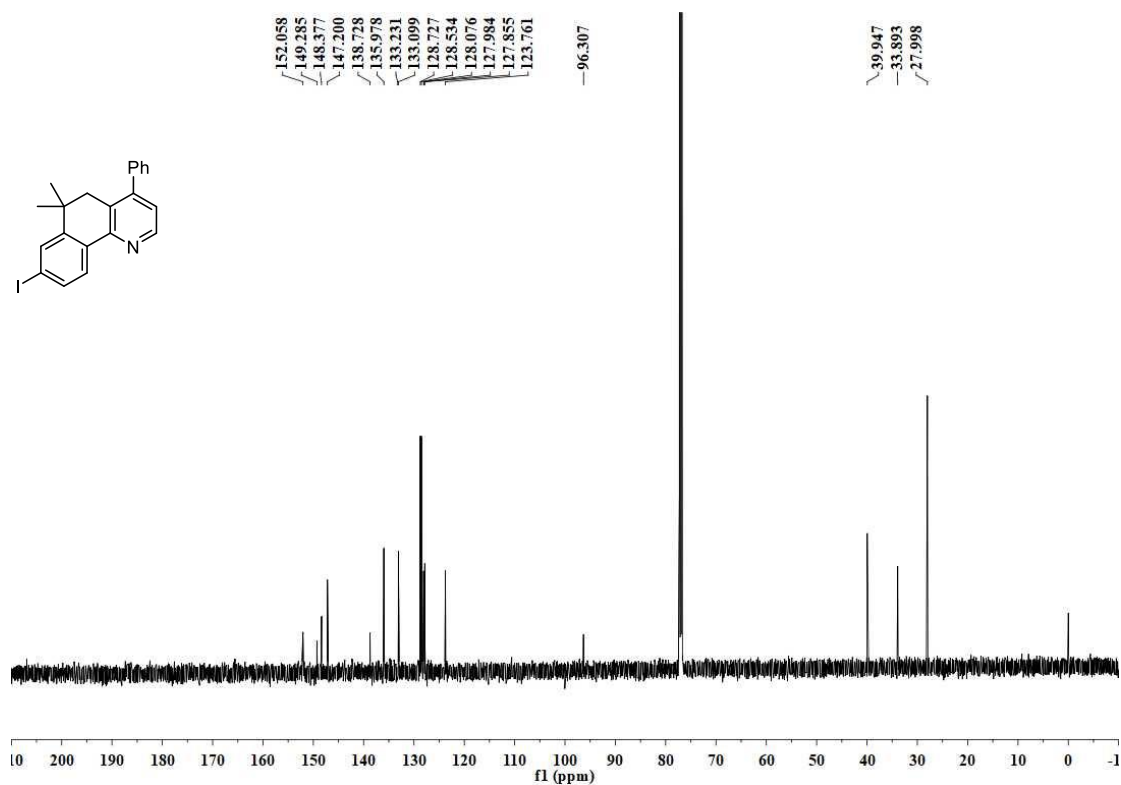

**<sup>1</sup>H NMR Spectrum of 9 (600 MHz, CDCl<sub>3</sub>)**

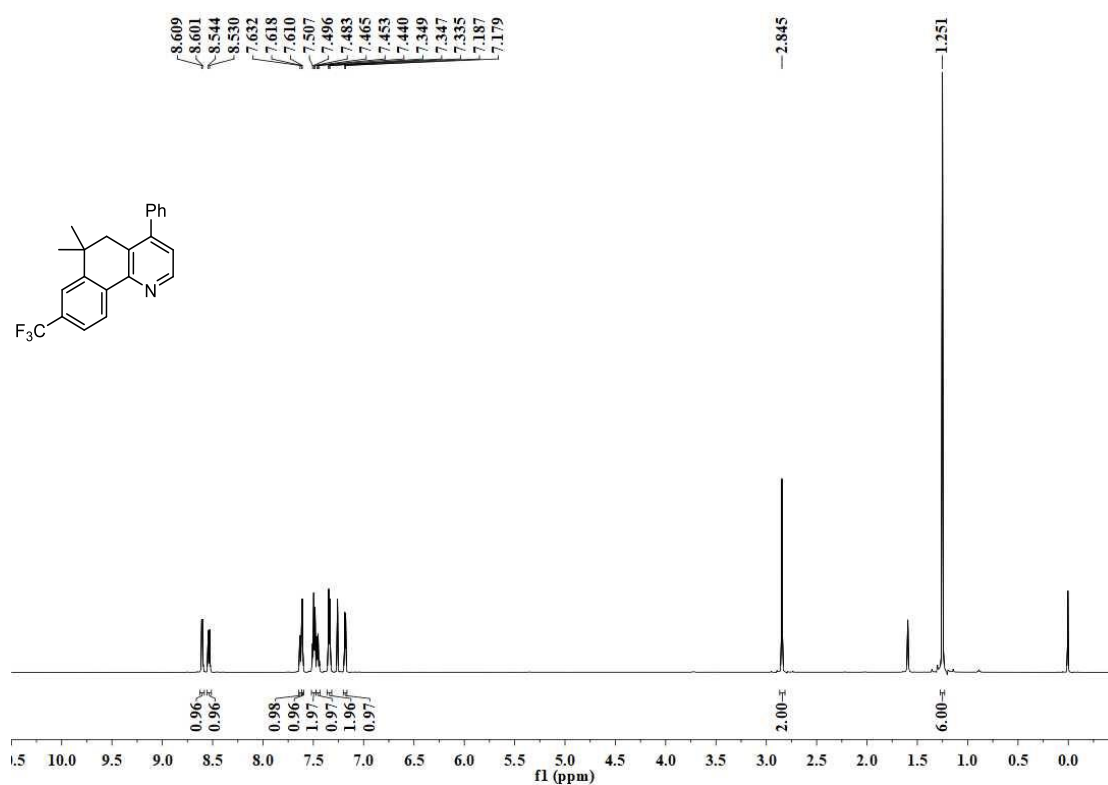

**$^{13}\text{C}$  NMR Spectrum of 9 (151 MHz,  $\text{CDCl}_3$ )**

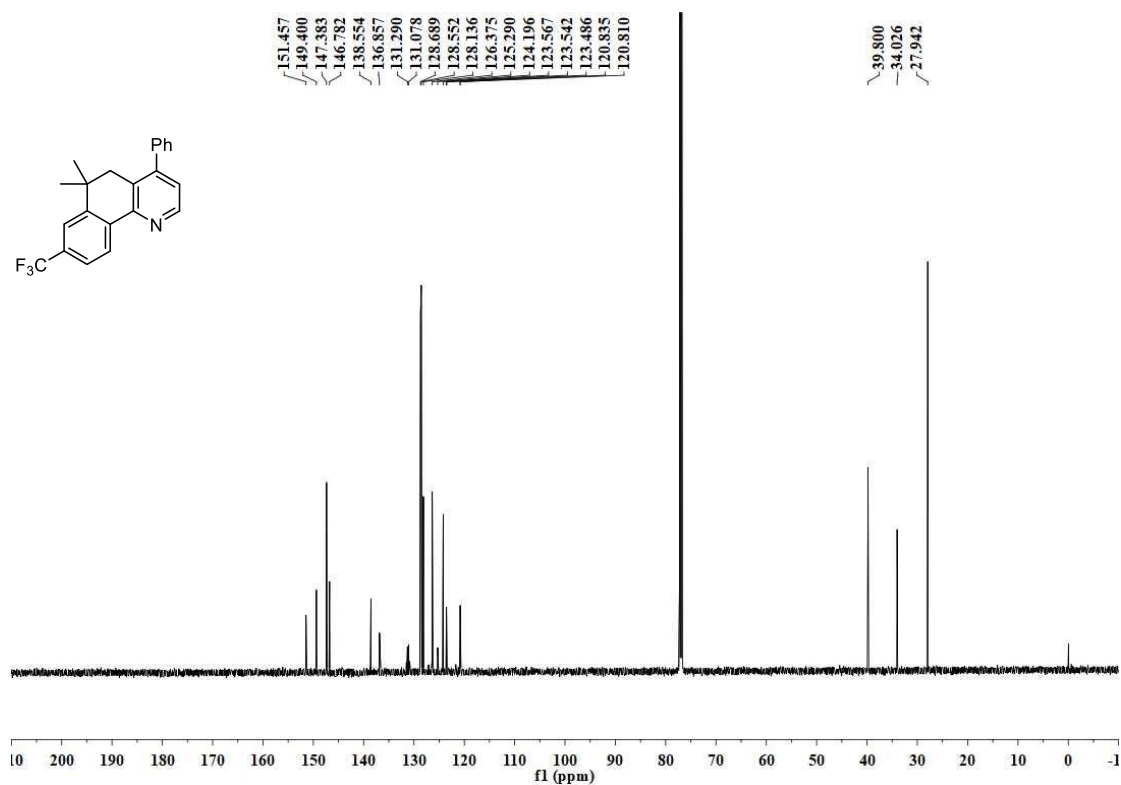

**$^{19}\text{F}$  NMR Spectrum of 9 (565 MHz,  $\text{CDCl}_3$ )**

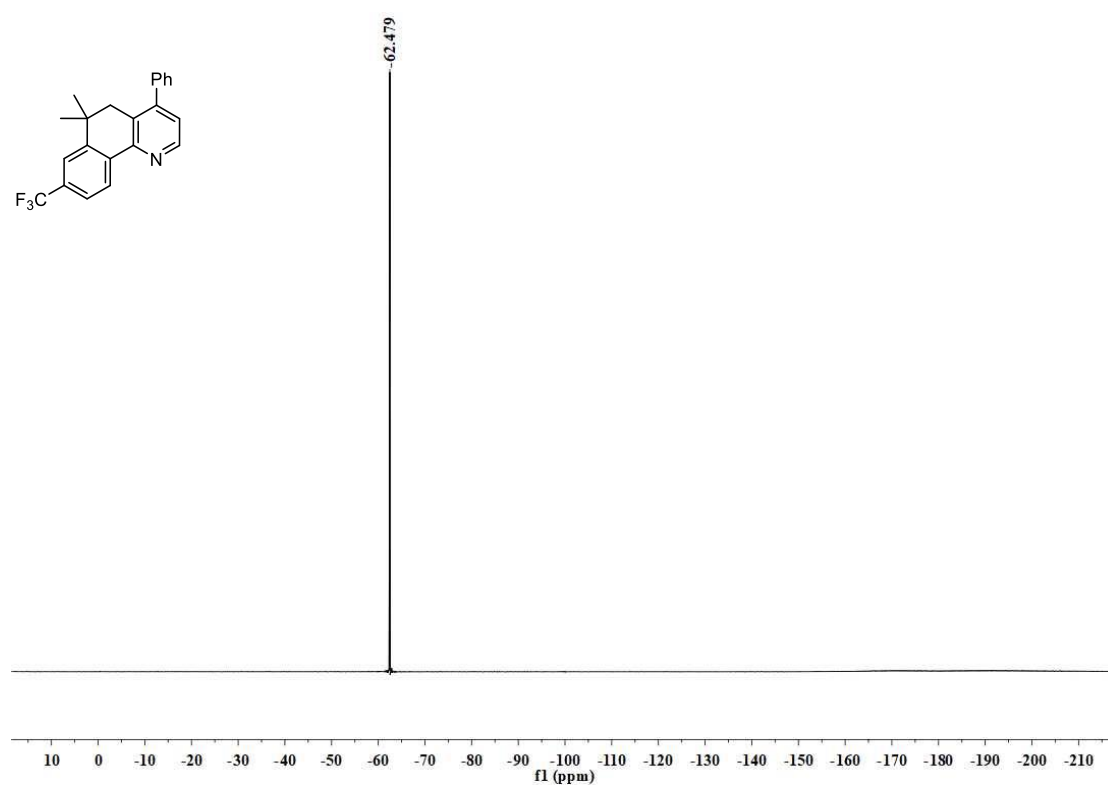

**<sup>1</sup>H NMR Spectrum of 10 (600 MHz, CDCl<sub>3</sub>)**

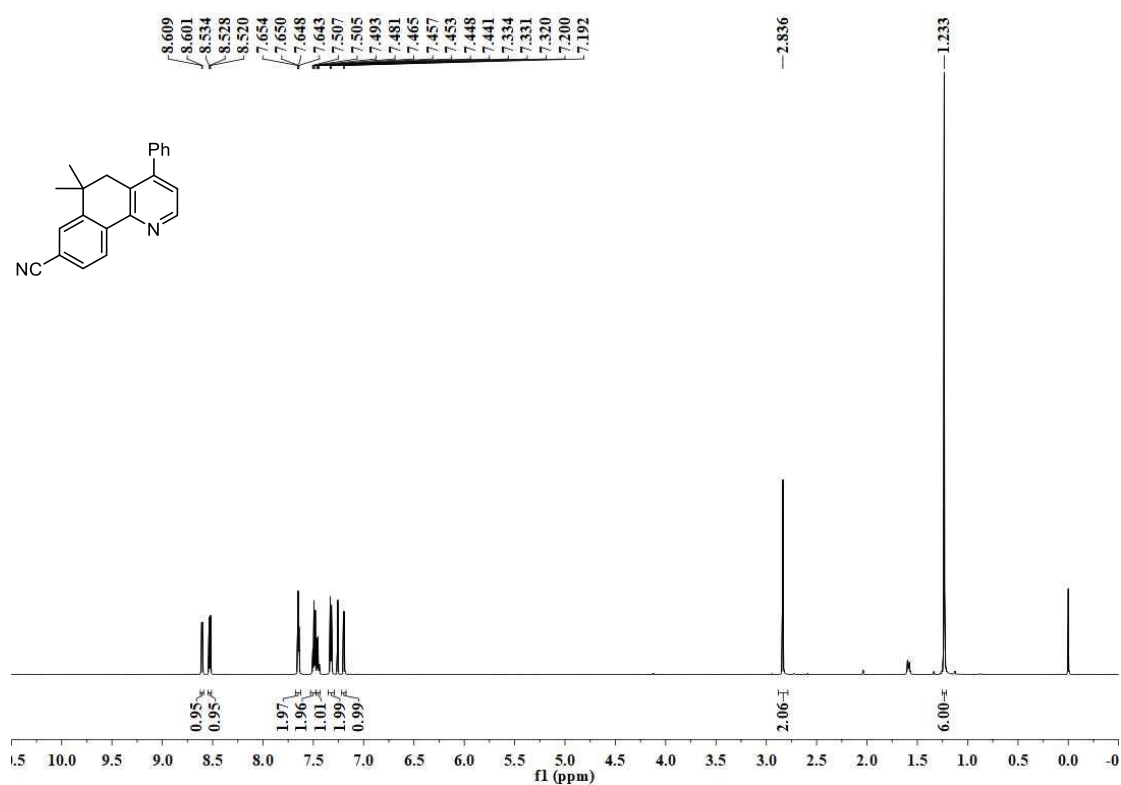

**<sup>13</sup>C NMR Spectrum of 10 (151 MHz, CDCl<sub>3</sub>)**

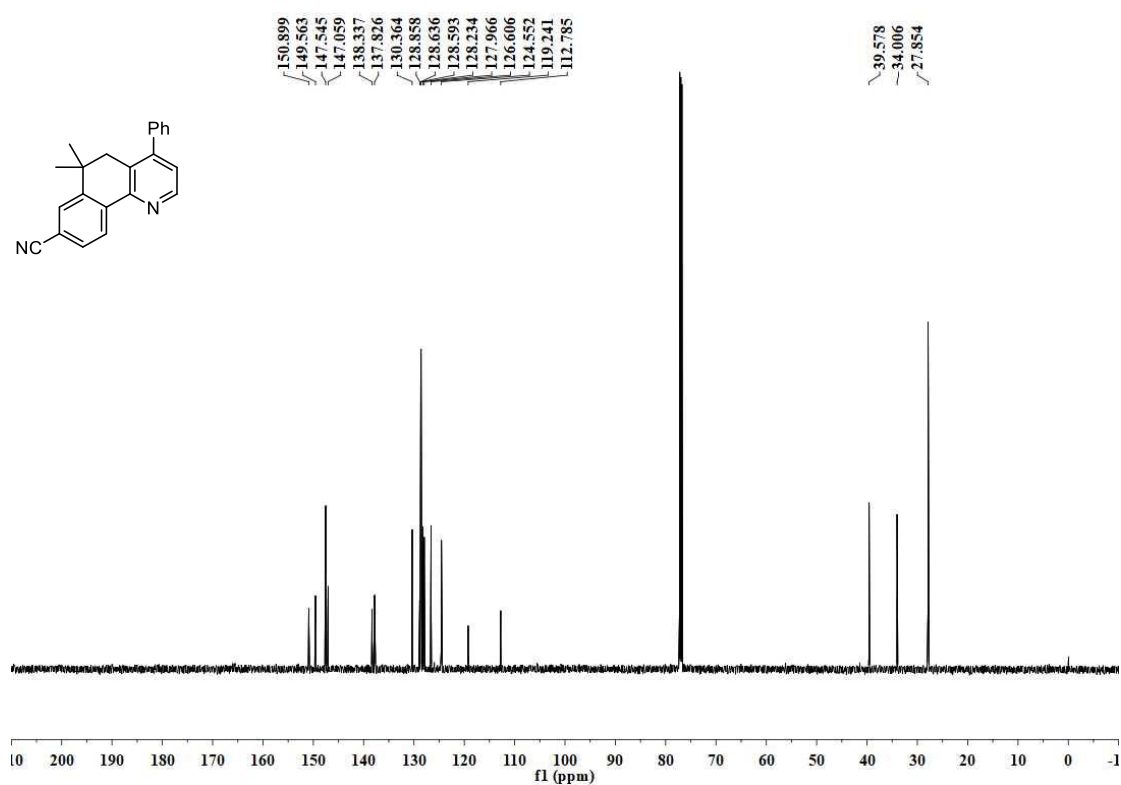



**<sup>1</sup>H NMR Spectrum of 11 (600 MHz, CDCl<sub>3</sub>)**

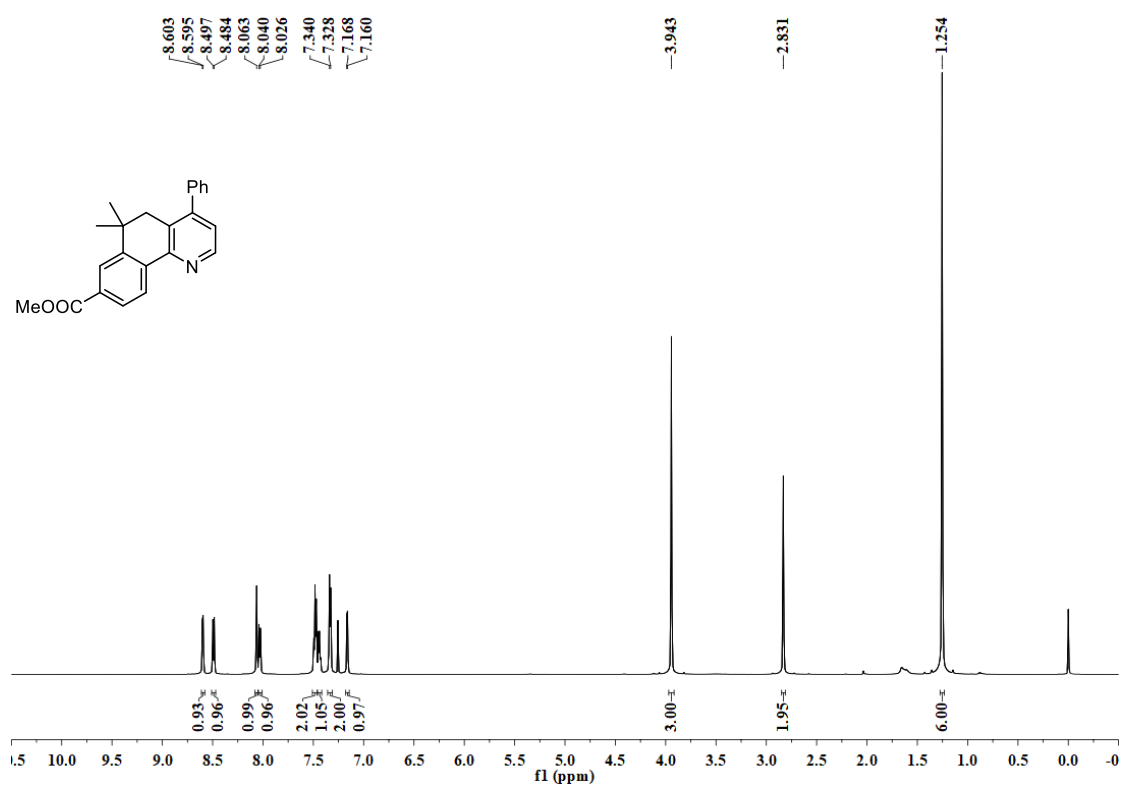

**<sup>13</sup>C NMR Spectrum of 11 (151 MHz, CDCl<sub>3</sub>)**

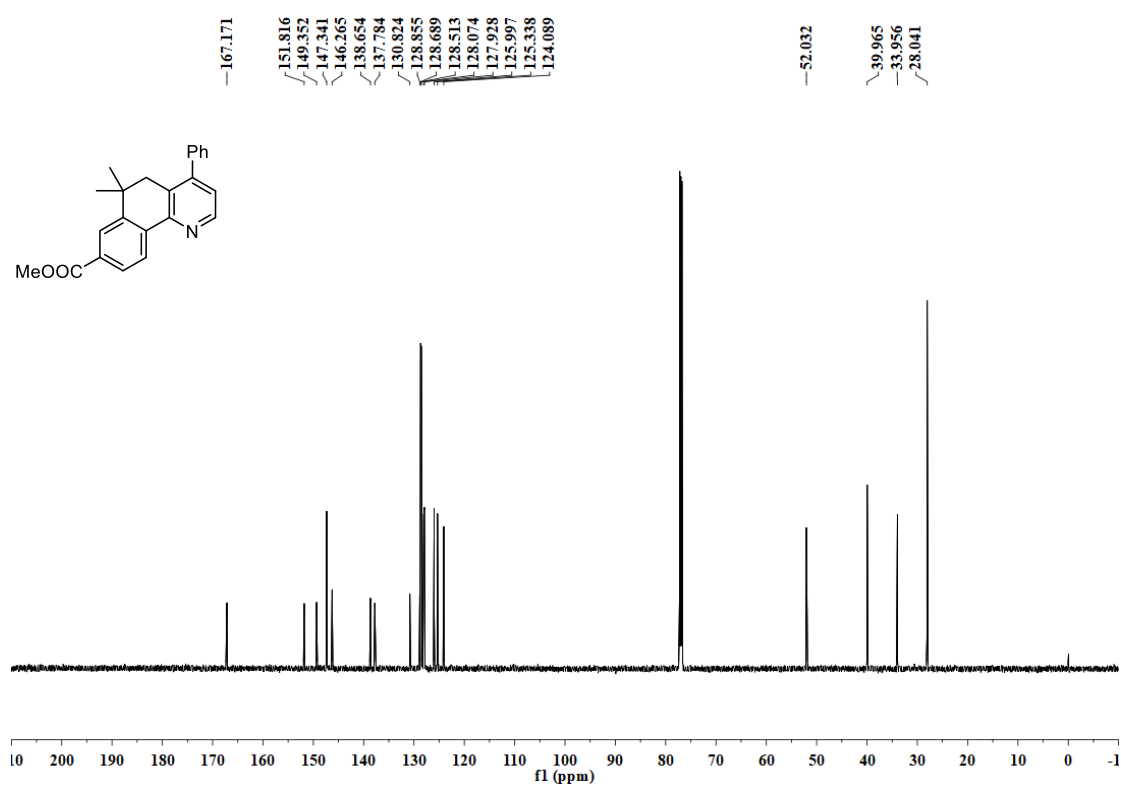

**<sup>1</sup>H NMR Spectrum of 12 (600 MHz, CDCl<sub>3</sub>)**

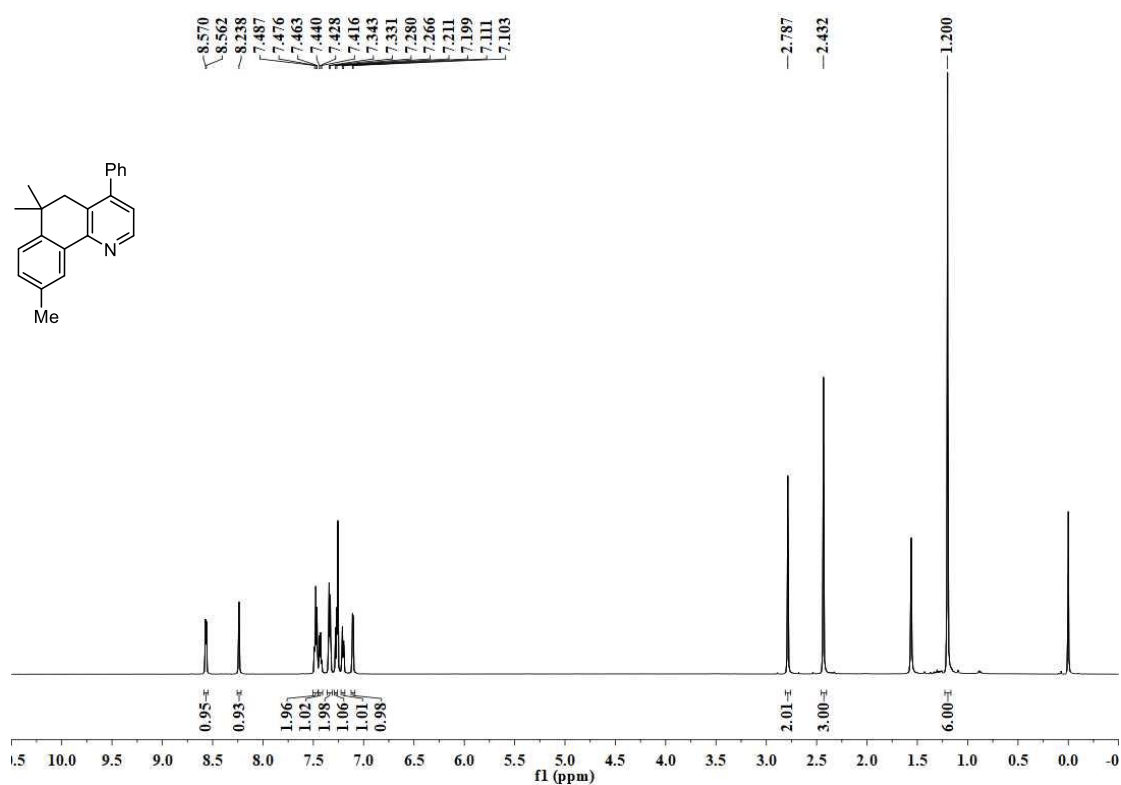

**<sup>13</sup>C NMR Spectrum of 12 (151 MHz, CDCl<sub>3</sub>)**

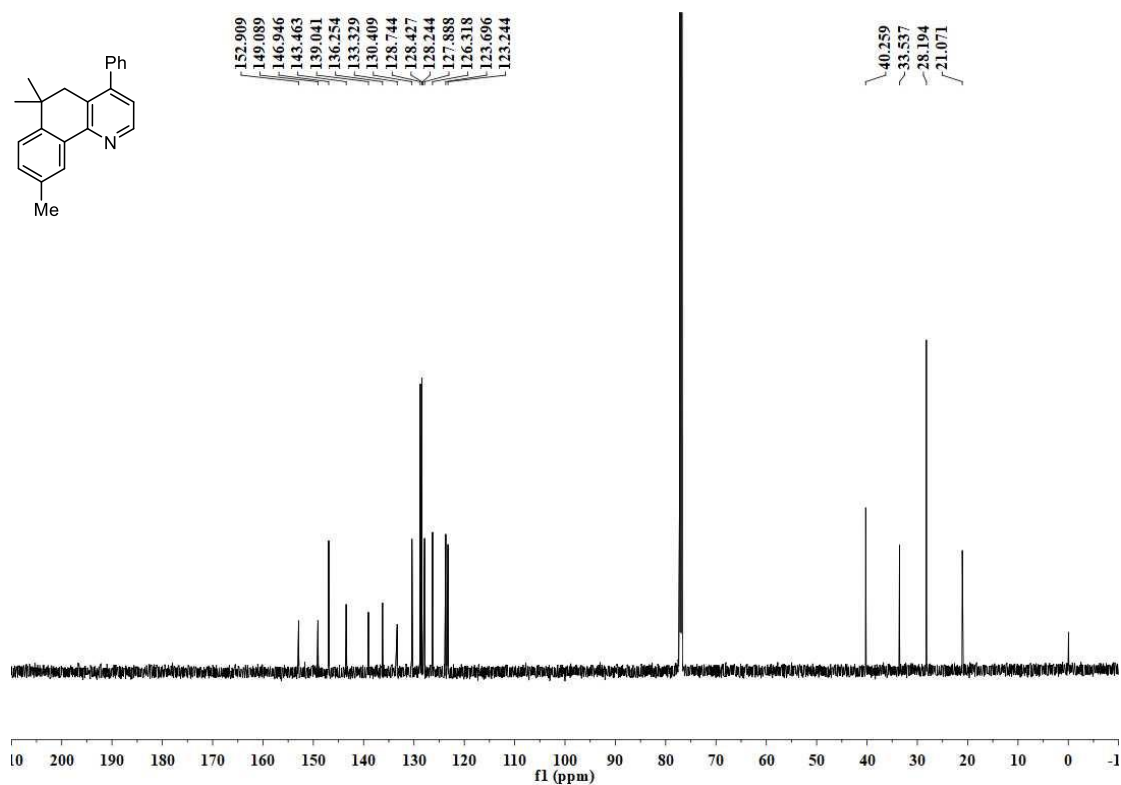

**<sup>1</sup>H NMR Spectrum of 13 (600 MHz, CDCl<sub>3</sub>)**

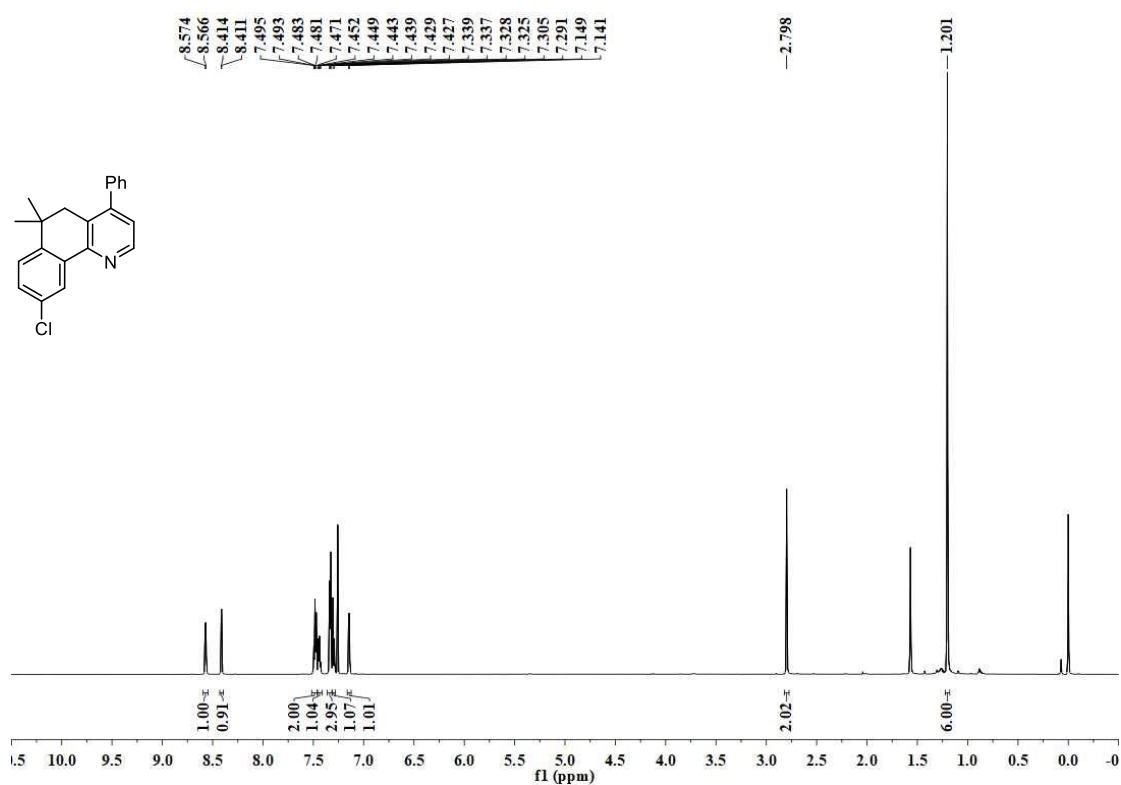

**<sup>13</sup>C NMR Spectrum of 13 (151 MHz, CDCl<sub>3</sub>)**

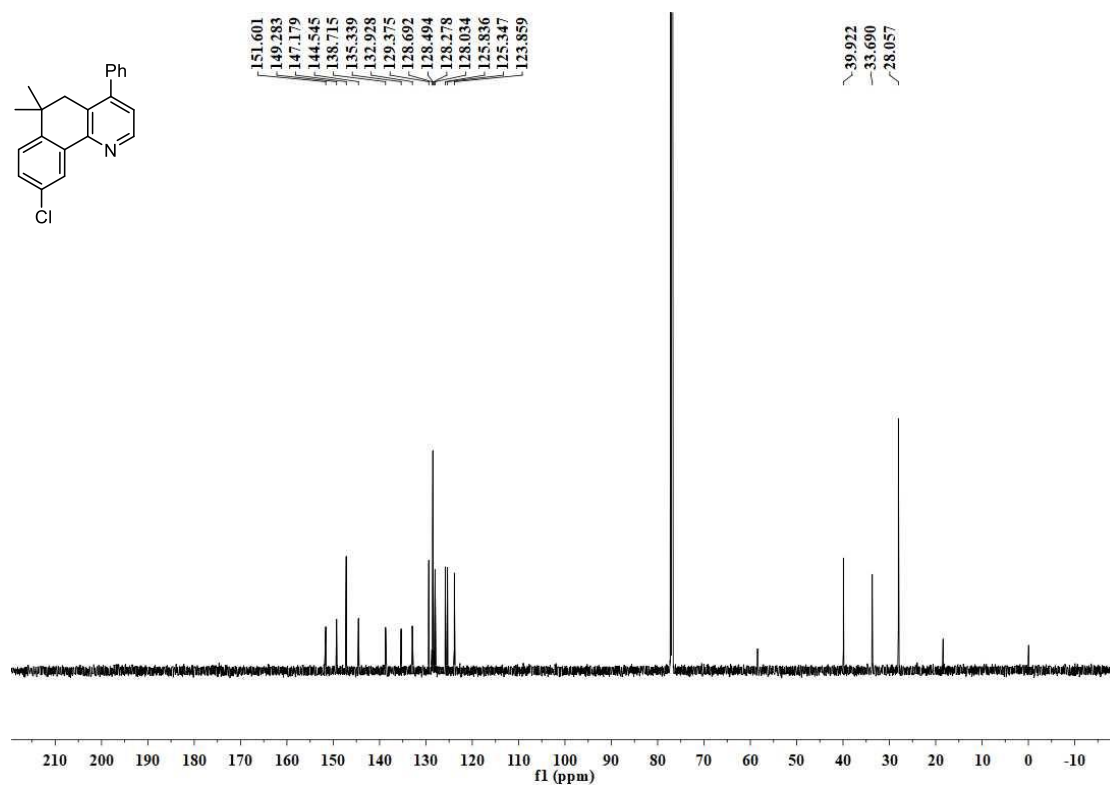

**<sup>1</sup>H NMR Spectrum of 14 (600 MHz, CDCl<sub>3</sub>)**

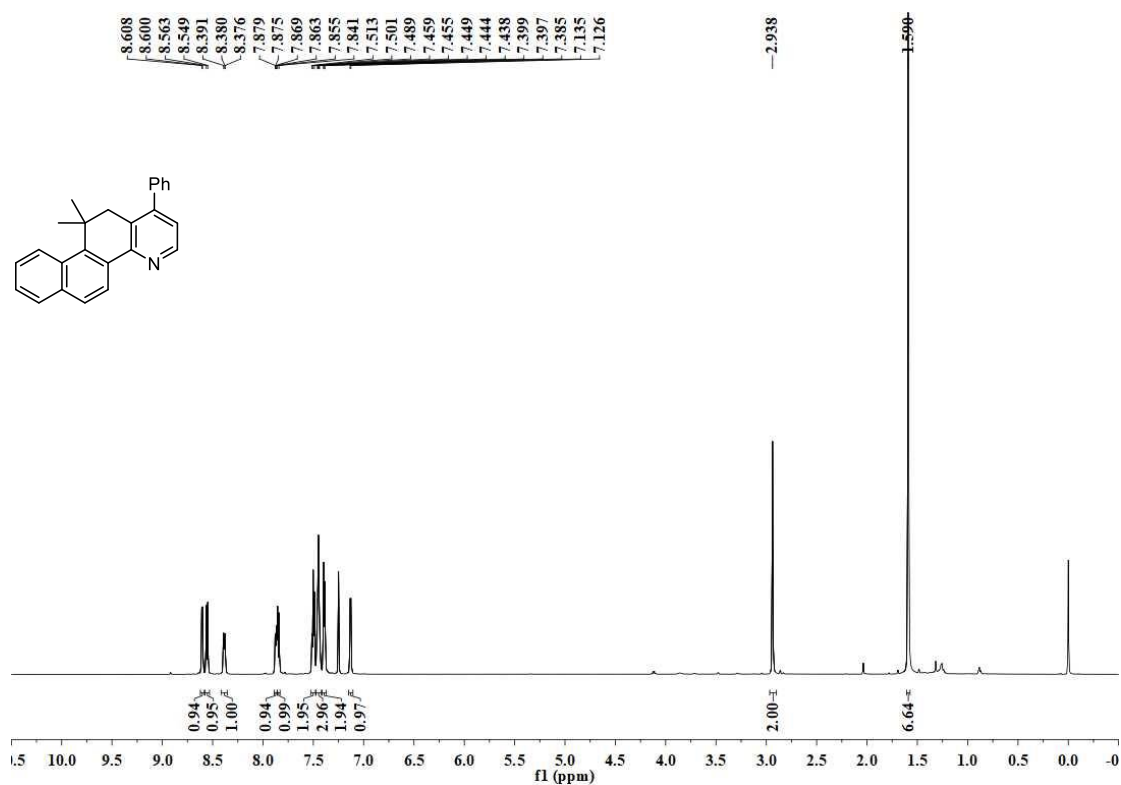

**<sup>13</sup>C NMR Spectrum of 14 (151 MHz, CDCl<sub>3</sub>)**

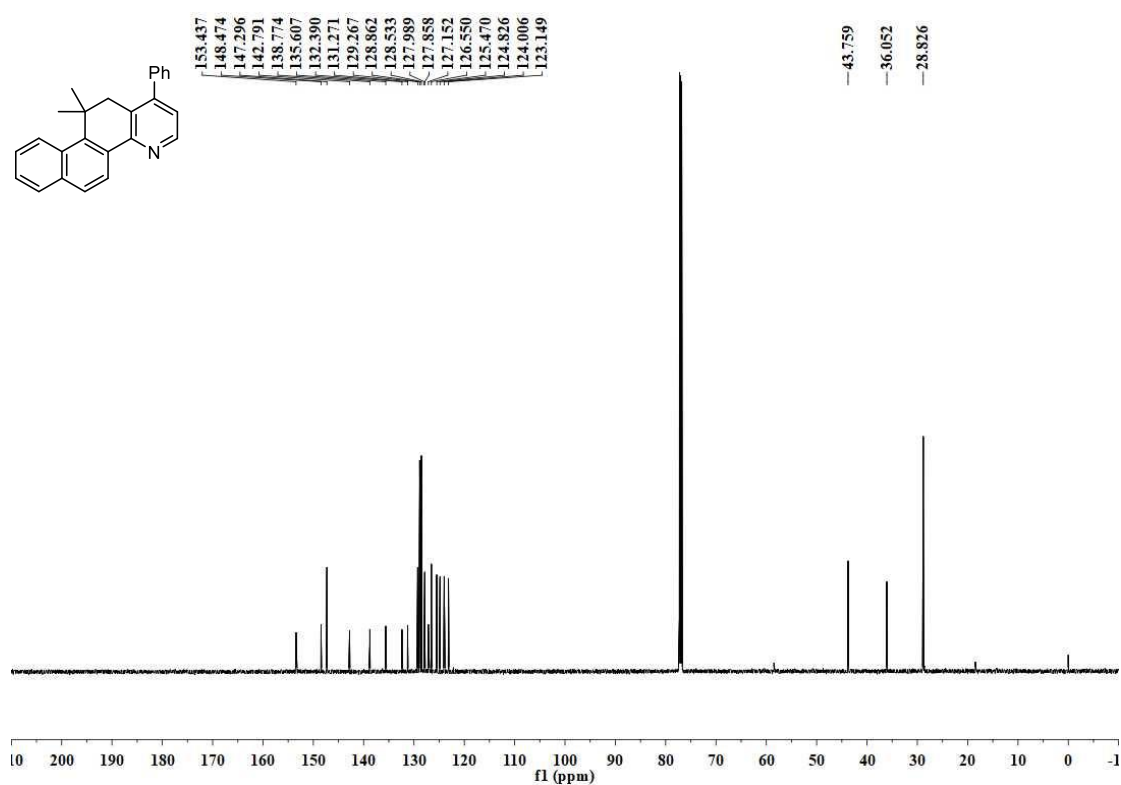

**<sup>1</sup>H NMR Spectrum of 15 (600 MHz, CDCl<sub>3</sub>)**

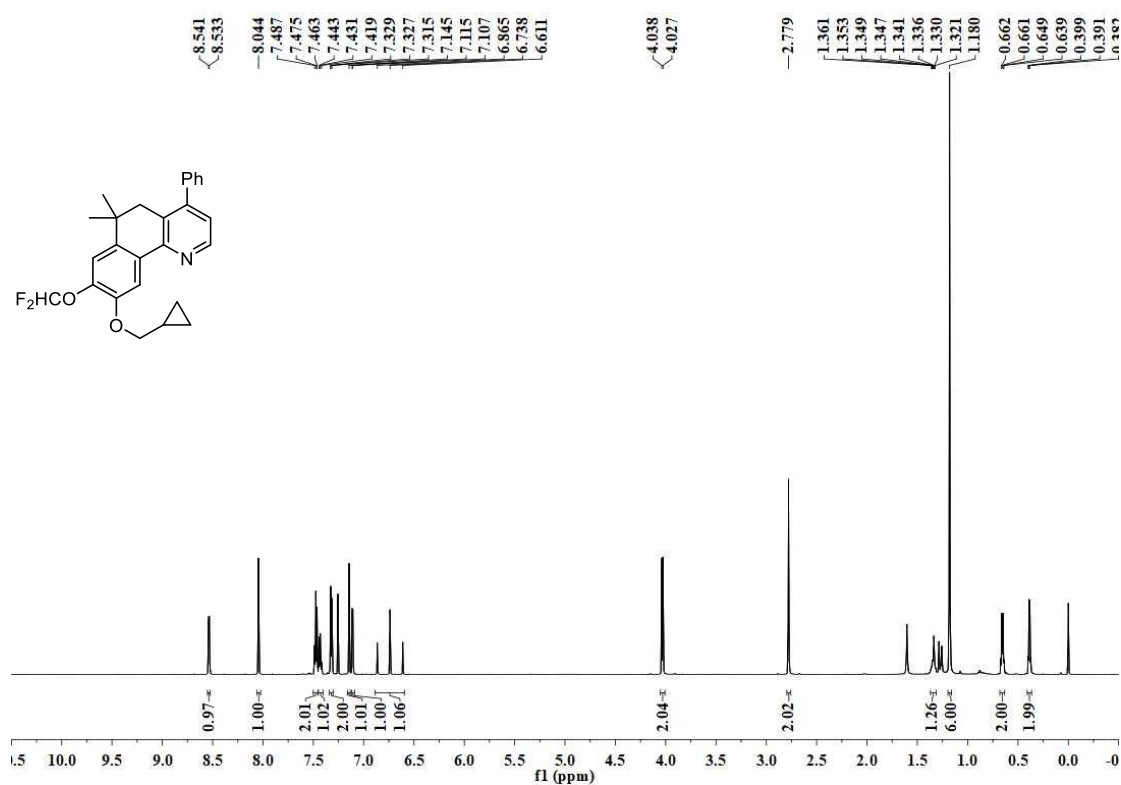

**<sup>13</sup>C NMR Spectrum of 15 (151 MHz, CDCl<sub>3</sub>)**

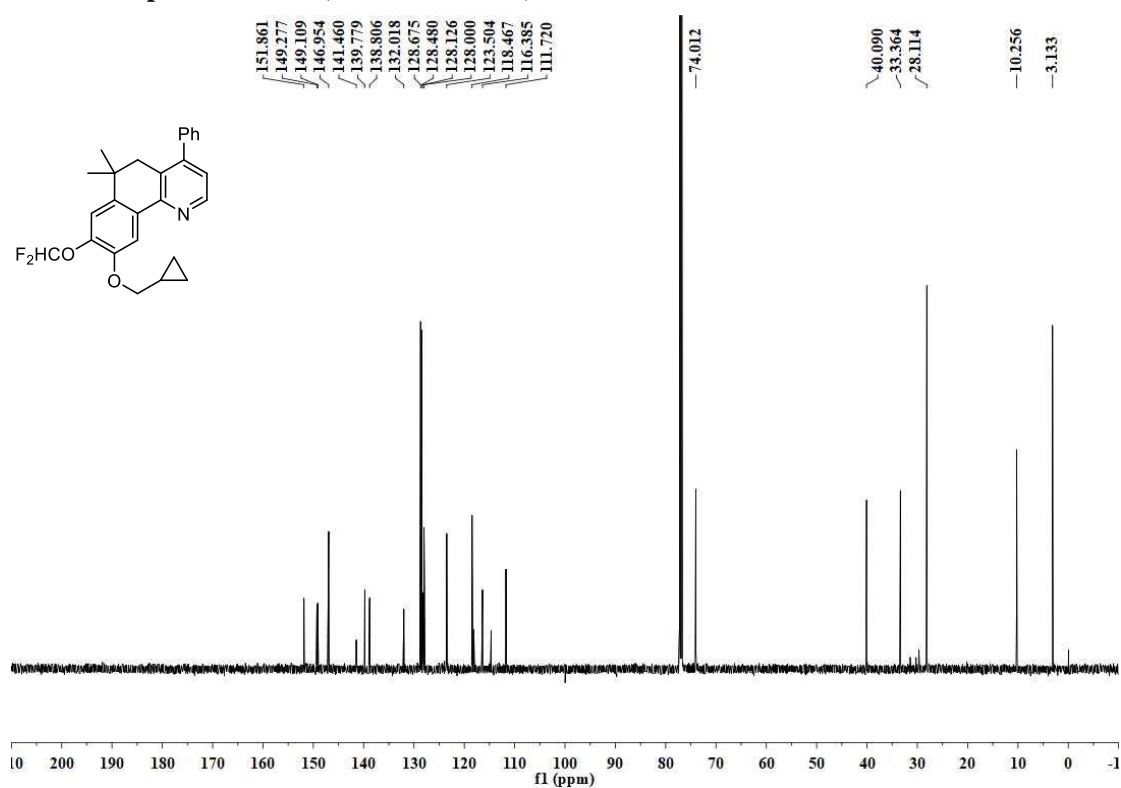

**$^{19}\text{F}$  NMR Spectrum of 15 (565 MHz,  $\text{CDCl}_3$ )**

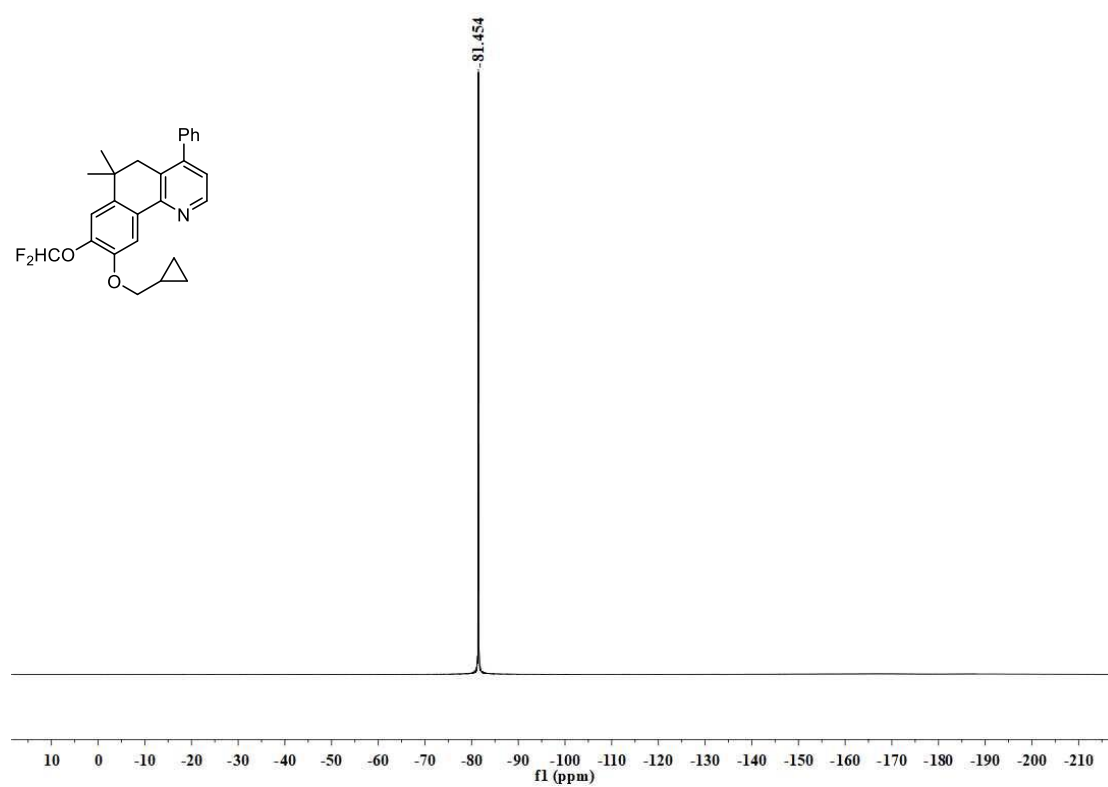

**$^1\text{H}$  NMR Spectrum of 16 (600 MHz,  $\text{CDCl}_3$ )**

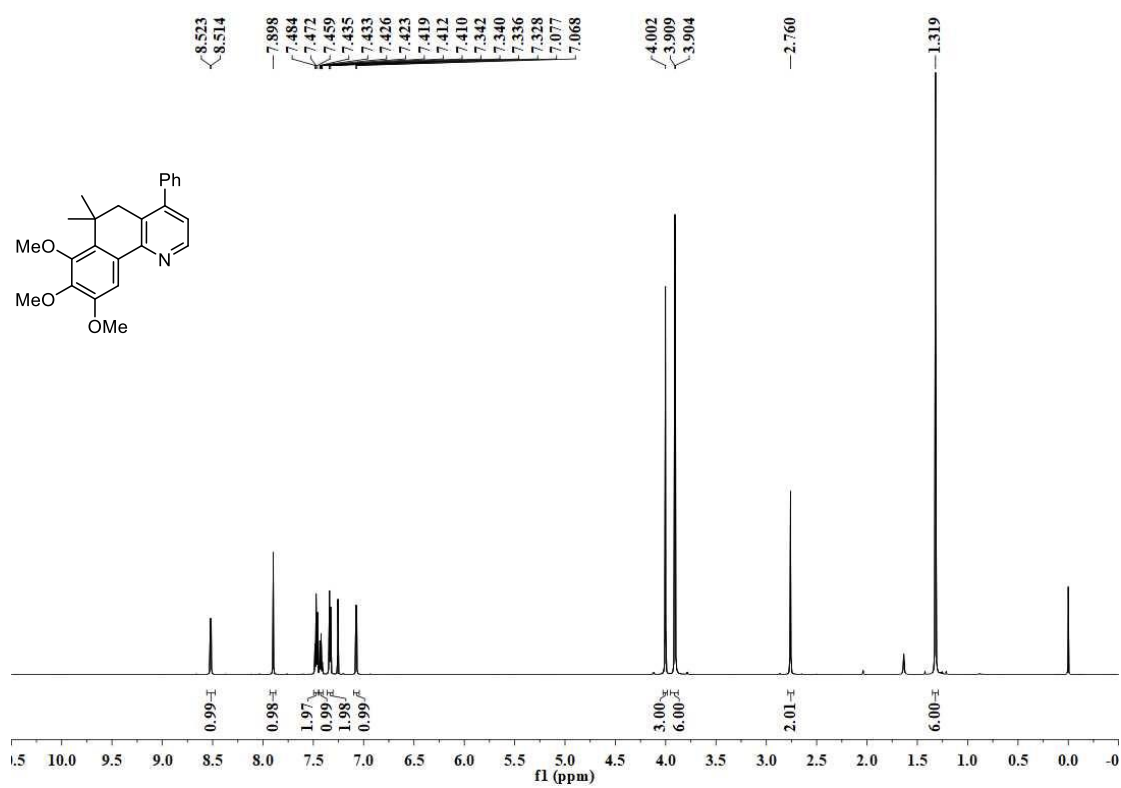

**$^{13}\text{C}$  NMR Spectrum of 16 (151 MHz,  $\text{CDCl}_3$ )**

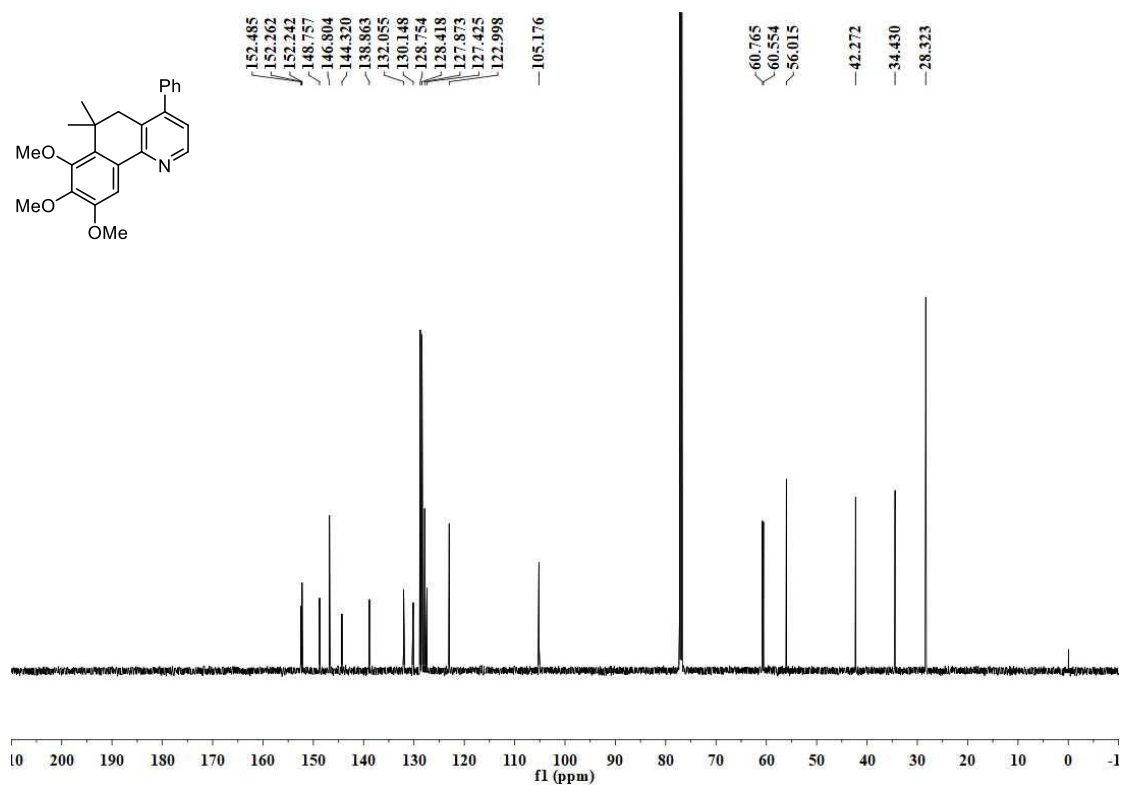

**$^1\text{H}$  NMR Spectrum of 17 (600 MHz,  $\text{CDCl}_3$ )**

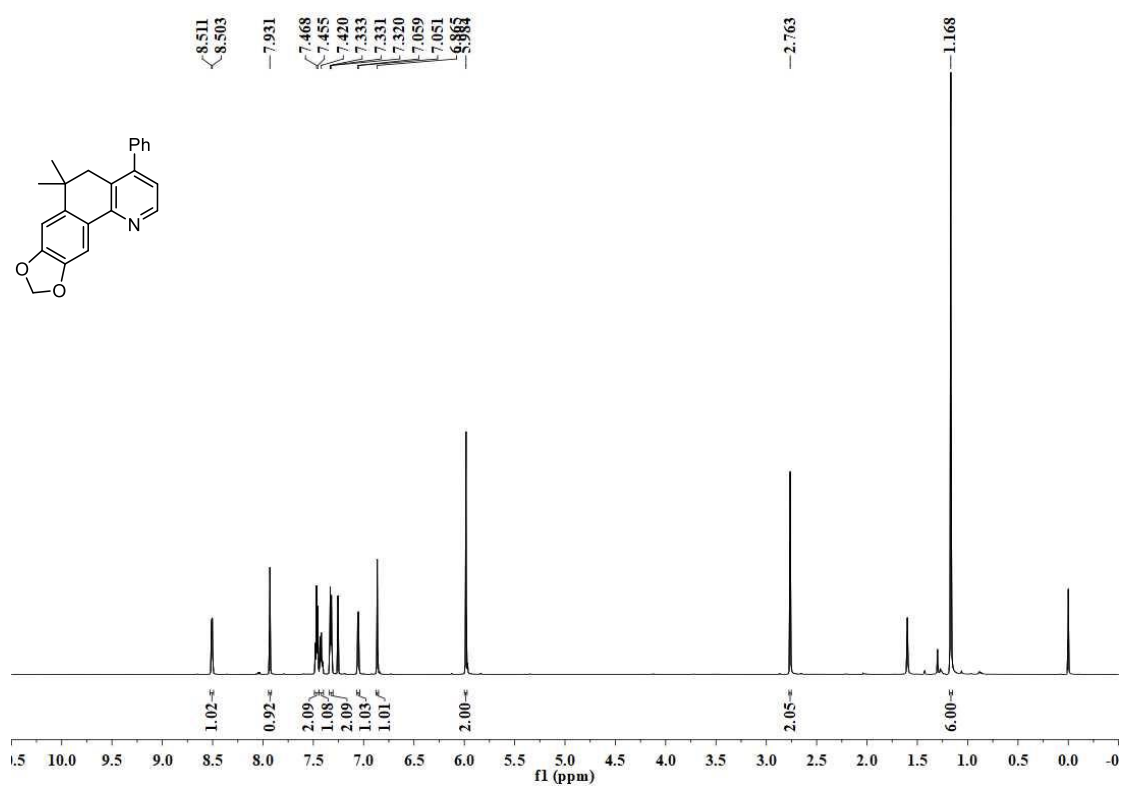

**$^{13}\text{C}$  NMR Spectrum of 17 (151 MHz,  $\text{CDCl}_3$ )**

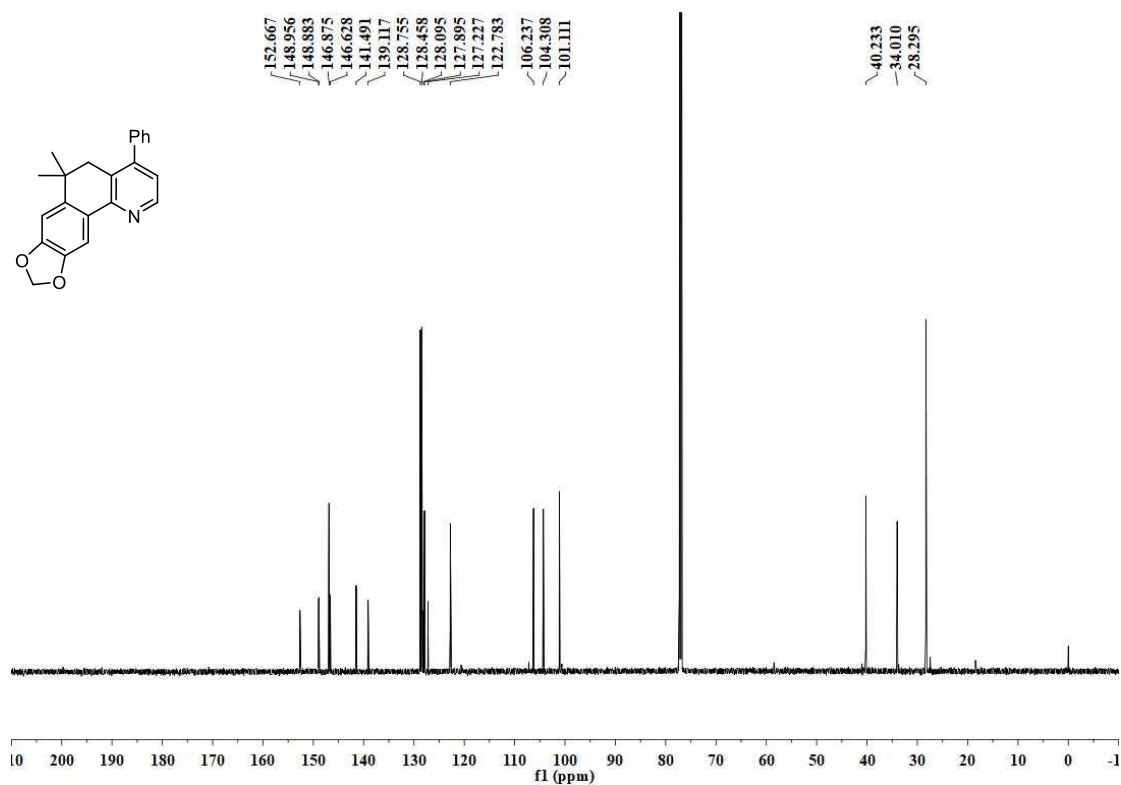

**$^1\text{H}$  NMR Spectrum of 18 (600 MHz,  $\text{CDCl}_3$ )**

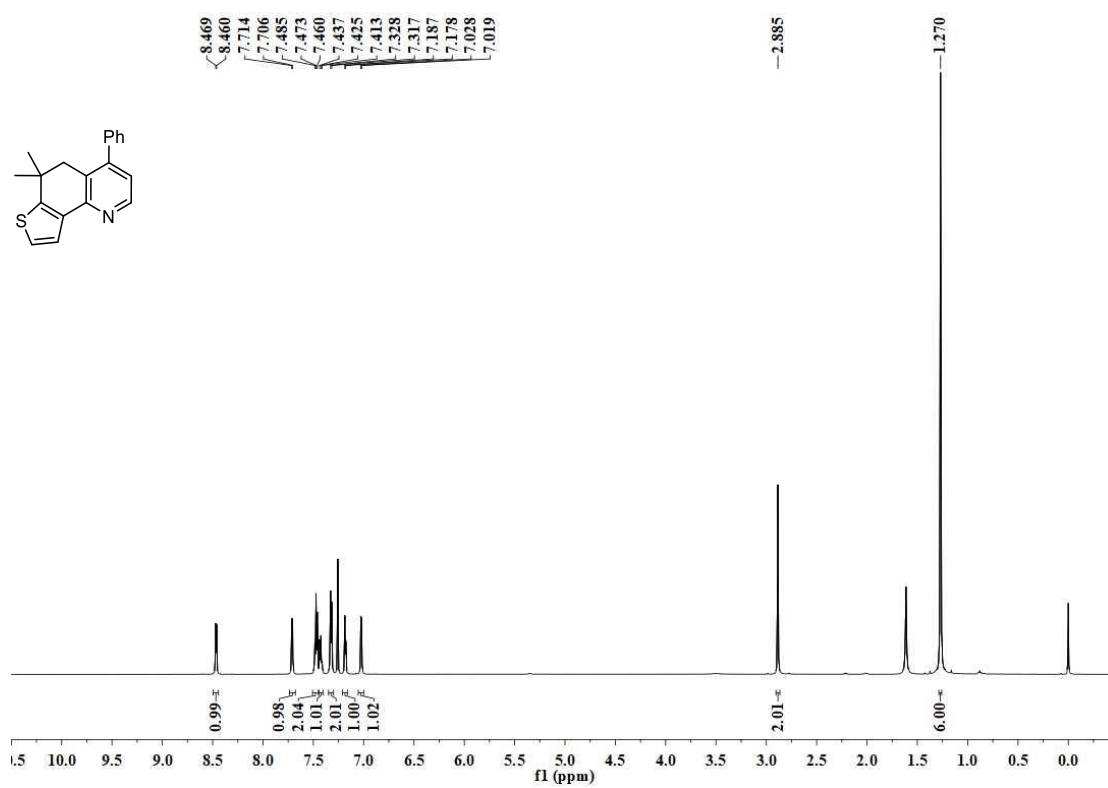



**$^{13}\text{C}$  NMR Spectrum of 18 (151 MHz,  $\text{CDCl}_3$ )**

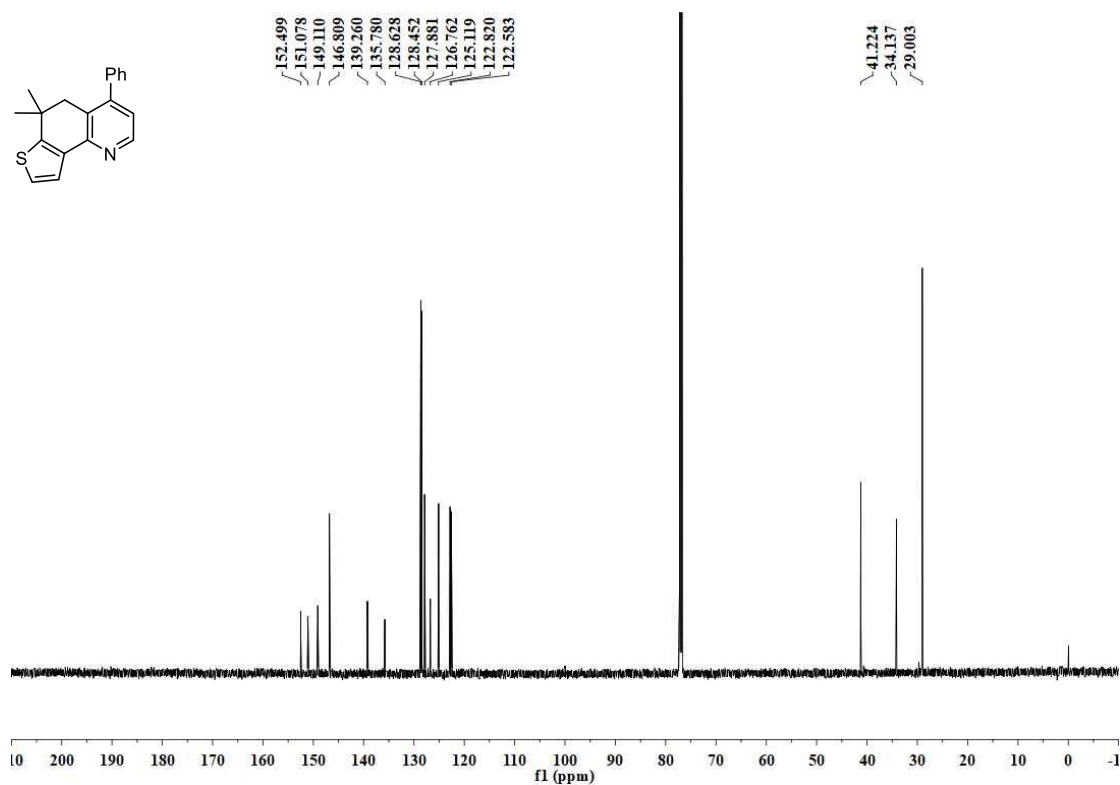

**$^1\text{H}$  NMR Spectrum of 19 (600 MHz,  $\text{CDCl}_3$ )**

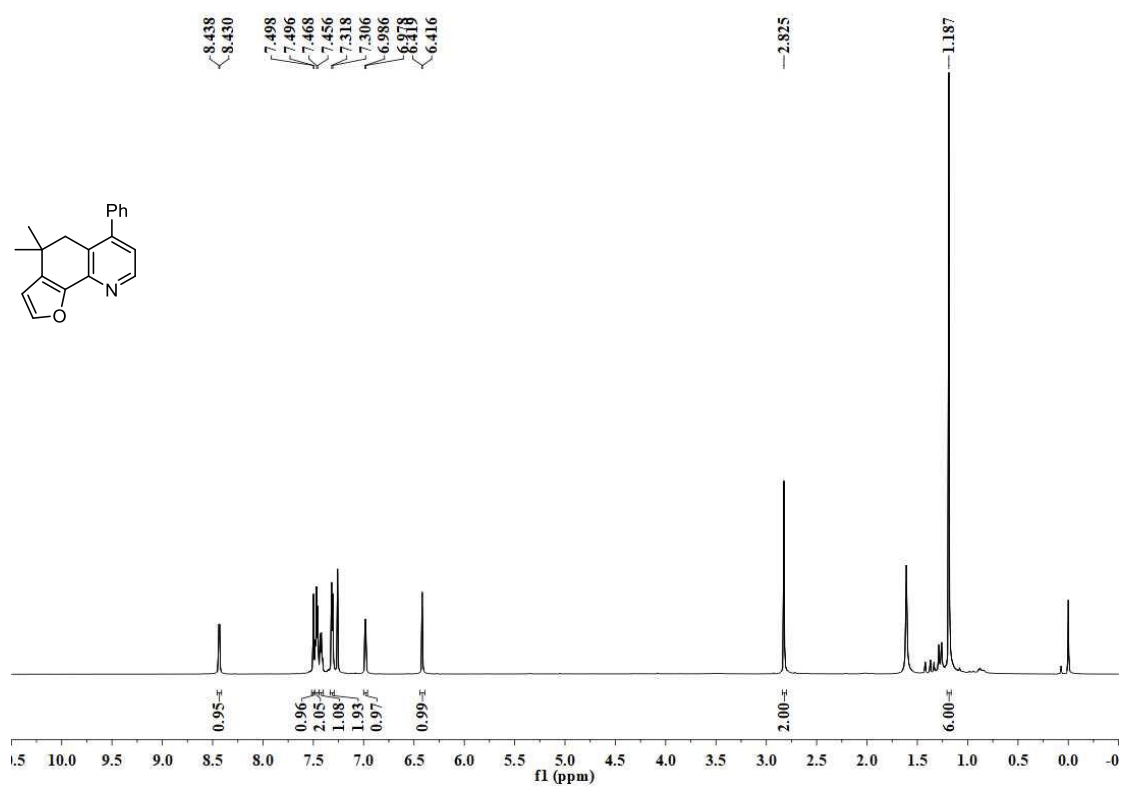

**$^{13}\text{C}$  NMR Spectrum of **19** (151 MHz,  $\text{CDCl}_3$ )**

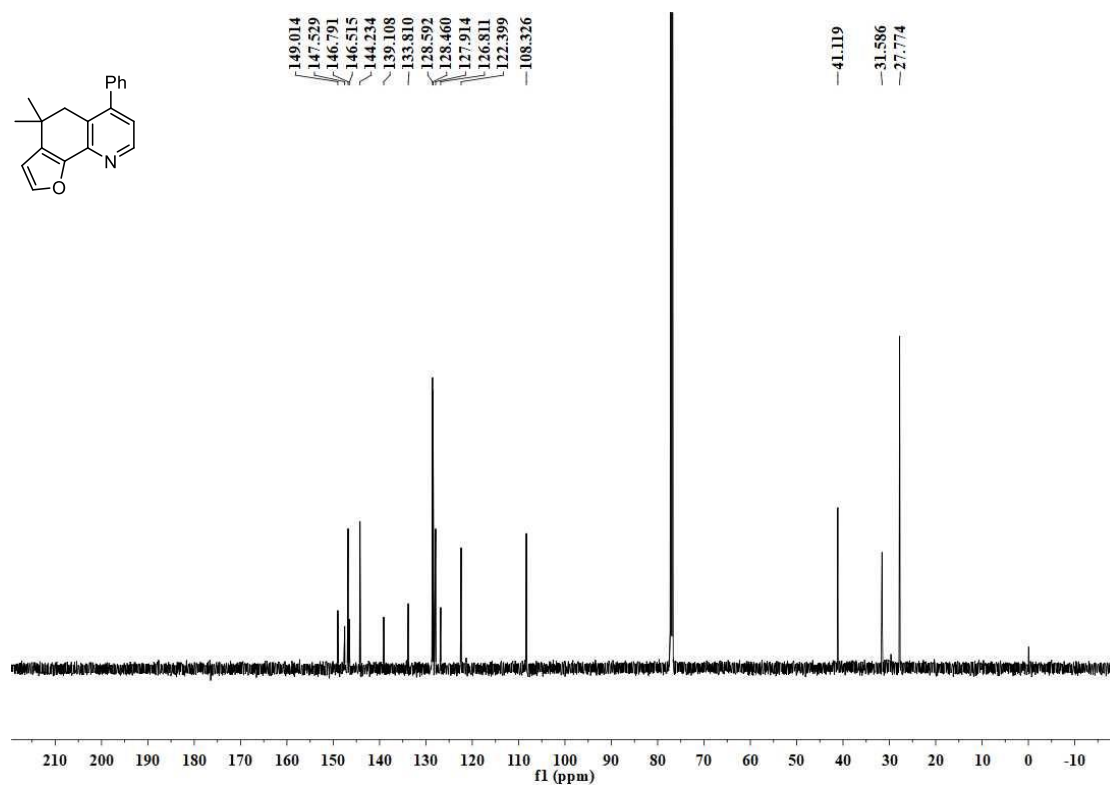

**$^1\text{H}$  NMR Spectrum of **20** (600 MHz,  $\text{CDCl}_3$ )**

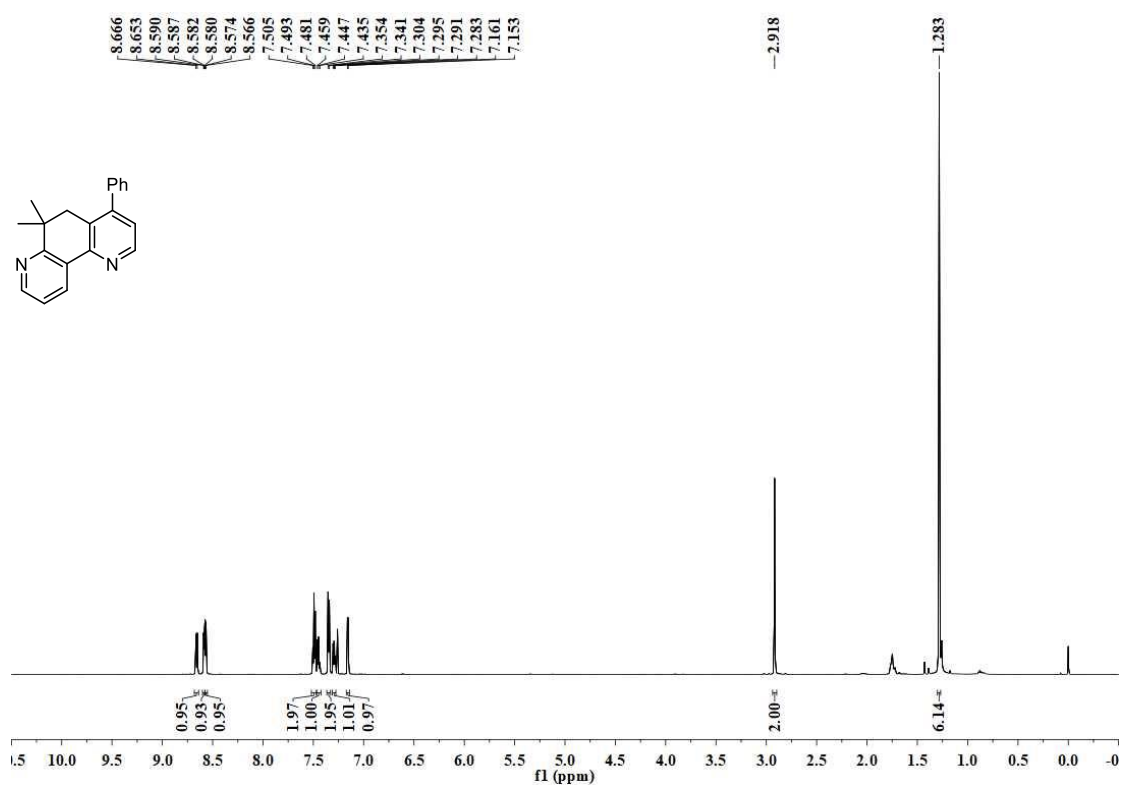

**$^{13}\text{C}$  NMR Spectrum of 20 (151 MHz,  $\text{CDCl}_3$ )**

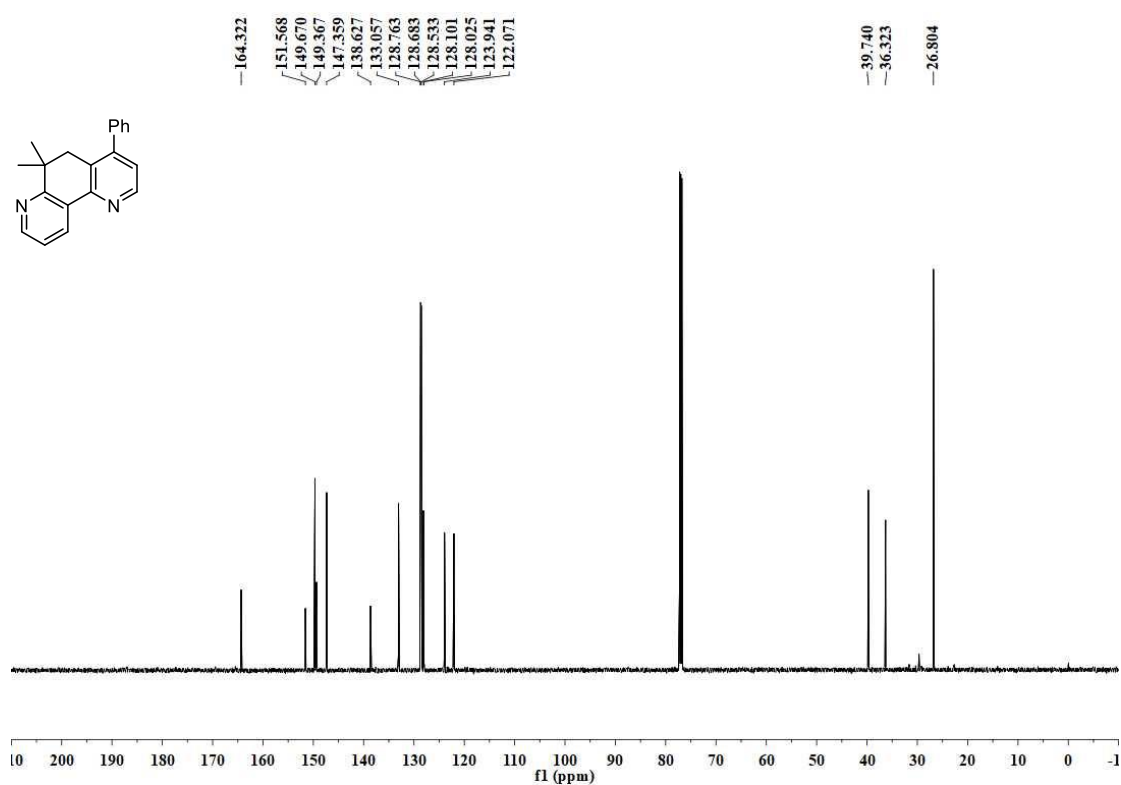

**$^1\text{H}$  NMR Spectrum of 21 (600 MHz,  $\text{CDCl}_3$ )**

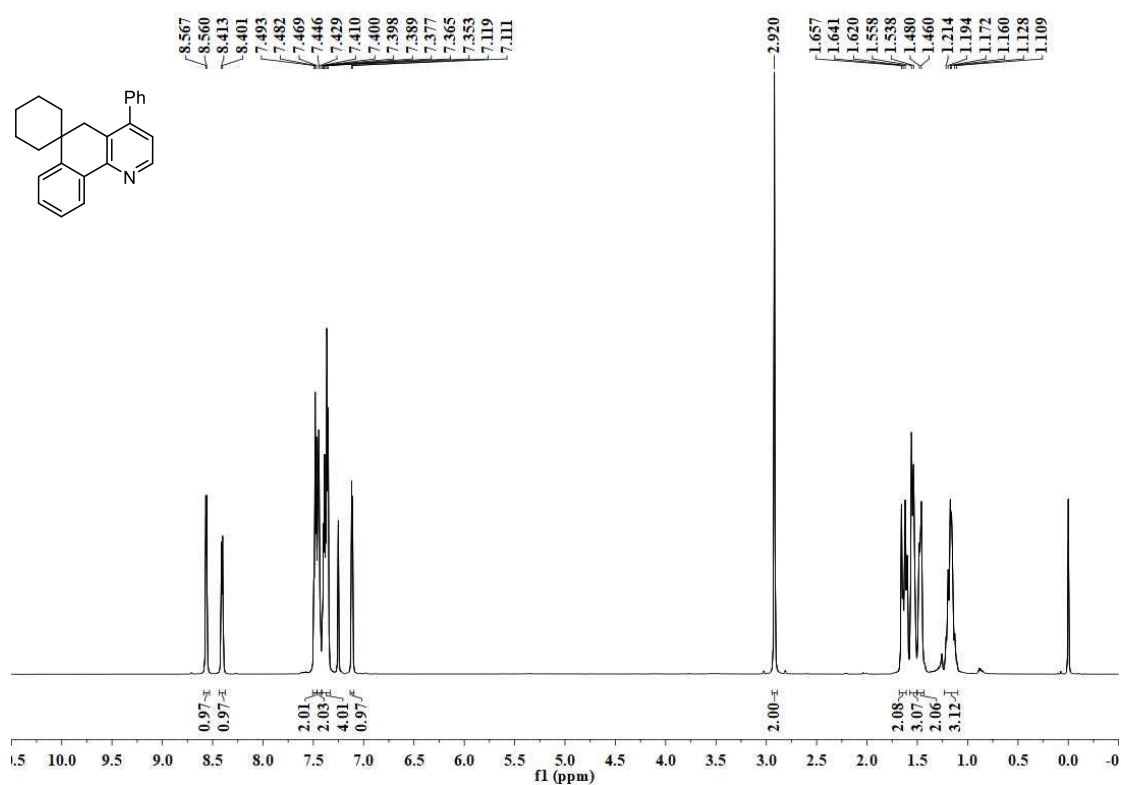

**$^{13}\text{C}$  NMR Spectrum of 21 (151 MHz,  $\text{CDCl}_3$ )**

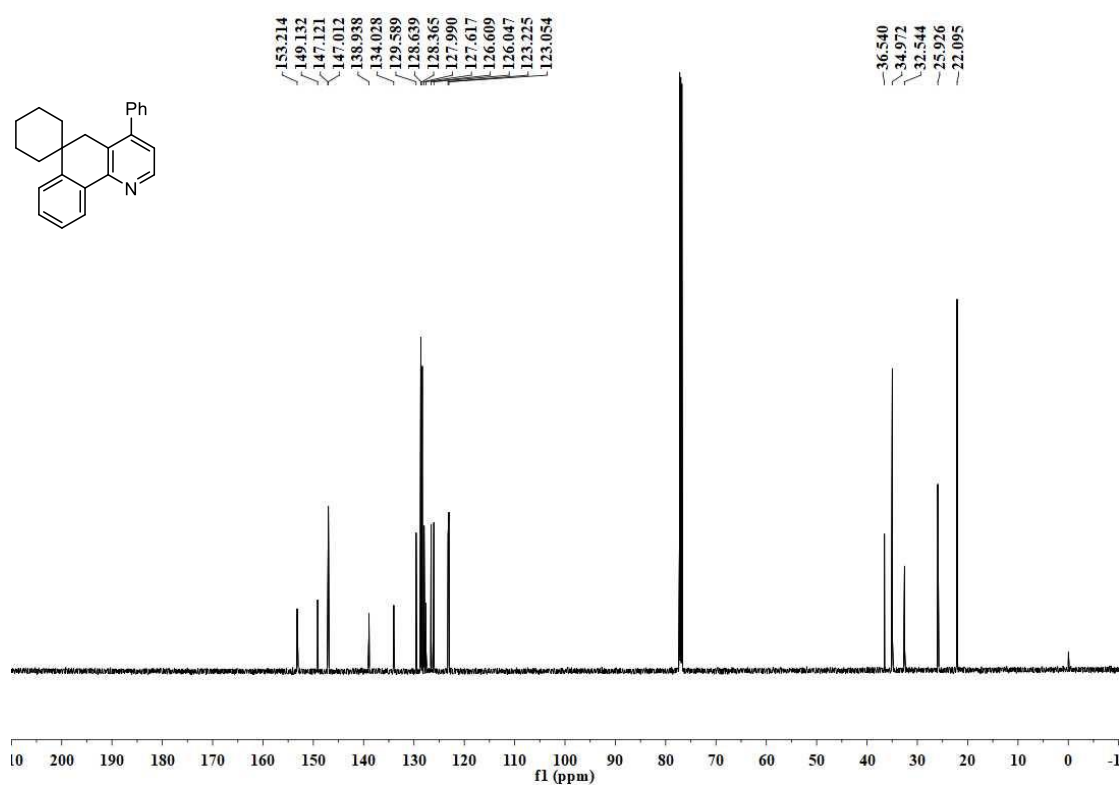

**$^1\text{H}$  NMR Spectrum of 22 (600 MHz,  $\text{CDCl}_3$ )**

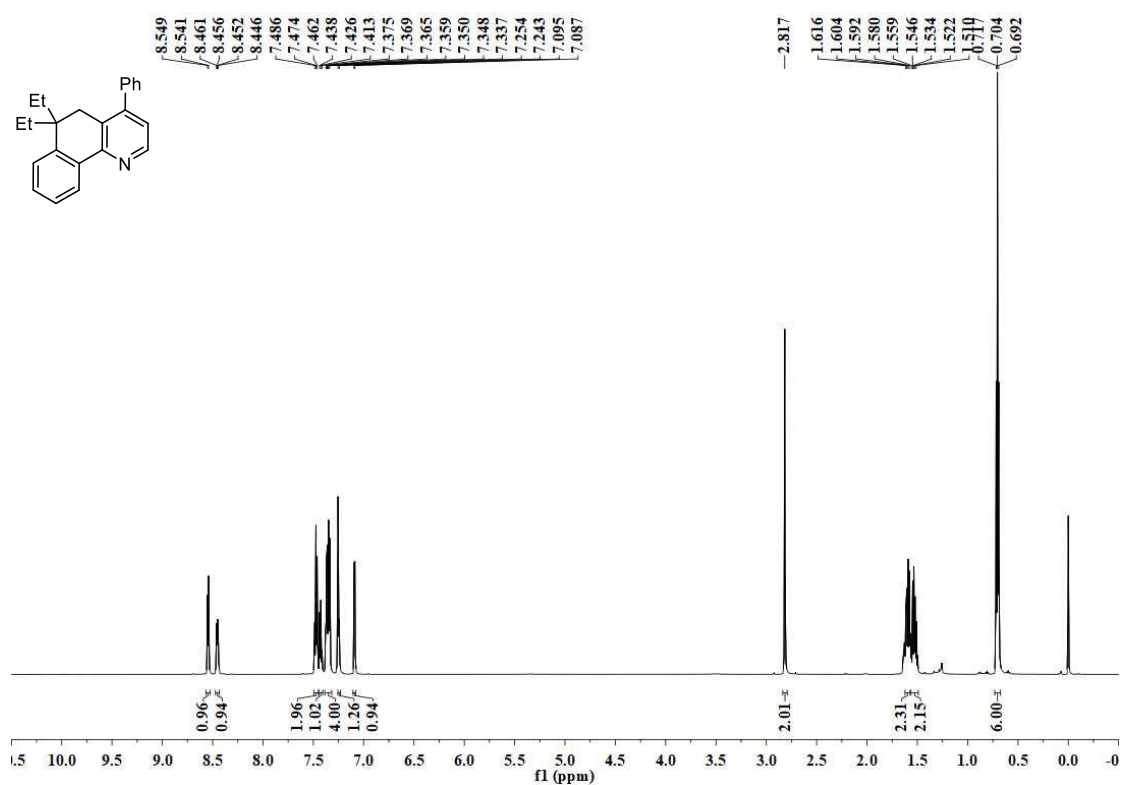

**$^{13}\text{C}$  NMR Spectrum of 22 (151 MHz,  $\text{CDCl}_3$ )**

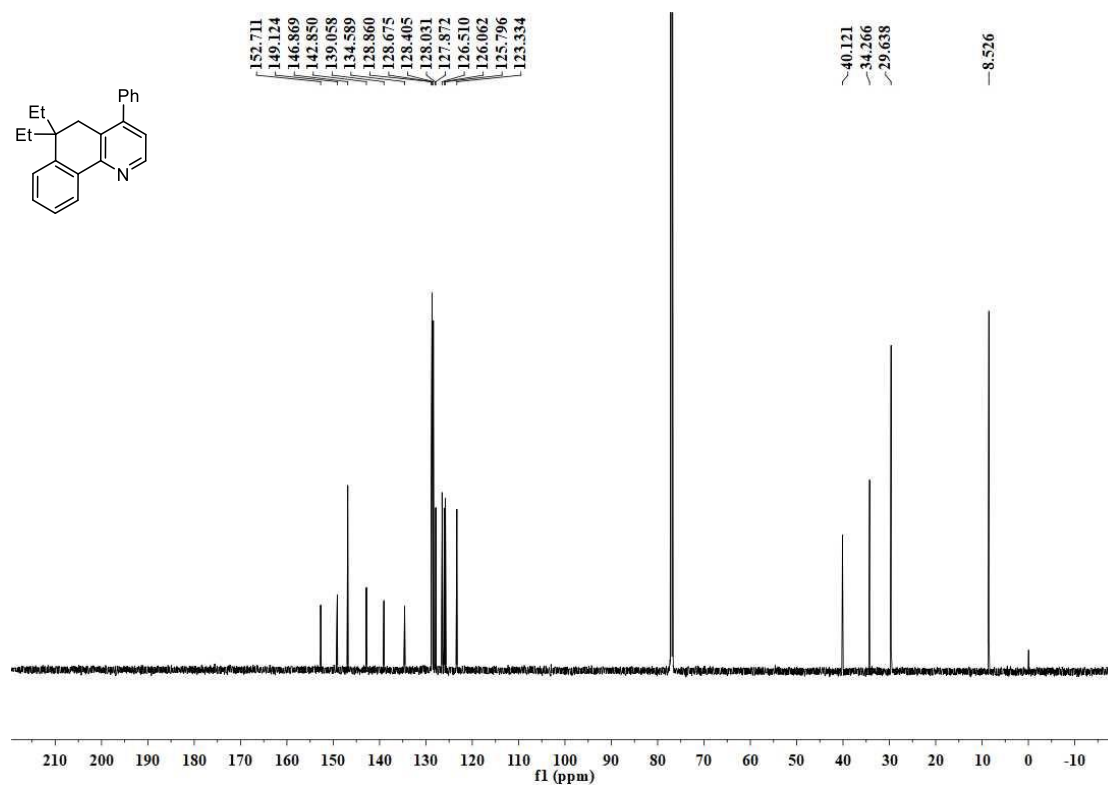

**$^1\text{H}$  NMR Spectrum of 23 (600 MHz,  $\text{CDCl}_3$ )**

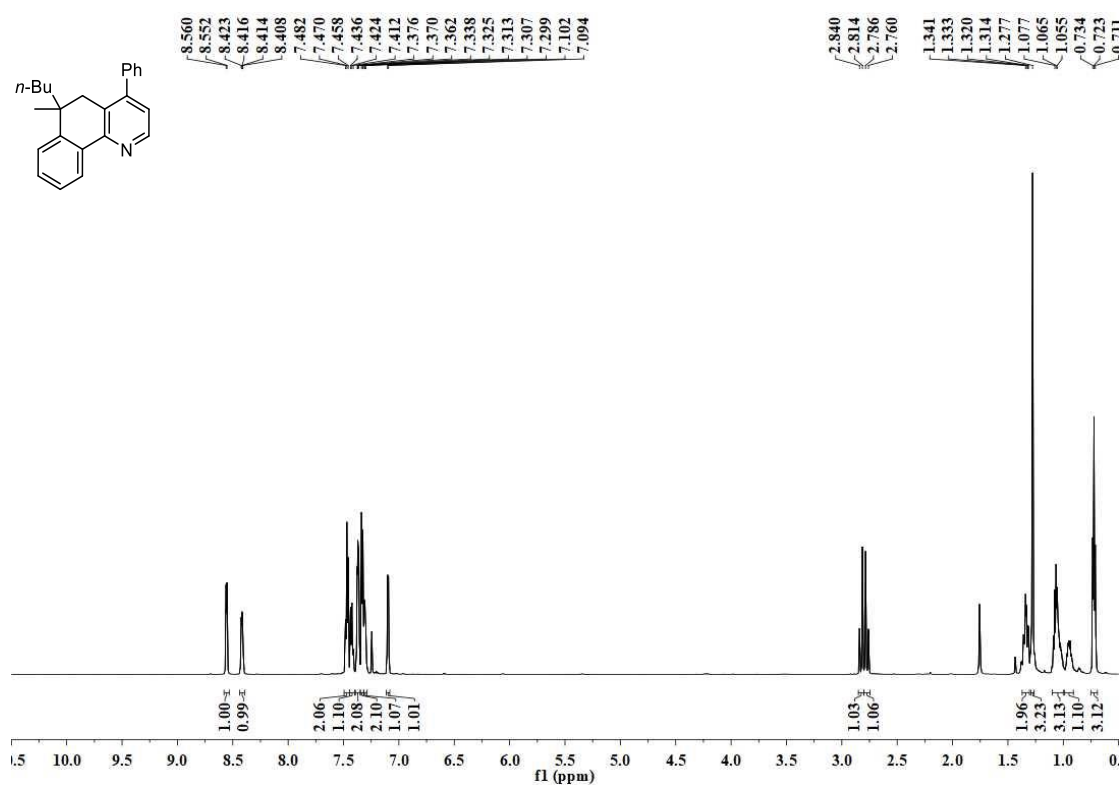

**$^{13}\text{C}$  NMR Spectrum of 23 (151 MHz,  $\text{CDCl}_3$ )**

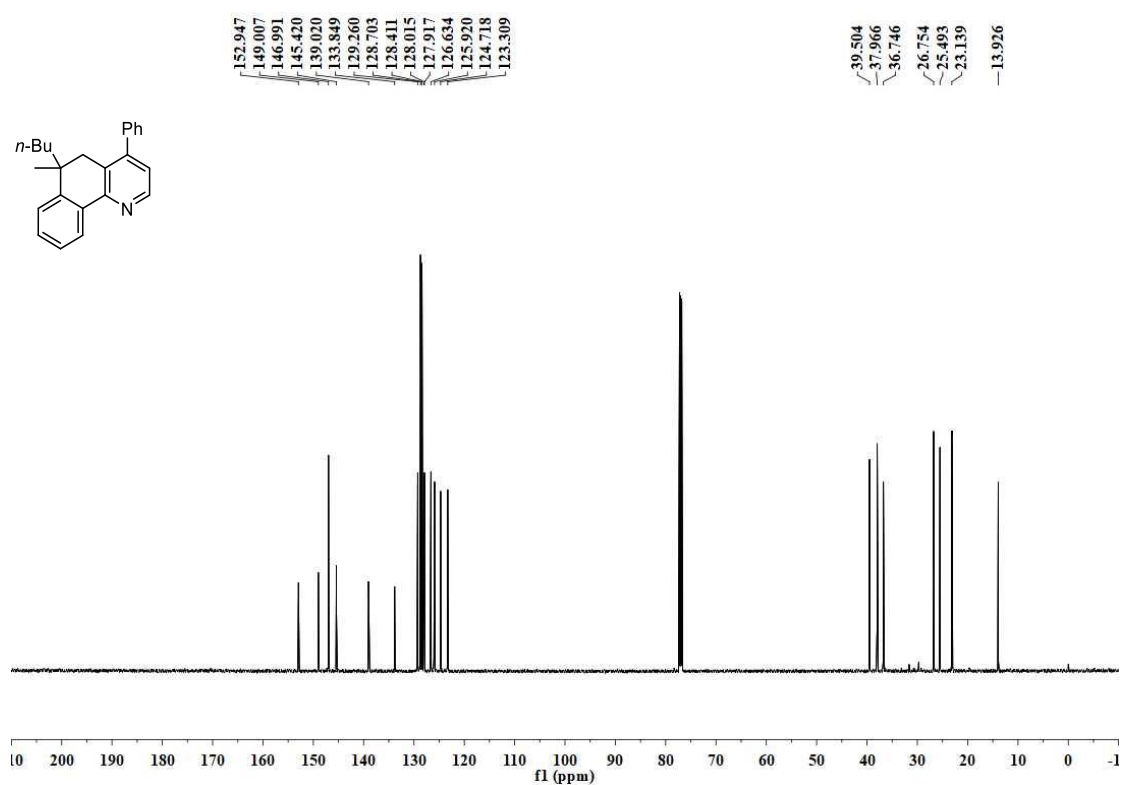

**$^1\text{H}$  NMR Spectrum of 24 (600 MHz,  $\text{CDCl}_3$ )**

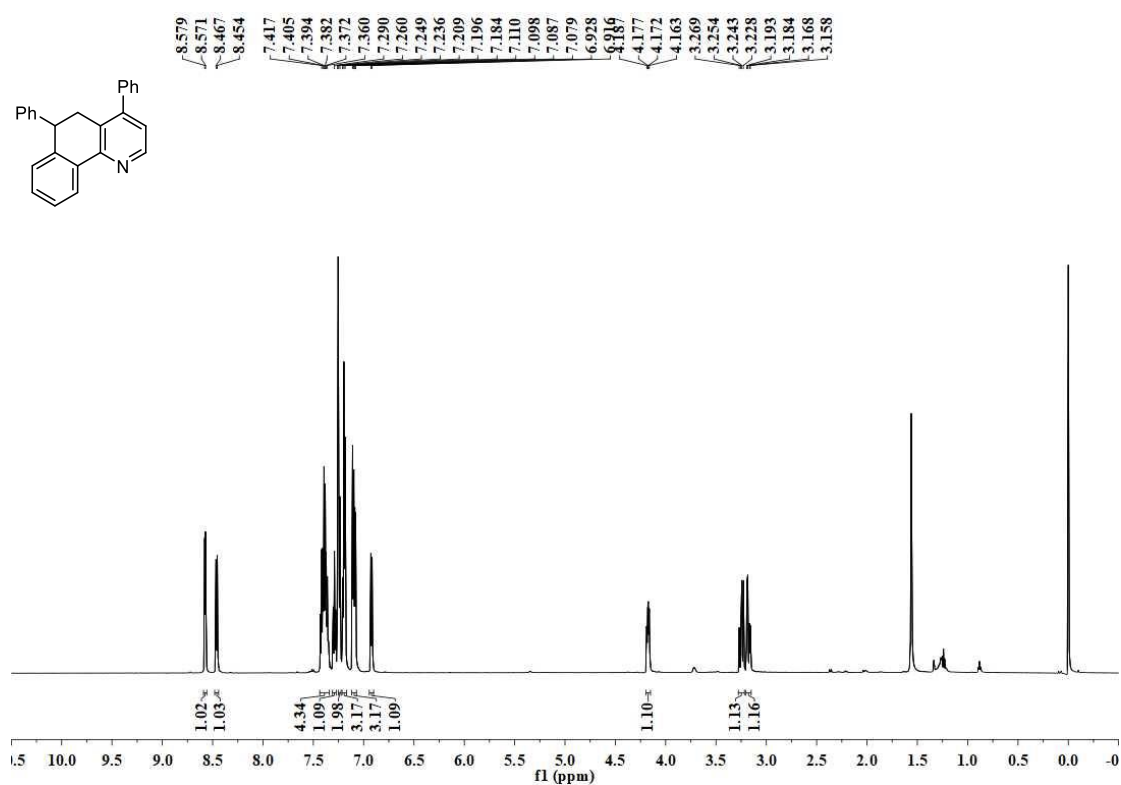

**$^{13}\text{C}$  NMR Spectrum of 24 (151 MHz,  $\text{CDCl}_3$ )**

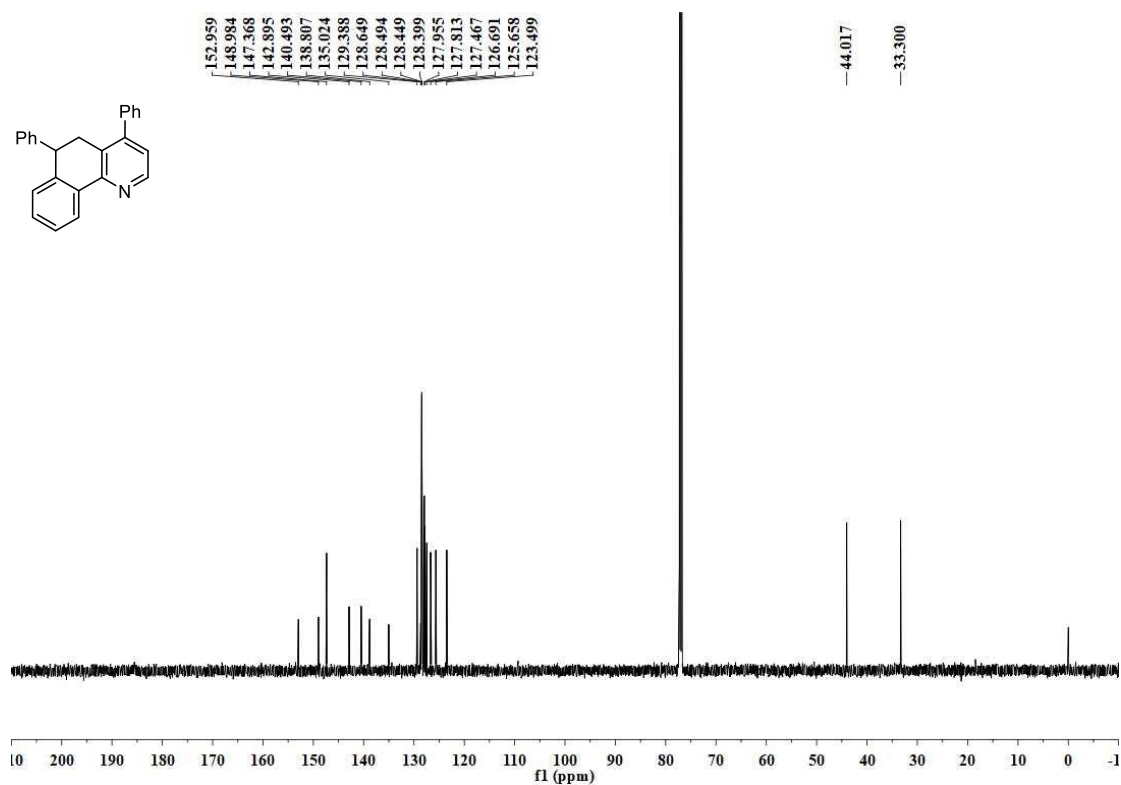

**$^1\text{H}$  NMR Spectrum of 25 (600 MHz,  $\text{CDCl}_3$ )**

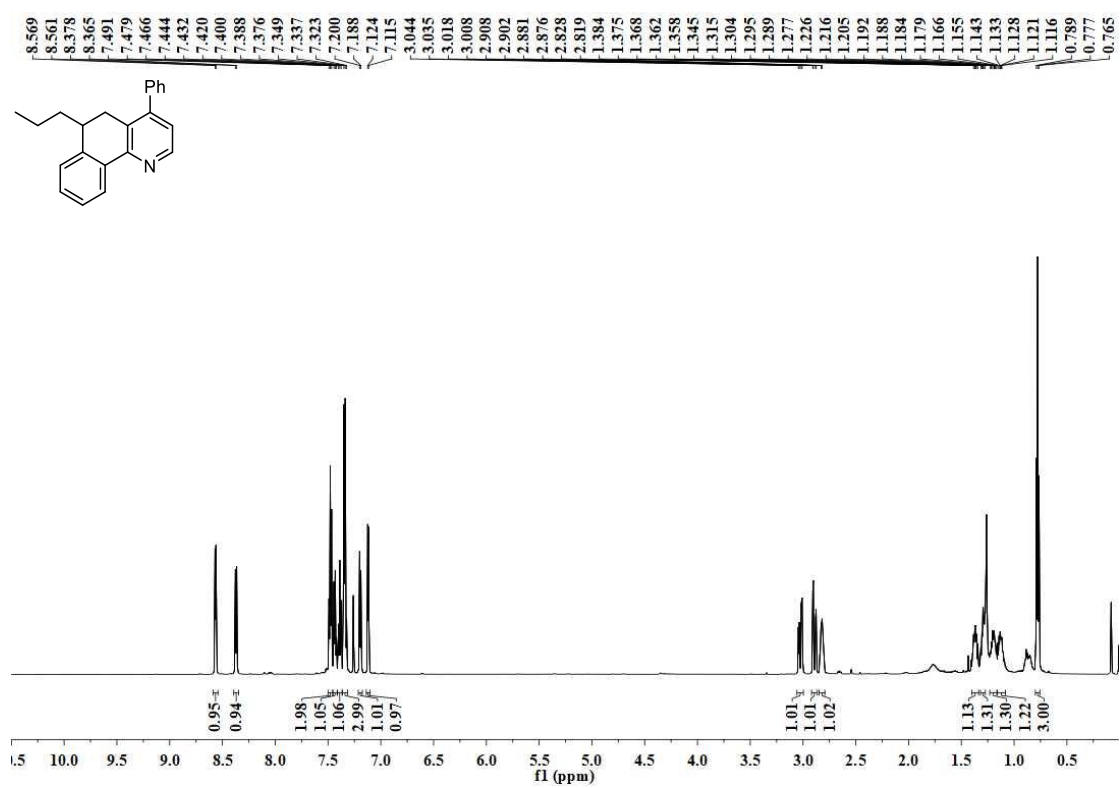

**$^{13}\text{C}$  NMR Spectrum of 25 (151 MHz,  $\text{CDCl}_3$ )**

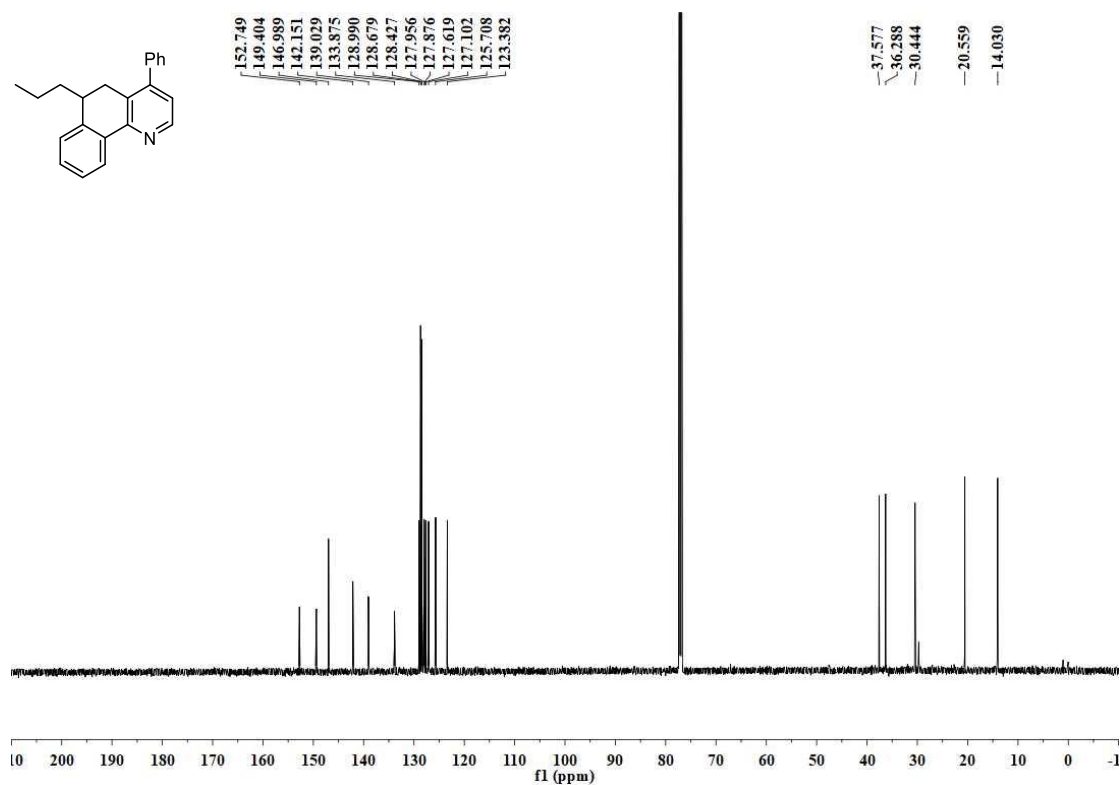

**$^1\text{H}$  NMR Spectrum of 26 (600 MHz,  $\text{CDCl}_3$ )**

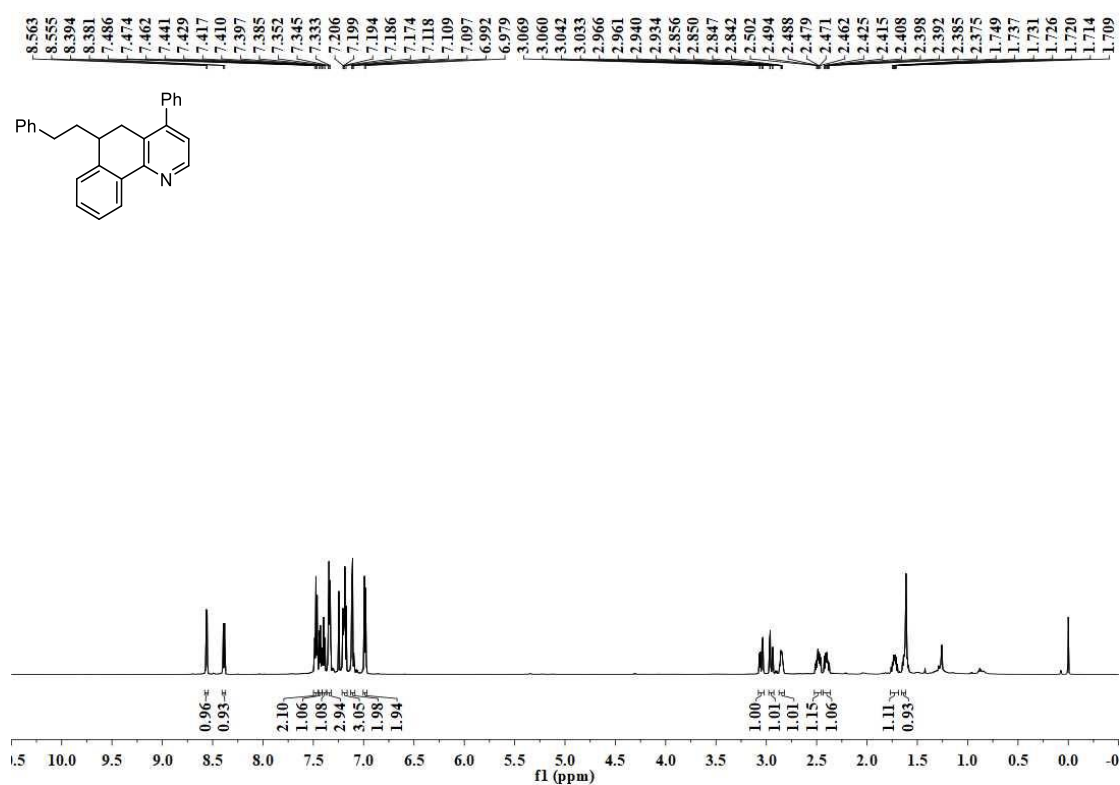



**$^{13}\text{C}$  NMR Spectrum of 26 (151 MHz,  $\text{CDCl}_3$ )**

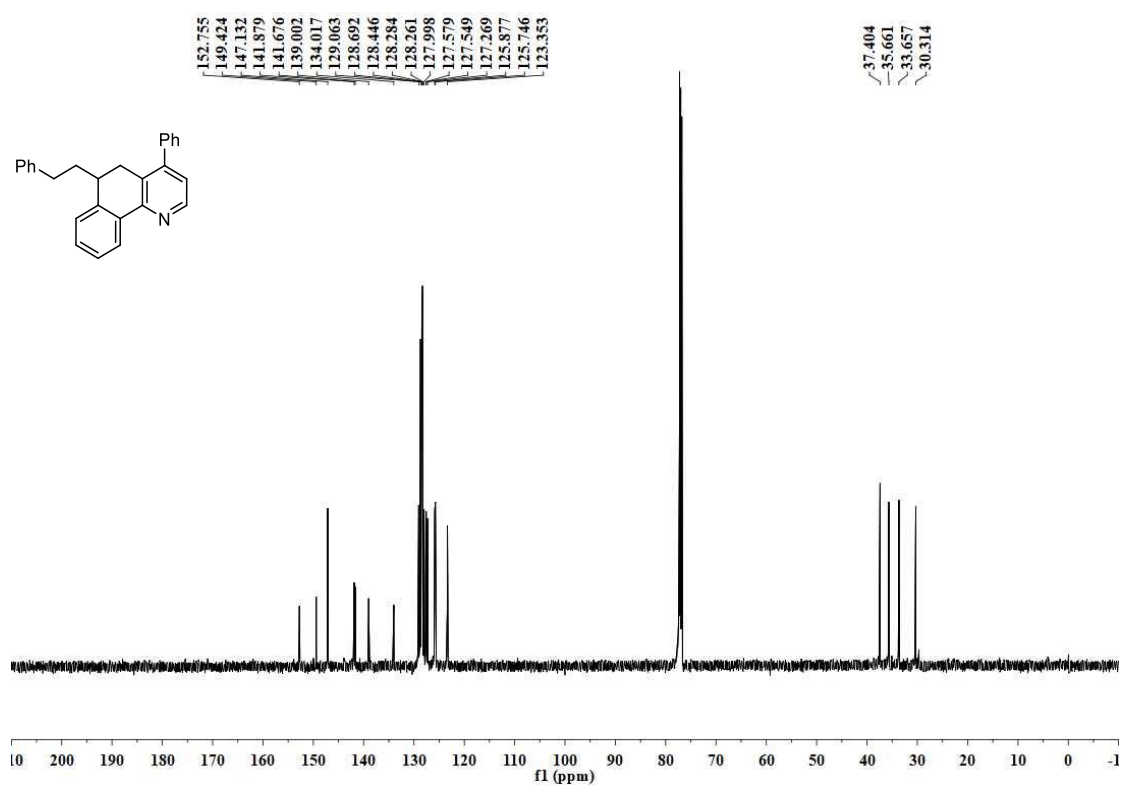

**$^1\text{H}$  NMR Spectrum of 27 (600 MHz,  $\text{CDCl}_3$ )**

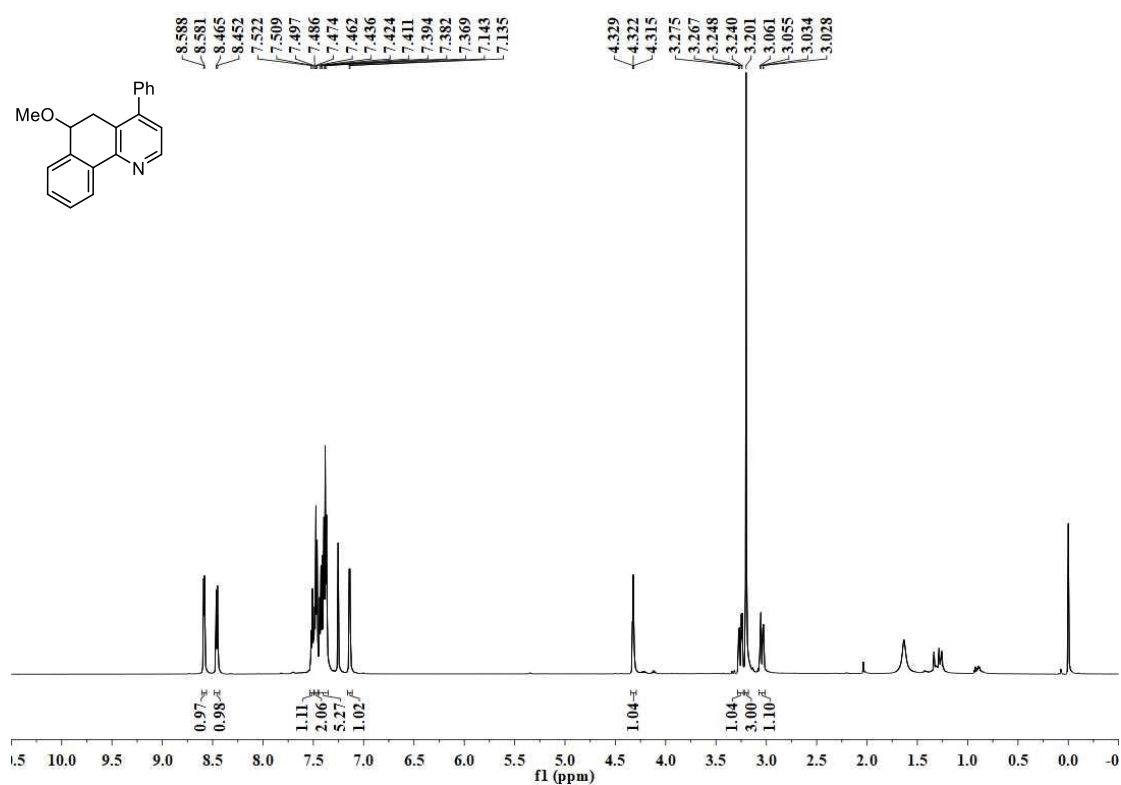

**$^{13}\text{C}$  NMR Spectrum of 27 (151 MHz,  $\text{CDCl}_3$ )**

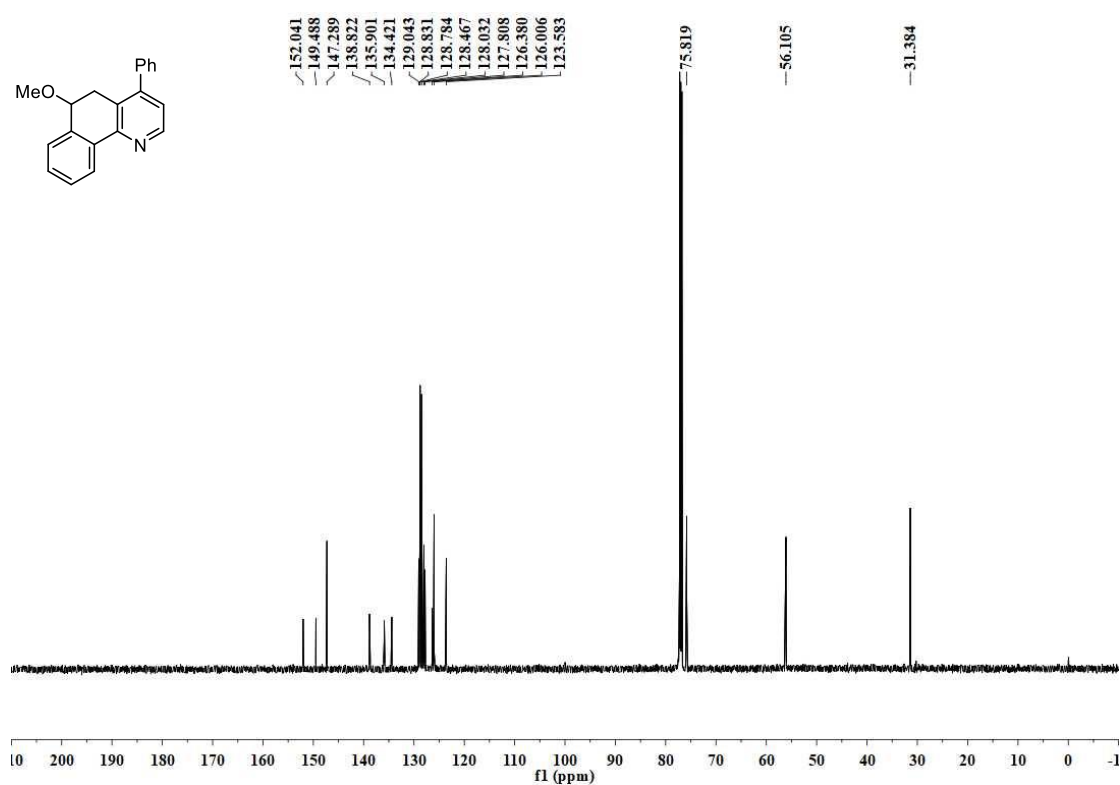

**$^1\text{H}$  NMR Spectrum of 28 (600 MHz,  $\text{CDCl}_3$ )**

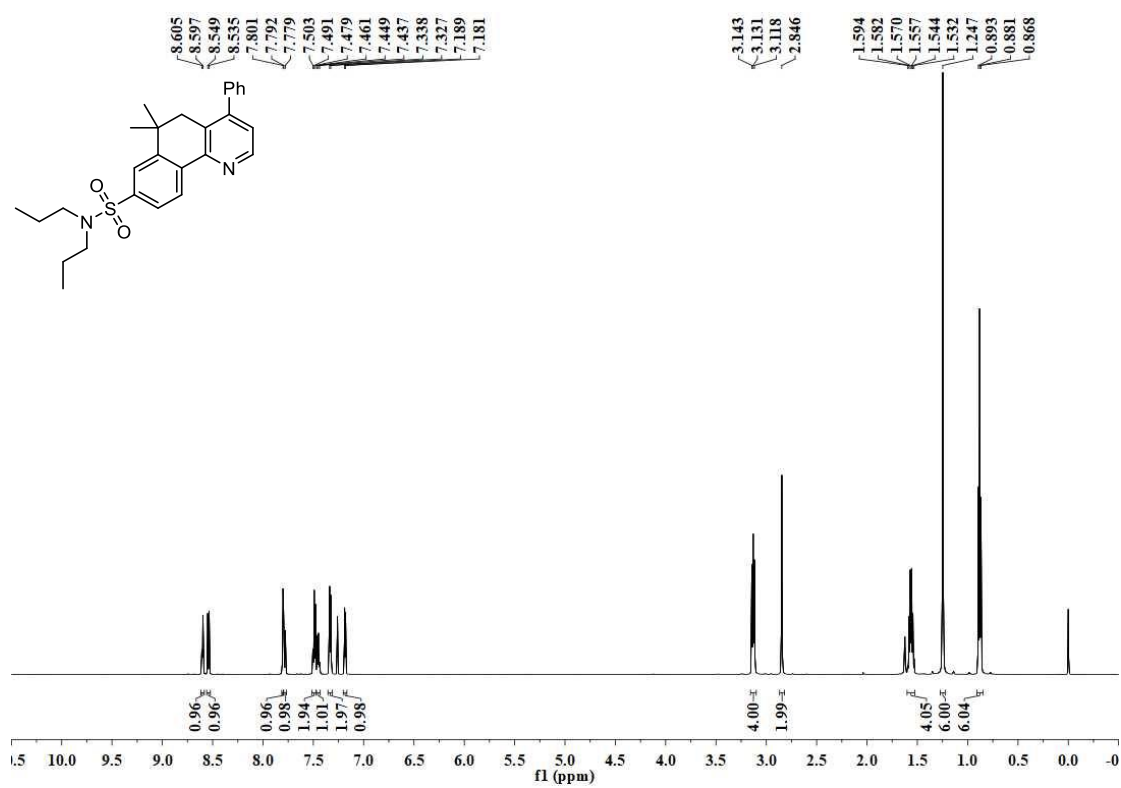

**$^{13}\text{C}$  NMR Spectrum of 28 (151 MHz,  $\text{CDCl}_3$ )**

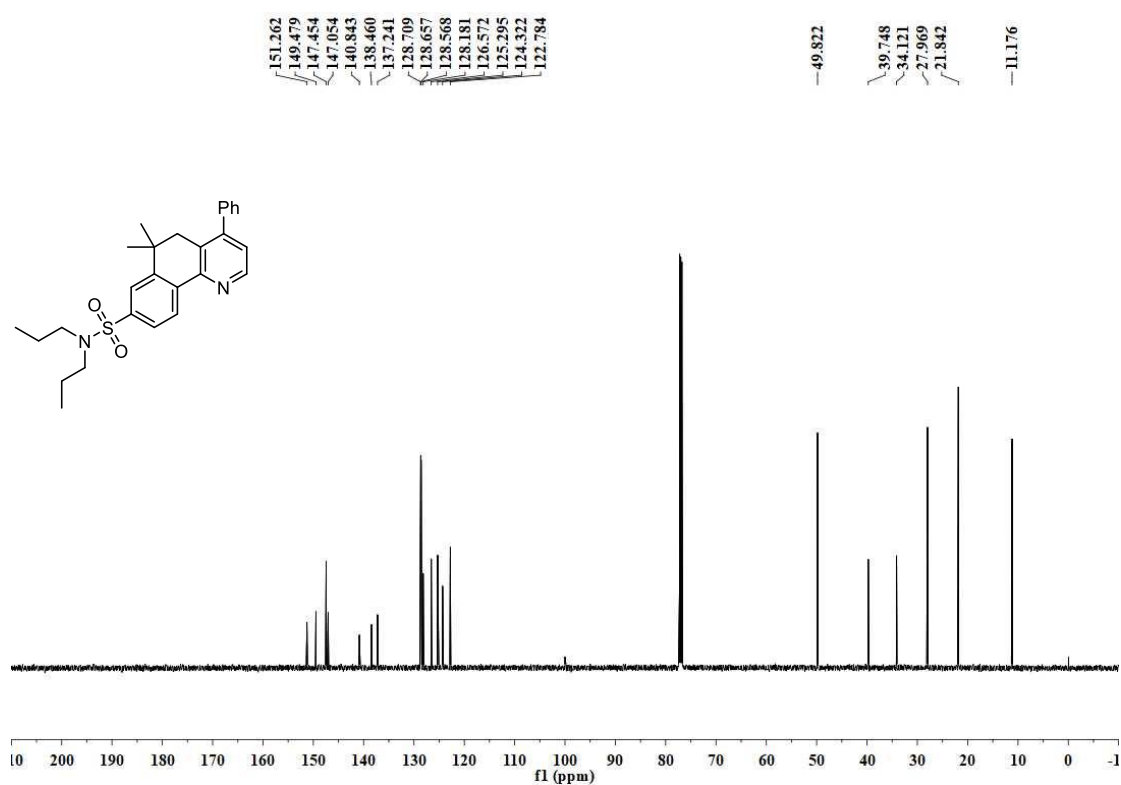

**$^1\text{H}$  NMR Spectrum of 29 (600 MHz,  $\text{CDCl}_3$ )**

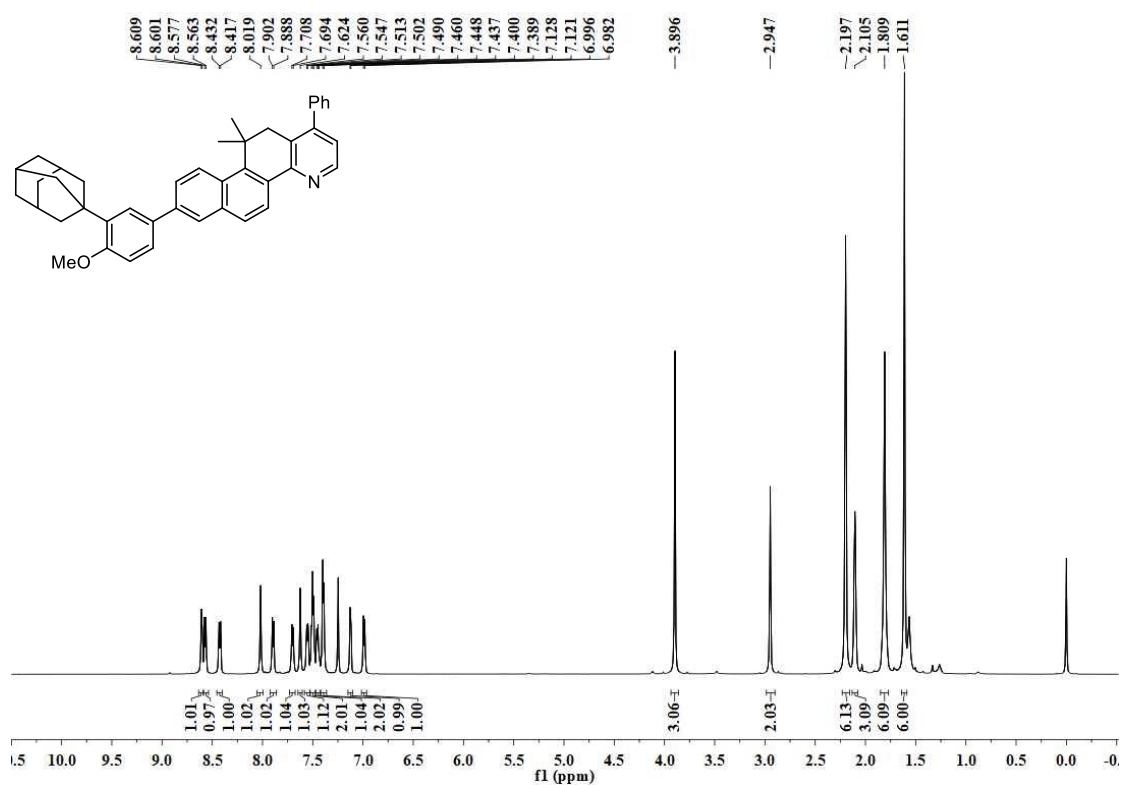

**$^{13}\text{C}$  NMR Spectrum of 29 (151 MHz,  $\text{CDCl}_3$ )**

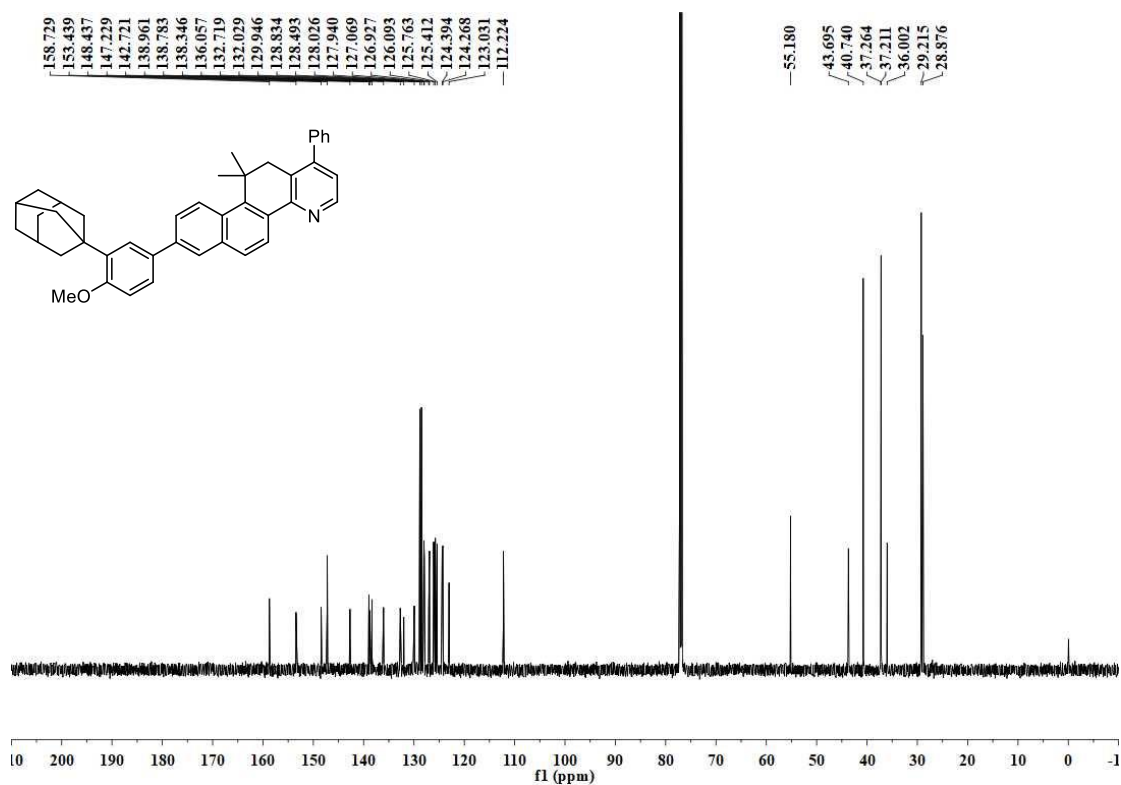

**$^1\text{H}$  NMR Spectrum of 30 (600 MHz,  $\text{CDCl}_3$ )**

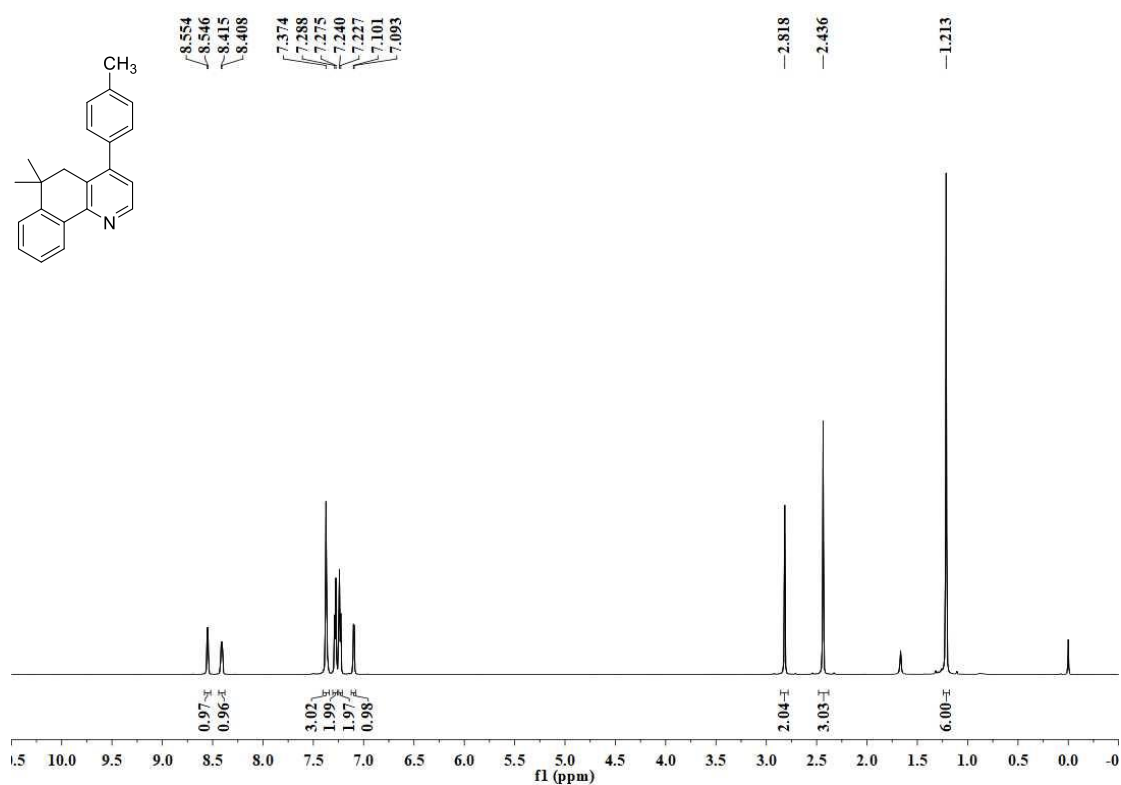

**$^{13}\text{C}$  NMR Spectrum of 30 (151 MHz,  $\text{CDCl}_3$ )**

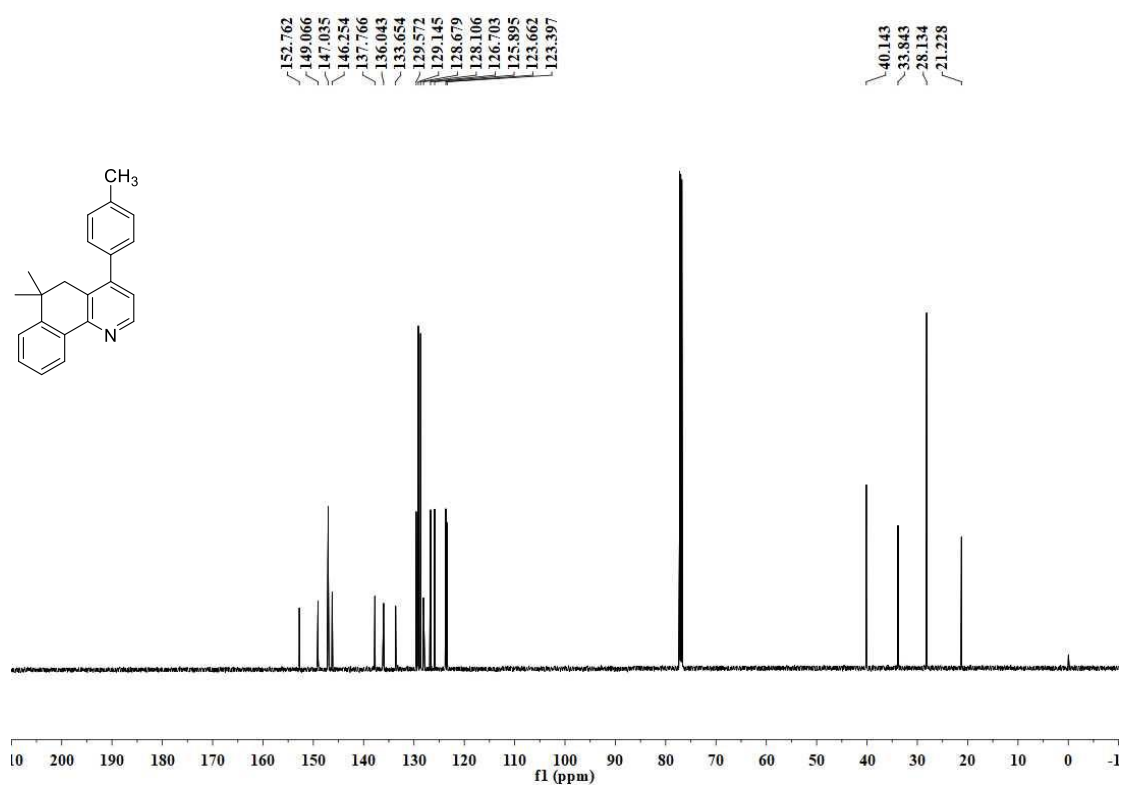

**$^1\text{H}$  NMR Spectrum of 31 (600 MHz,  $\text{CDCl}_3$ )**

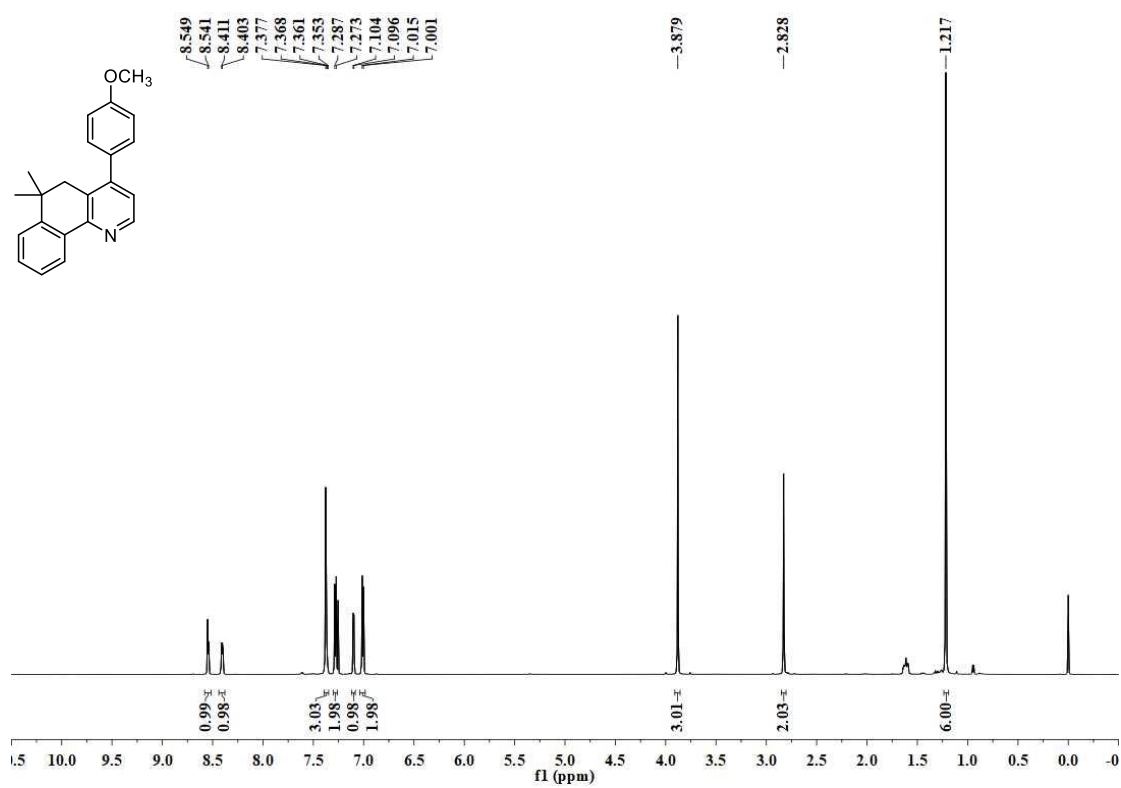

**$^{13}\text{C}$  NMR Spectrum of 31 (151 MHz,  $\text{CDCl}_3$ )**

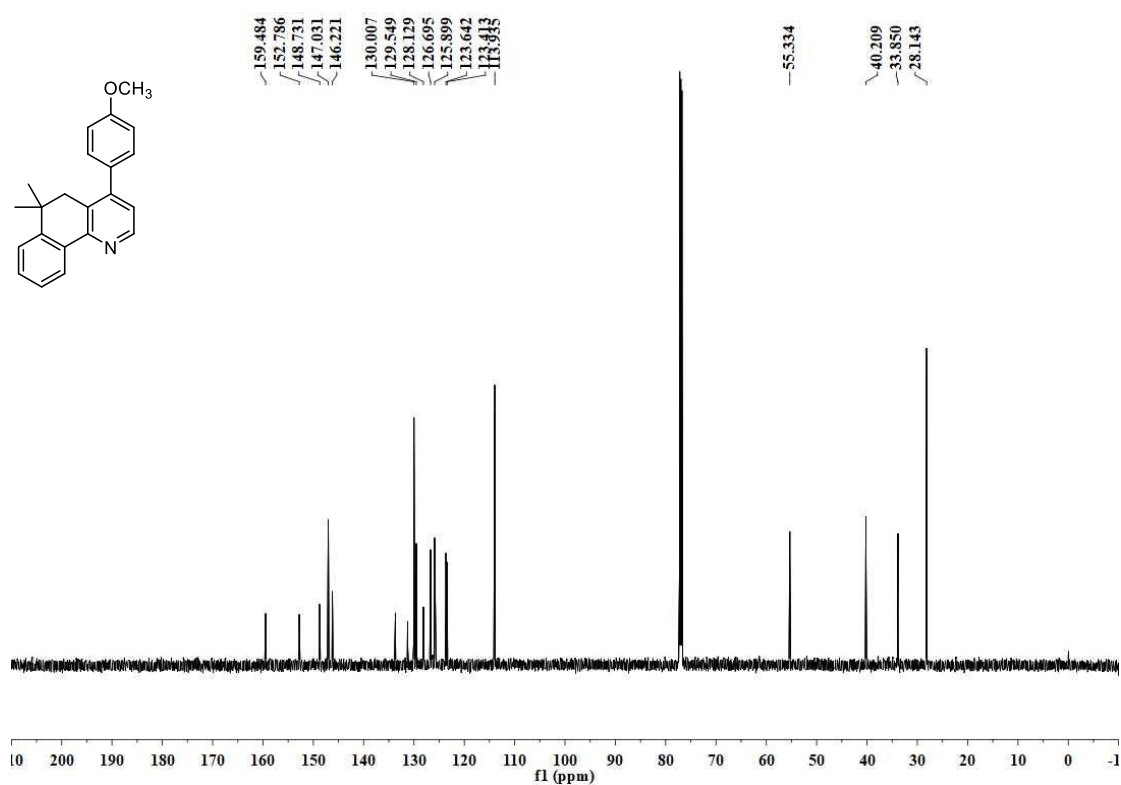

**$^1\text{H}$  NMR Spectrum of 32 (600 MHz,  $\text{CDCl}_3$ )**

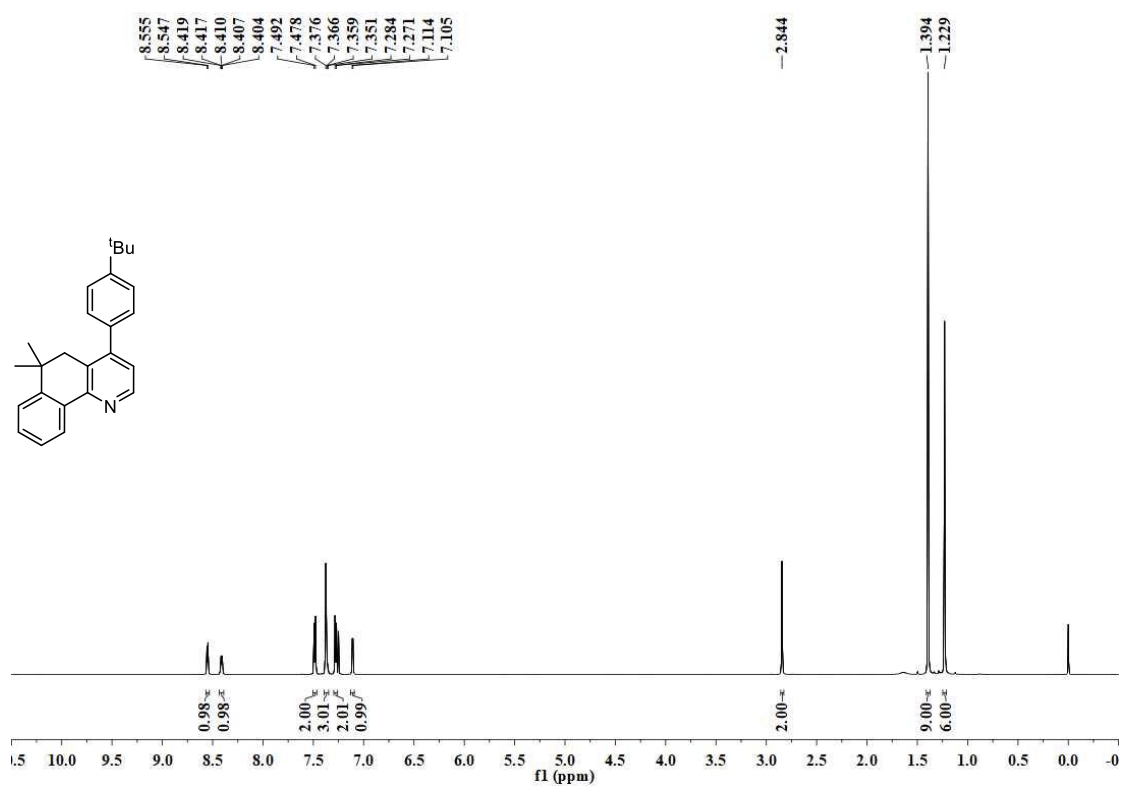

**$^{13}\text{C}$  NMR Spectrum of 32 (151 MHz,  $\text{CDCl}_3$ )**

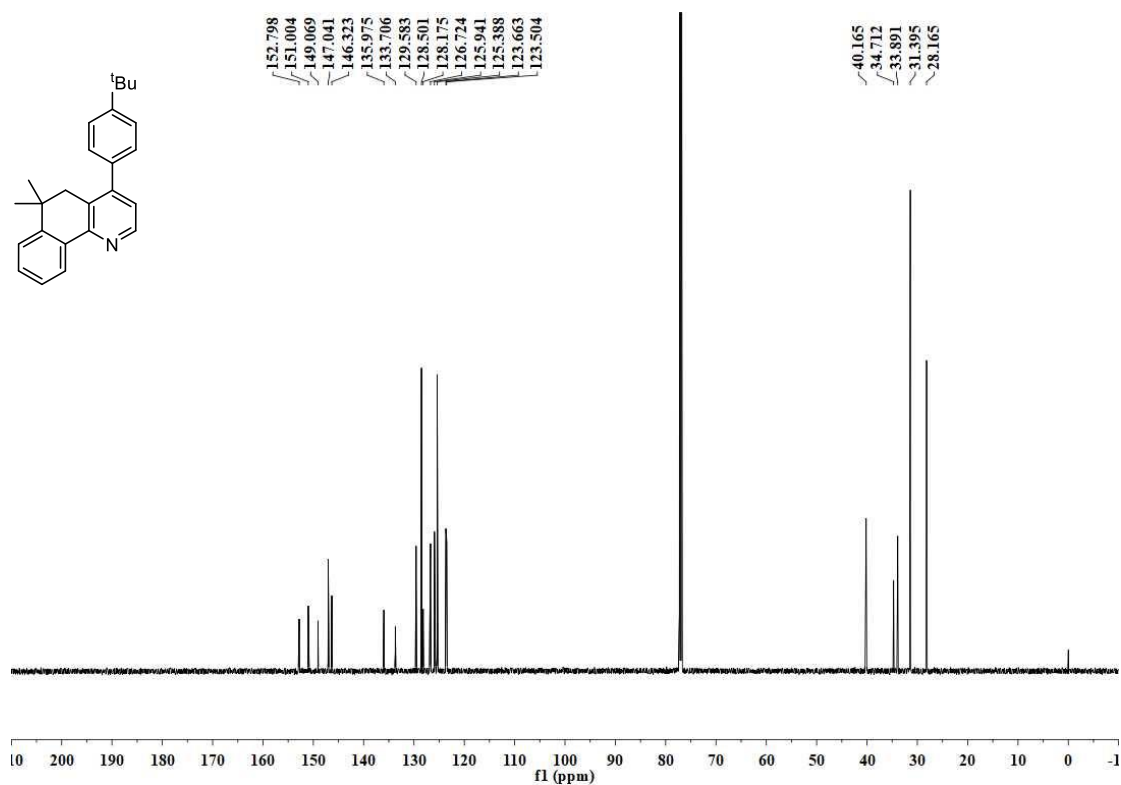

**$^1\text{H}$  NMR Spectrum of 33 (600 MHz,  $\text{CDCl}_3$ )**

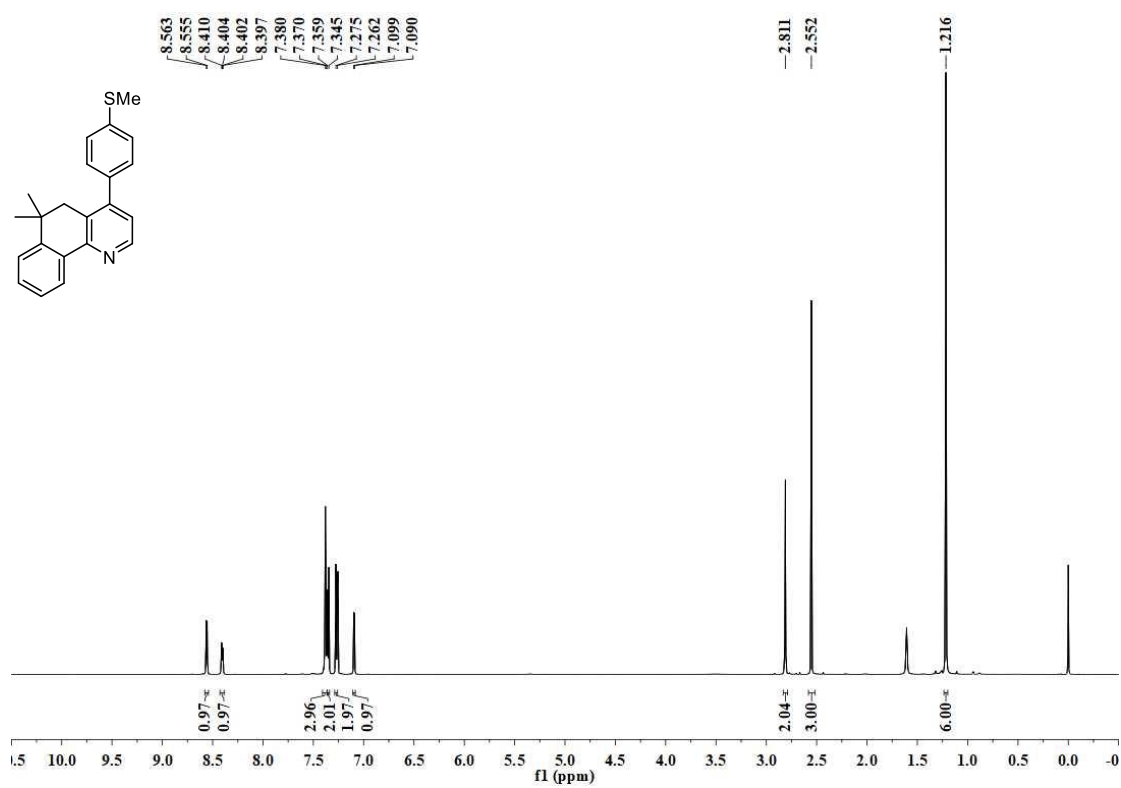

**<sup>13</sup>C NMR Spectrum of 33 (151 MHz, CDCl<sub>3</sub>)**

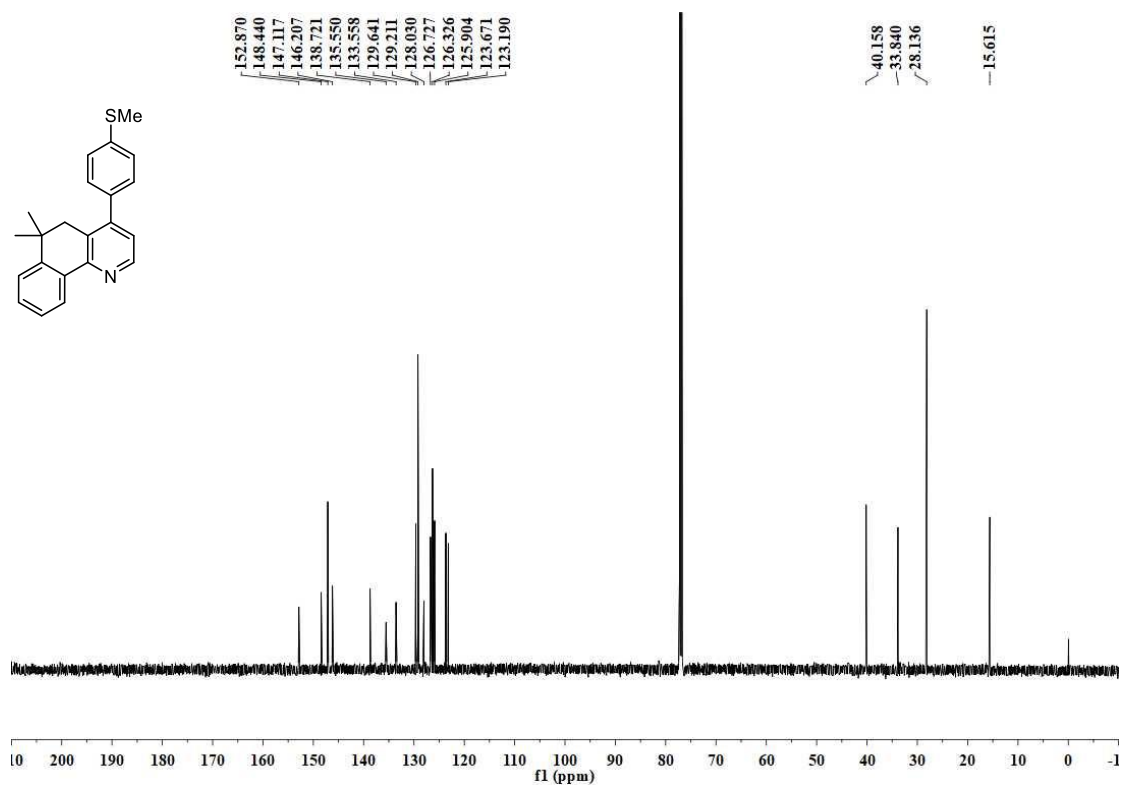

**<sup>1</sup>H NMR Spectrum of 34 (600 MHz, CDCl<sub>3</sub>)**

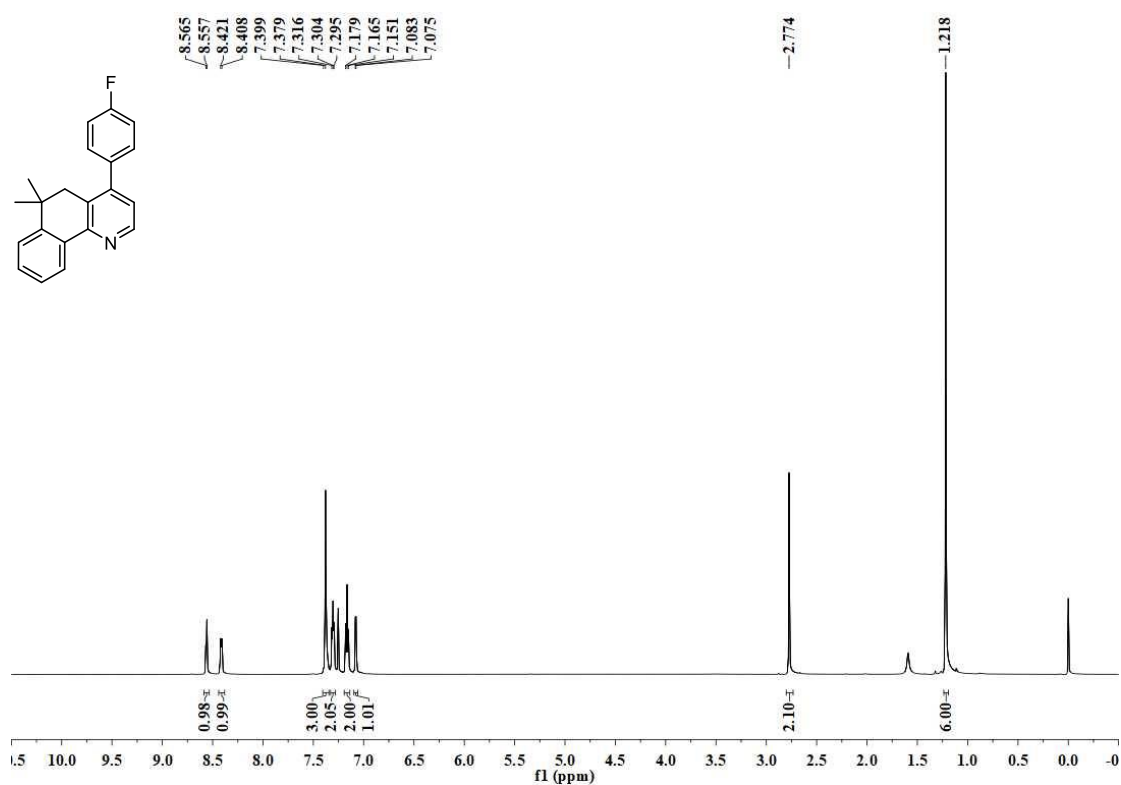



**$^{13}\text{C}$  NMR Spectrum of **34** (151 MHz,  $\text{CDCl}_3$ )**

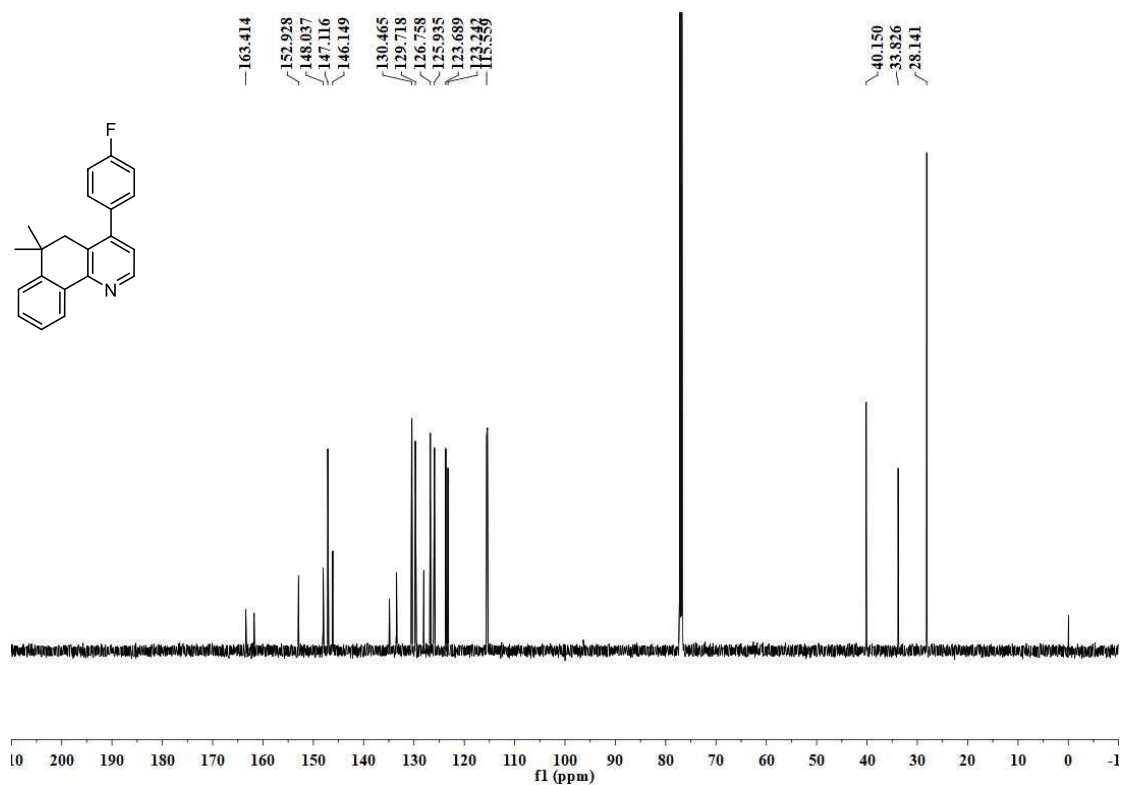

**$^{19}\text{F}$  NMR Spectrum of **34** (565 MHz,  $\text{CDCl}_3$ )**

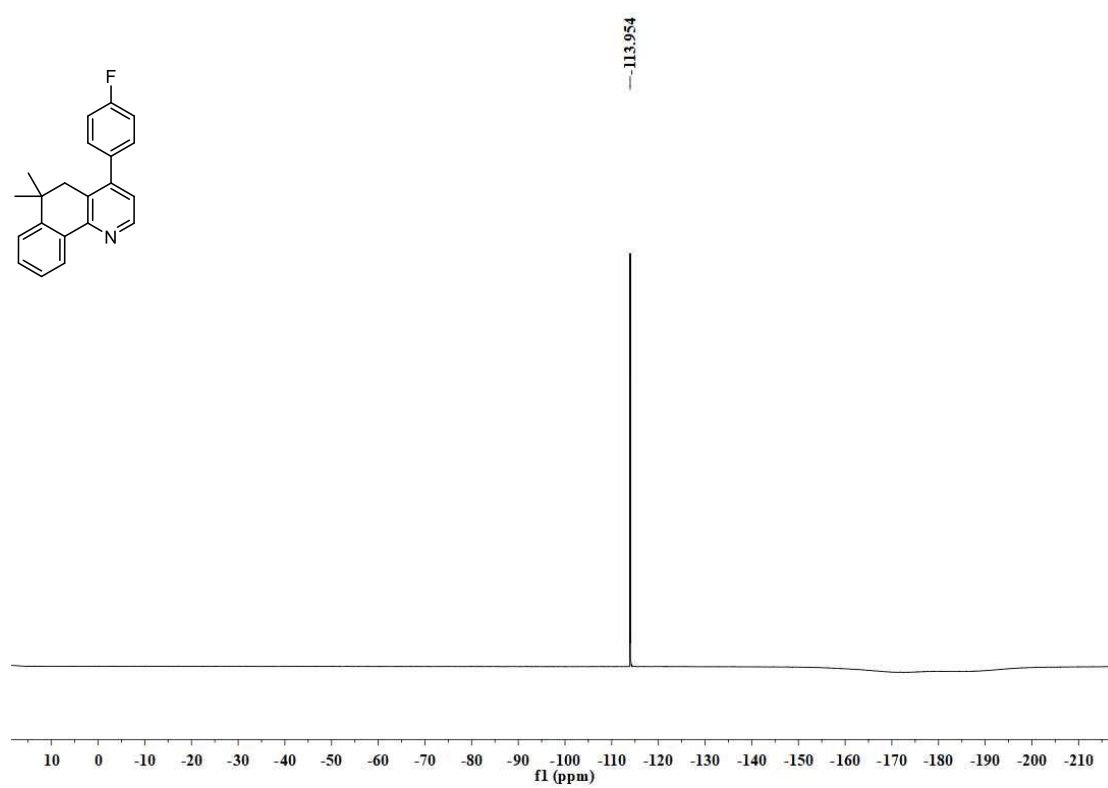

**<sup>1</sup>H NMR Spectrum of 35 (600 MHz, CDCl<sub>3</sub>)**

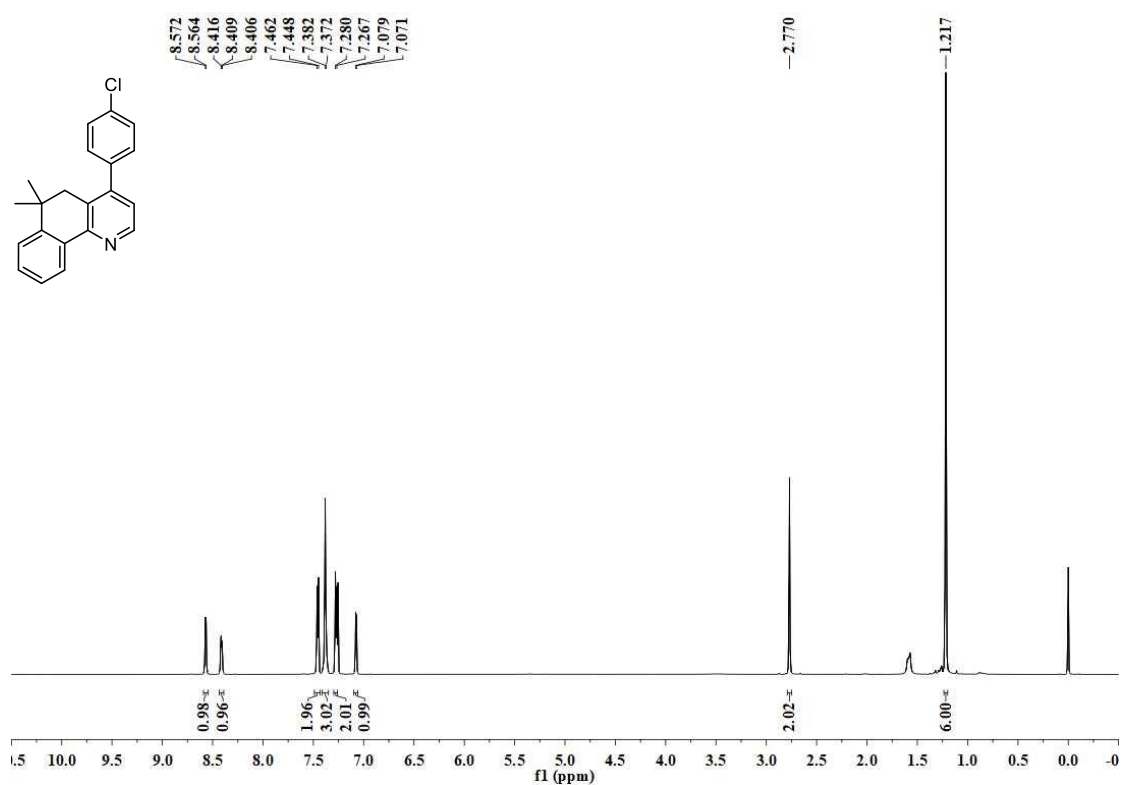

**<sup>13</sup>C NMR Spectrum of 35 (151 MHz, CDCl<sub>3</sub>)**

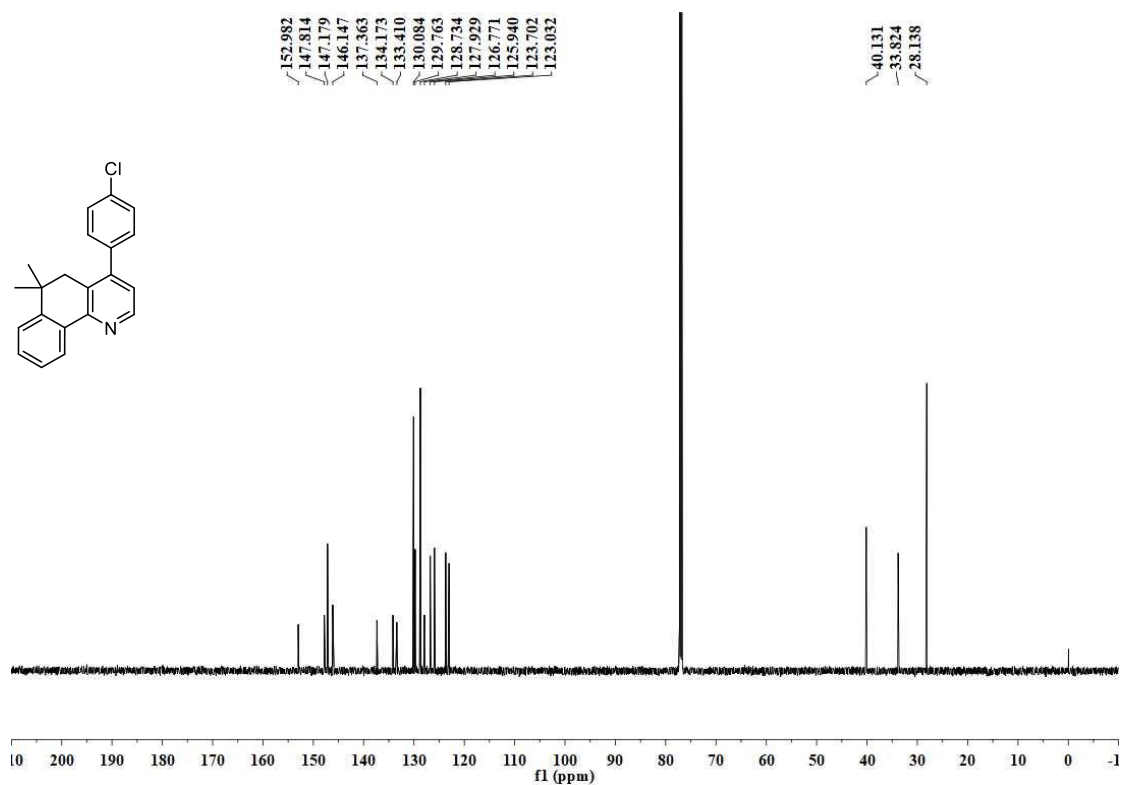

**<sup>1</sup>H NMR Spectrum of 36 (600 MHz, CDCl<sub>3</sub>)**

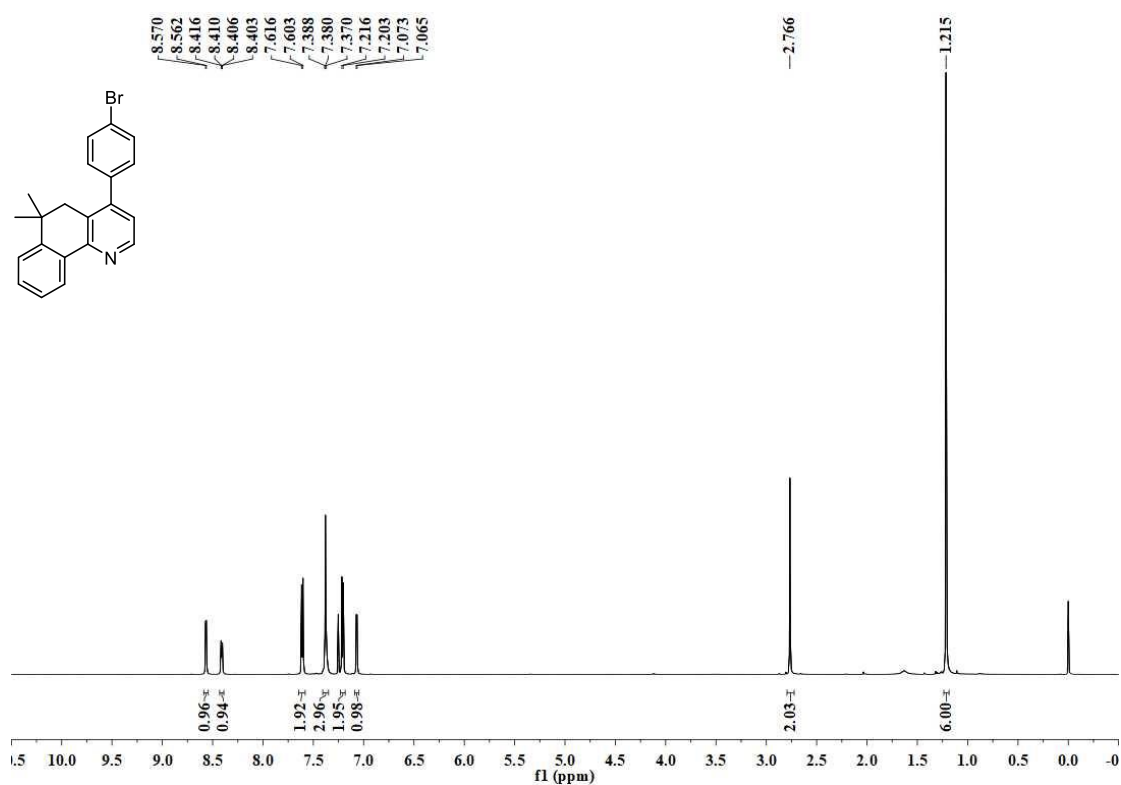

**<sup>13</sup>C NMR Spectrum of 36 (151 MHz, CDCl<sub>3</sub>)**

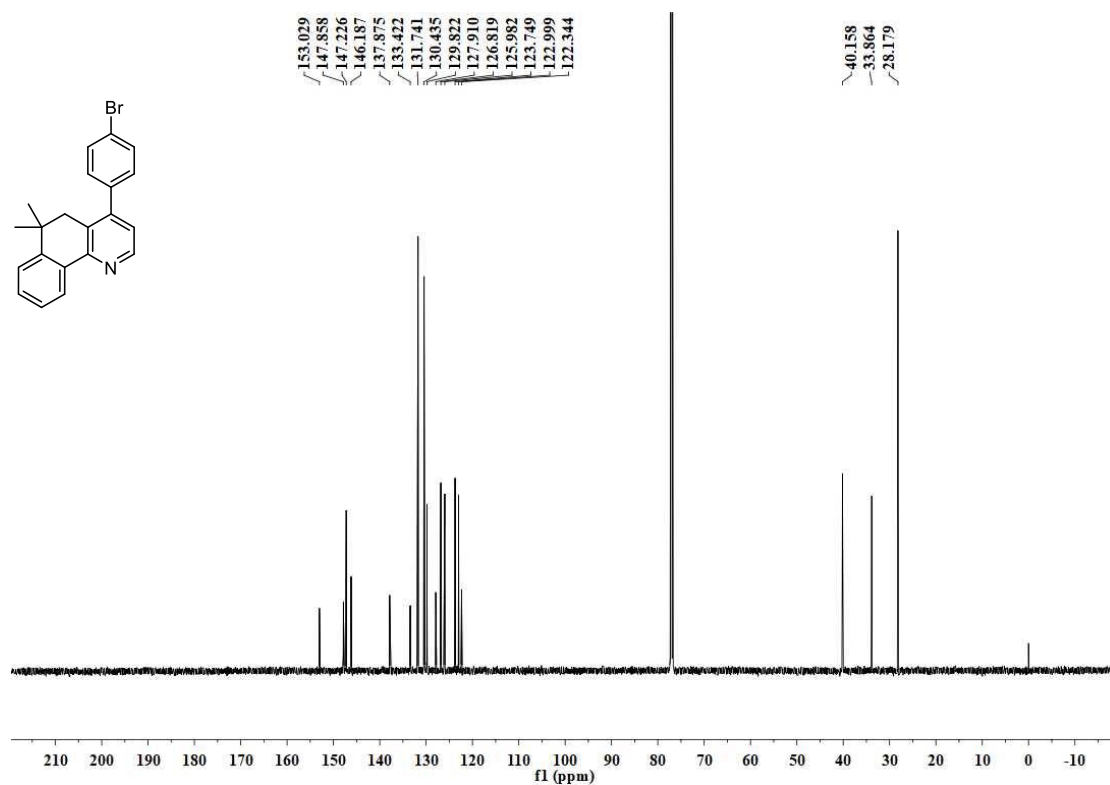

**<sup>1</sup>H NMR Spectrum of 37 (600 MHz, CDCl<sub>3</sub>)**

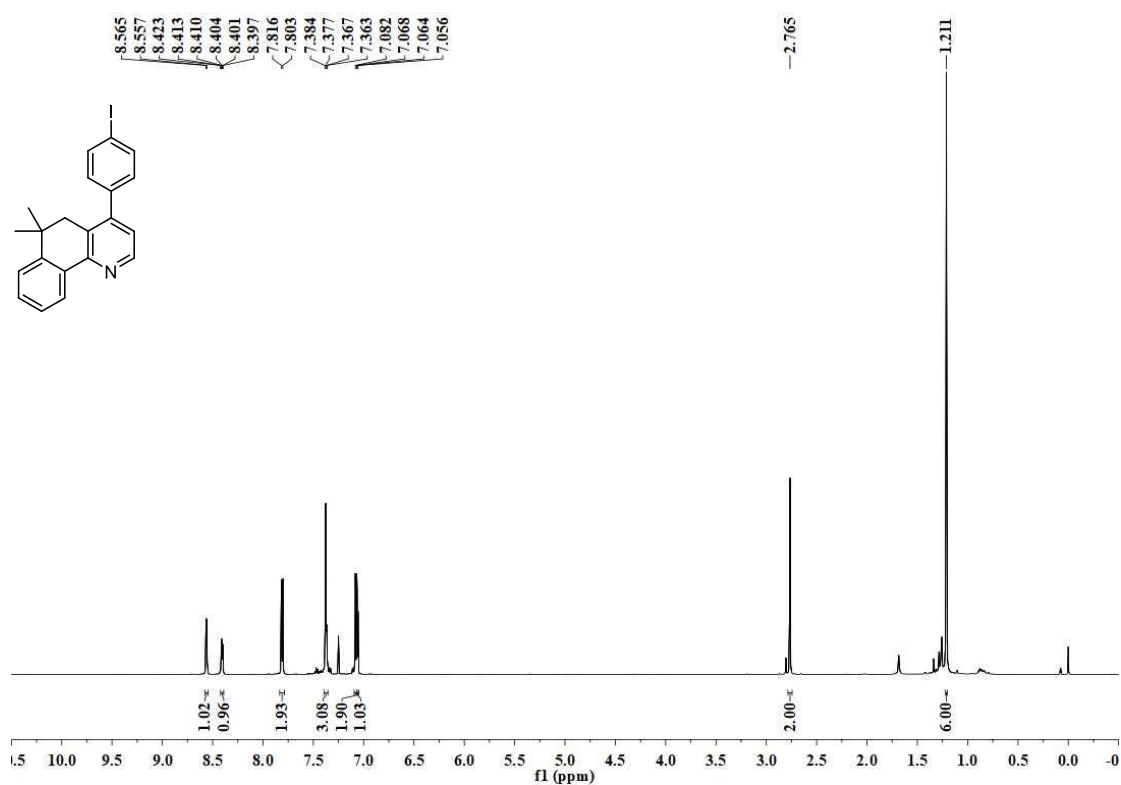

**<sup>13</sup>C NMR Spectrum of 37 (151 MHz, CDCl<sub>3</sub>)**

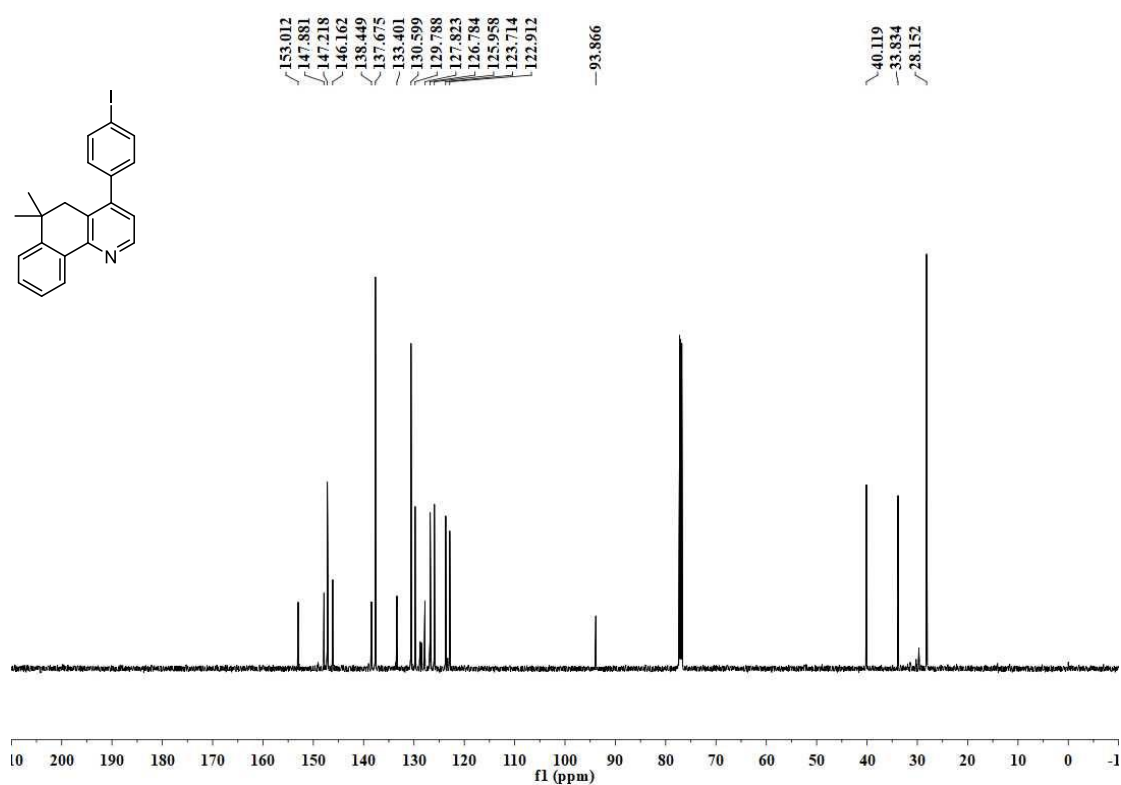

**<sup>1</sup>H NMR Spectrum of 38 (600 MHz, CDCl<sub>3</sub>)**

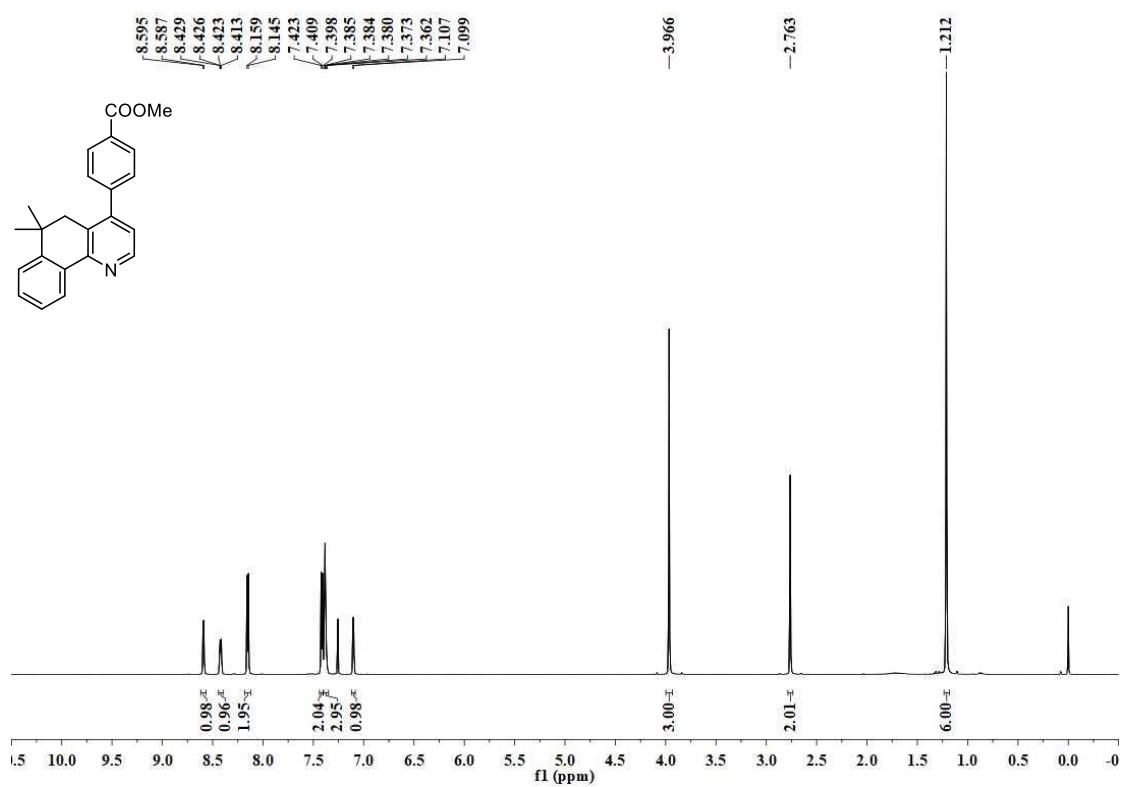

**<sup>13</sup>C NMR Spectrum of 38 (151 MHz, CDCl<sub>3</sub>)**

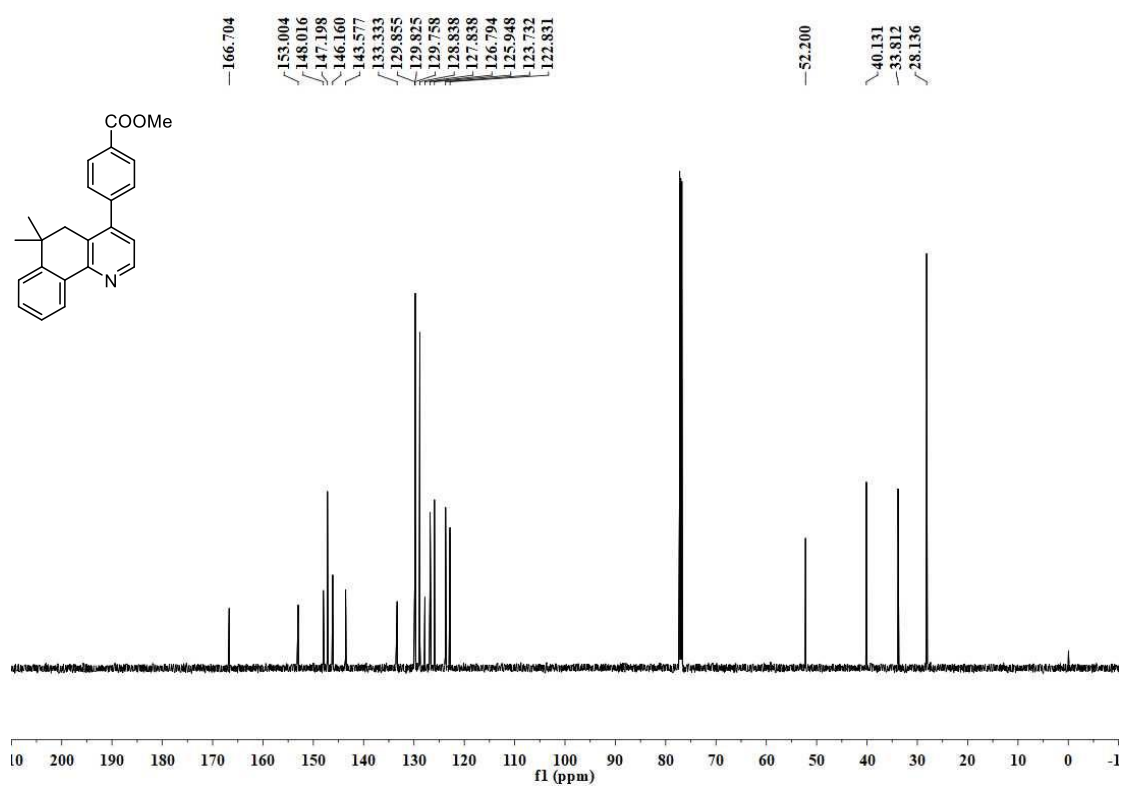

**<sup>1</sup>H NMR Spectrum of 39 (600 MHz, CDCl<sub>3</sub>)**

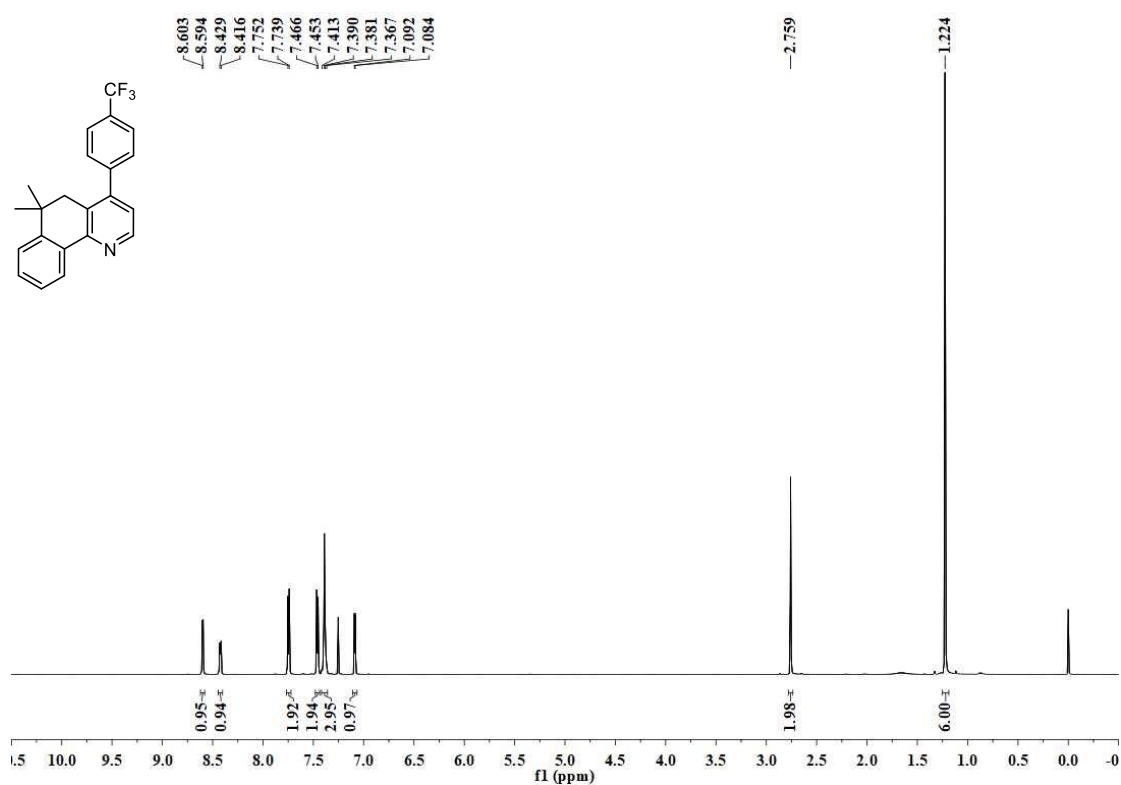

**<sup>13</sup>C NMR Spectrum of 39 (151 MHz, CDCl<sub>3</sub>)**

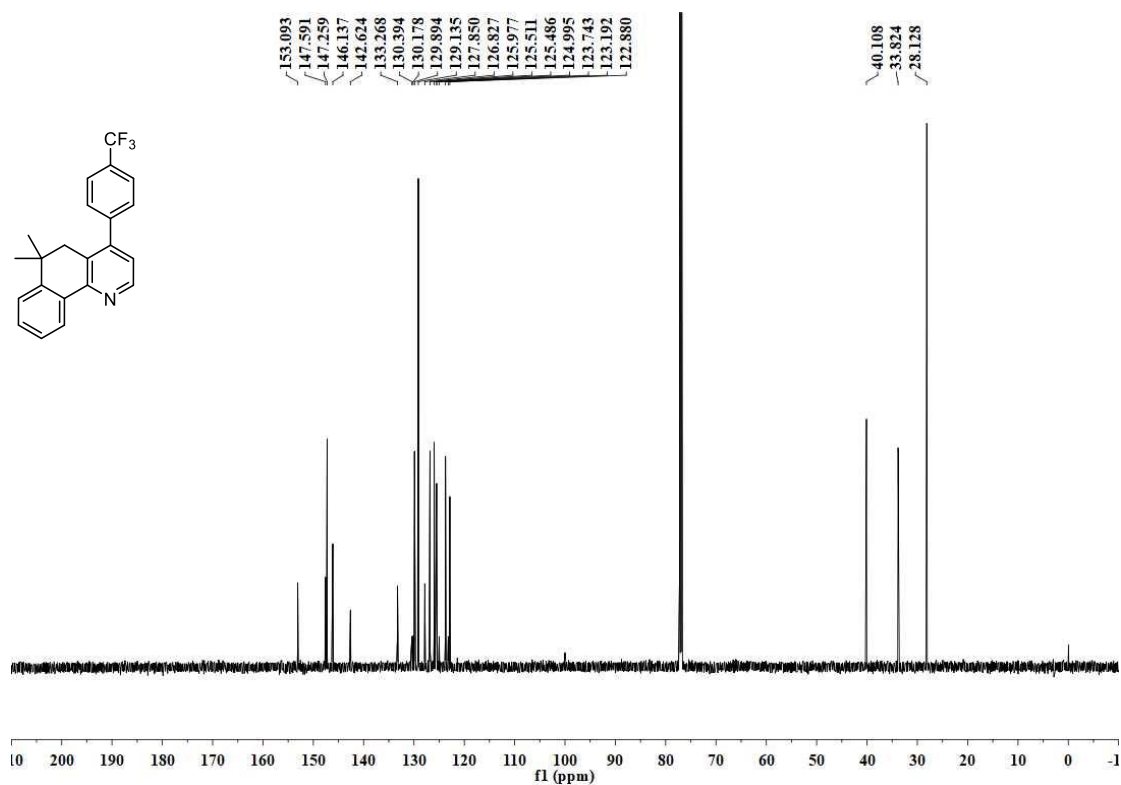

**<sup>19</sup>F NMR Spectrum of 39** (565 MHz, CDCl<sub>3</sub>)

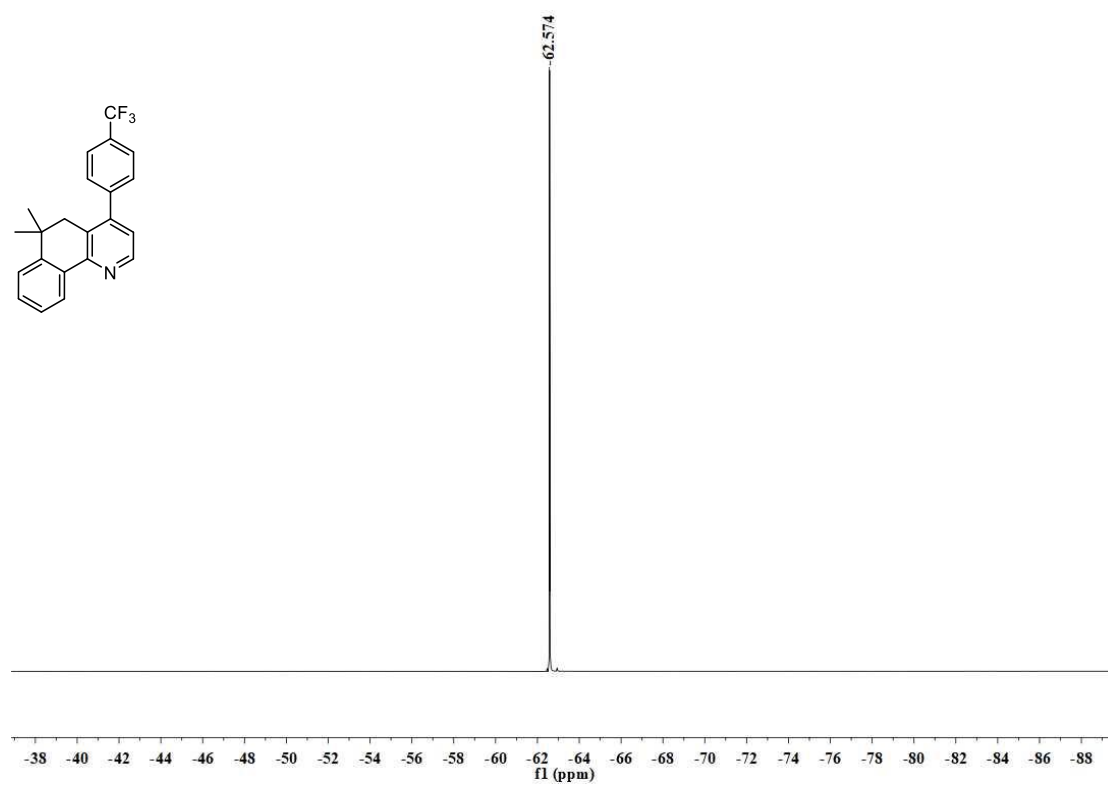

**<sup>1</sup>H NMR Spectrum of 40** (600 MHz, CDCl<sub>3</sub>)

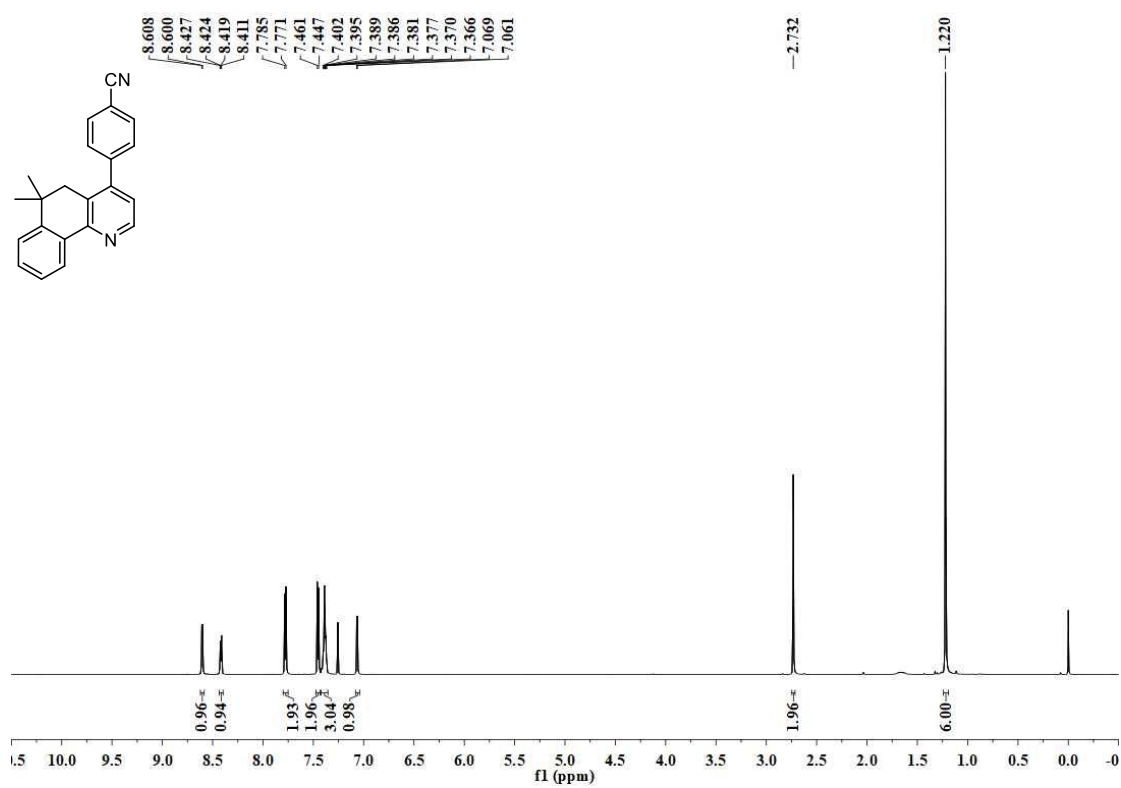

**$^{13}\text{C}$  NMR Spectrum of 40 (151 MHz,  $\text{CDCl}_3$ )**

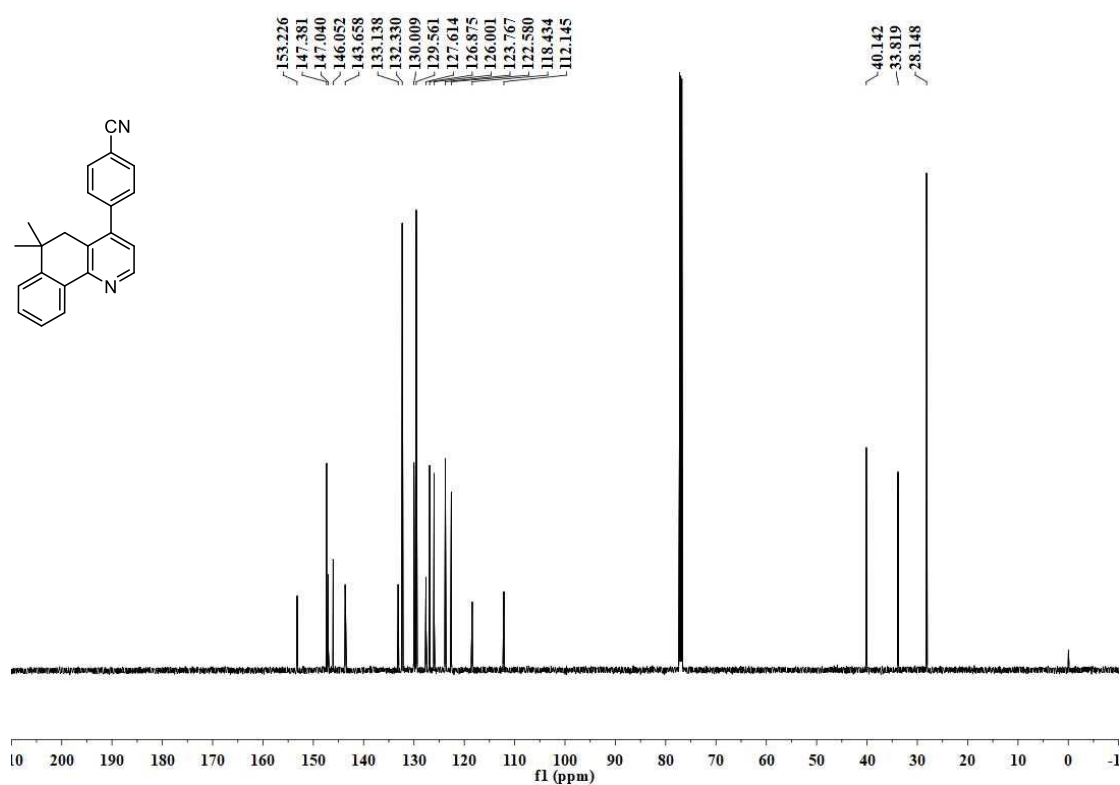

**$^1\text{H}$  NMR Spectrum of 41 (600 MHz,  $\text{CDCl}_3$ )**

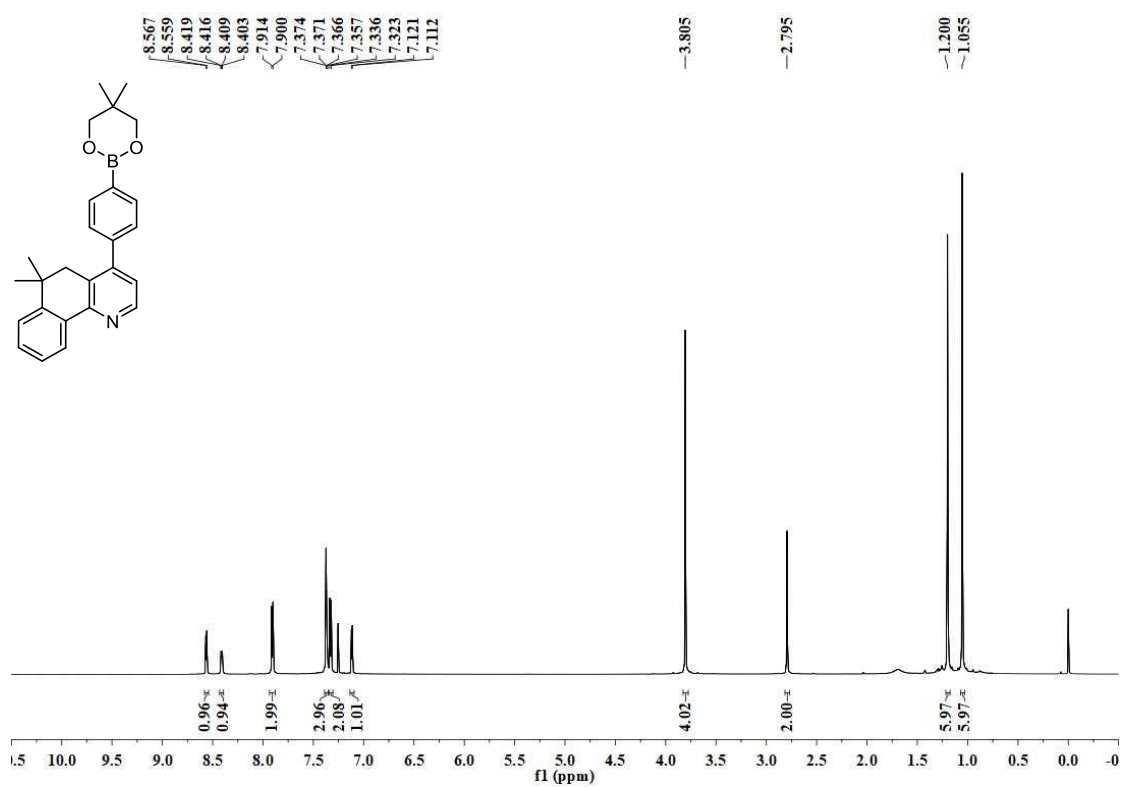



**$^{13}\text{C}$  NMR Spectrum of 41 (151 MHz,  $\text{CDCl}_3$ )**

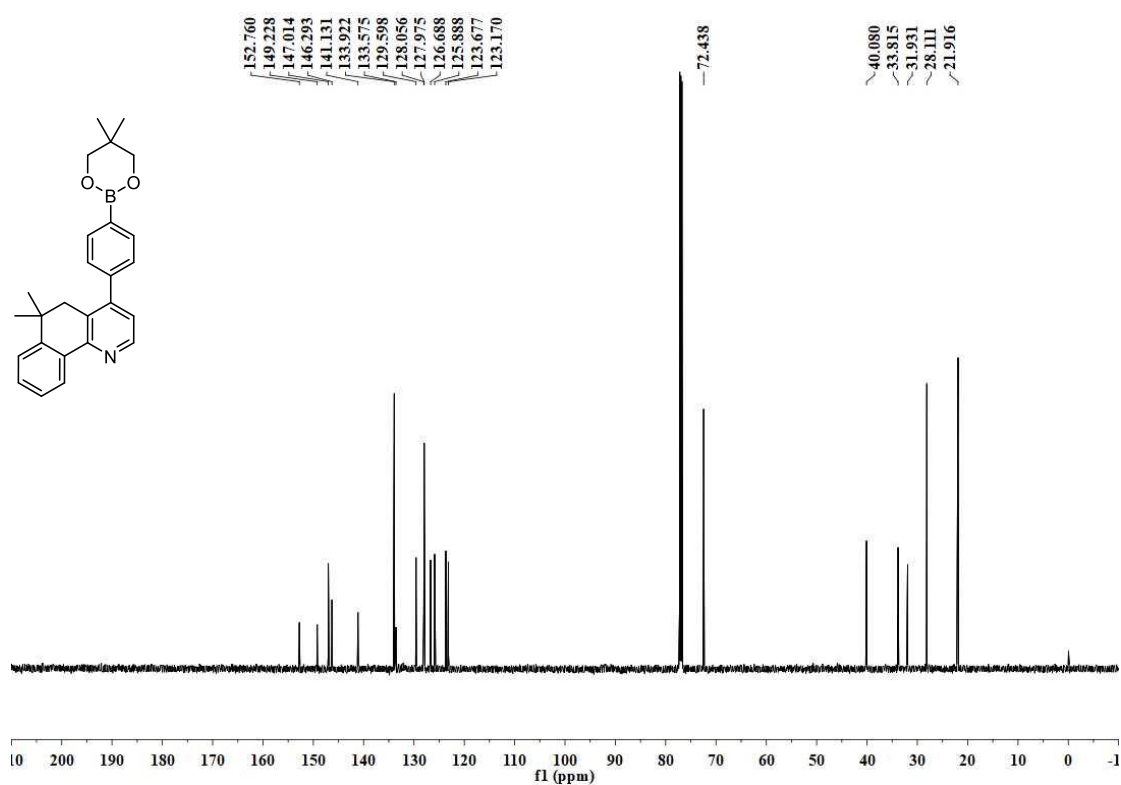

**$^1\text{H}$  NMR Spectrum of 42 (600 MHz,  $\text{CDCl}_3$ )**

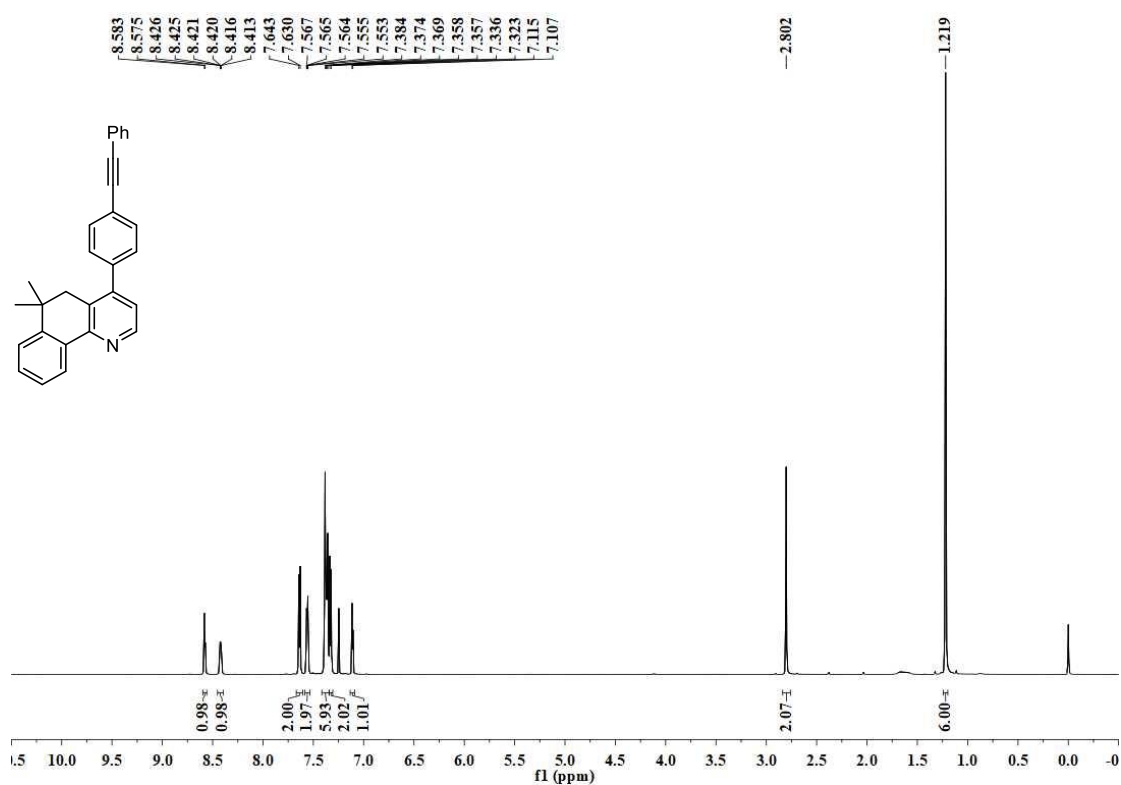

**<sup>13</sup>C NMR Spectrum of 42 (151 MHz, CDCl<sub>3</sub>)**

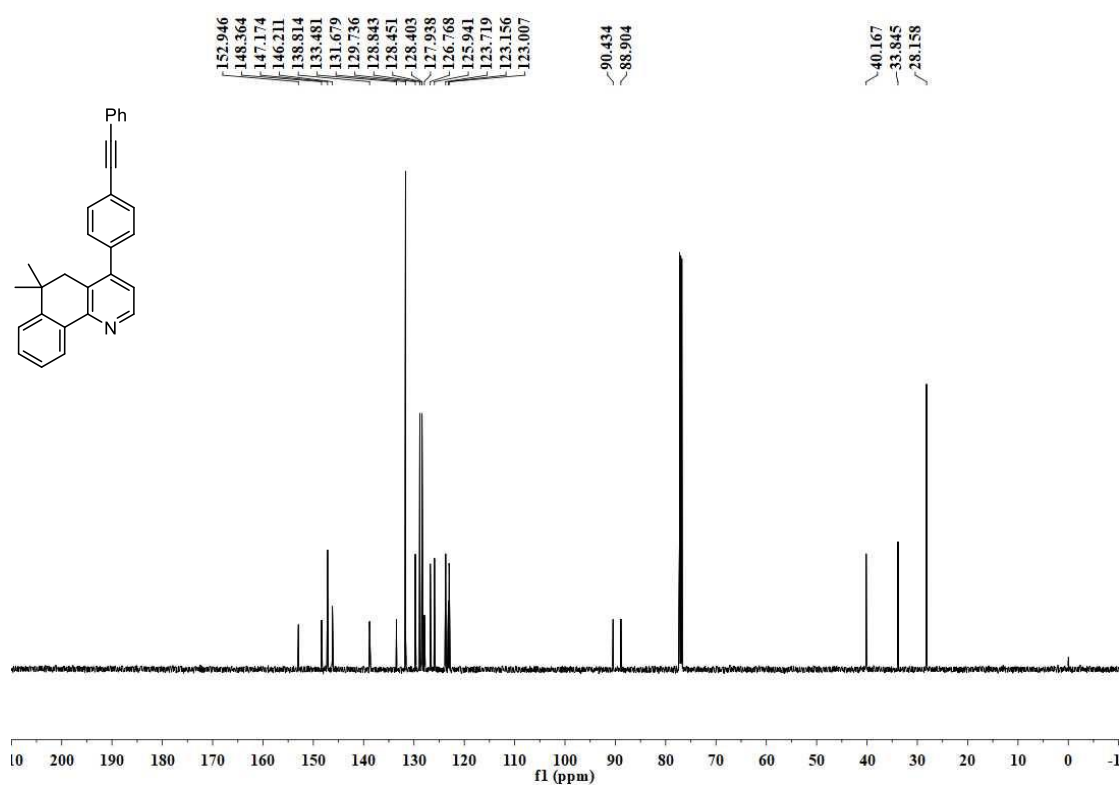

**<sup>1</sup>H NMR Spectrum of 43 (600 MHz, CDCl<sub>3</sub>)**

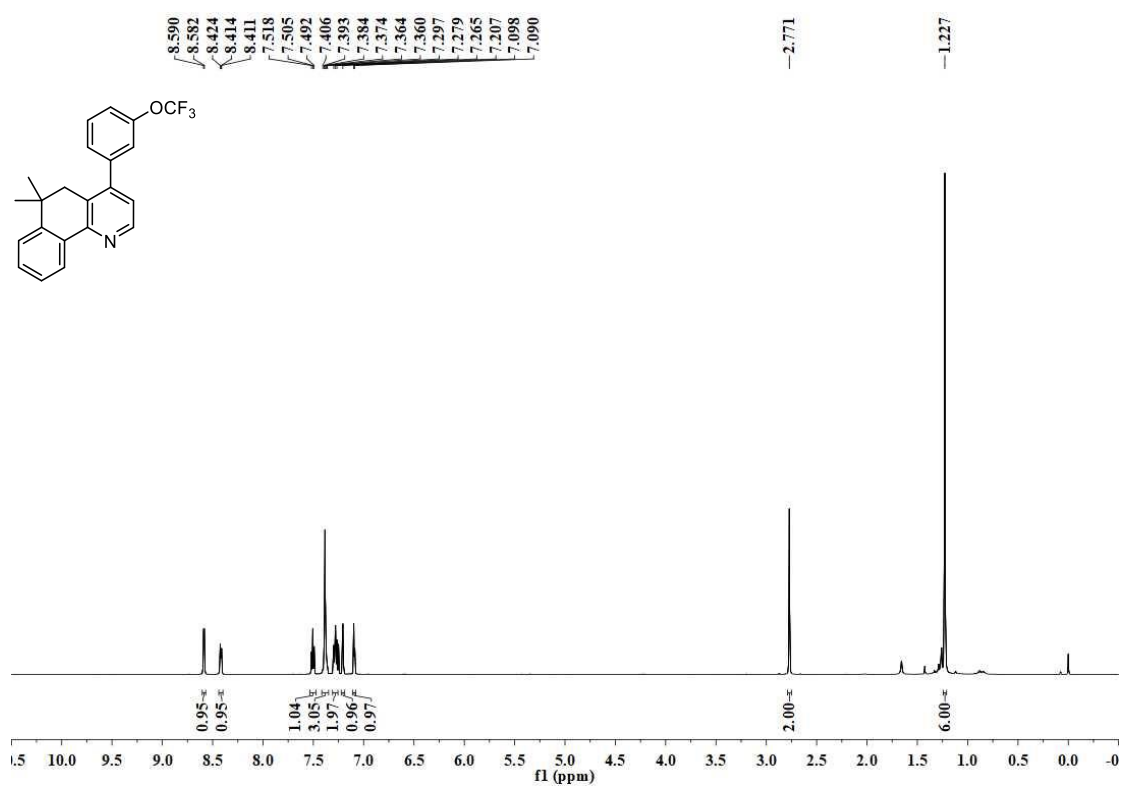

**<sup>13</sup>C NMR Spectrum of 43 (151 MHz, CDCl<sub>3</sub>)**

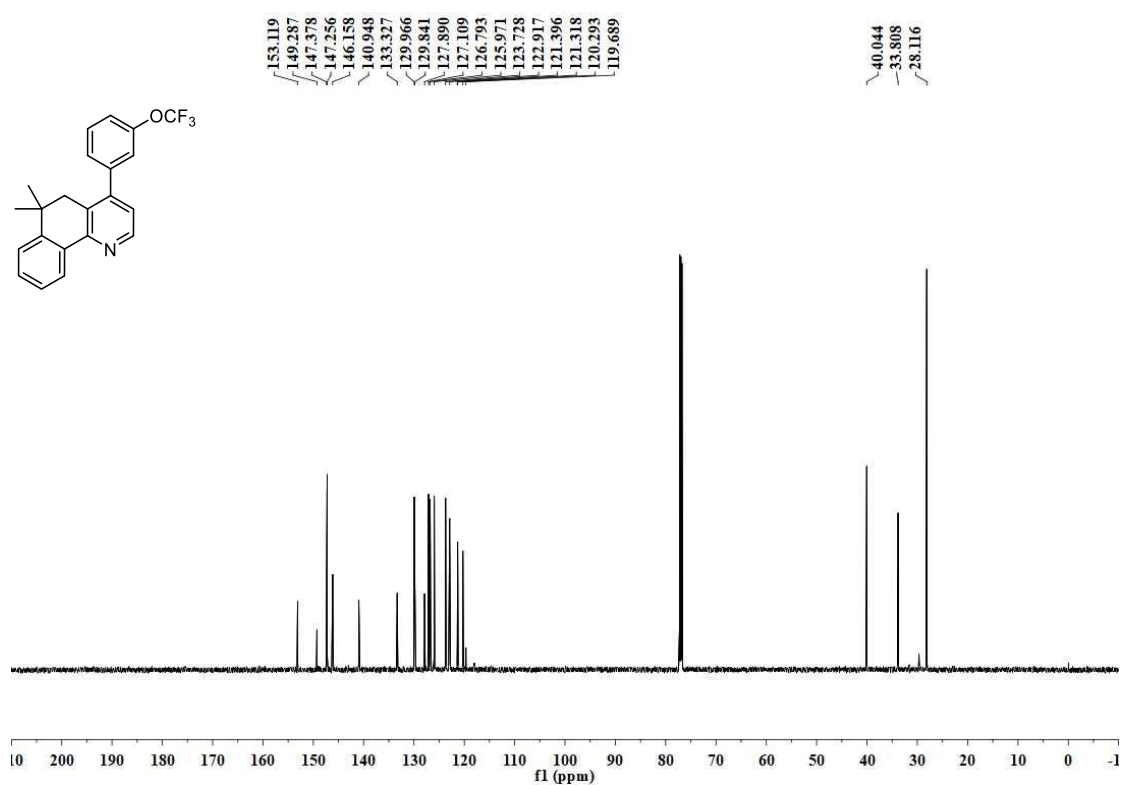

**<sup>19</sup>F NMR Spectrum of 43 (565 MHz, CDCl<sub>3</sub>)**

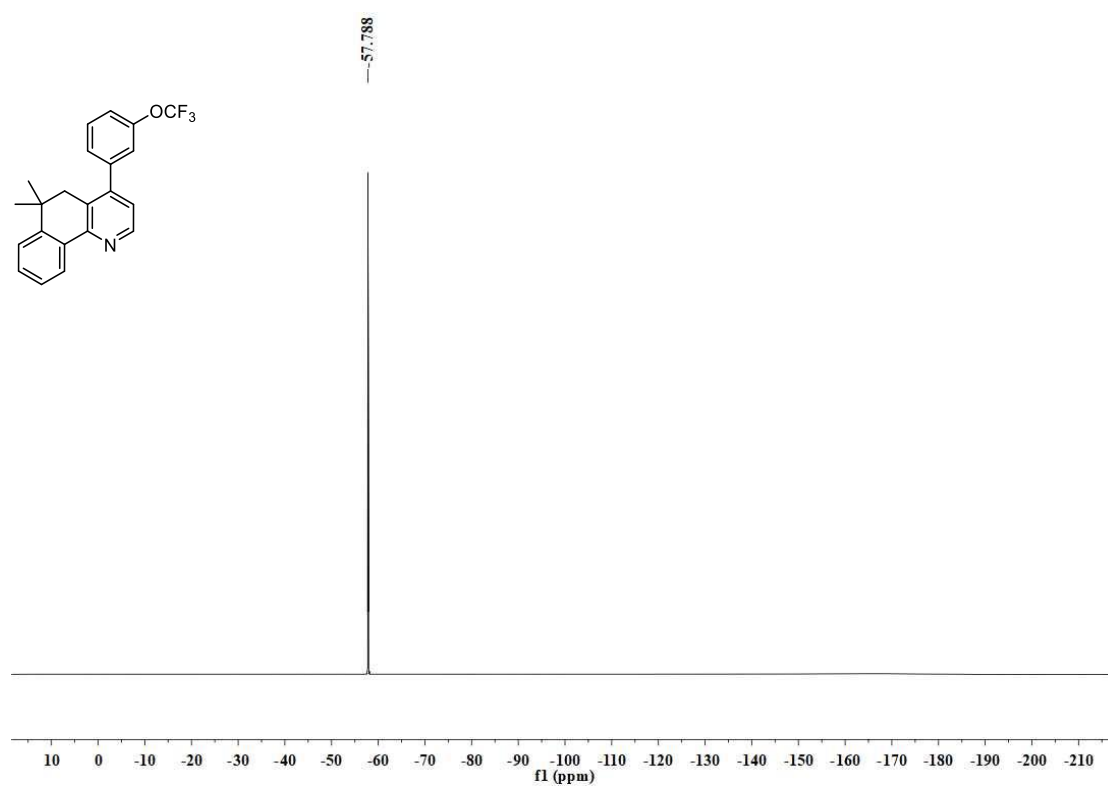

**<sup>1</sup>H NMR Spectrum of 44 (600 MHz, CDCl<sub>3</sub>)**

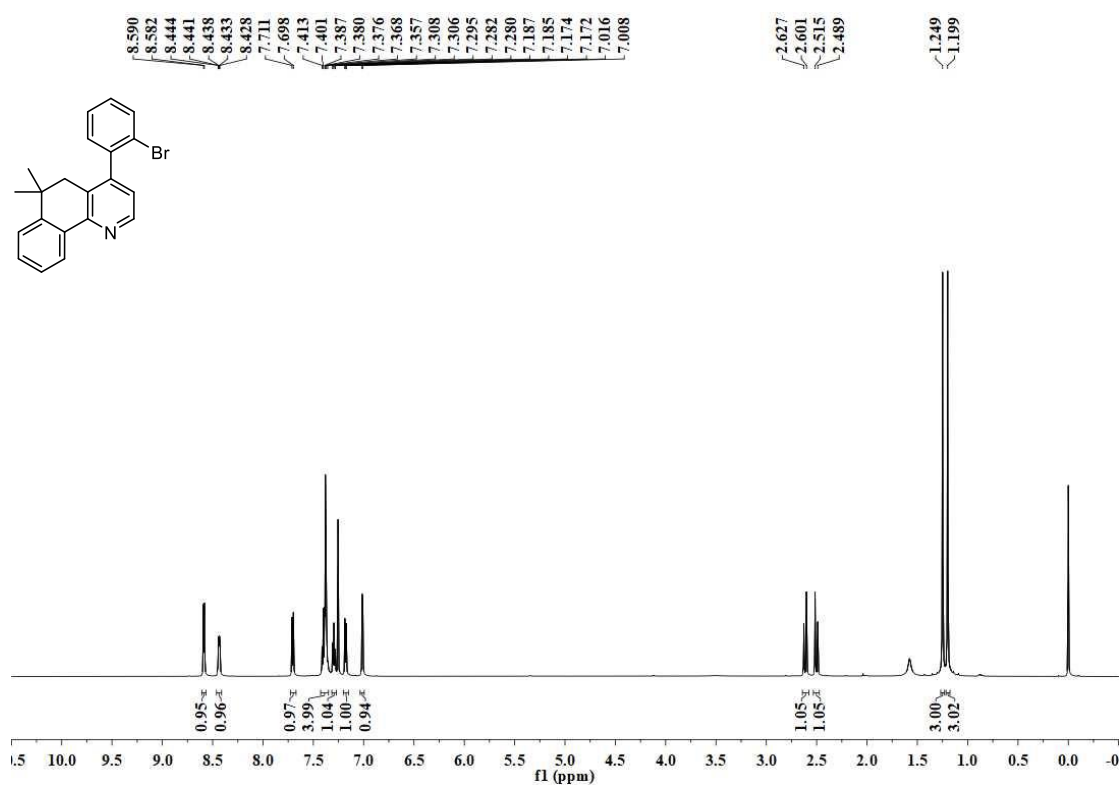

**<sup>13</sup>C NMR Spectrum of 44 (151 MHz, CDCl<sub>3</sub>)**

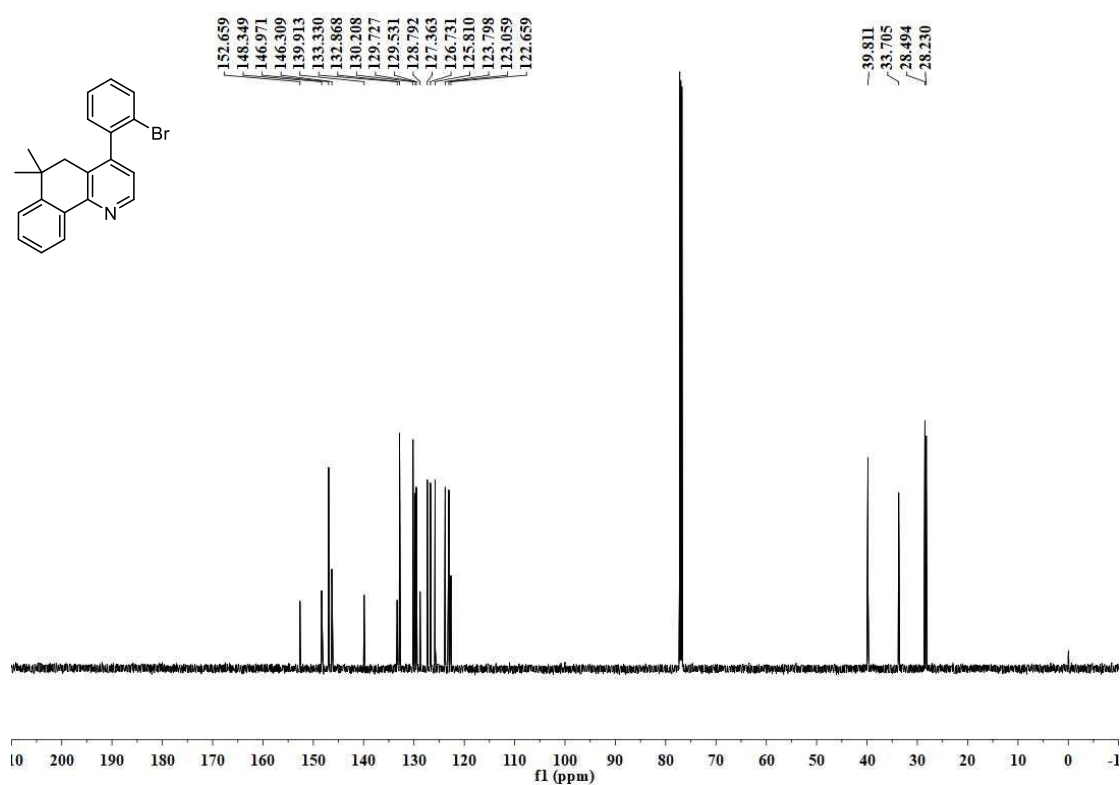

**<sup>1</sup>H NMR Spectrum of 45 (600 MHz, CDCl<sub>3</sub>)**

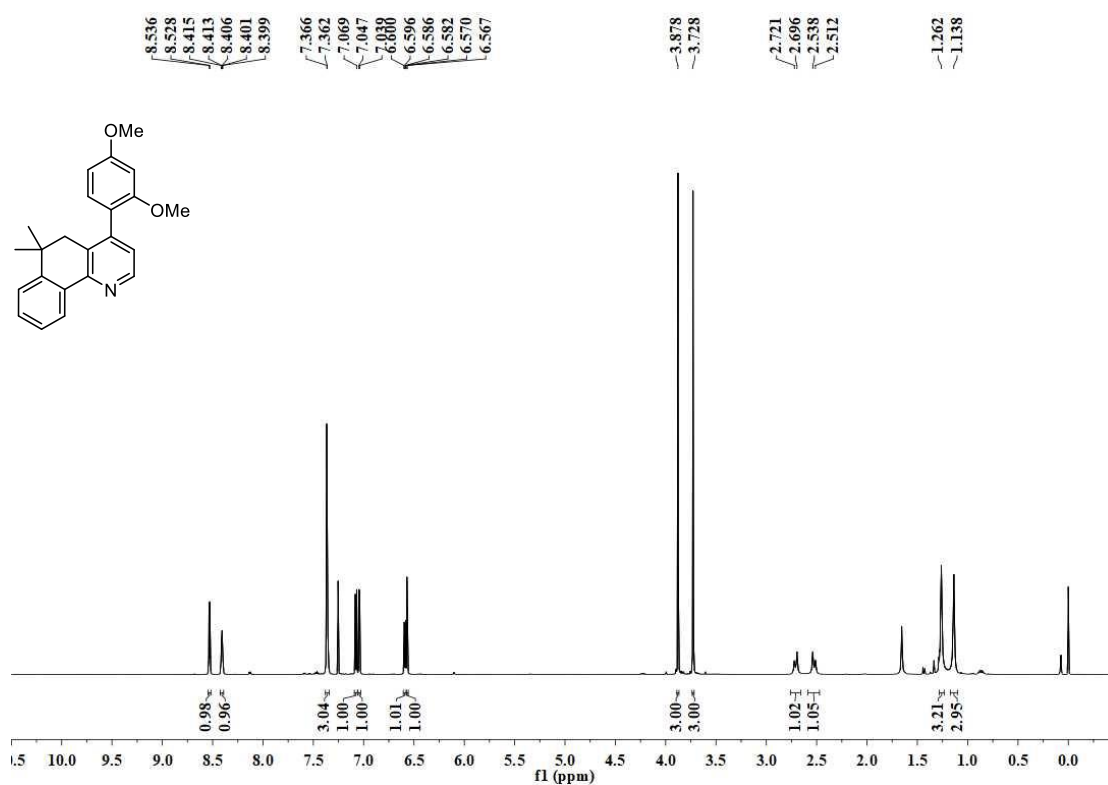

**<sup>13</sup>C NMR Spectrum of 45 (151 MHz, CDCl<sub>3</sub>)**

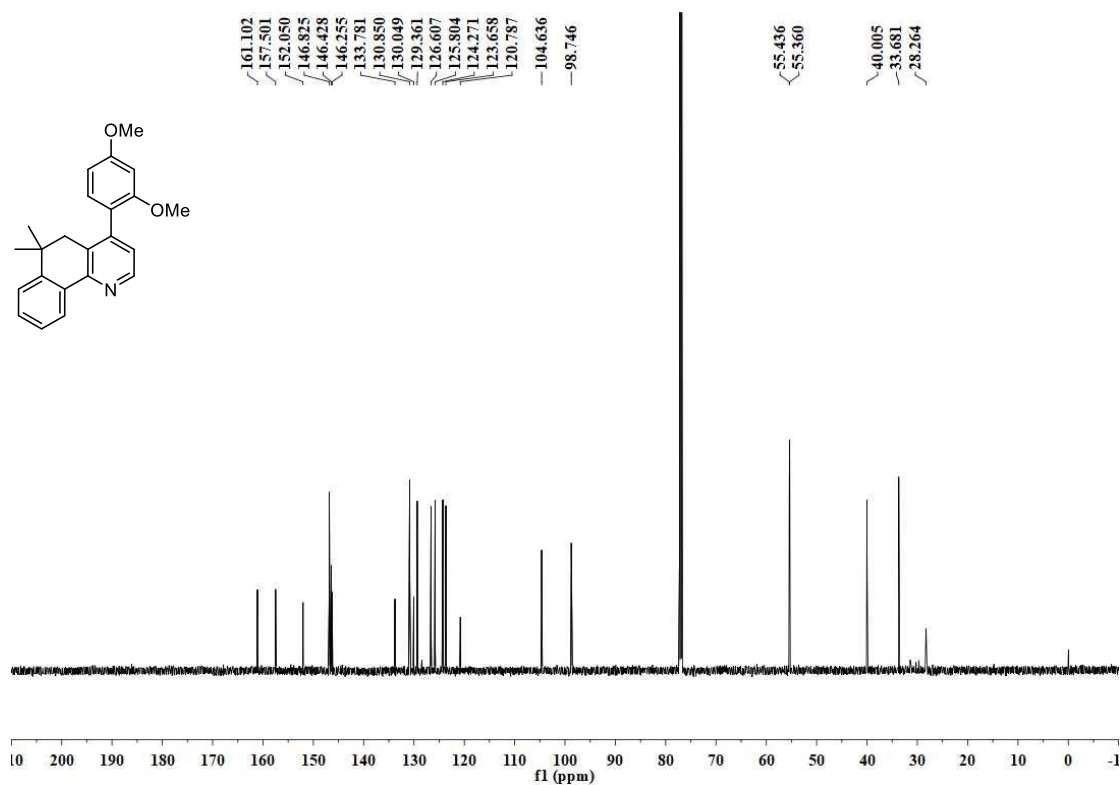

**<sup>1</sup>H NMR Spectrum of 46 (600 MHz, CDCl<sub>3</sub>)**

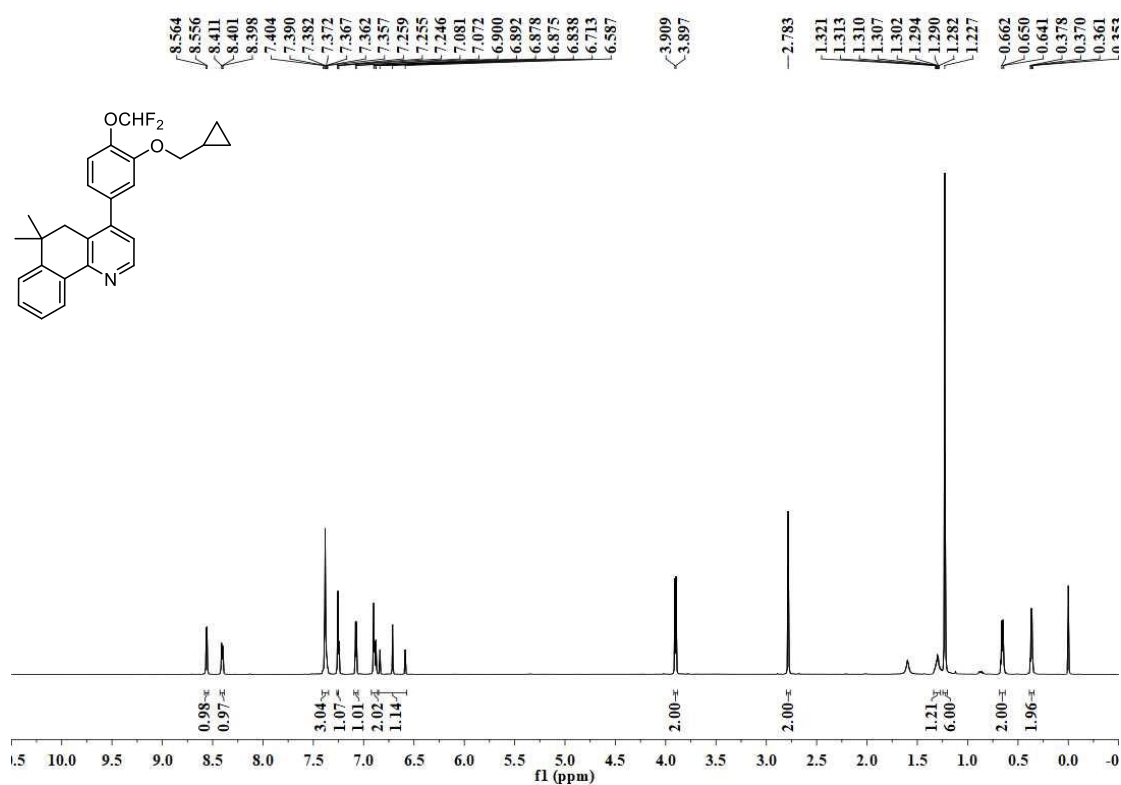

**<sup>13</sup>C NMR Spectrum of 46 (151 MHz, CDCl<sub>3</sub>)**

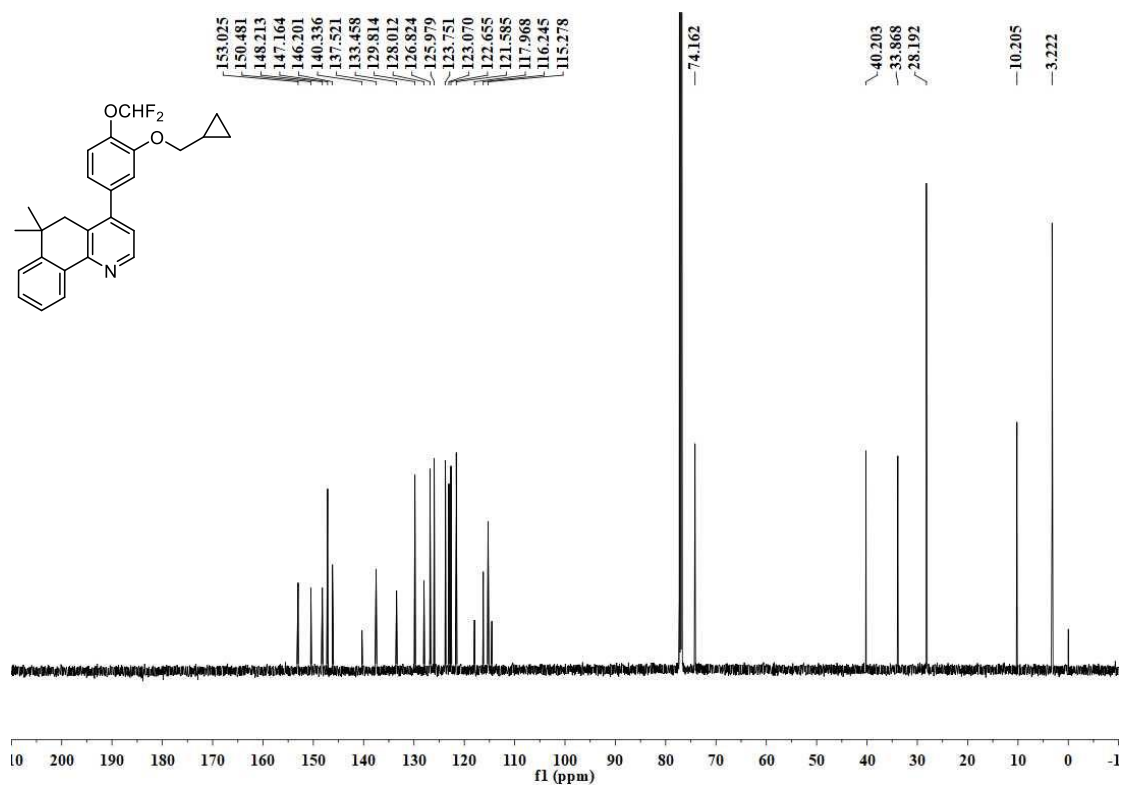

**$^{19}\text{F}$  NMR Spectrum of 46 (565 MHz,  $\text{CDCl}_3$ )**

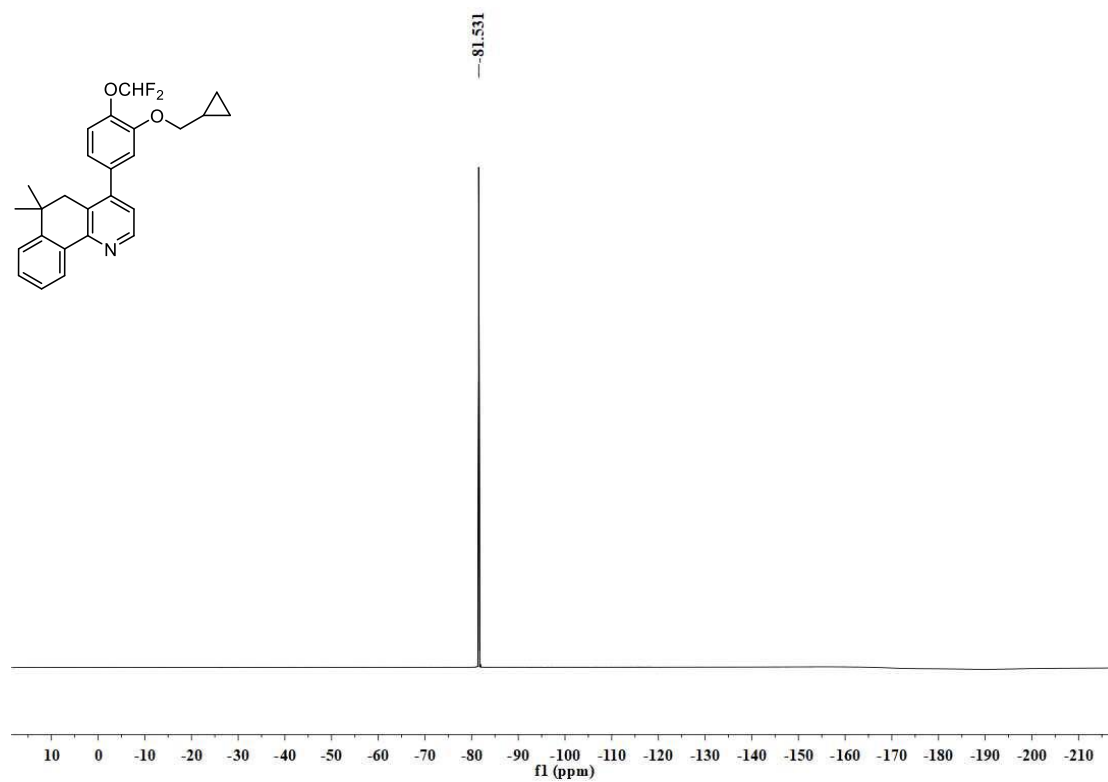

**$^1\text{H}$  NMR Spectrum of 47 (600 MHz,  $\text{CDCl}_3$ )**

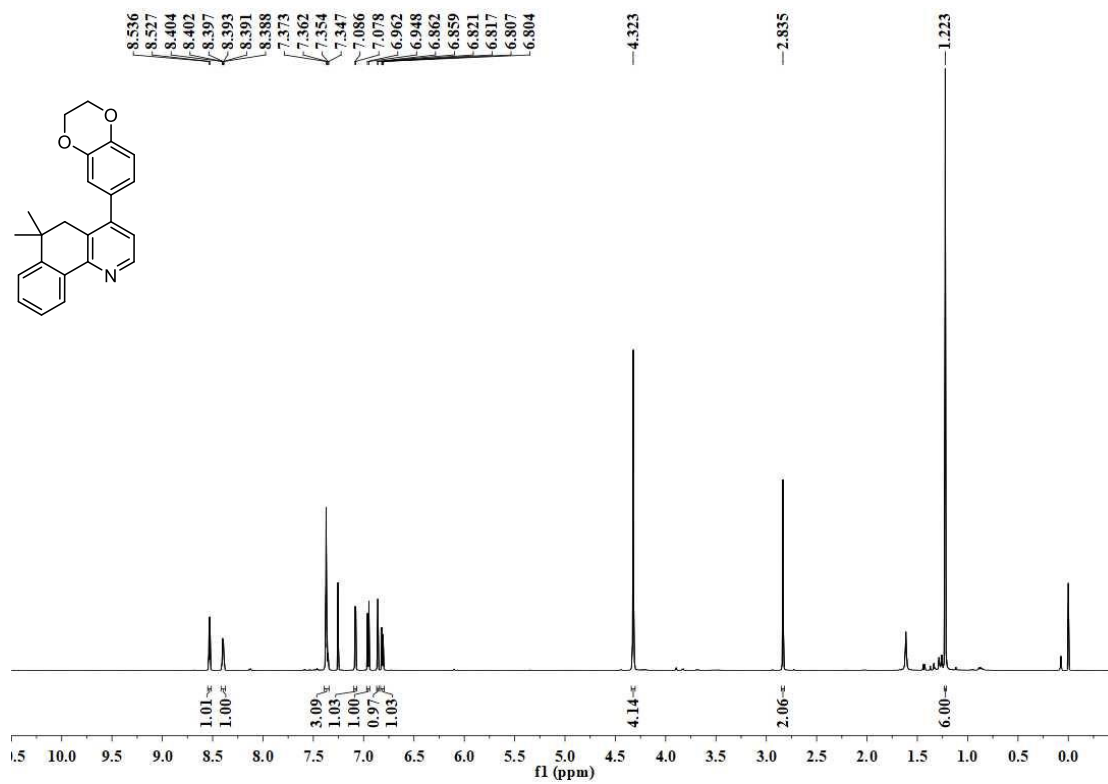

**$^{13}\text{C}$  NMR Spectrum of 47 (151 MHz,  $\text{CDCl}_3$ )**

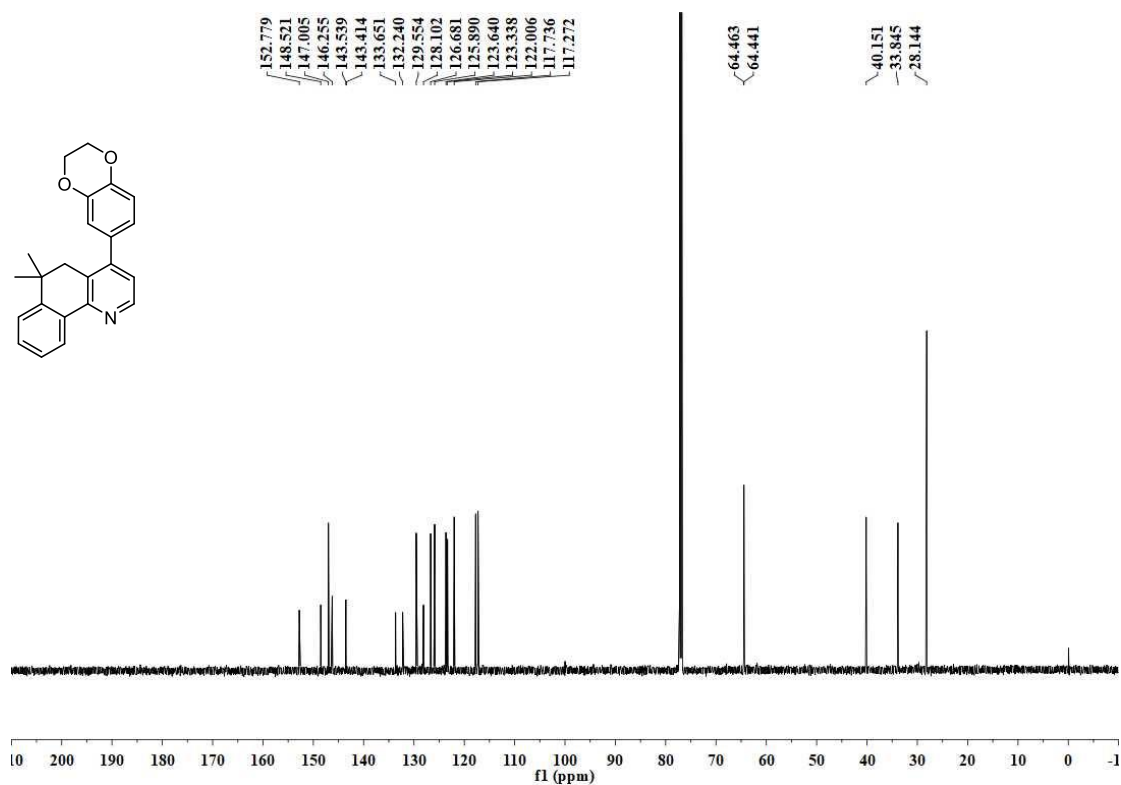

**$^1\text{H}$  NMR Spectrum of 48 (400 MHz,  $\text{CDCl}_3$ )**

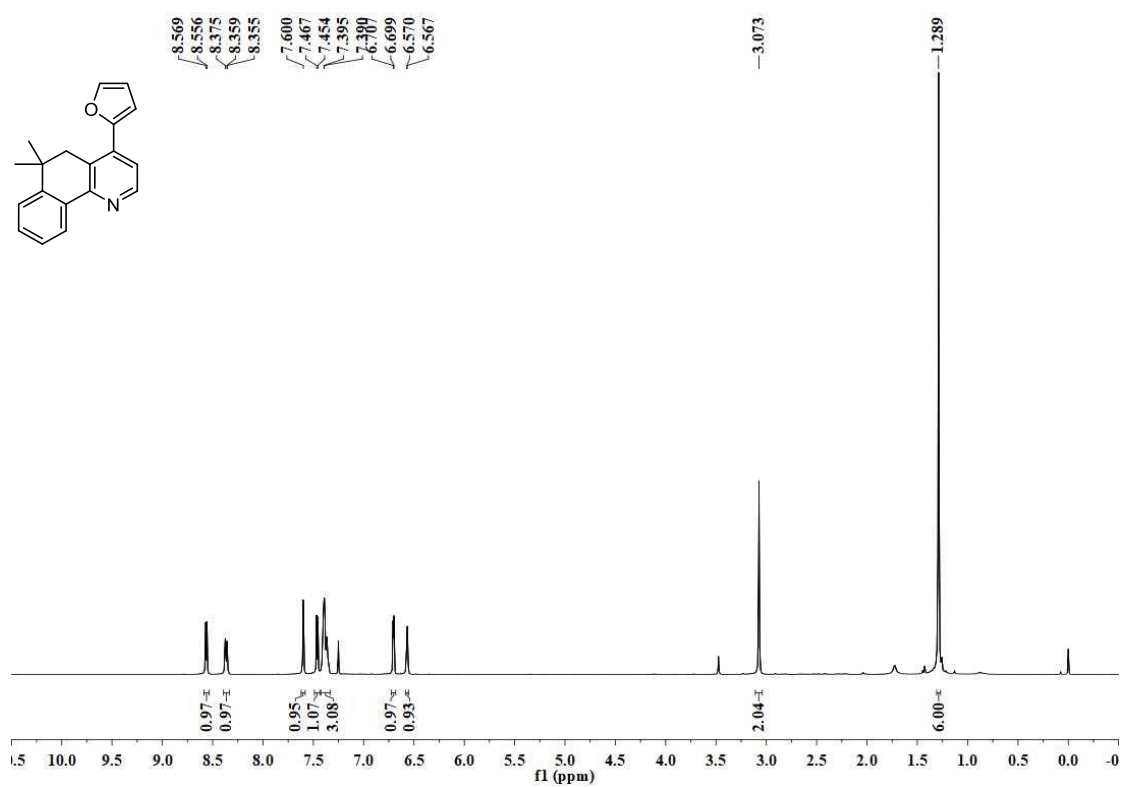



**<sup>13</sup>C NMR Spectrum of 48 (101 MHz, CDCl<sub>3</sub>)**

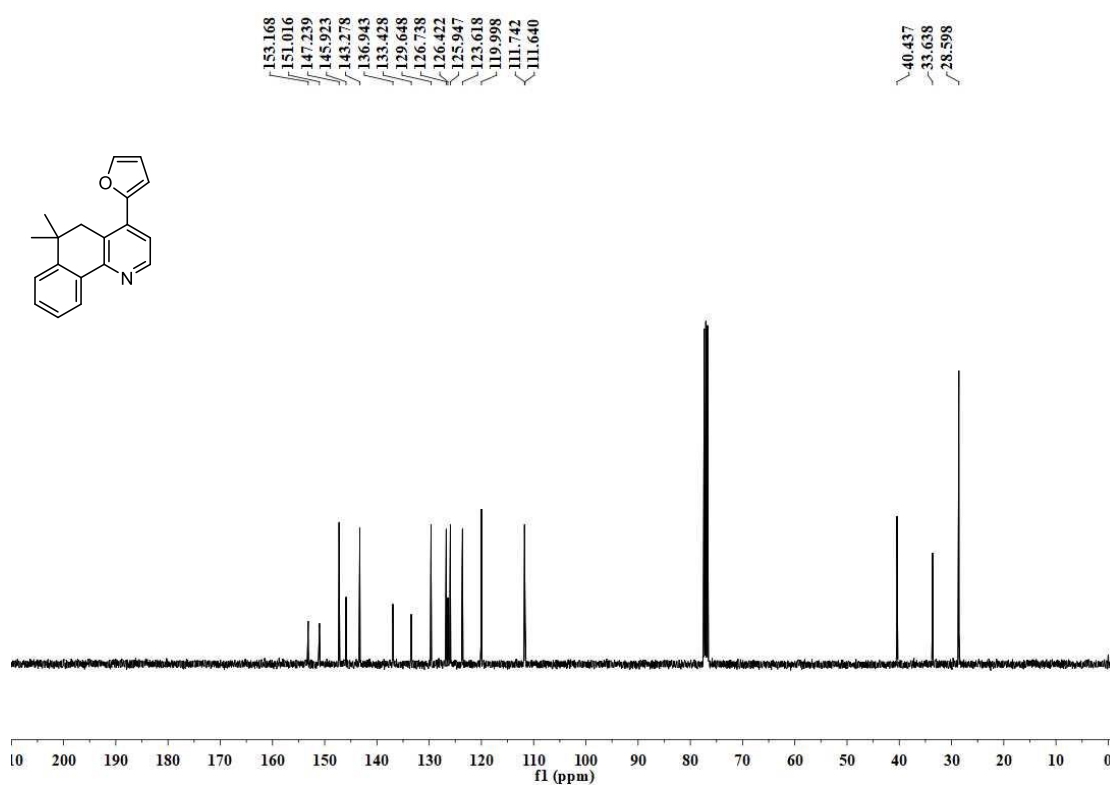

**<sup>1</sup>H NMR Spectrum of 49 (600 MHz, CDCl<sub>3</sub>)**

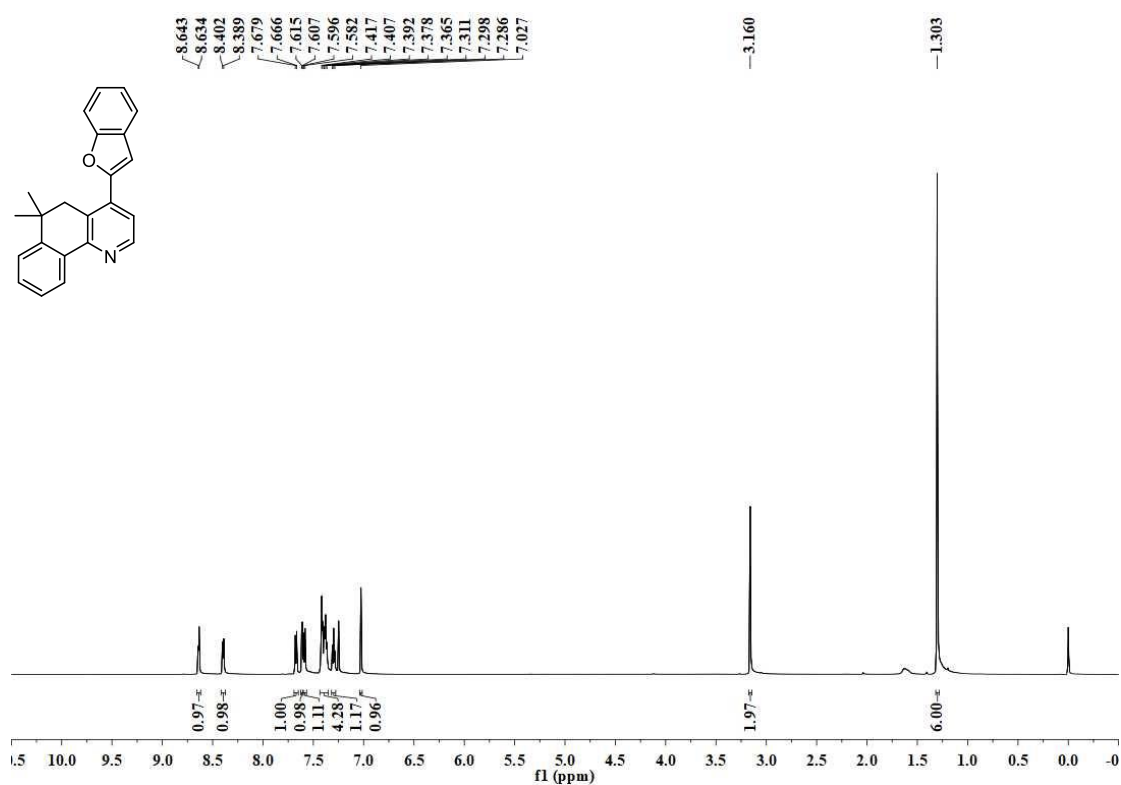

**<sup>13</sup>C NMR Spectrum of 49 (151 MHz, CDCl<sub>3</sub>)**

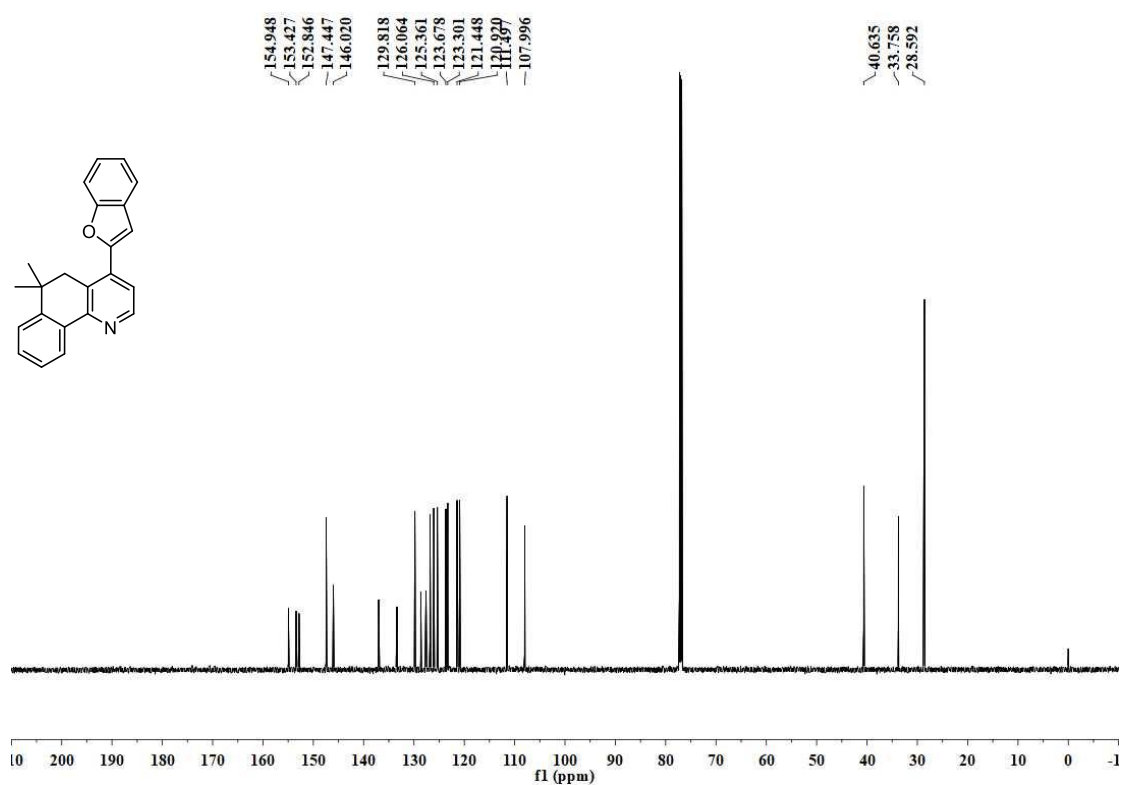

**<sup>1</sup>H NMR Spectrum of 50 (600 MHz, CDCl<sub>3</sub>)**

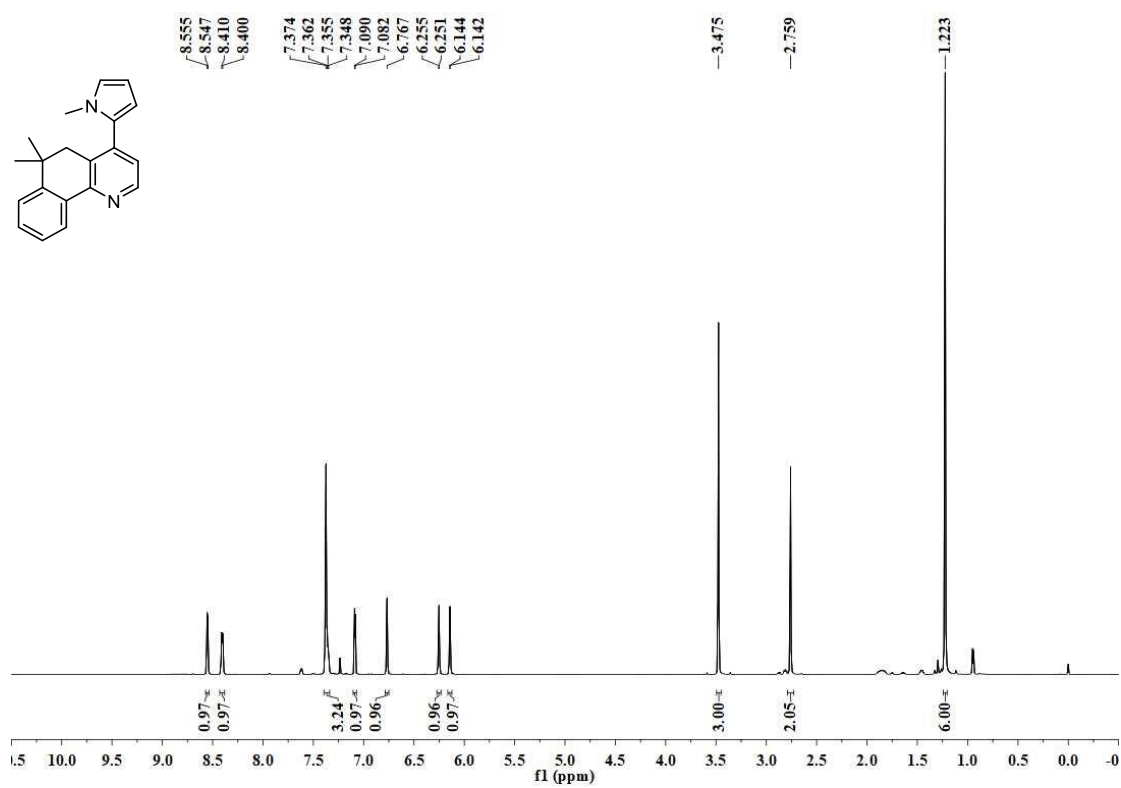

**$^{13}\text{C}$  NMR Spectrum of 50 (151 MHz,  $\text{CDCl}_3$ )**

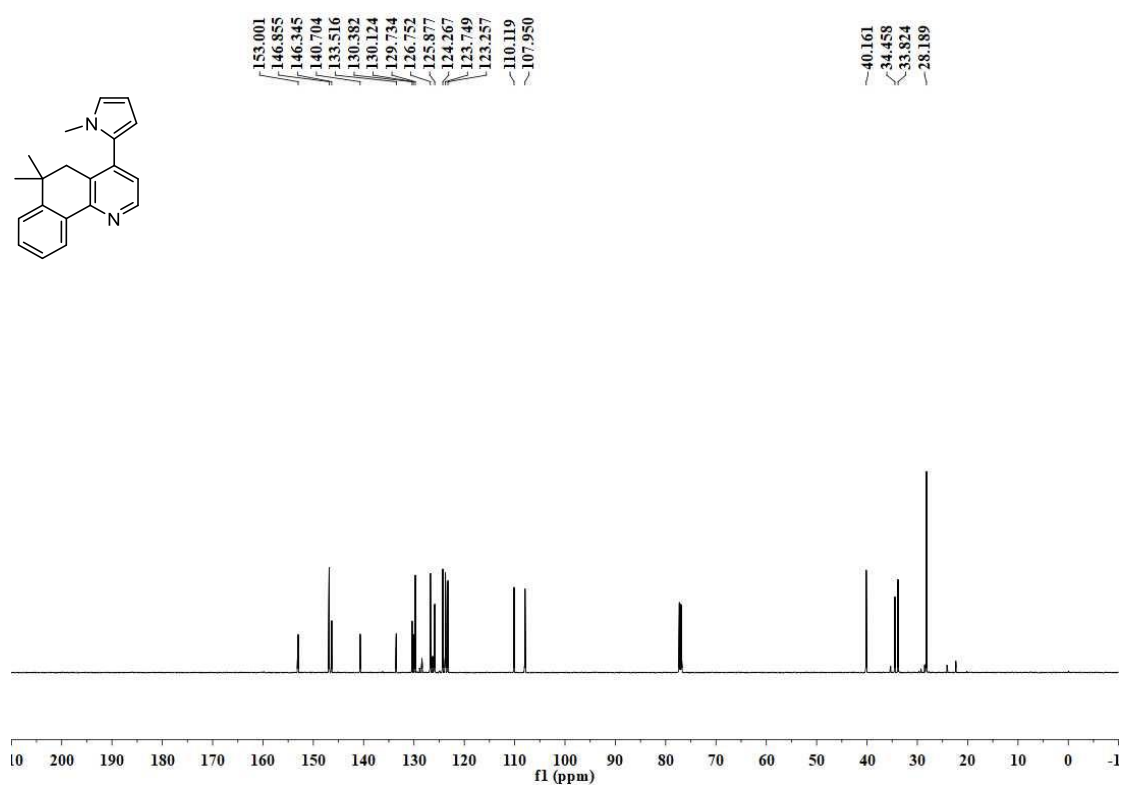

**$^1\text{H}$  NMR Spectrum of 51 (600 MHz,  $\text{CDCl}_3$ )**

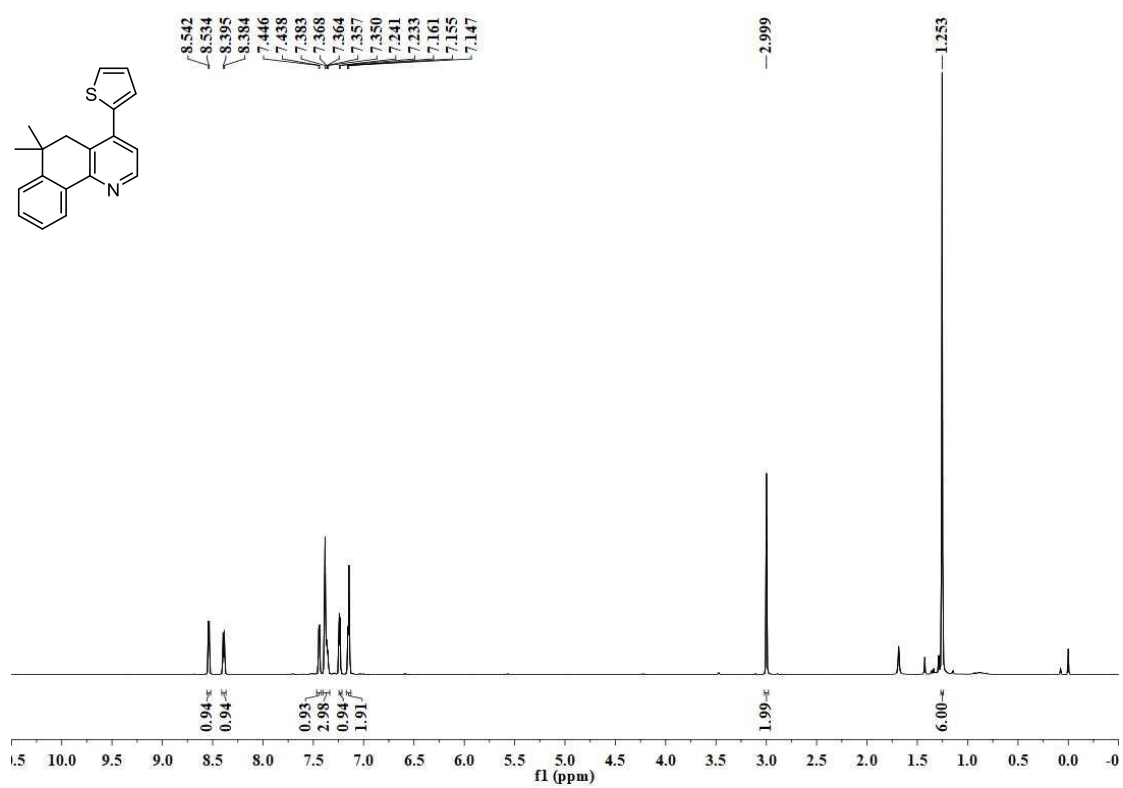

**$^{13}\text{C}$  NMR Spectrum of **51** (151 MHz,  $\text{CDCl}_3$ )**

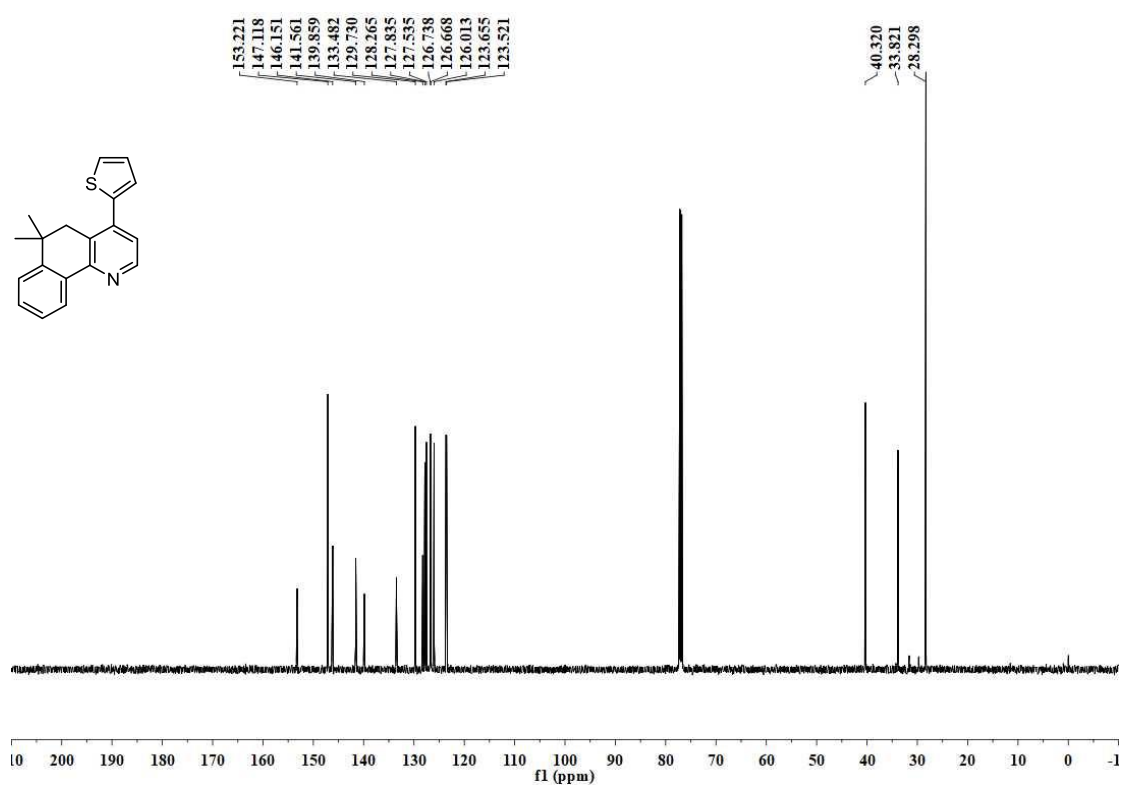

**$^1\text{H}$  NMR Spectrum of **52** (600 MHz,  $\text{CDCl}_3$ )**

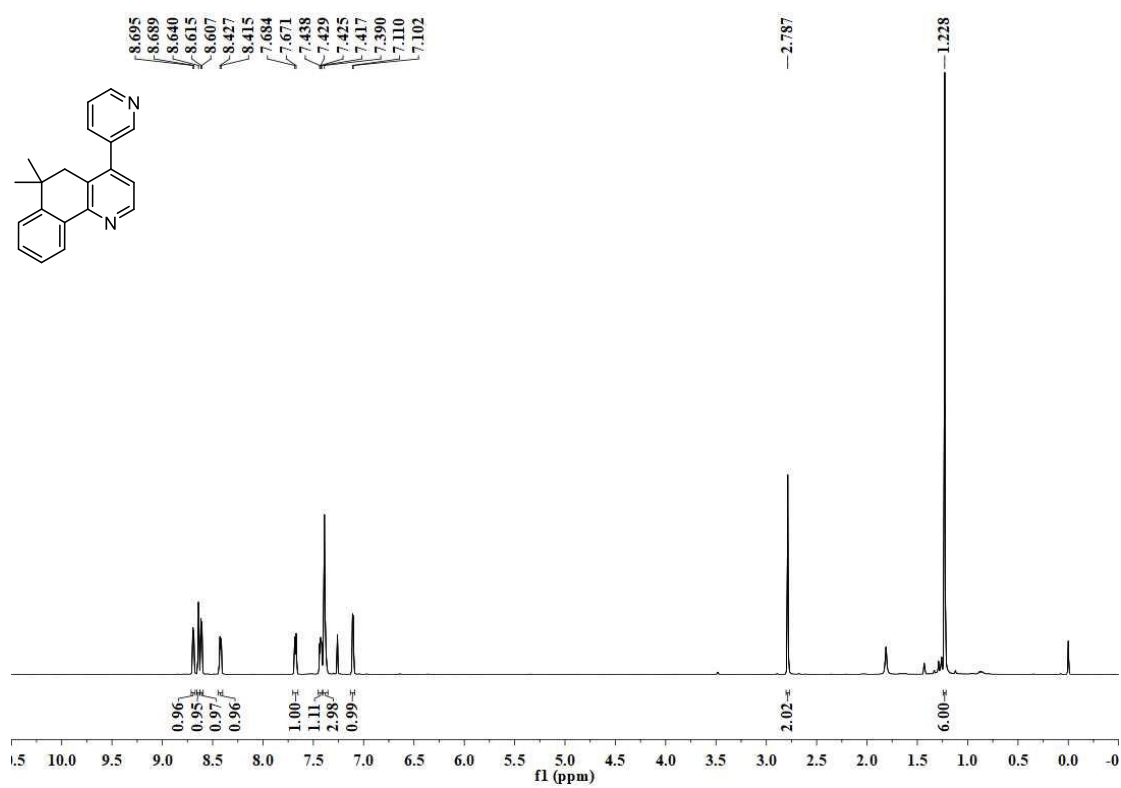

**$^{13}\text{C}$  NMR Spectrum of **52** (151 MHz,  $\text{CDCl}_3$ )**

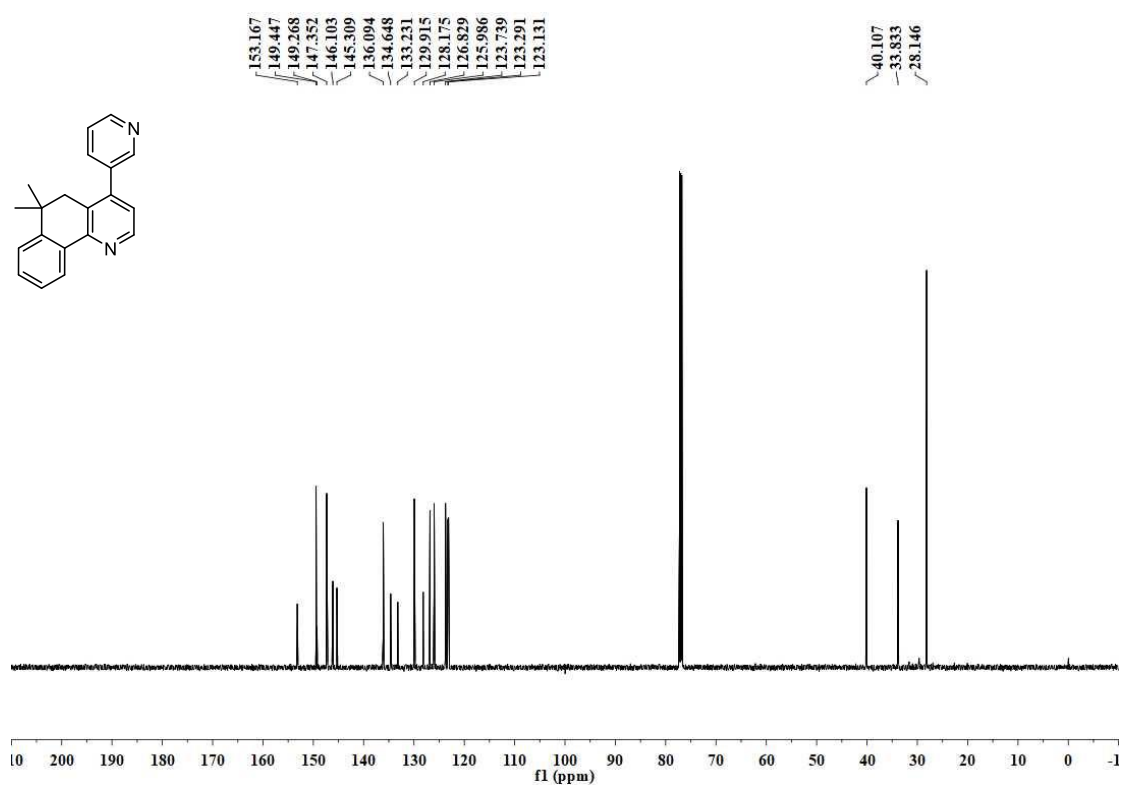

**$^1\text{H}$  NMR Spectrum of **53** (600 MHz,  $\text{CDCl}_3$ )**

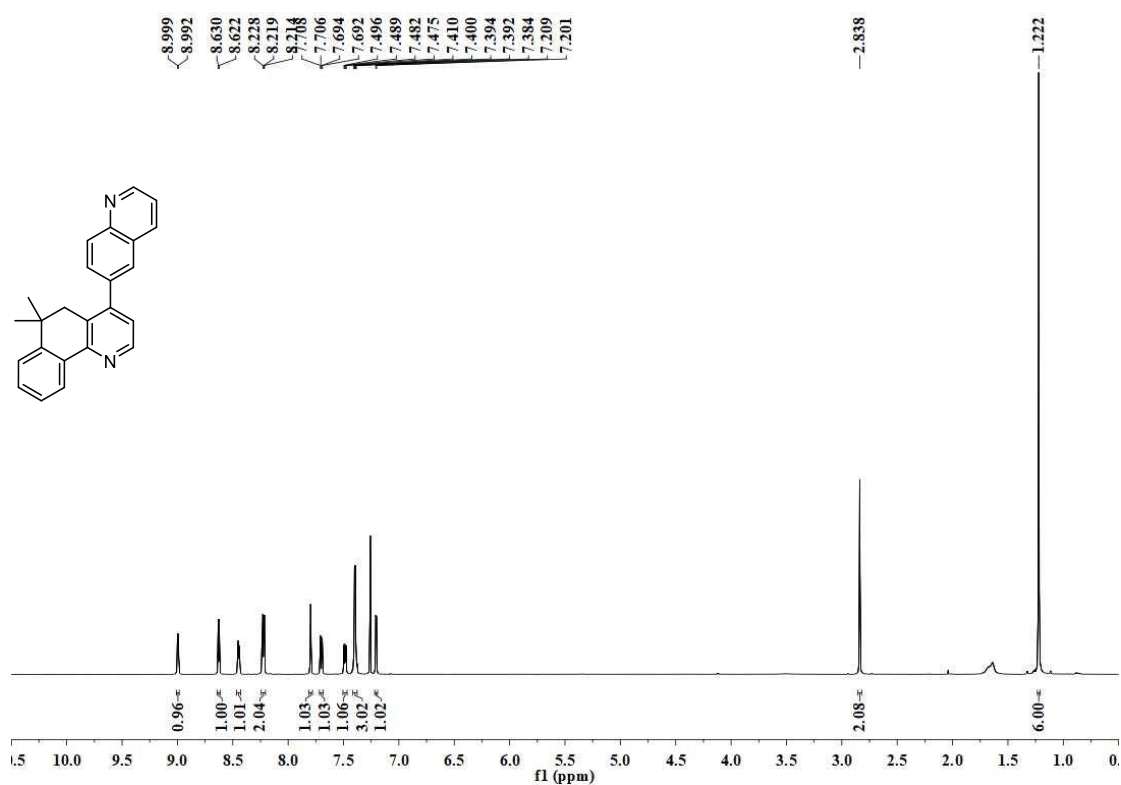

**<sup>13</sup>C NMR Spectrum of 53 (151 MHz, CDCl<sub>3</sub>)**

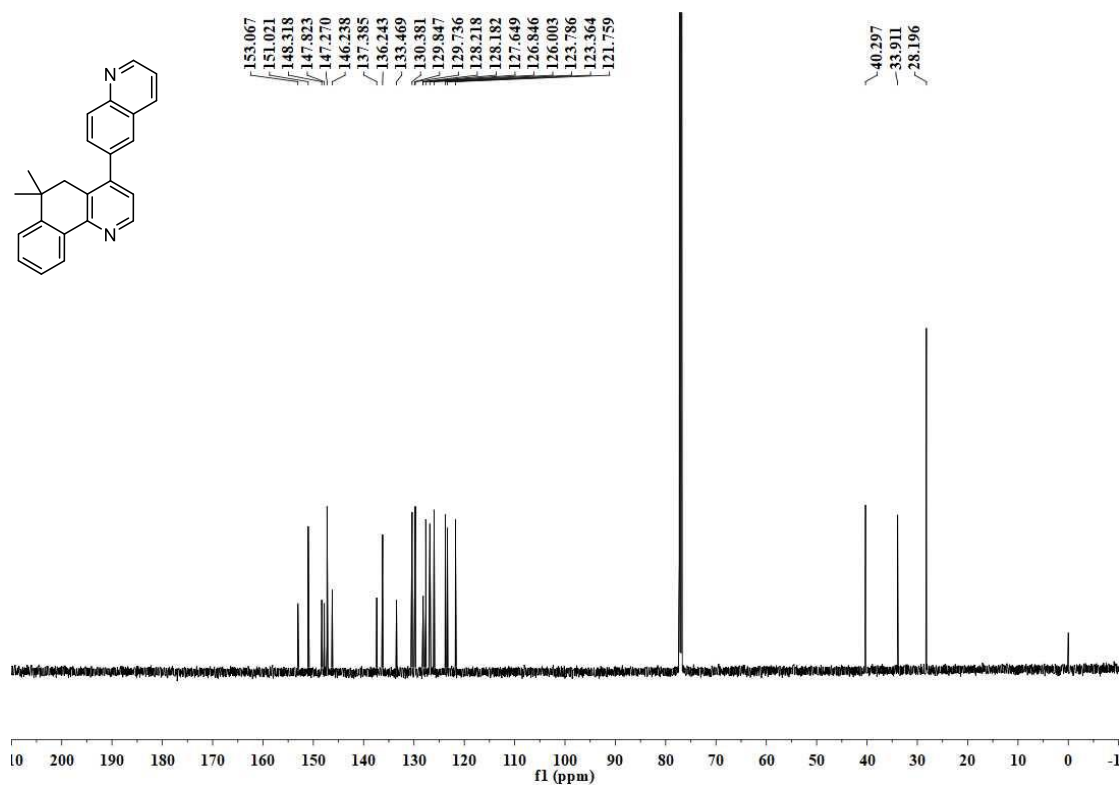

**<sup>1</sup>H NMR Spectrum of 54 (600 MHz, CDCl<sub>3</sub>)**

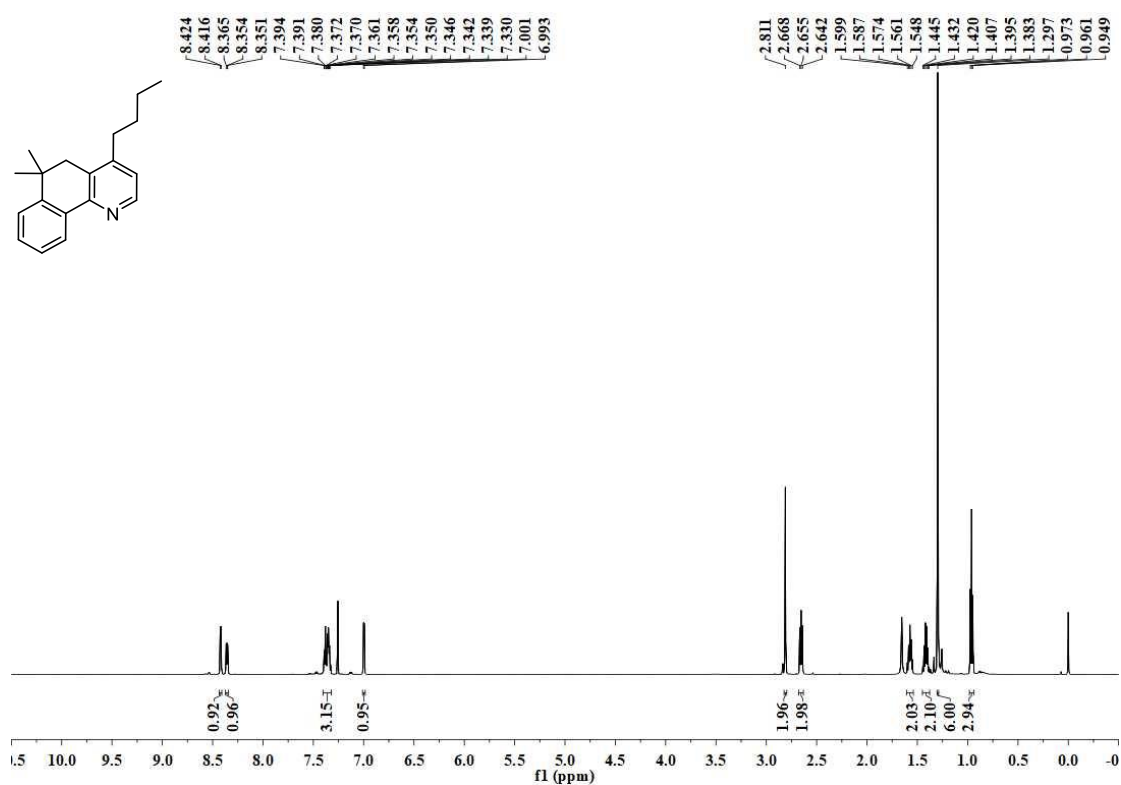

**$^{13}\text{C}$  NMR Spectrum of **54** (151 MHz,  $\text{CDCl}_3$ )**

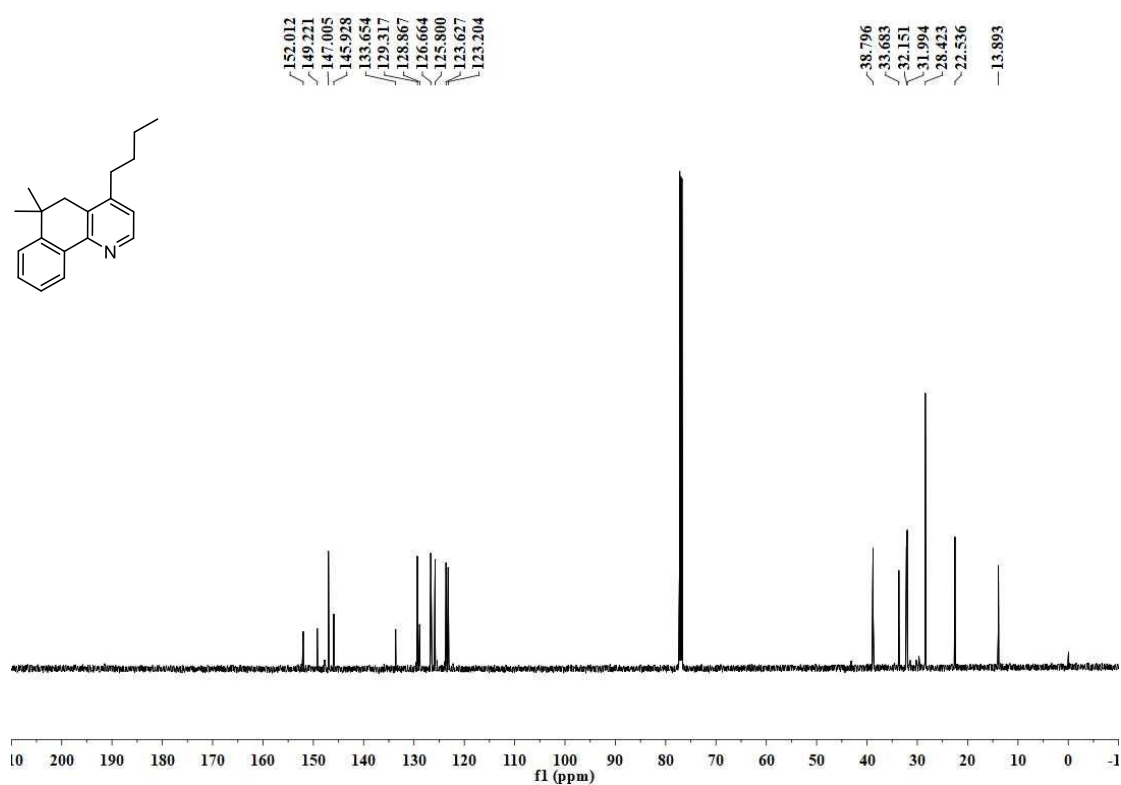

**$^1\text{H}$  NMR Spectrum of **55** (600 MHz,  $\text{CDCl}_3$ )**

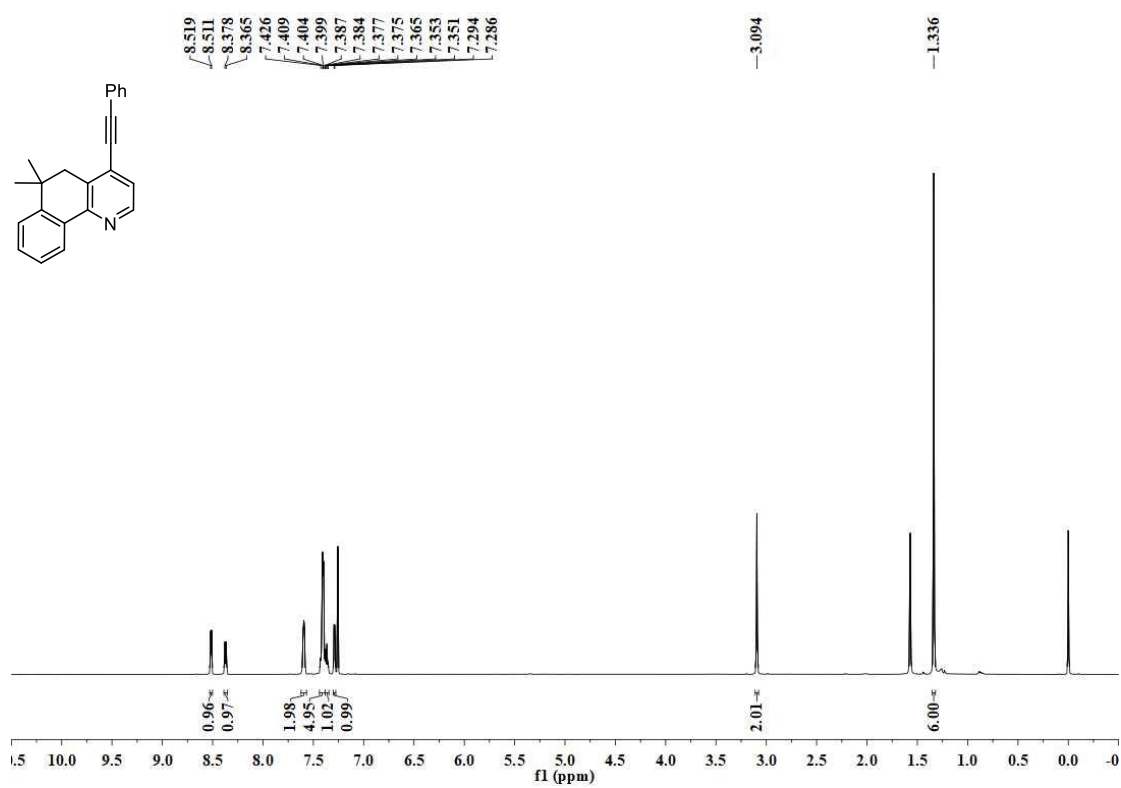

**$^{13}\text{C}$  NMR Spectrum of **55** (151 MHz,  $\text{CDCl}_3$ )**

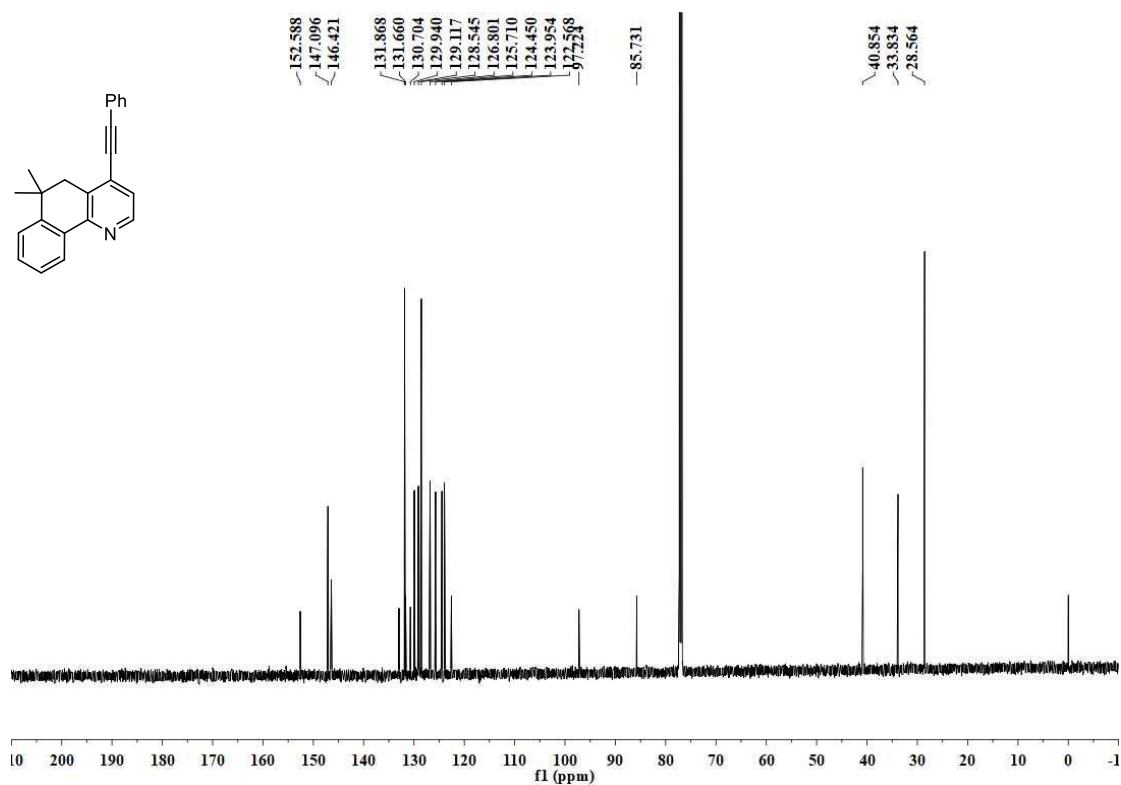

**$^1\text{H}$  NMR Spectrum of **56** (600 MHz,  $\text{CDCl}_3$ )**

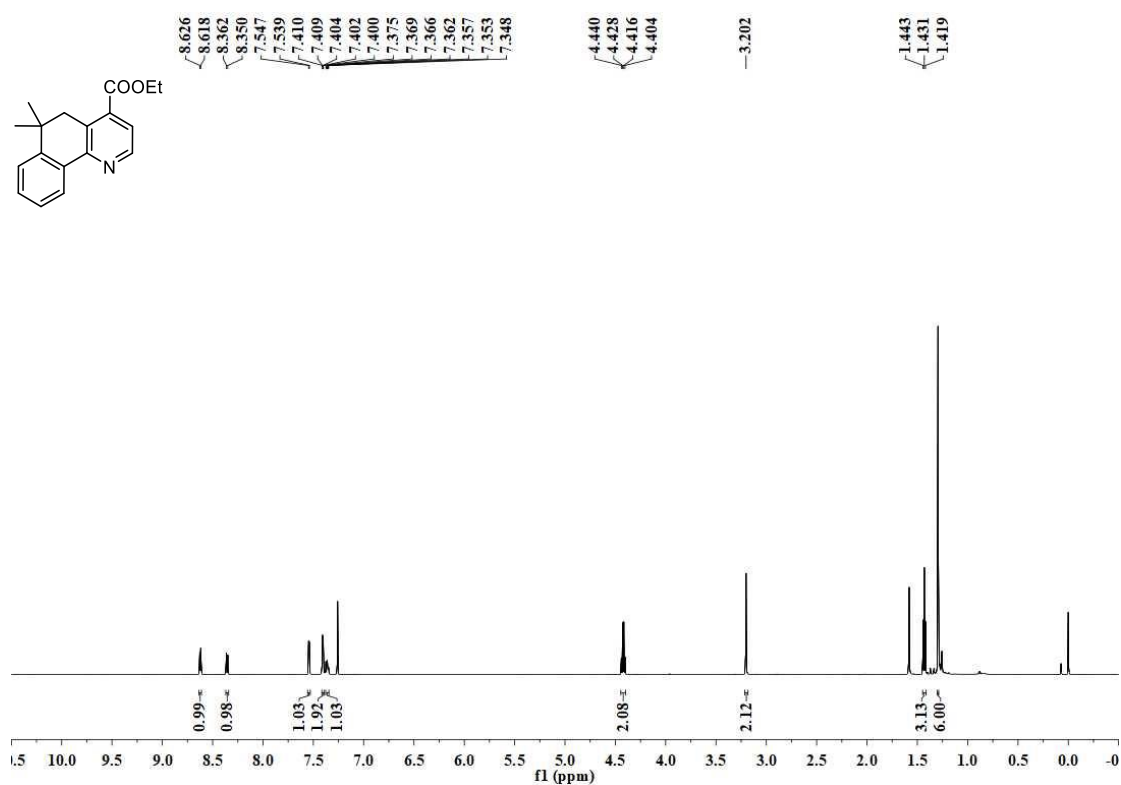



**<sup>13</sup>C NMR Spectrum of 56 (151 MHz, CDCl<sub>3</sub>)**

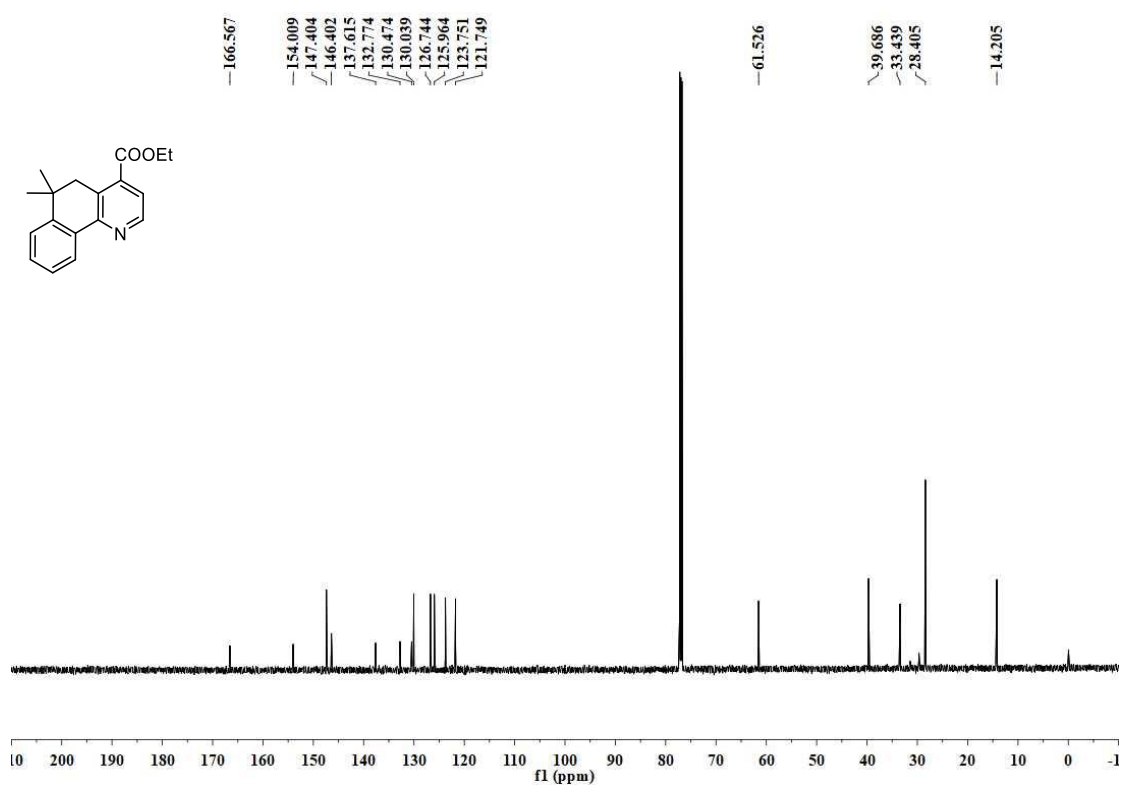

**<sup>1</sup>H NMR Spectrum of 57 (600 MHz, CDCl<sub>3</sub>)**

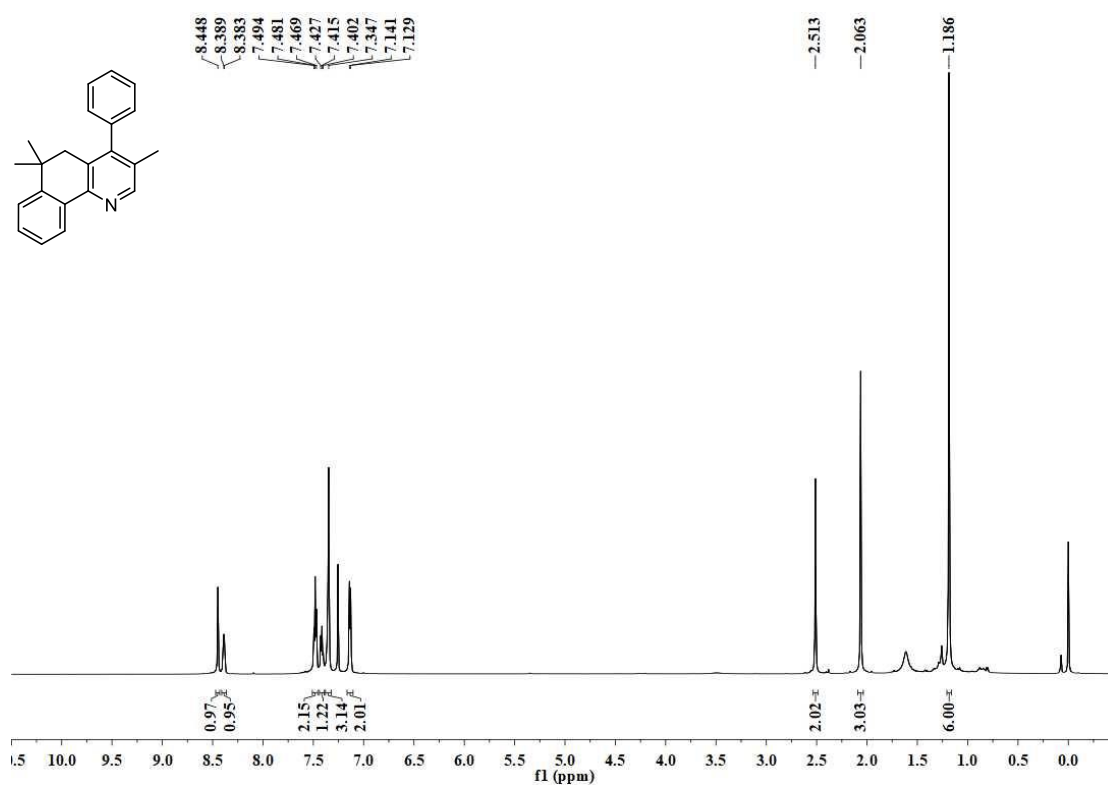

**<sup>13</sup>C NMR Spectrum of 57 (151 MHz, CDCl<sub>3</sub>)**

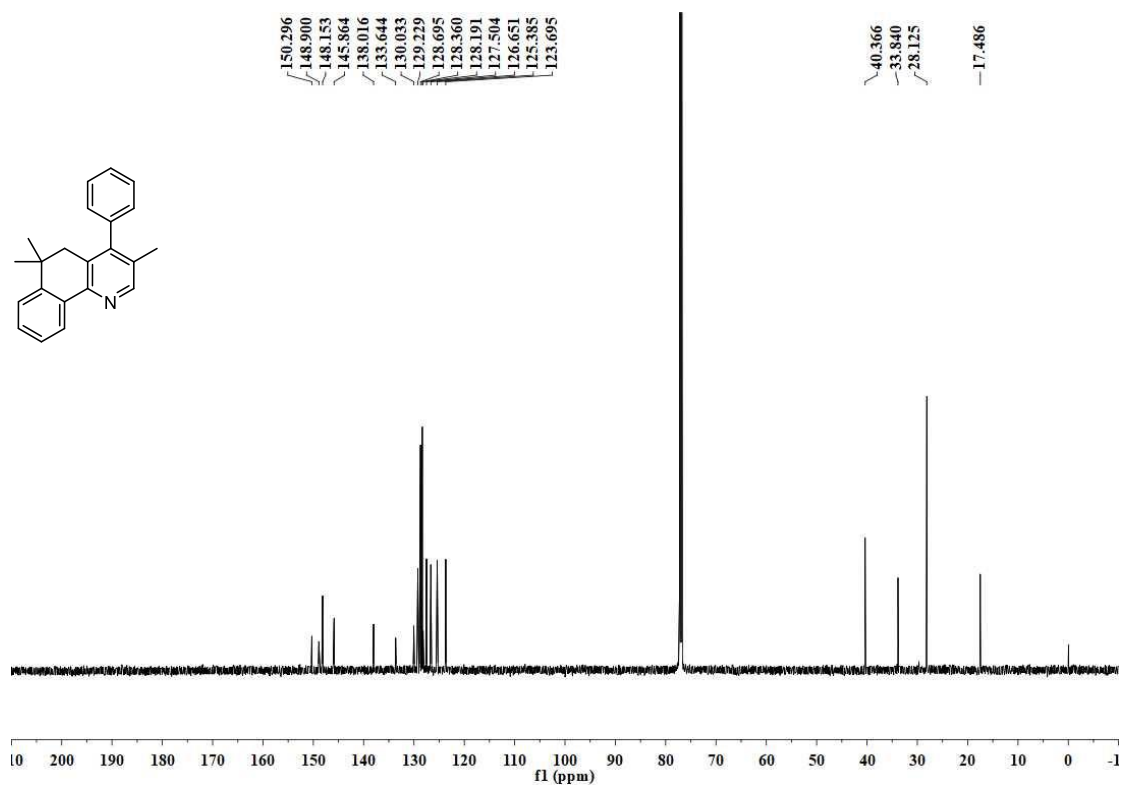

**<sup>1</sup>H NMR Spectrum of 58 (600 MHz, CDCl<sub>3</sub>)**

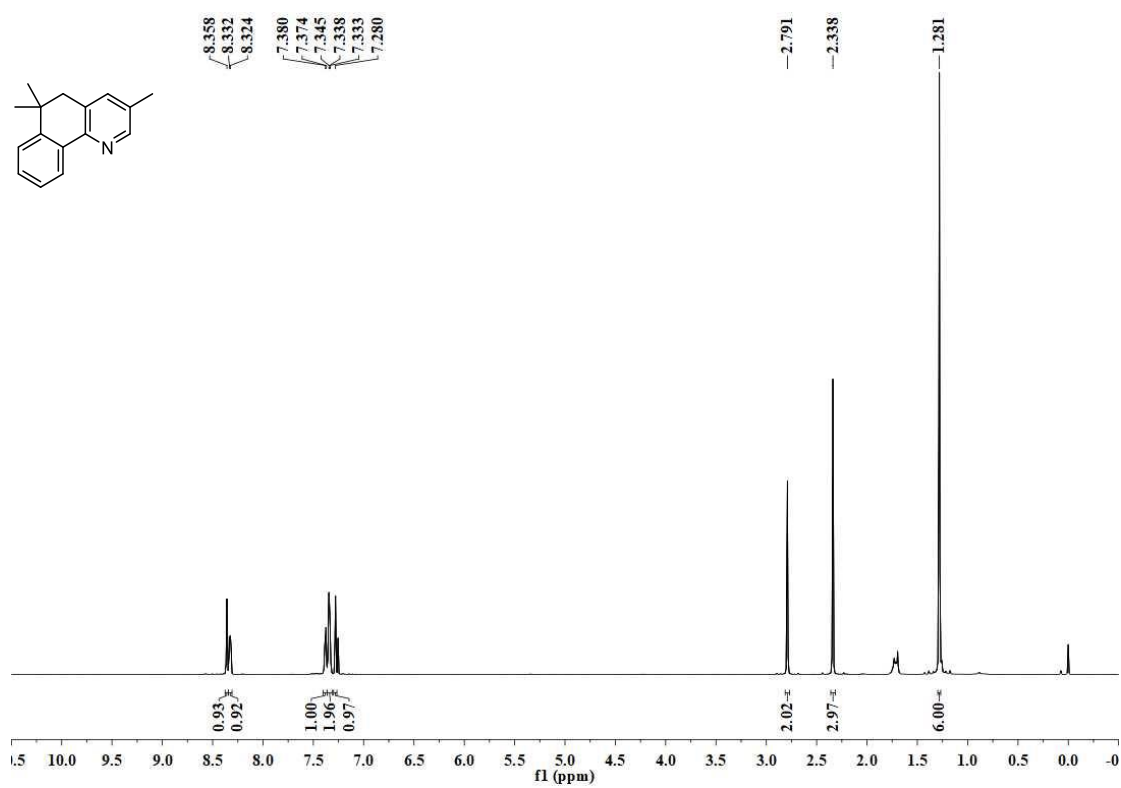

**$^{13}\text{C}$  NMR Spectrum of **58** (151 MHz,  $\text{CDCl}_3$ )**

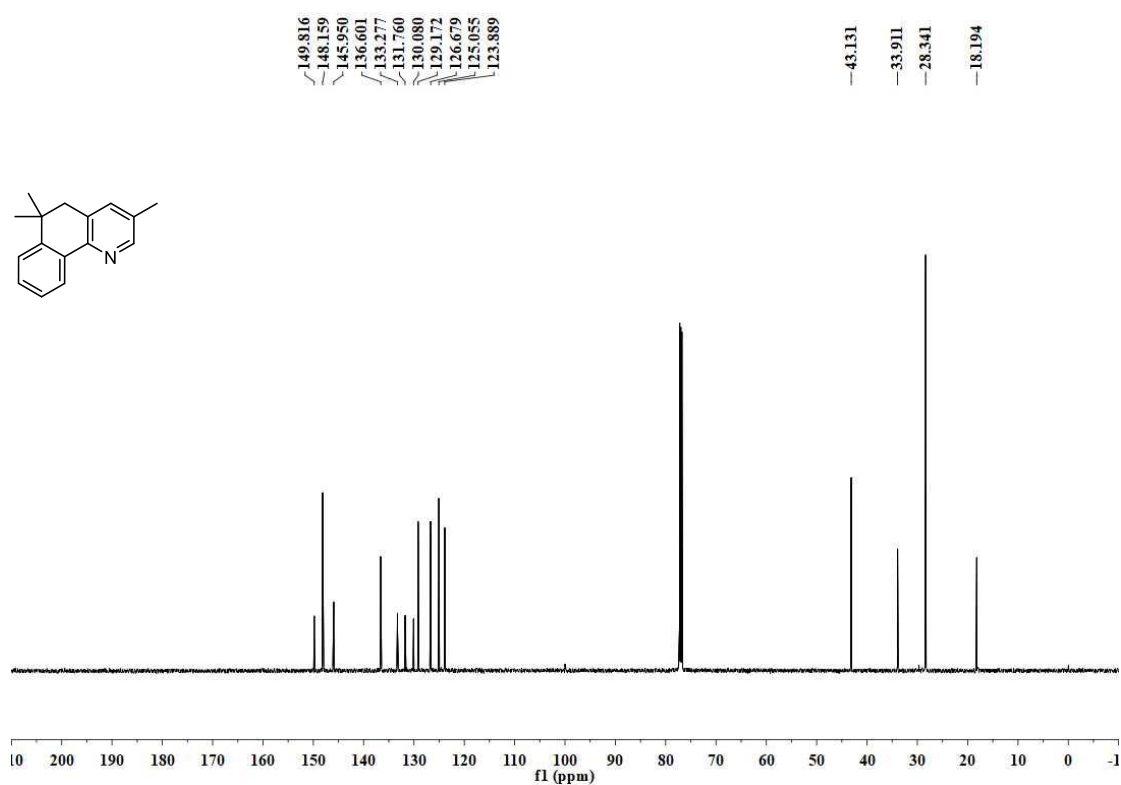

**$^1\text{H}$  NMR Spectrum of **59** (600 MHz,  $\text{CDCl}_3$ )**

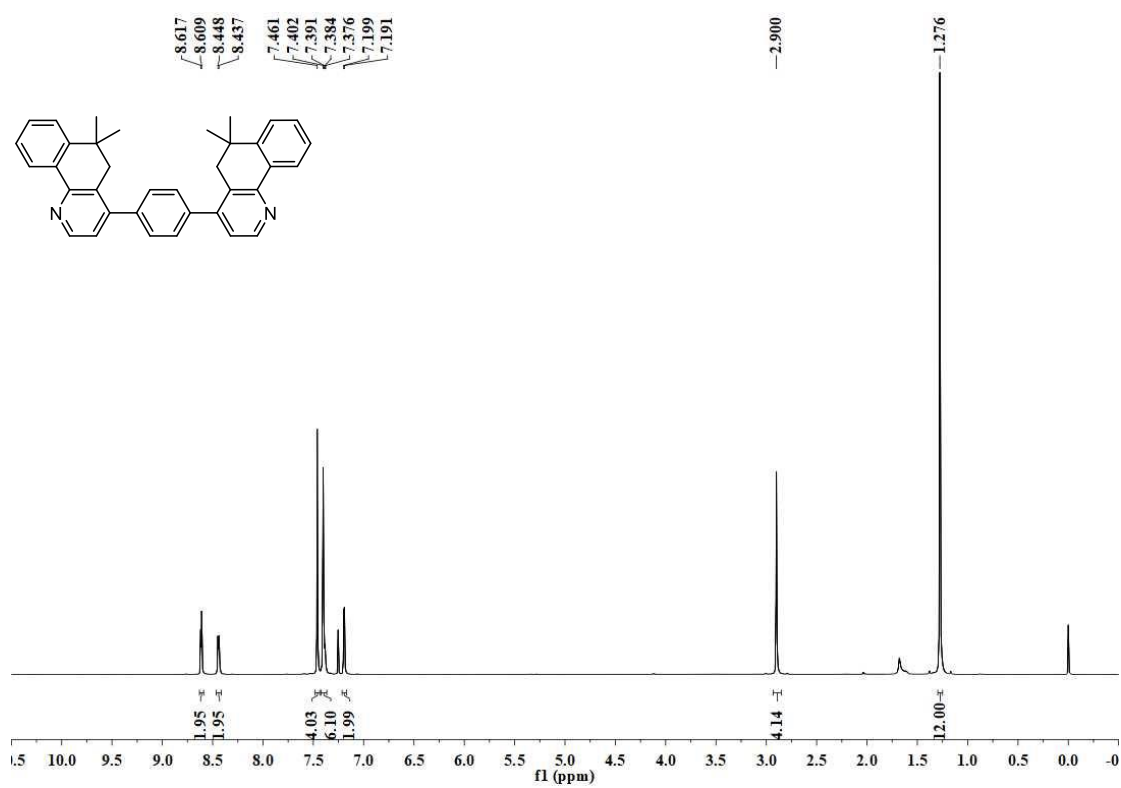

**$^{13}\text{C}$  NMR Spectrum of **59** (151 MHz,  $\text{CDCl}_3$ )**

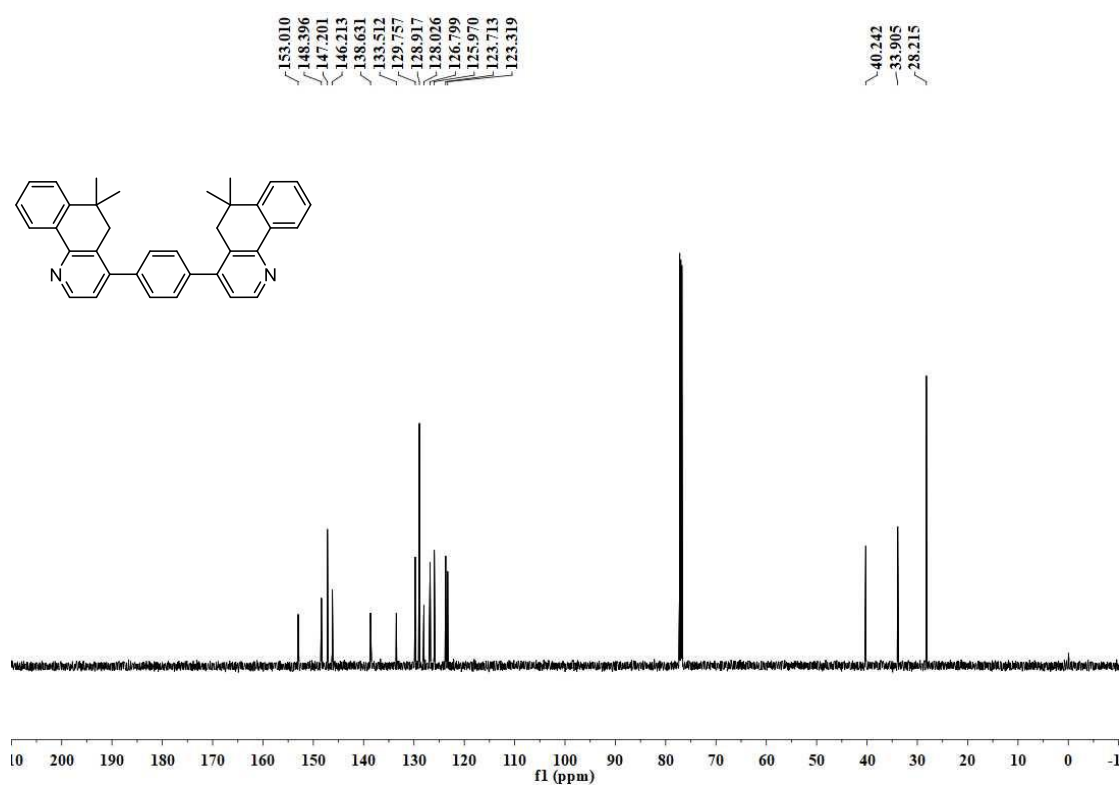

**$^1\text{H}$  NMR Spectrum of **60** (600 MHz,  $\text{CDCl}_3$ )**

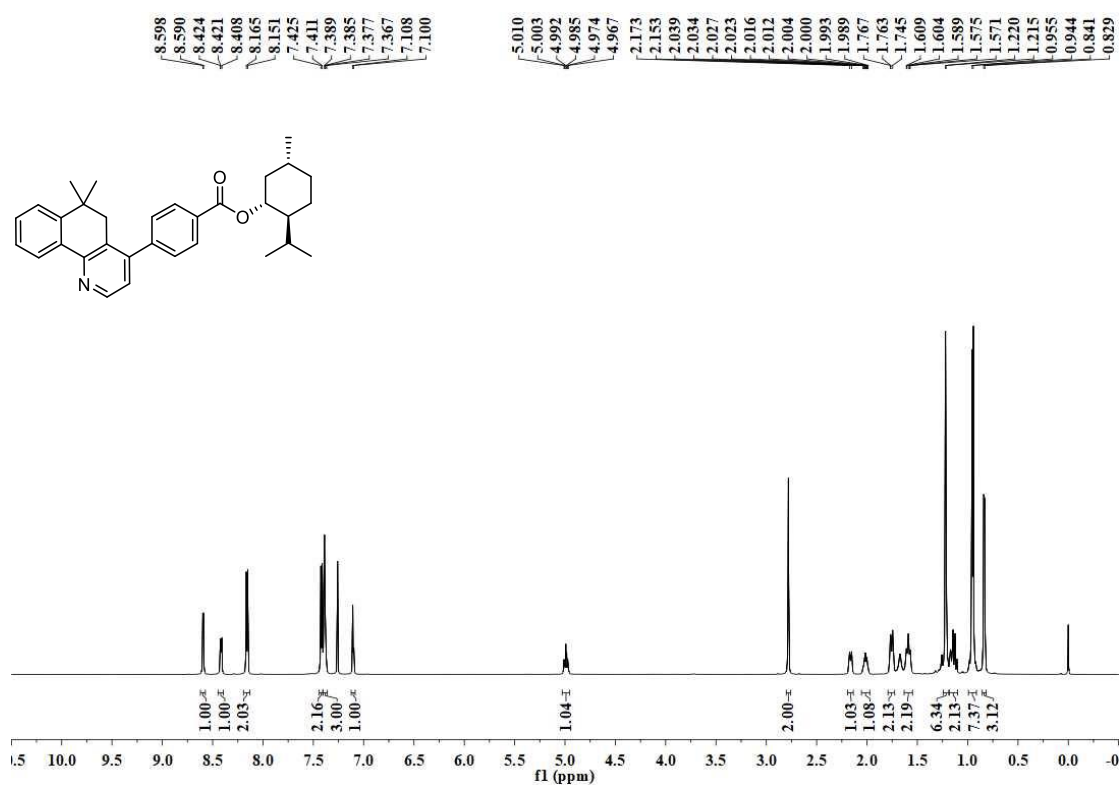

**<sup>13</sup>C NMR Spectrum of 60 (151 MHz, CDCl<sub>3</sub>)**

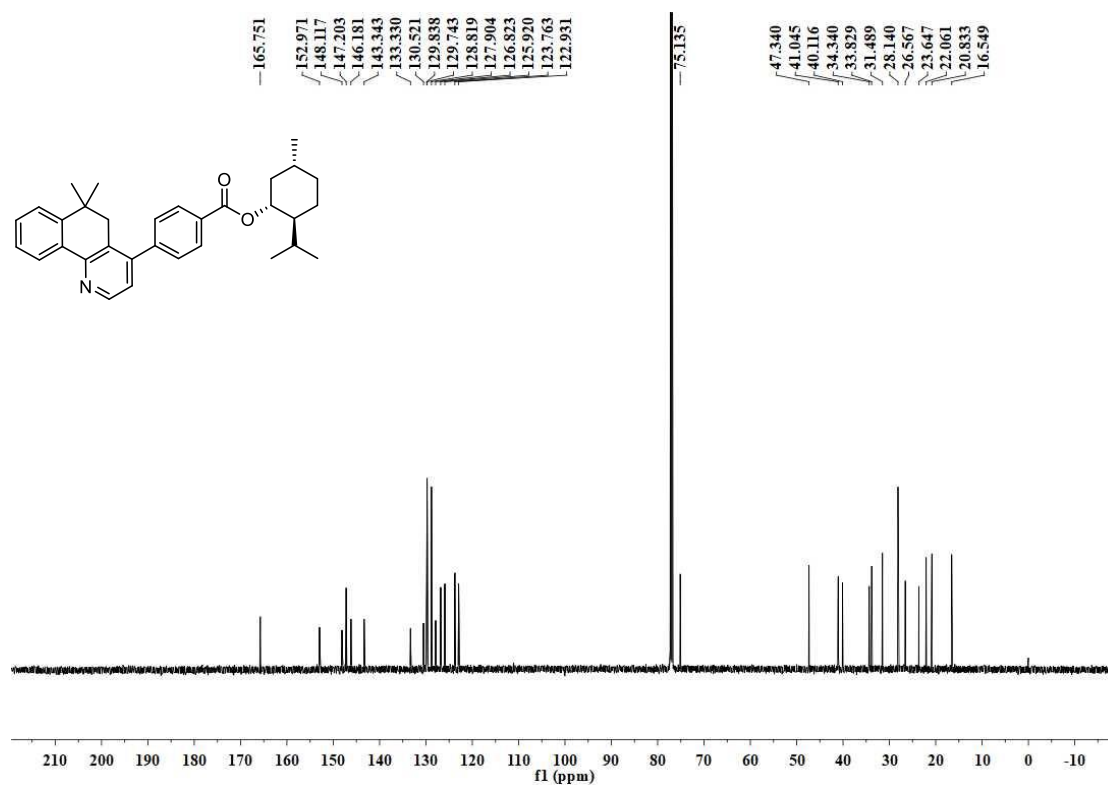

**<sup>1</sup>H NMR Spectrum of 61 (600 MHz, CDCl<sub>3</sub>)**

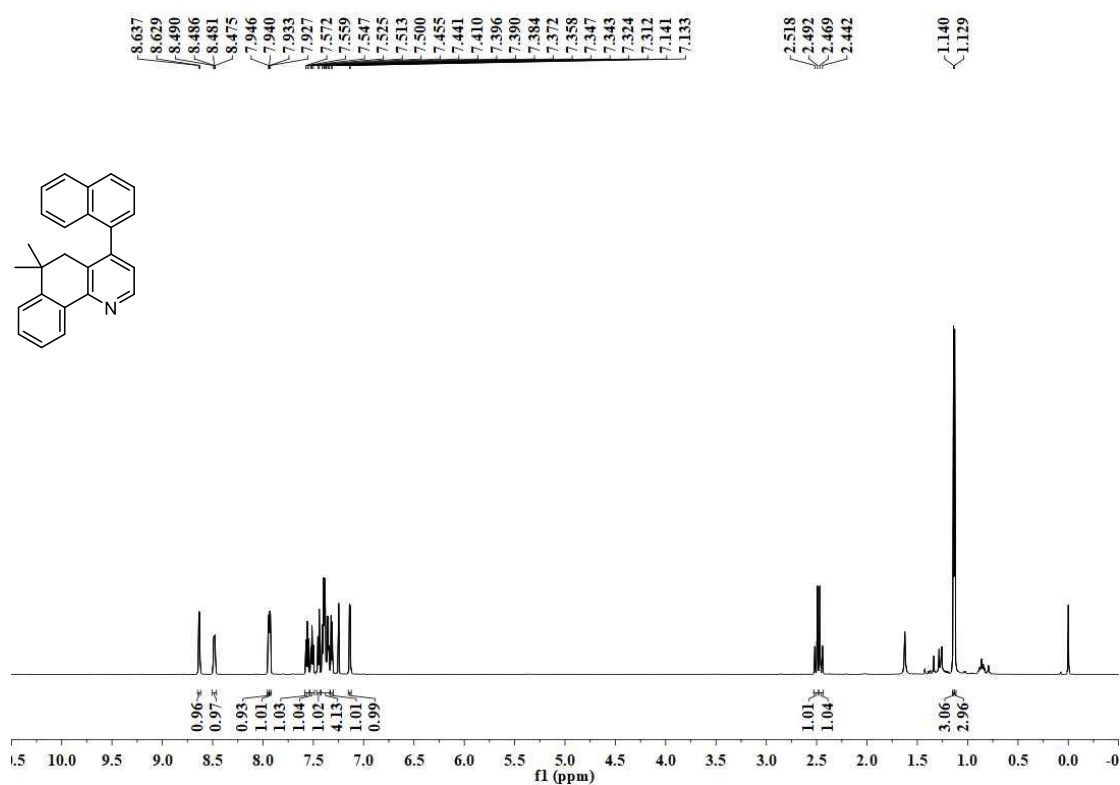

**$^{13}\text{C}$  NMR Spectrum of 61 (151 MHz,  $\text{CDCl}_3$ )**

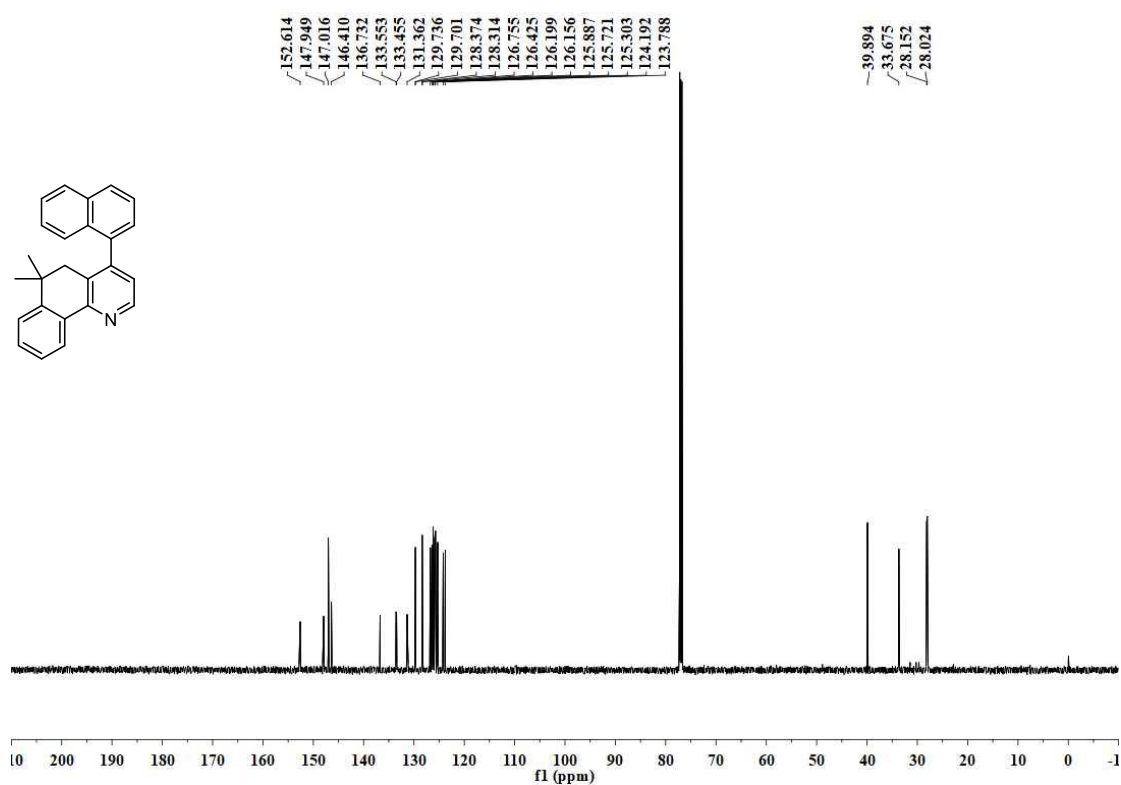

**$^1\text{H}$  NMR Spectrum of 62 (600 MHz,  $\text{CDCl}_3$ )**

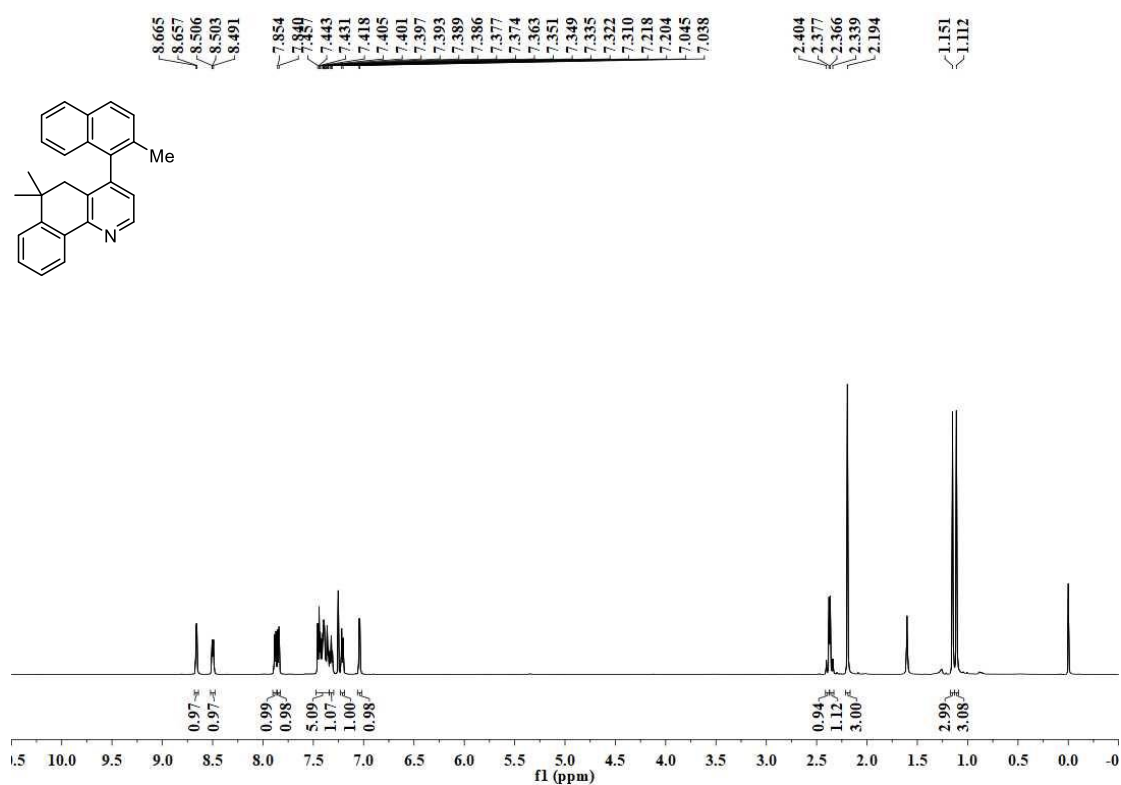

**$^{13}\text{C}$  NMR Spectrum of 62 (151 MHz,  $\text{CDCl}_3$ )**

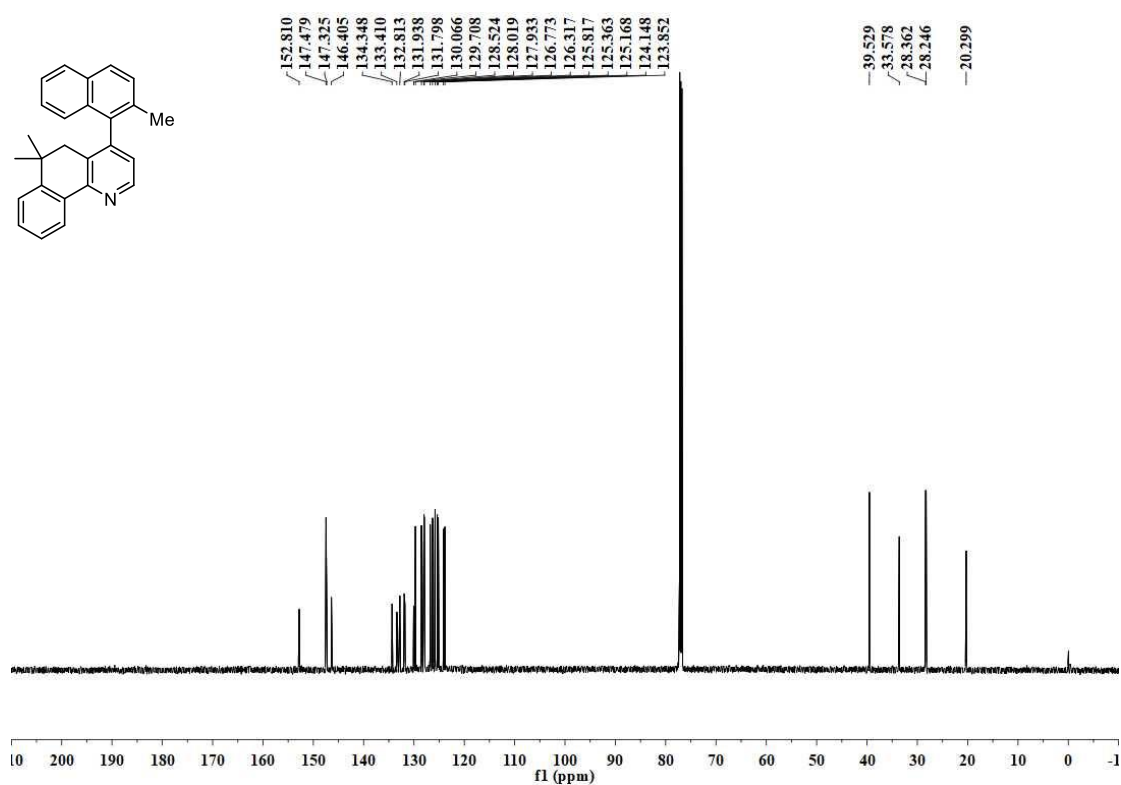

**$^1\text{H}$  NMR Spectrum of 63 (600 MHz,  $\text{CDCl}_3$ )**

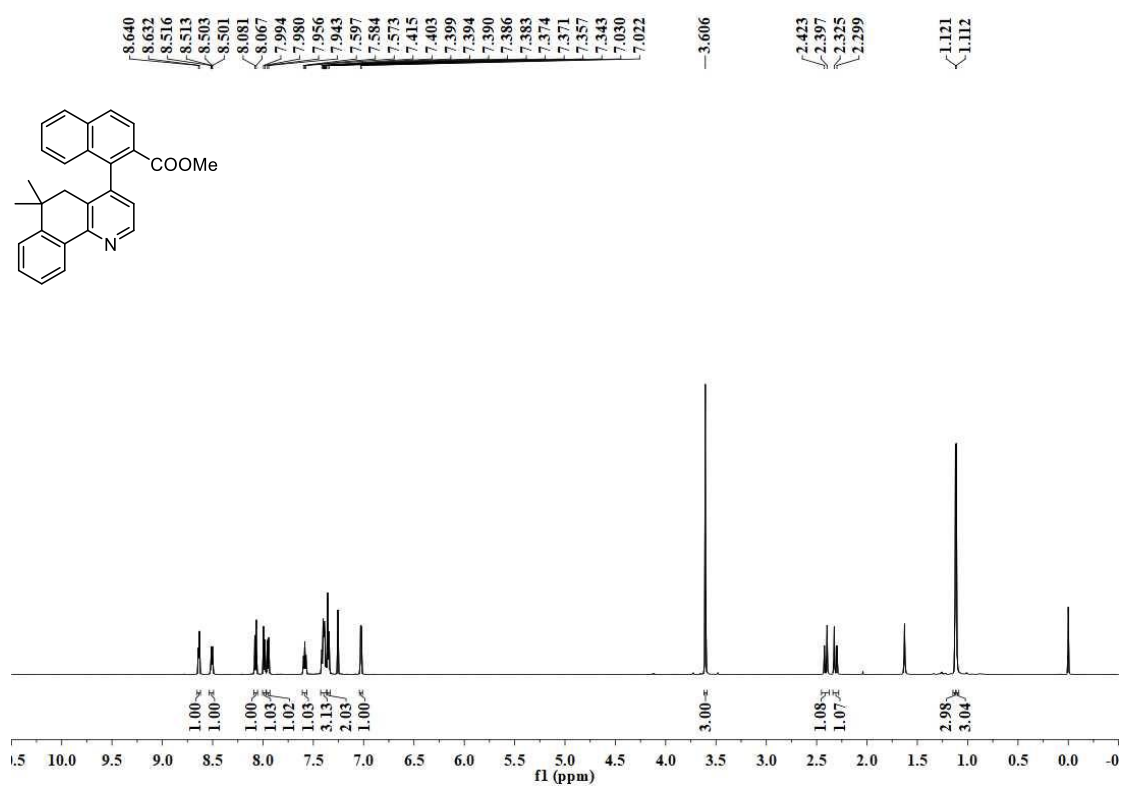

**<sup>13</sup>C NMR Spectrum of 63 (151 MHz, CDCl<sub>3</sub>)**

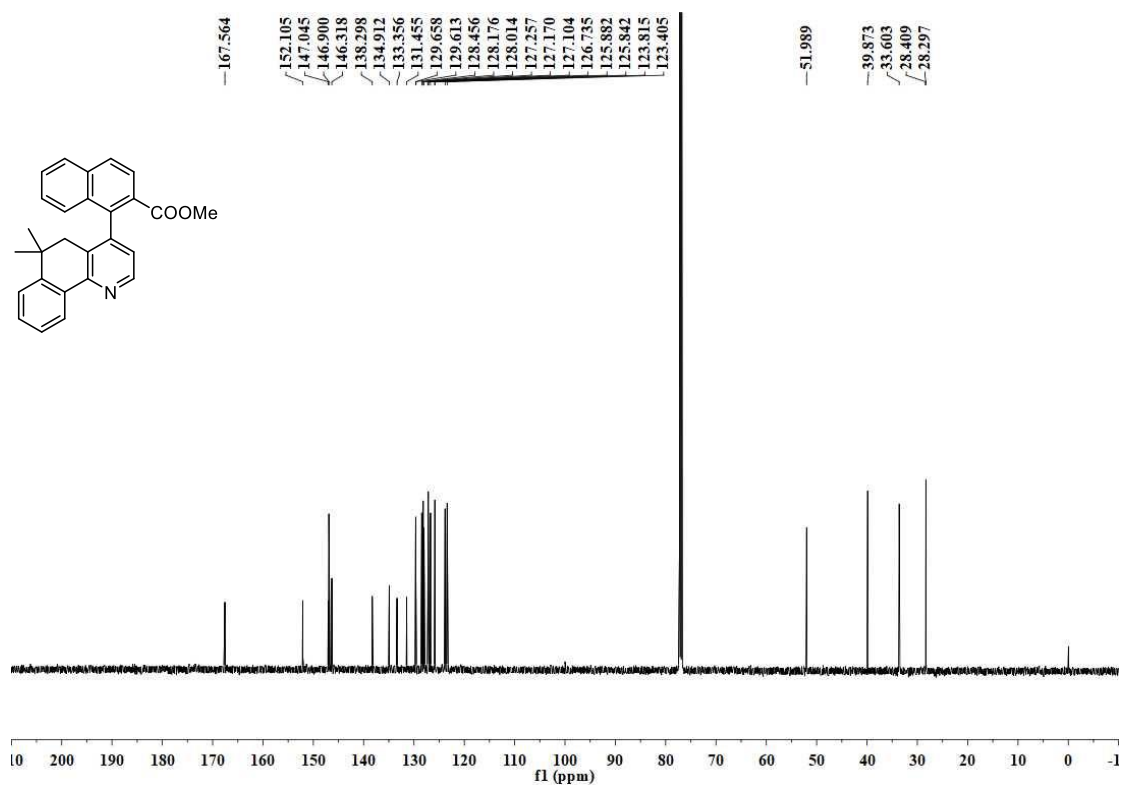

**<sup>1</sup>H NMR Spectrum of 64 (600 MHz, CDCl<sub>3</sub>)**

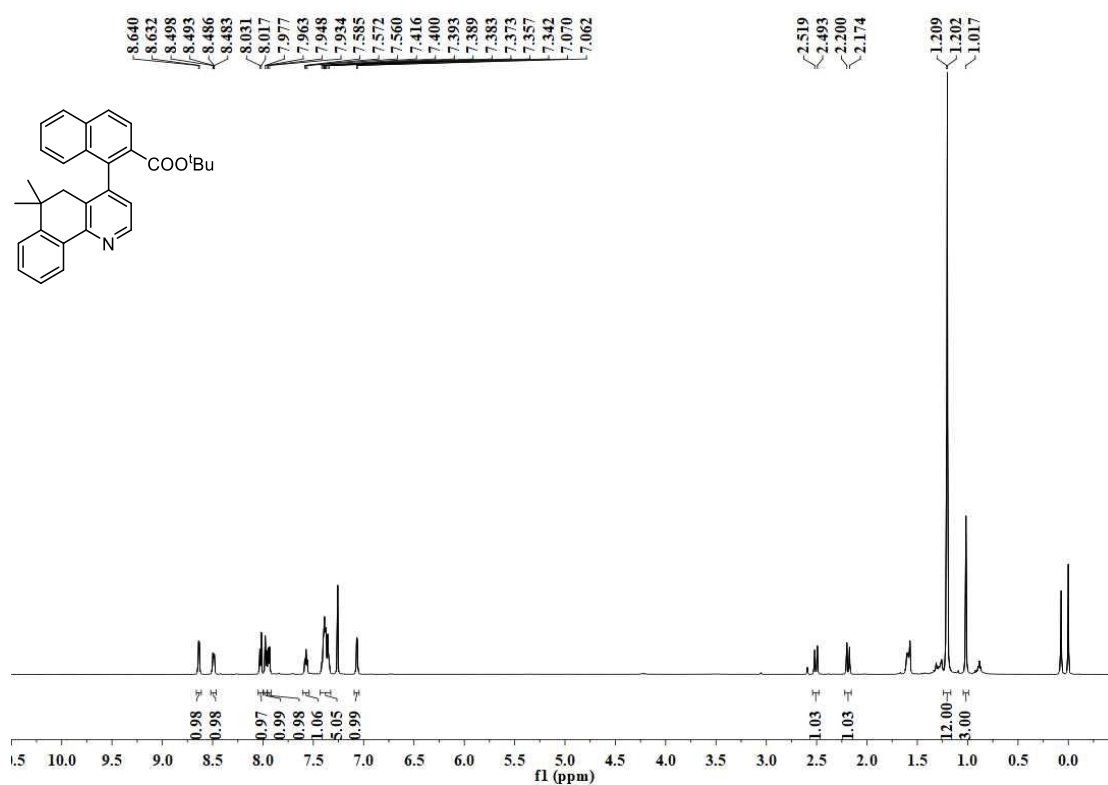



**$^{13}\text{C}$  NMR Spectrum of **64** (151 MHz,  $\text{CDCl}_3$ )**

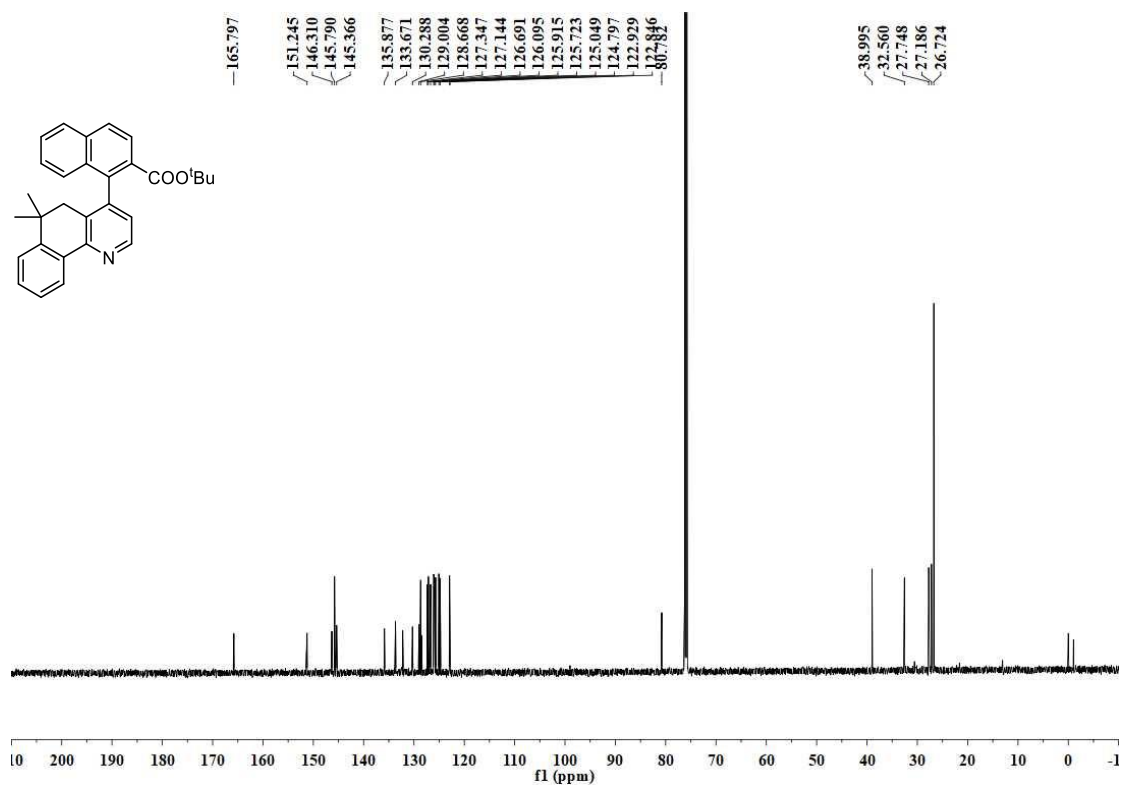

**$^1\text{H}$  NMR Spectrum of **98** (600 MHz,  $\text{CDCl}_3$ )**

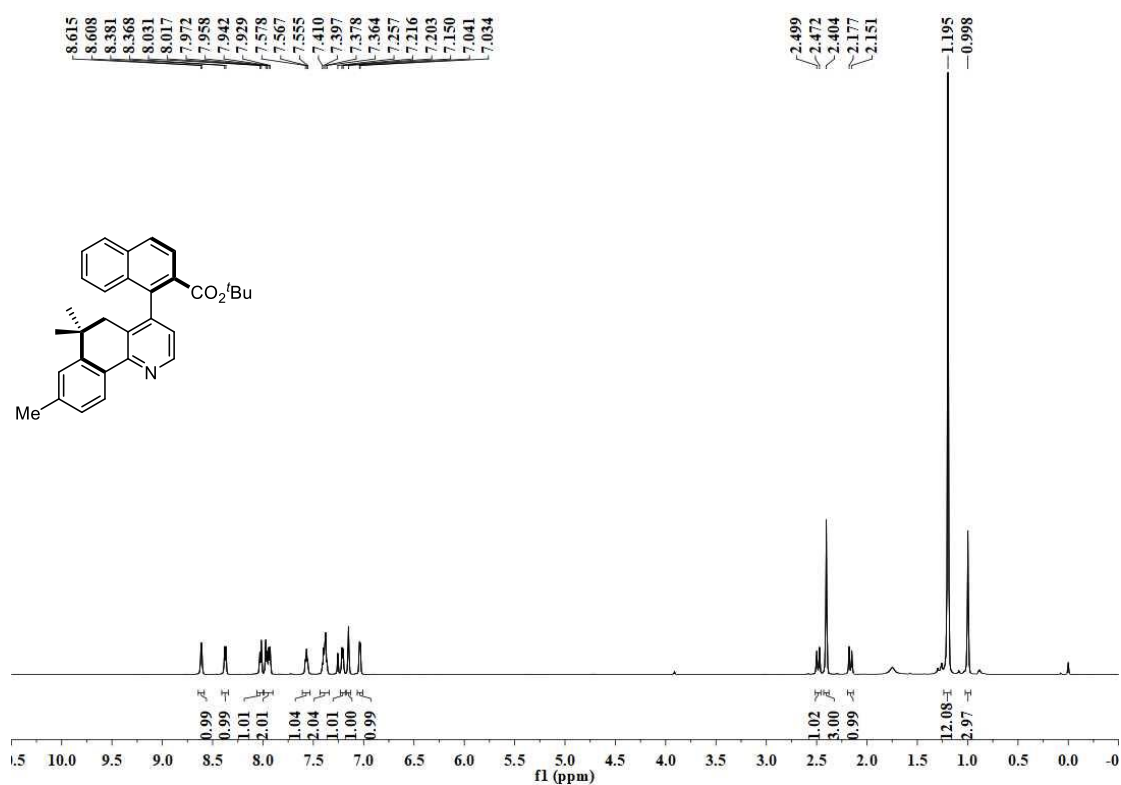

**<sup>13</sup>C NMR Spectrum of 98 (151 MHz, CDCl<sub>3</sub>)**

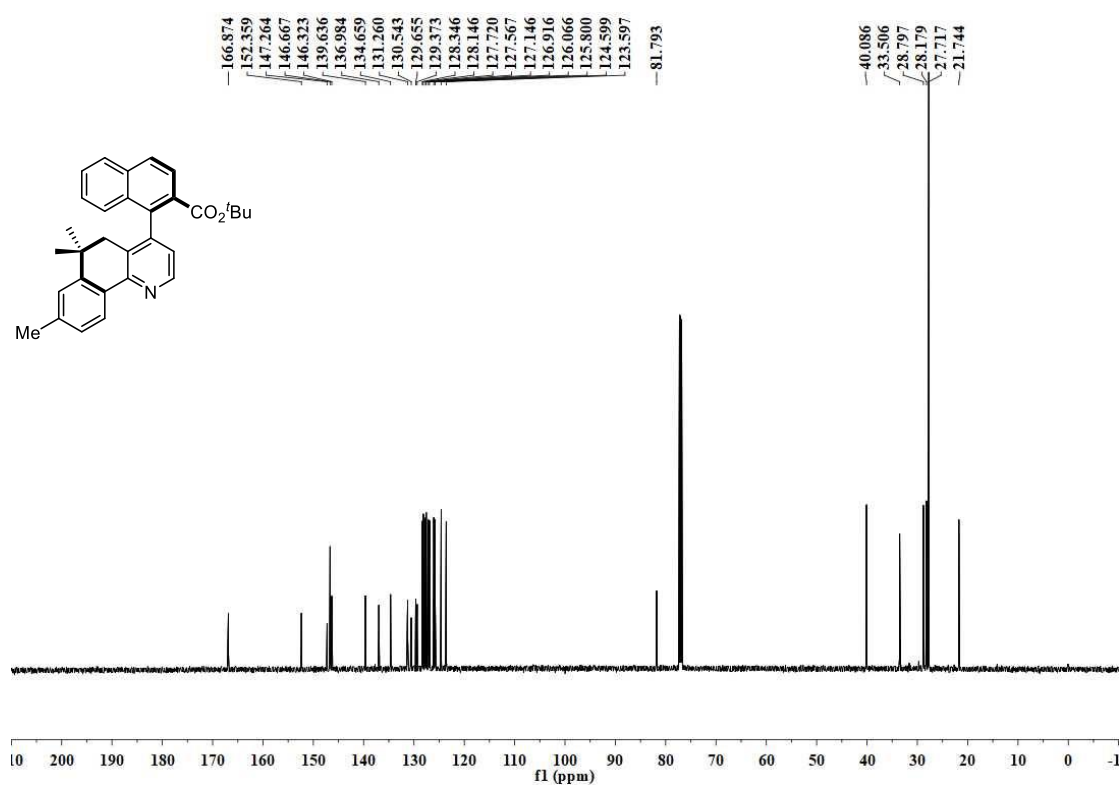

**<sup>1</sup>H NMR Spectrum of 99 (600 MHz, CDCl<sub>3</sub>)**

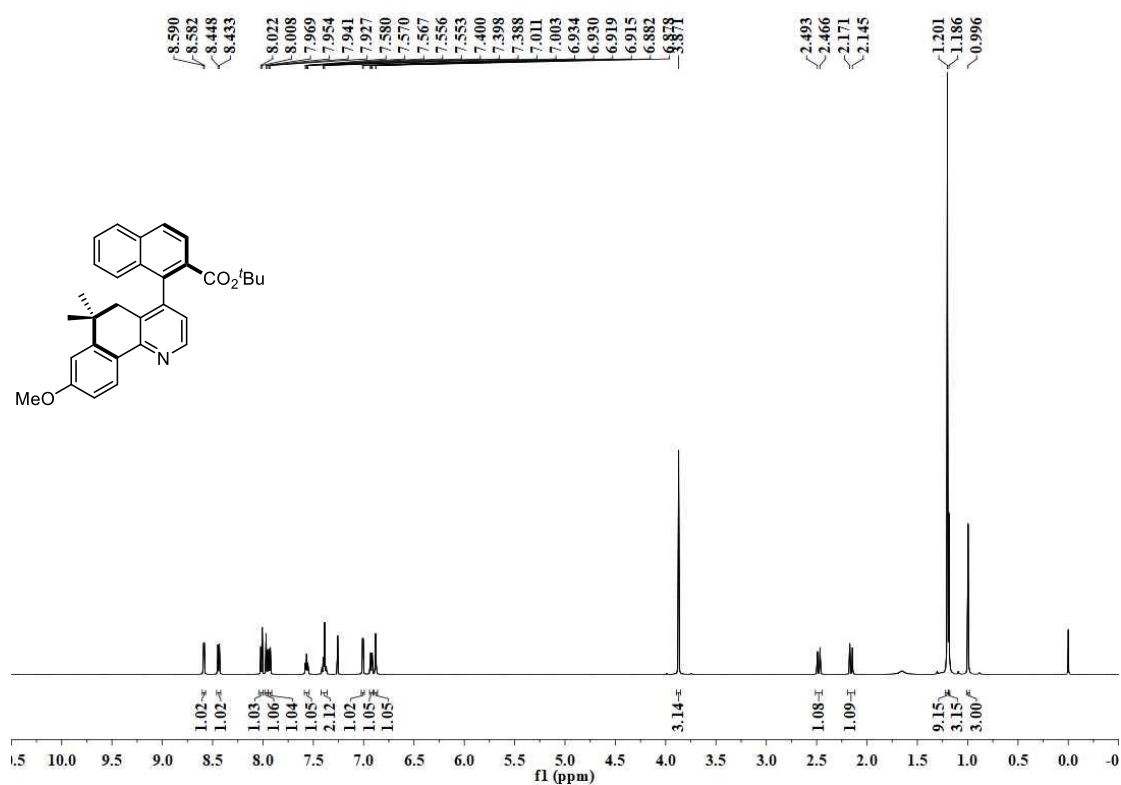

**$^{13}\text{C}$  NMR Spectrum of **99** (151 MHz,  $\text{CDCl}_3$ )**

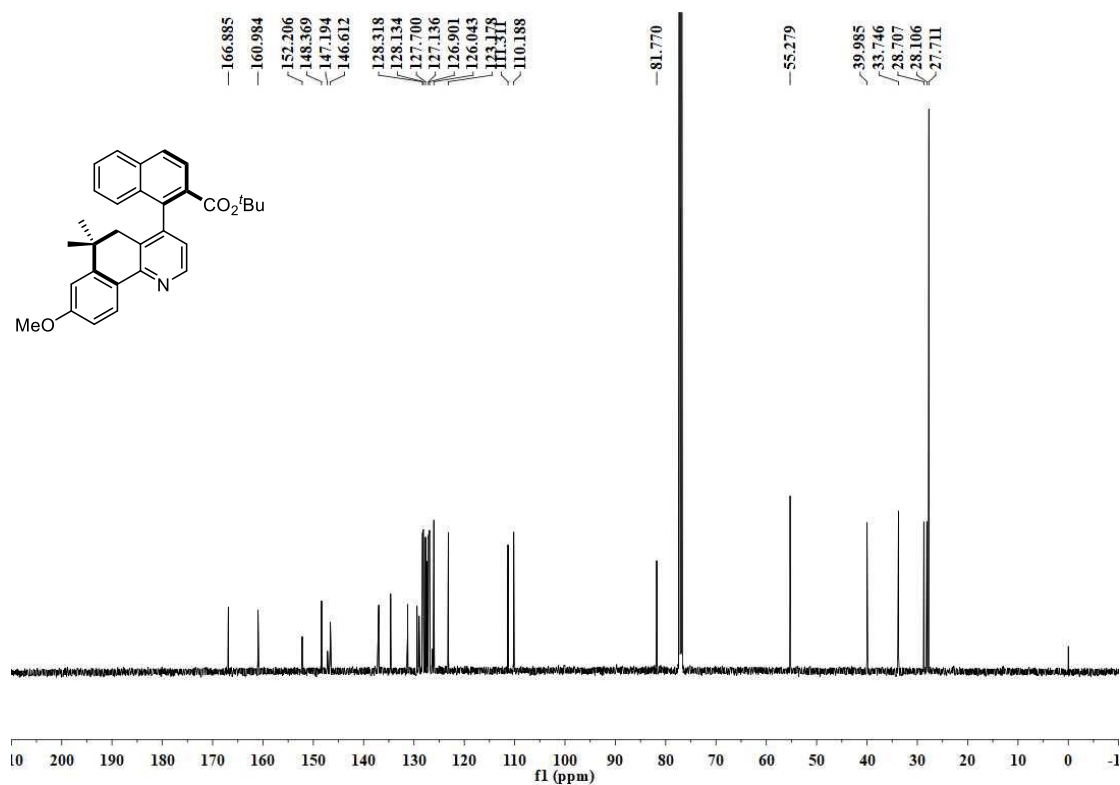

**$^1\text{H}$  NMR Spectrum of **100** (600 MHz,  $\text{CDCl}_3$ )**

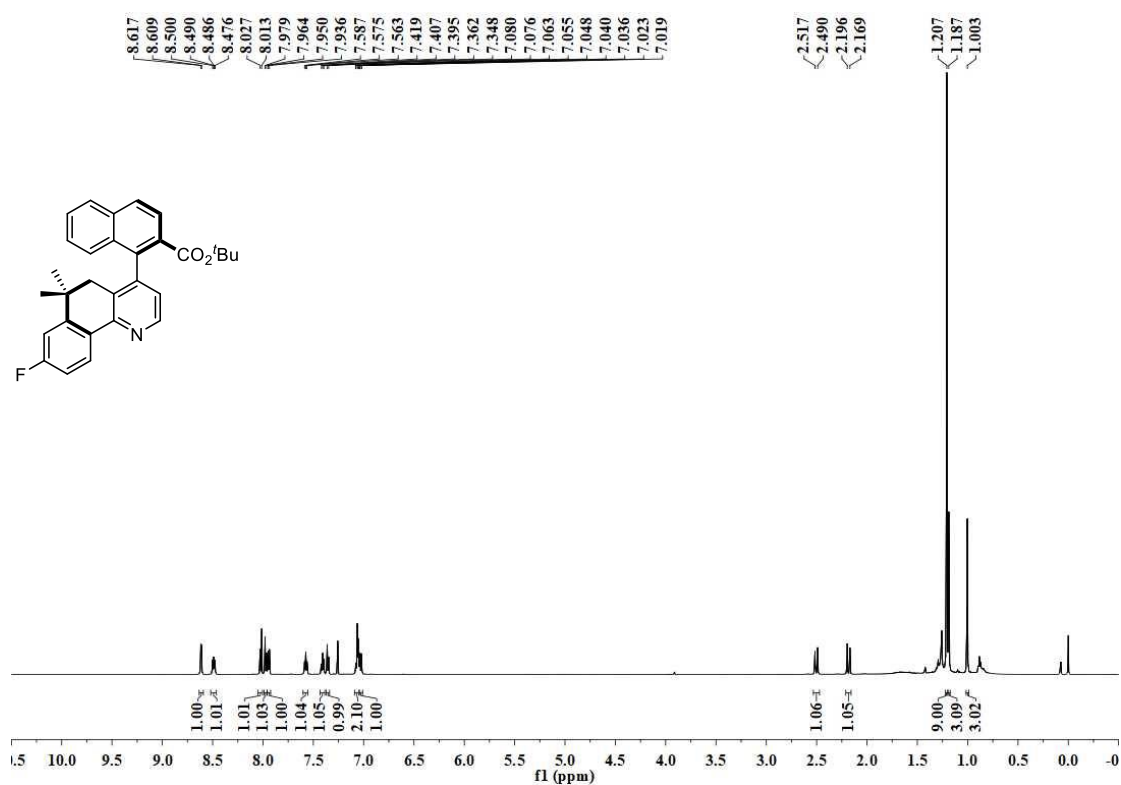

**$^{13}\text{C}$  NMR Spectrum of 100 (151 MHz,  $\text{CDCl}_3$ )**

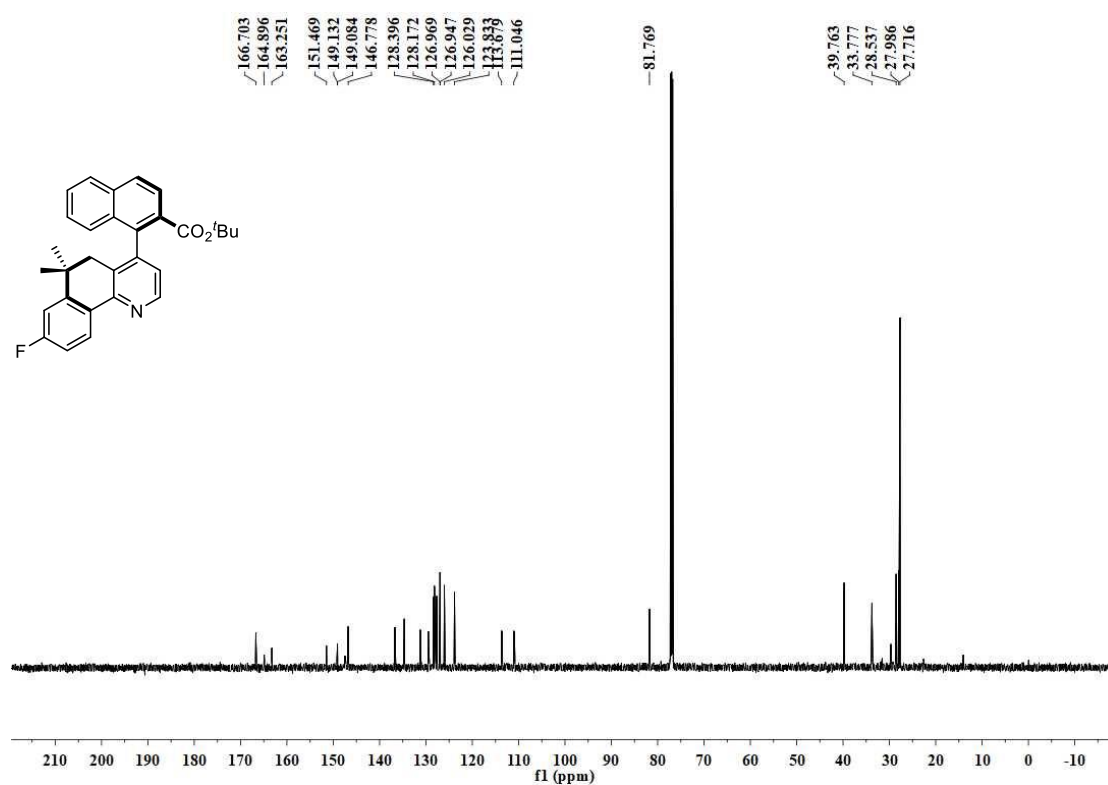

**$^{19}\text{F}$  NMR Spectrum of 100 (565 MHz,  $\text{CDCl}_3$ )**

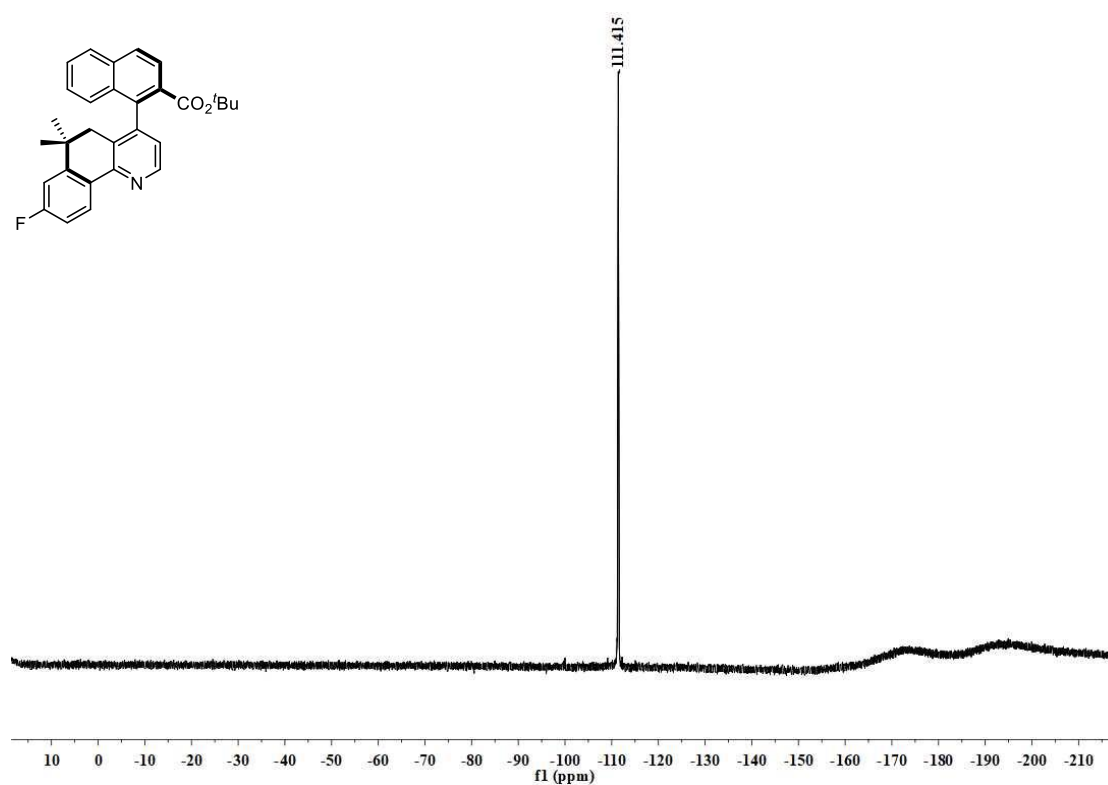

**<sup>1</sup>H NMR Spectrum of 101 (600 MHz, CDCl<sub>3</sub>)**

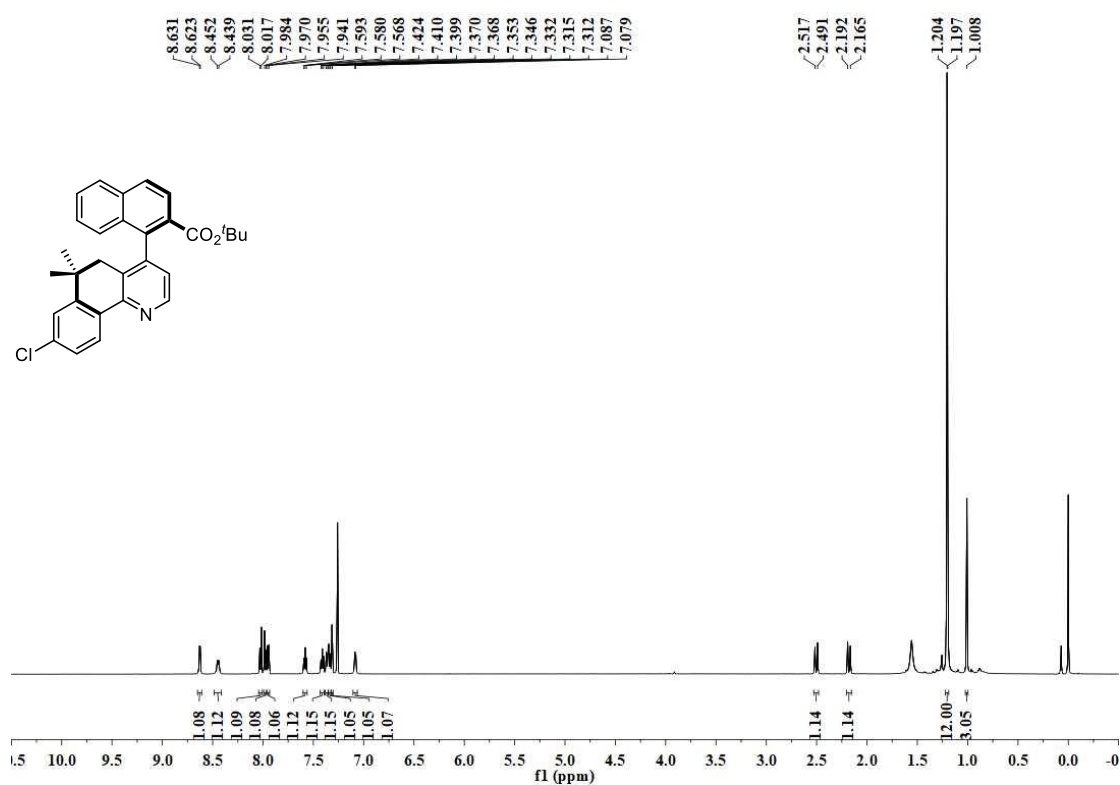

**<sup>13</sup>C NMR Spectrum of 101 (151 MHz, CDCl<sub>3</sub>)**

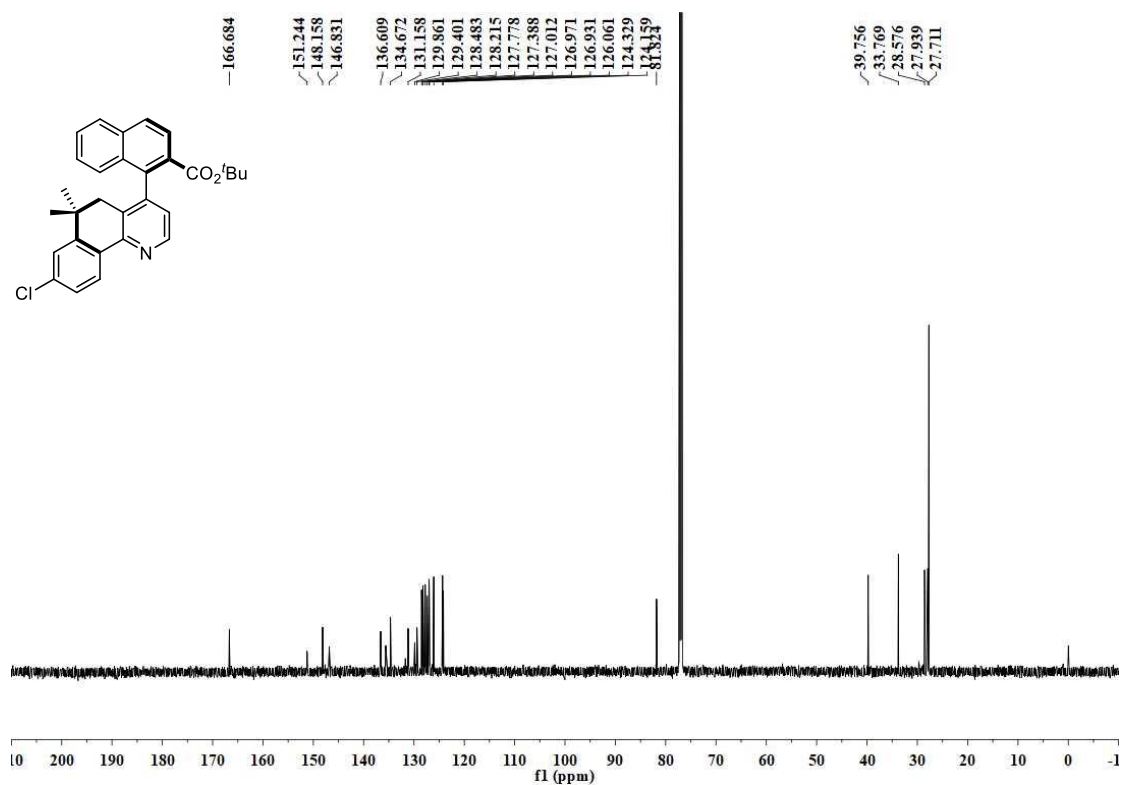

**<sup>1</sup>H NMR Spectrum of 102 (600 MHz, CDCl<sub>3</sub>)**

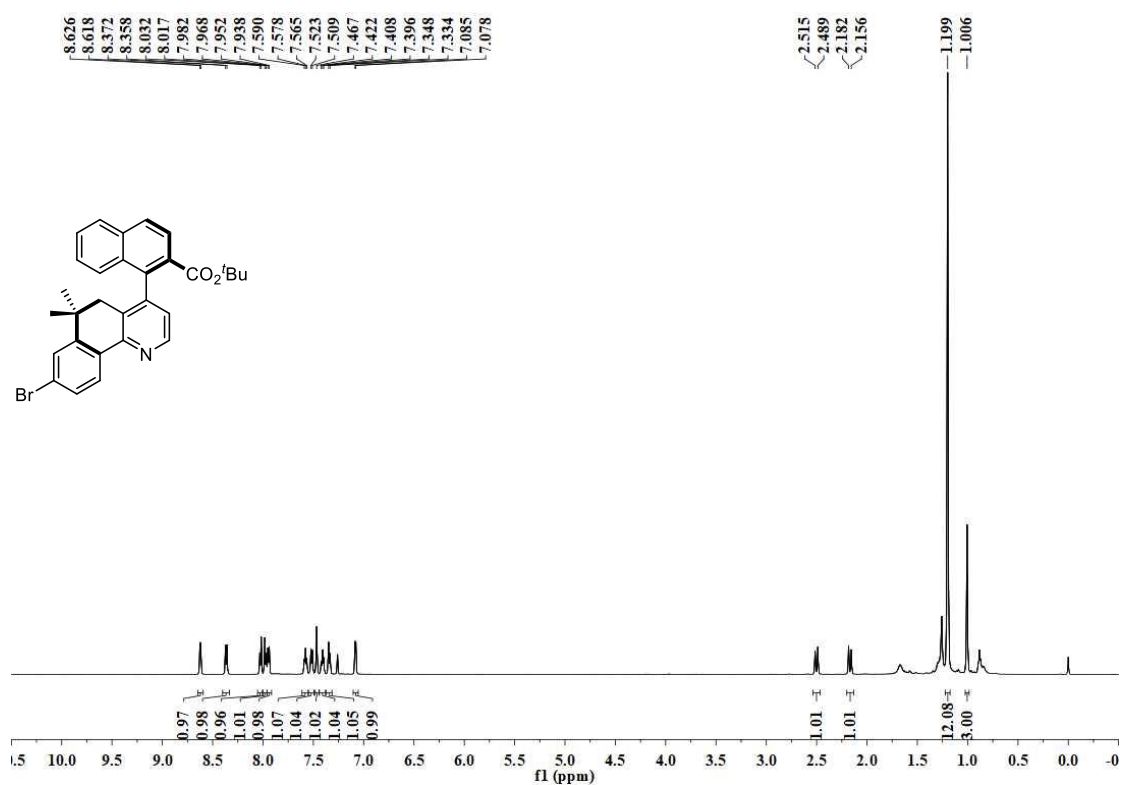

**<sup>13</sup>C NMR Spectrum of 102 (151 MHz, CDCl<sub>3</sub>)**

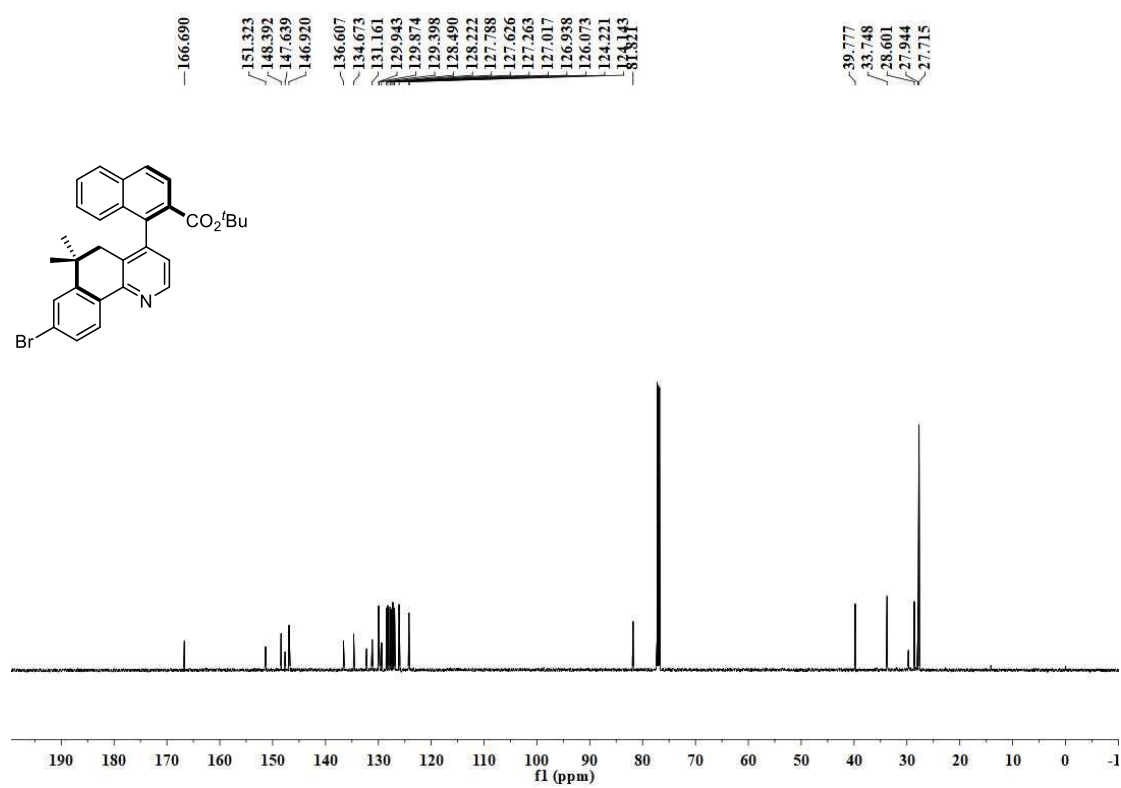

**<sup>1</sup>H NMR Spectrum of 103 (600 MHz, CDCl<sub>3</sub>)**

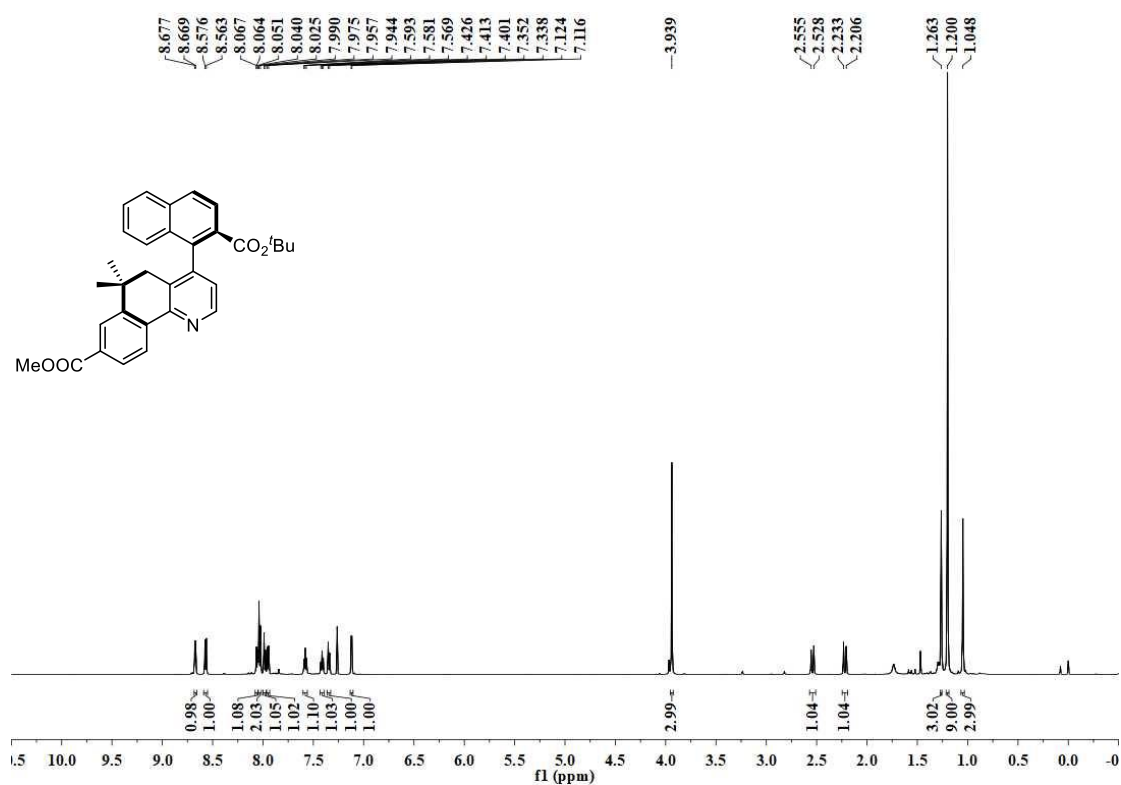

**<sup>13</sup>C NMR Spectrum of 103 (151 MHz, CDCl<sub>3</sub>)**

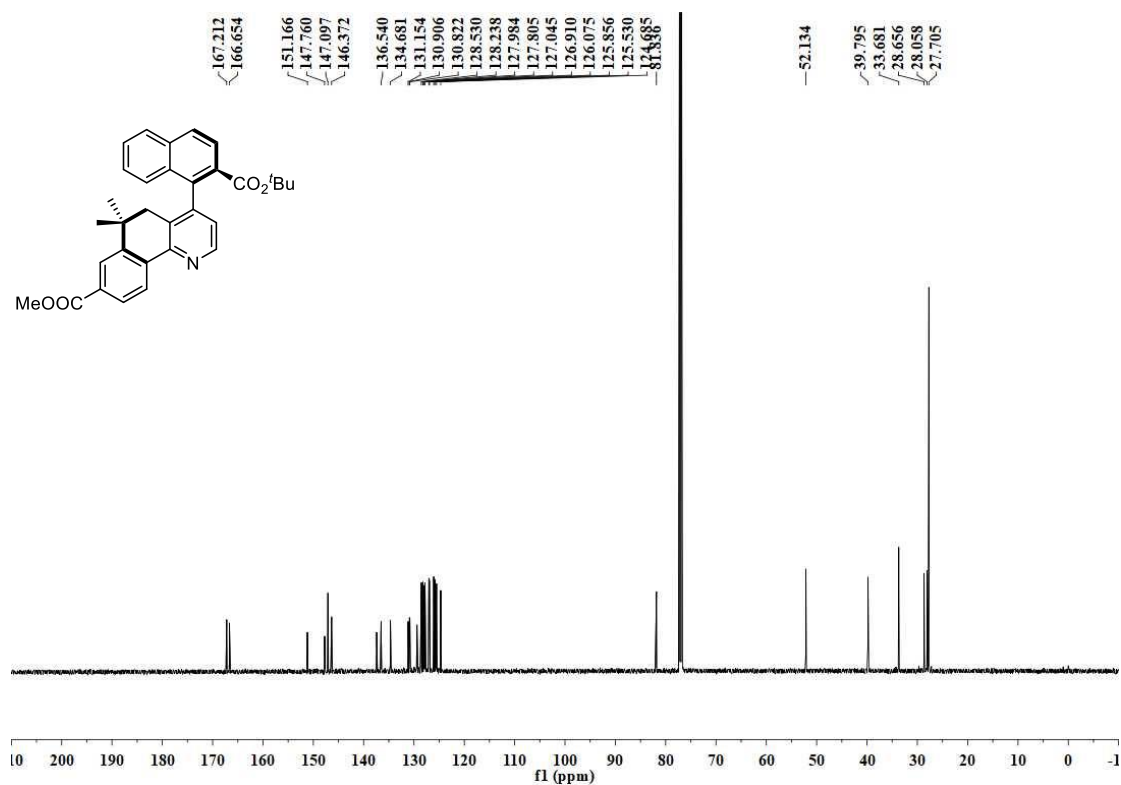

**<sup>1</sup>H NMR Spectrum of 104 (600 MHz, CDCl<sub>3</sub>)**

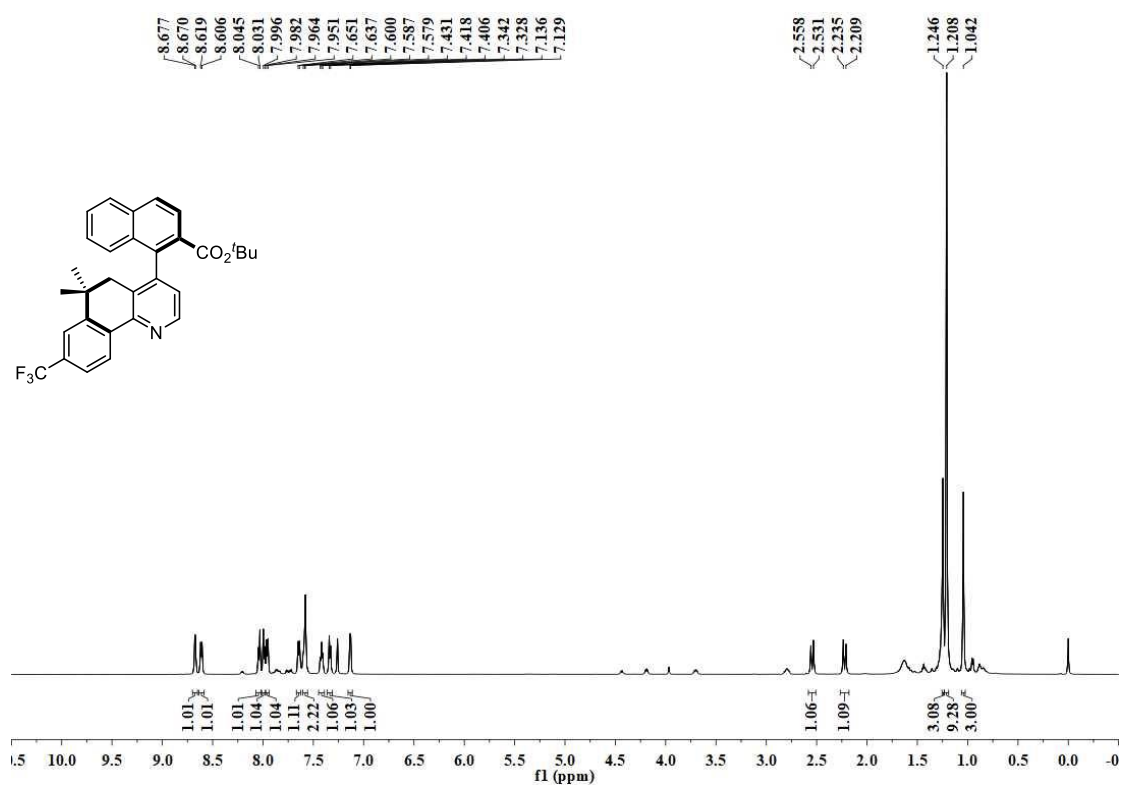

**<sup>13</sup>C NMR Spectrum of 104 (151 MHz, CDCl<sub>3</sub>)**

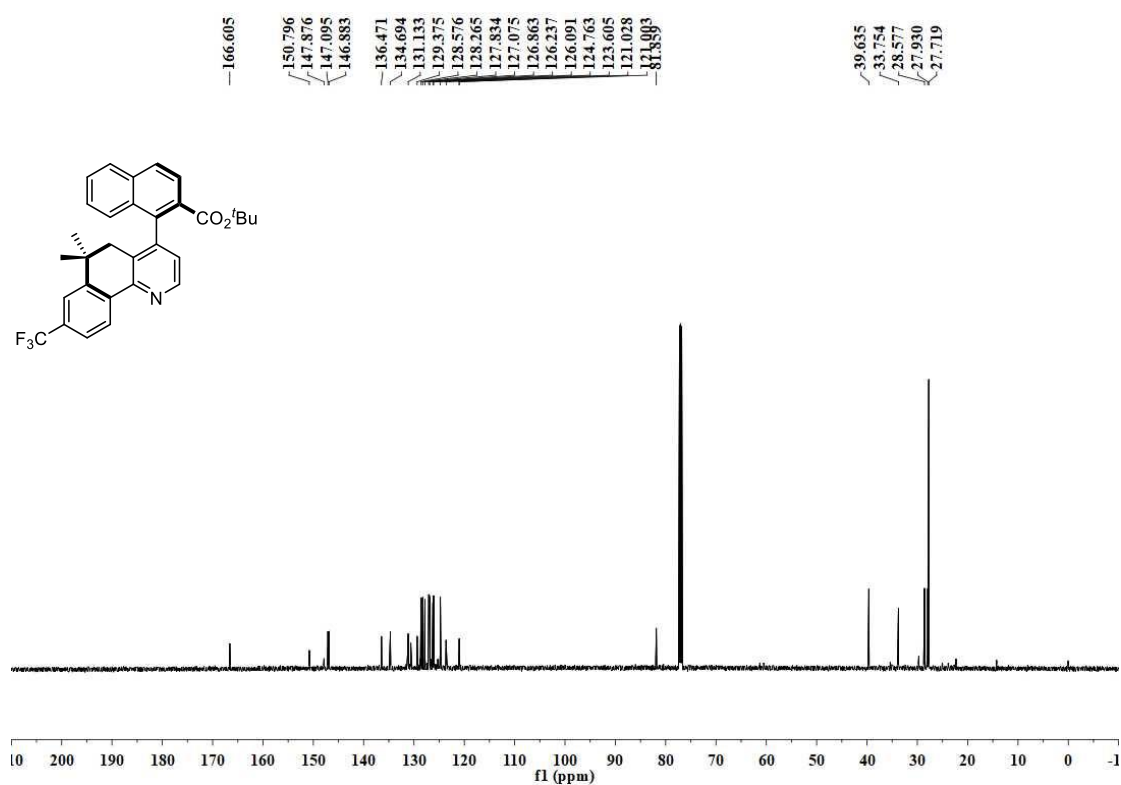



**$^{19}\text{F}$  NMR Spectrum of 104 (565 MHz,  $\text{CDCl}_3$ )**

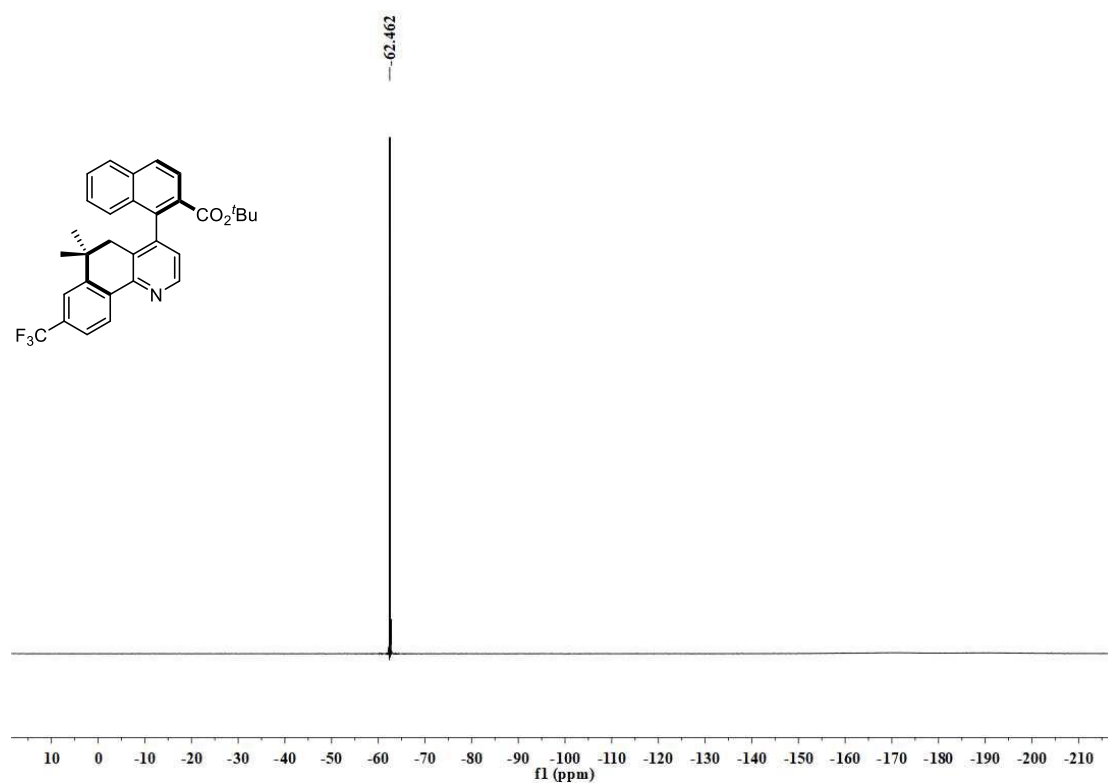

**$^1\text{H}$  NMR Spectrum of 105 (600 MHz,  $\text{CDCl}_3$ )**

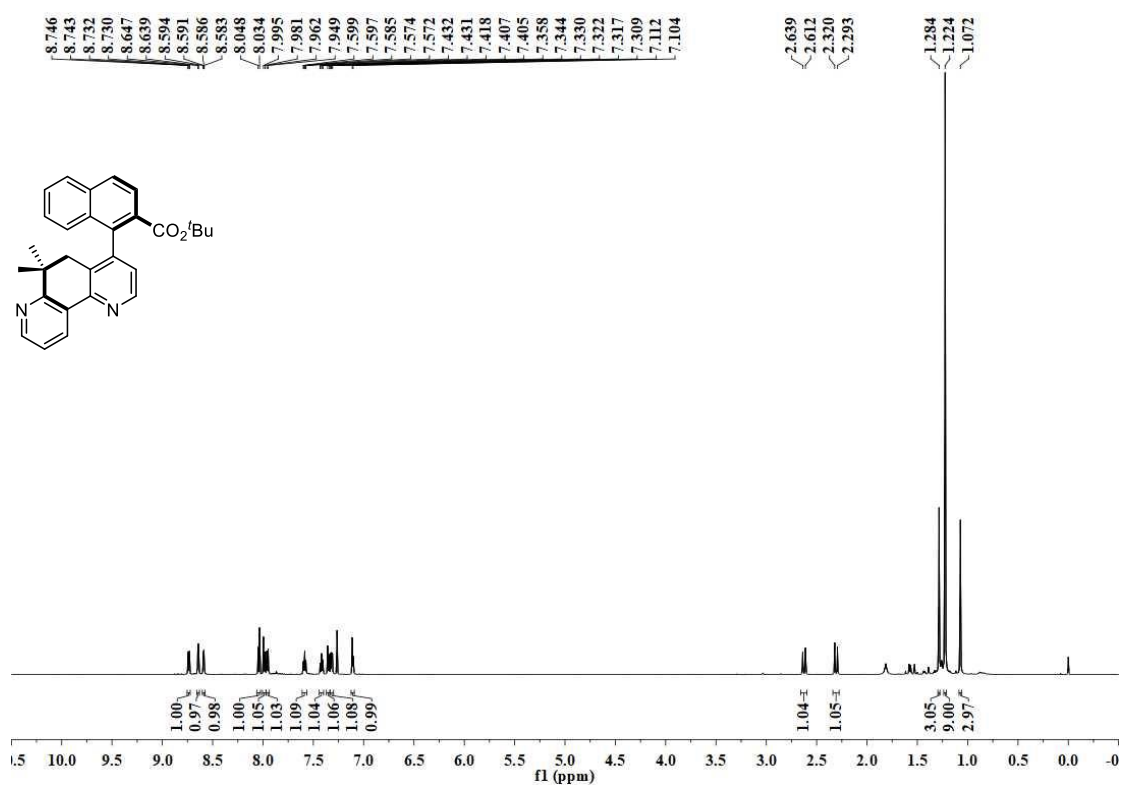

**<sup>13</sup>C NMR Spectrum of 105 (151 MHz, CDCl<sub>3</sub>)**

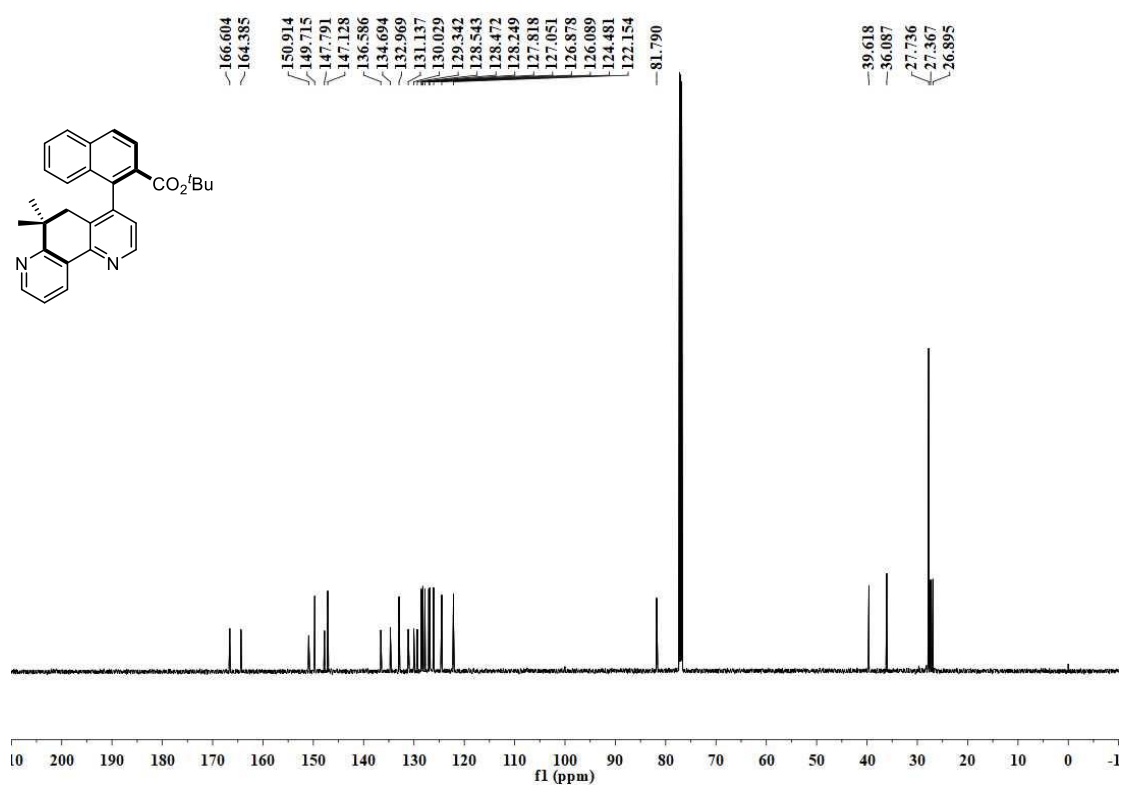

**<sup>1</sup>H NMR Spectrum of 106 (600 MHz, CDCl<sub>3</sub>)**

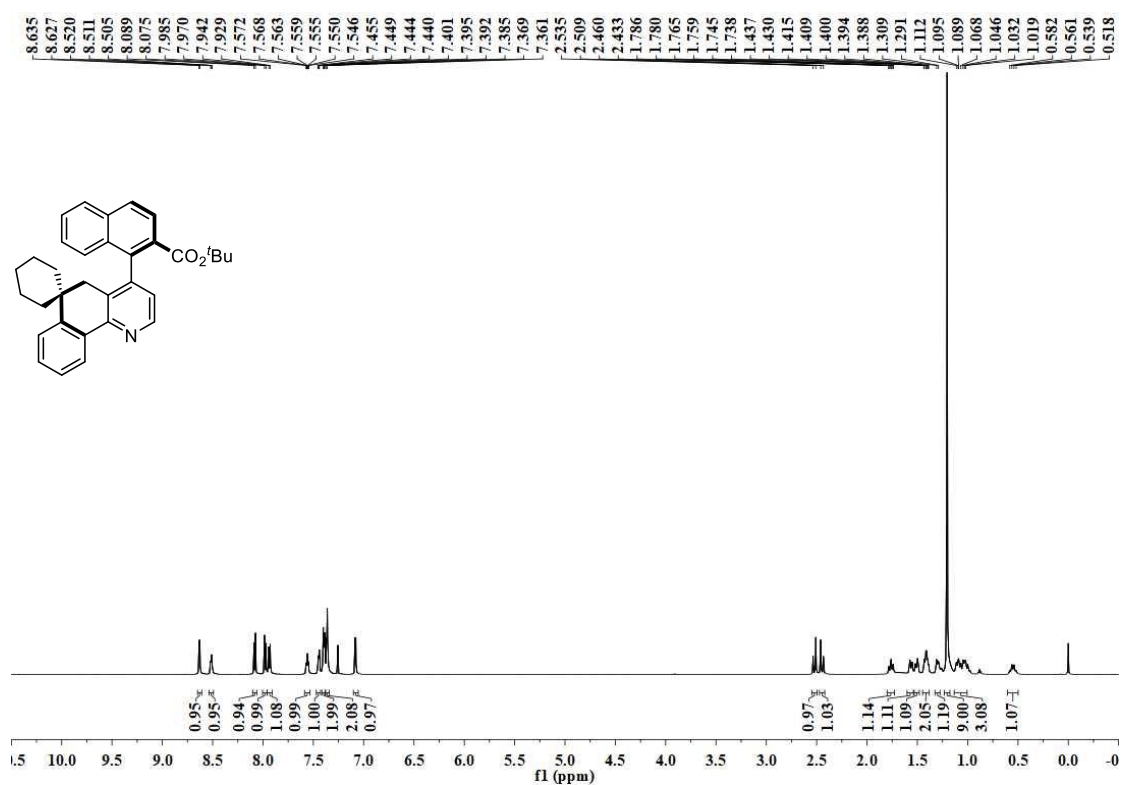

**$^{13}\text{C}$  NMR Spectrum of 106 (151 MHz,  $\text{CDCl}_3$ )**

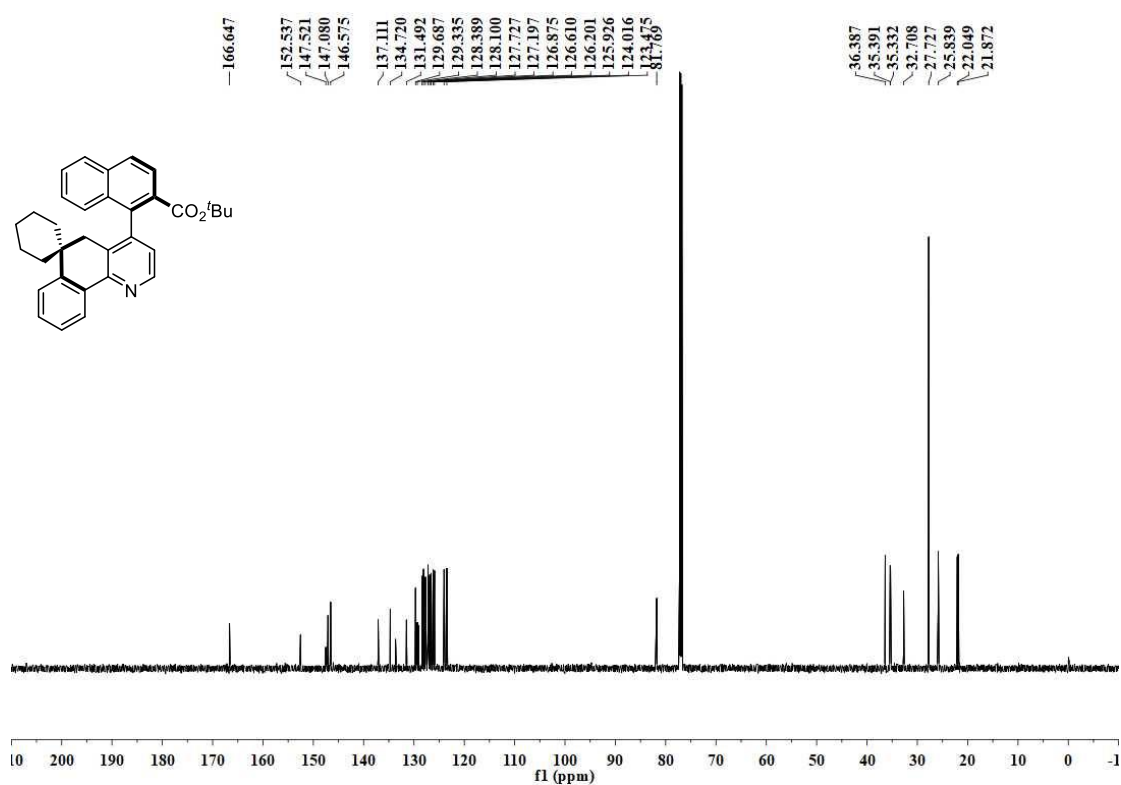

**$^1\text{H}$  NMR Spectrum of 107 (600 MHz,  $\text{CDCl}_3$ )**

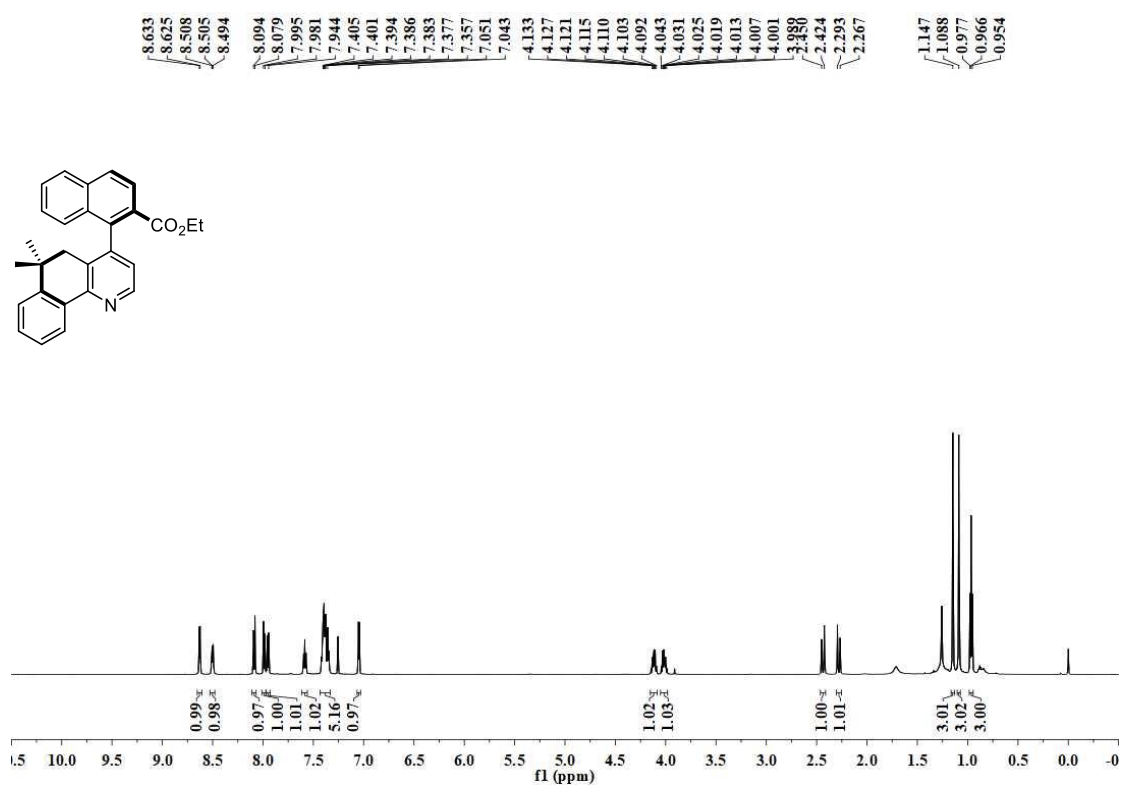

**$^{13}\text{C}$  NMR Spectrum of 107 (151 MHz,  $\text{CDCl}_3$ )**

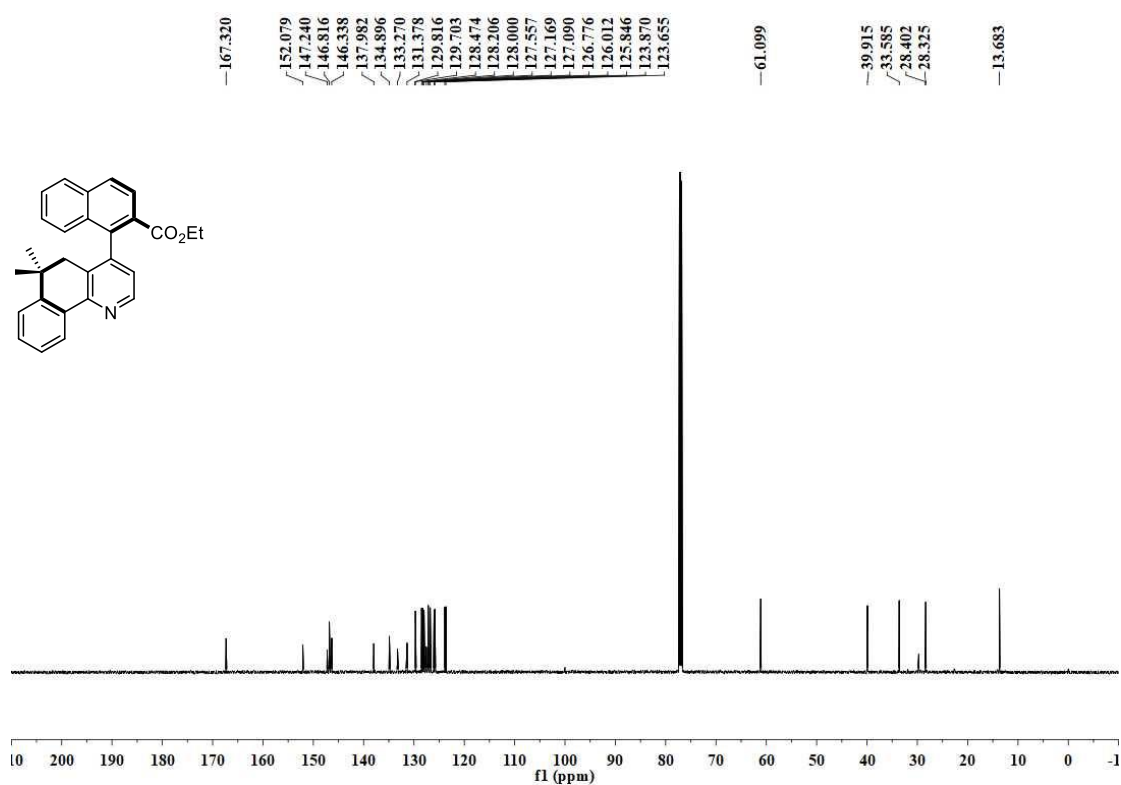

**$^1\text{H}$  NMR Spectrum of 108 (600 MHz,  $\text{CDCl}_3$ )**

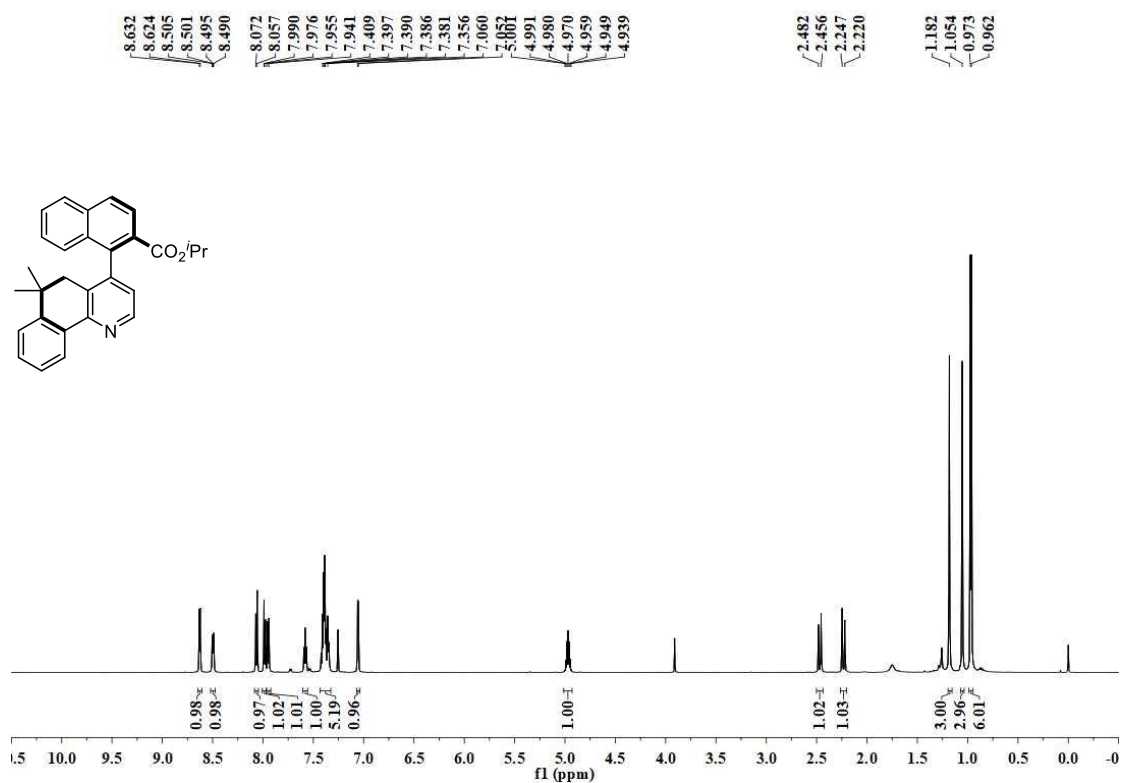

**<sup>13</sup>C NMR Spectrum of 108 (151 MHz, CDCl<sub>3</sub>)**

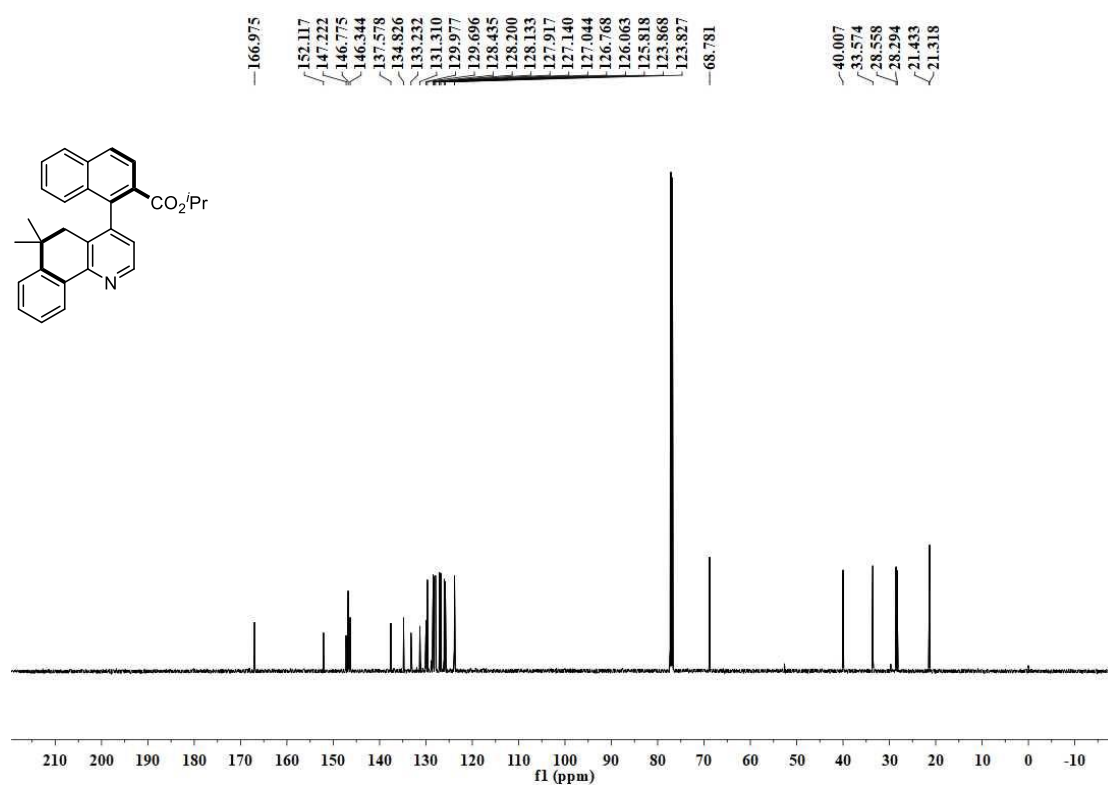

**<sup>1</sup>H NMR Spectrum of 109 (600 MHz, CDCl<sub>3</sub>)**

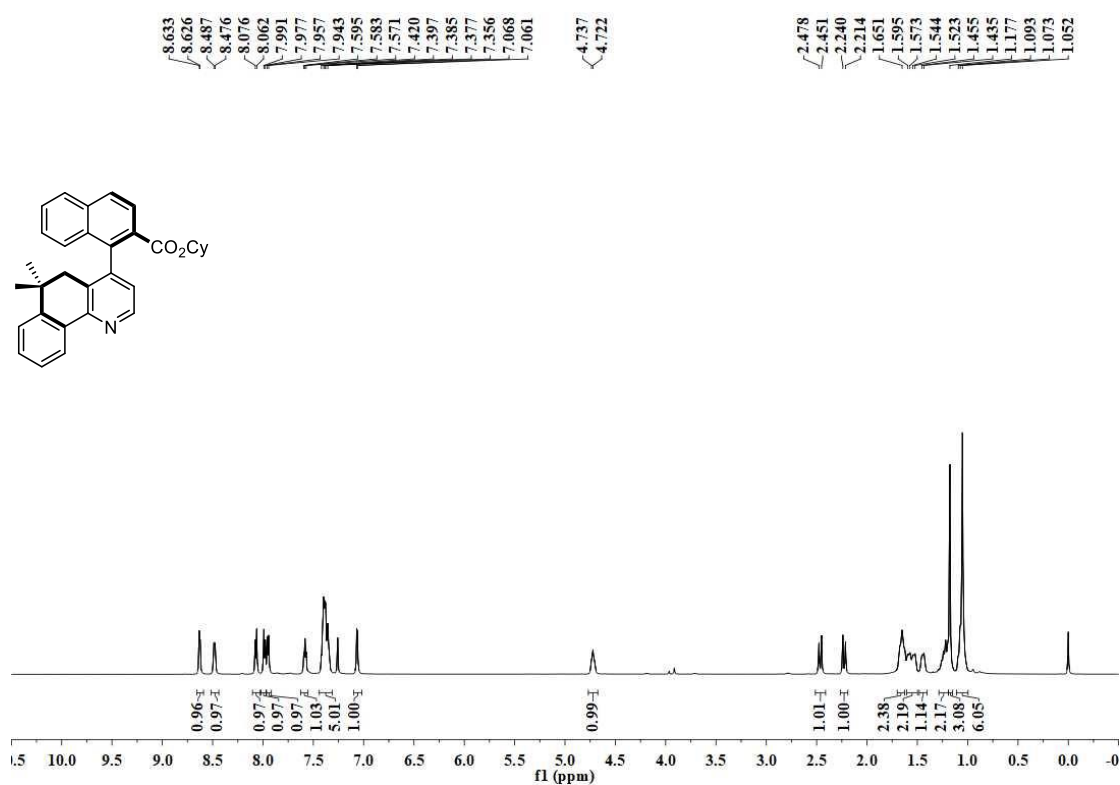

**<sup>13</sup>C NMR Spectrum of 109 (151 MHz, CDCl<sub>3</sub>)**

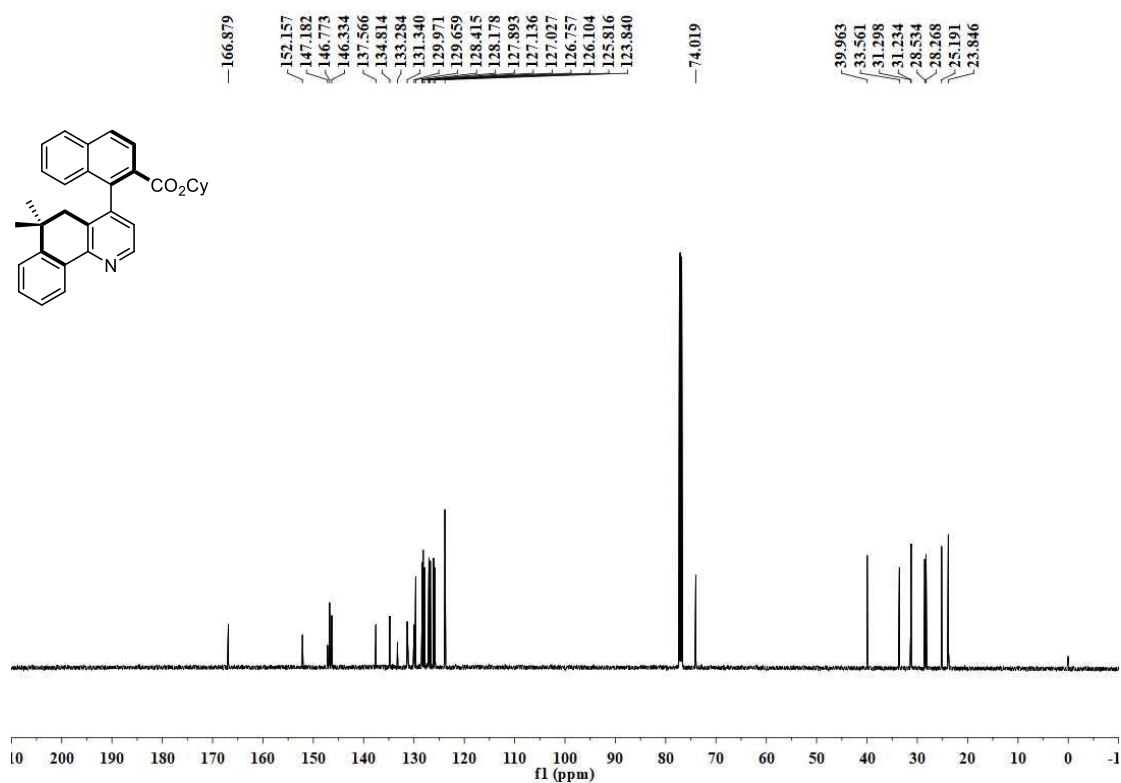

**<sup>1</sup>H NMR Spectrum of 110 (600 MHz, CDCl<sub>3</sub>)**

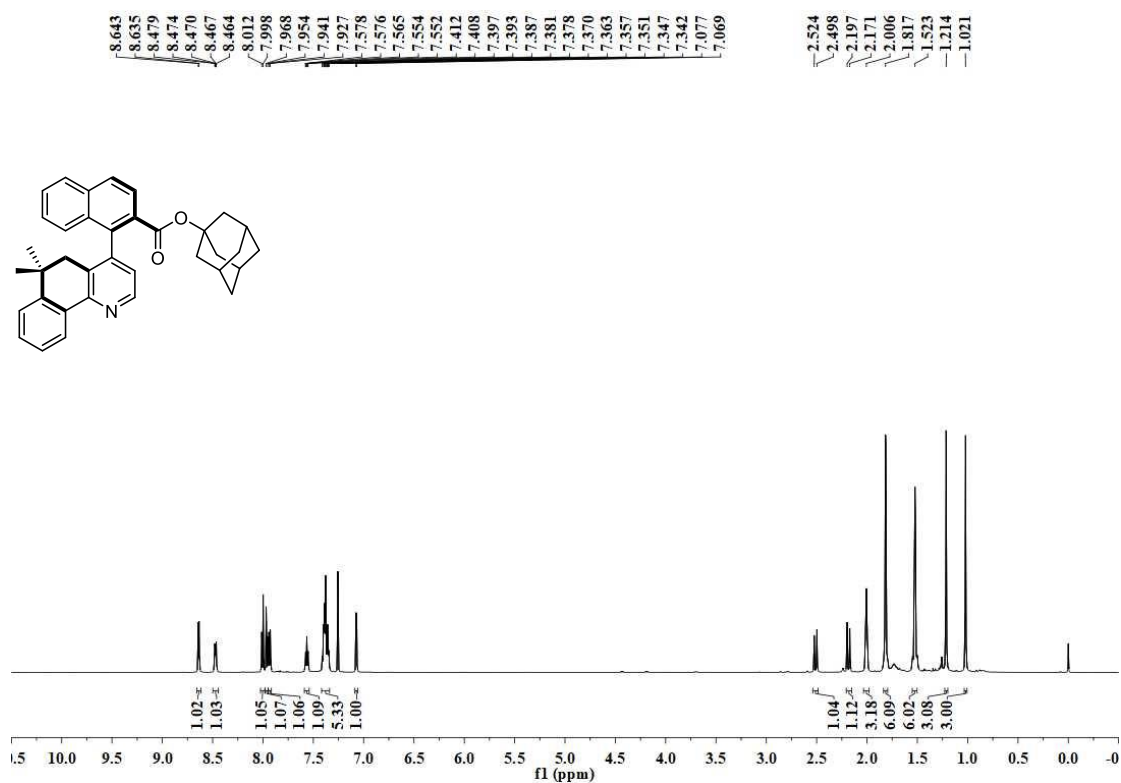

**$^{13}\text{C}$  NMR Spectrum of 110 (151 MHz,  $\text{CDCl}_3$ )**

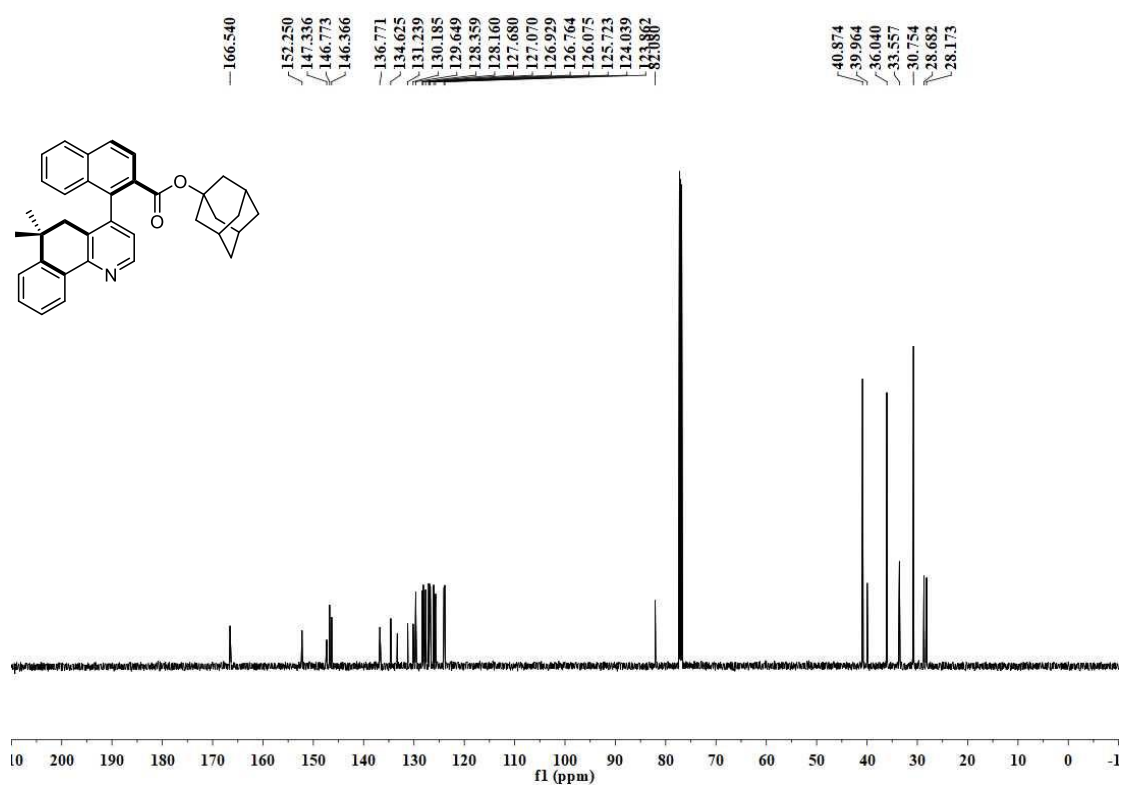

**$^1\text{H}$  NMR Spectrum of 111 (600 MHz,  $\text{CDCl}_3$ )**

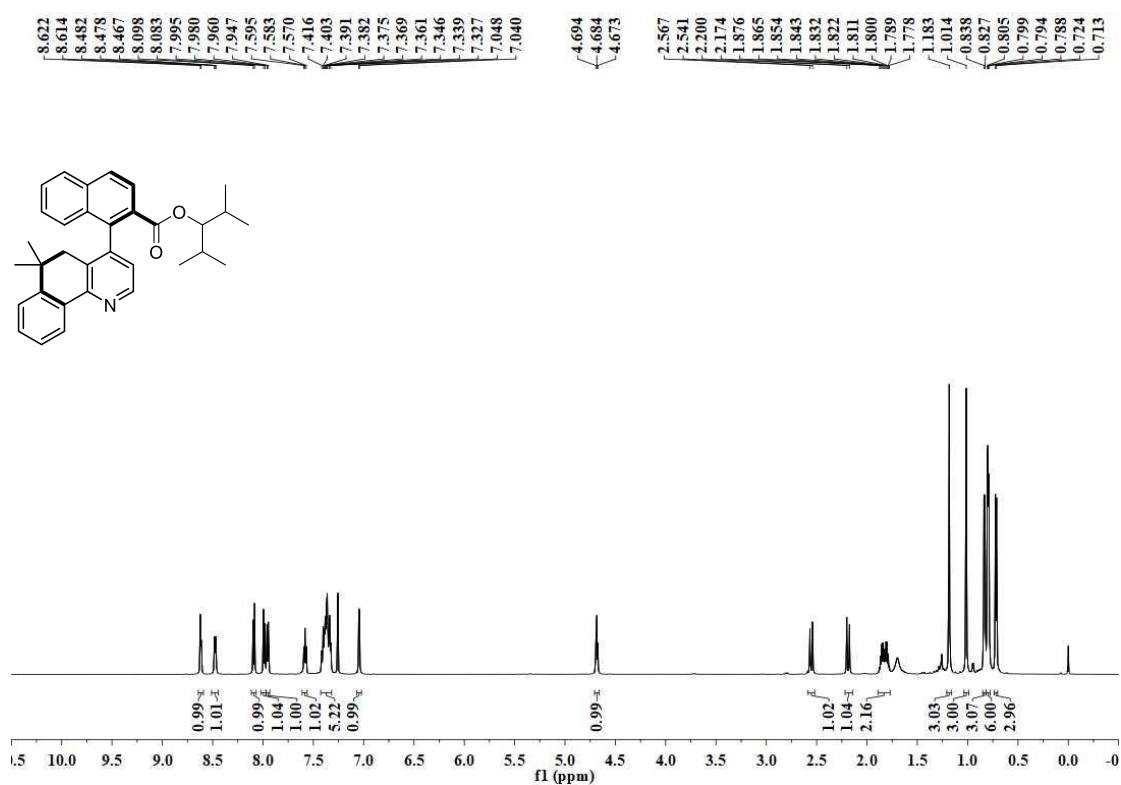

**$^{13}\text{C}$  NMR Spectrum of 111 (151 MHz,  $\text{CDCl}_3$ )**

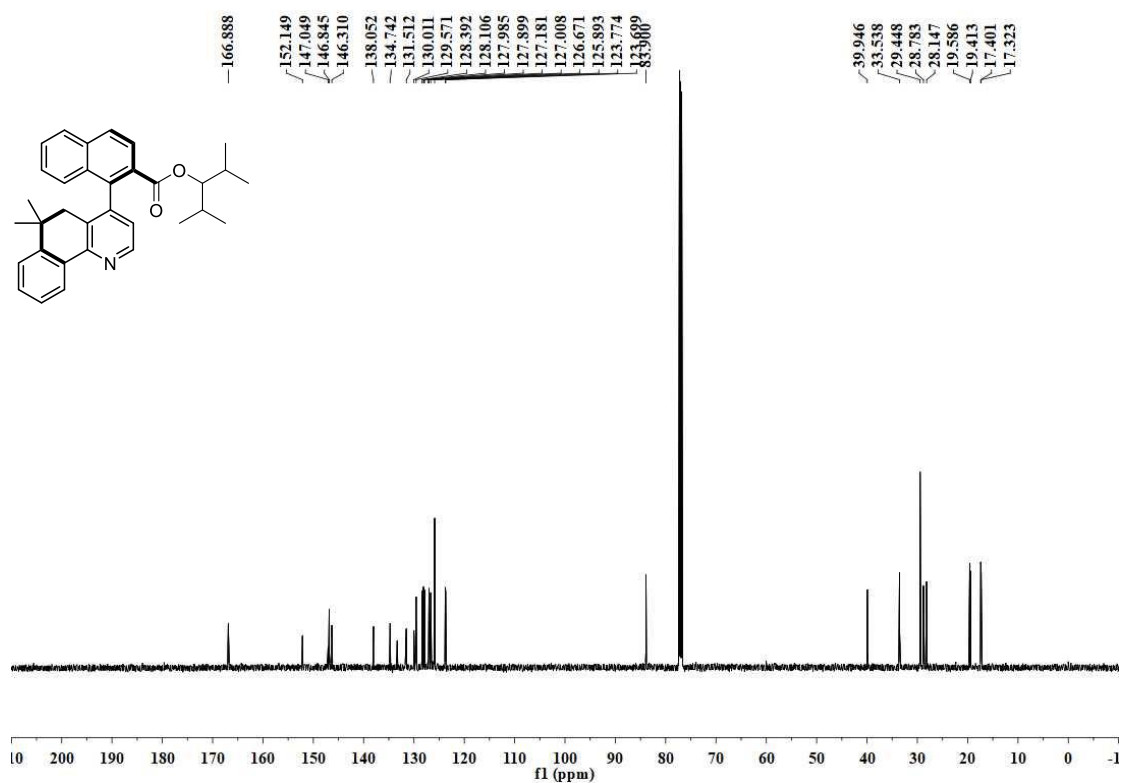

**$^1\text{H}$  NMR Spectrum of 112 (600 MHz,  $\text{CDCl}_3$ )**

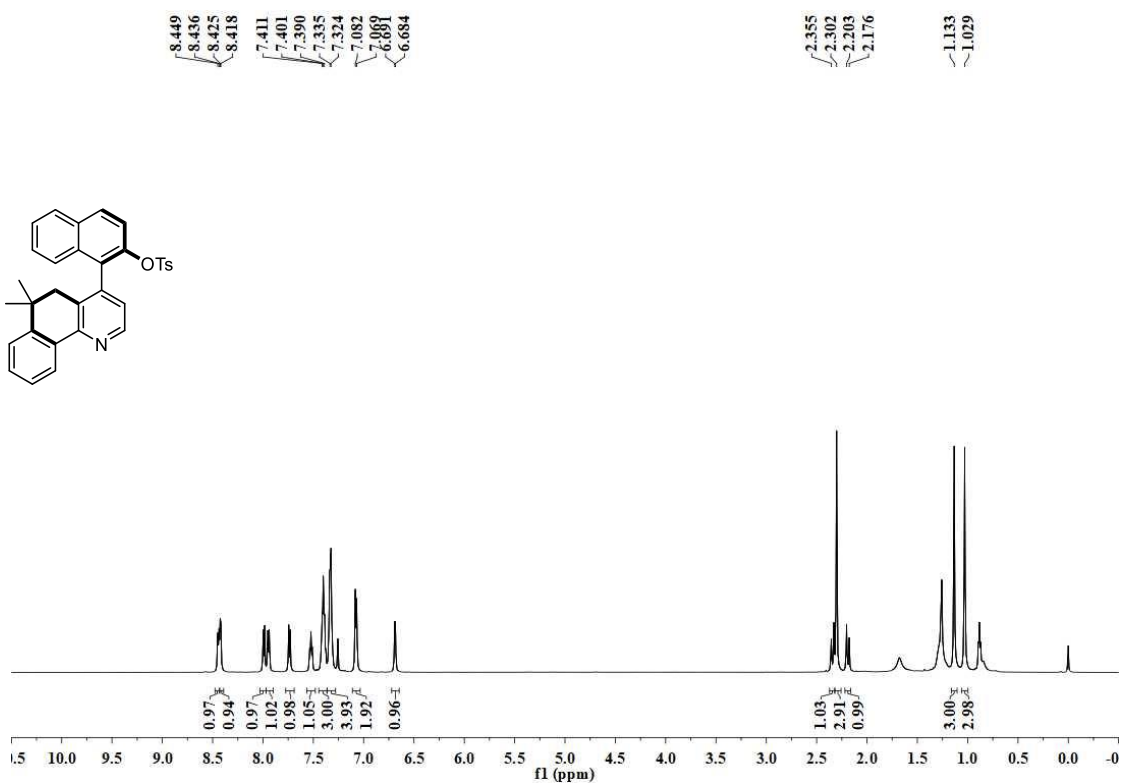



**<sup>13</sup>C NMR Spectrum of 112 (151 MHz, CDCl<sub>3</sub>)**

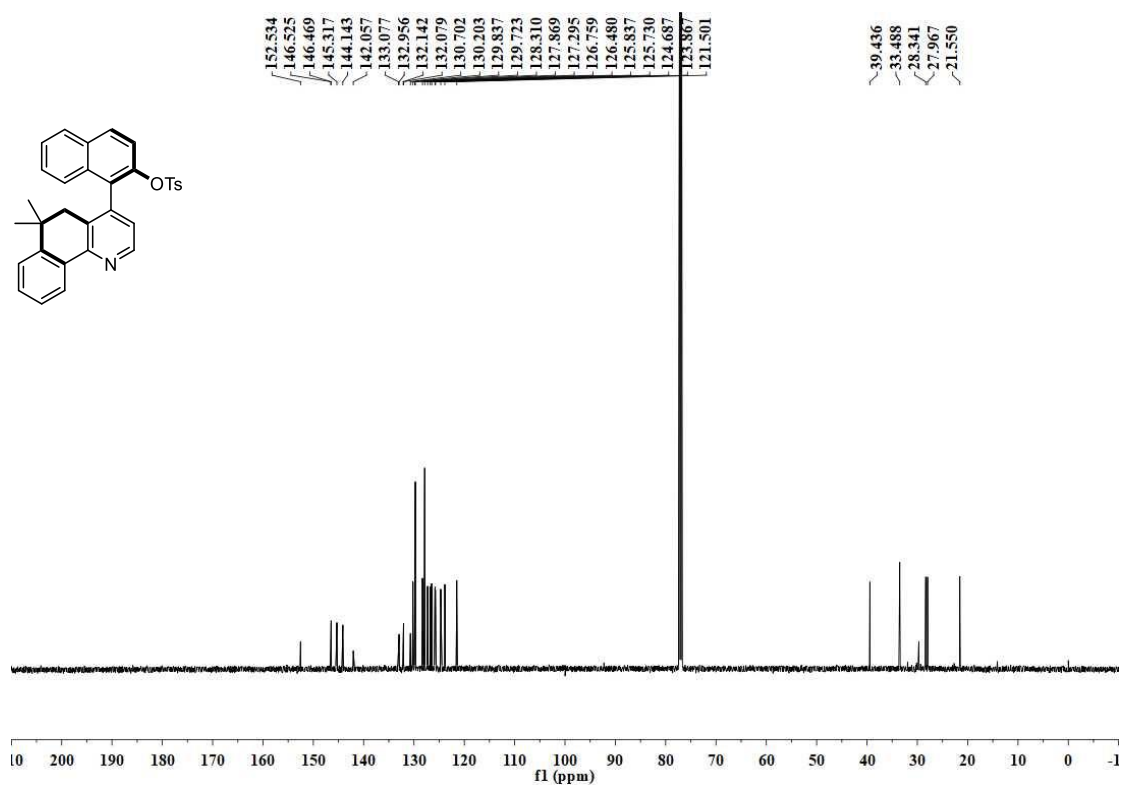

**<sup>1</sup>H NMR Spectrum of 113 (600 MHz, CDCl<sub>3</sub>)**

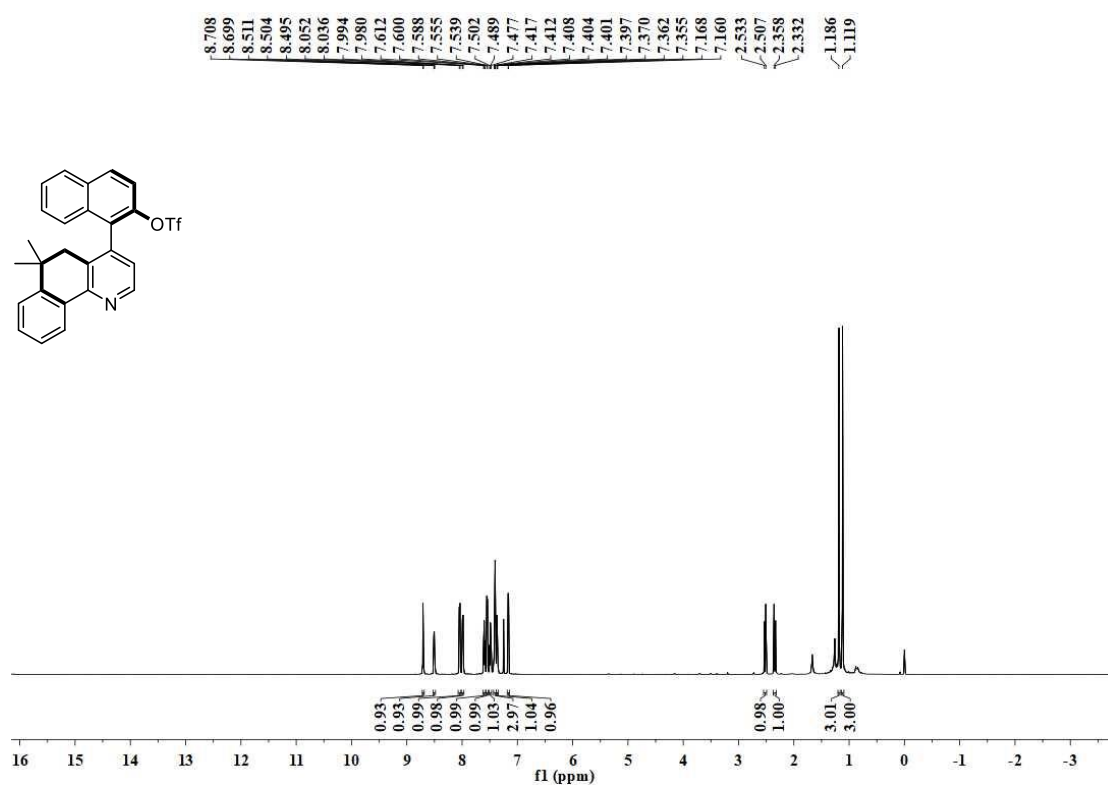

Chemical structure of compound 10 is shown. The  $^1\text{H}$  NMR spectrum (CDCl<sub>3</sub>) displays the following peaks (ppm):

- 39.768
- 33.629
- 28.297
- 28.238
- 153.033
- 147.290
- 146.361
- 143.660
- 140.733
- 133.057
- 132.492
- 132.286
- 130.979
- 130.273
- 129.985
- 128.919
- 128.455
- 128.040
- 127.379
- 126.867
- 126.140
- 125.958
- 124.576
- 123.878
- 119.376
- 117.253

Chemical structure of the compound is shown in the top left corner. The structure is a complex polycyclic molecule featuring a naphthalene core, a pyridine ring, and a triflate (OTf) group. The x-axis is labeled "f1 (ppm)" and ranges from -210 to 10. The y-axis represents intensity. A single sharp peak is observed at approximately -74.125 ppm, which is labeled with its chemical shift value.

**<sup>1</sup>H NMR Spectrum of 114 (600 MHz, CDCl<sub>3</sub>)**

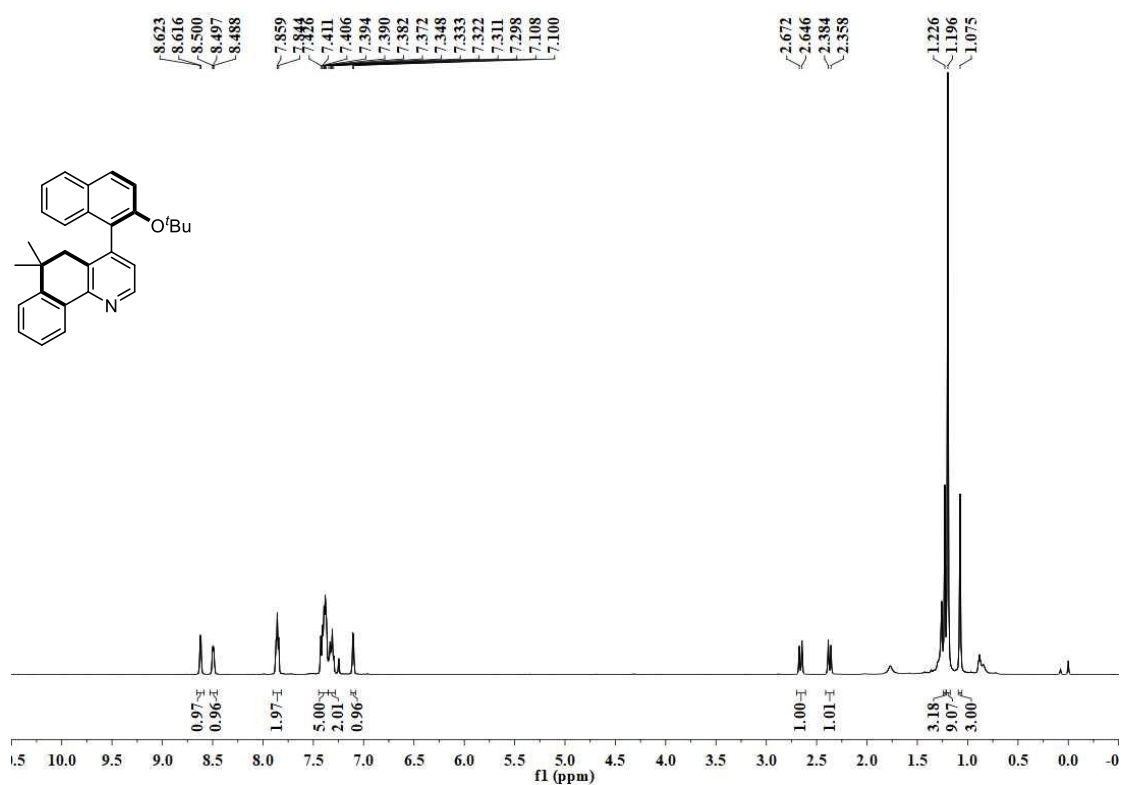

**<sup>13</sup>C NMR Spectrum of 114 (151 MHz, CDCl<sub>3</sub>)**

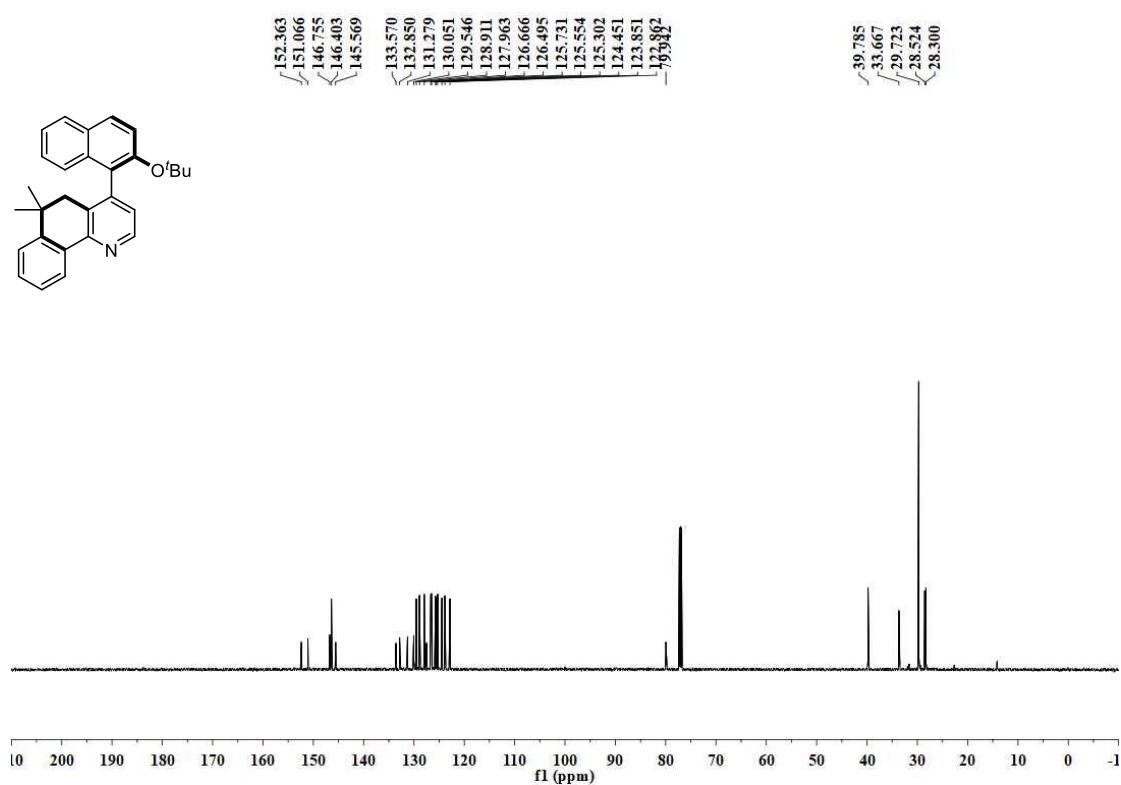

**<sup>1</sup>H NMR Spectrum of 115 (600 MHz, CDCl<sub>3</sub>)**

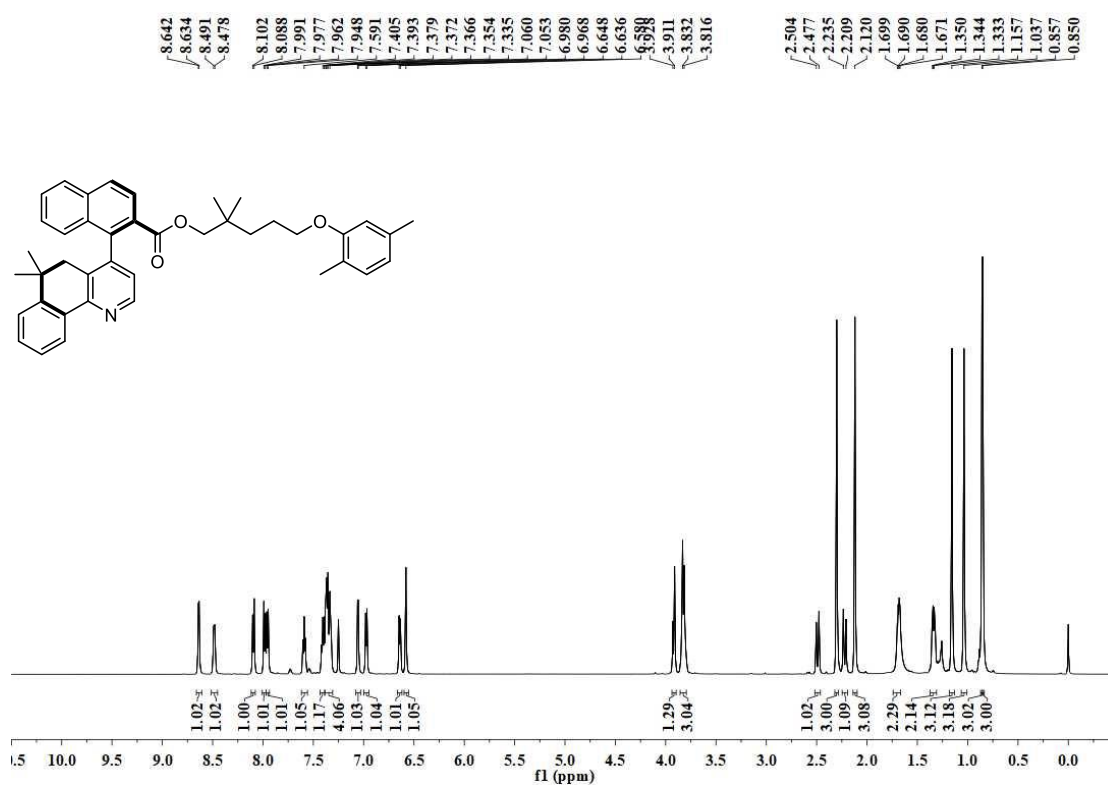

**<sup>13</sup>C NMR Spectrum of 115 (151 MHz, CDCl<sub>3</sub>)**

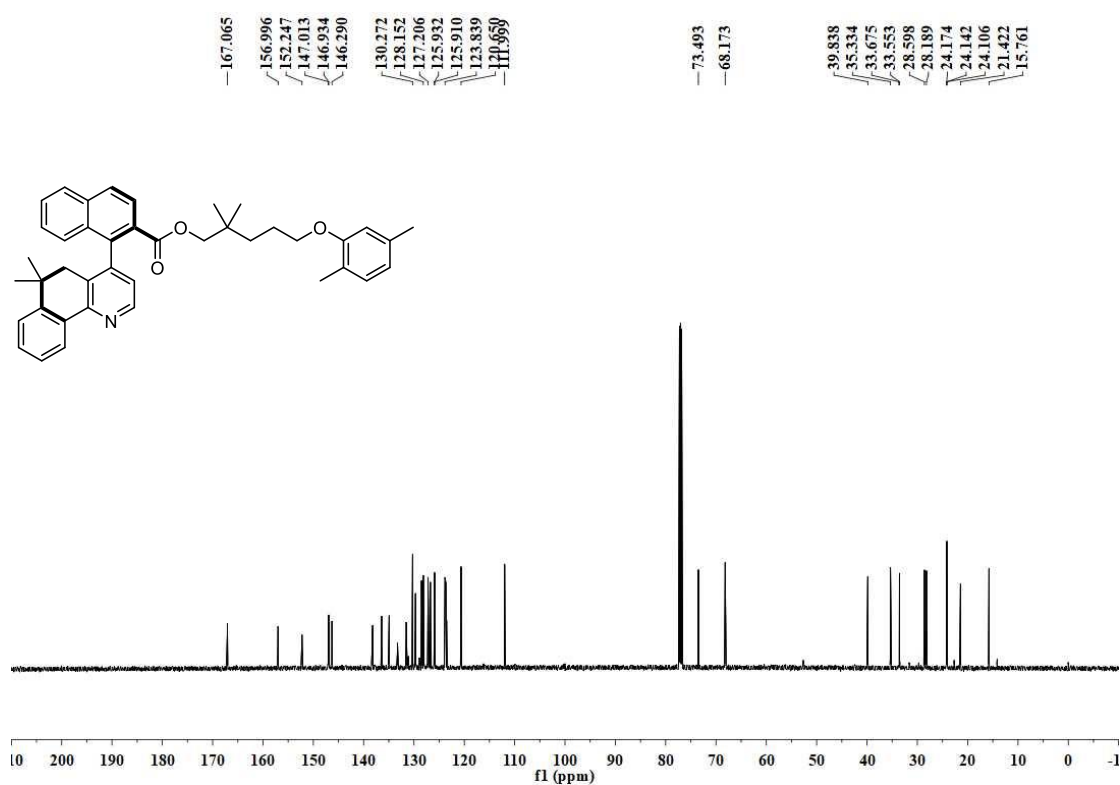

**<sup>1</sup>H NMR Spectrum of 116 (600 MHz, CDCl<sub>3</sub>)**

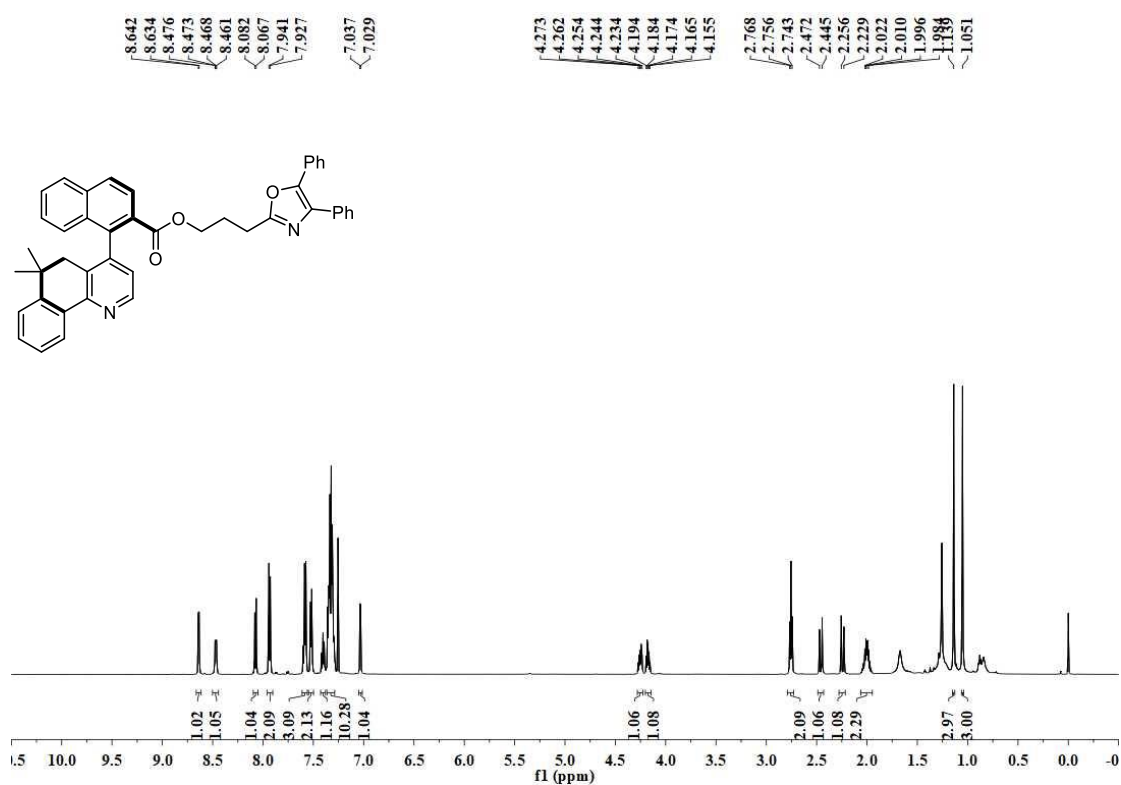

**<sup>13</sup>C NMR Spectrum of 116 (151 MHz, CDCl<sub>3</sub>)**

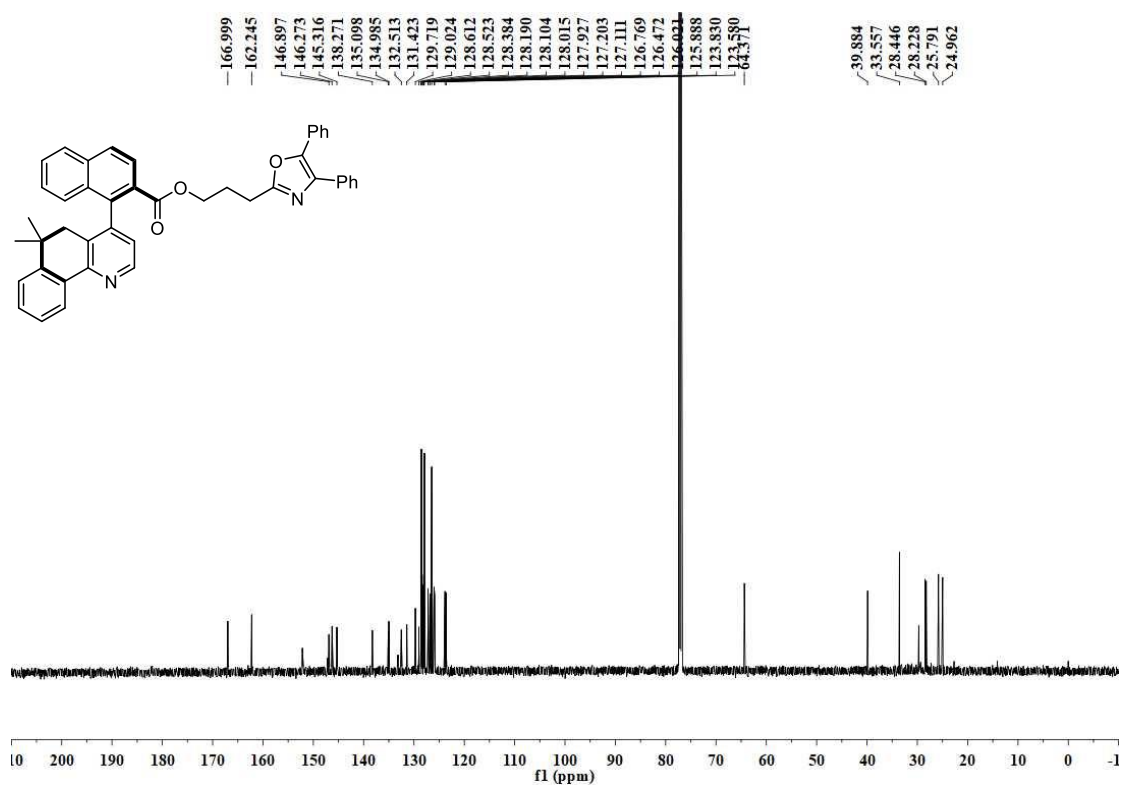

**<sup>1</sup>H NMR Spectrum of 65 (600 MHz, CDCl<sub>3</sub>)**

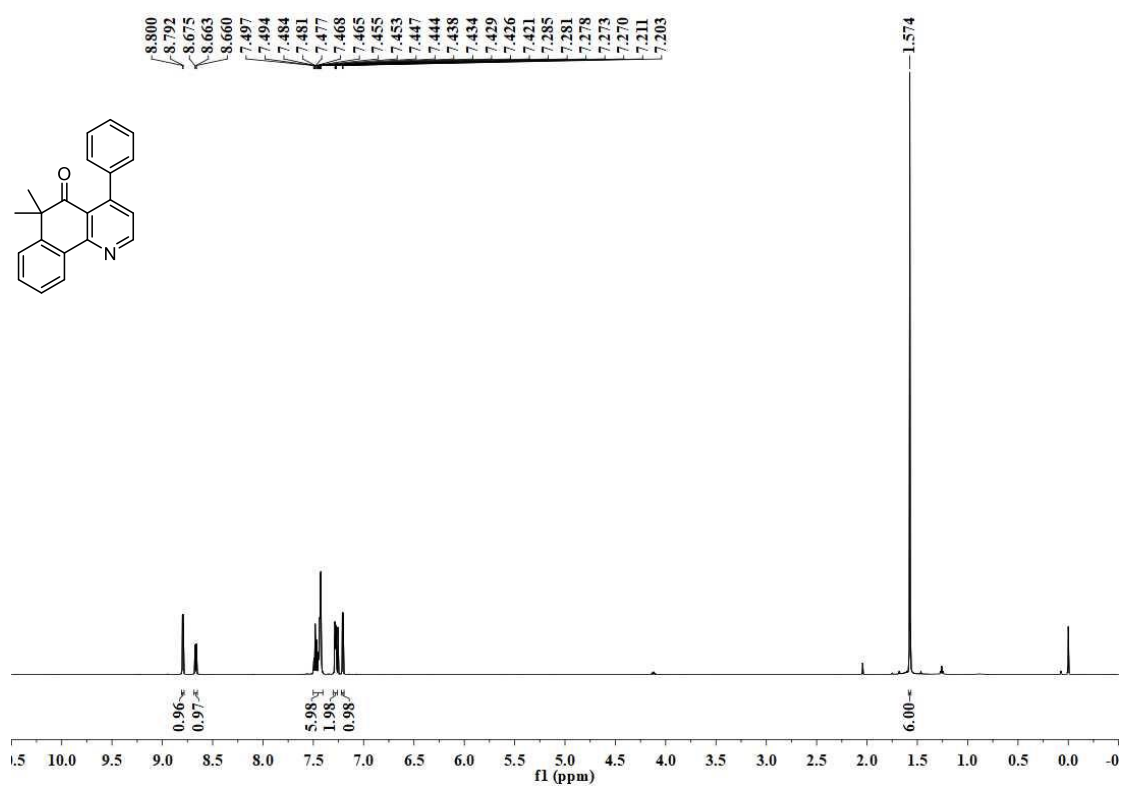

**<sup>13</sup>C NMR Spectrum of 65 (151 MHz, CDCl<sub>3</sub>)**

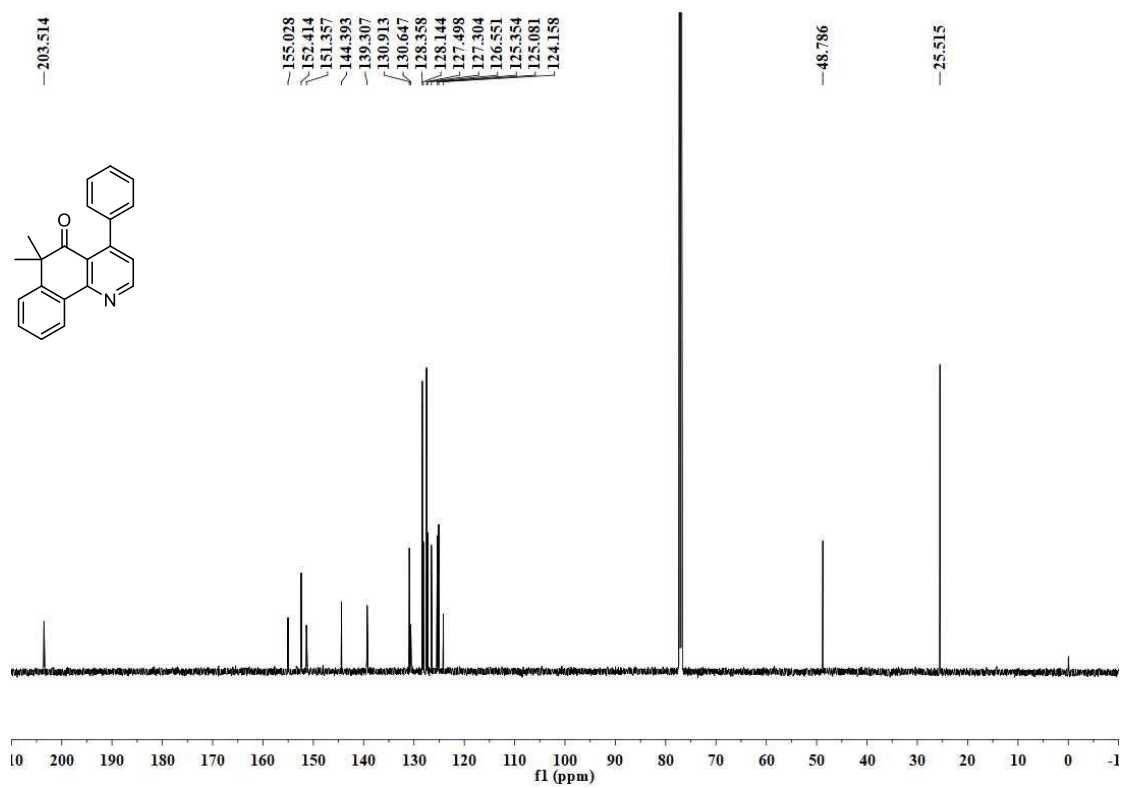

**<sup>1</sup>H NMR Spectrum of 66 (600 MHz, CDCl<sub>3</sub>)**

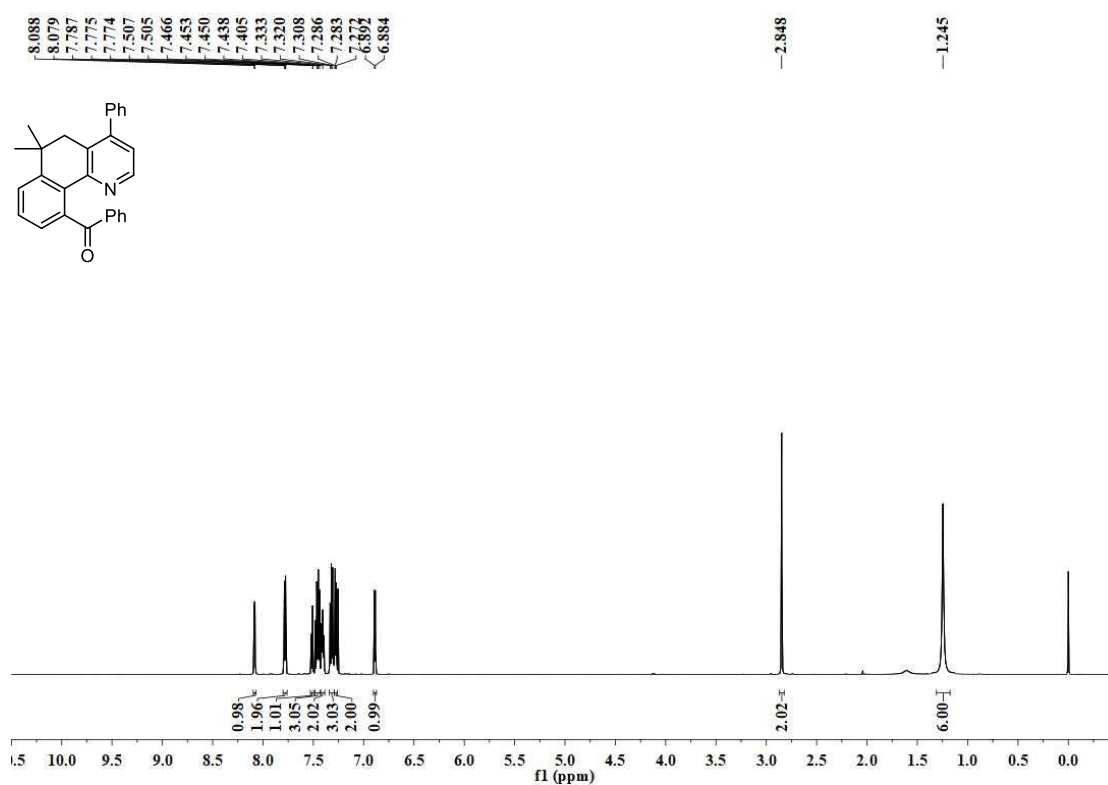

**<sup>13</sup>C NMR Spectrum of 66 (151 MHz, CDCl<sub>3</sub>)**

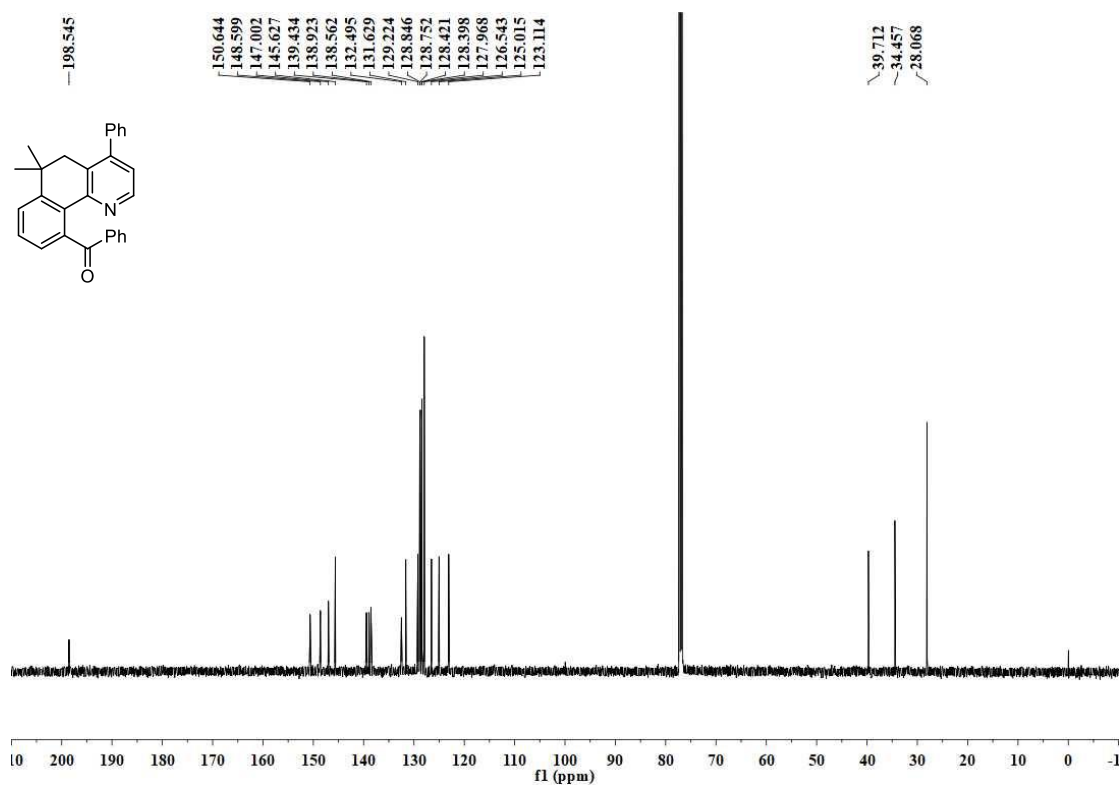

**<sup>1</sup>H NMR Spectrum of 67 (600 MHz, CDCl<sub>3</sub>)**

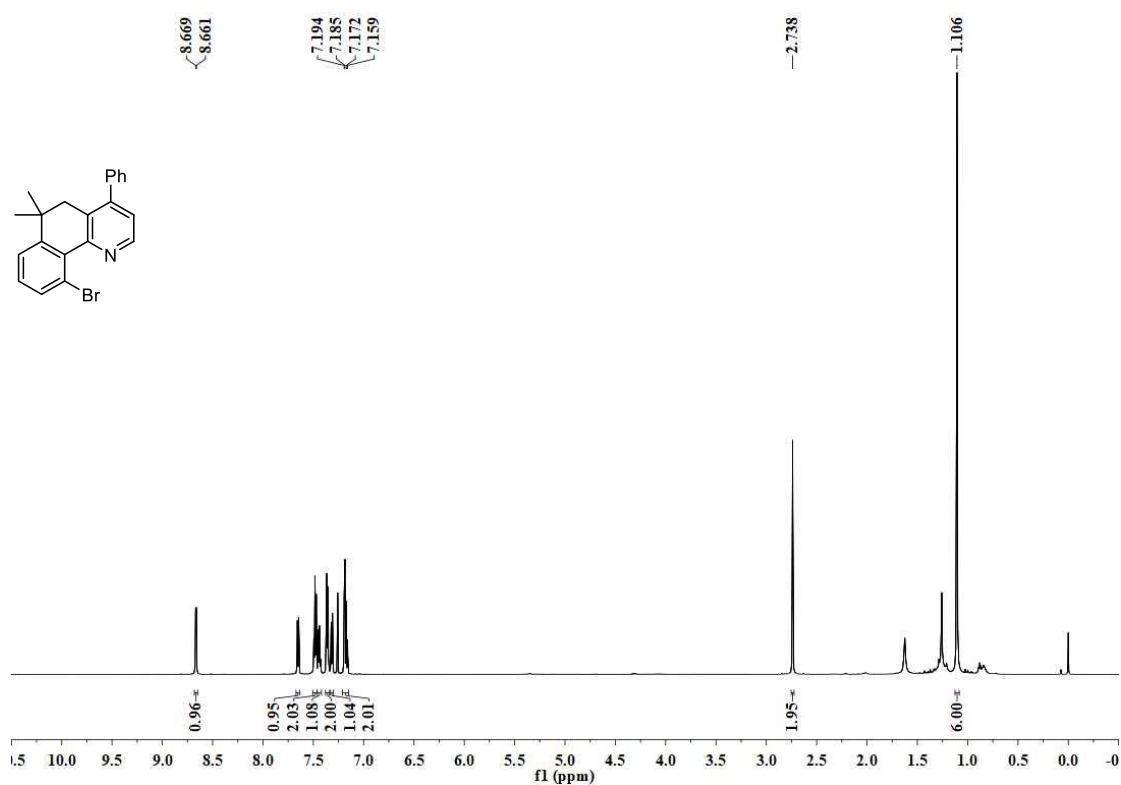

**<sup>13</sup>C NMR Spectrum of 67 (151 MHz, CDCl<sub>3</sub>)**

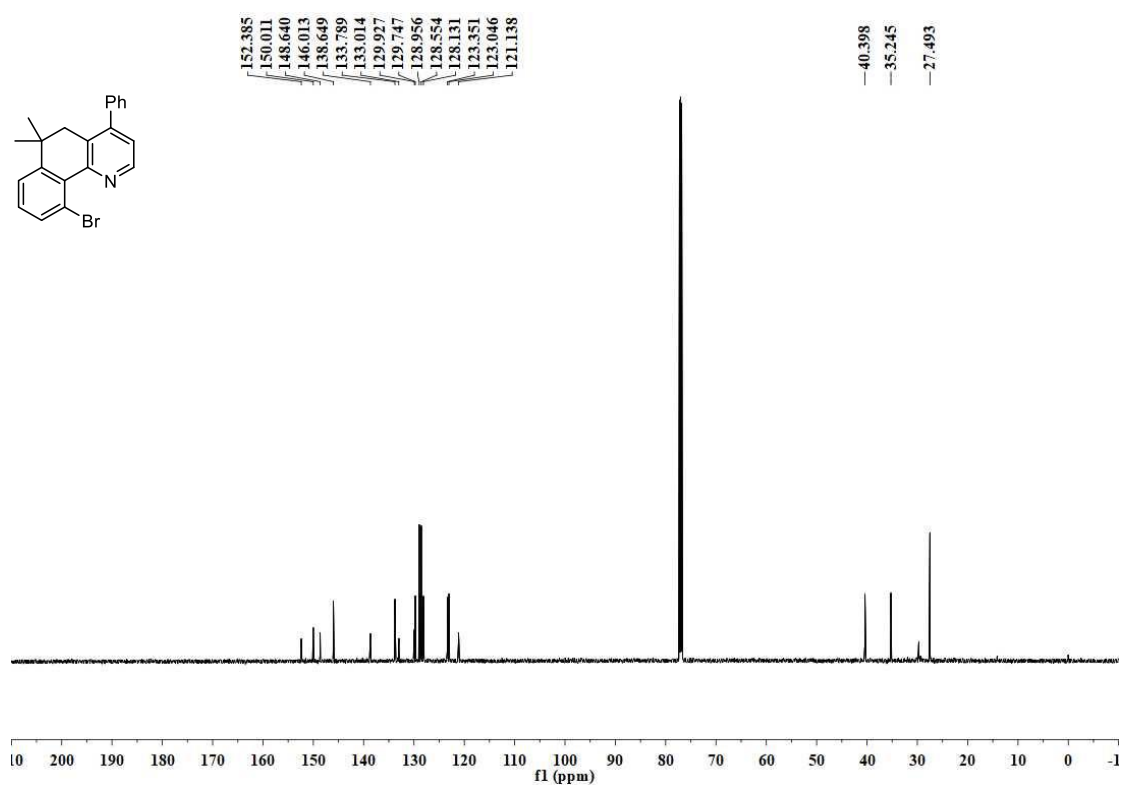



**<sup>1</sup>H NMR Spectrum of 68 (600 MHz, CDCl<sub>3</sub>)**

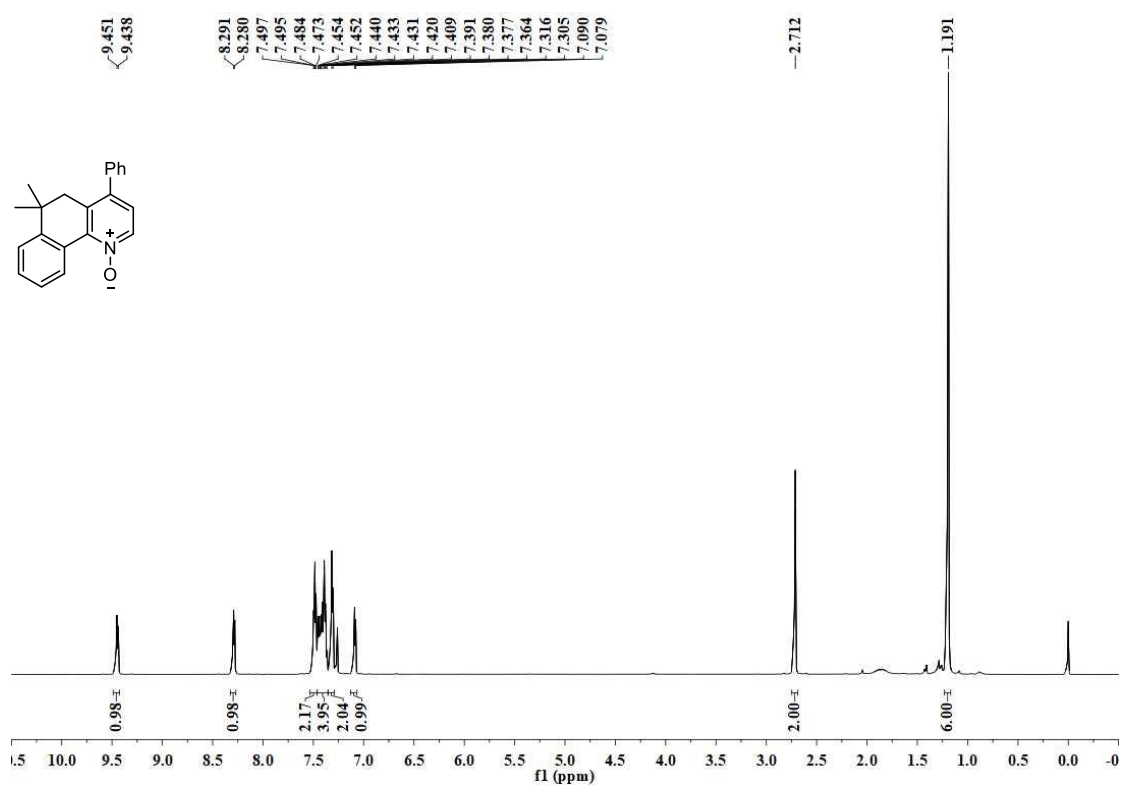

**<sup>13</sup>C NMR Spectrum of 68 (151 MHz, CDCl<sub>3</sub>)**

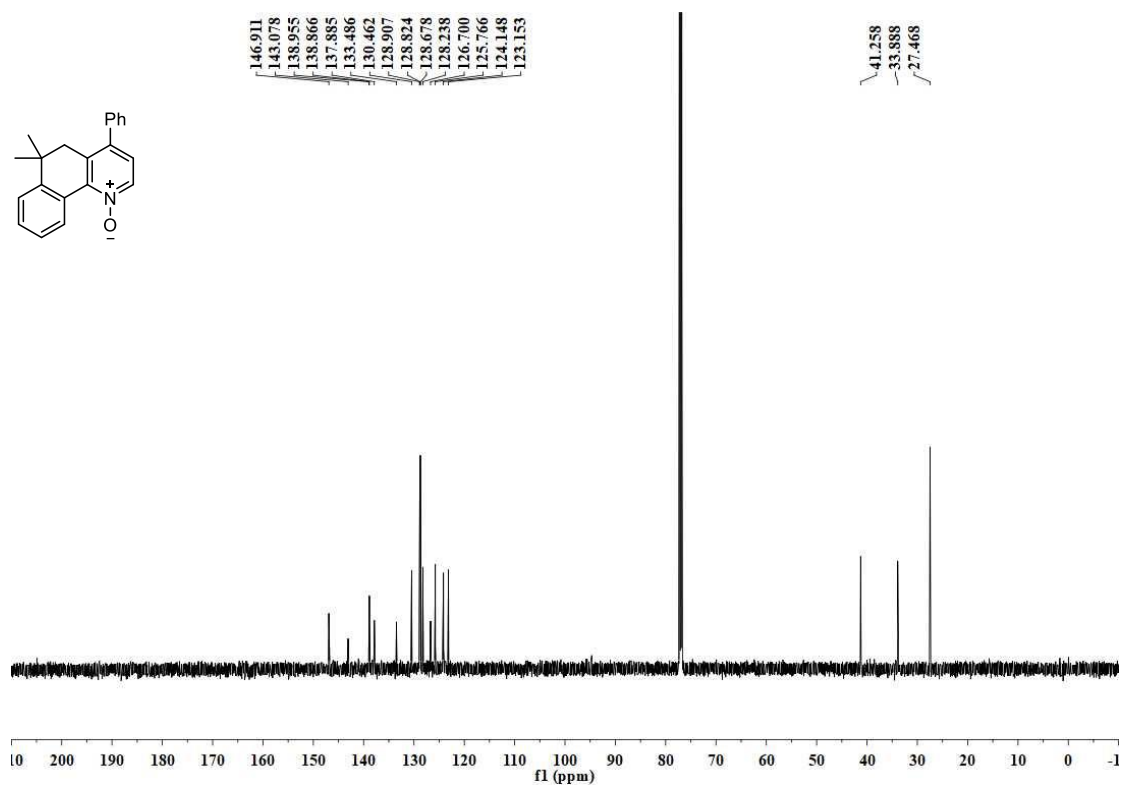

**<sup>1</sup>H NMR Spectrum of 69 (600 MHz, CDCl<sub>3</sub>)**

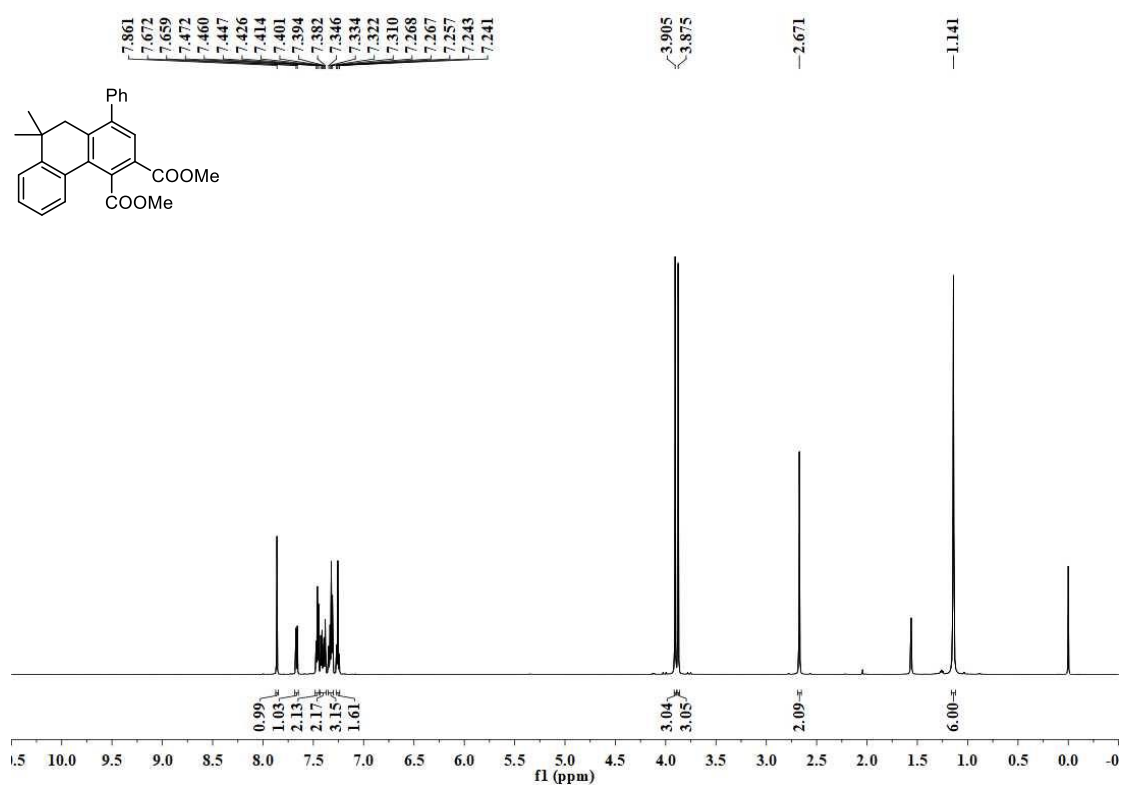

**<sup>13</sup>C NMR Spectrum of 69 (151 MHz, CDCl<sub>3</sub>)**

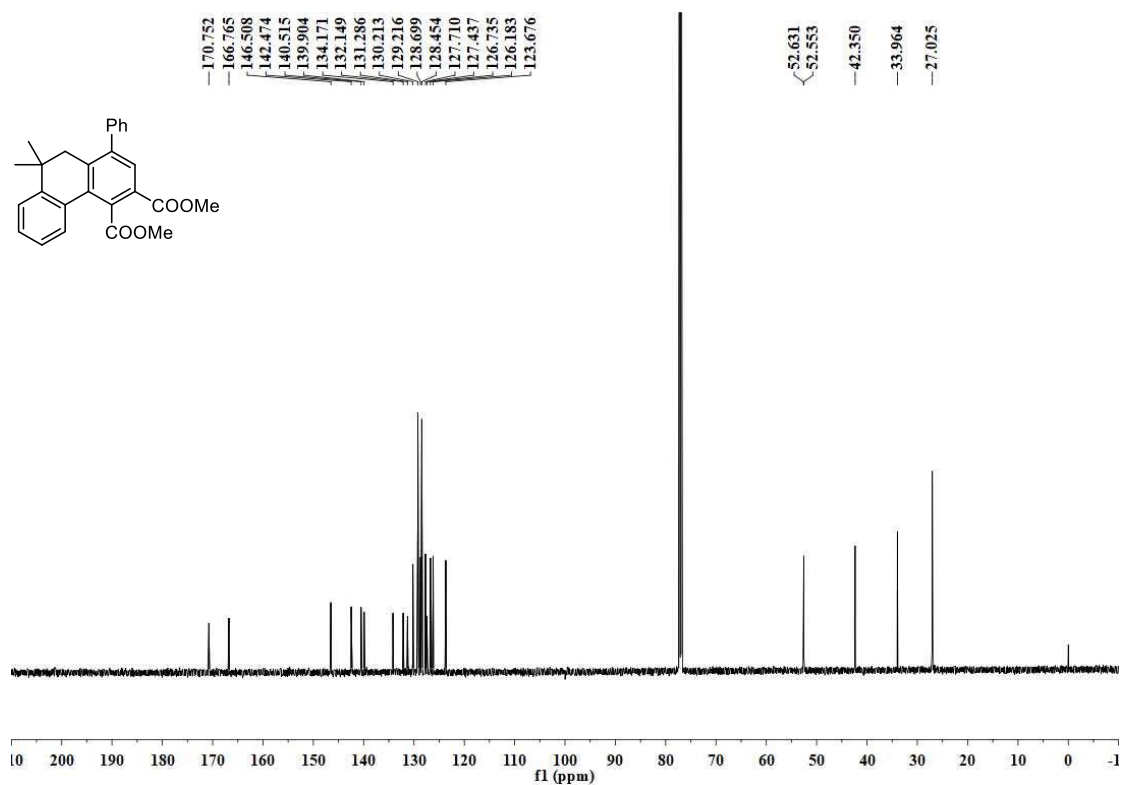

**<sup>1</sup>H NMR Spectrum of 70 (600 MHz, CDCl<sub>3</sub>)**

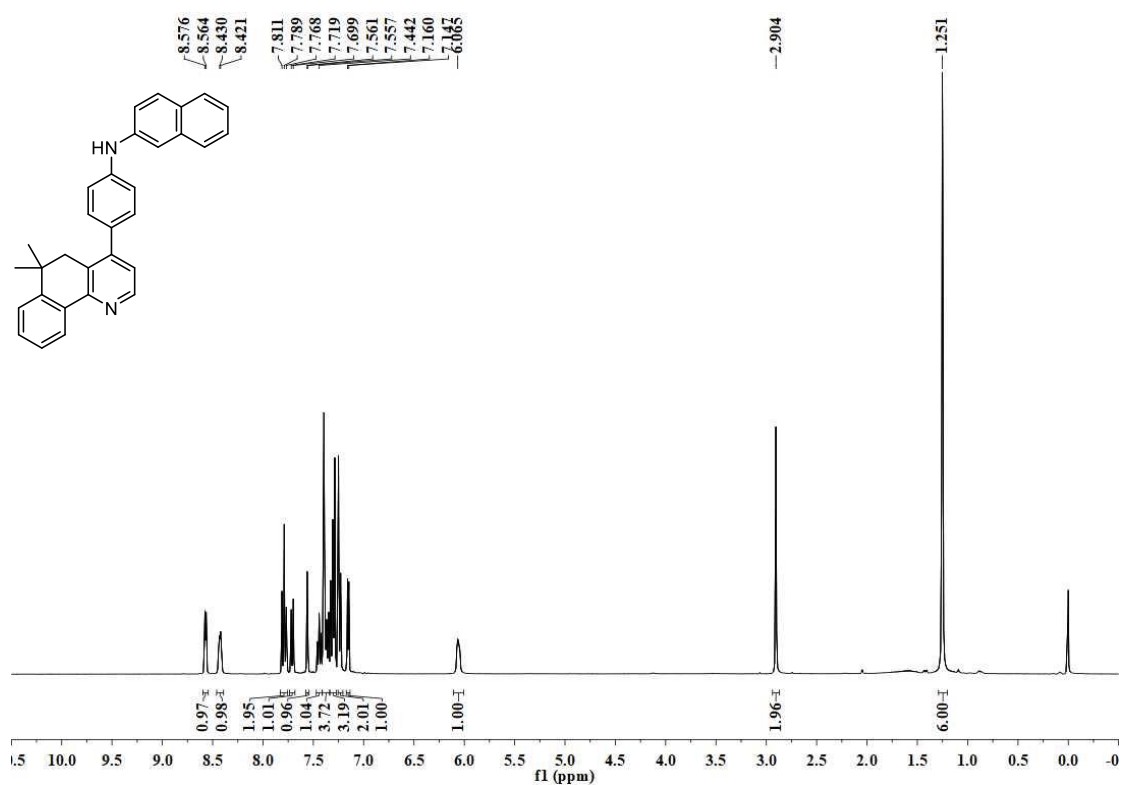

**<sup>13</sup>C NMR Spectrum of 70 (151 MHz, CDCl<sub>3</sub>)**

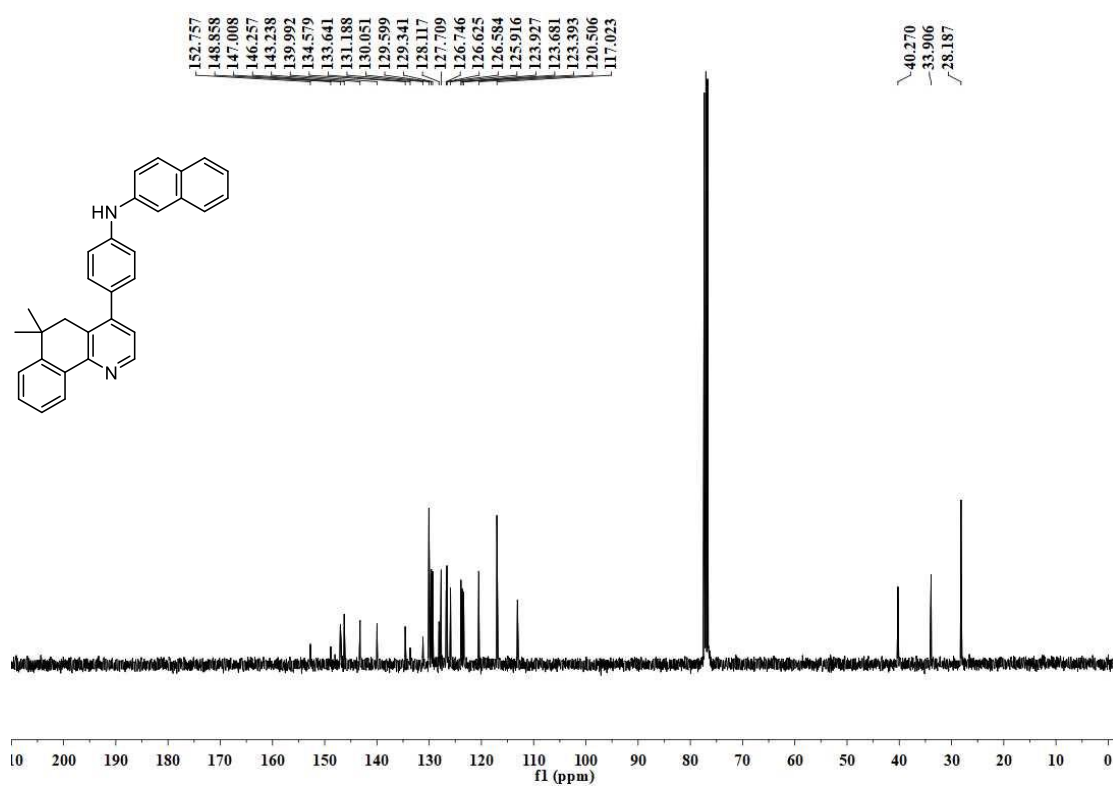

**<sup>1</sup>H NMR Spectrum of 71 (600 MHz, CDCl<sub>3</sub>)**

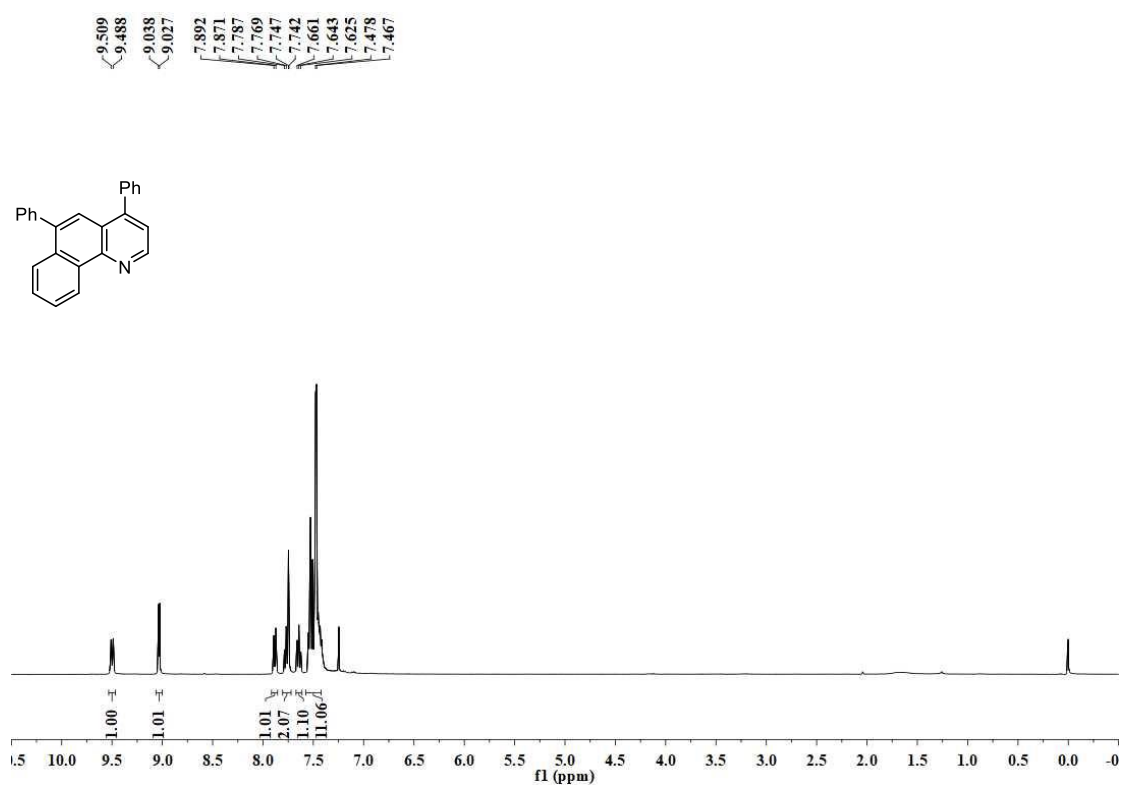

**<sup>13</sup>C NMR Spectrum of 71 (151 MHz, CDCl<sub>3</sub>)**

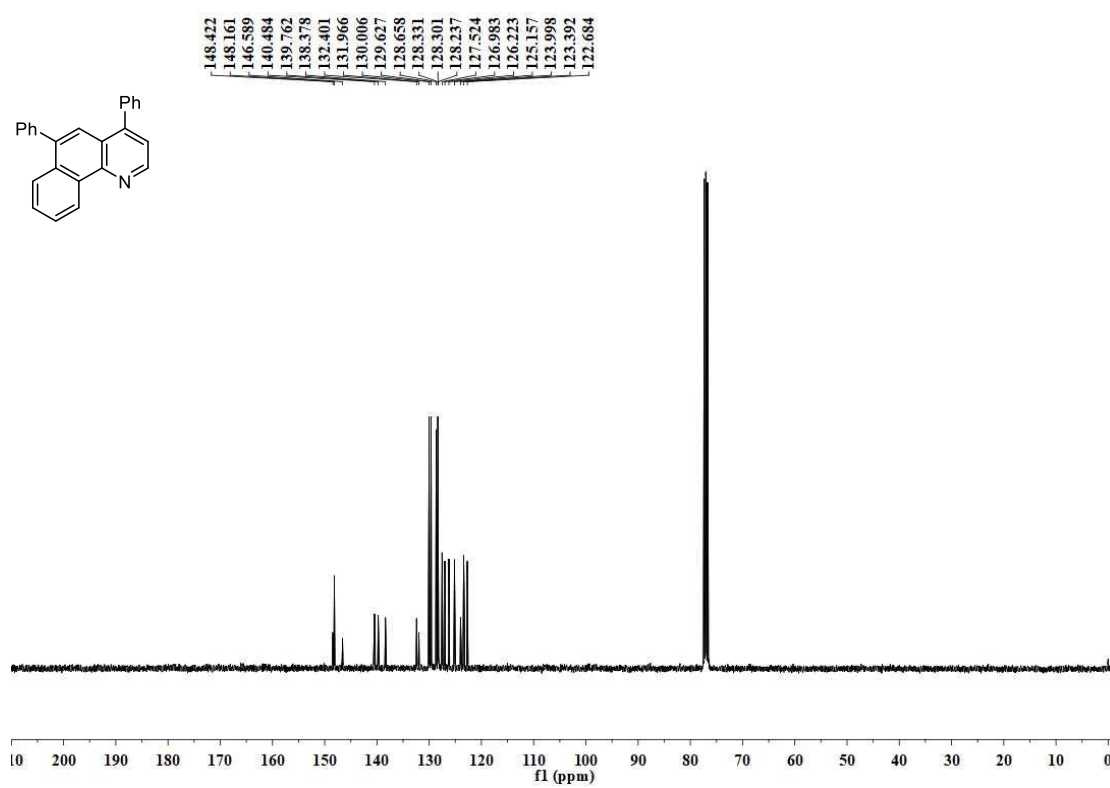

**<sup>1</sup>H NMR Spectrum of 117 (600 MHz, DMSO)**

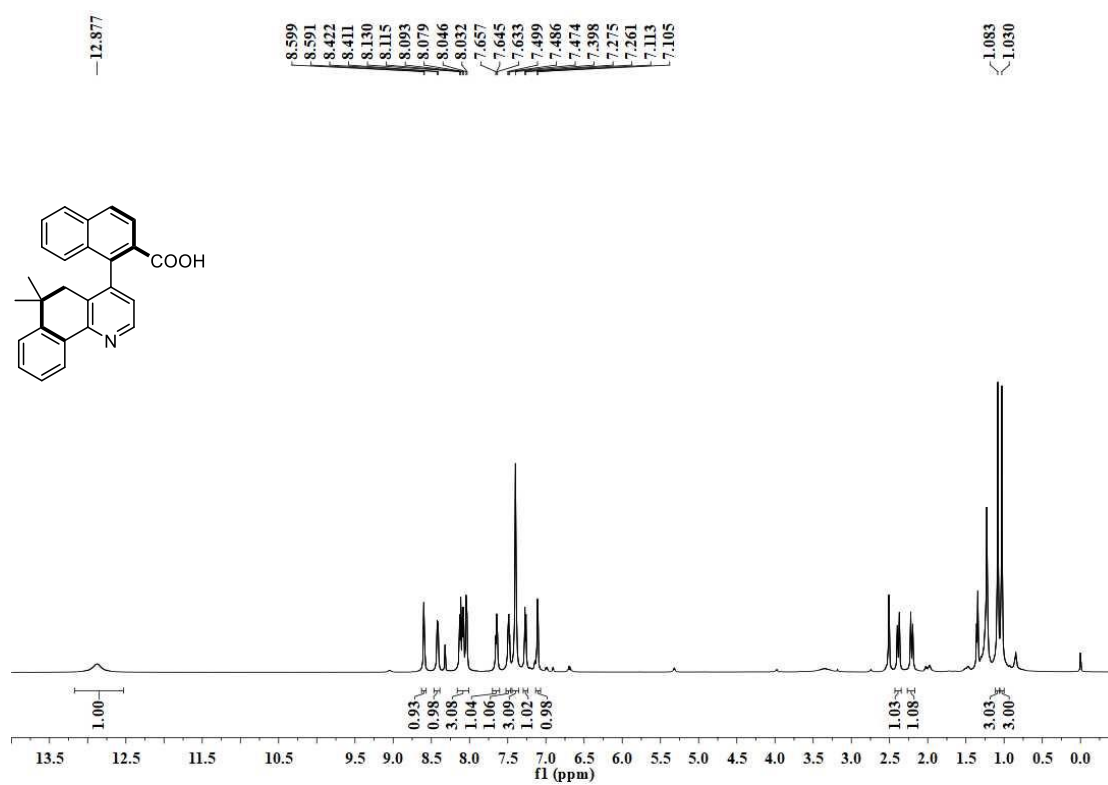

**<sup>13</sup>C NMR Spectrum of 117 (151 MHz, DMSO)**

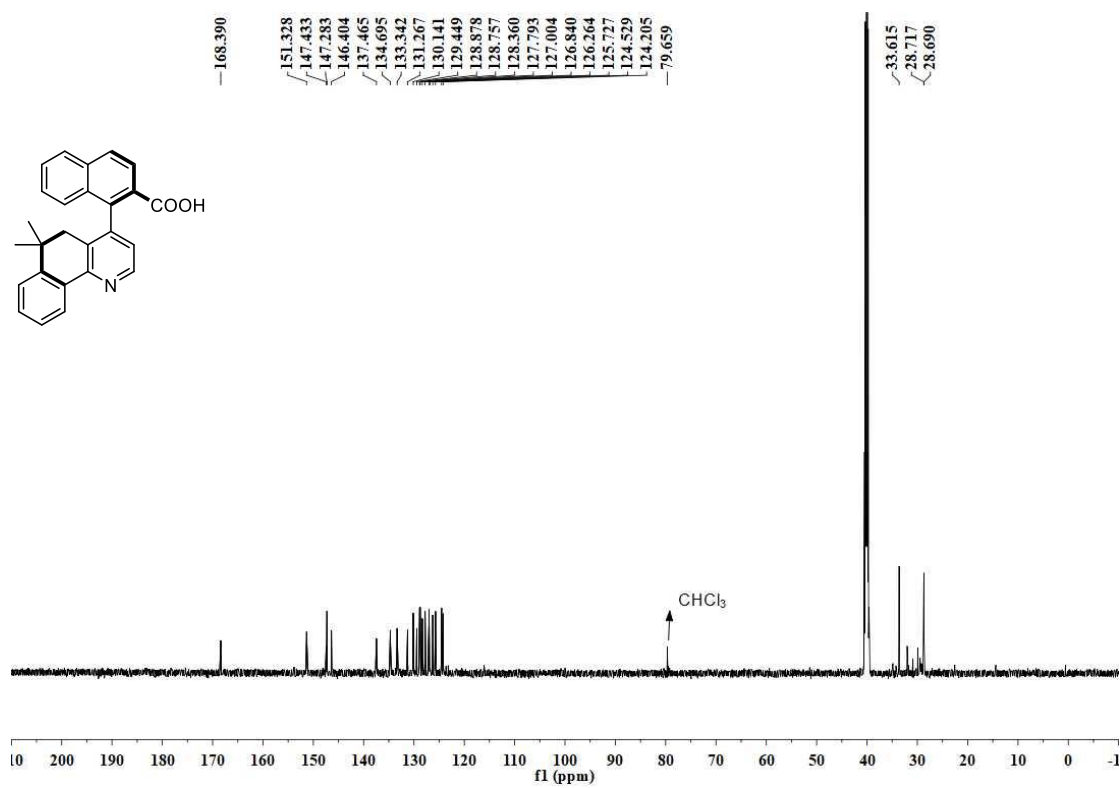

Chemical structure of 2-(2,2-dimethyl-1-phenyl-1H-indol-3-yl)-1-phenylethanol and its <sup>1</sup>H NMR spectrum (CDCl<sub>3</sub>, 400 MHz, 25 °C).

**Chemical structure:** CC1(C)C=C(C2=CC=CC=C2)C3=CC=CC=C3N1C4=CC=CC=C4CO

**<sup>1</sup>H NMR spectrum (CDCl<sub>3</sub>, 400 MHz, 25 °C):**

**Chemical shift (ppm):** 8.661, 8.654, 8.490, 8.482, 7.993, 7.979, 7.932, 7.919, 7.781, 7.767, 7.7498, 7.7486, 7.404, 7.399, 7.391, 7.376, 7.358, 7.351, 7.257, 7.242, 7.075, 4.968, 4.959, 4.510, 2.409, 2.383, 2.345, 2.318, 1.137, 1.099.

**Integration values:** 0.97, 0.99, 1.02, 1.02, 0.99, 1.05, 4.09, 1.18, 0.98, 2.07, 1.04, 1.41, 1.23, 3.01, 3.00.

Chemical structure: CC1=C(C2=CC=CC=C2)C3=CC=CC=C3N1C4=CC=CC=C4C5=CC=CC=C5CO

<sup>13</sup>C NMR spectrum (ppm):

- 152.814
- 147.366
- 146.367
- 145.997
- 135.365
- 133.828
- 133.143
- 132.889
- 131.423
- 130.233
- 129.914
- 128.732
- 128.200
- 126.860
- 126.608
- 126.119
- 125.874
- 125.773
- 125.596
- 124.180
- 123.902
- 62.944
- 39.646
- 33.587
- 28.226

**<sup>1</sup>H NMR Spectrum of 119 (600 MHz, CDCl<sub>3</sub>)**

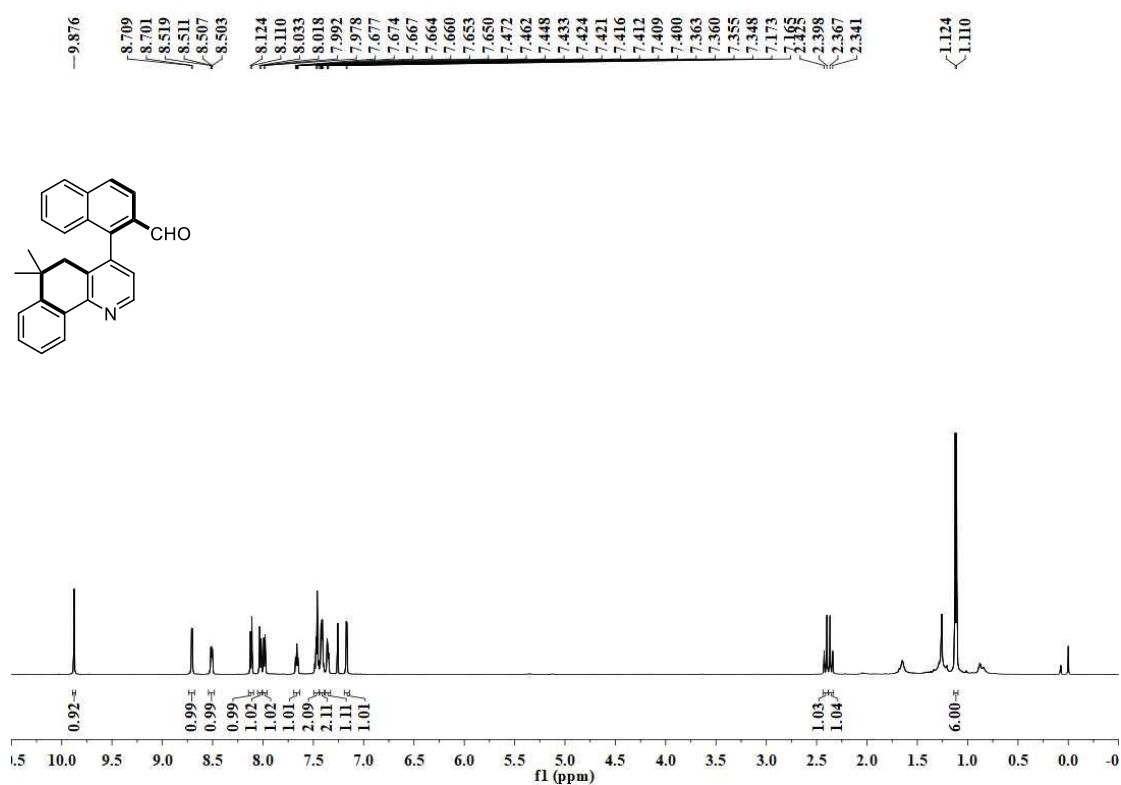

**<sup>13</sup>C NMR Spectrum of 119 (151 MHz, CDCl<sub>3</sub>)**

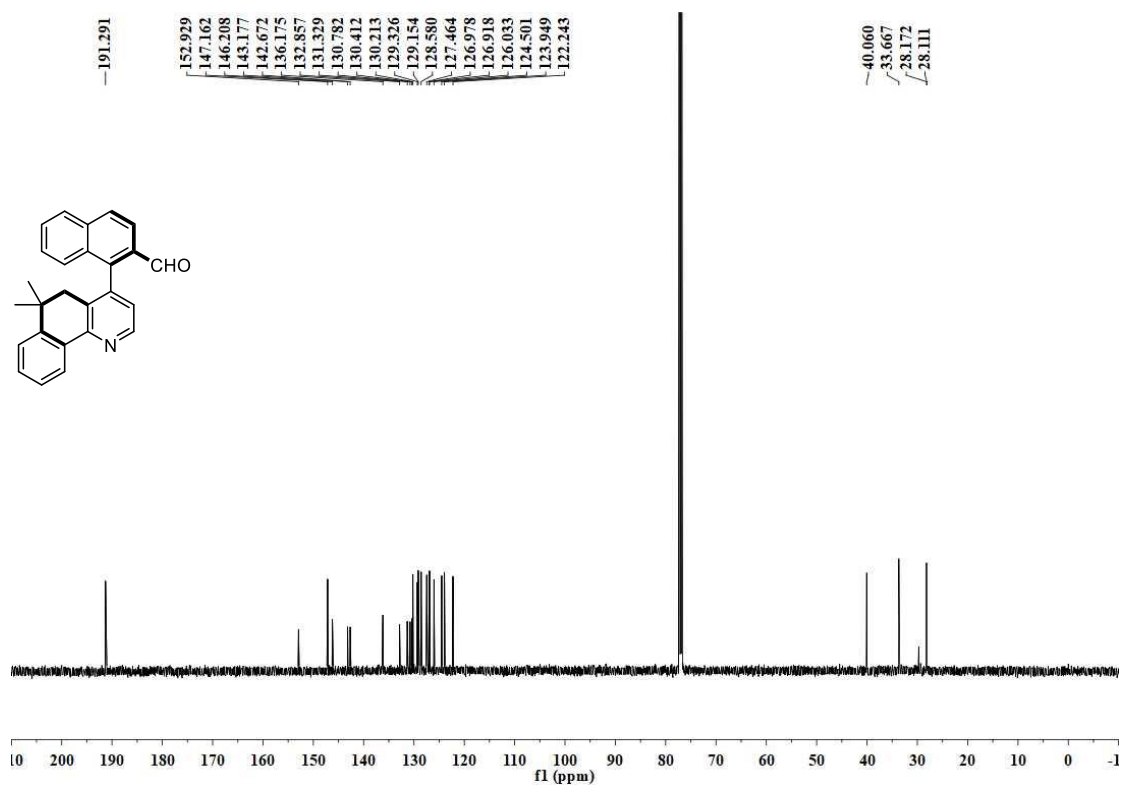

**<sup>1</sup>H NMR Spectrum of 120 (600 MHz, CDCl<sub>3</sub>)**

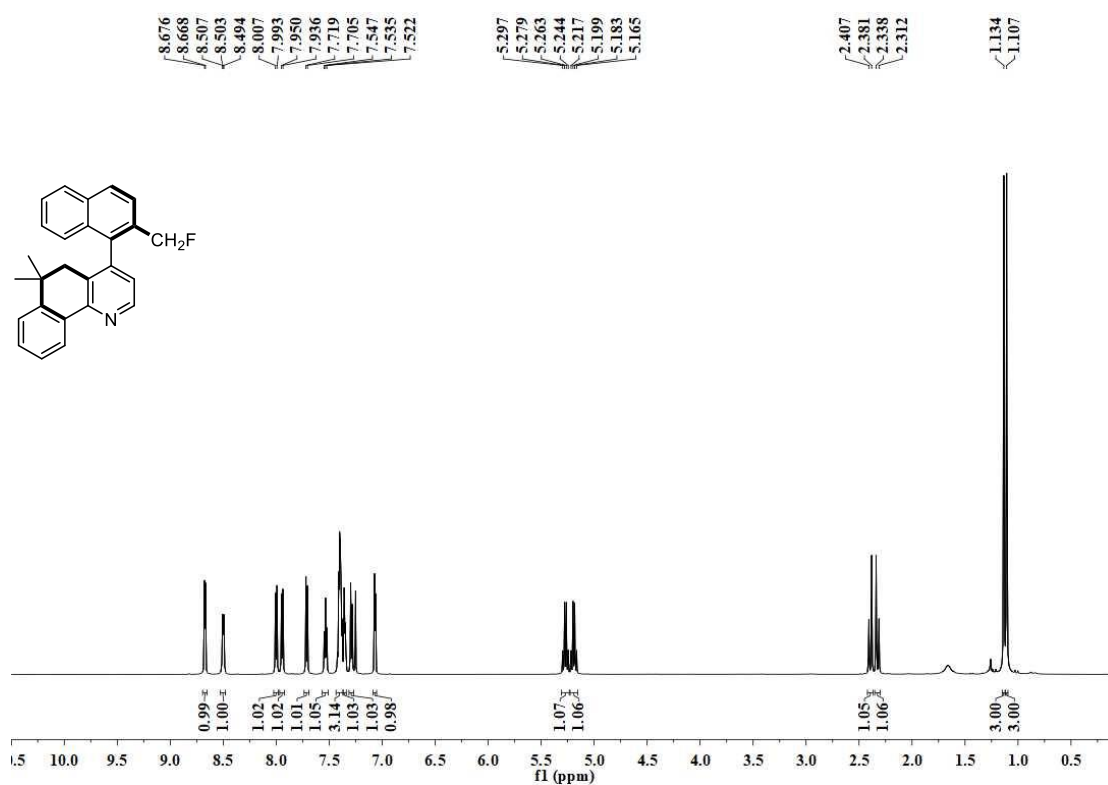

**<sup>13</sup>C NMR Spectrum of 120 (151 MHz, CDCl<sub>3</sub>)**

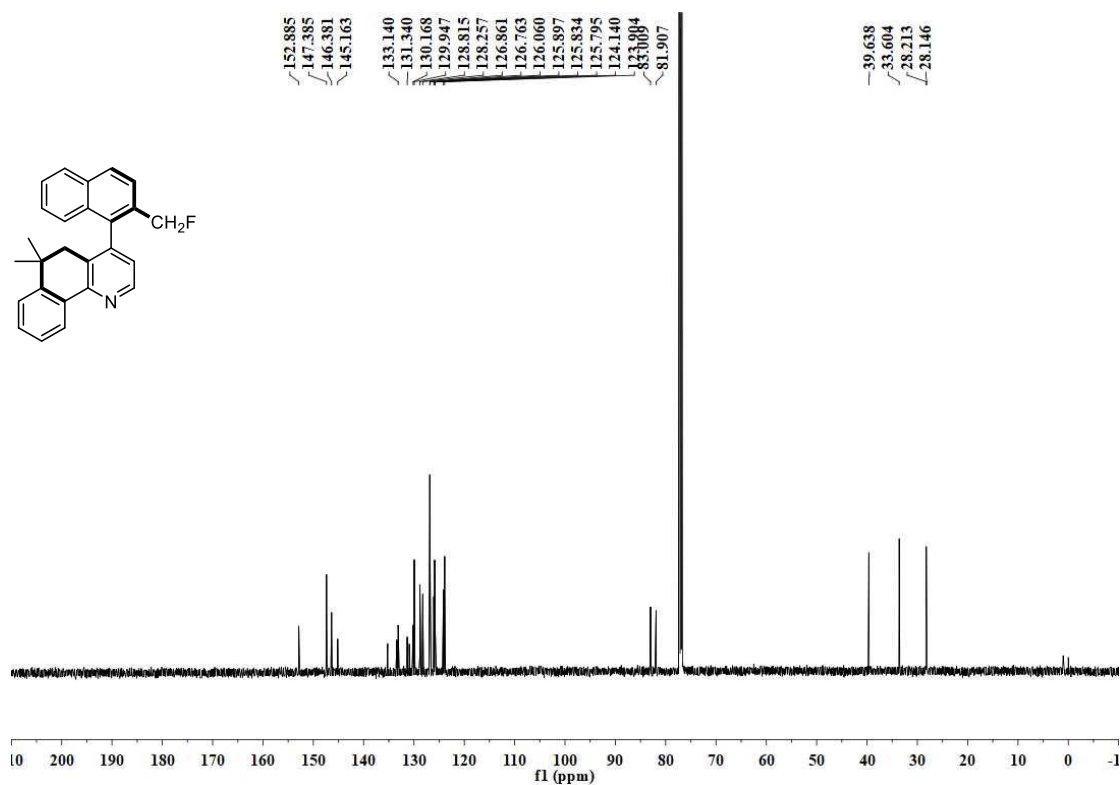



**$^{19}\text{F}$  NMR Spectrum of 120 (565 MHz,  $\text{CDCl}_3$ )**

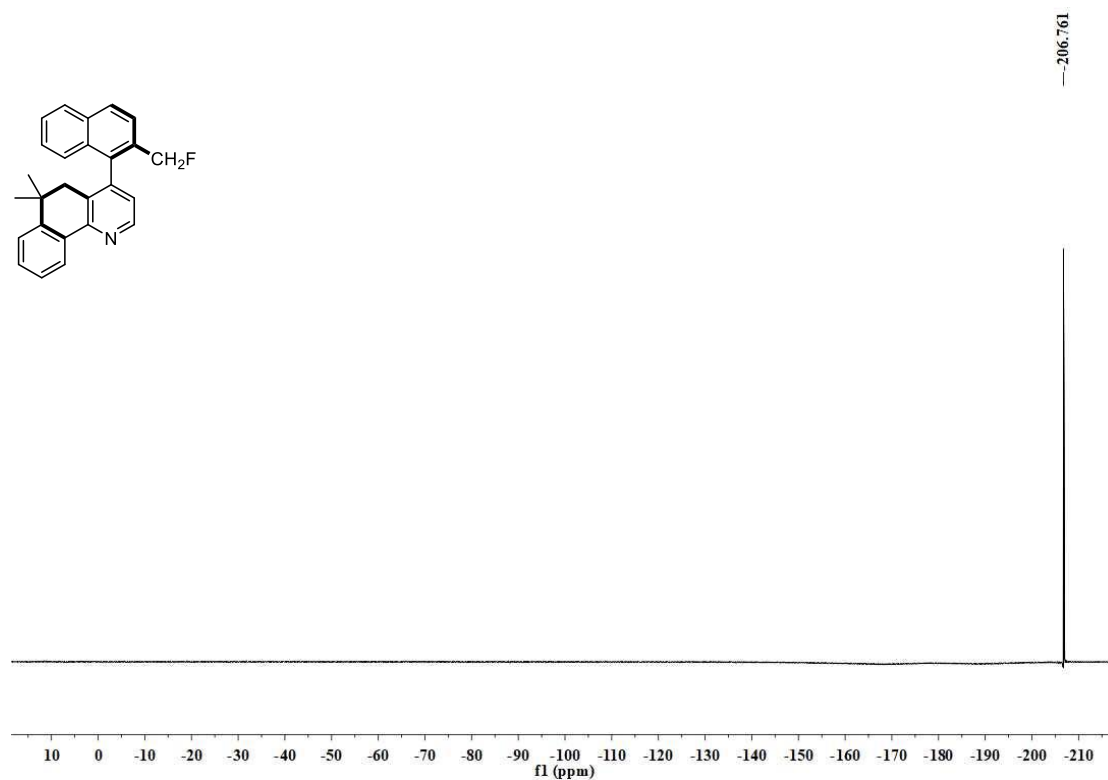

**$^1\text{H}$  NMR Spectrum of 74 (600 MHz,  $\text{CDCl}_3$ )**

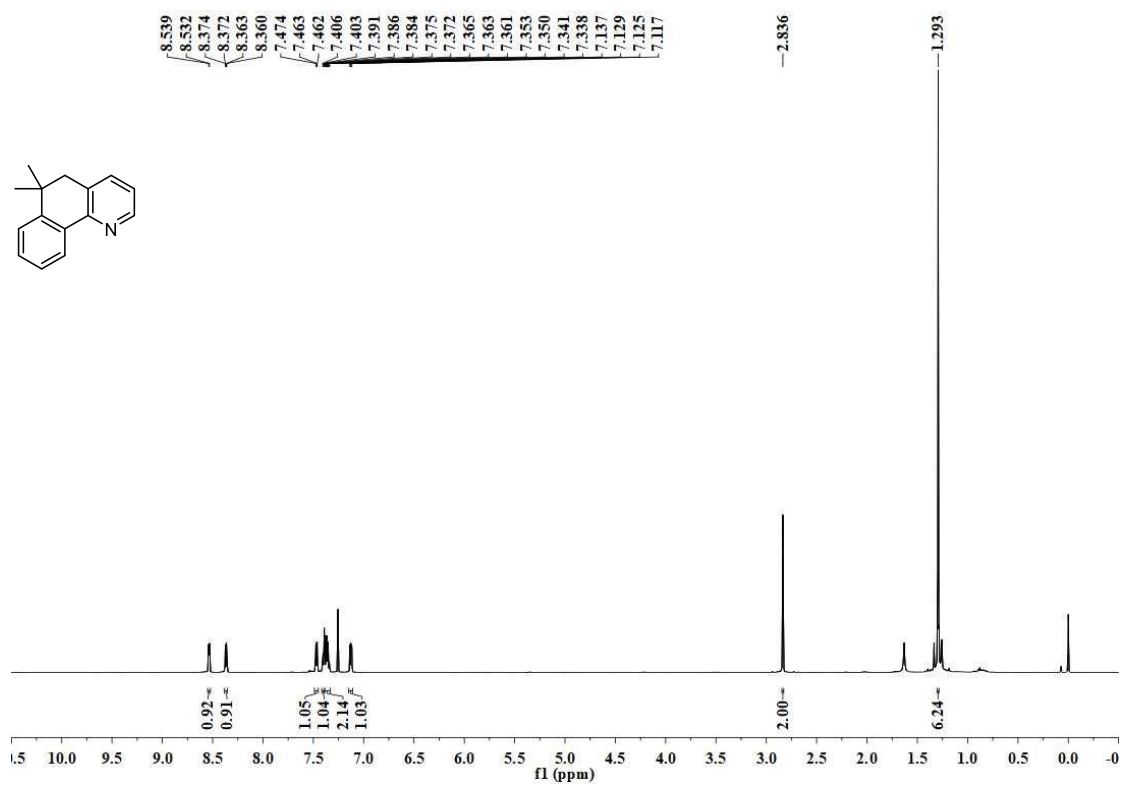

**$^{13}\text{C}$  NMR Spectrum of **74** (151 MHz,  $\text{CDCl}_3$ )**

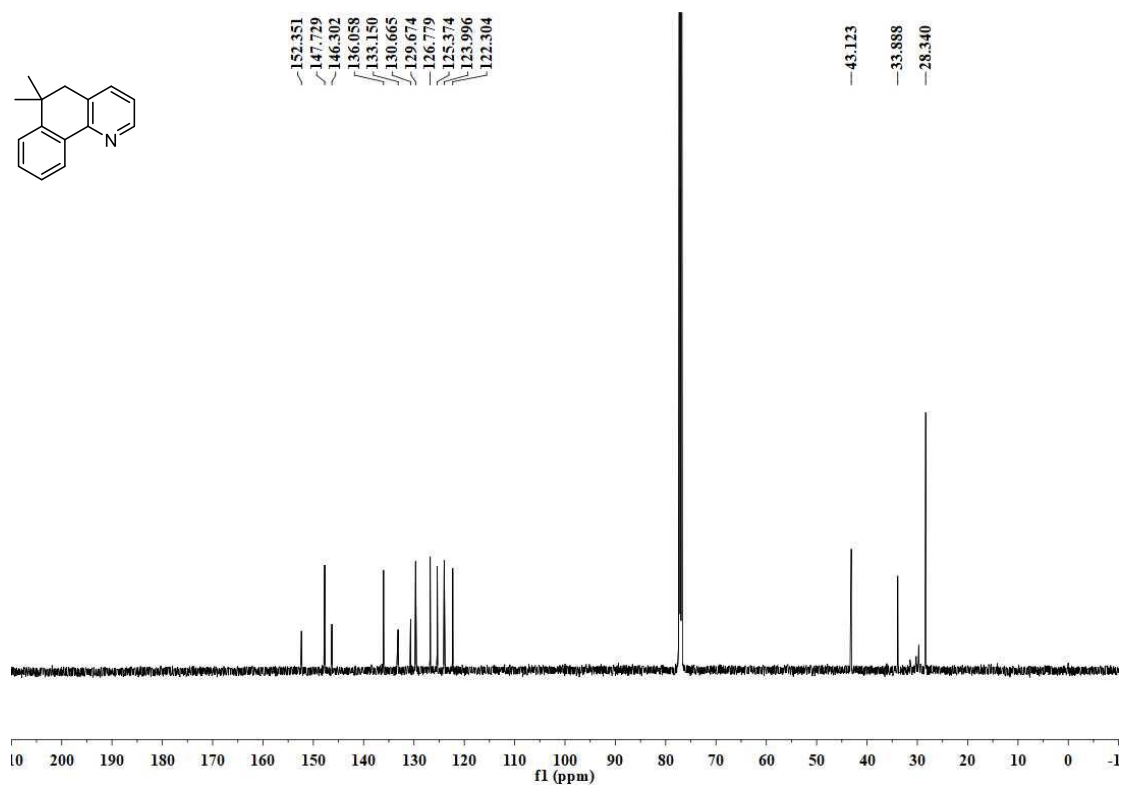

**$^1\text{H}$  NMR Spectrum of **77** (600 MHz,  $\text{CDCl}_3$ )**

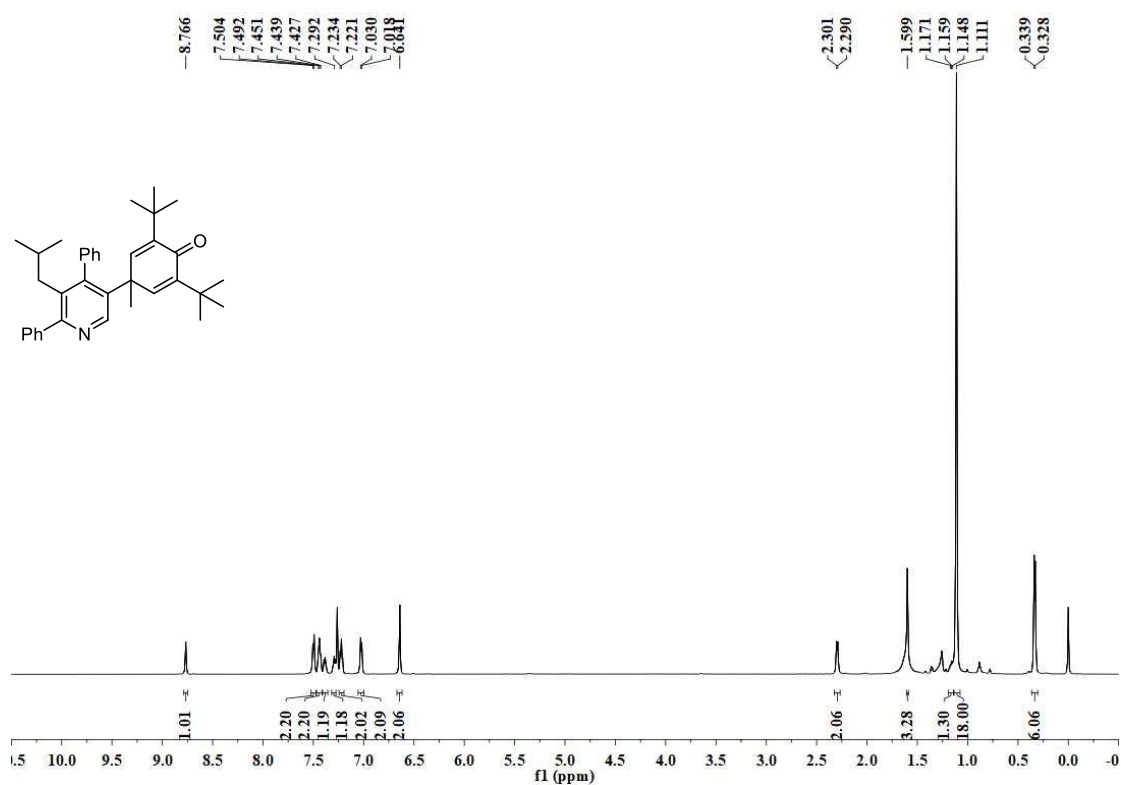

**$^{13}\text{C}$  NMR Spectrum of 77 (151 MHz,  $\text{CDCl}_3$ )**

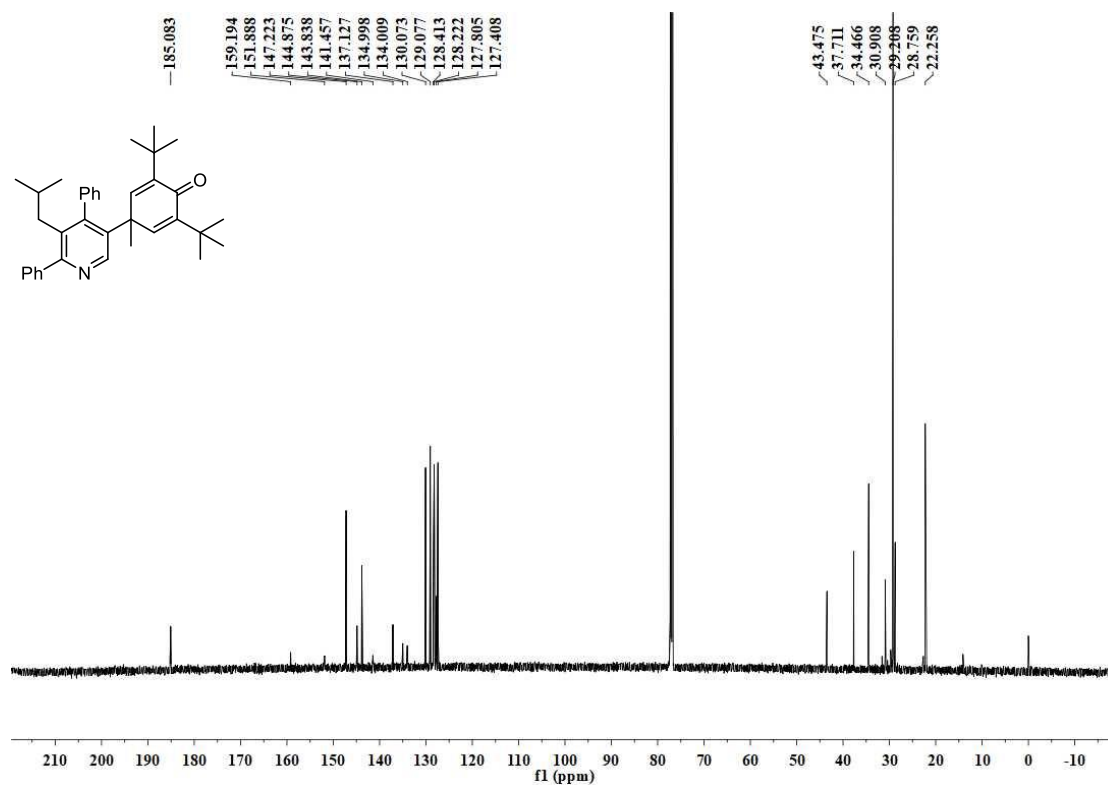

**$^1\text{H}$  NMR Spectrum of 81 (600 MHz,  $\text{CDCl}_3$ )**

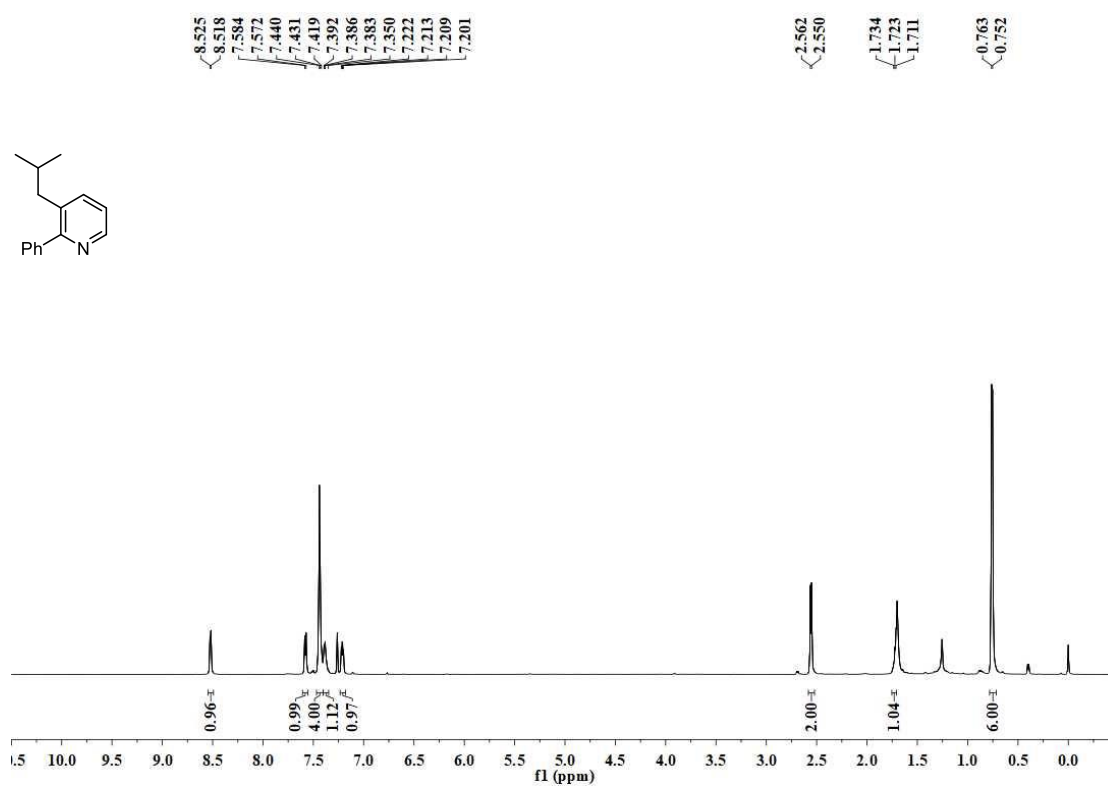

**<sup>13</sup>C NMR Spectrum of 81 (151 MHz, CDCl<sub>3</sub>)**

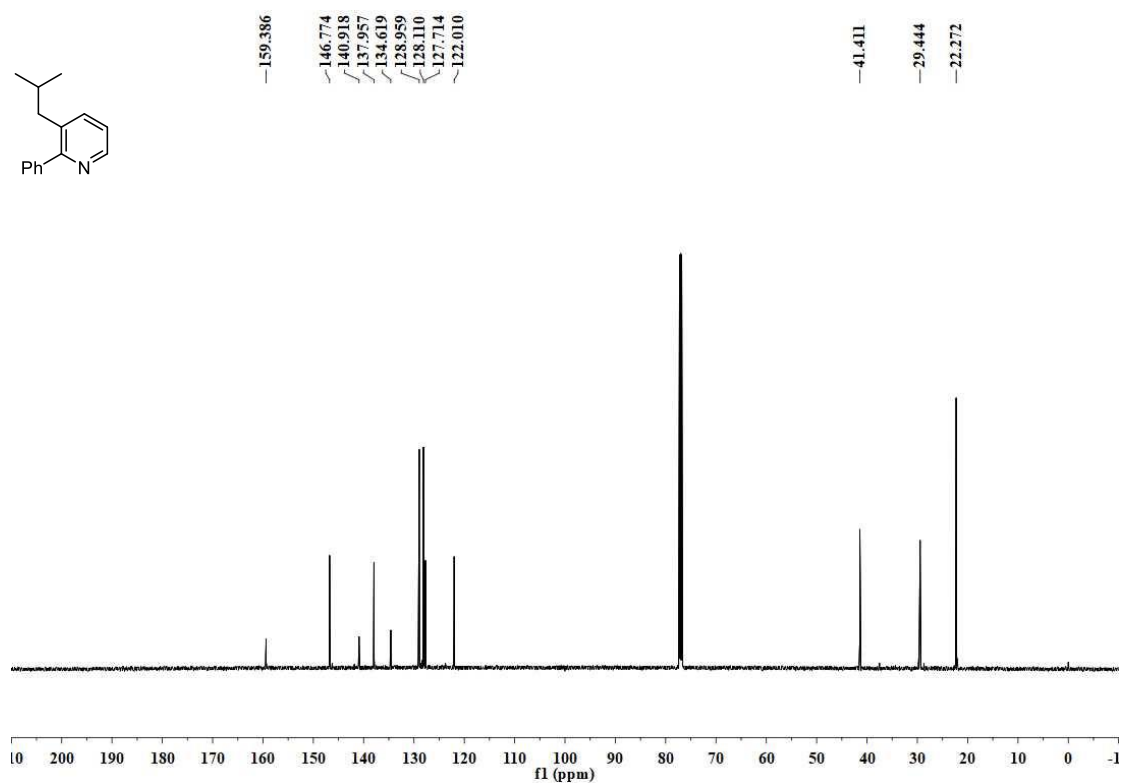

**<sup>1</sup>H NMR Spectrum of 82 (600 MHz, CDCl<sub>3</sub>)**

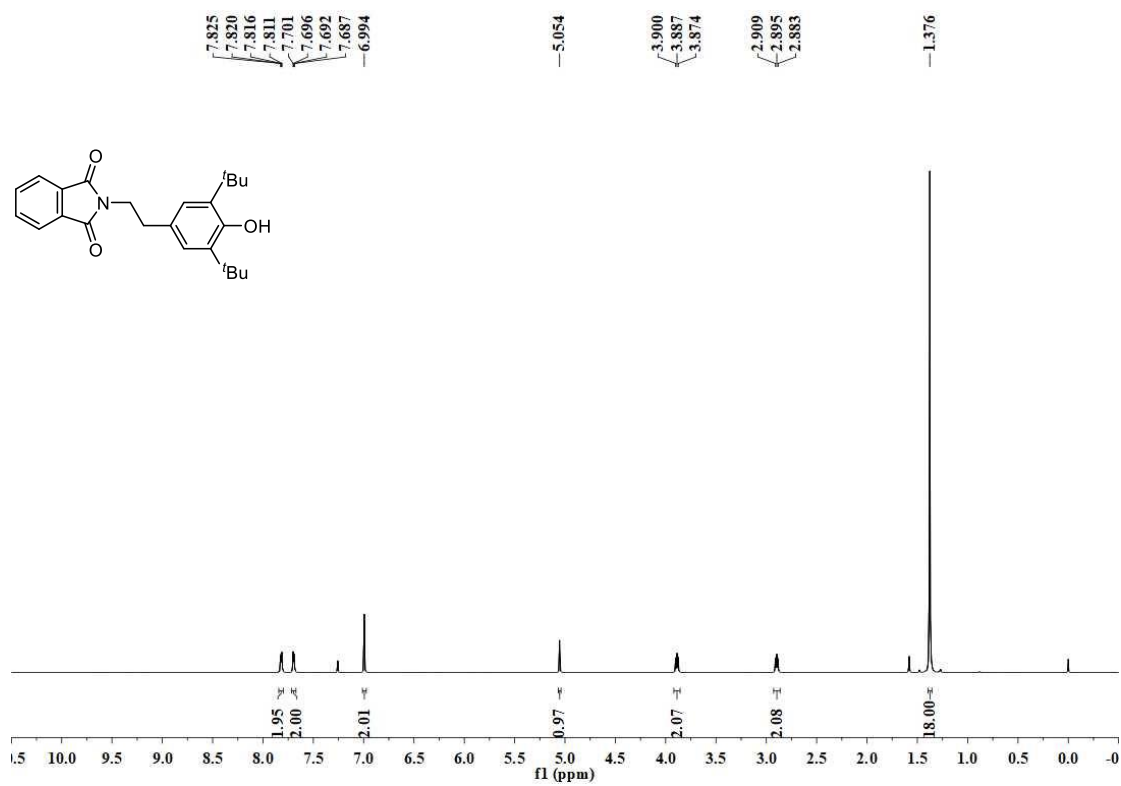

**$^{13}\text{C}$  NMR Spectrum of **82** (151 MHz,  $\text{CDCl}_3$ )**

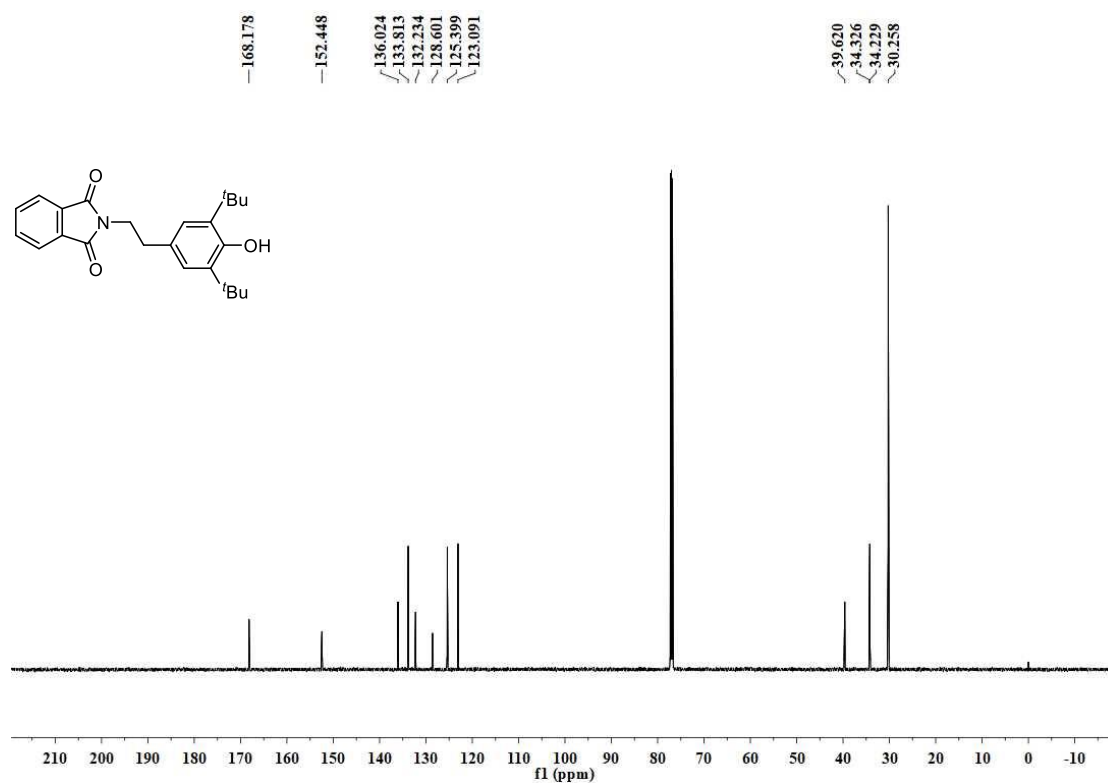

**$^1\text{H}$  NMR Spectrum for the mixture of **89** and **90** (600 MHz,  $\text{CDCl}_3$ )**

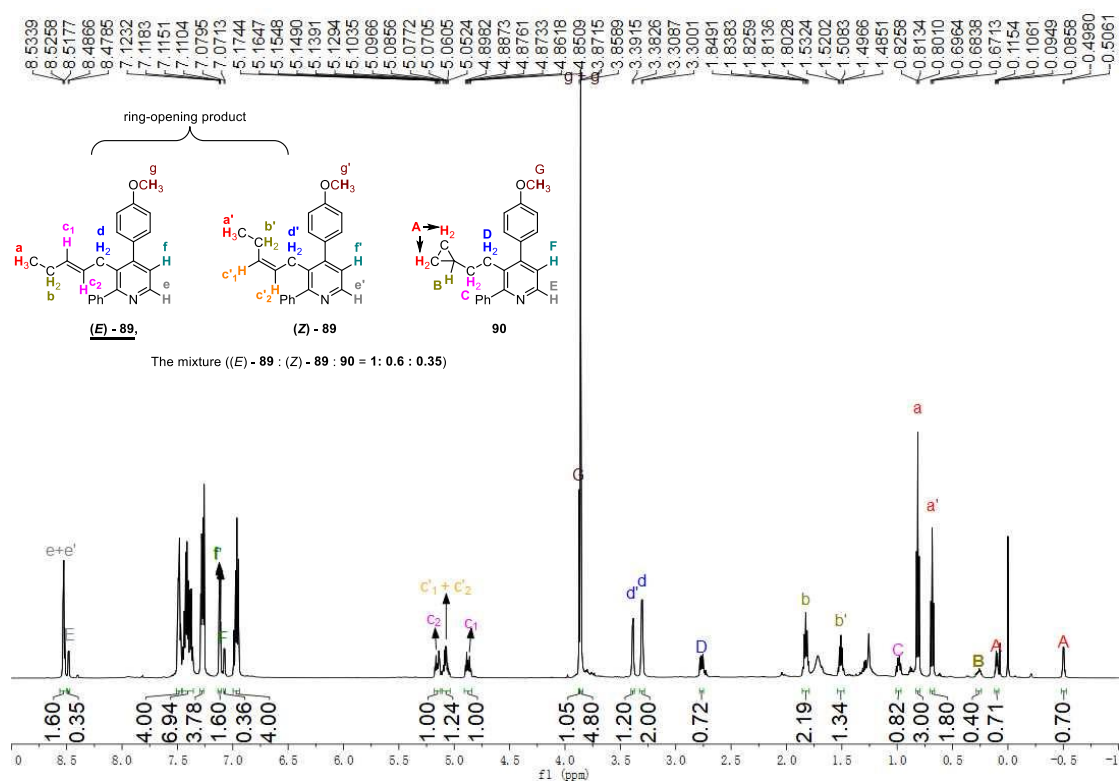

Supplement: d4sc01858c1.pdf [file d4sc01858c1.pdf]
